# Supplementary material for: Crosstalk between Host Genome and Metabolome among People with HIV in South Africa
Source: MDPI journal article supplement (doi:10.3390/metabo12070624), 2022-07-06

Manhattan plot for mz87.0087\_t22.3, pyruvate

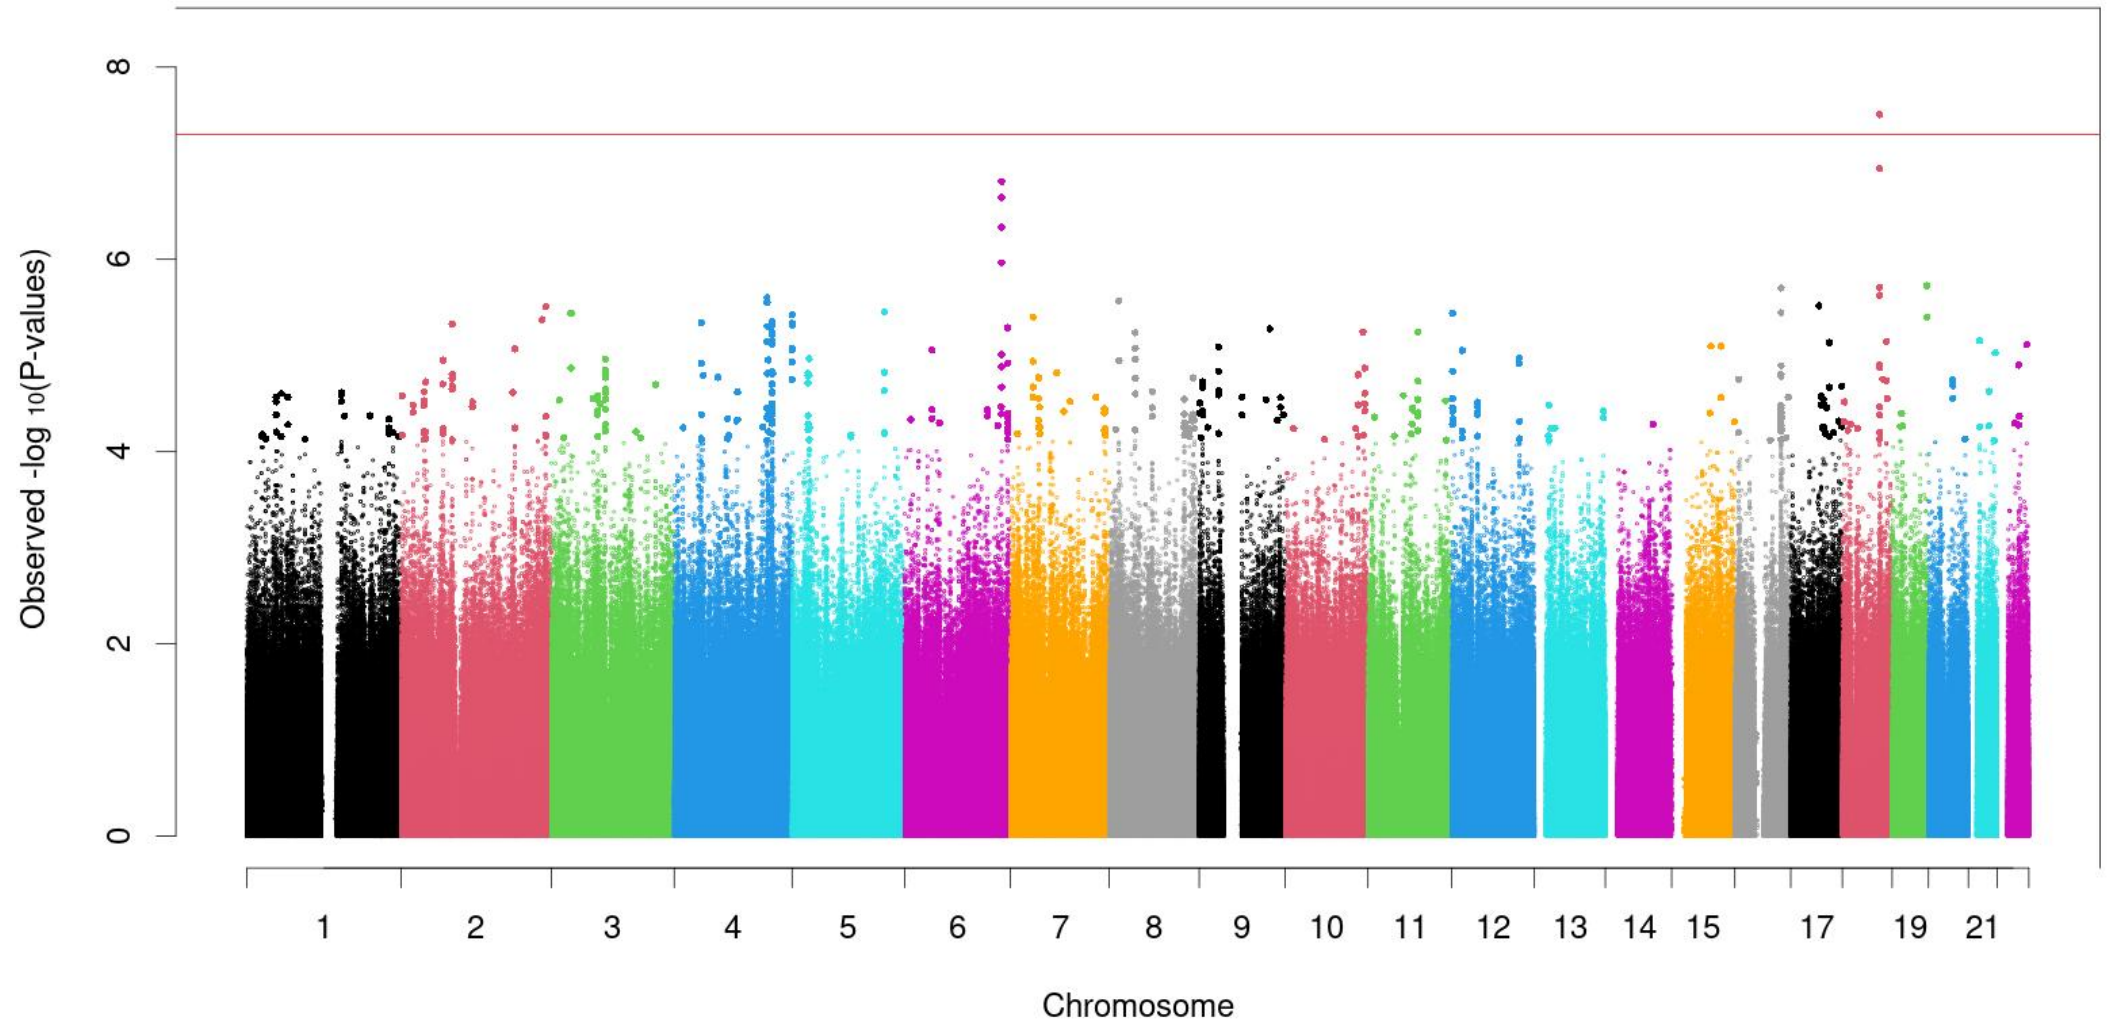

Manhattan plot for mz89.0244\_t22.1, (s)-lactate

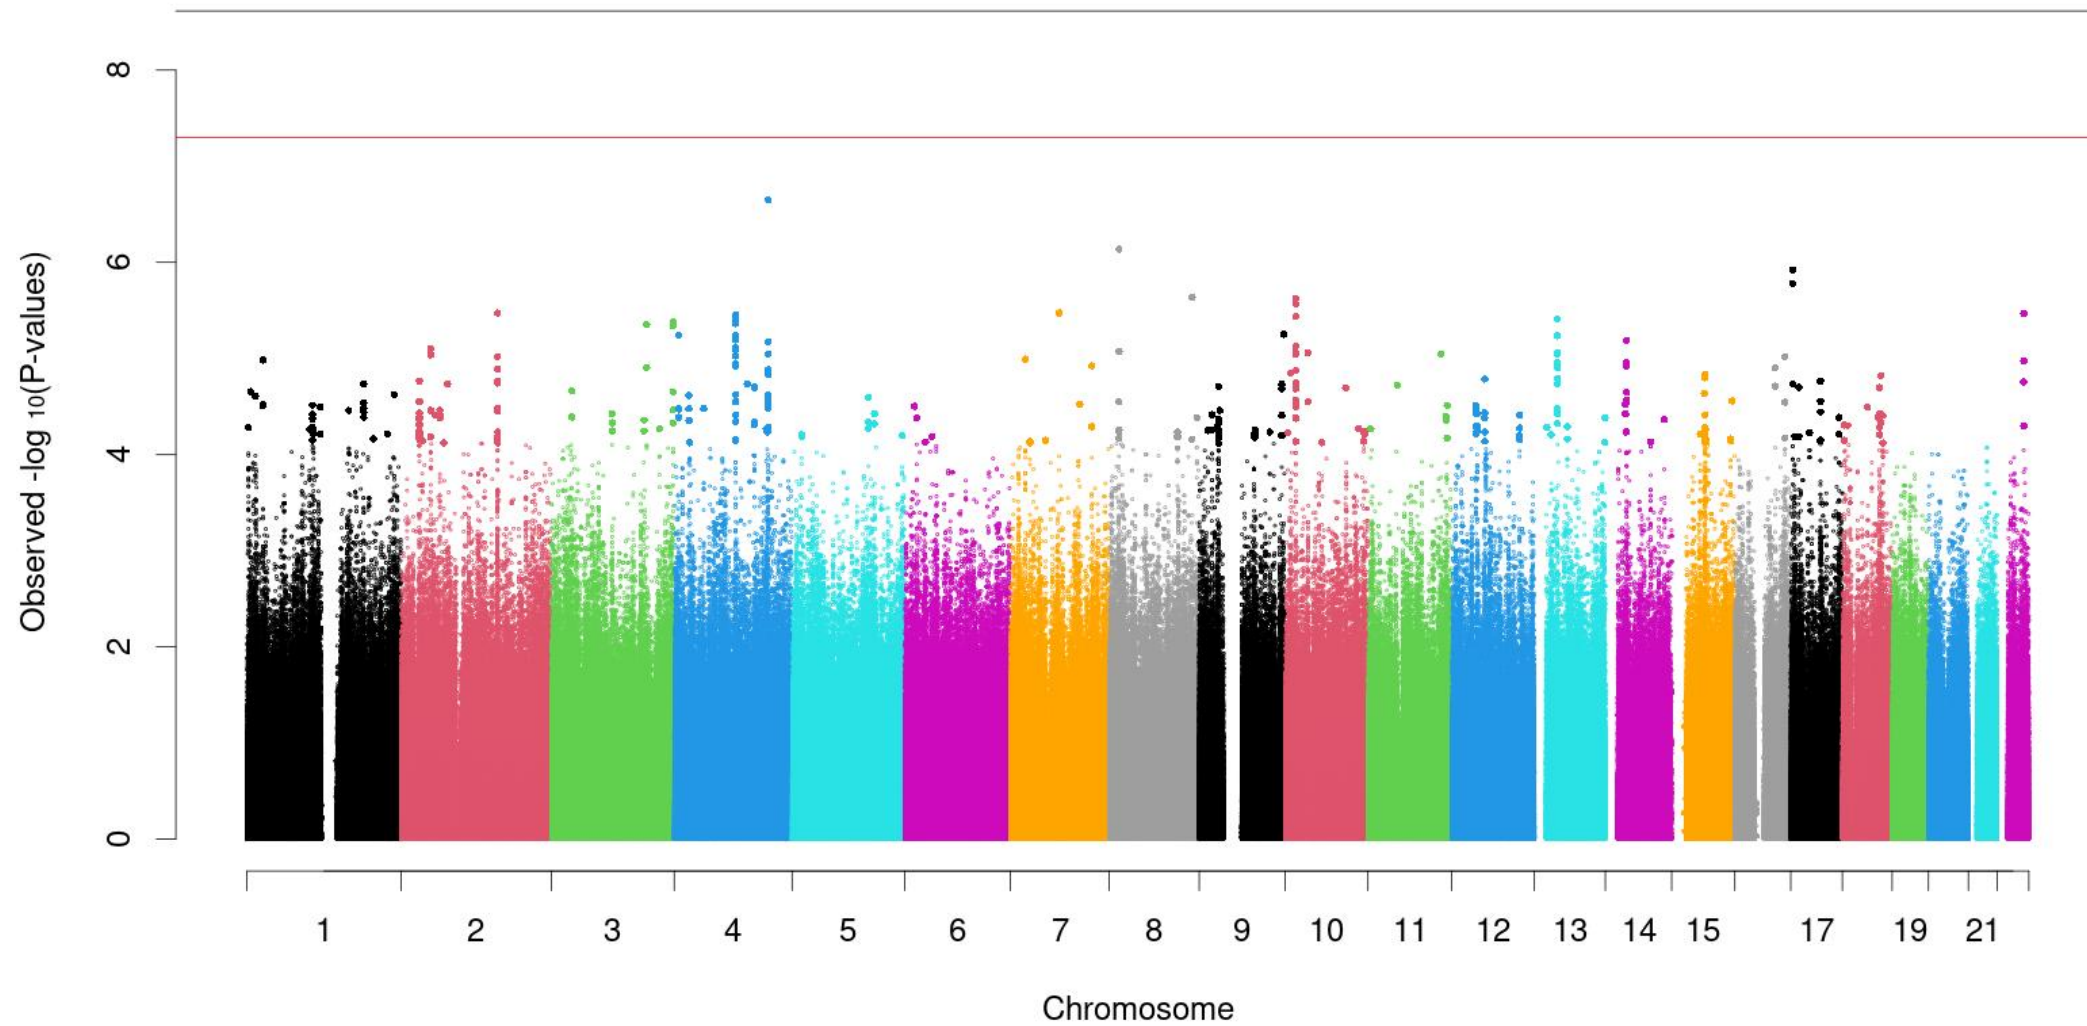

Manhattan plot for mz90.0551\_t71.3, beta-alanine

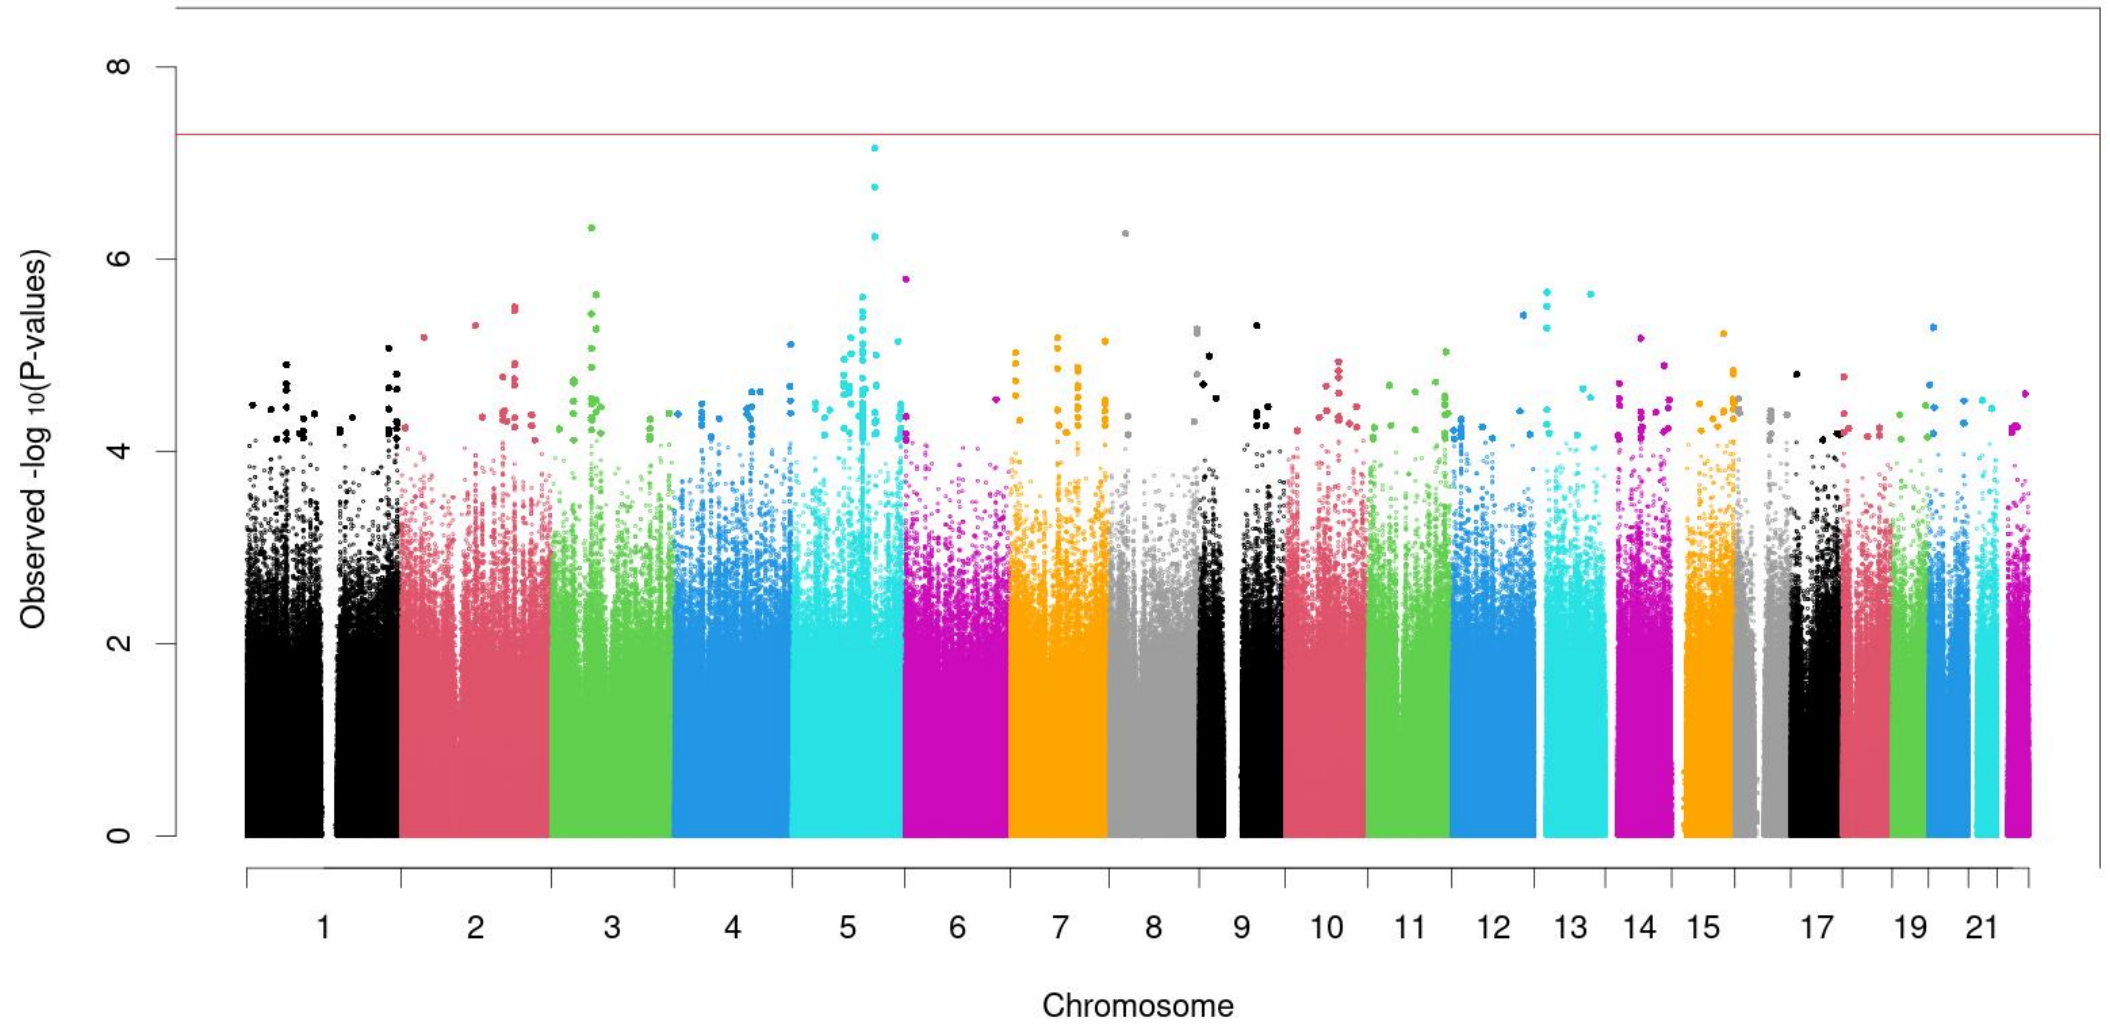

Manhattan plot for mz94.0653\_t45.9, aniline

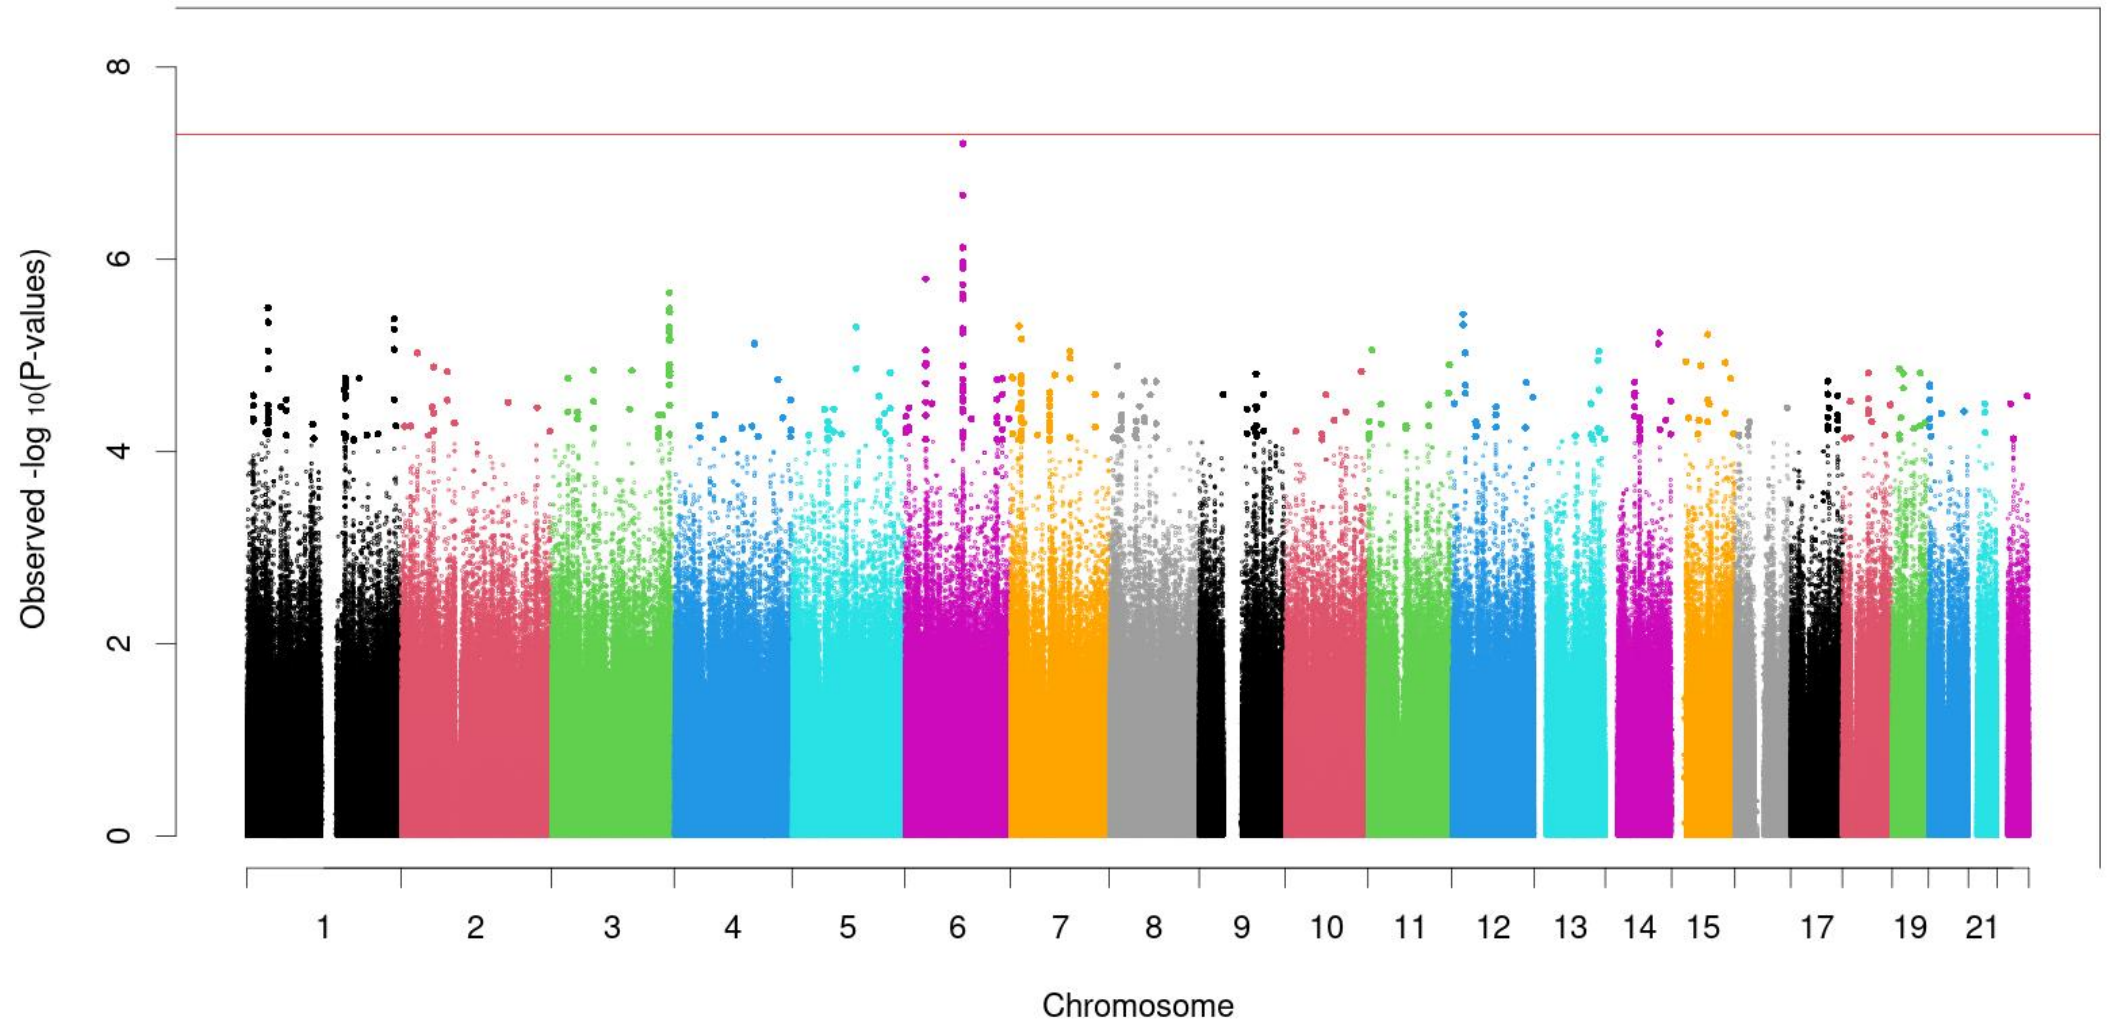



Manhattan plot for mz96.0445\_t35.3, 2-hydroxypyridine

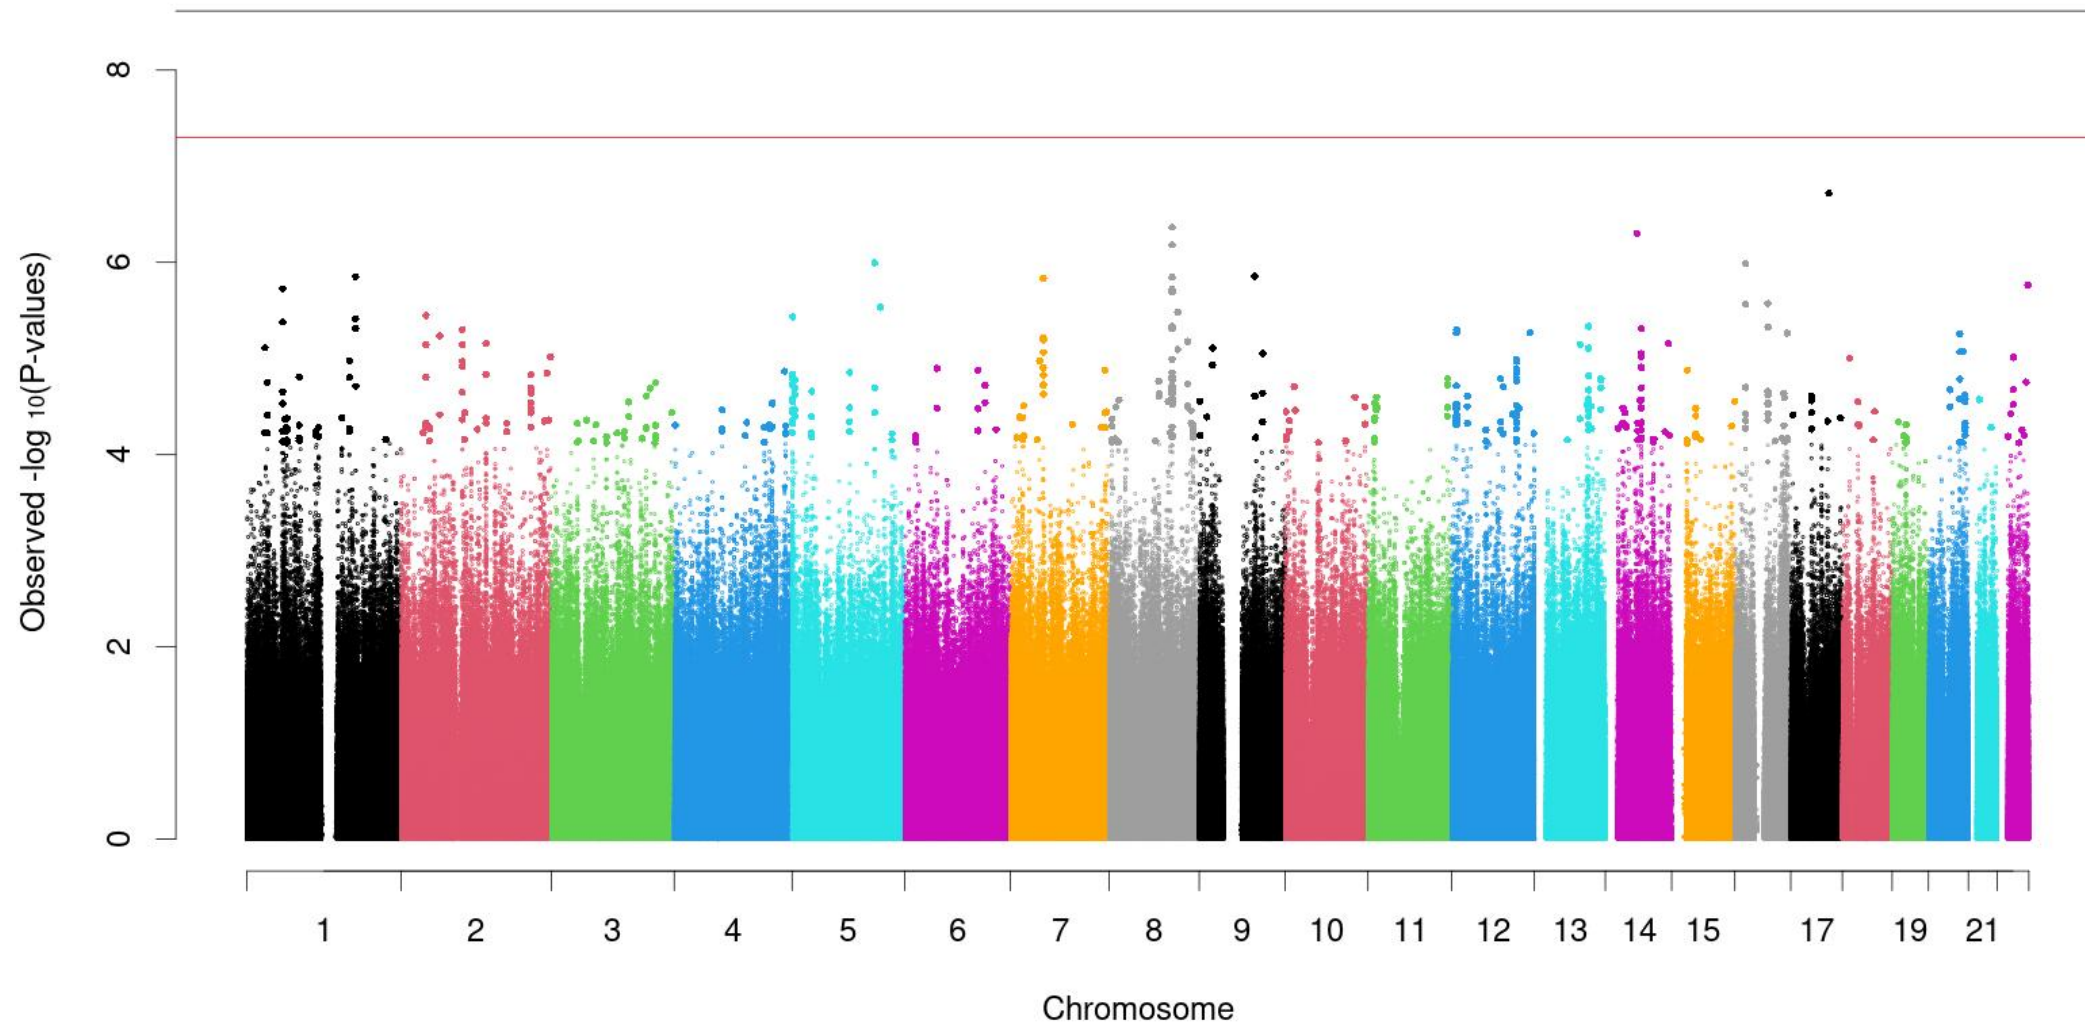

Manhattan plot for mz101.06\_t20, 5-valerolactone

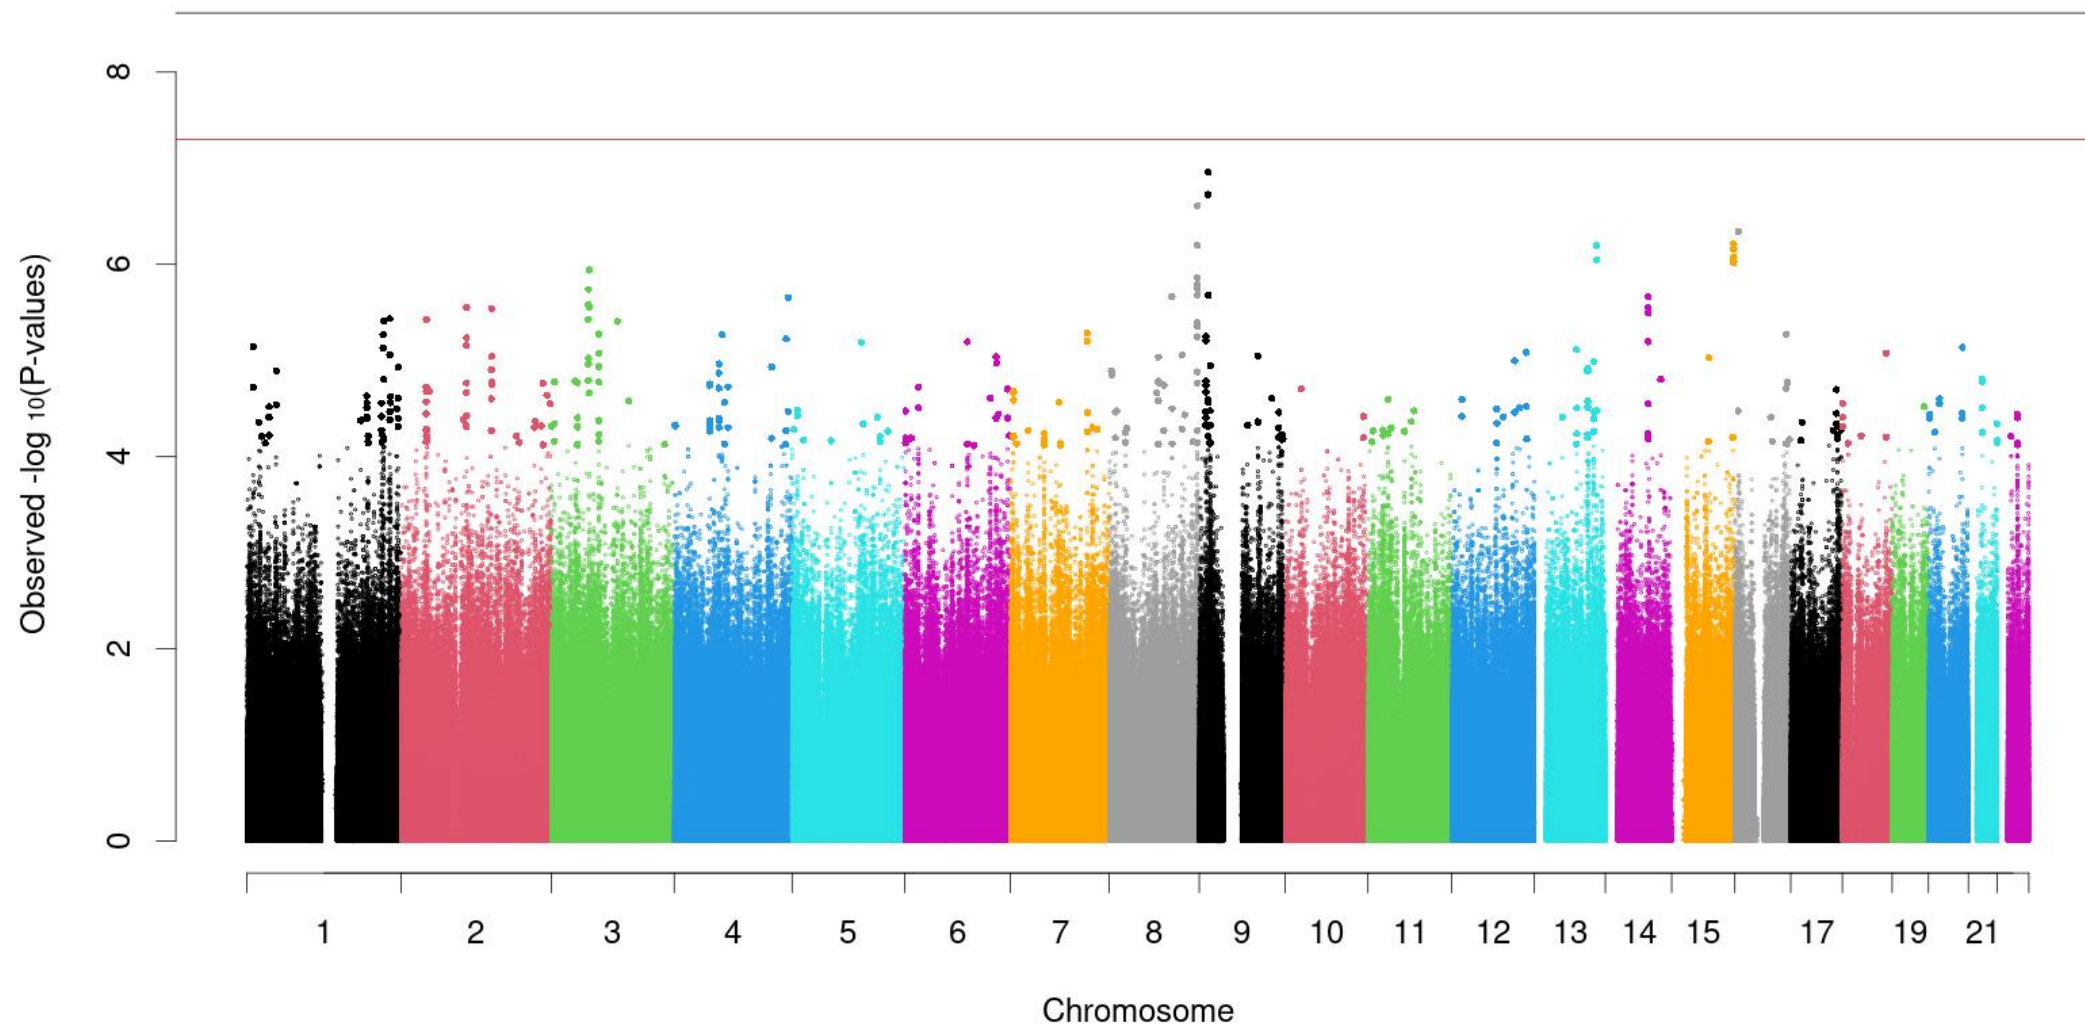

Manhattan plot for mz102.055\_t78.3, 1-aminocyclopropane-1-carboxylate

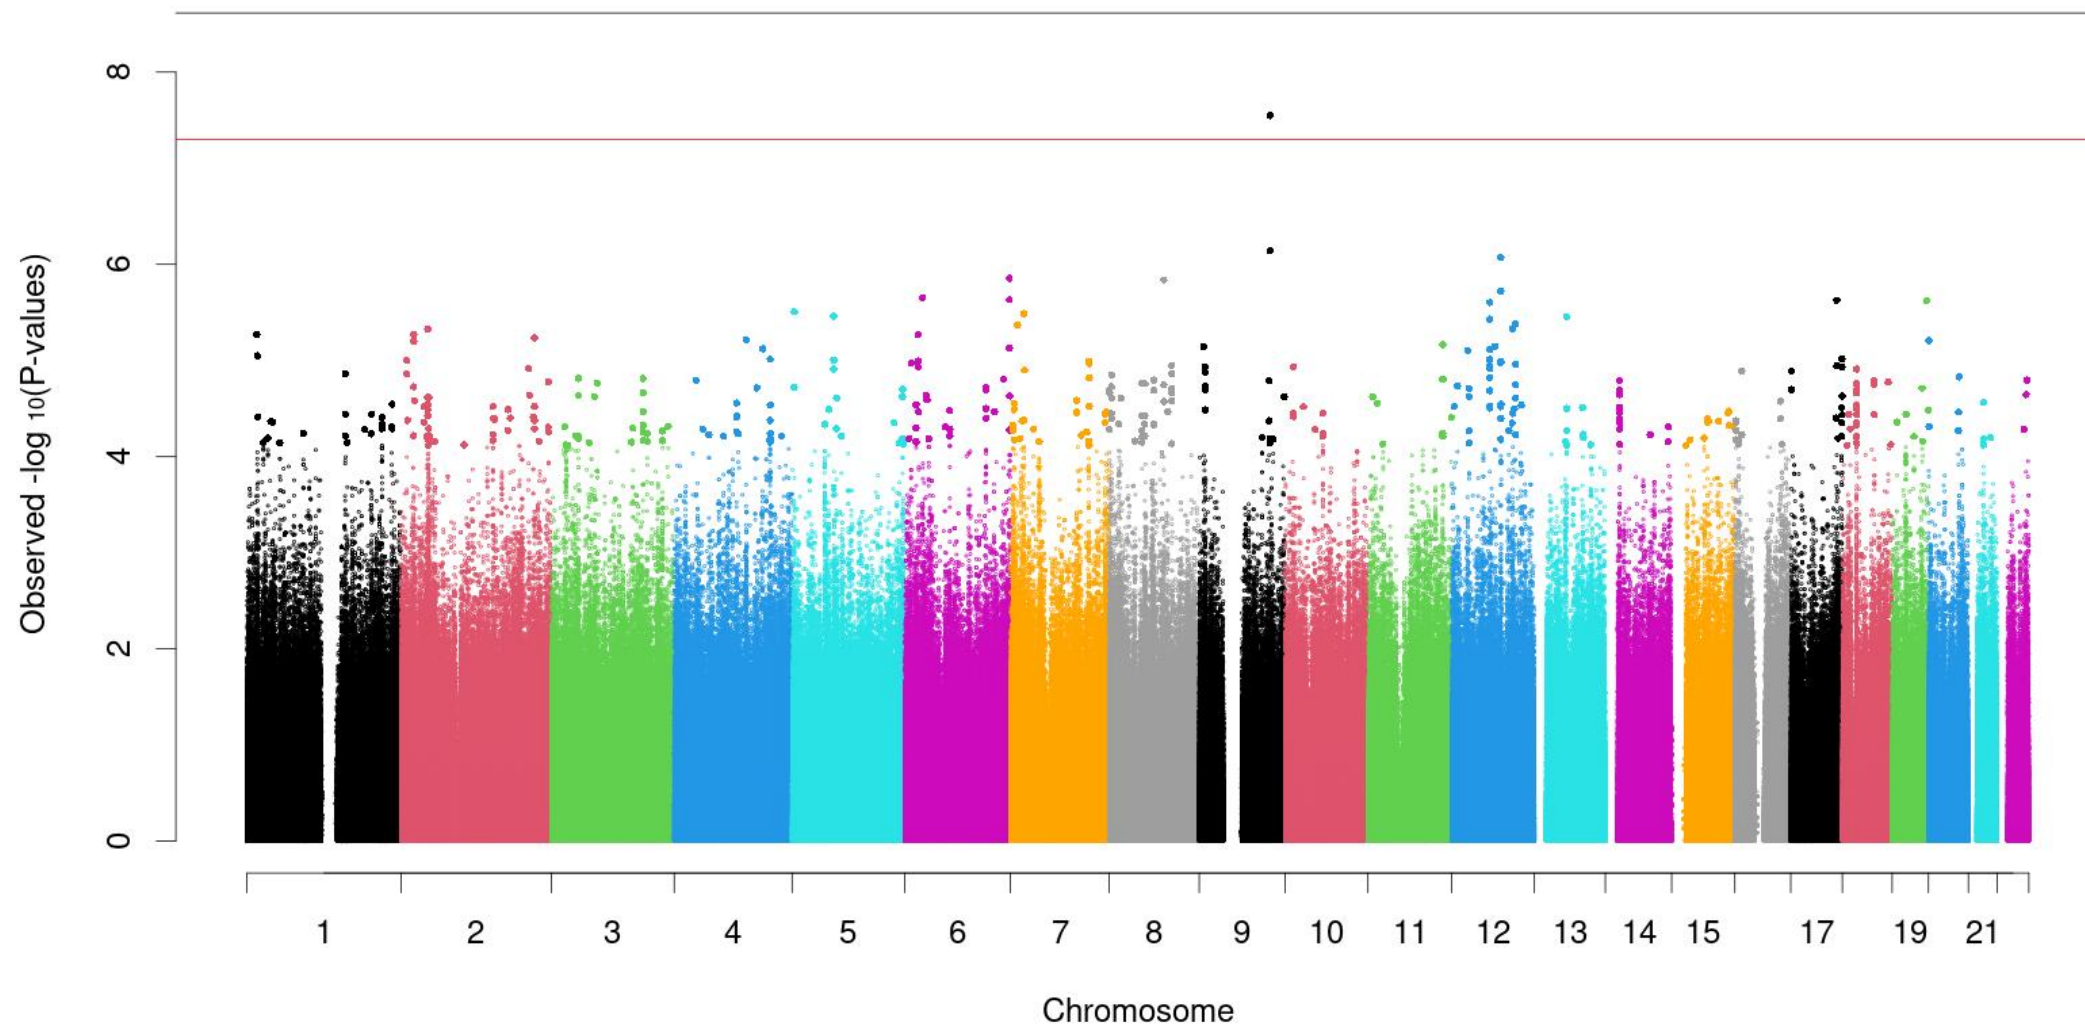



Manhattan plot for mz103.0035\_t94, malonate

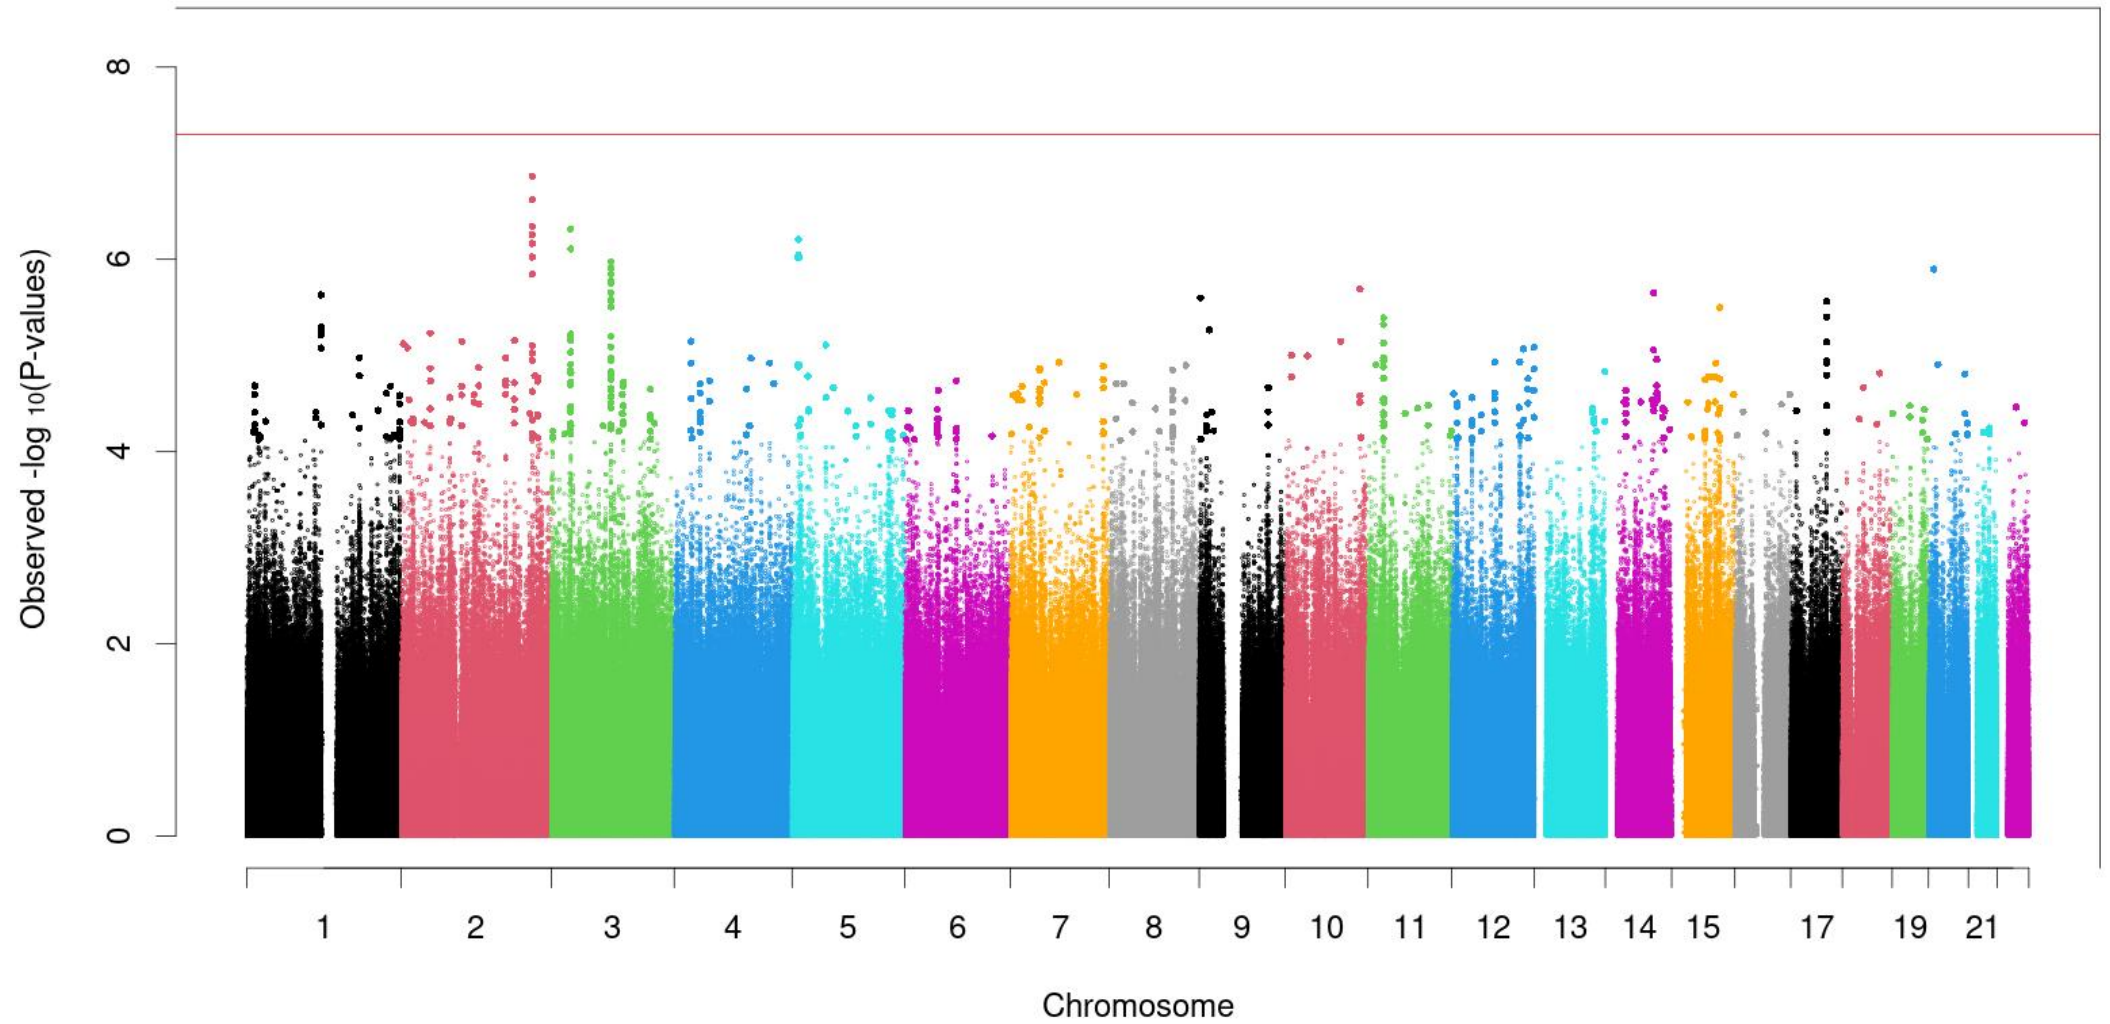



Manhattan plot for mz103.0391\_t80.3, 2-oxobutanoate

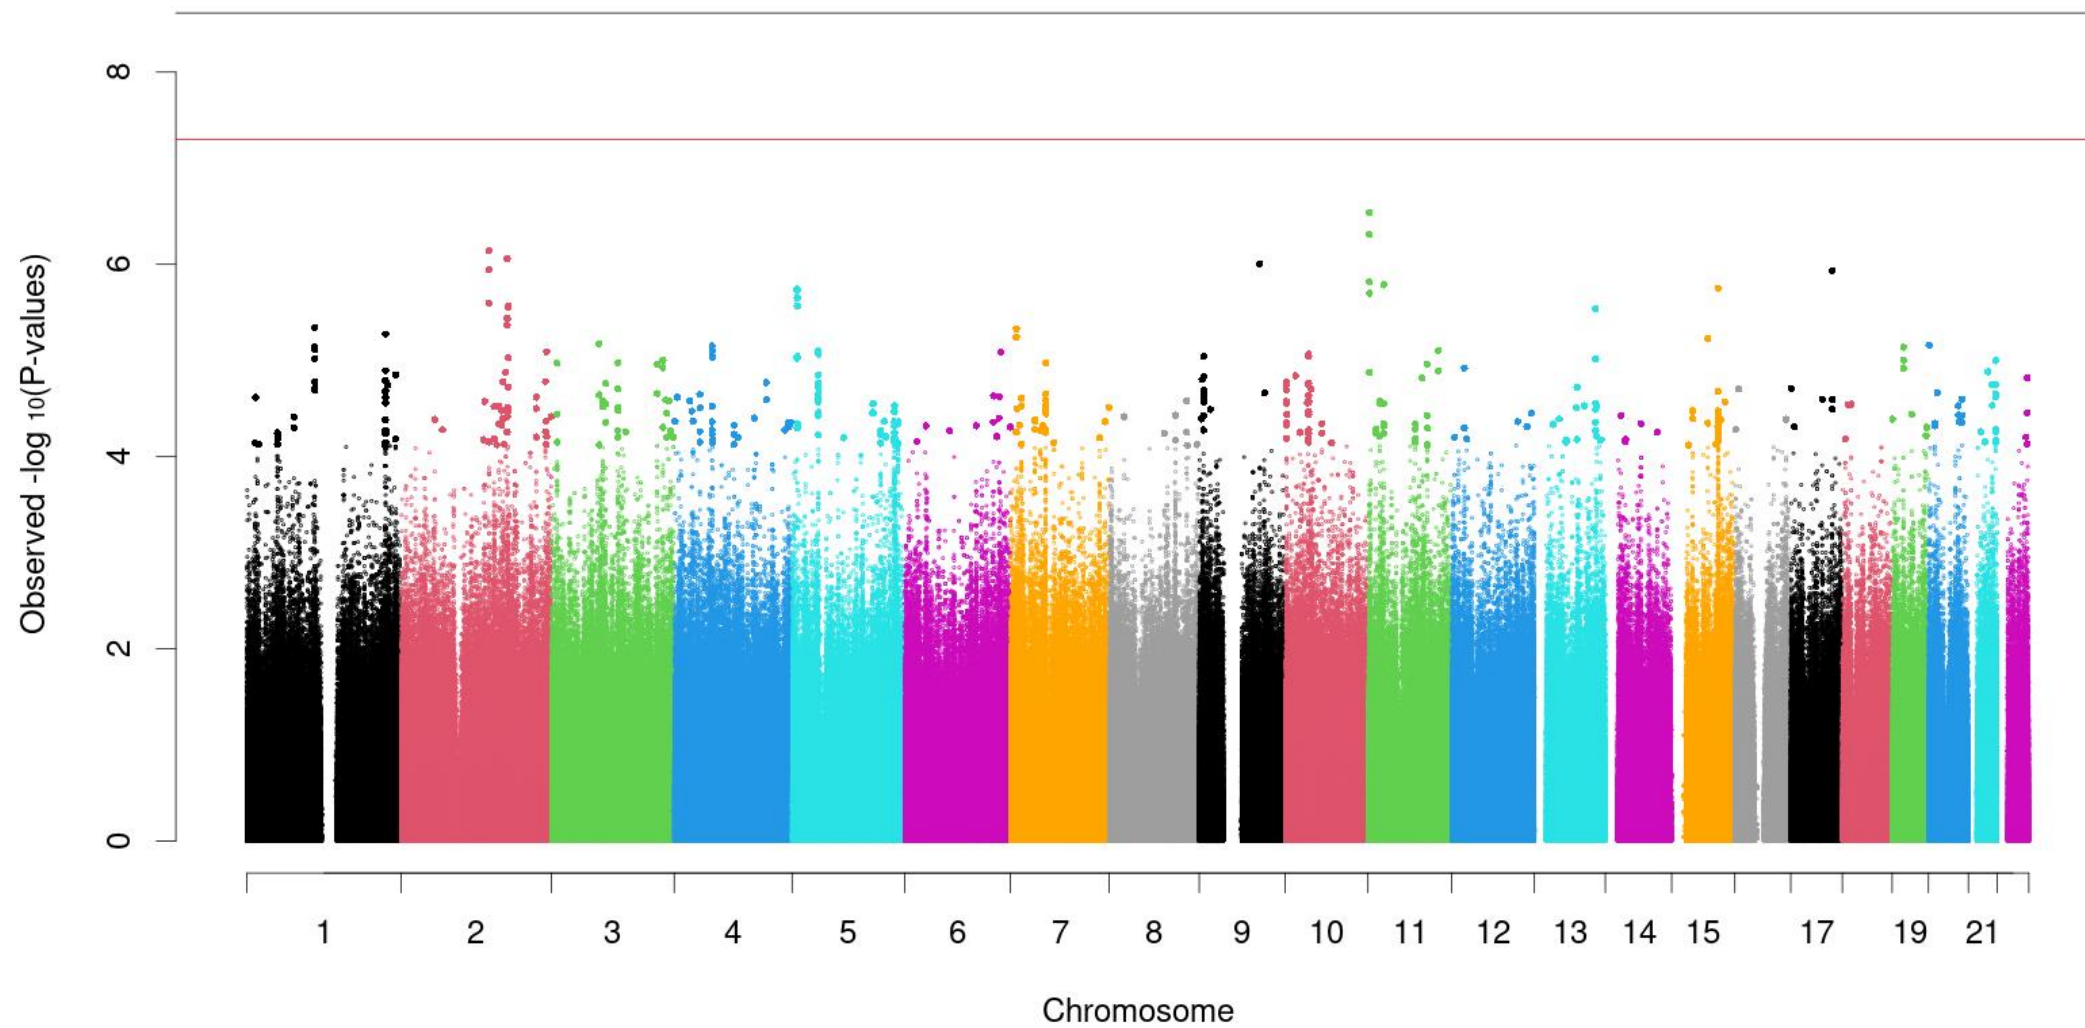

Manhattan plot for mz104.0351\_t26.8, serine

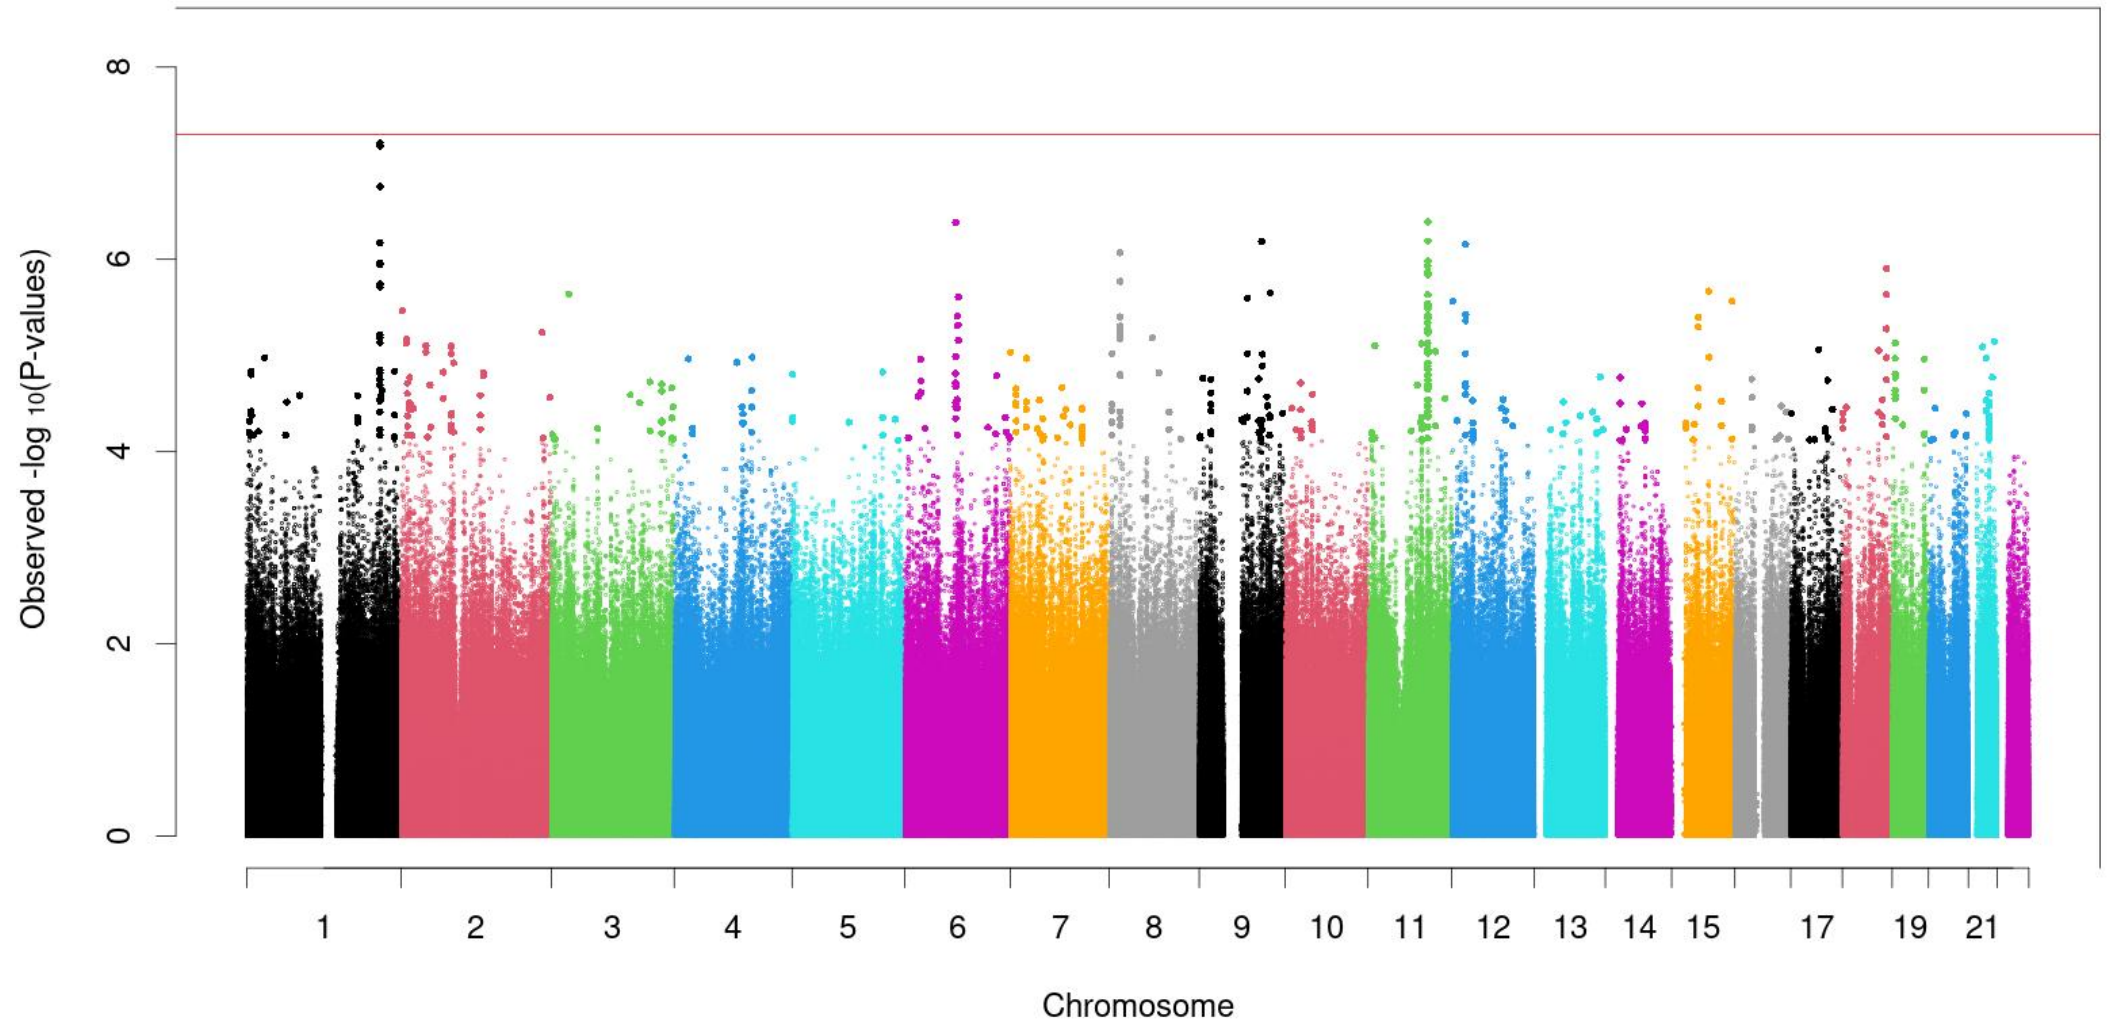

Manhattan plot for mz105.0193\_t22.9, glycerate

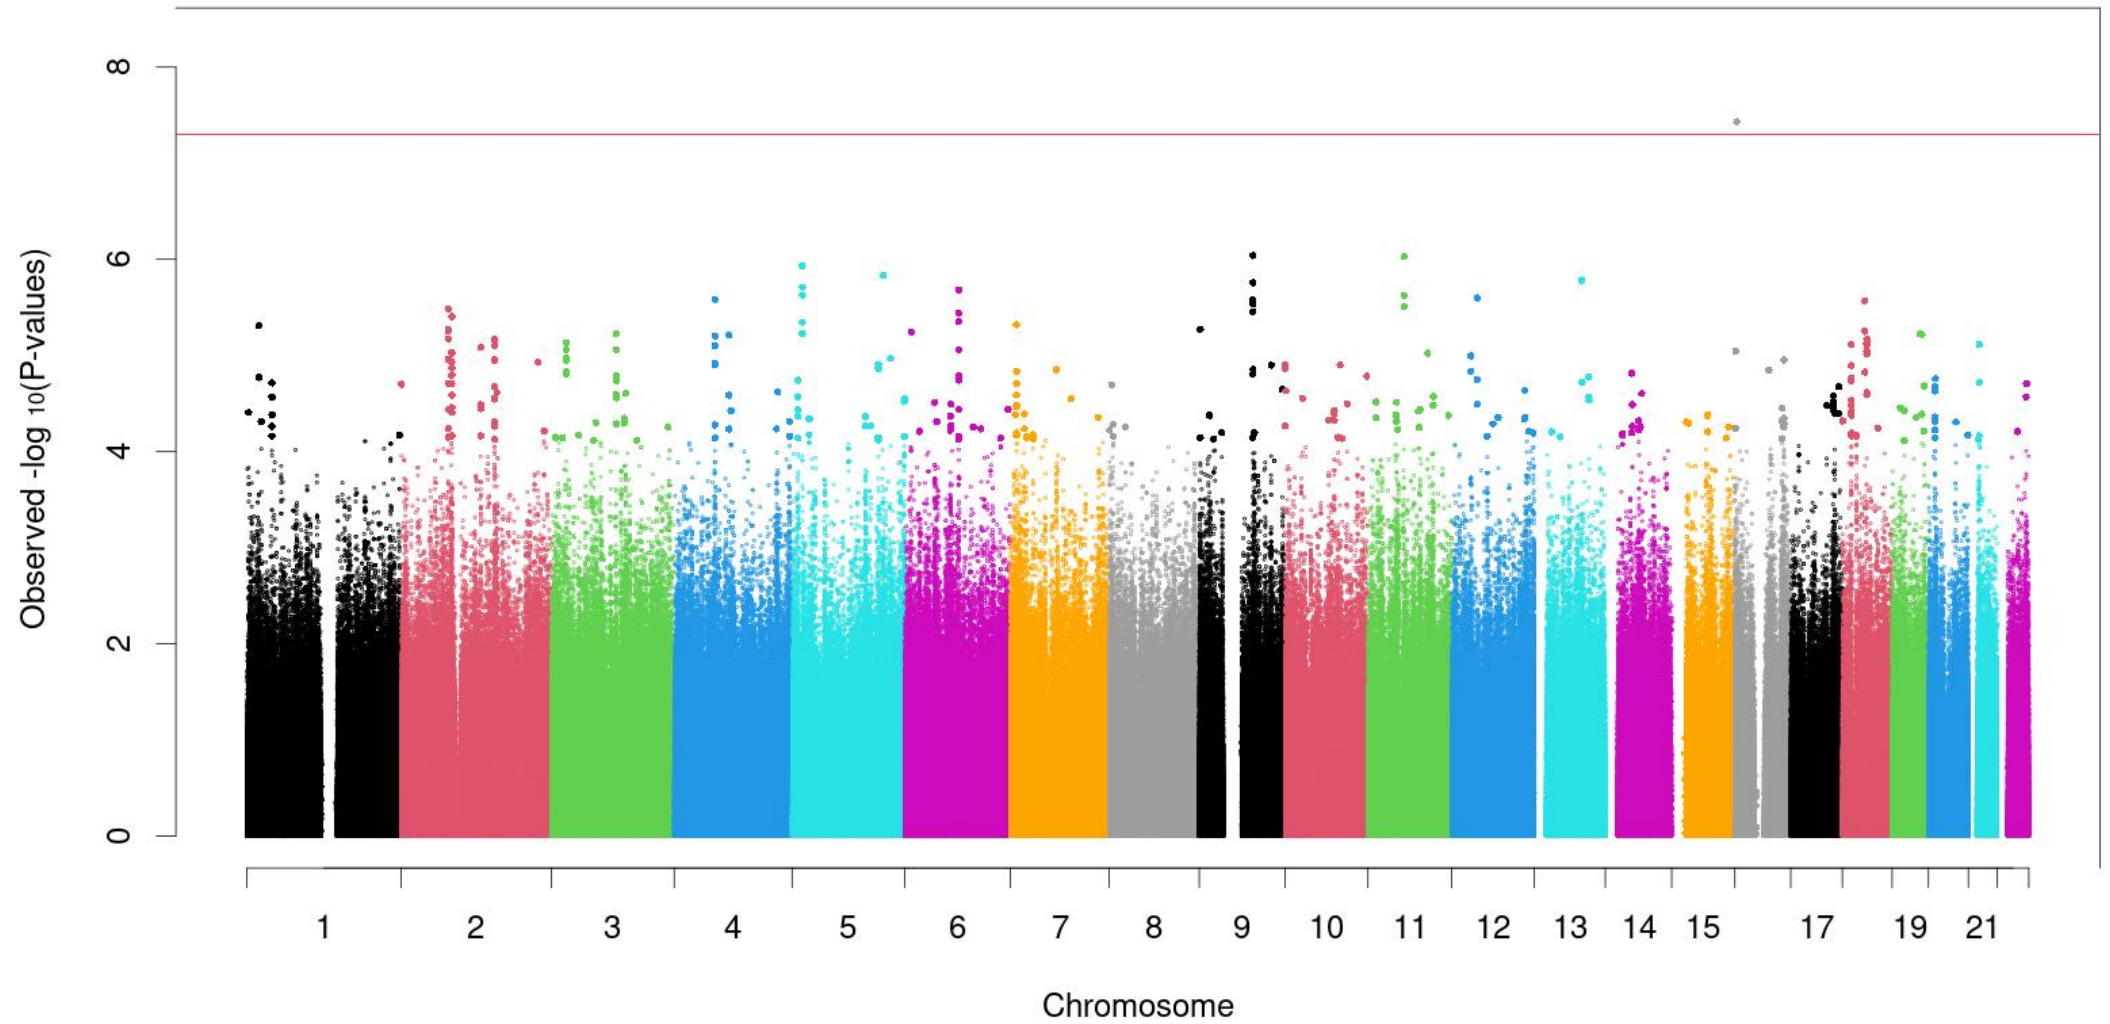



Manhattan plot for mz106.05\_t115, serine

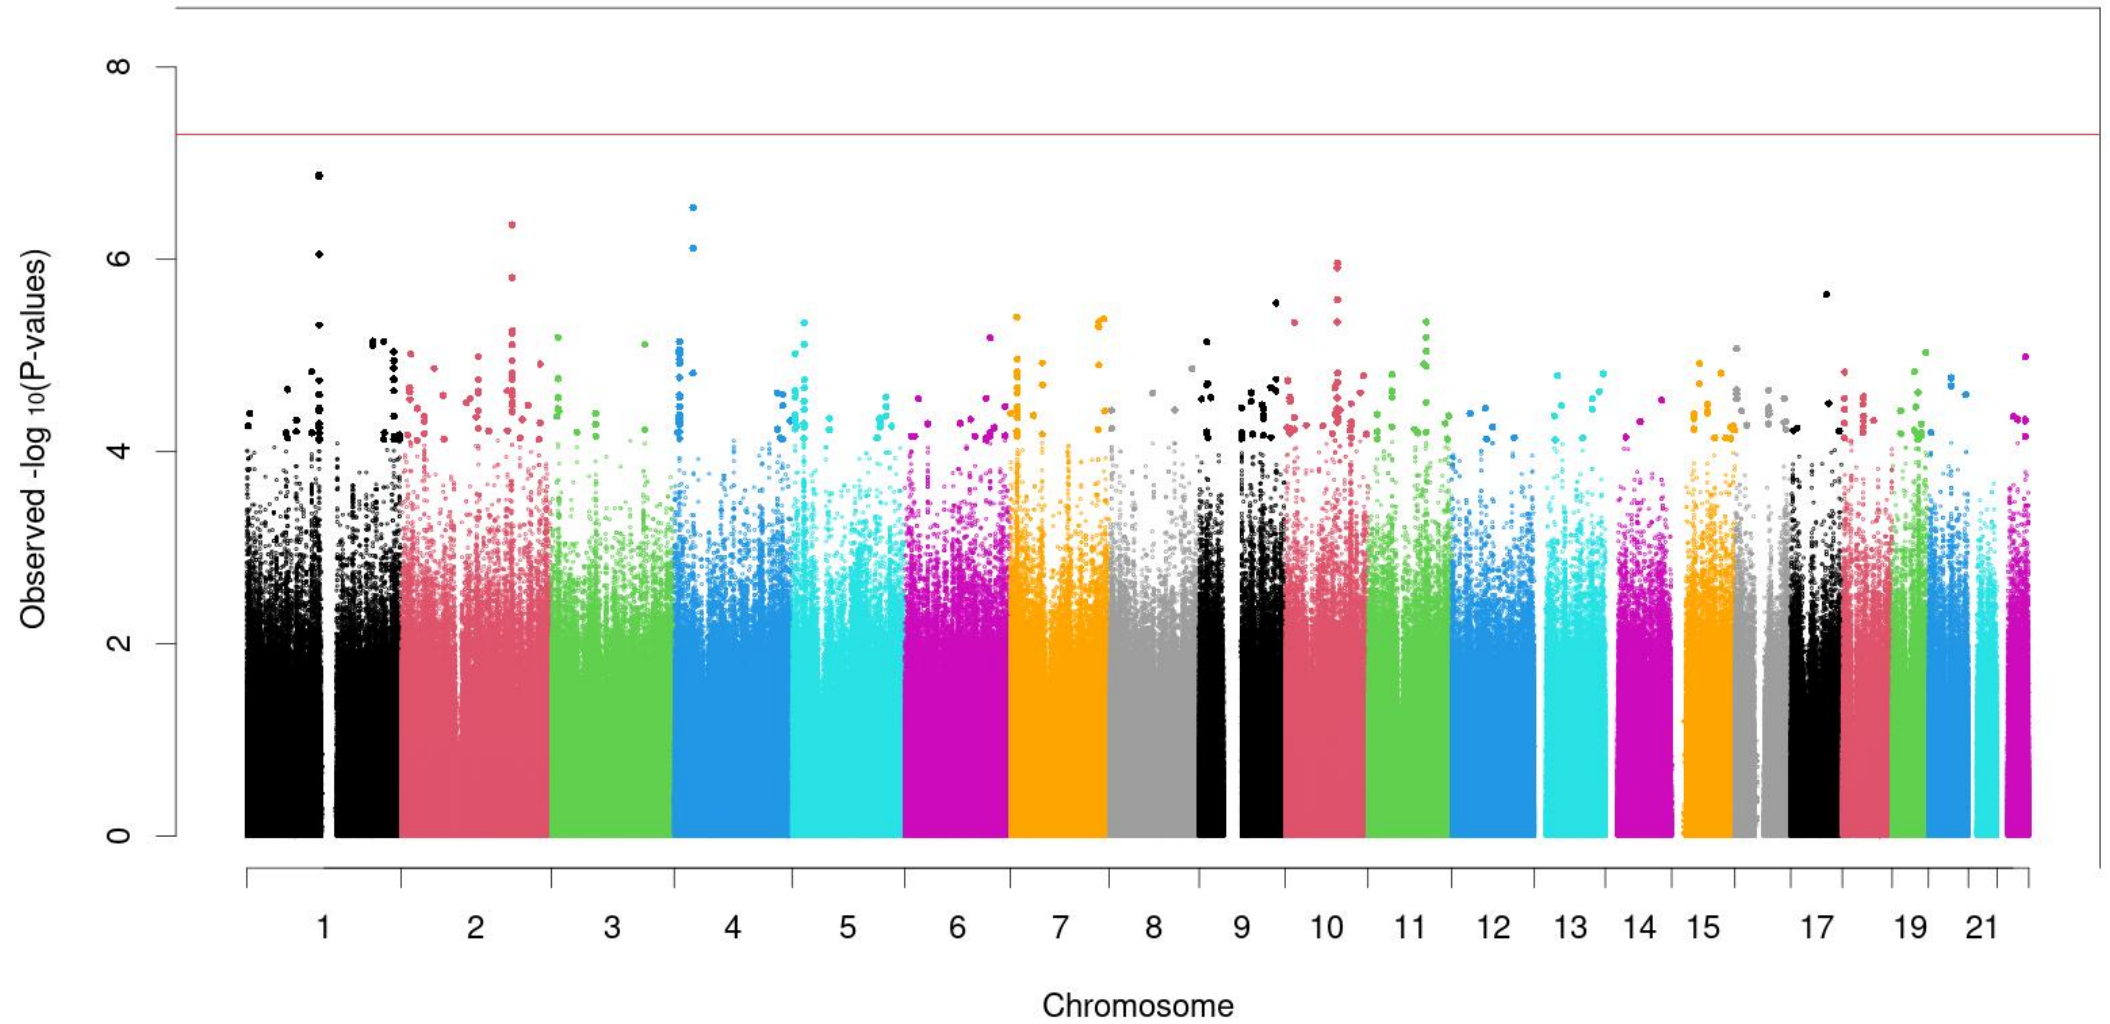



Manhattan plot for mz110.0272\_t66.7, hypotaurine

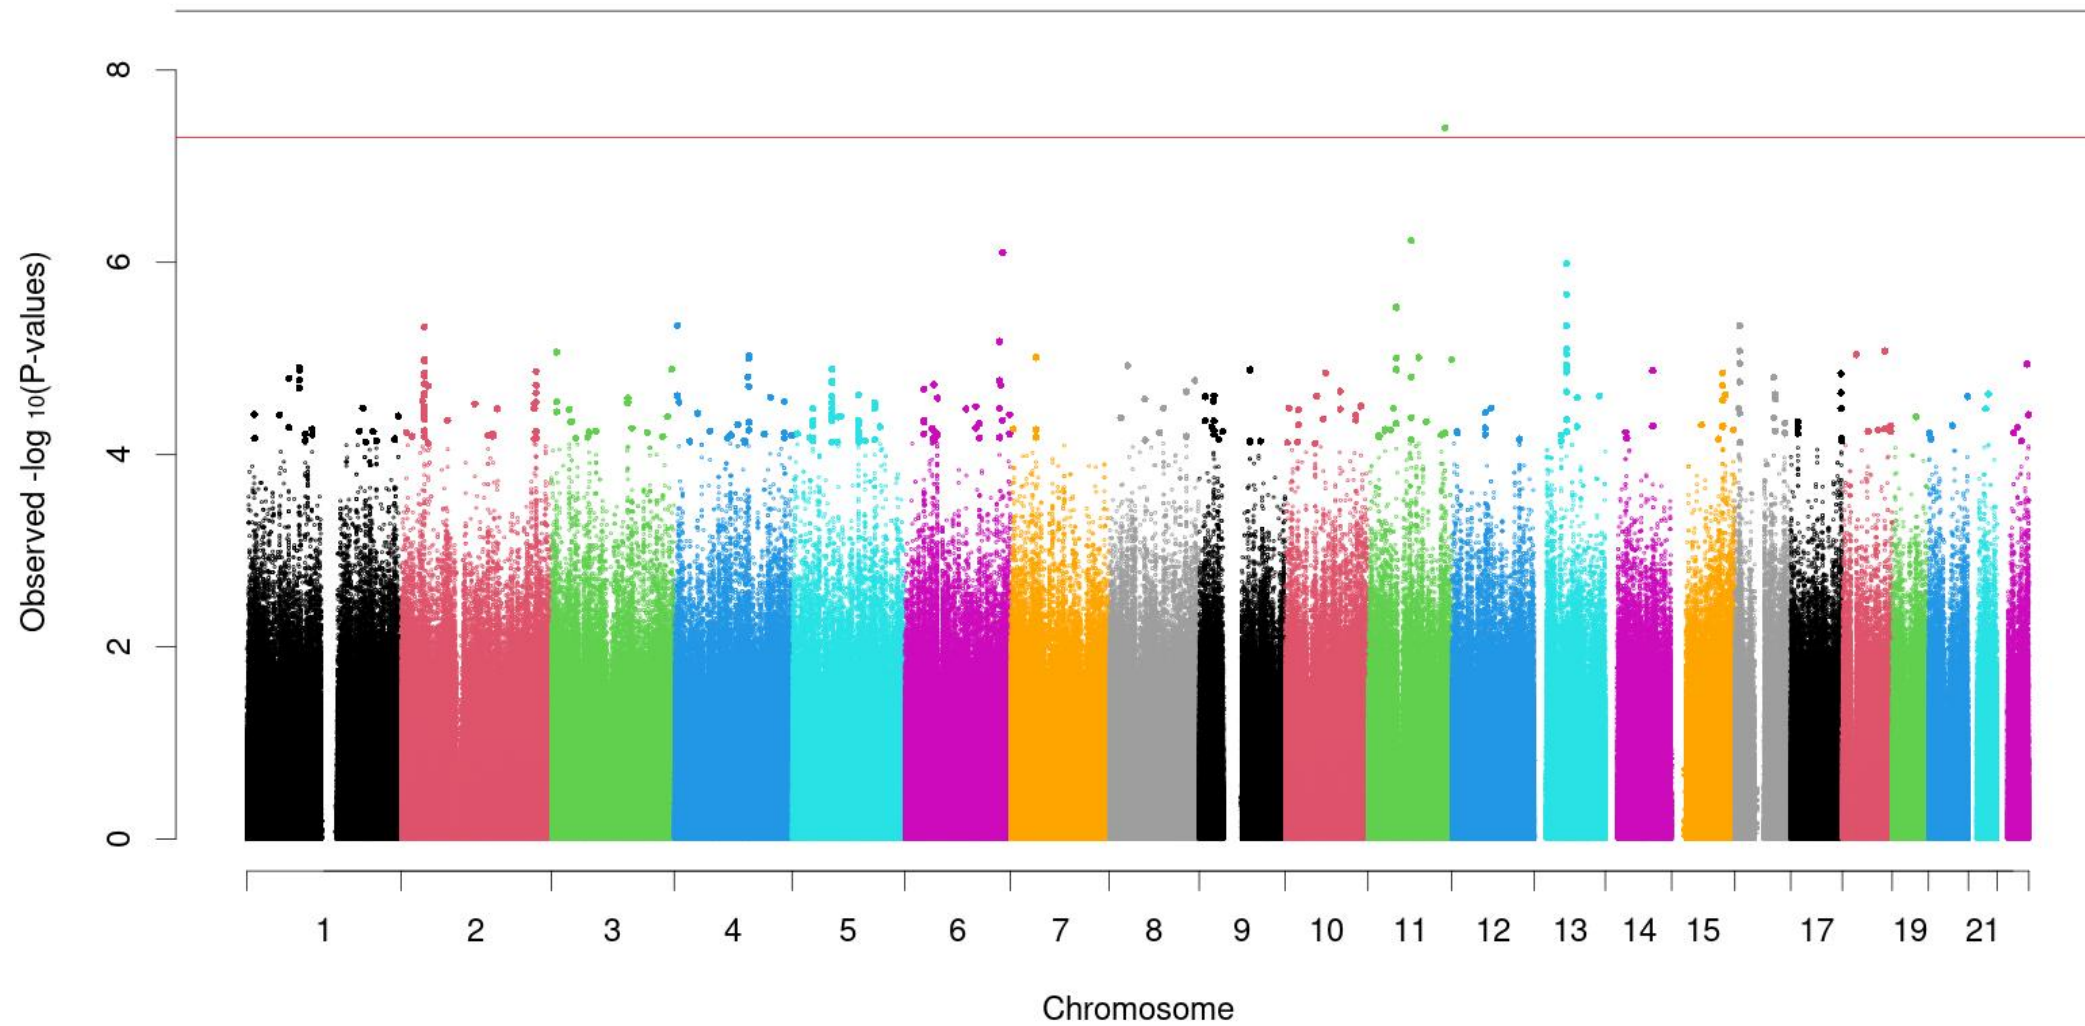

Manhattan plot for mz112.0516\_t24.7, creatinine

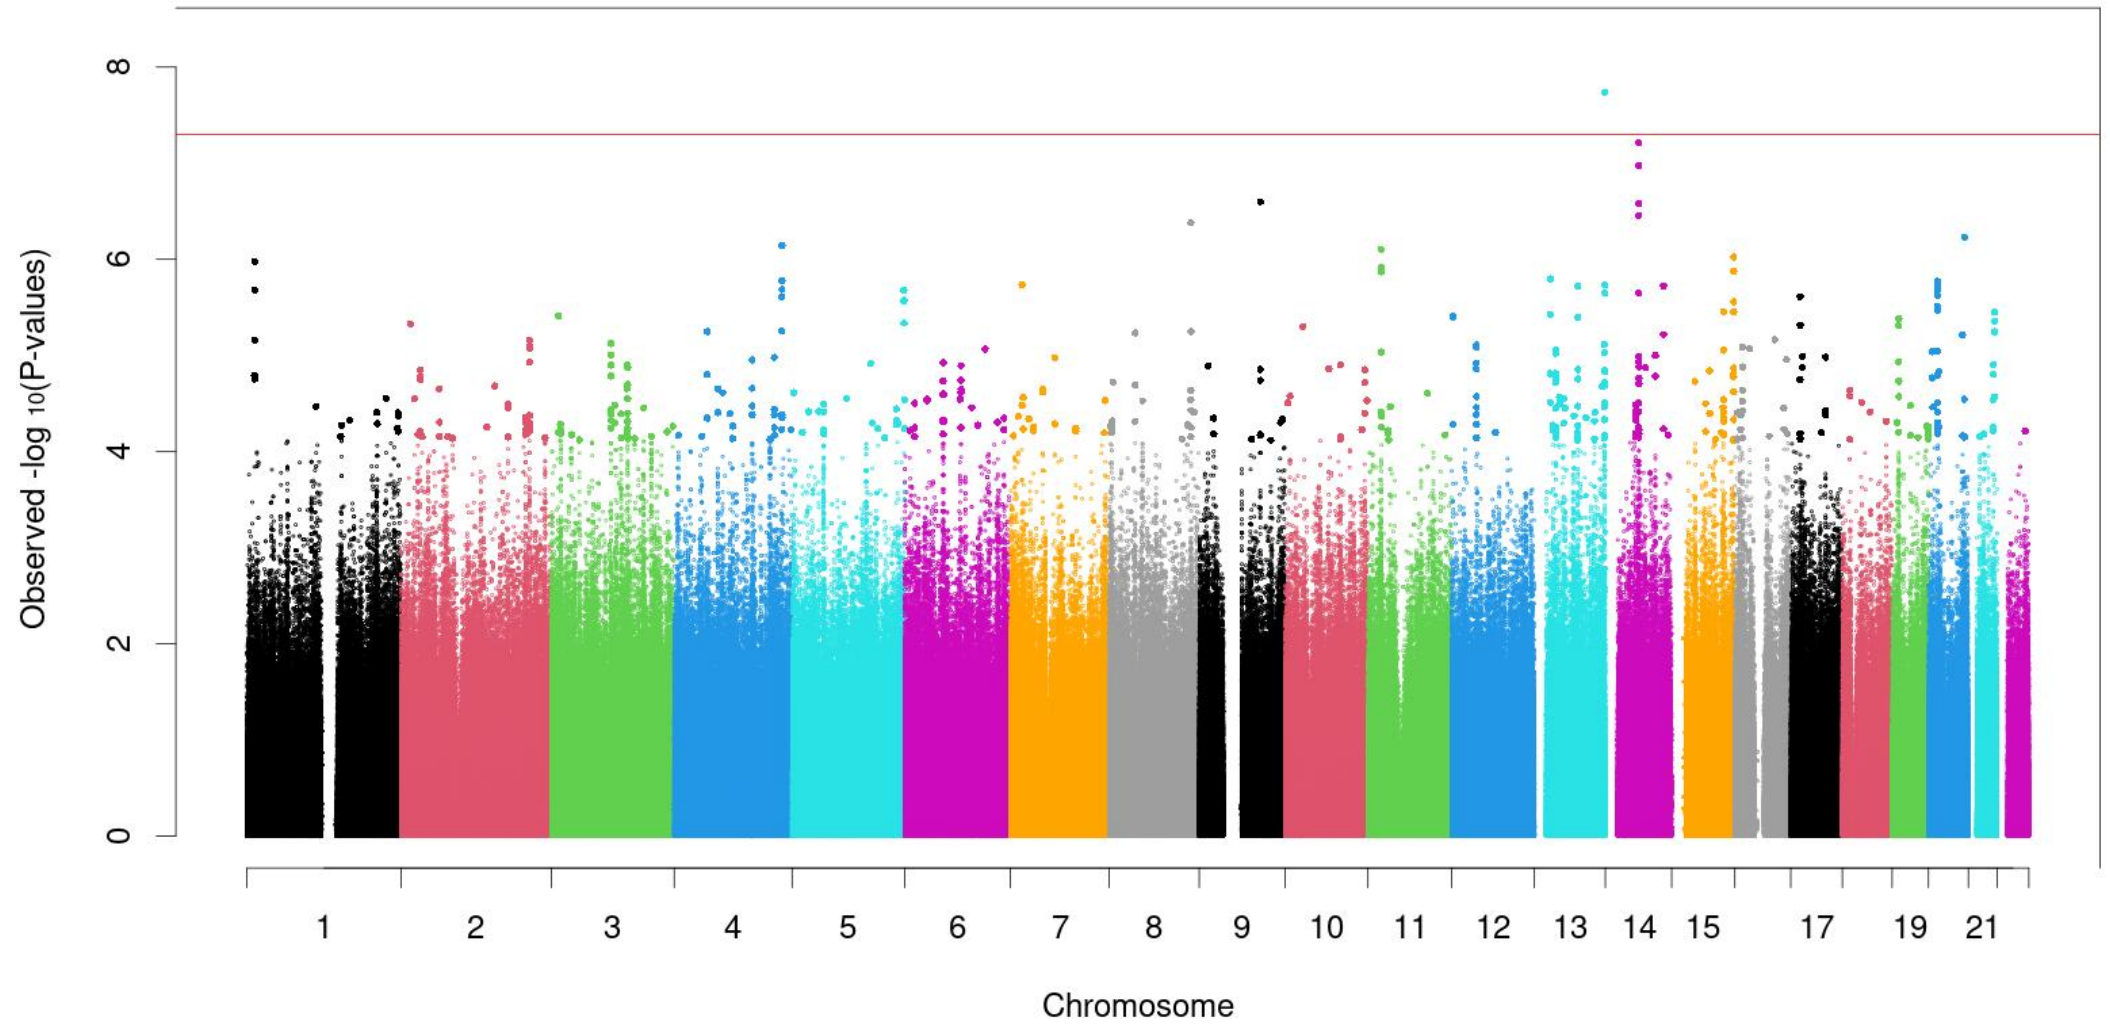

Manhattan plot for mz113.0347\_t39.3, uracil

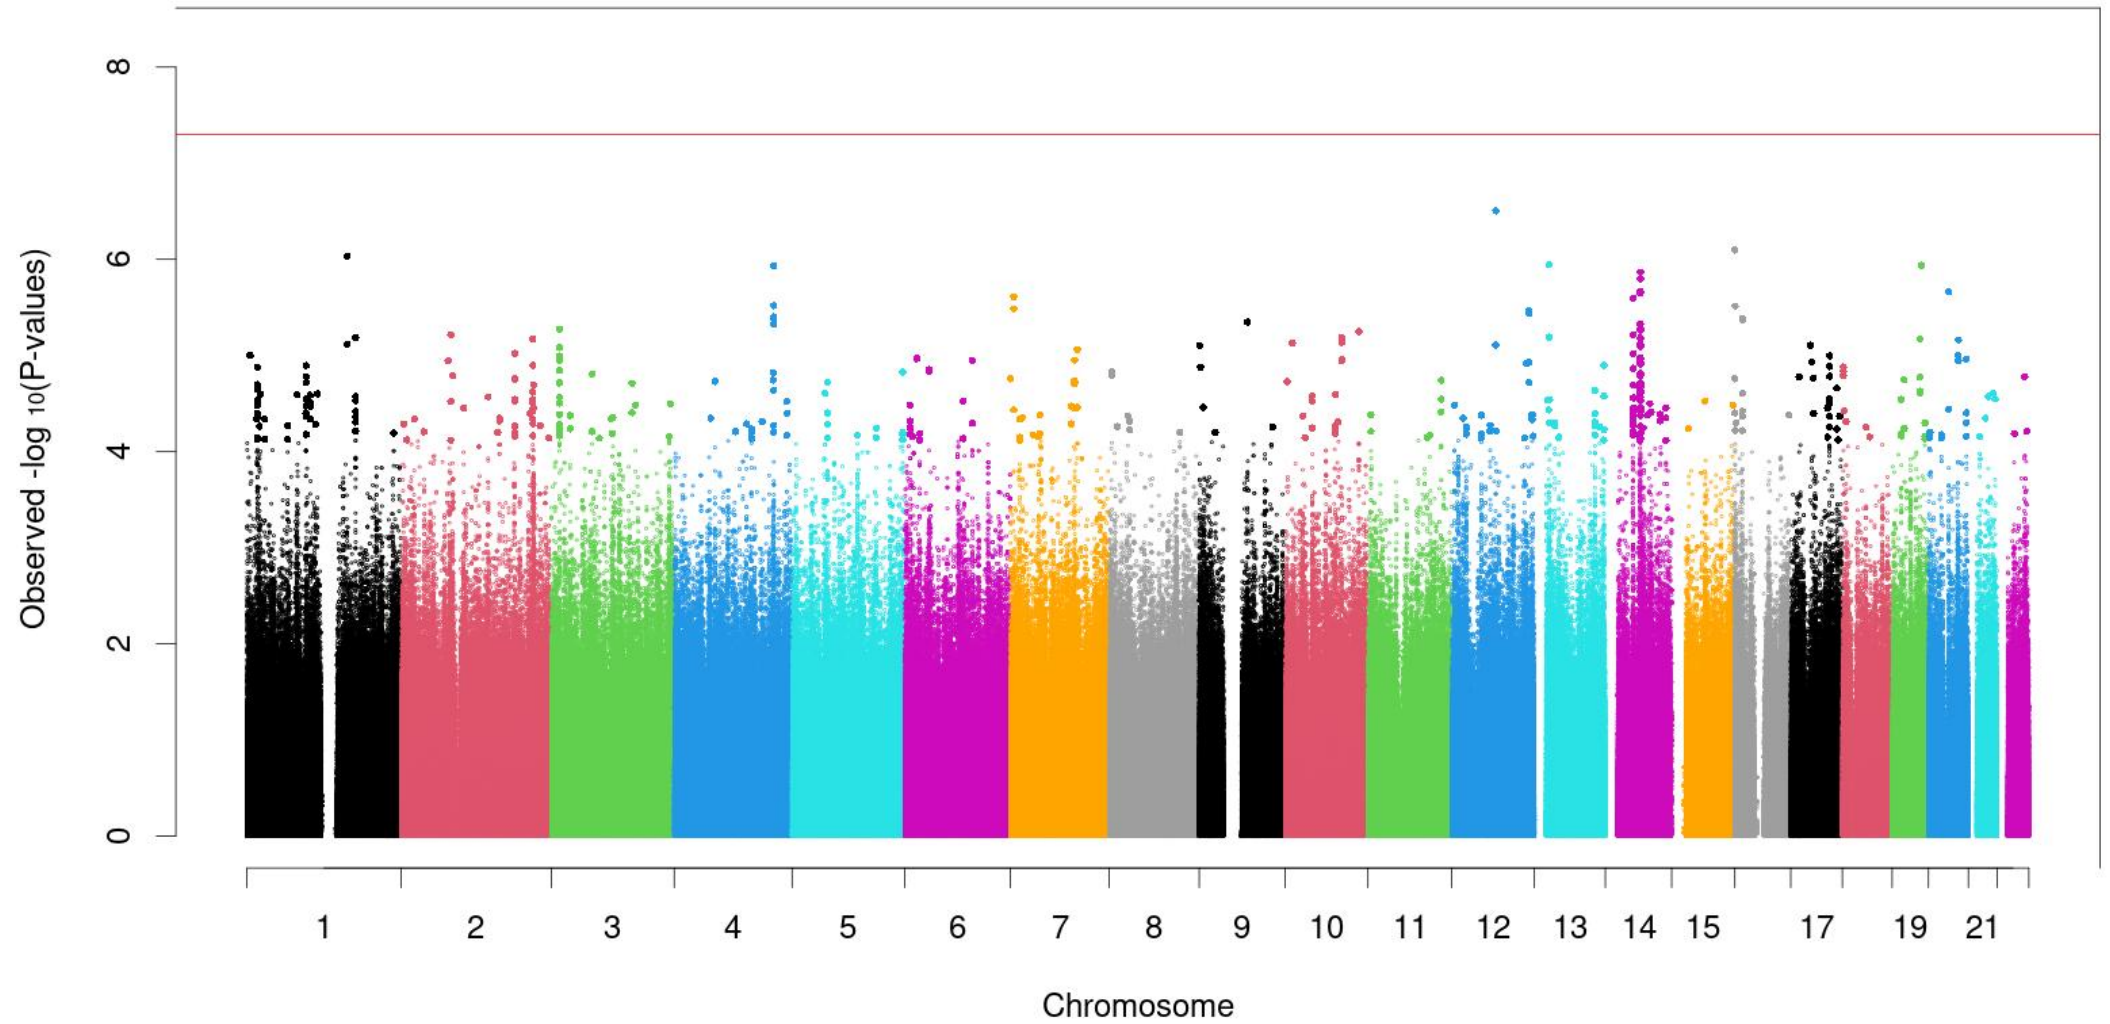



Manhattan plot for mz113.0597\_t29.2, sorbate

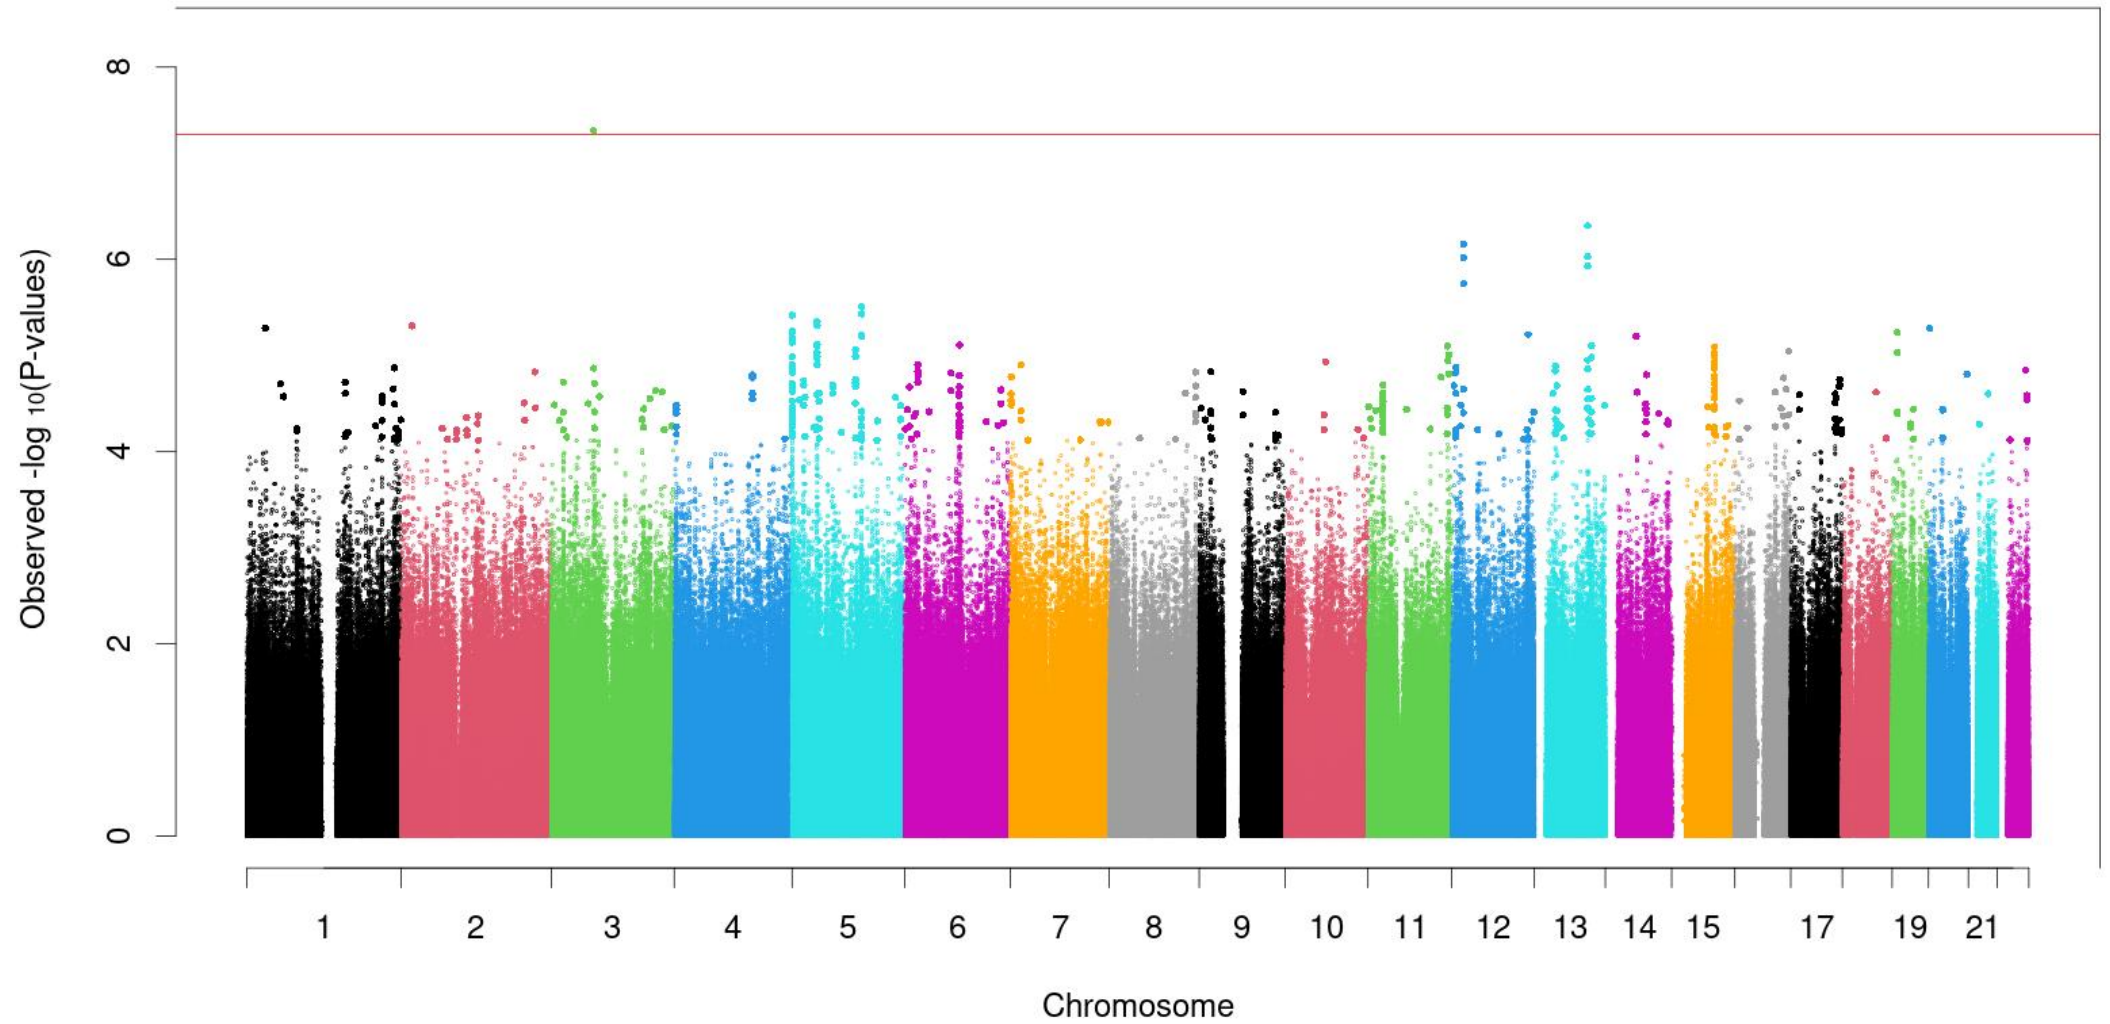



Manhattan plot for mz114.0661\_t40.7, creatinine

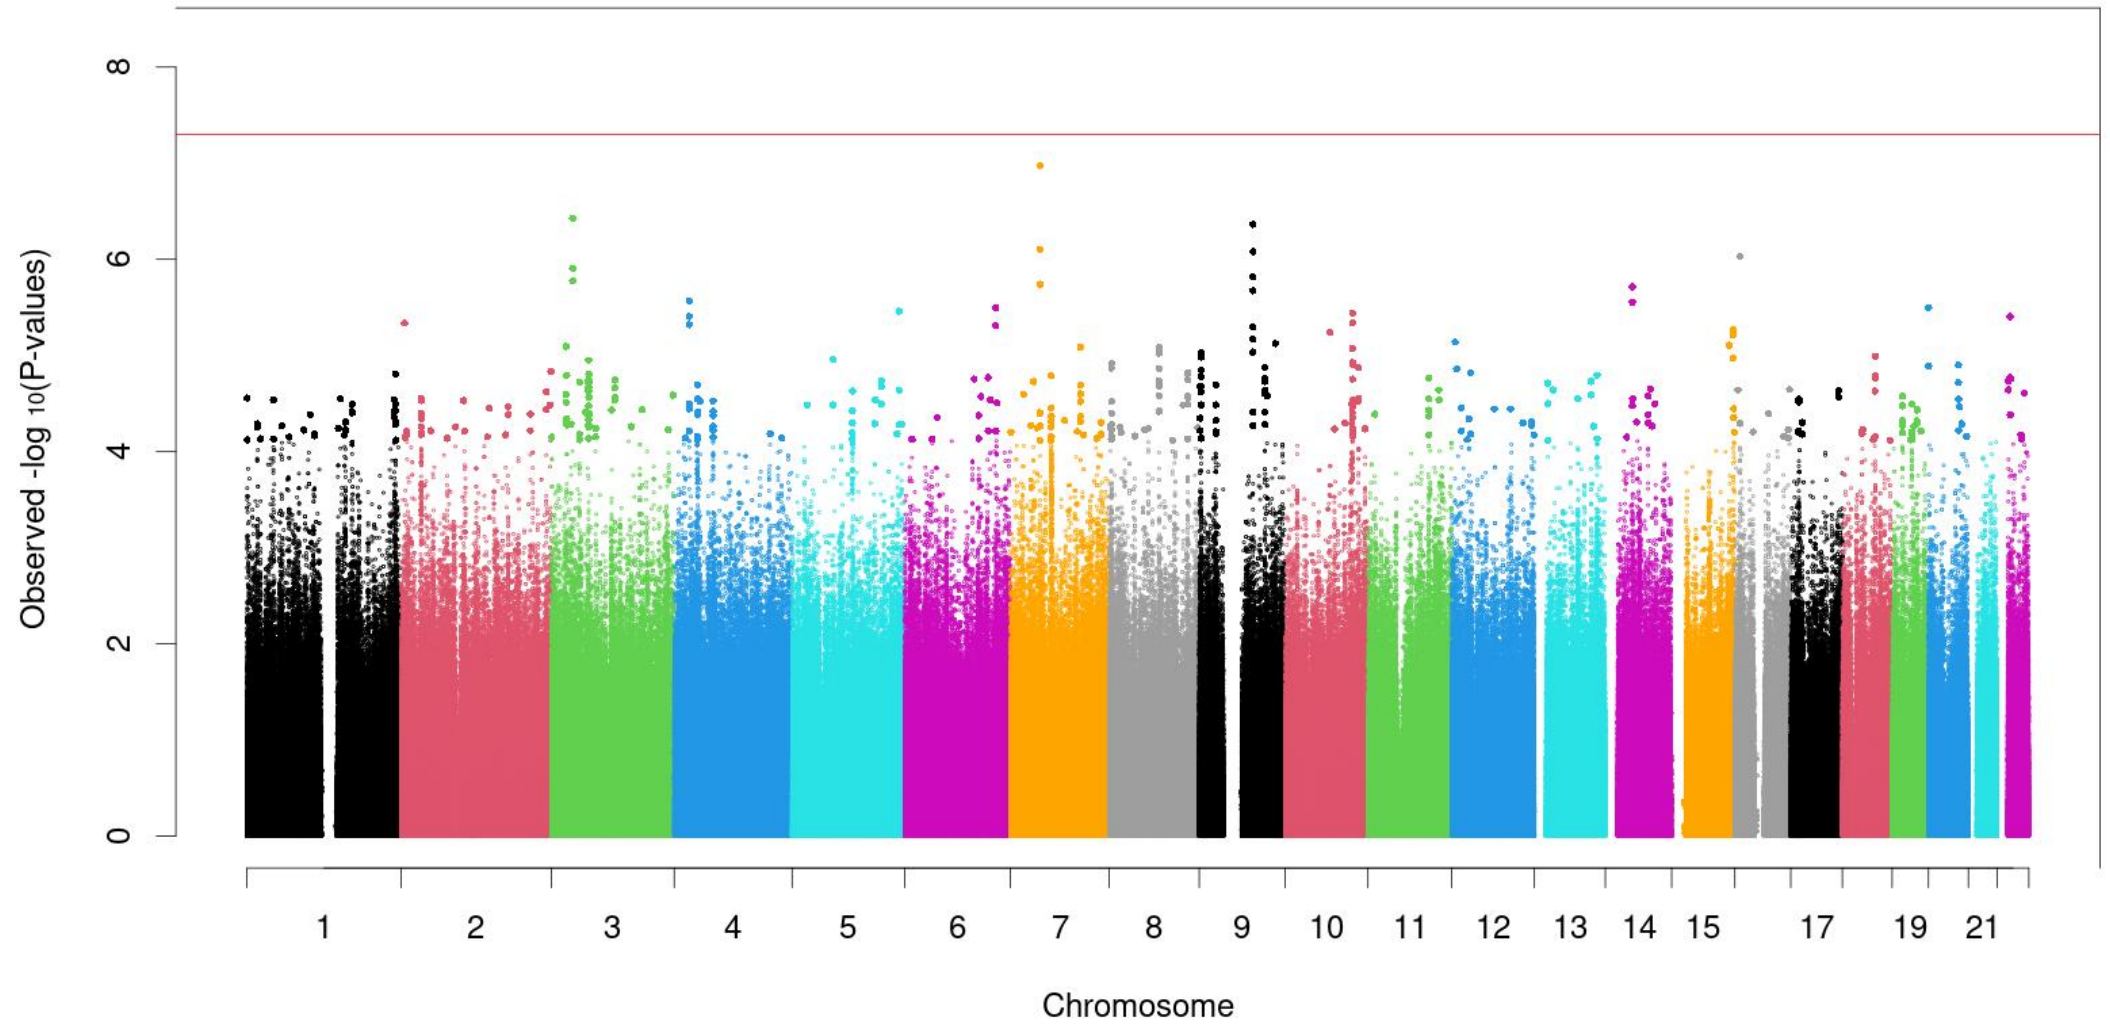

Manhattan plot for mz116.0343\_t85.6, maleamate

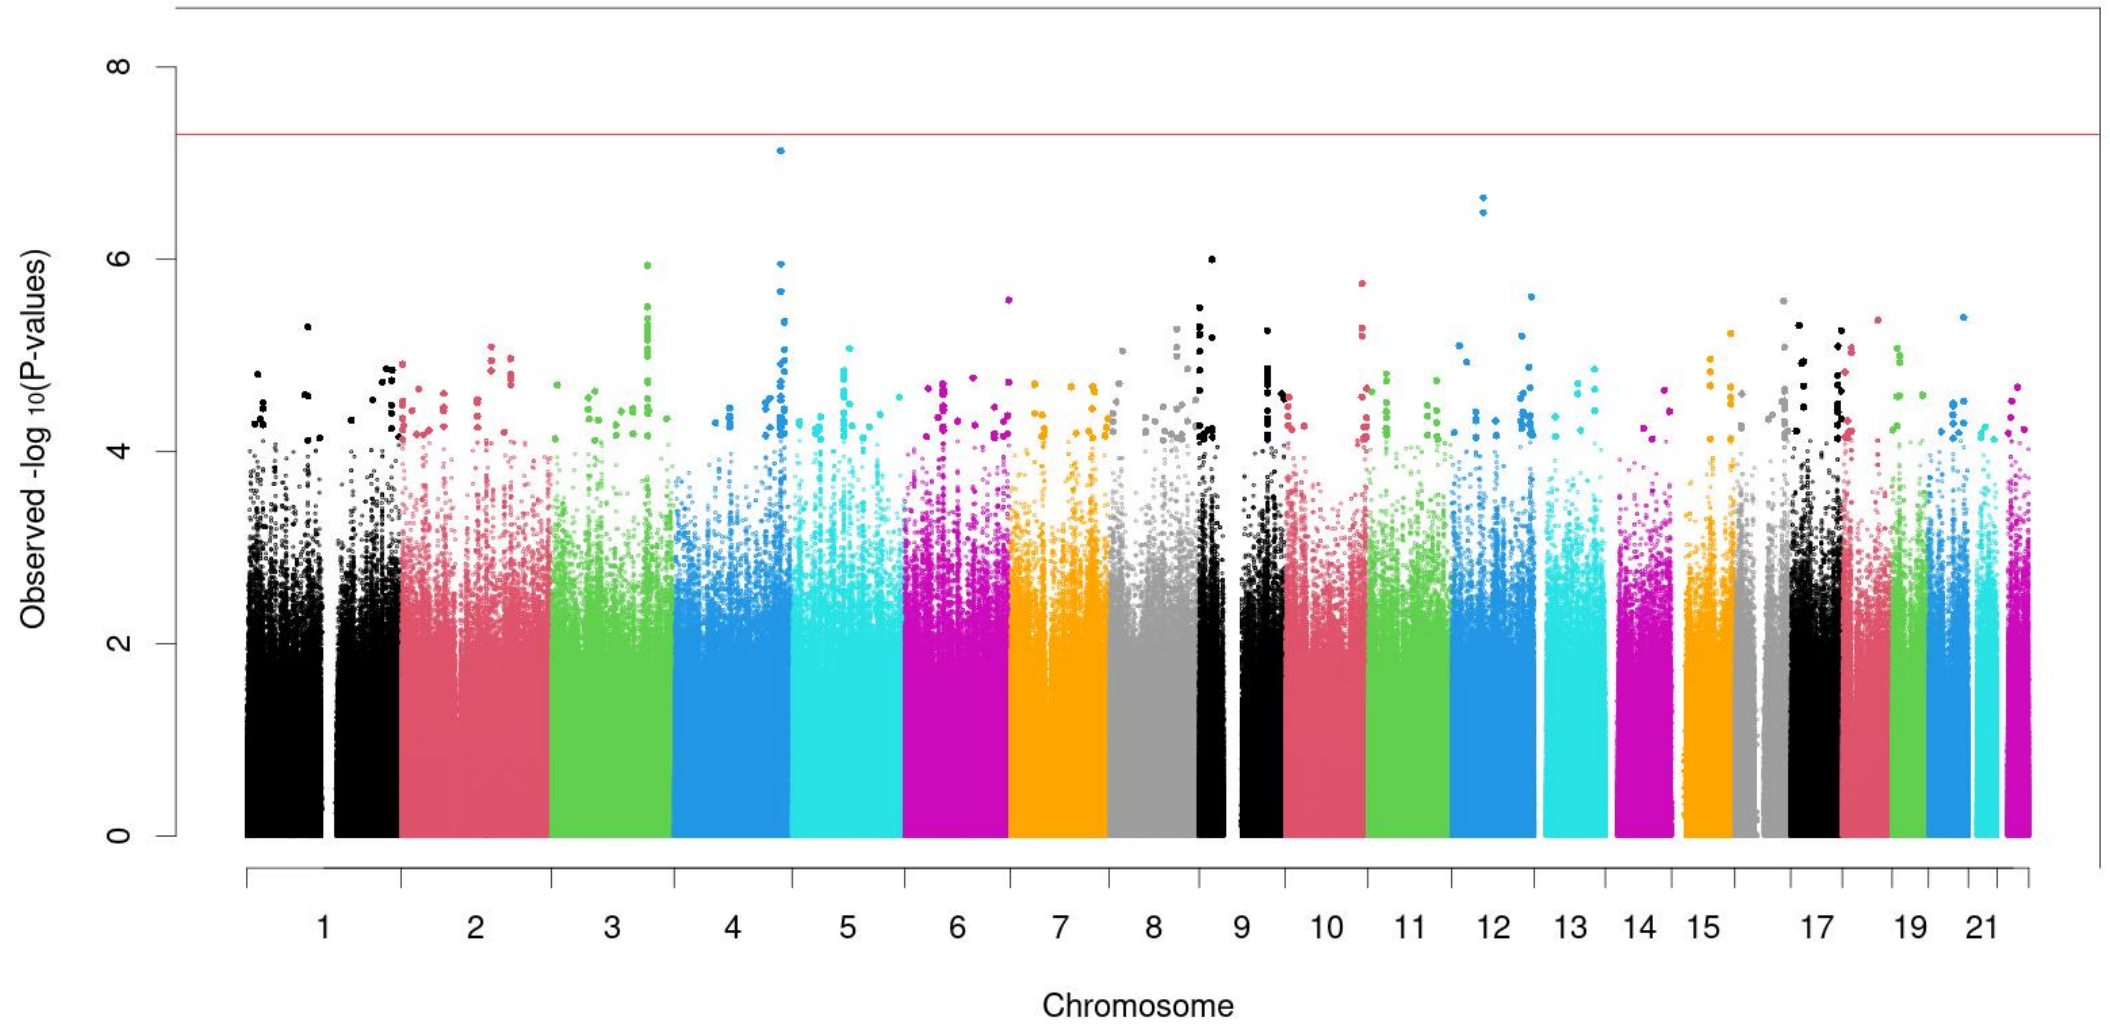

Manhattan plot for mz116.0707\_t58, proline

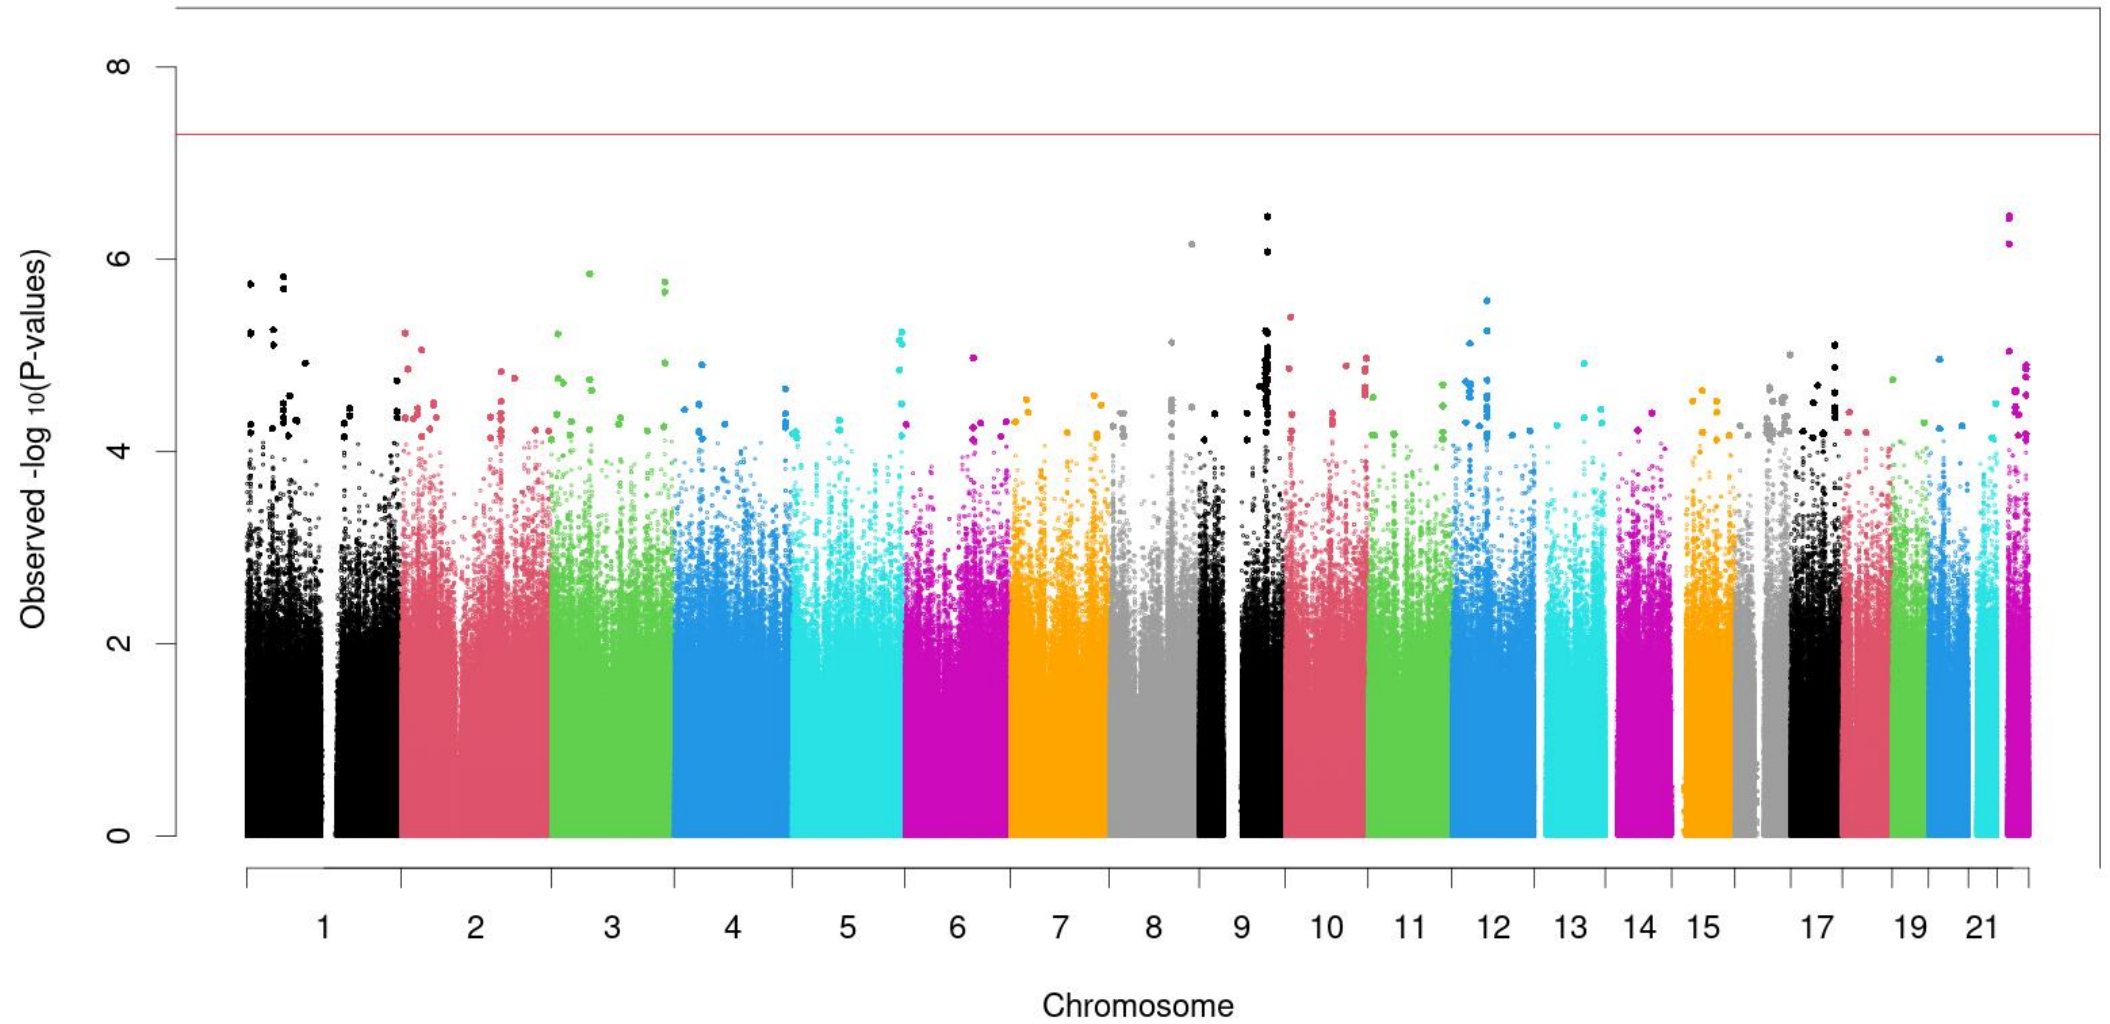



Manhattan plot for mz116.0716\_t21.8, 5-aminopentanoate

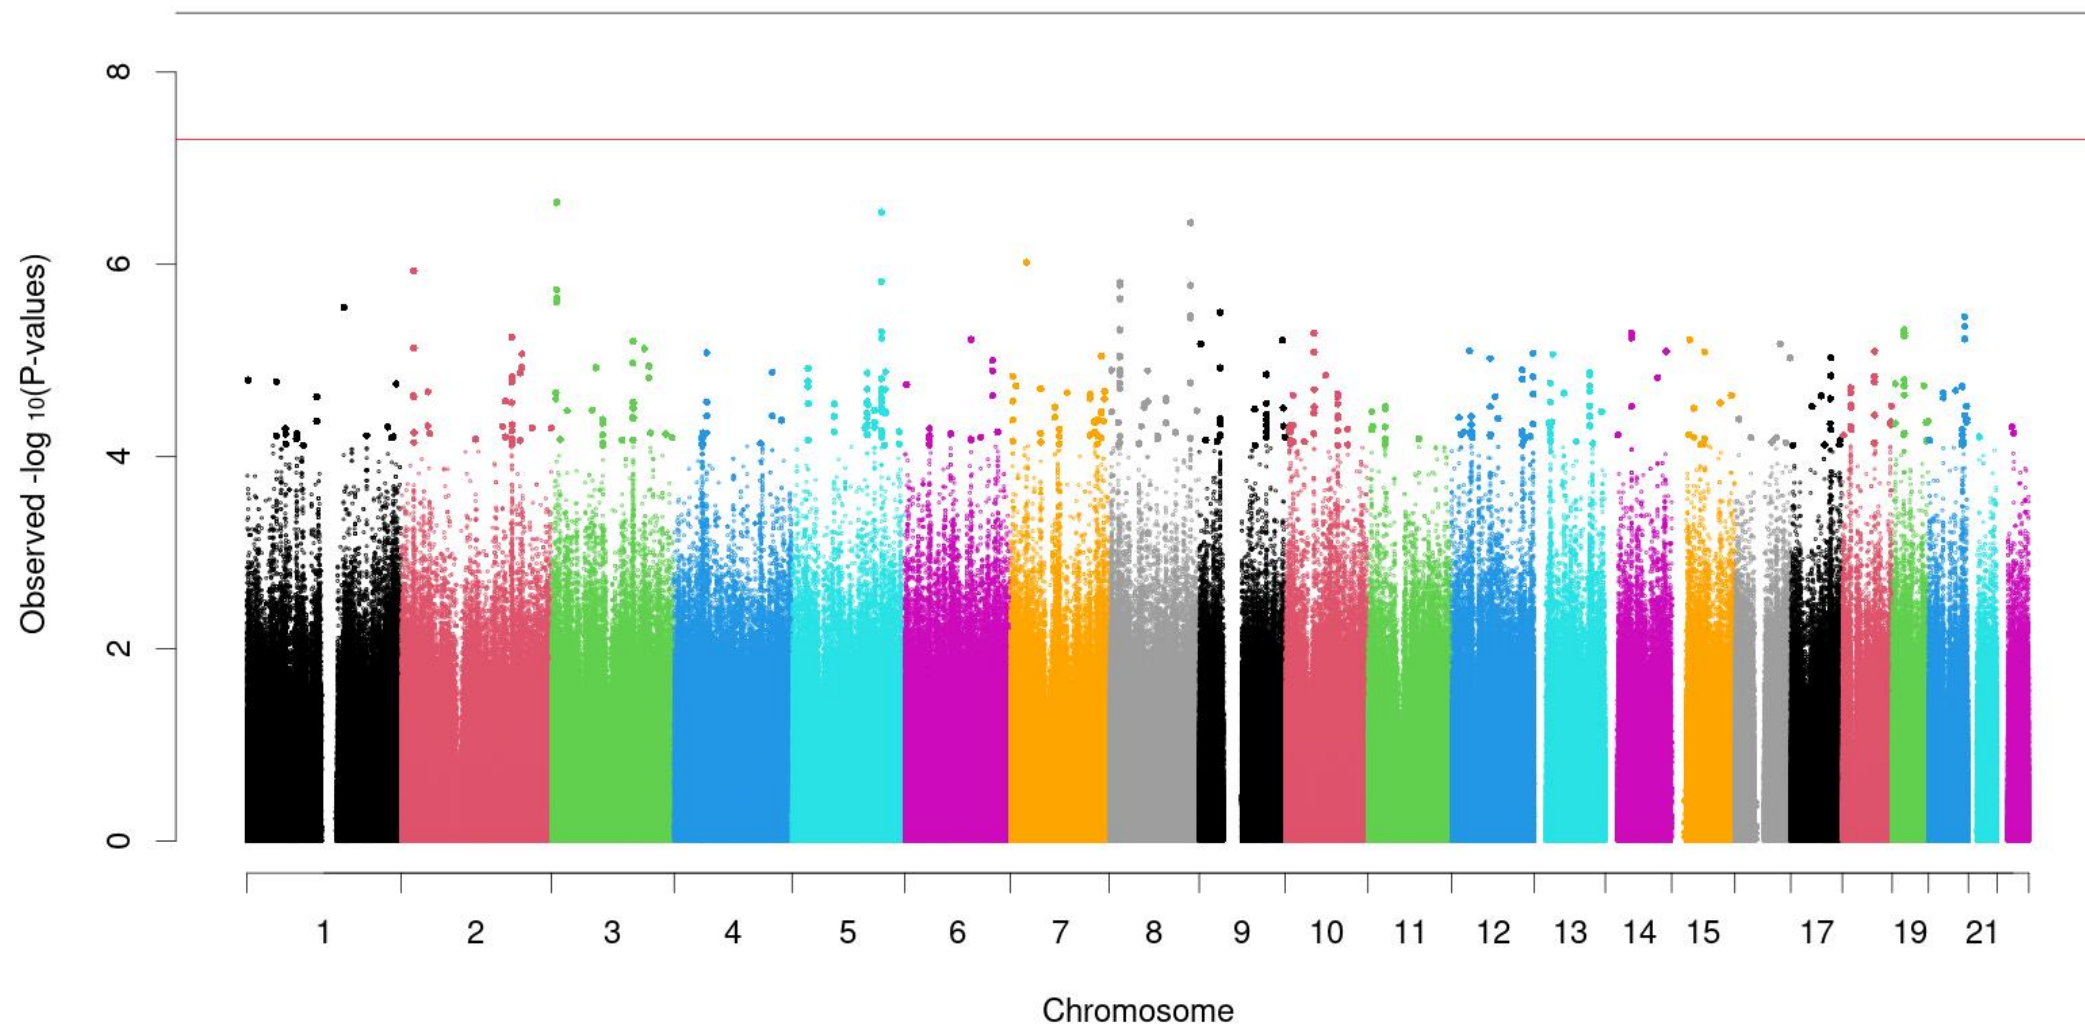

Manhattan plot for mz118.0612\_t73.1, guanidinoacetate

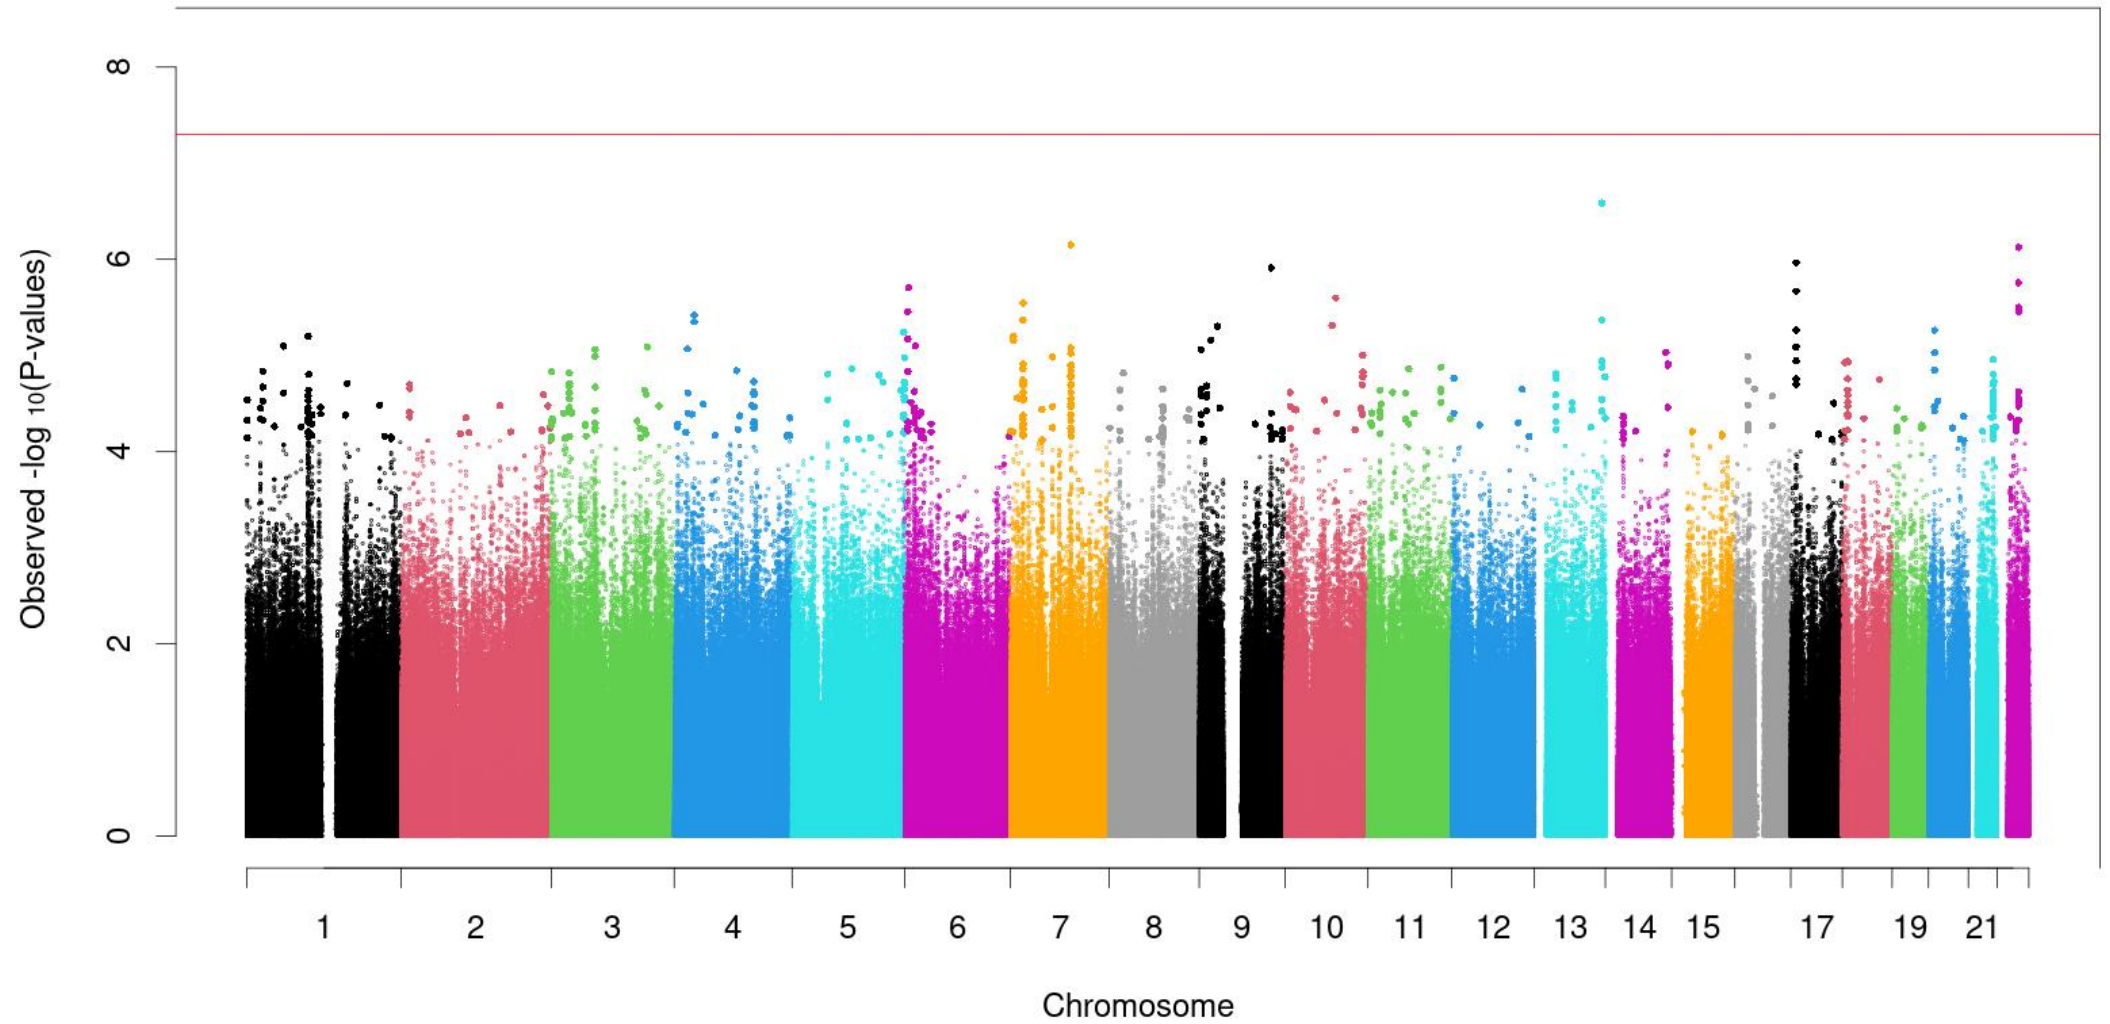

Manhattan plot for mz123.045\_t27.4, 3-hydroxybenzyl alcohol

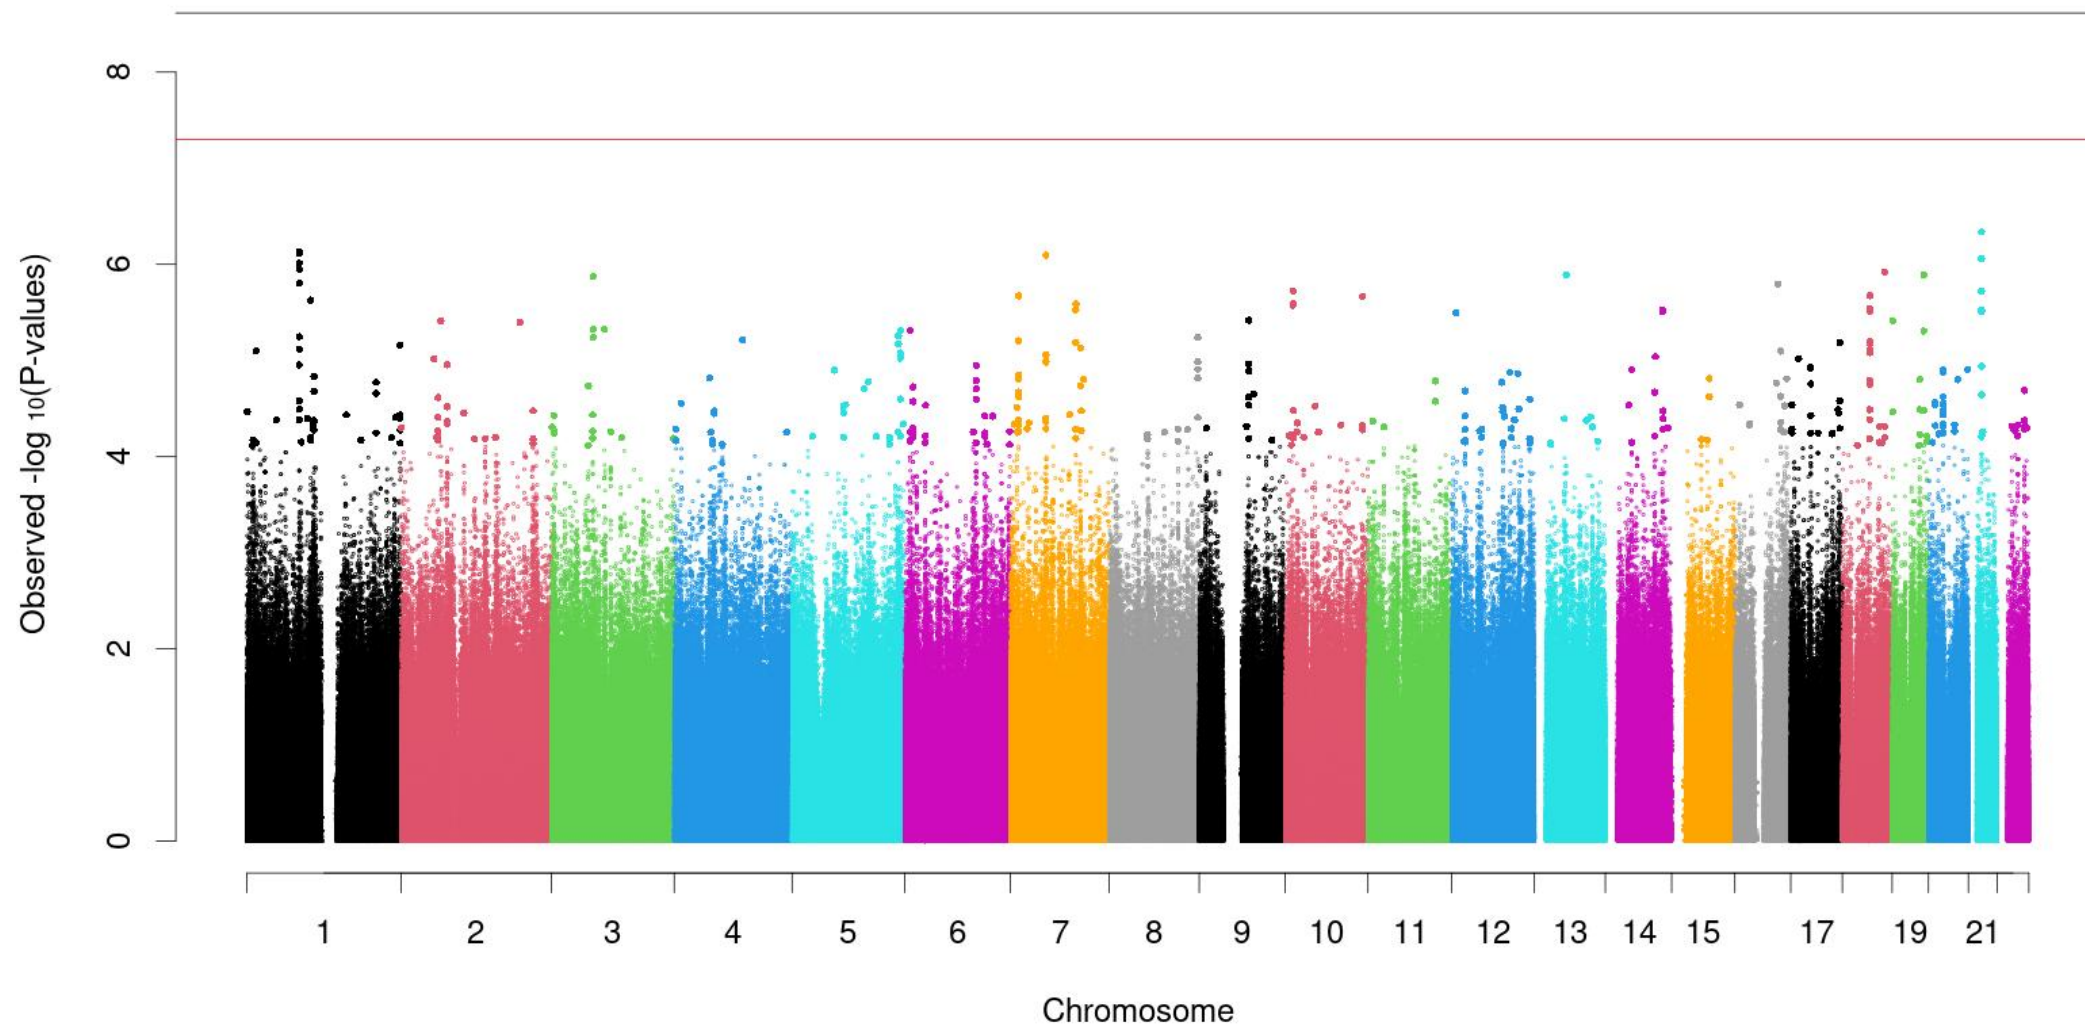



Manhattan plot for mz123.0441\_t56.2, 3-hydroxybenzaldehyde

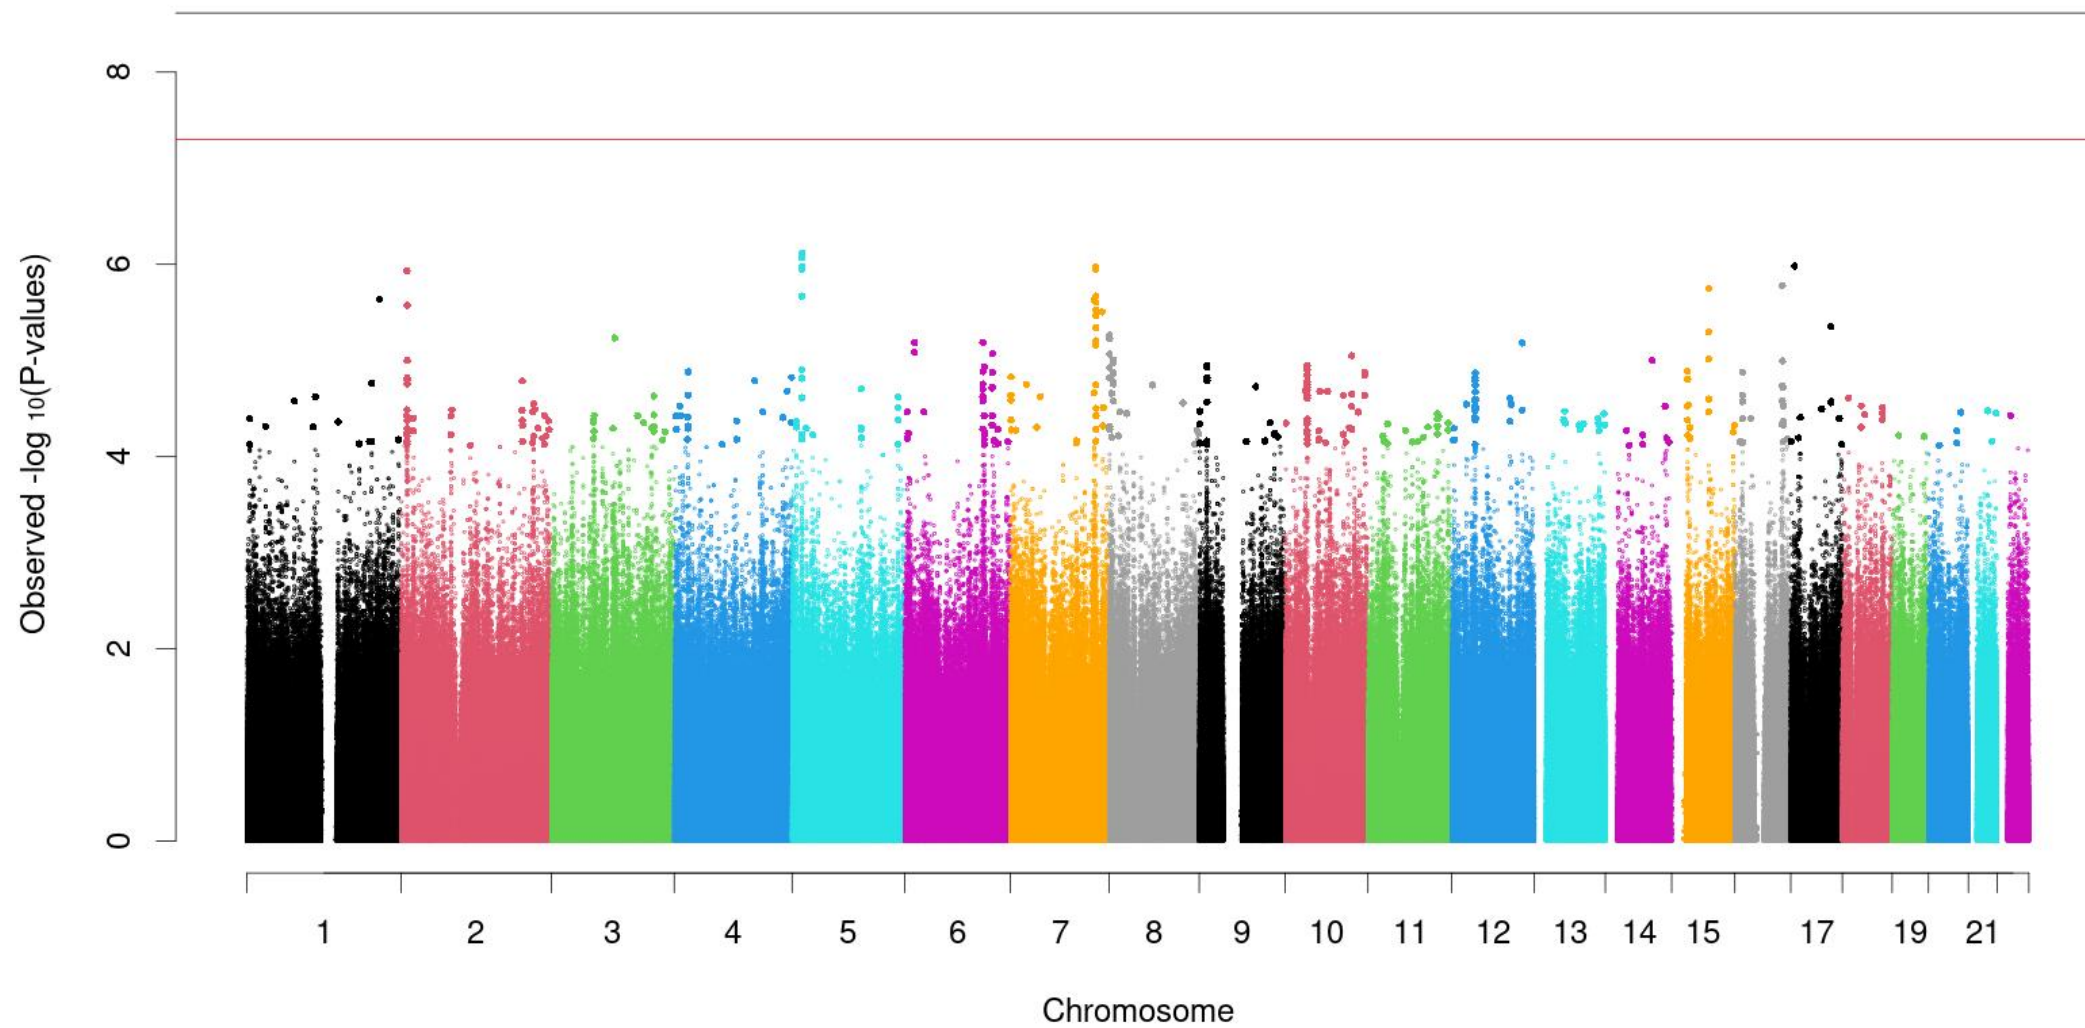

Manhattan plot for mz123.0552\_t32.2, nicotinamide

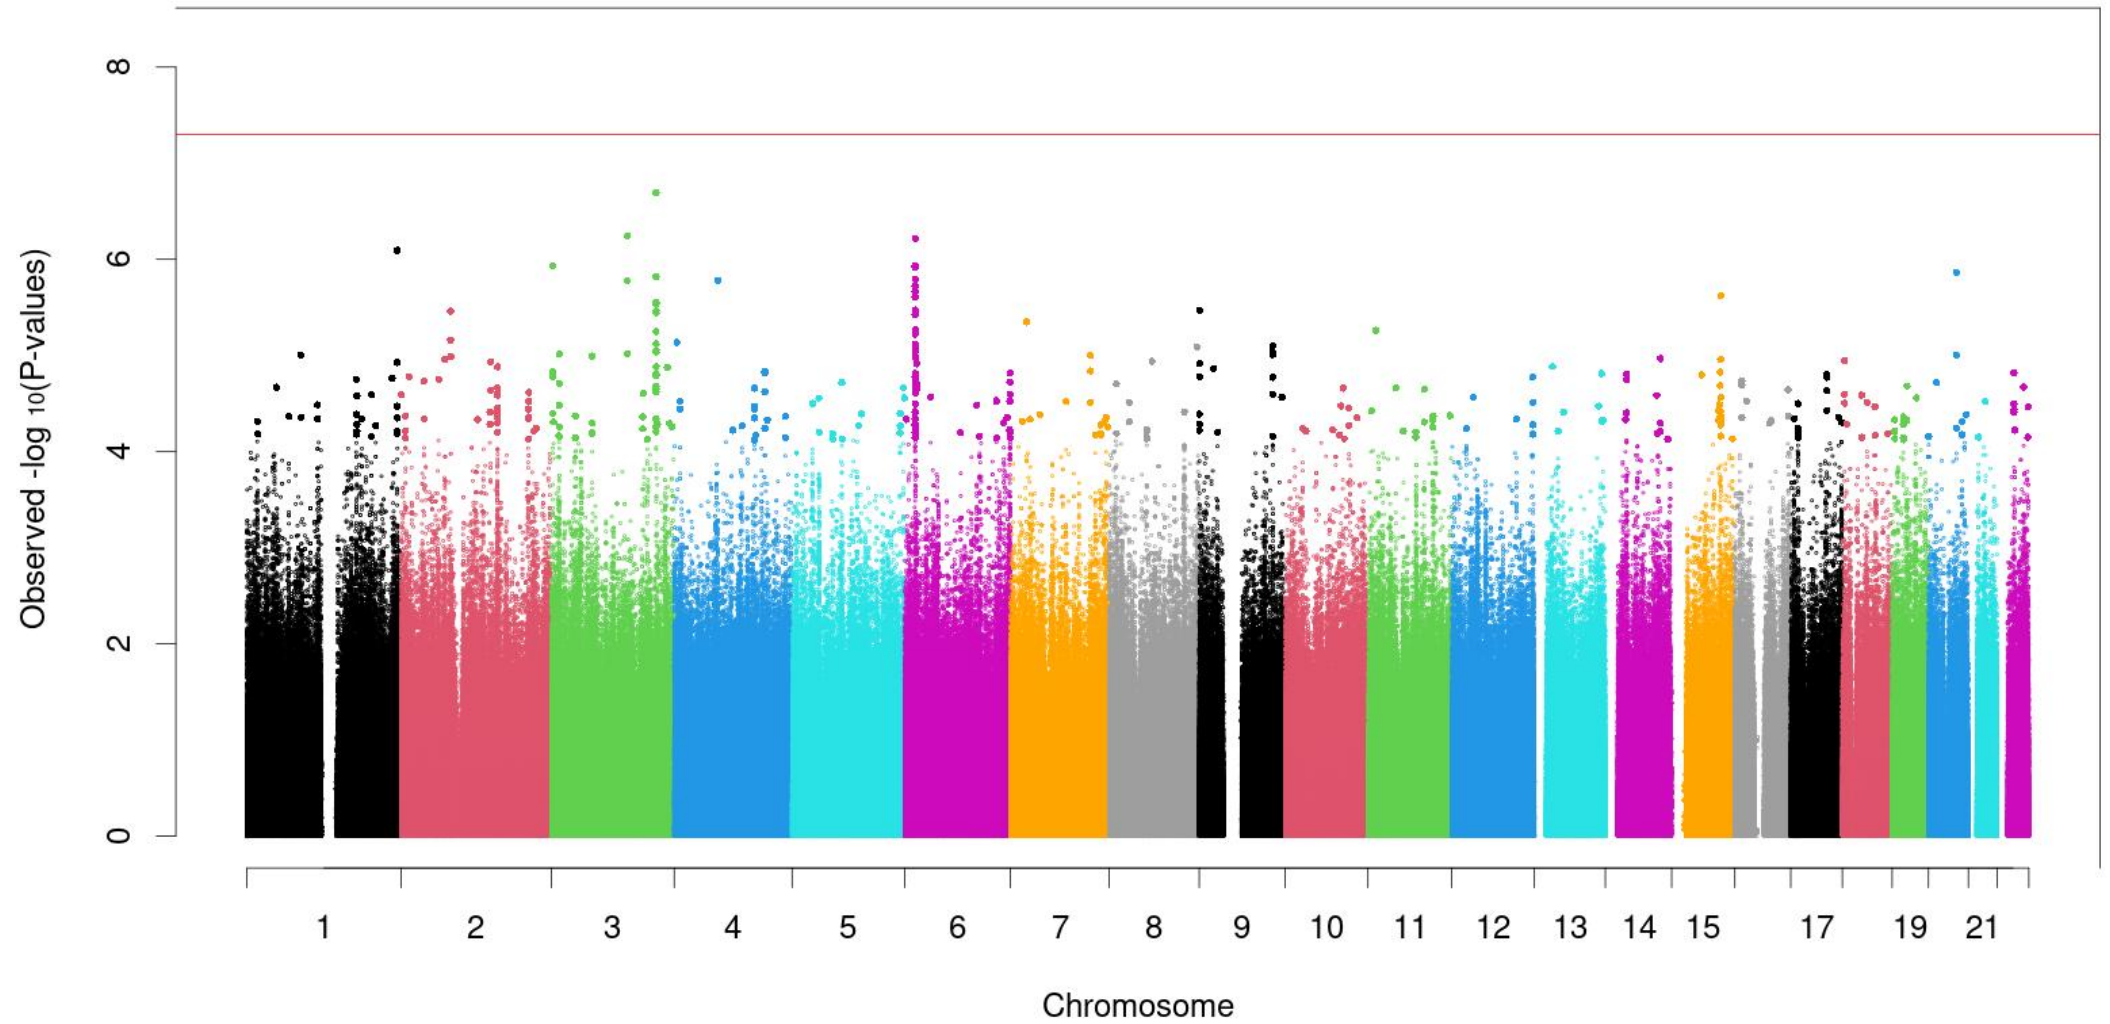

Manhattan plot for mz126.022\_t55.6, taurine

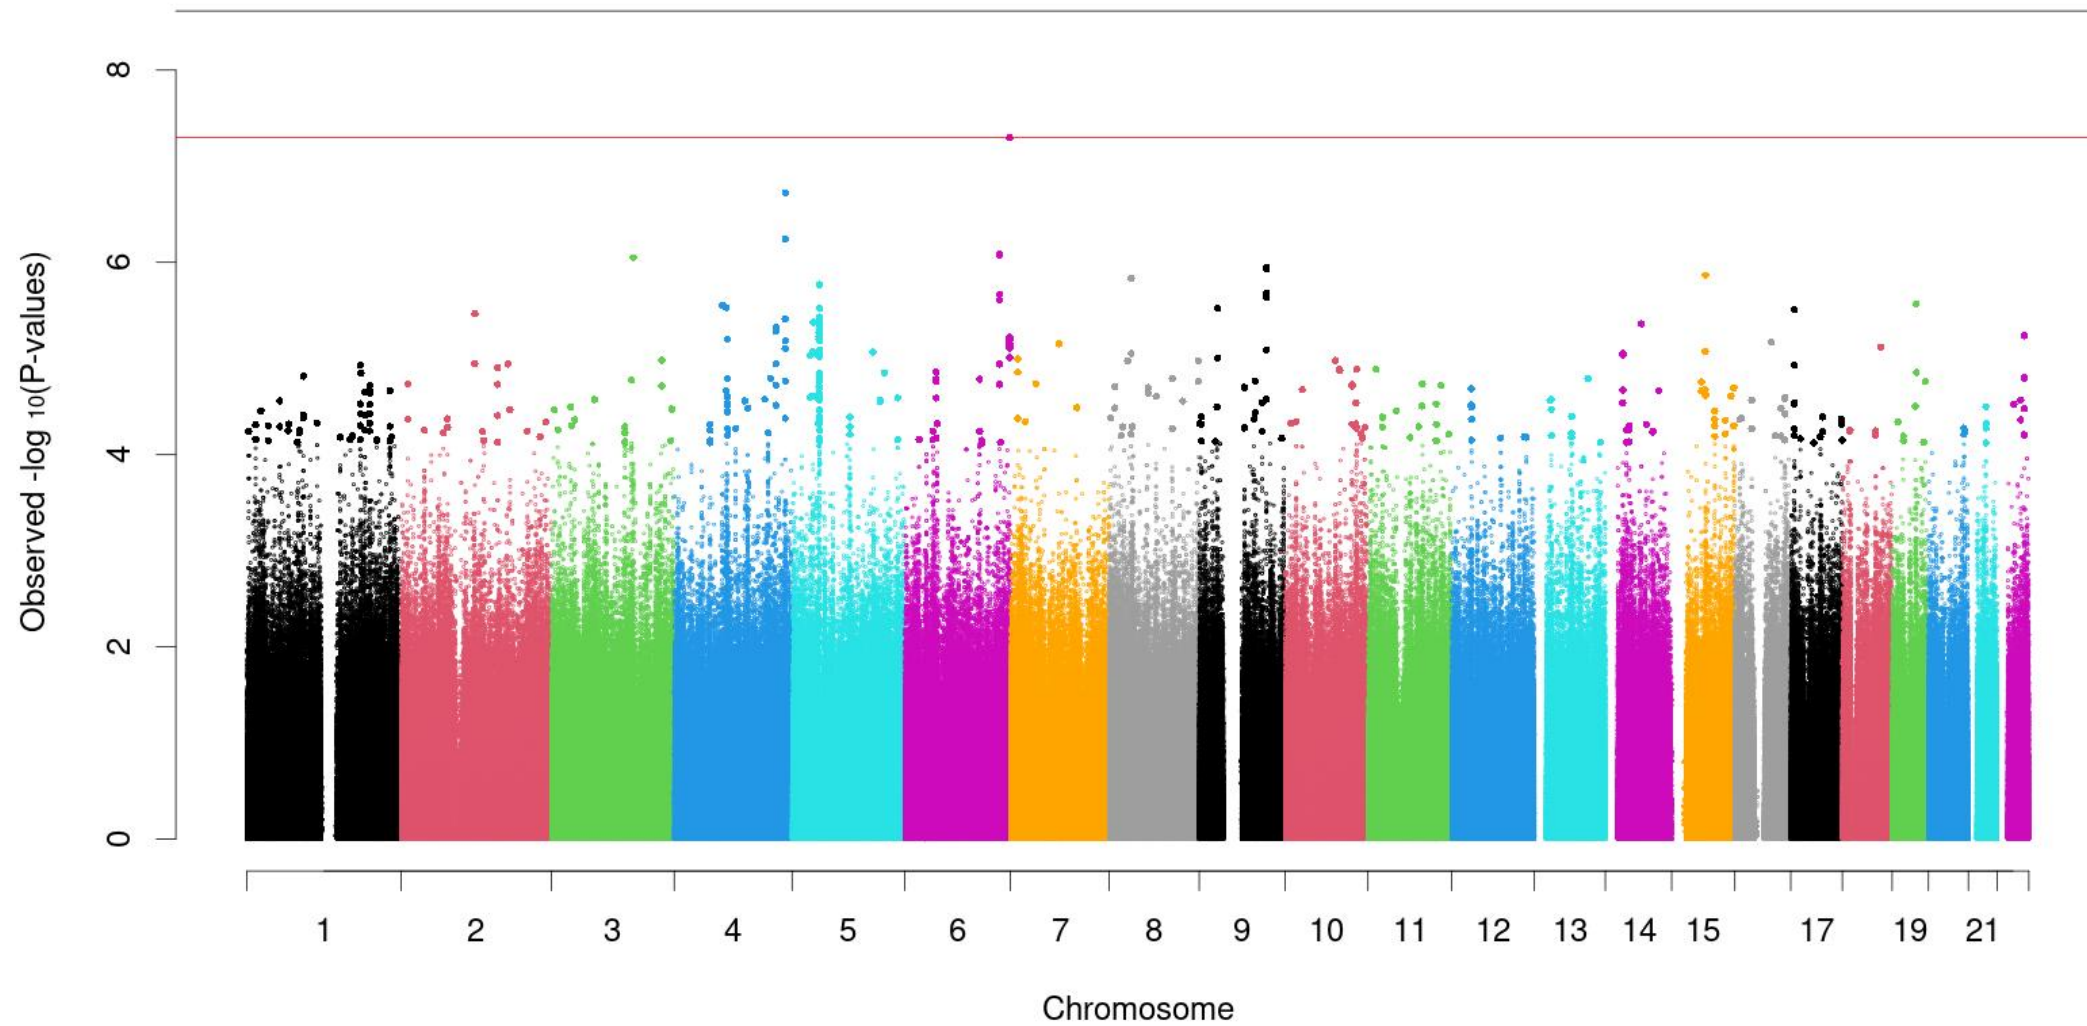



Manhattan plot for mz127.0503\_t70.4, 4-imidazoleacetic acid

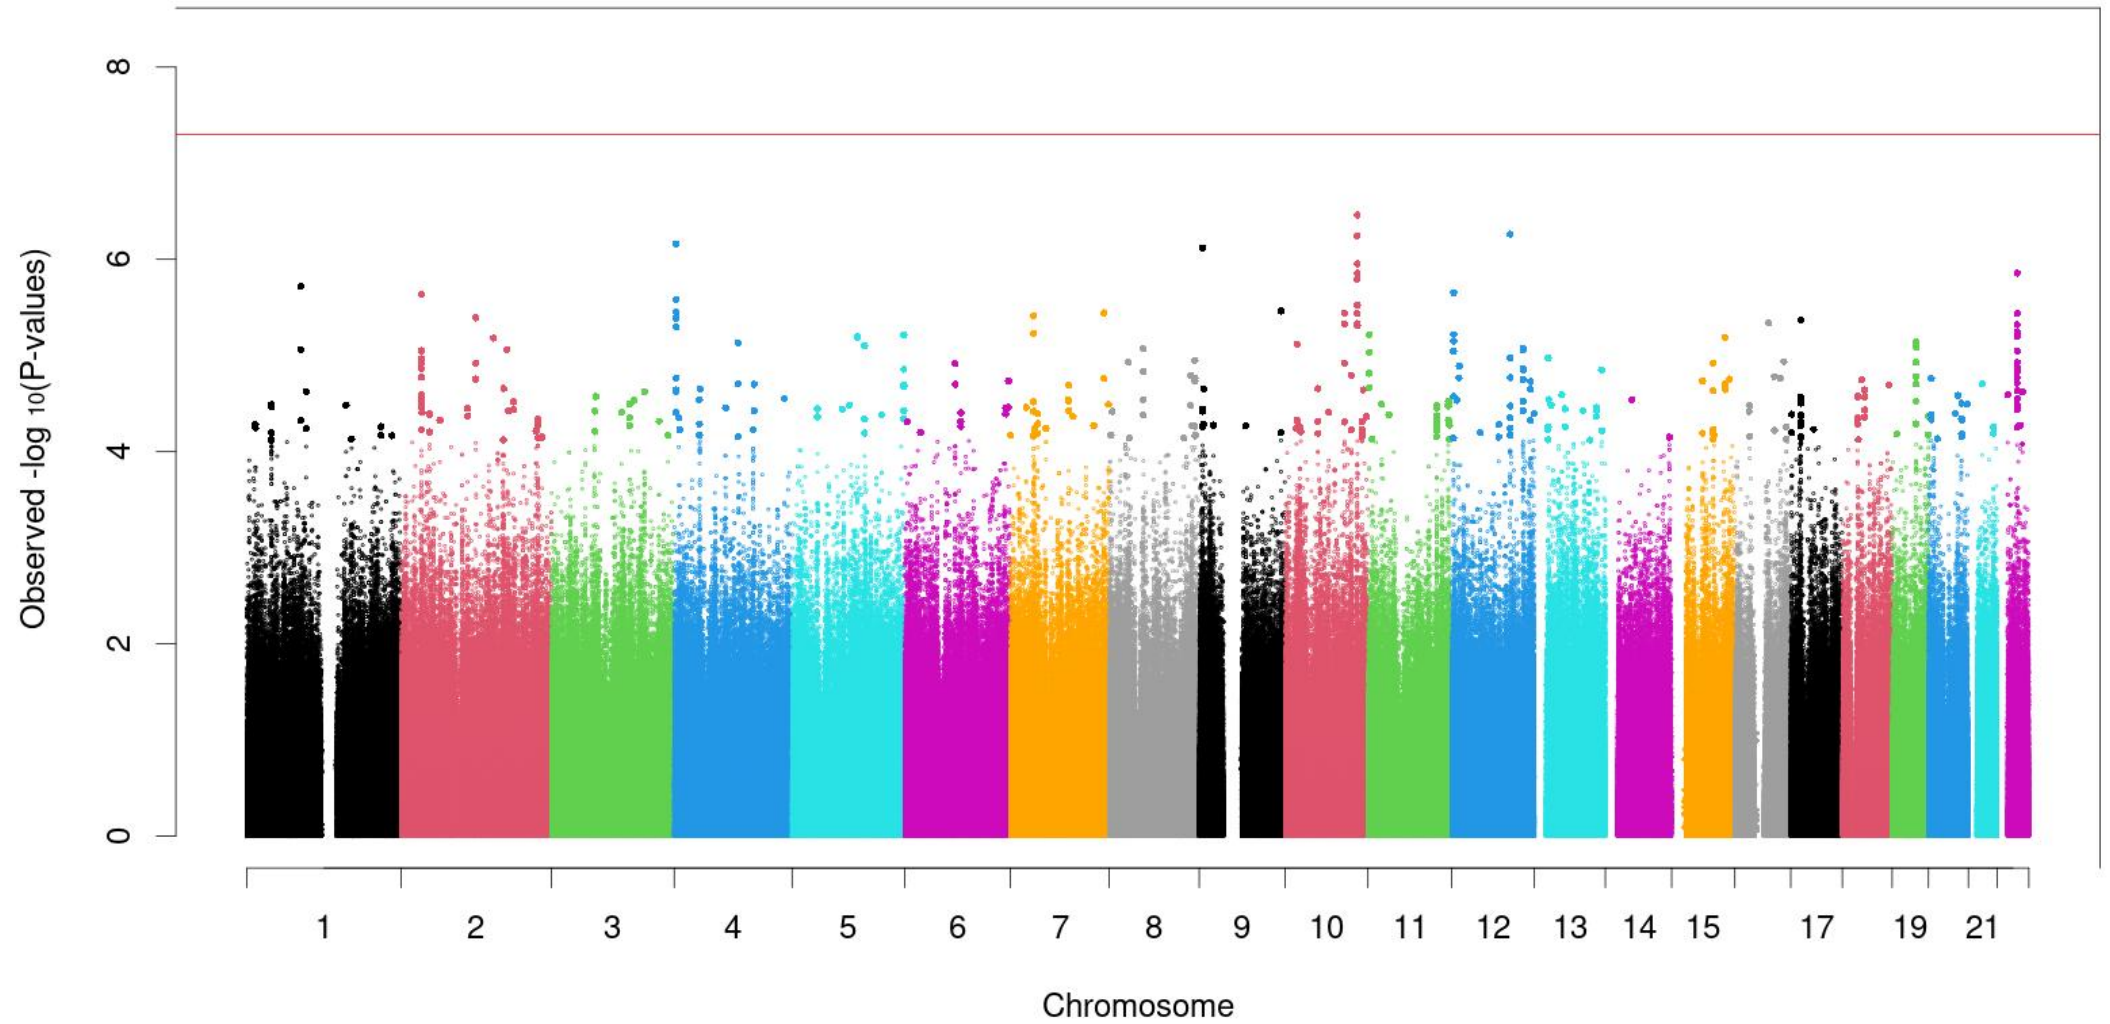

Manhattan plot for mz130.0863\_t52.9, pipecolate

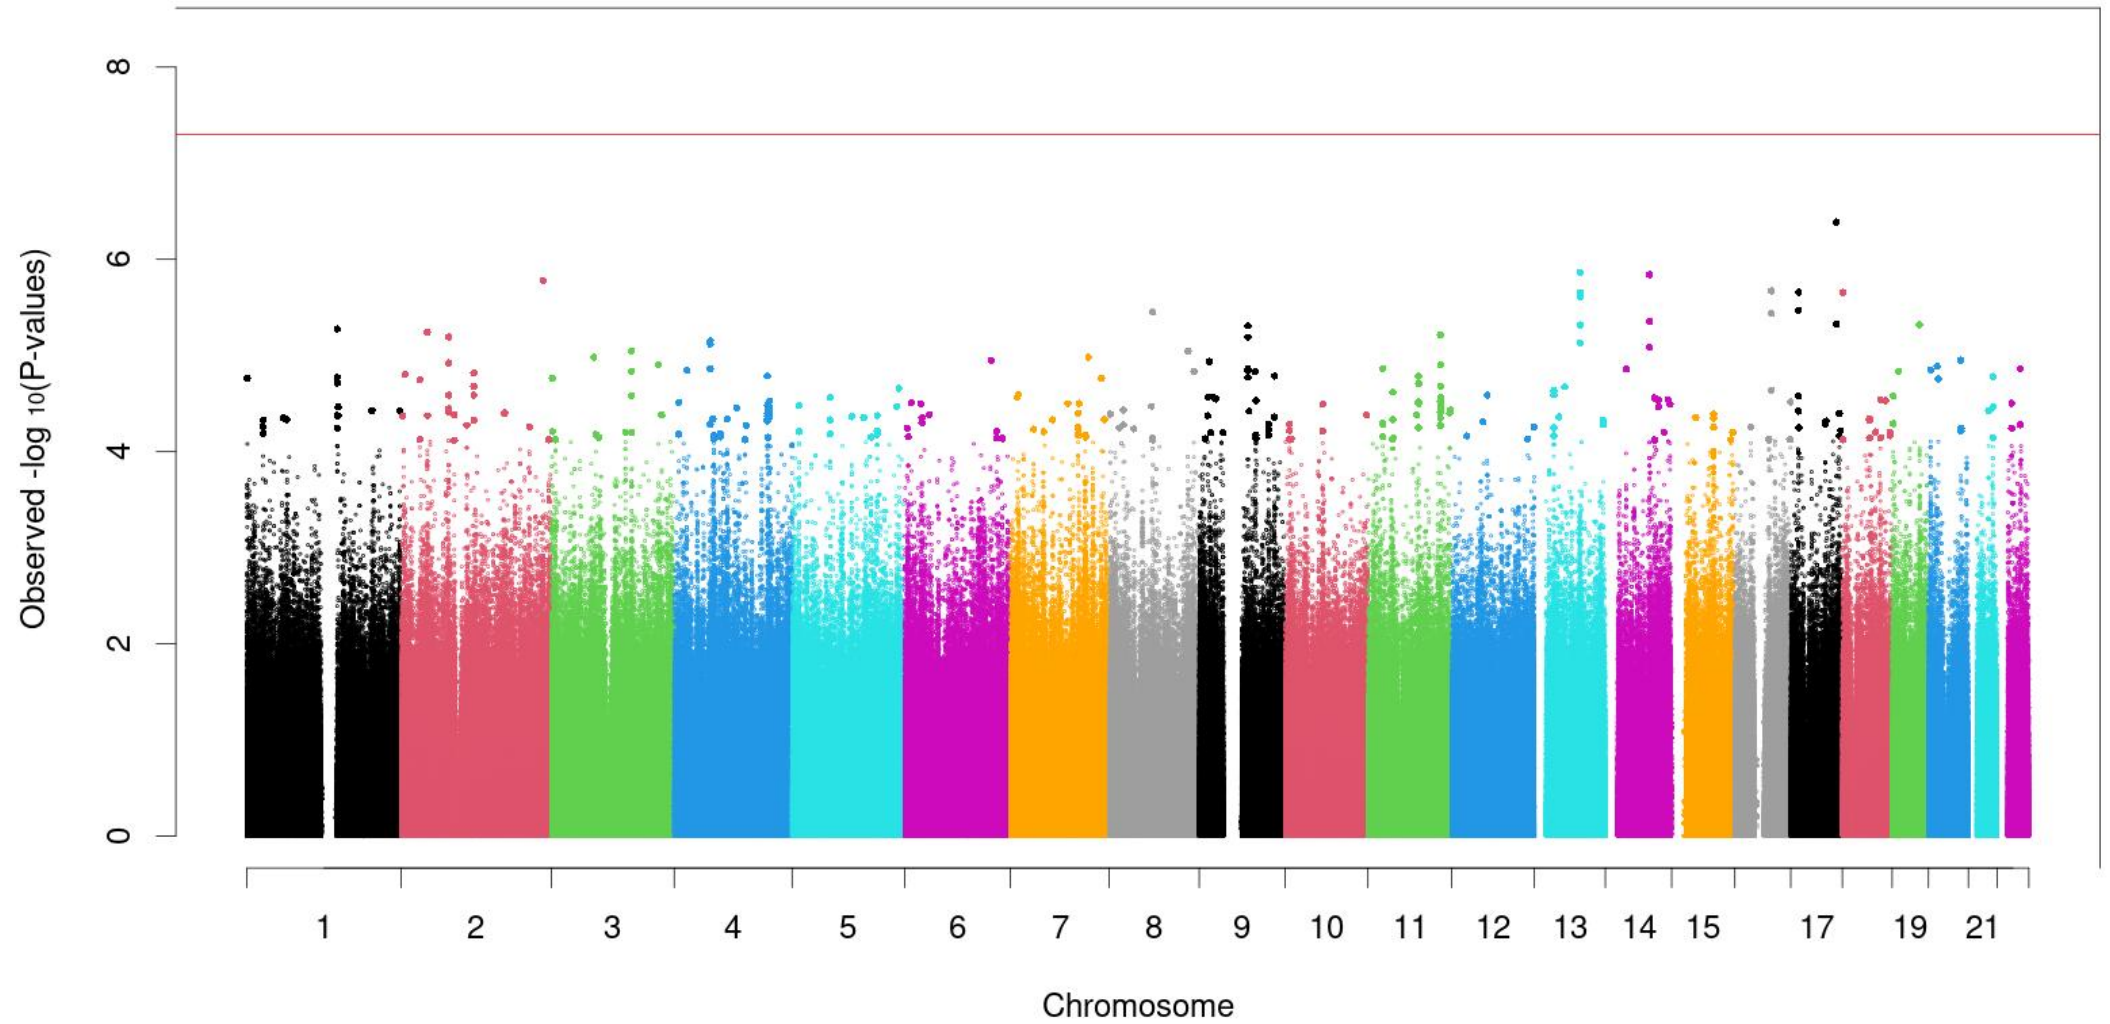

Manhattan plot for mz130.0873\_t23, norleucine

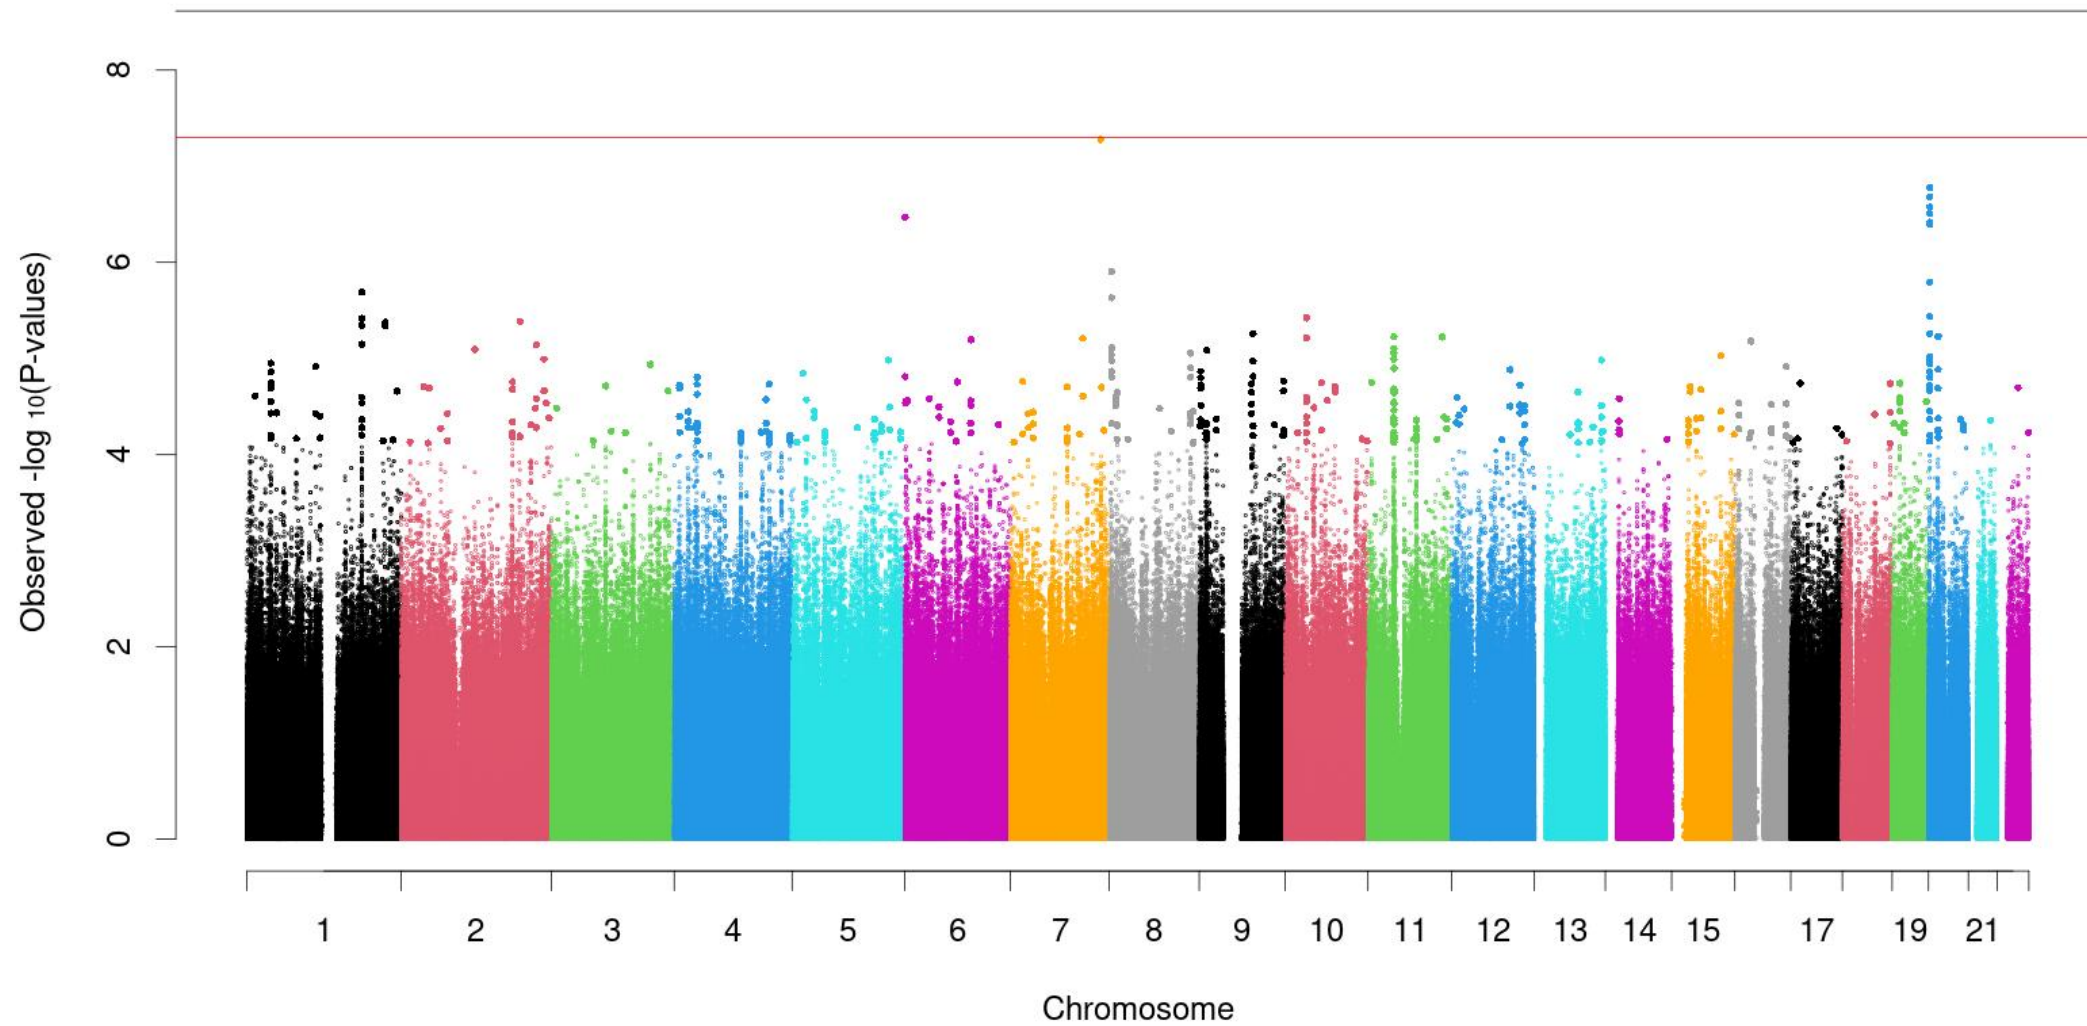



Manhattan plot for mz131.0459\_t20.7, 3-ureidopropionate

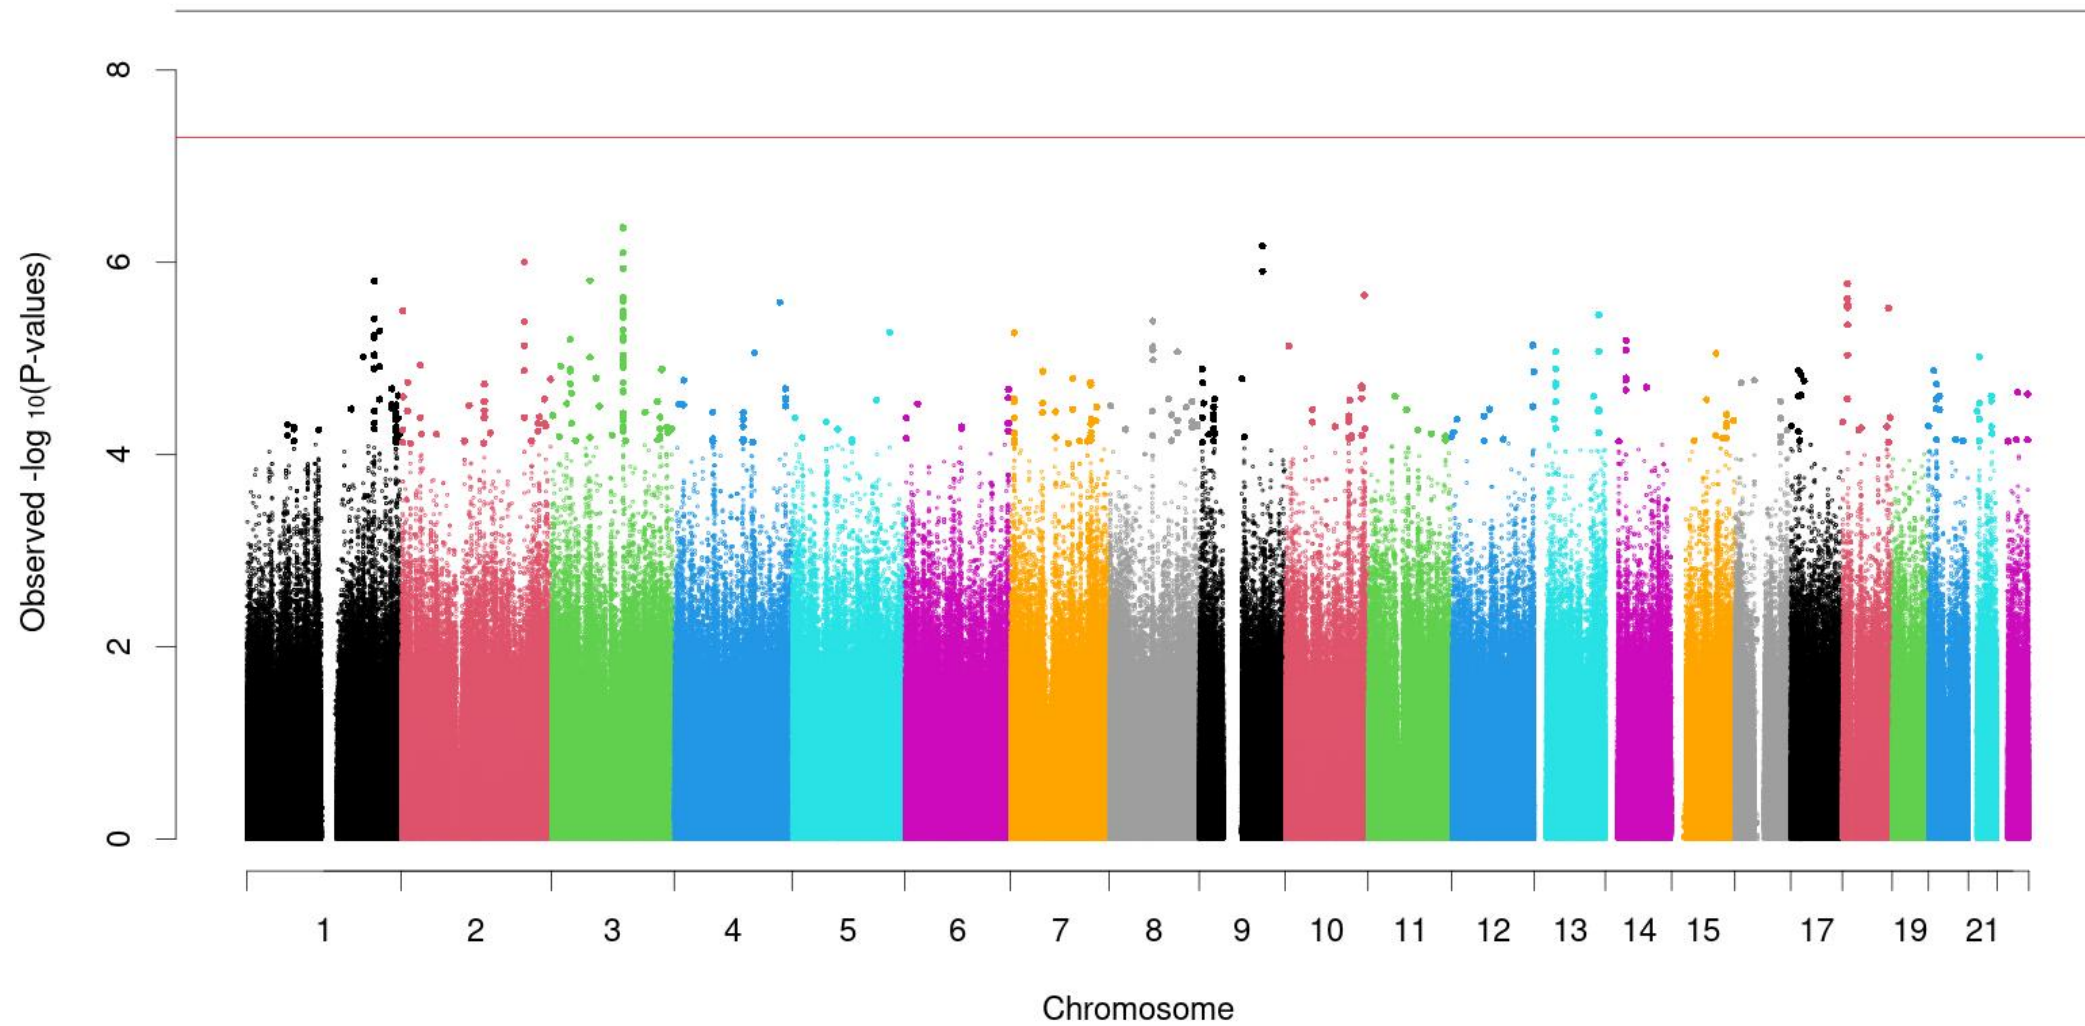

Manhattan plot for mz132.0765\_t72.5, creatine

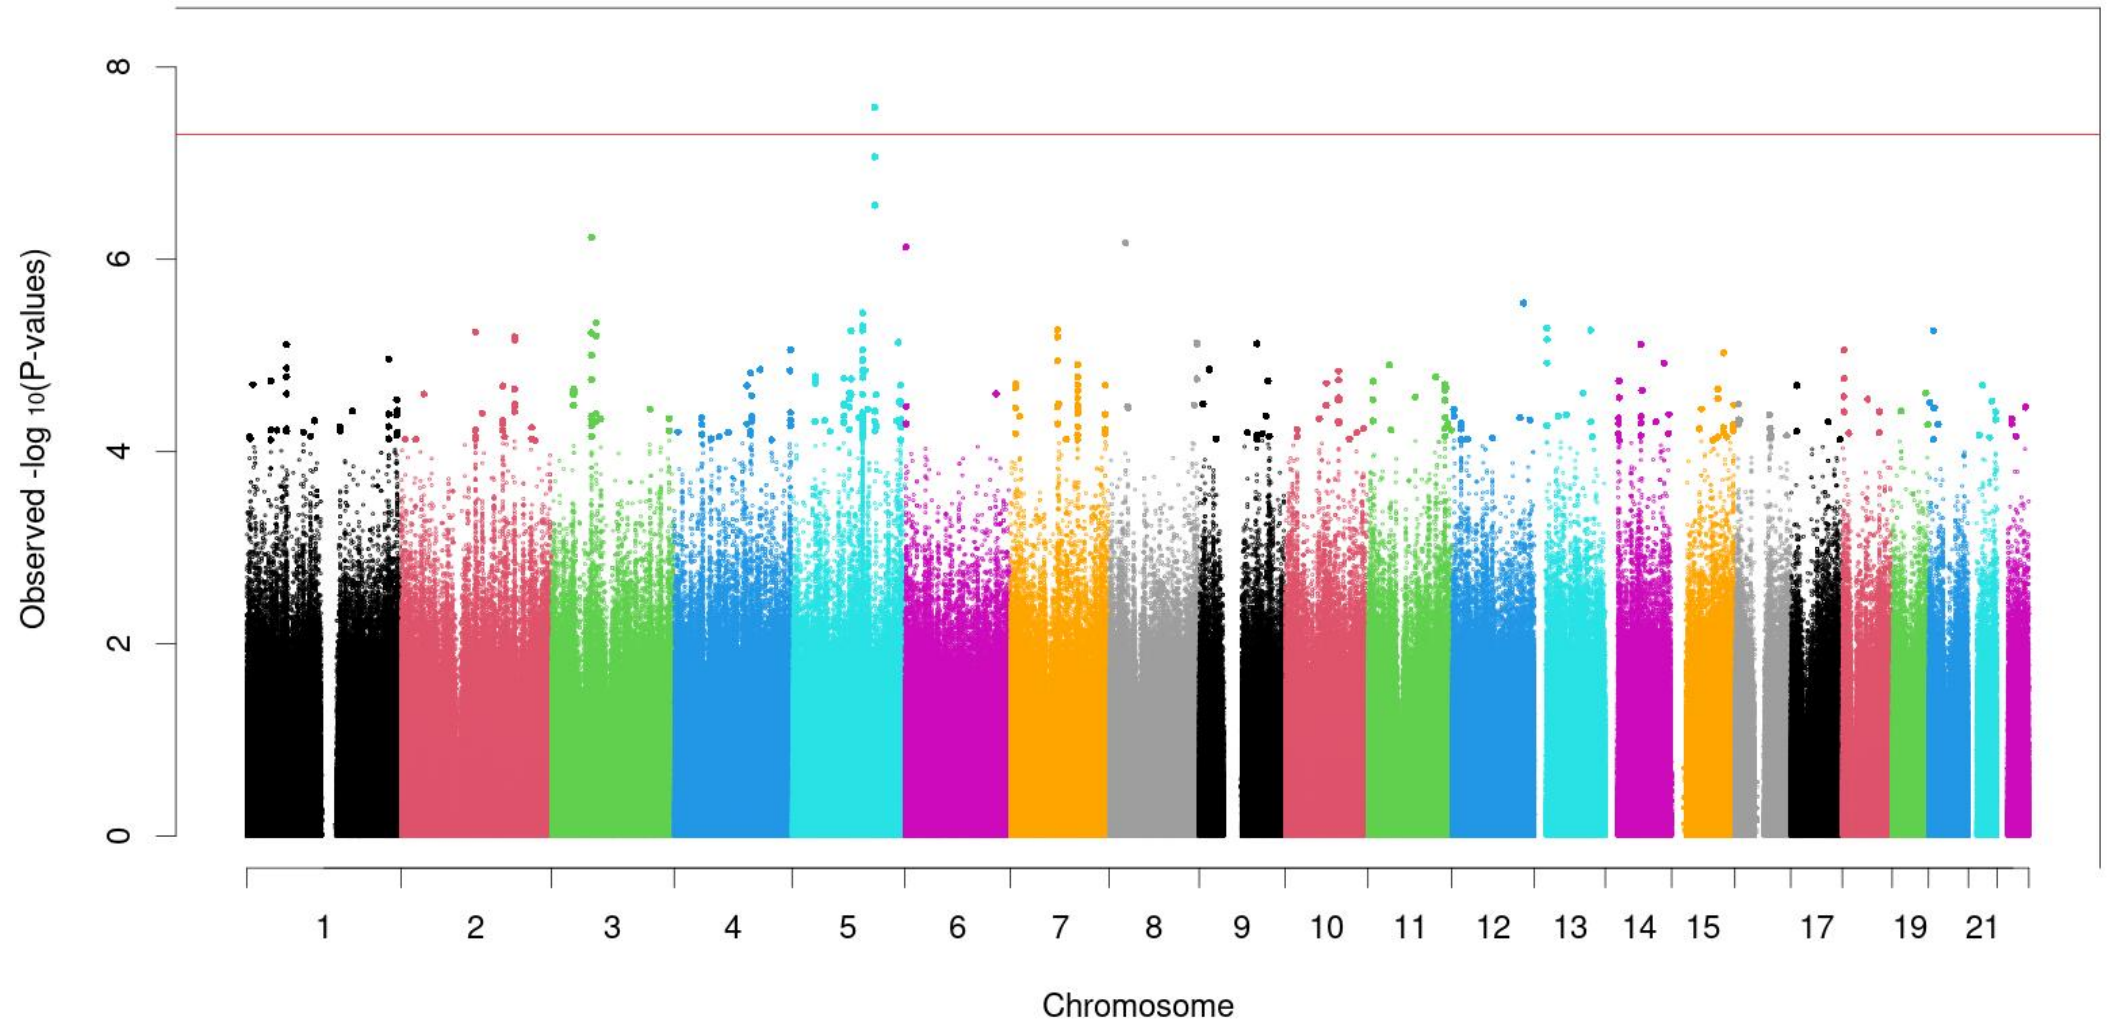

Manhattan plot for mz133.0647\_t24.9, trans-cinnamaldehyde

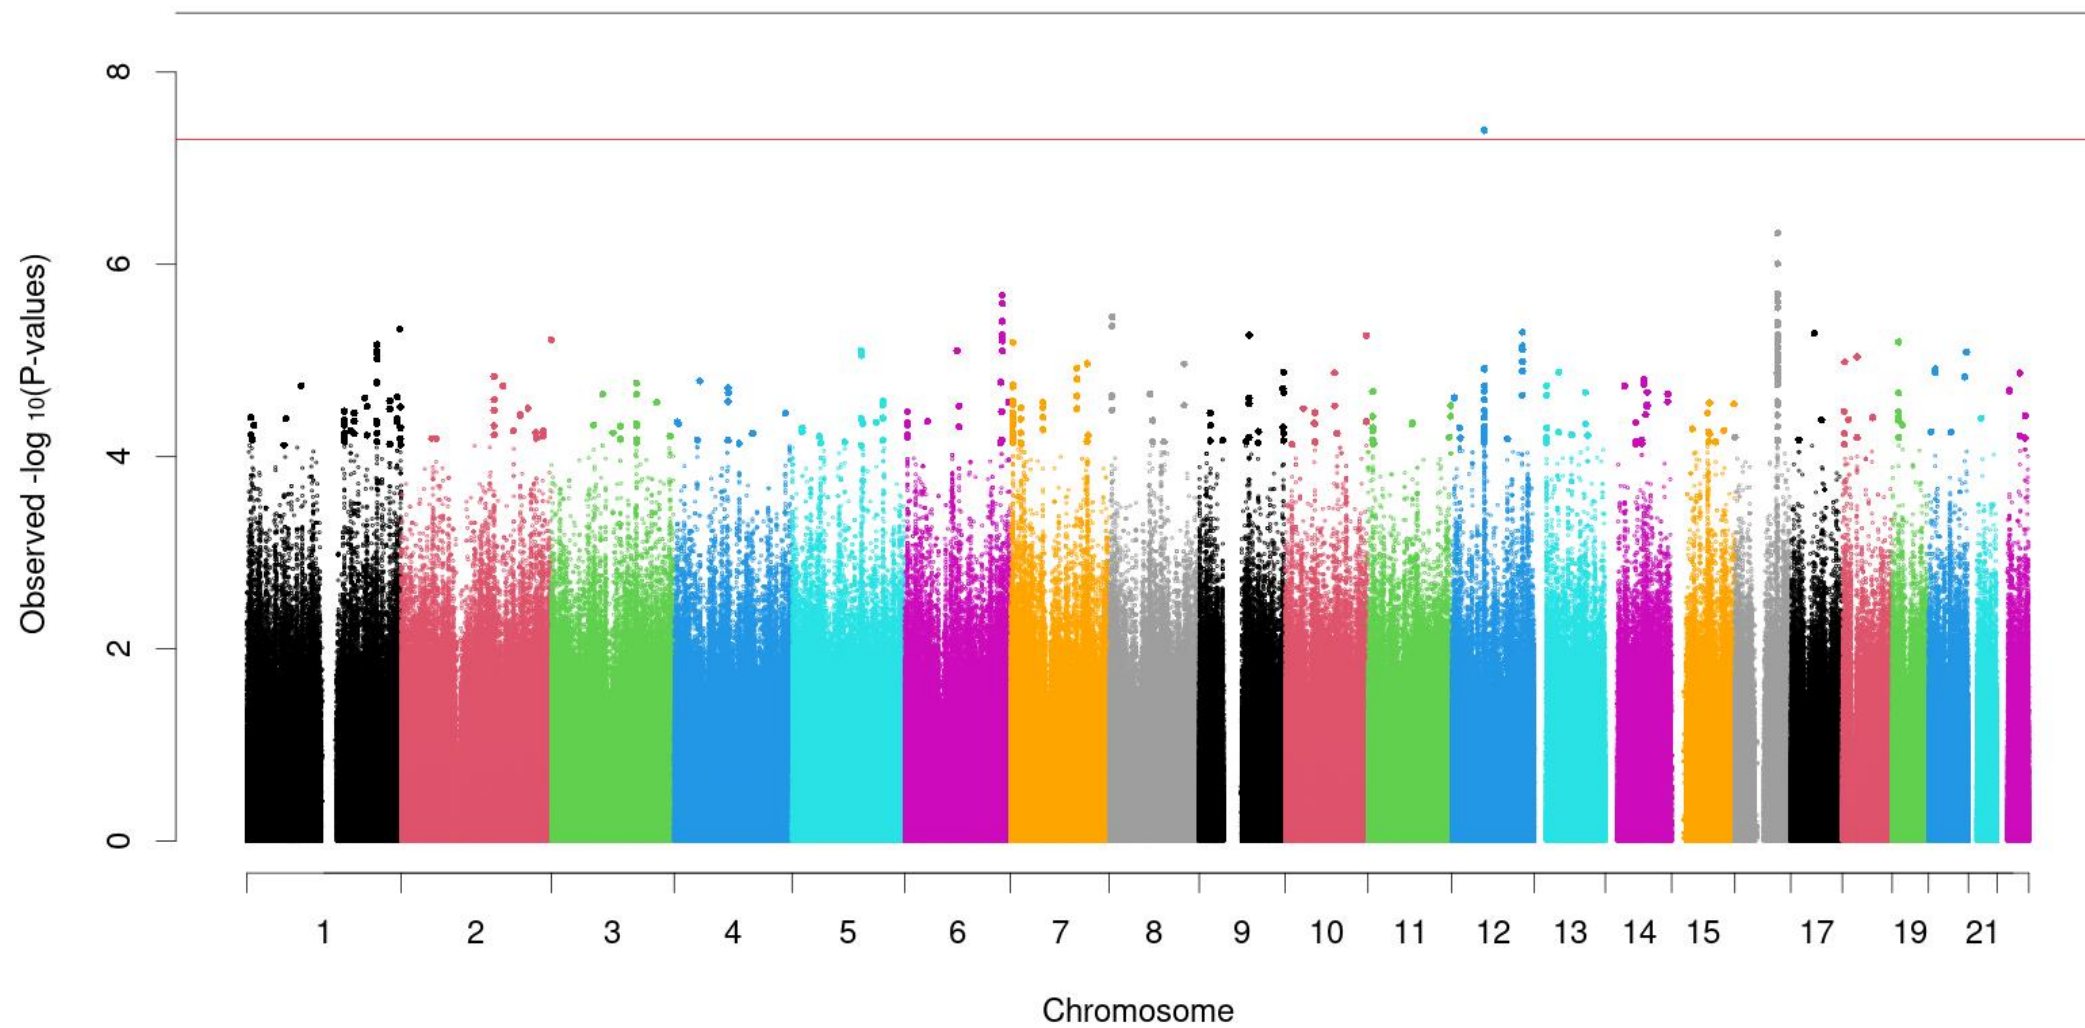



Manhattan plot for mz134.06\_t21.2, indoxyl sulfate

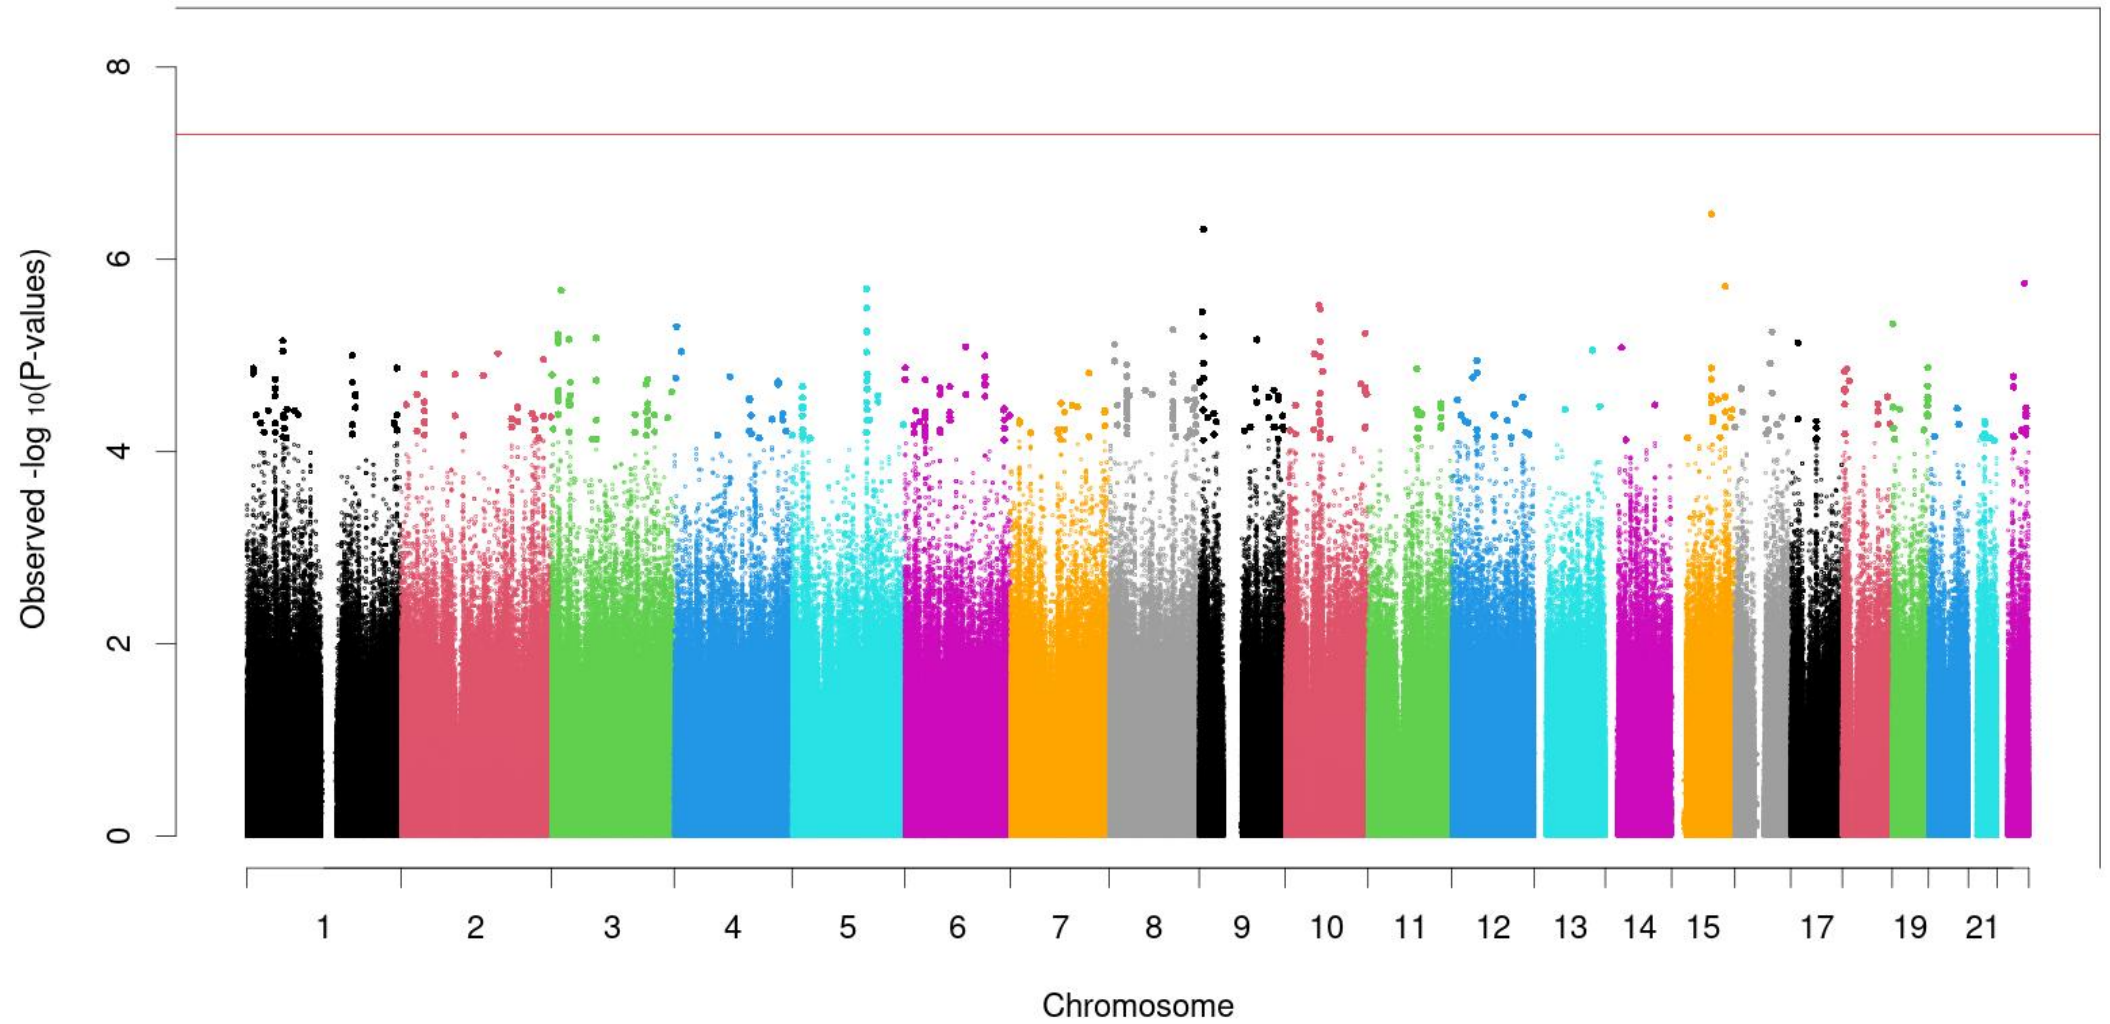

Manhattan plot for mz135.0306\_t23.2, hypoxanthine

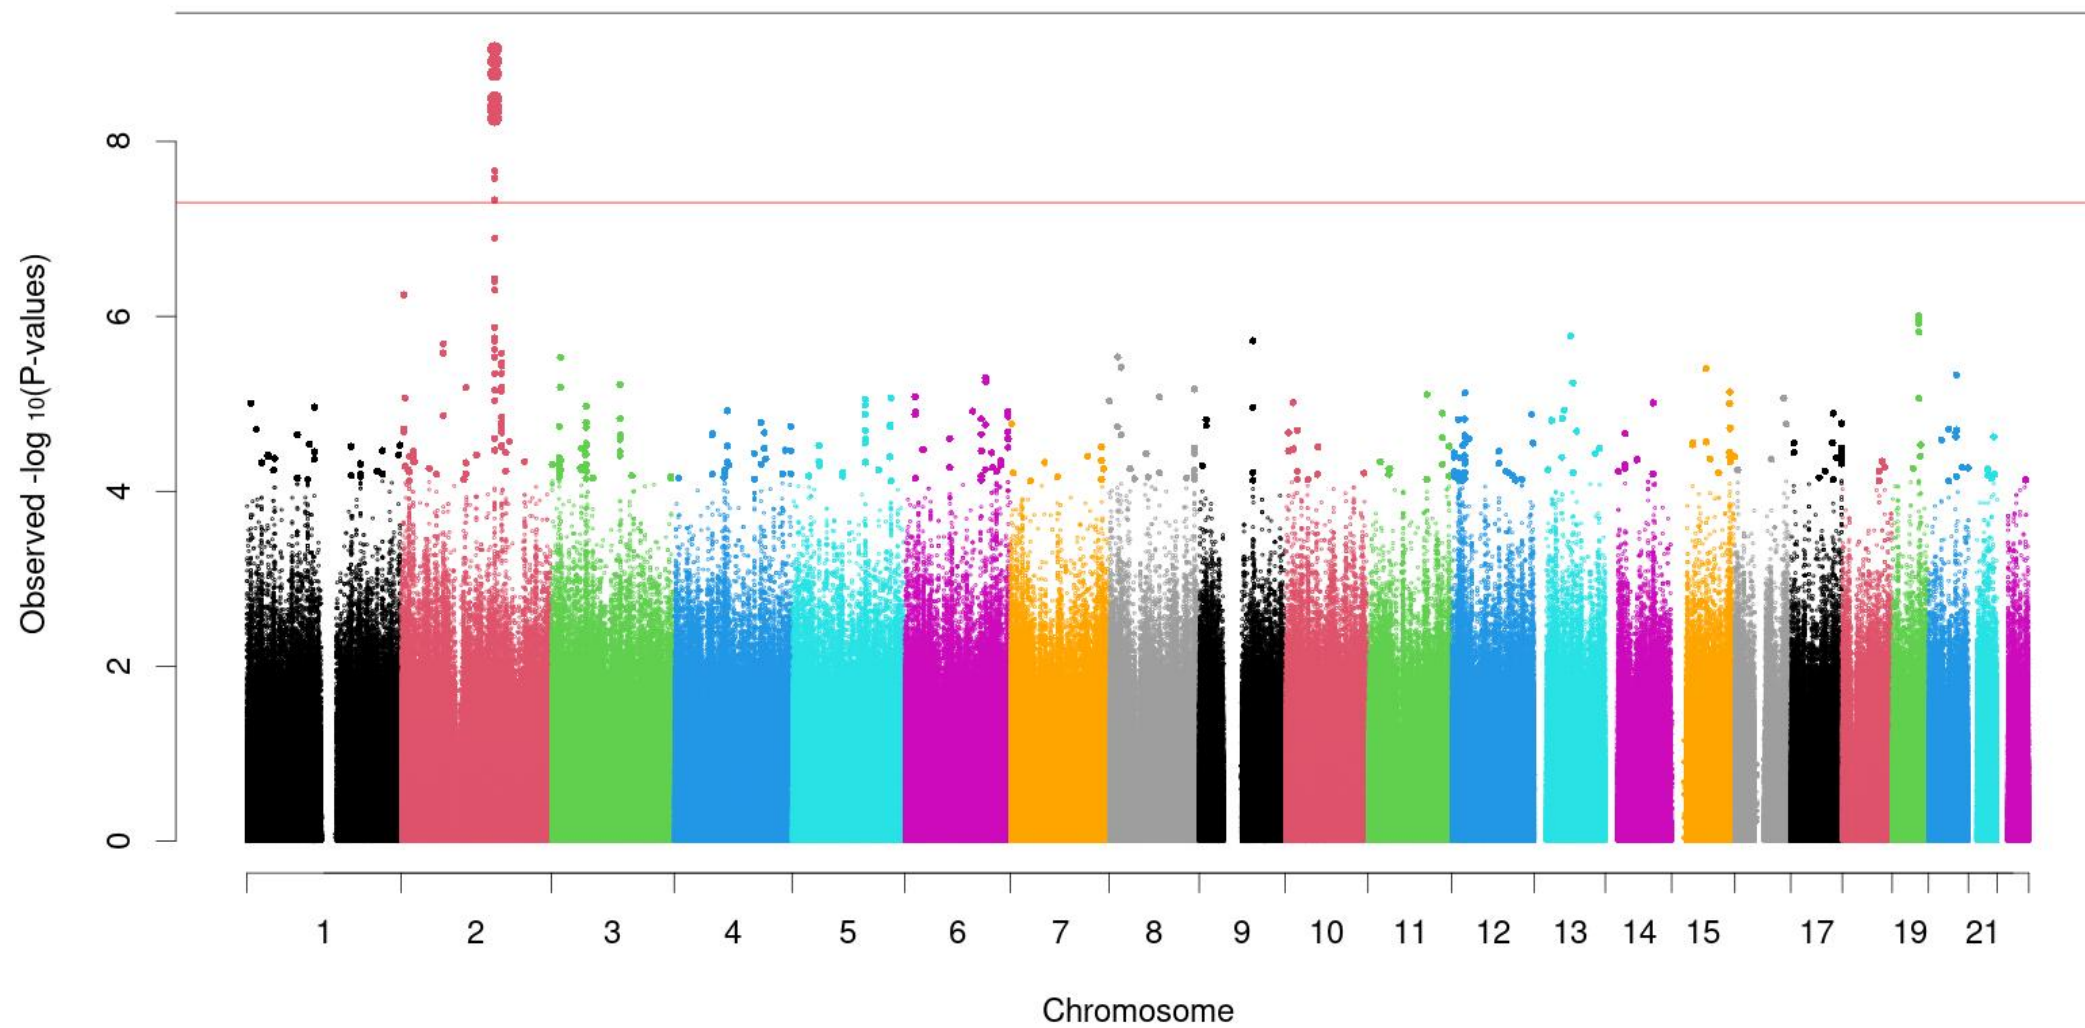

Manhattan plot for mz136.0428\_t56.3, homocysteine

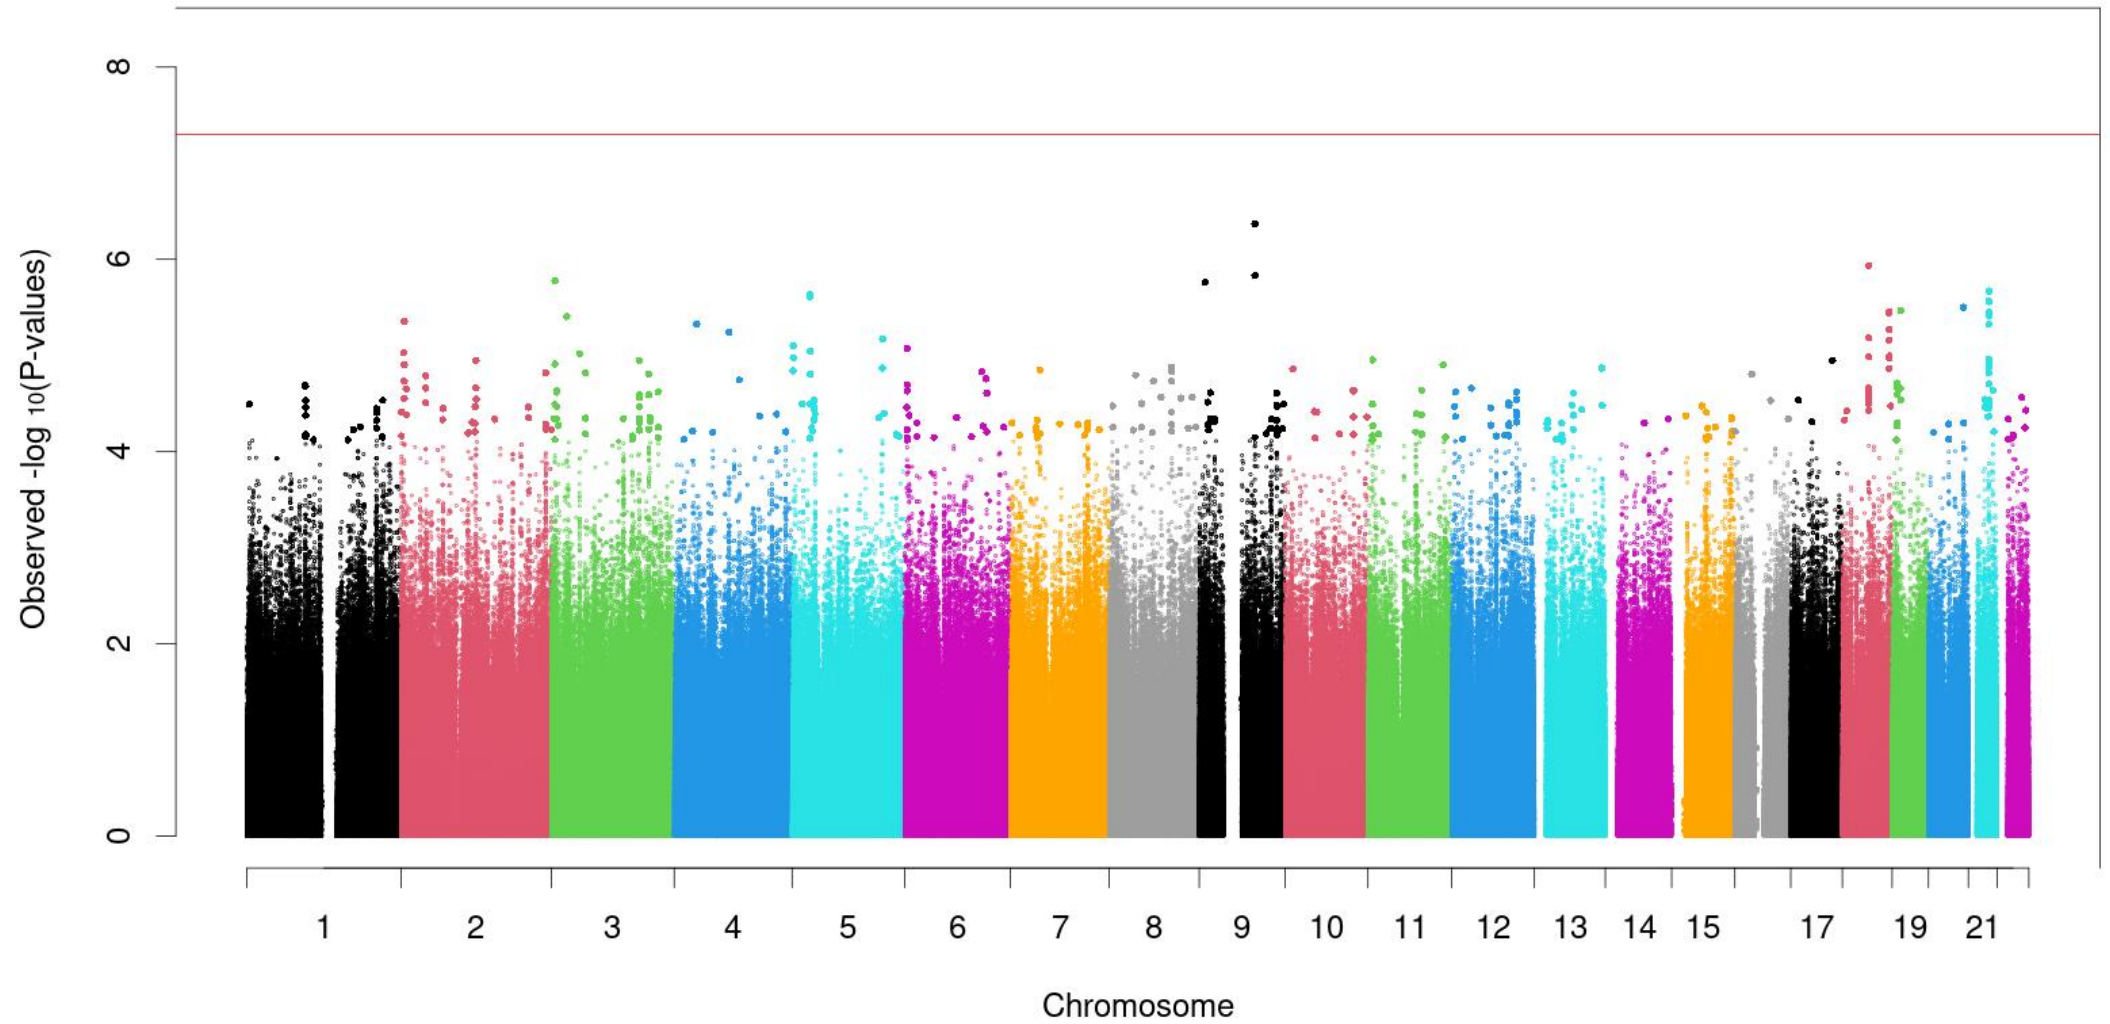



Manhattan plot for mz137.0457\_t39.7, hypoxanthine

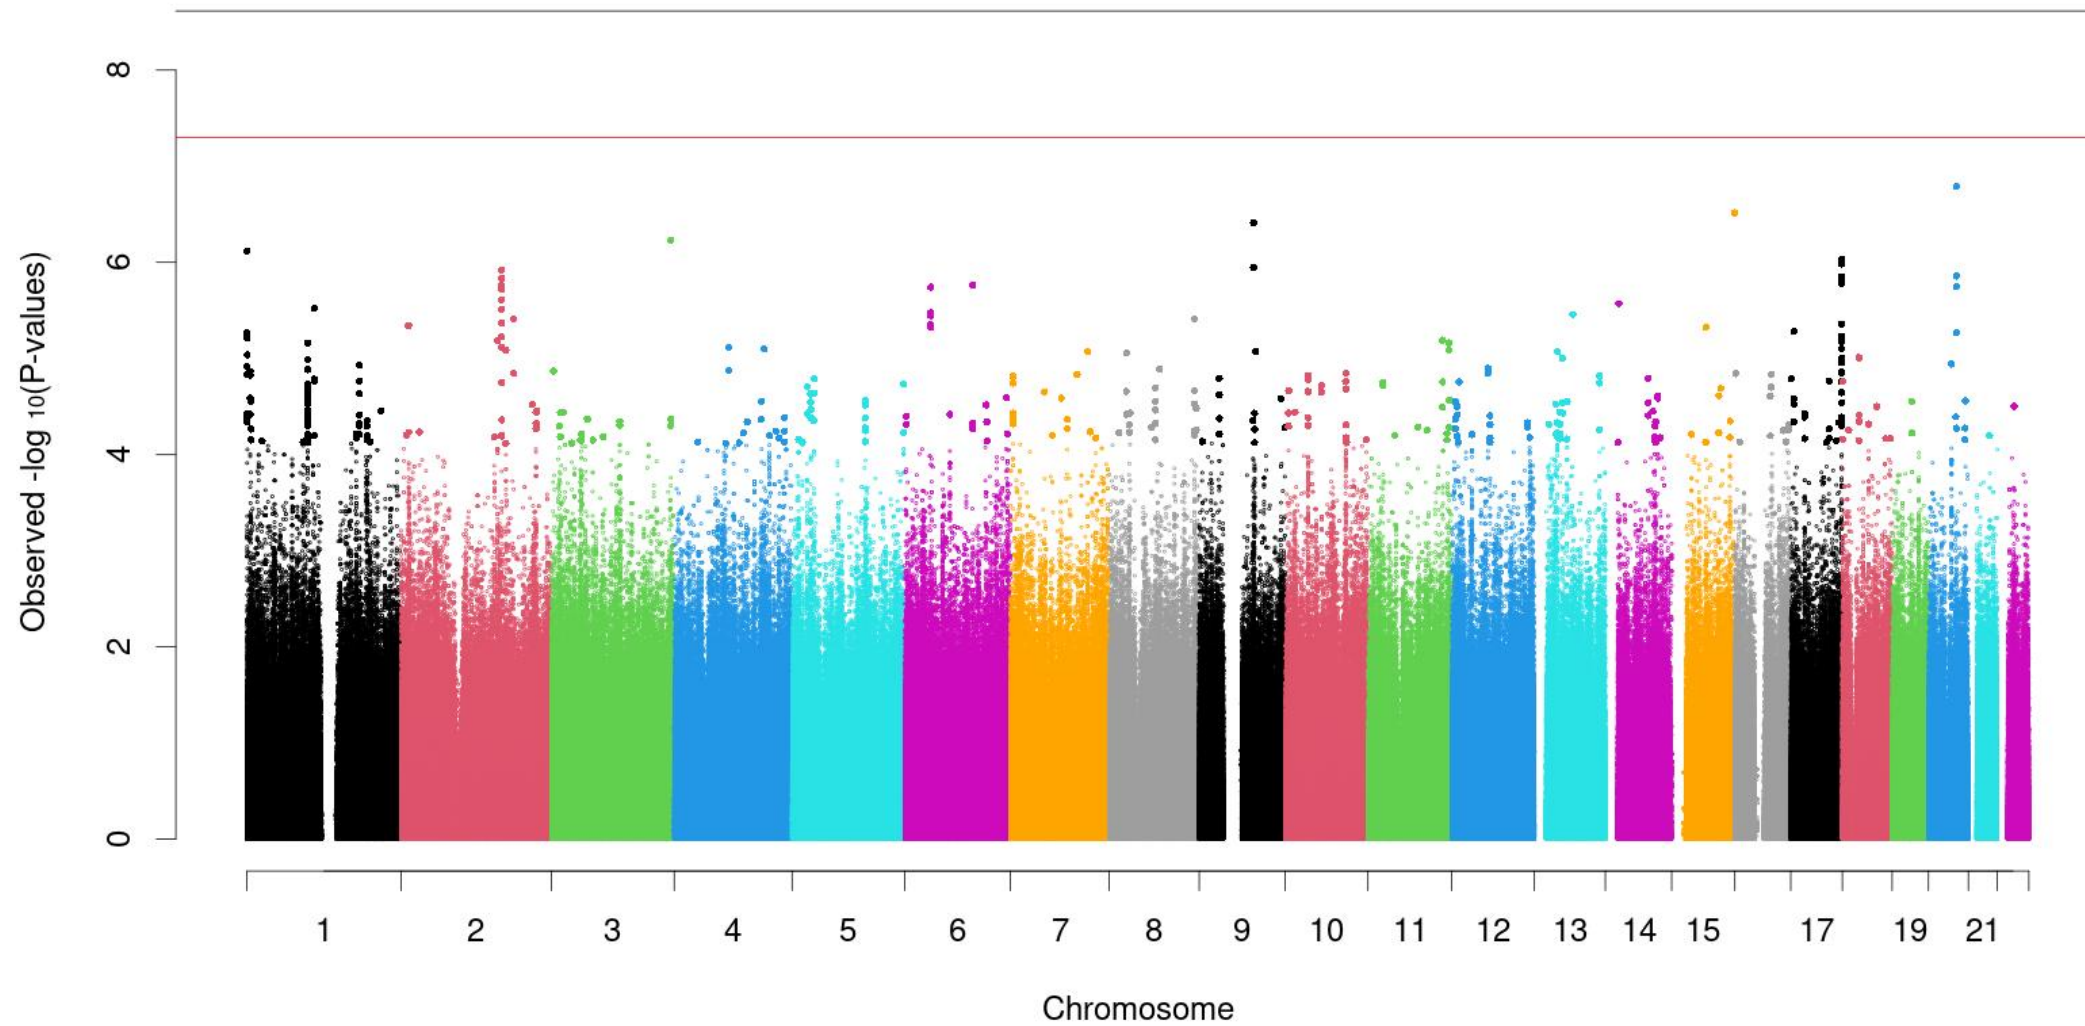

Manhattan plot for mz138.055\_t53.8, trigonelline

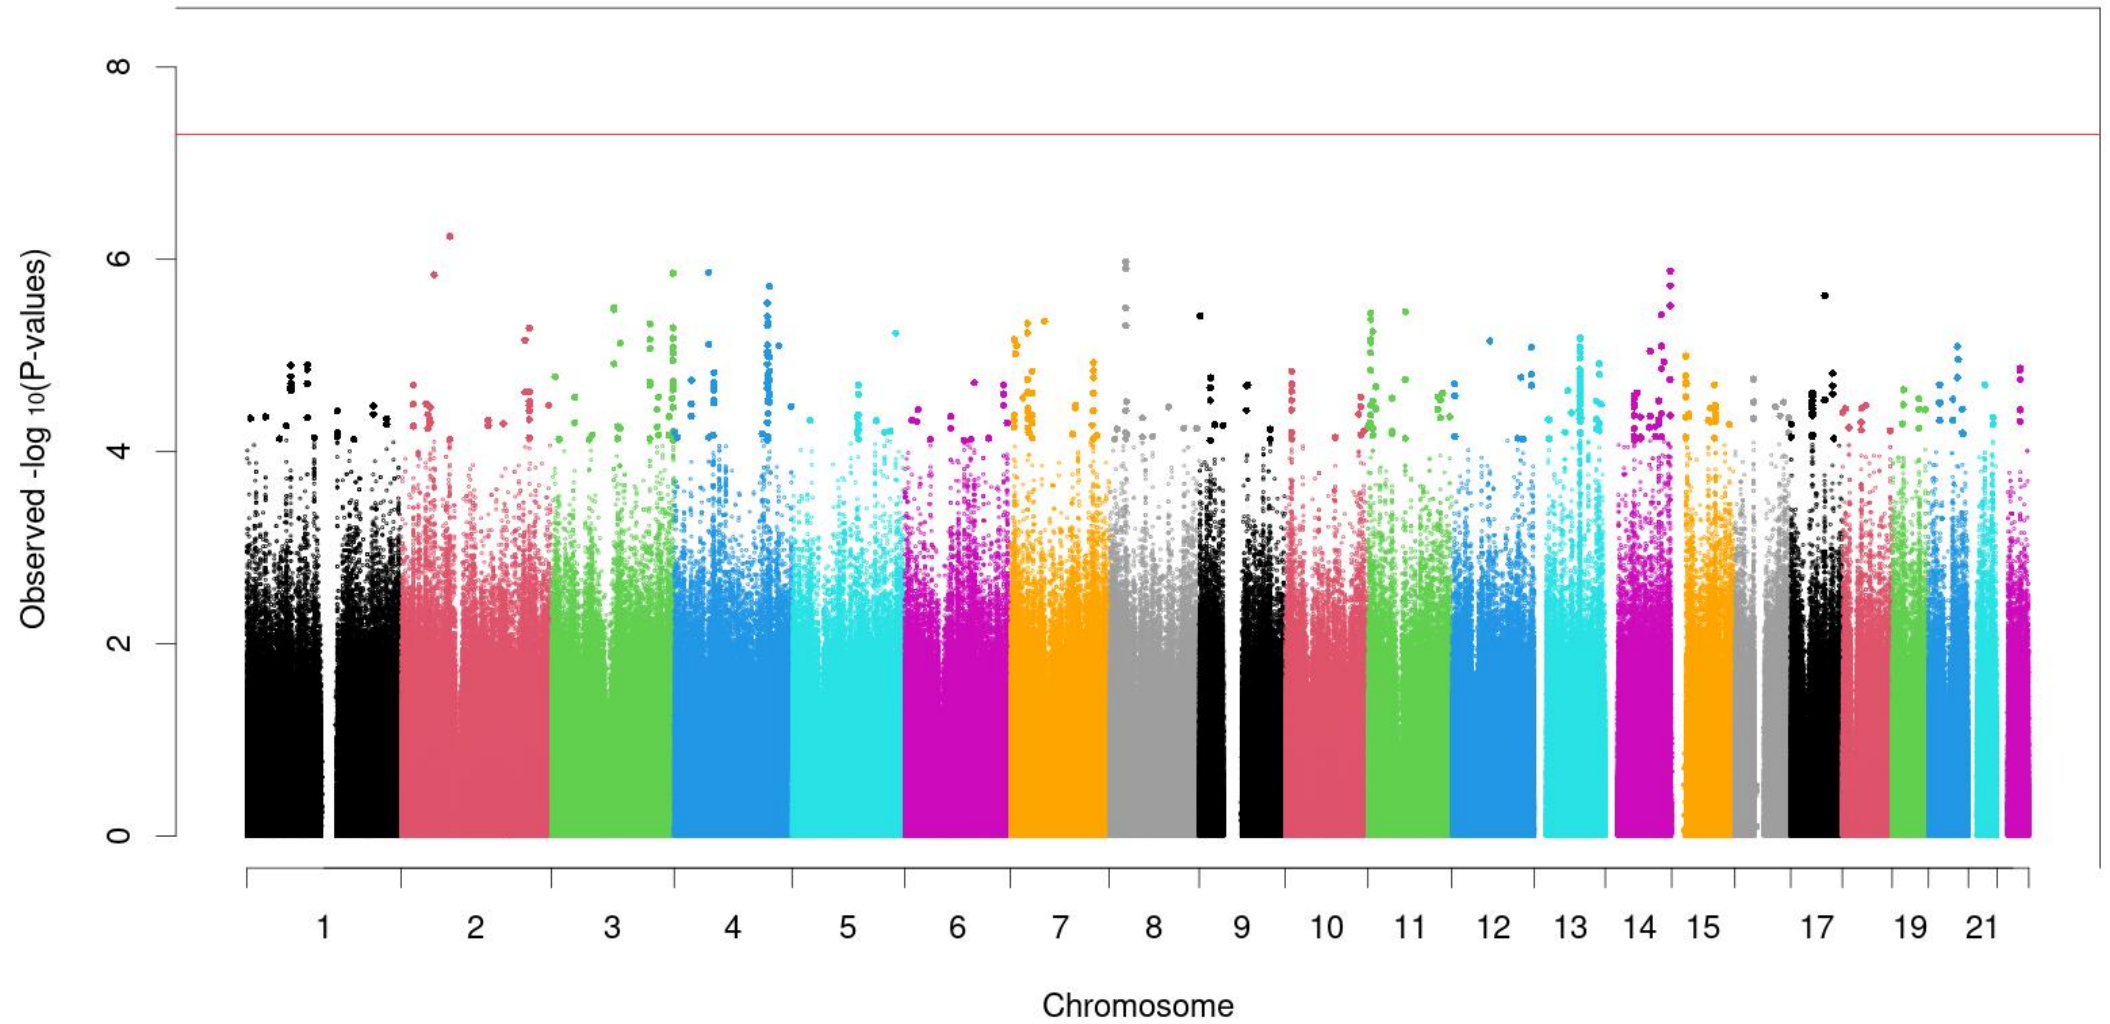

Manhattan plot for mz138.0795\_t55.7, 1-methylnicotinamide

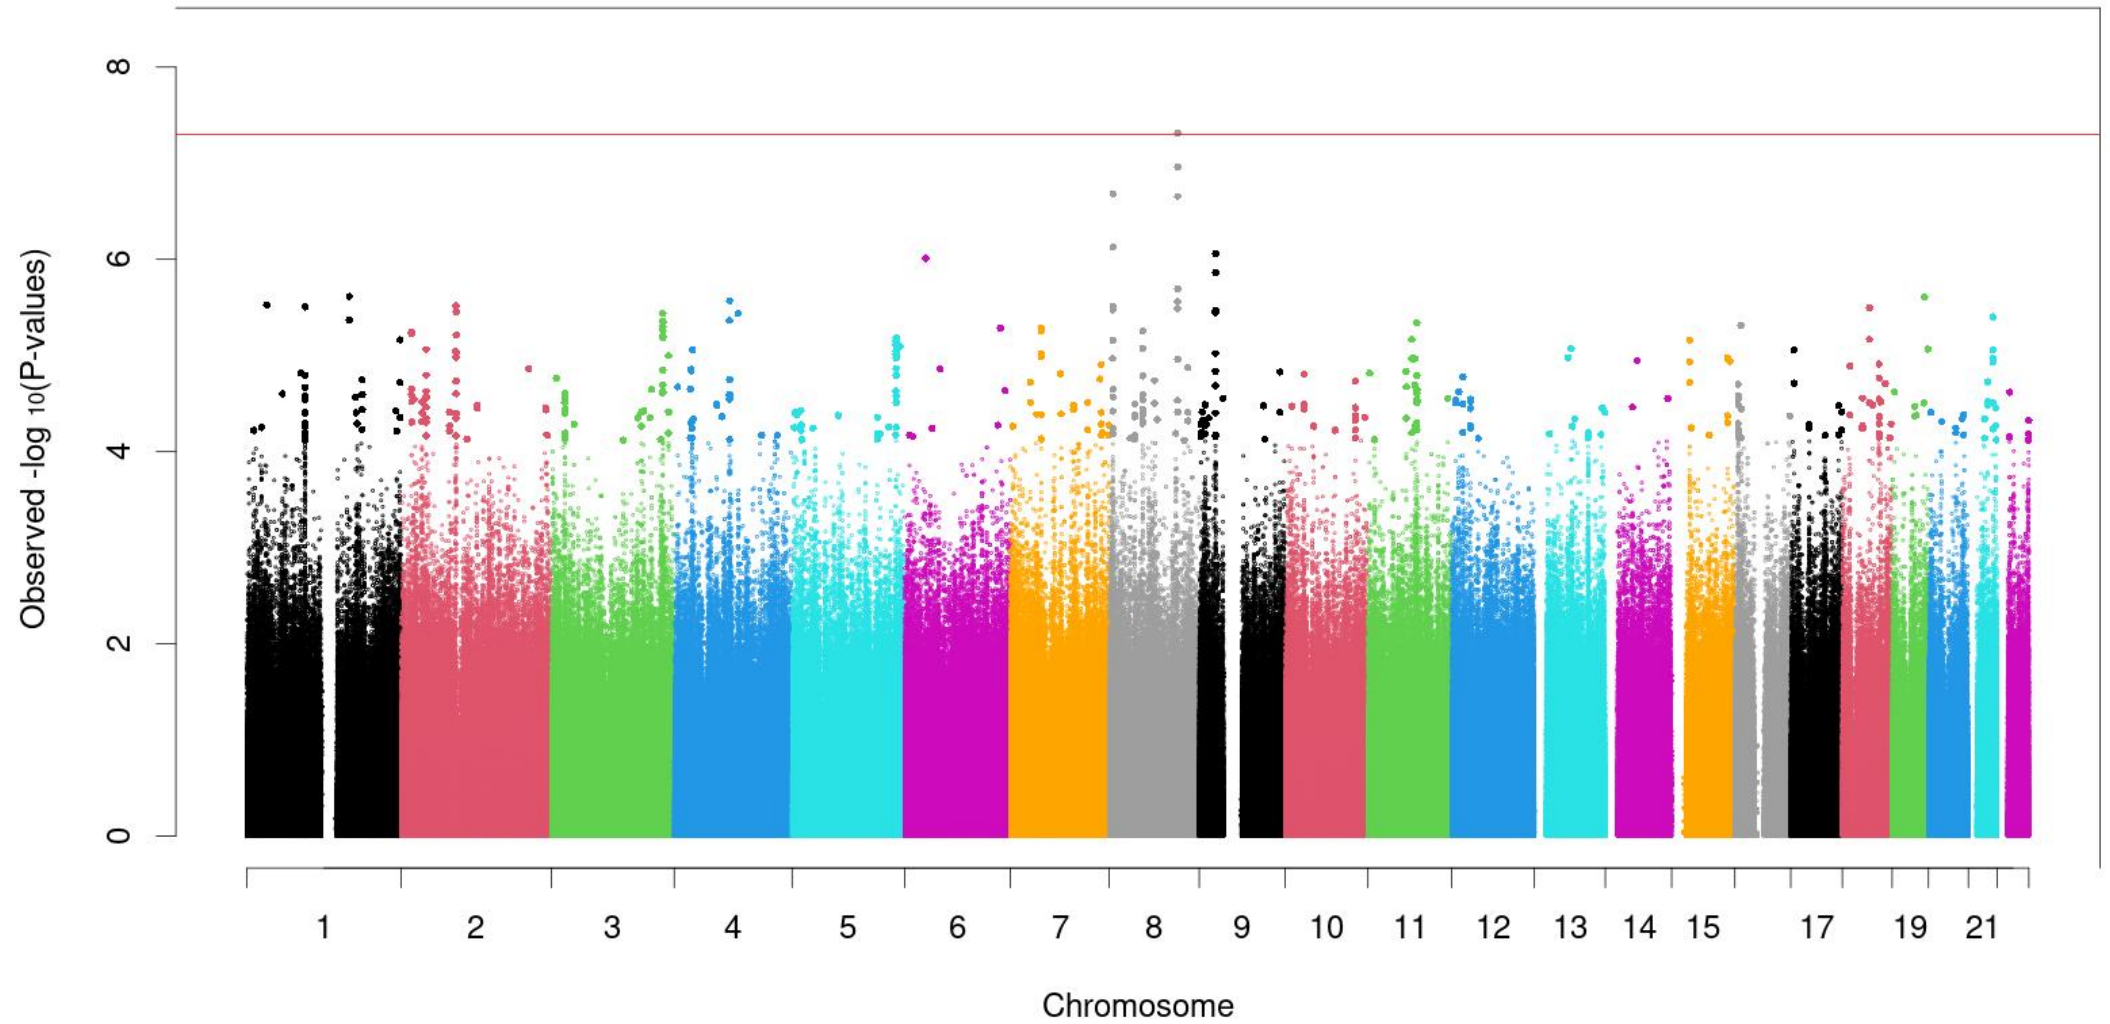



Manhattan plot for mz139.0502\_t64.4, urocanate

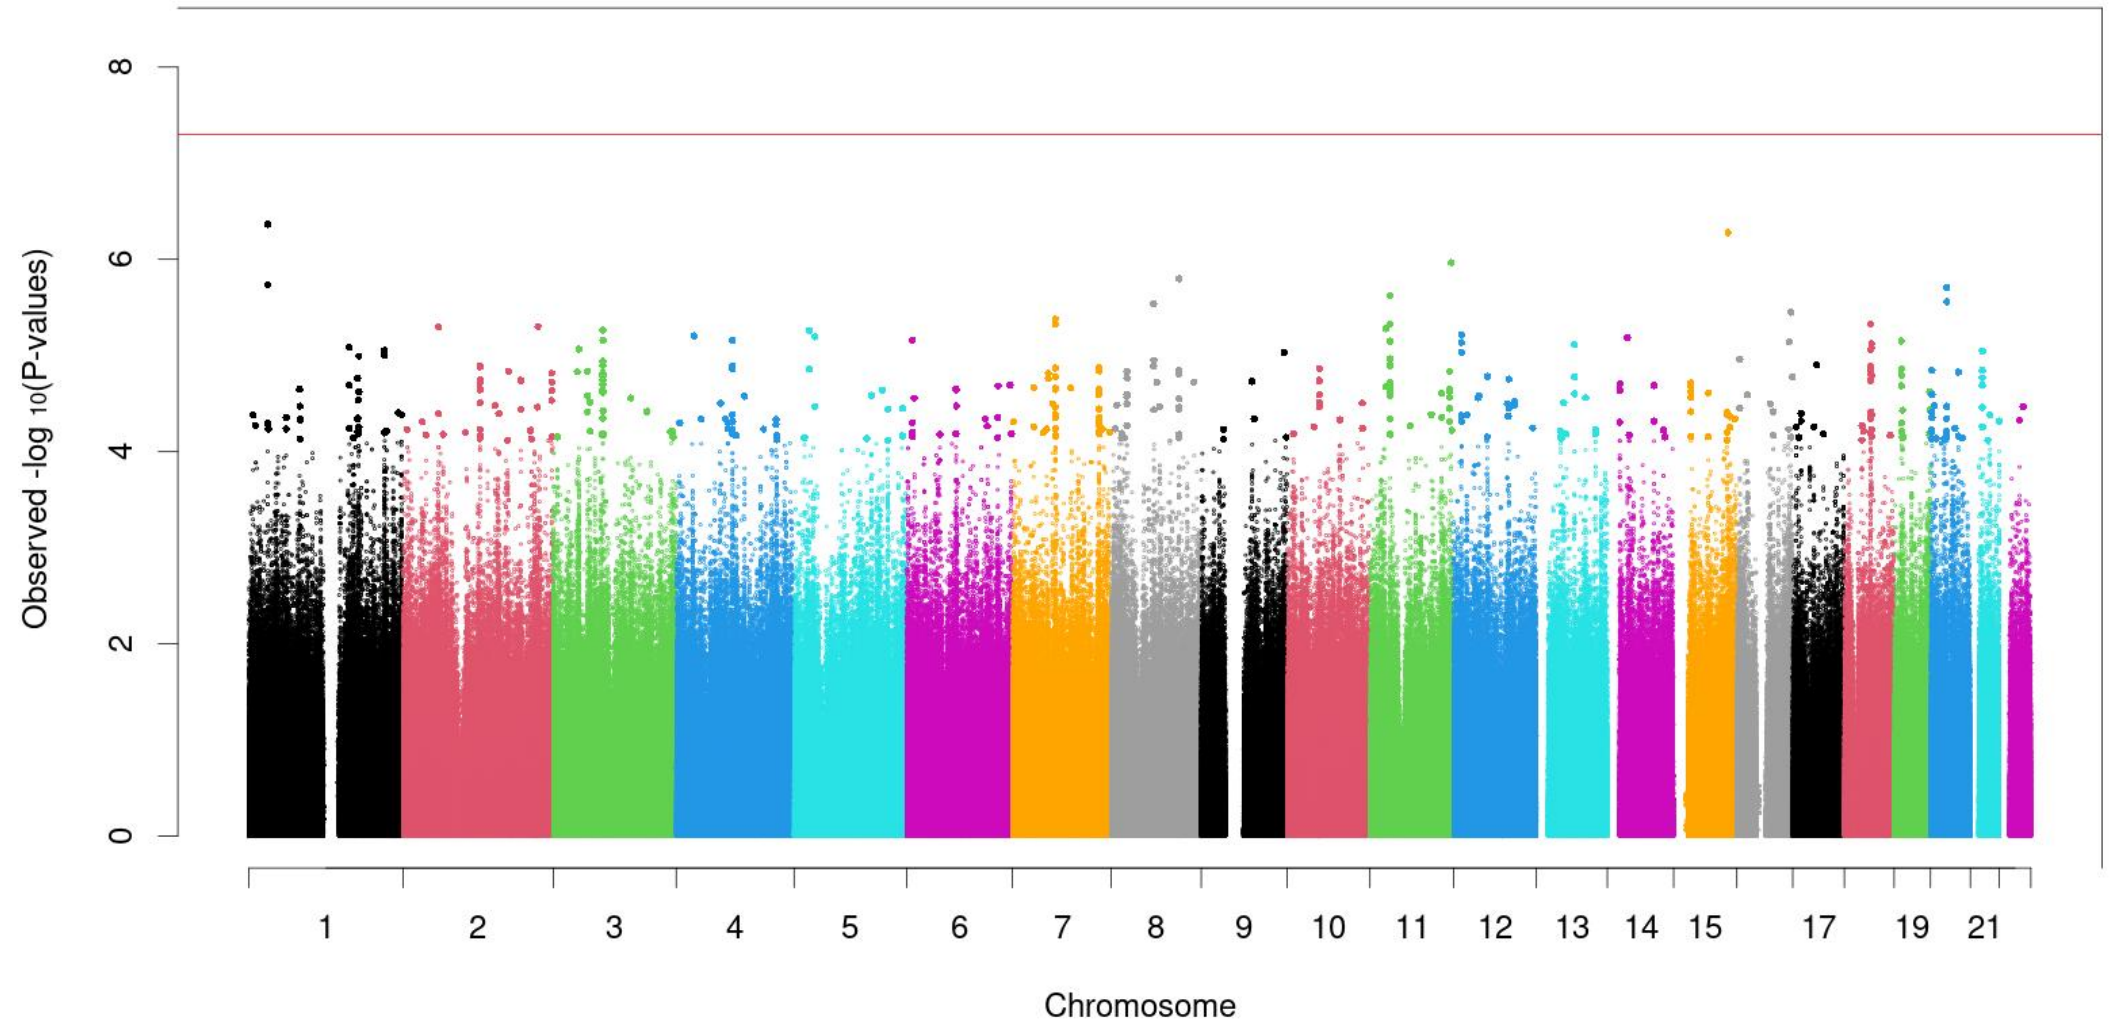

Manhattan plot for mz140.0118\_t36.8, ethanolamine phosphate

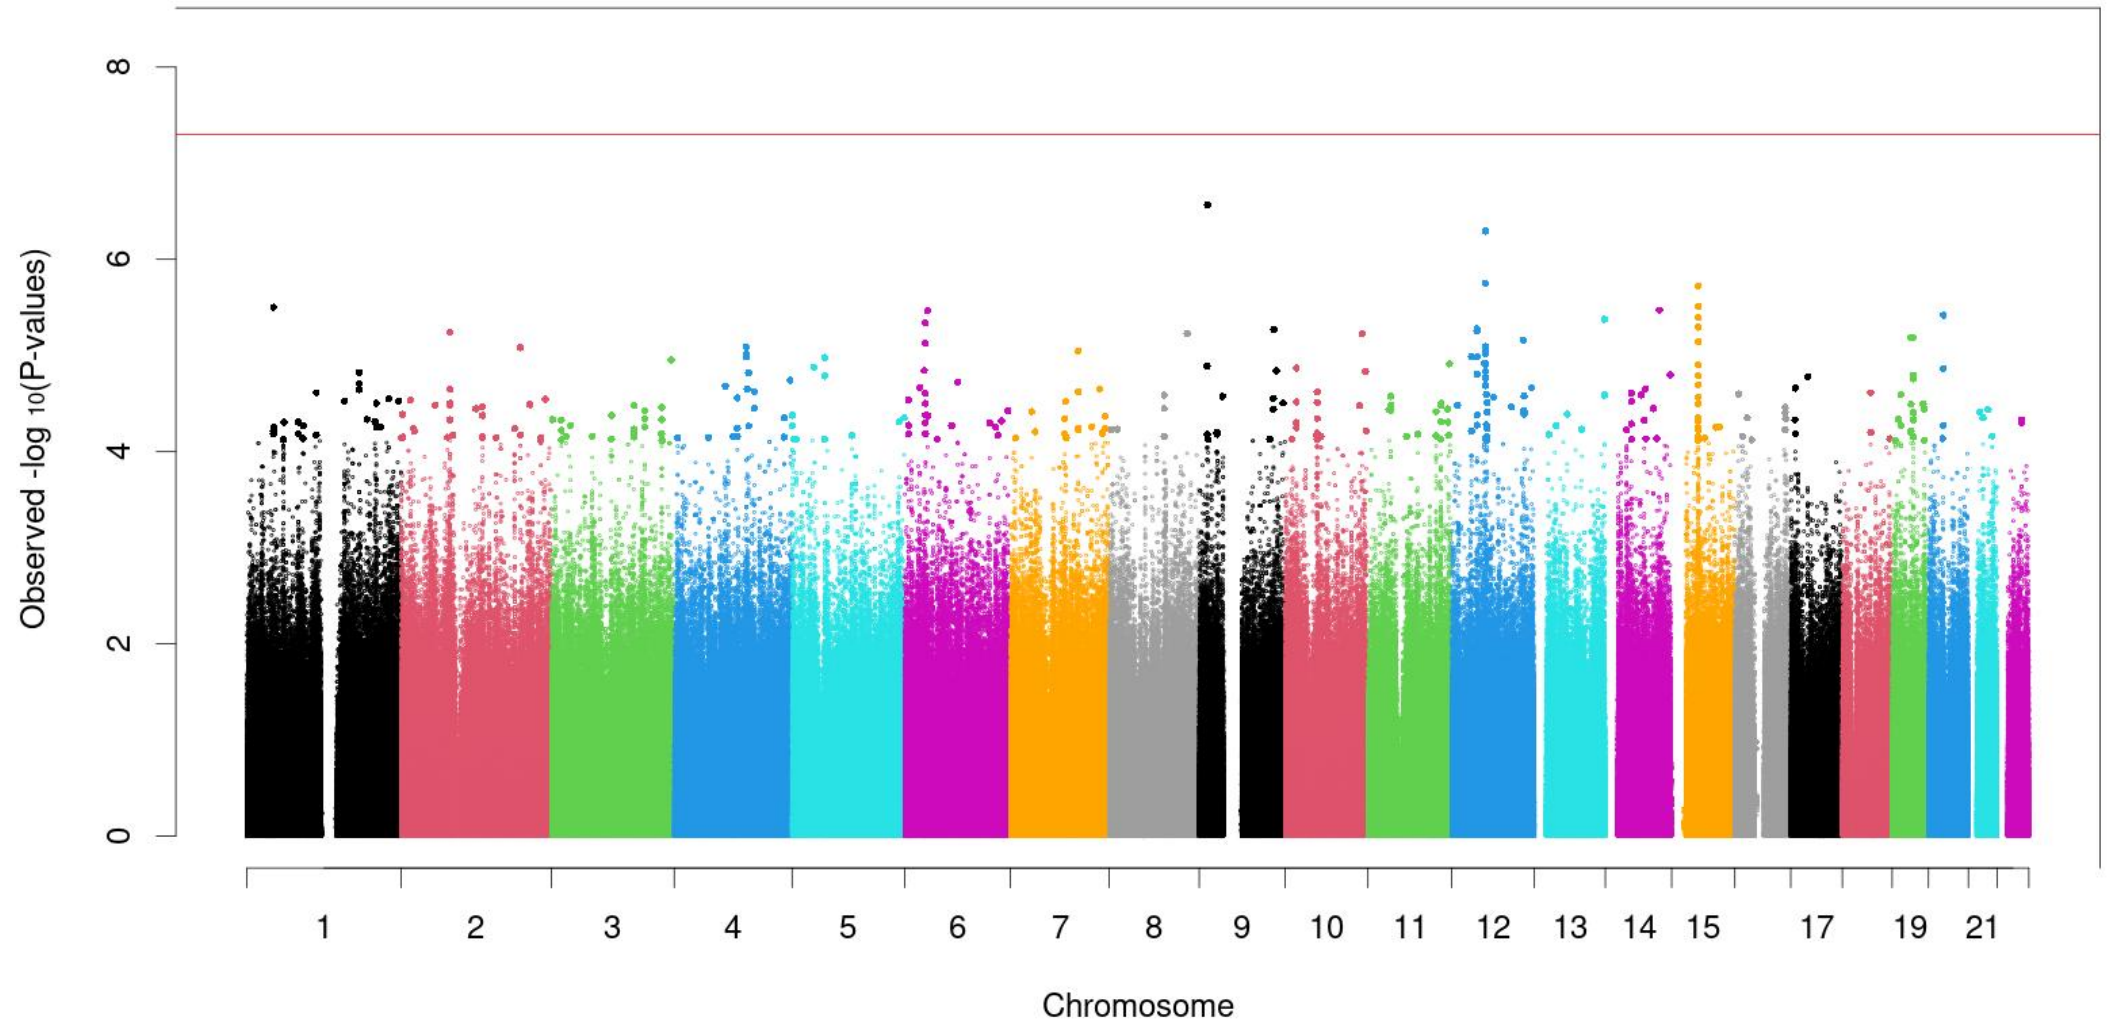

Manhattan plot for mz143.1077\_t59.1, caprylic acid

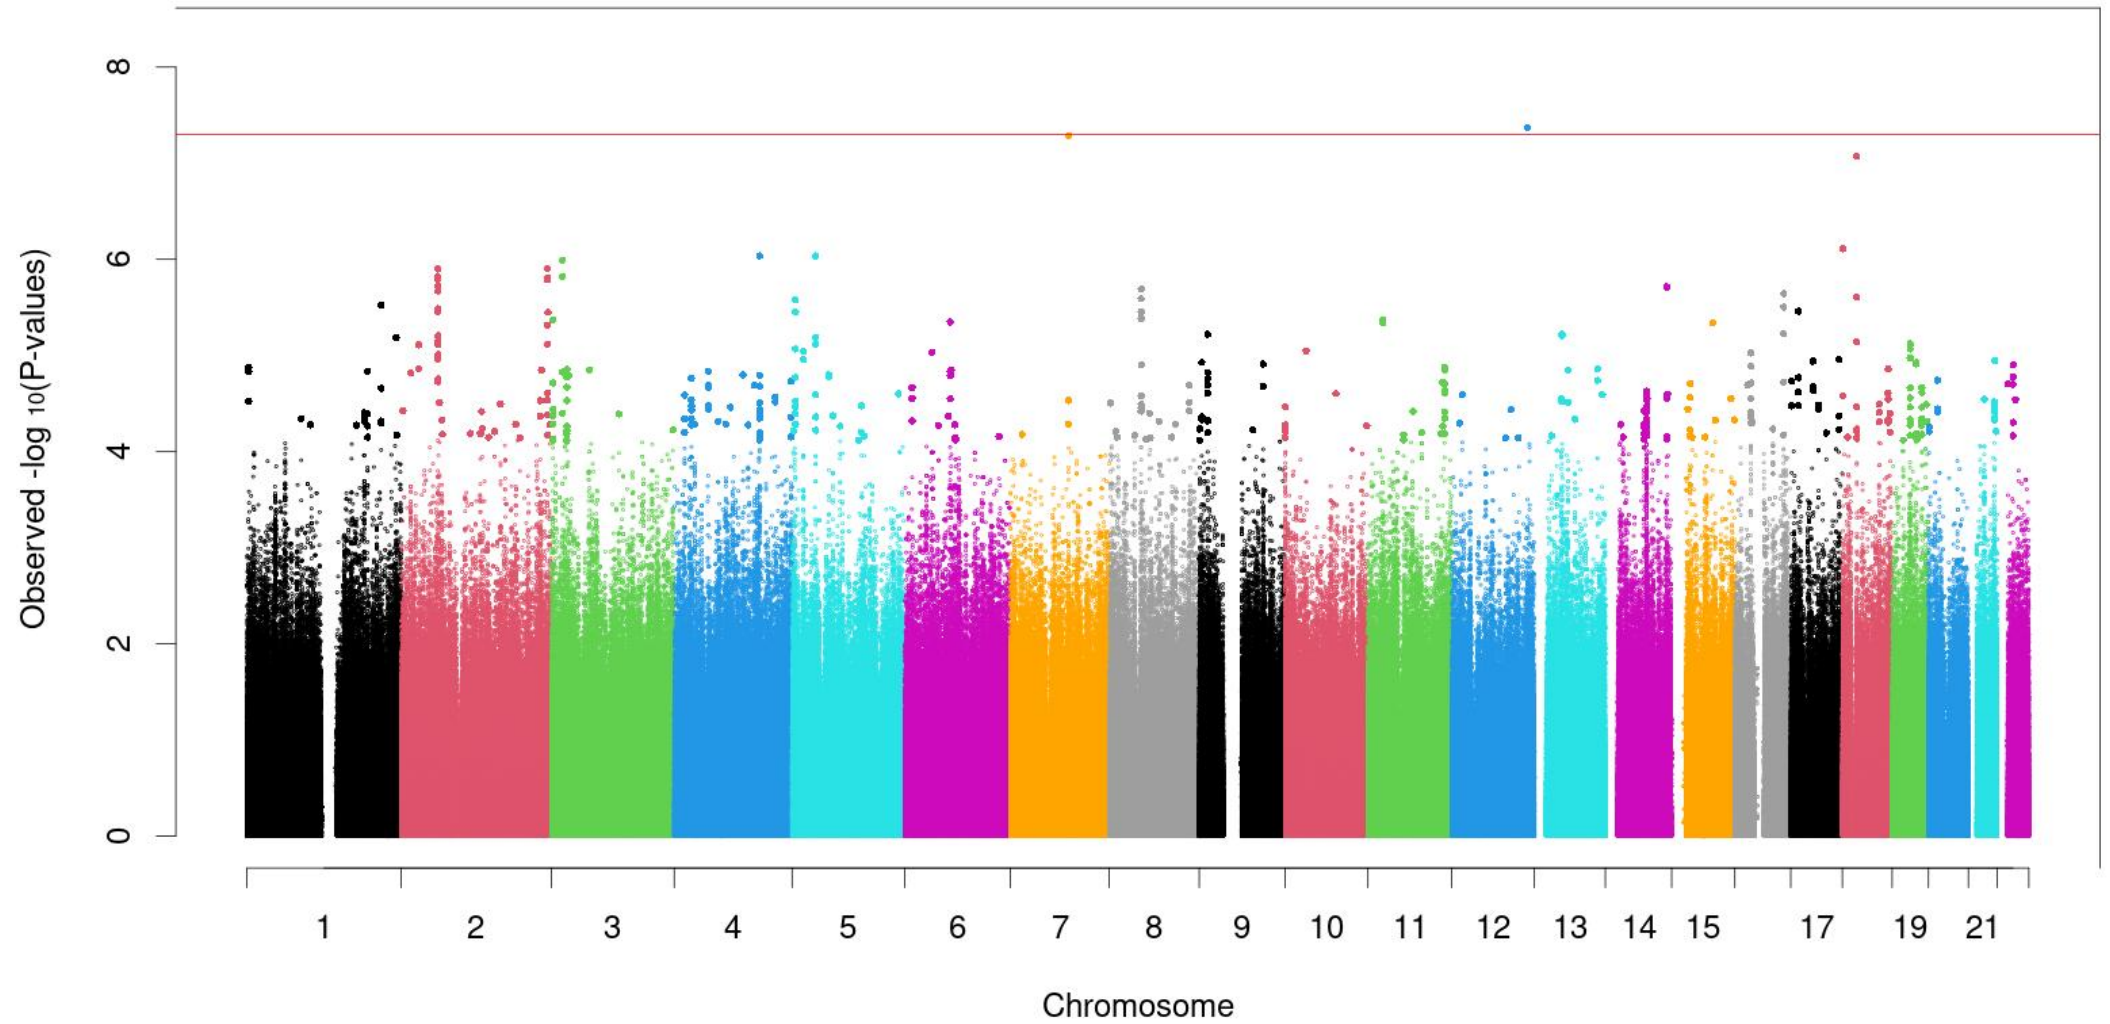



Manhattan plot for mz144.0807\_t46.2, 1-naphthylamine

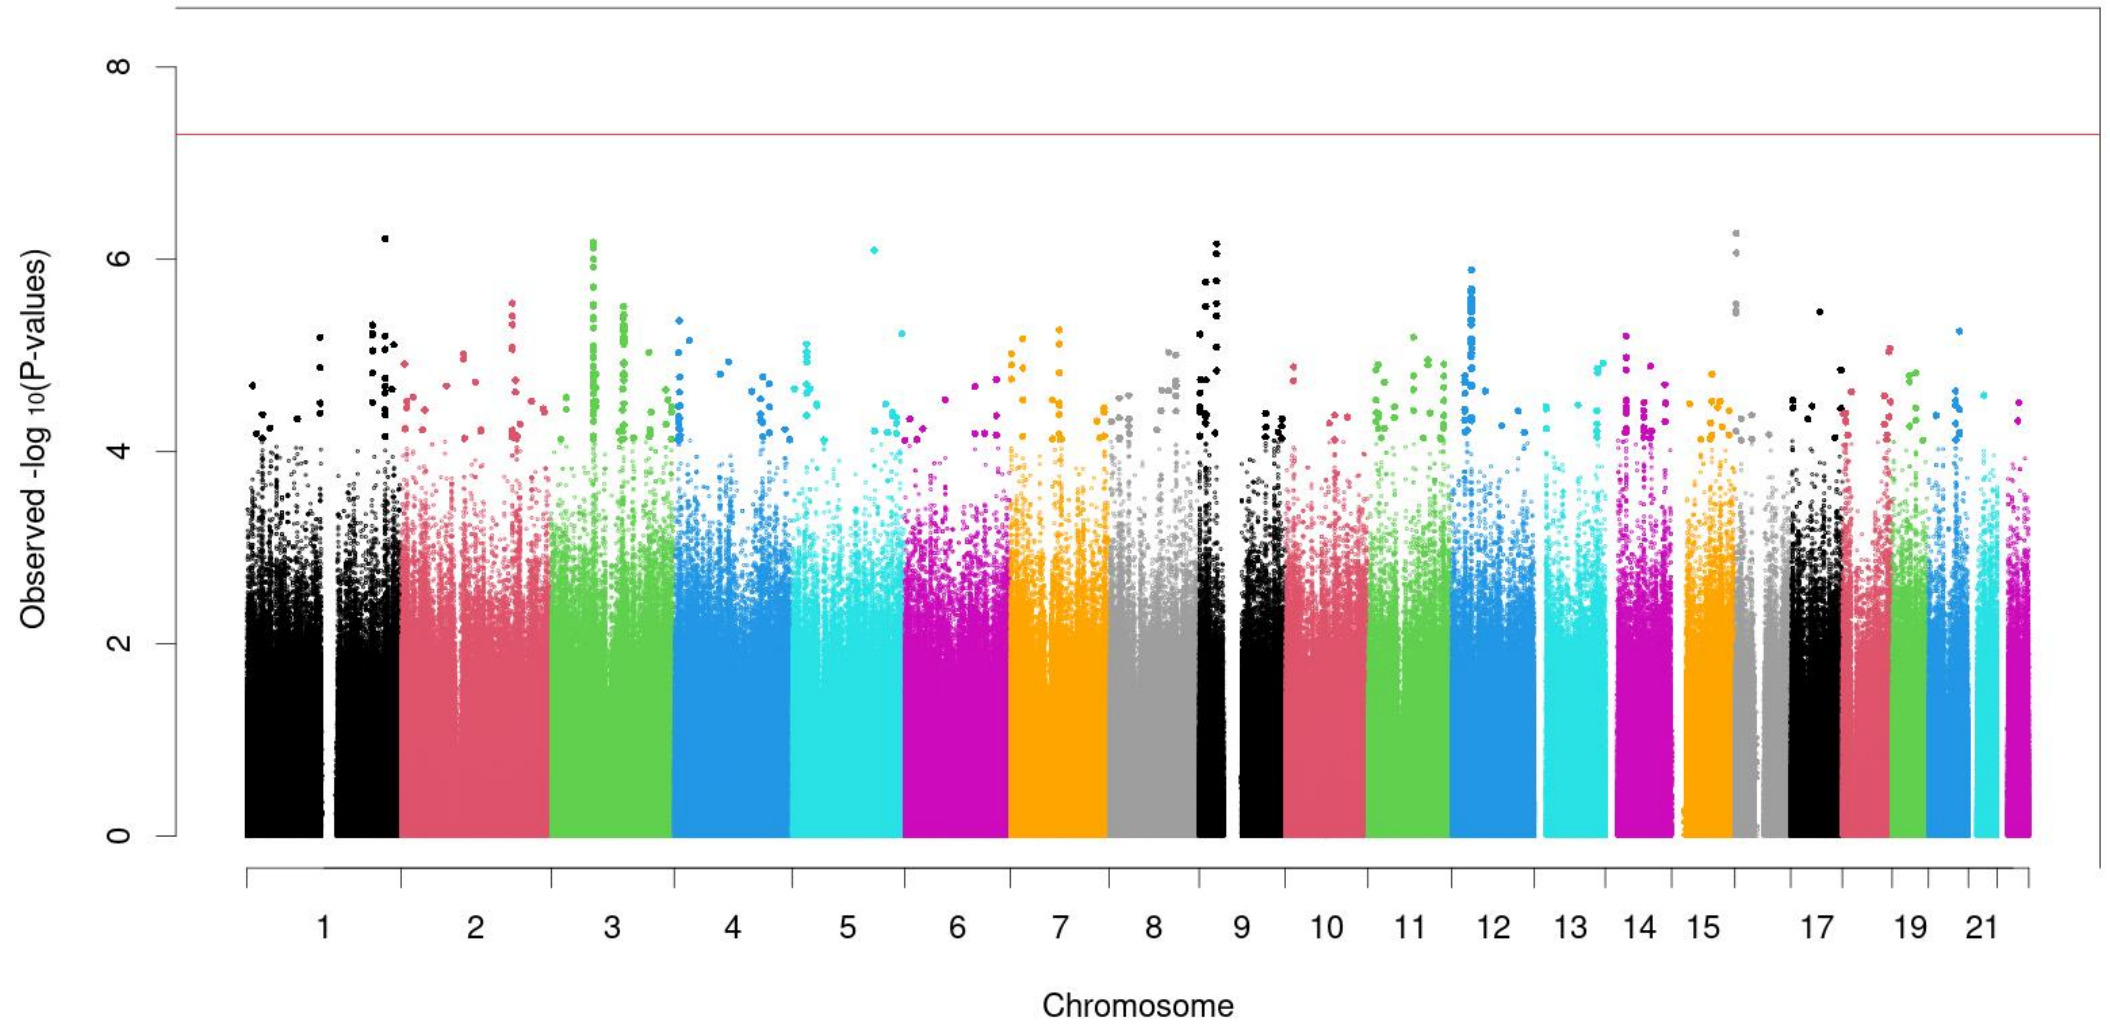

Manhattan plot for mz145.0142\_t24.5, alpha-ketoglutaric acid

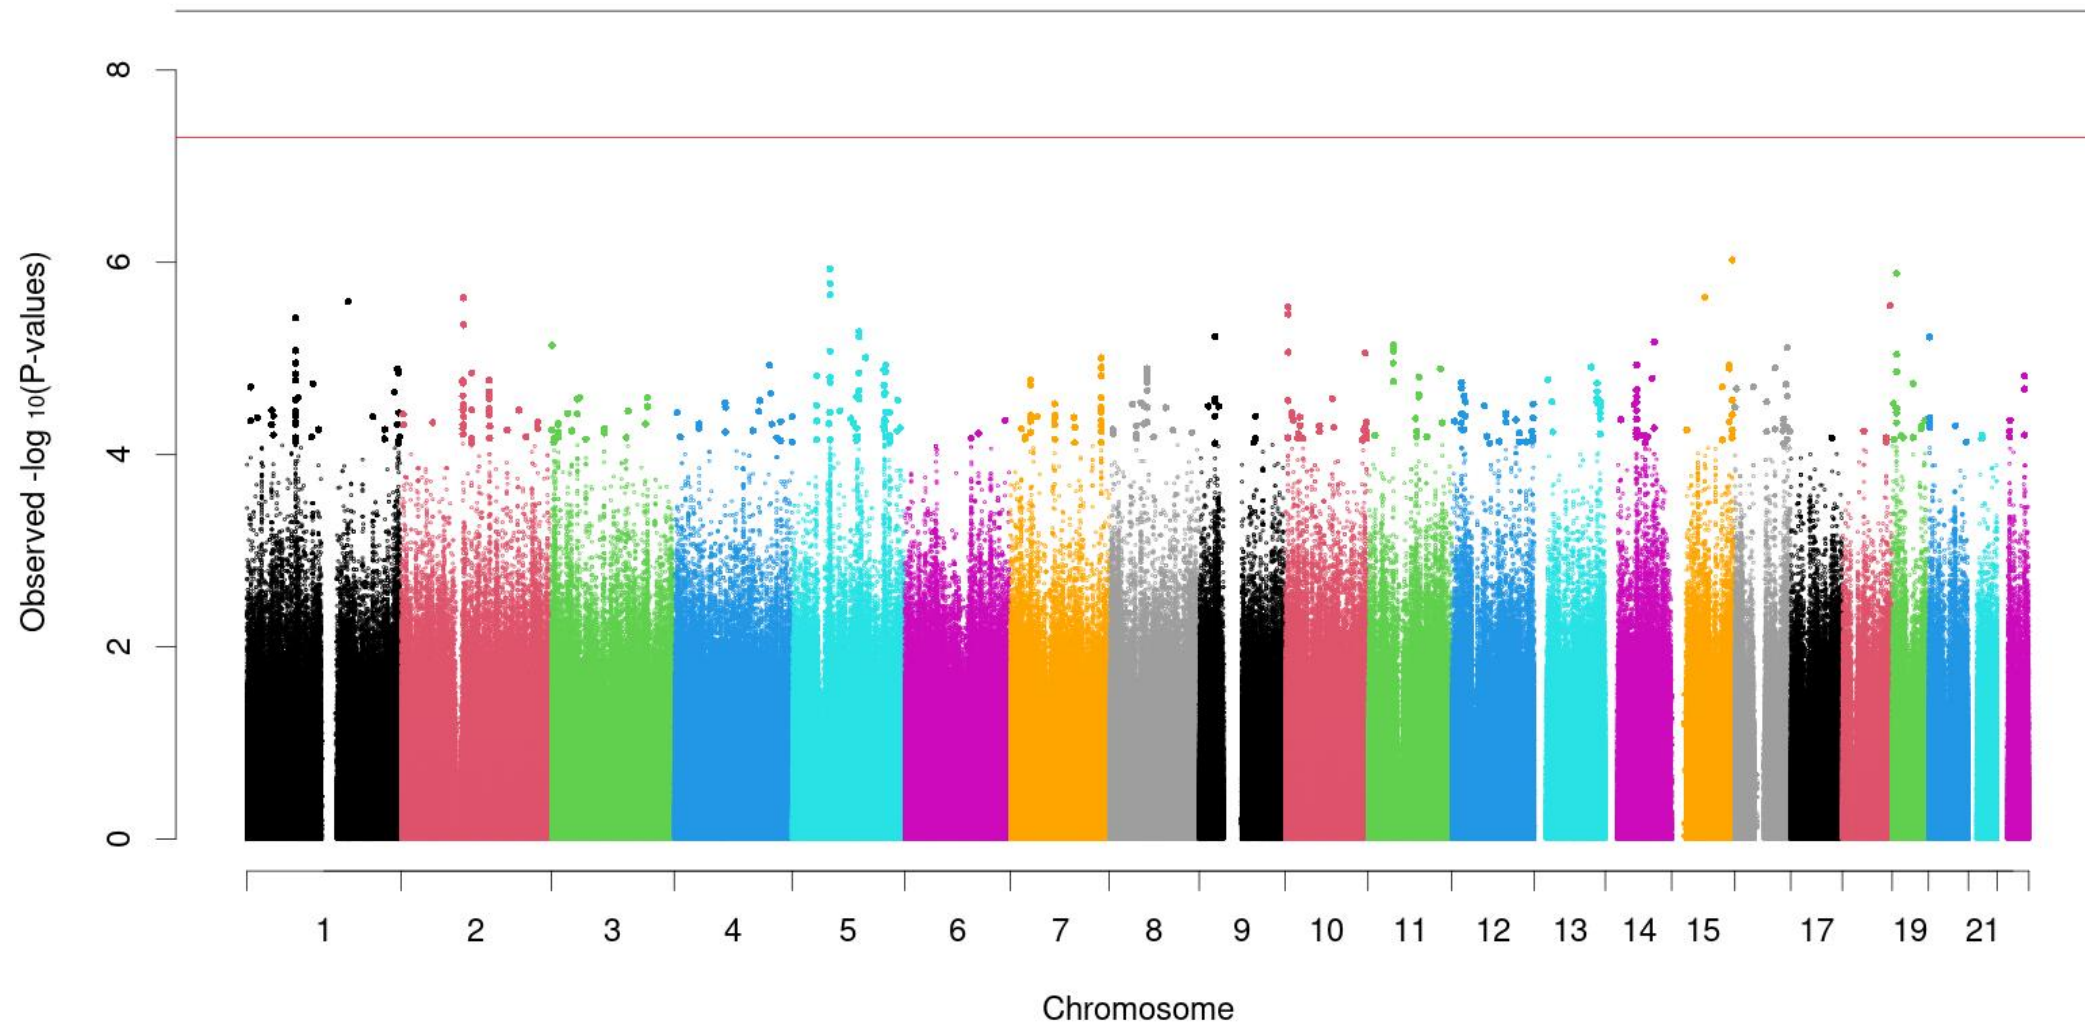

Manhattan plot for mz145.0618\_t22.9, glutamine

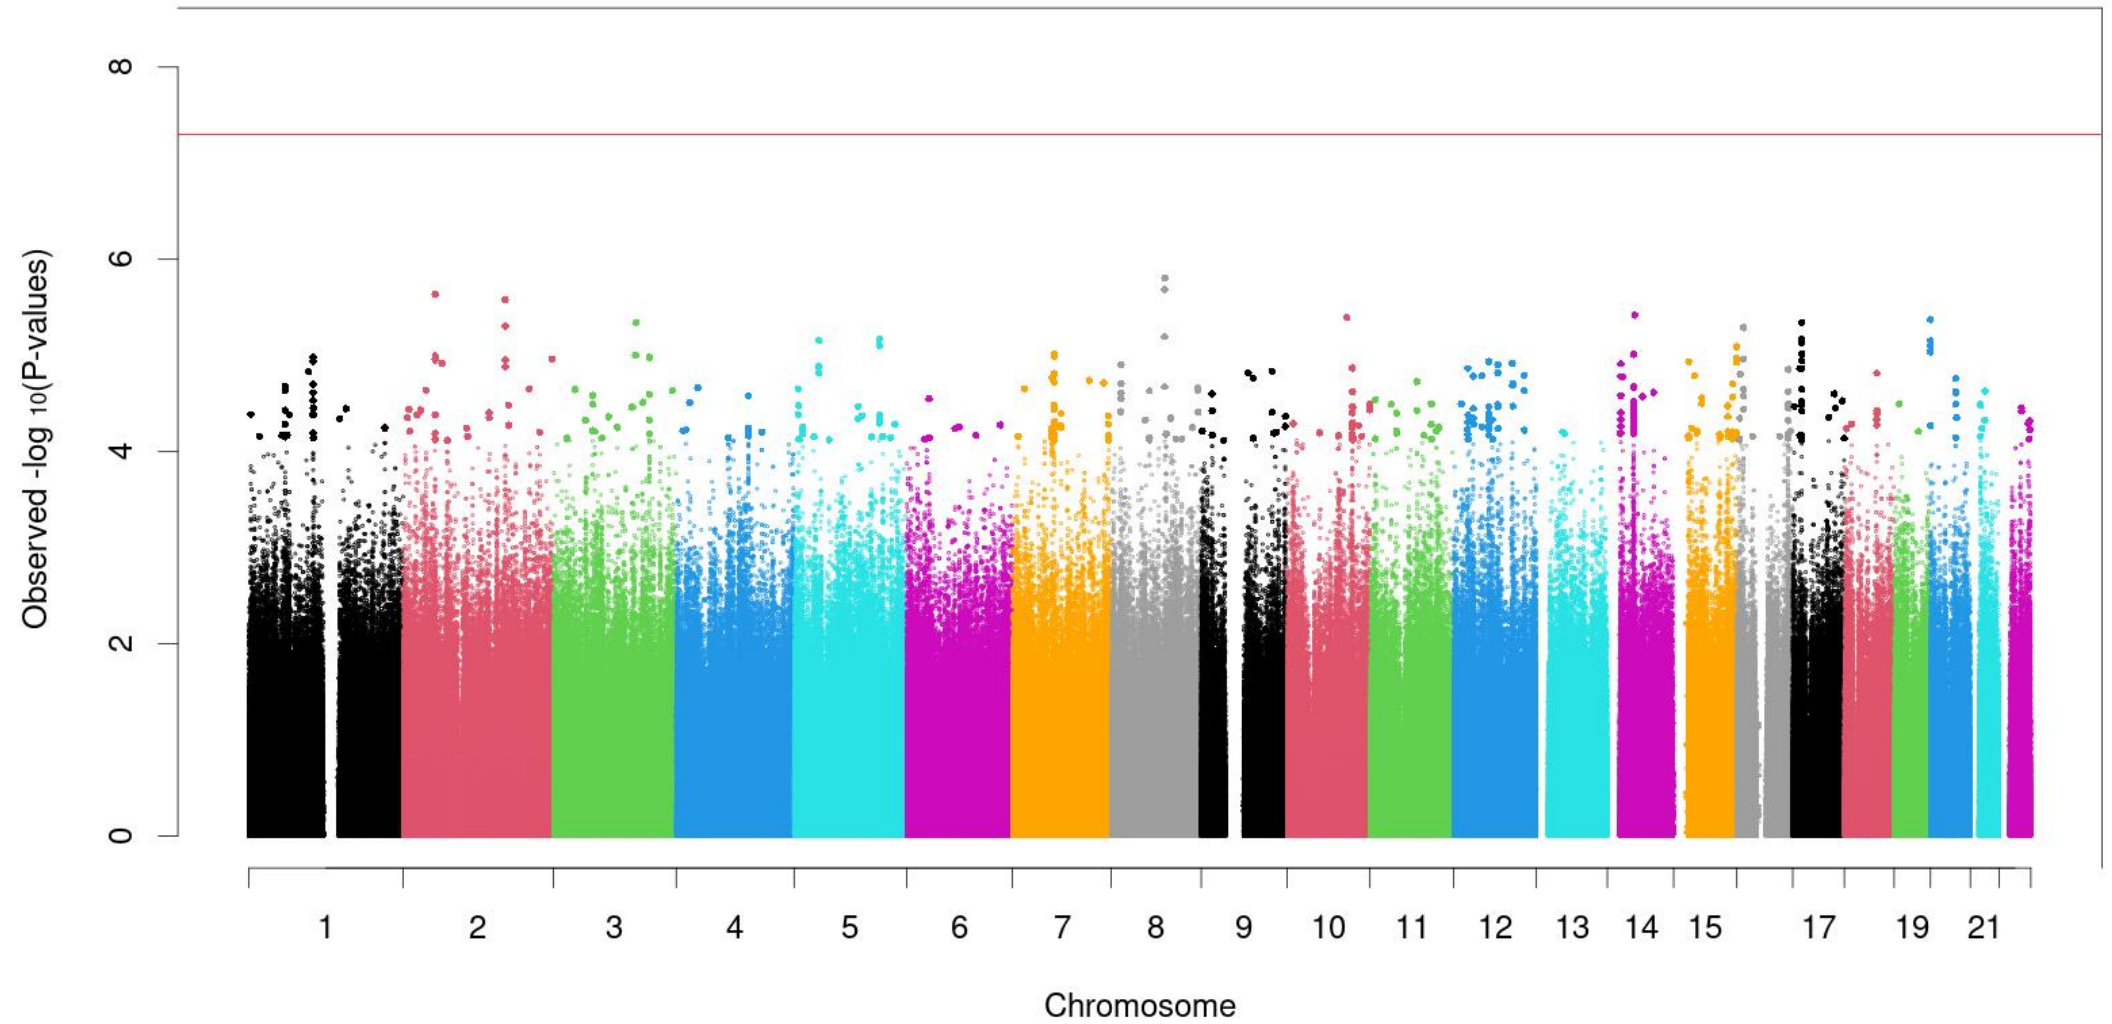



Manhattan plot for mz145.0982\_t37, lysine

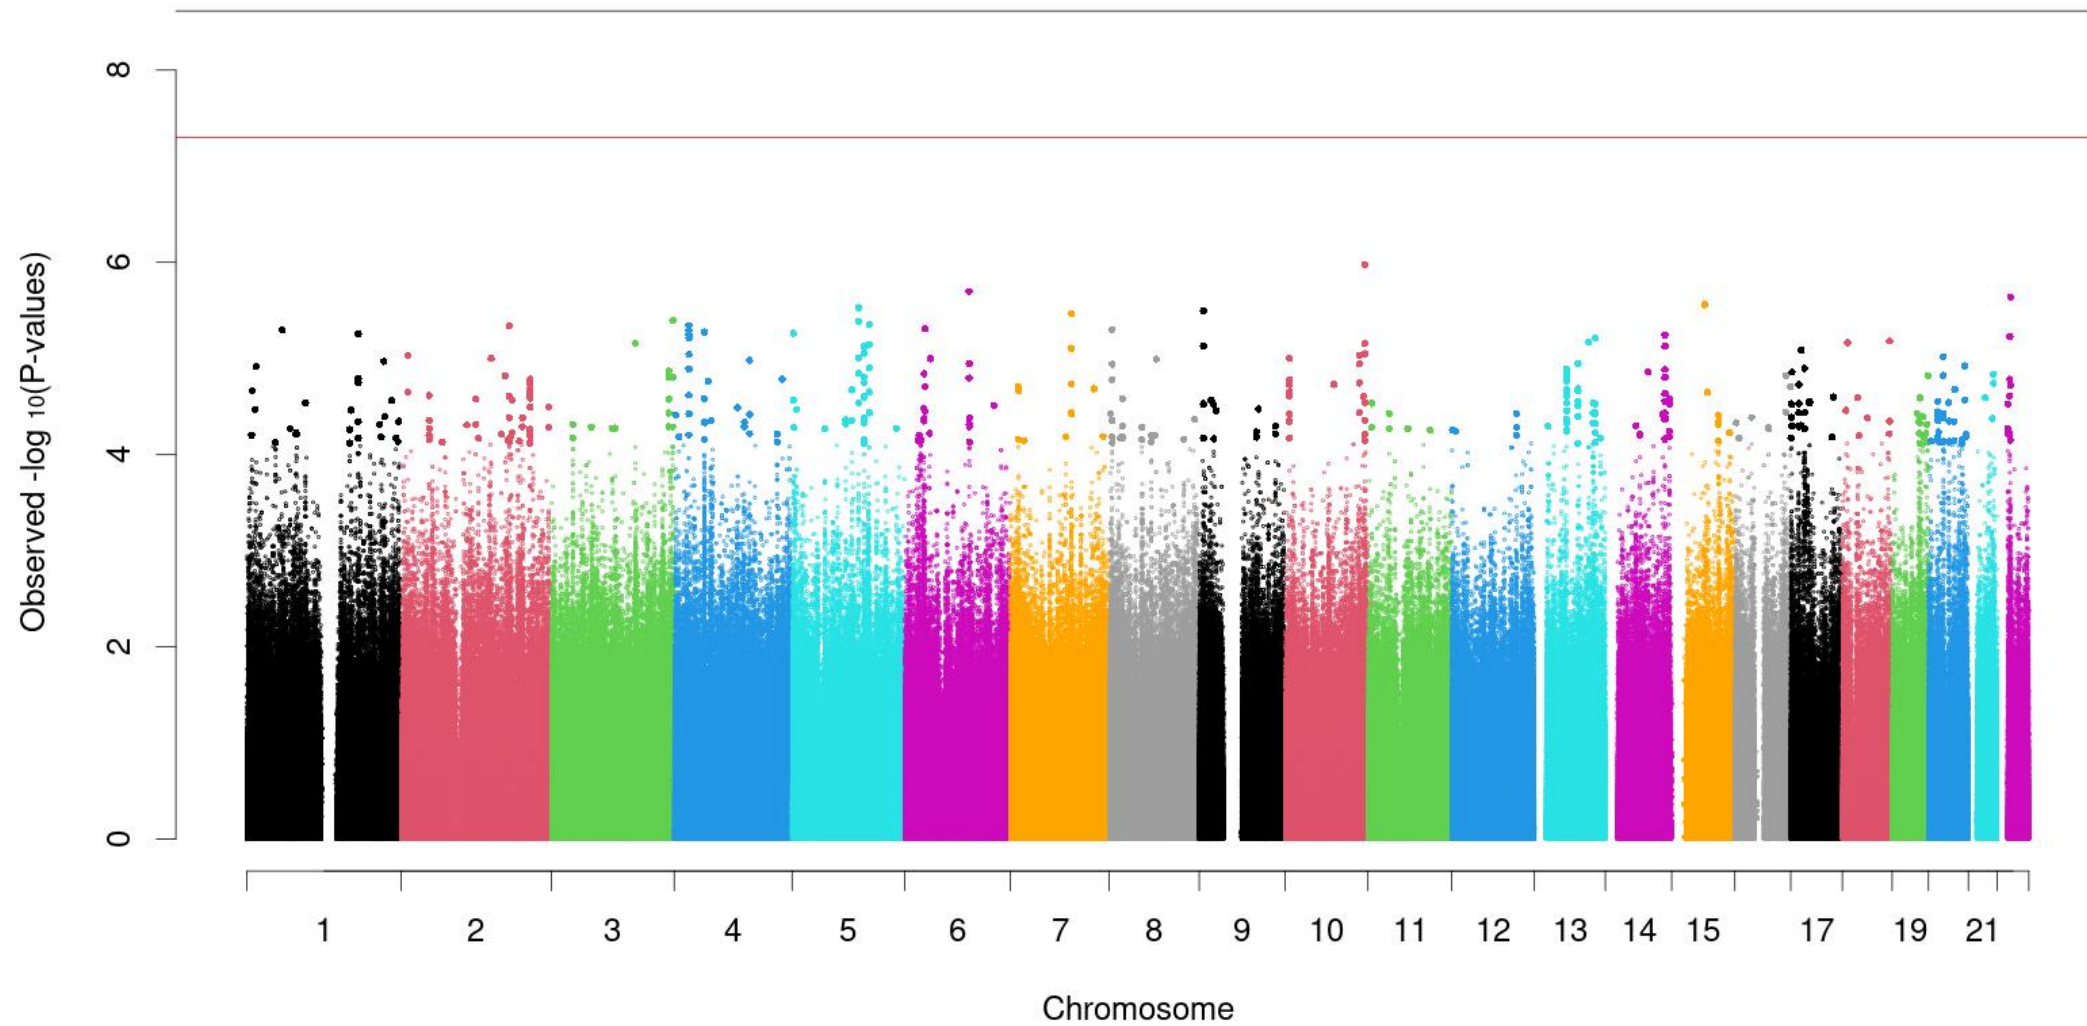

Manhattan plot for mz147.045\_t46.9, trans-cinnamate

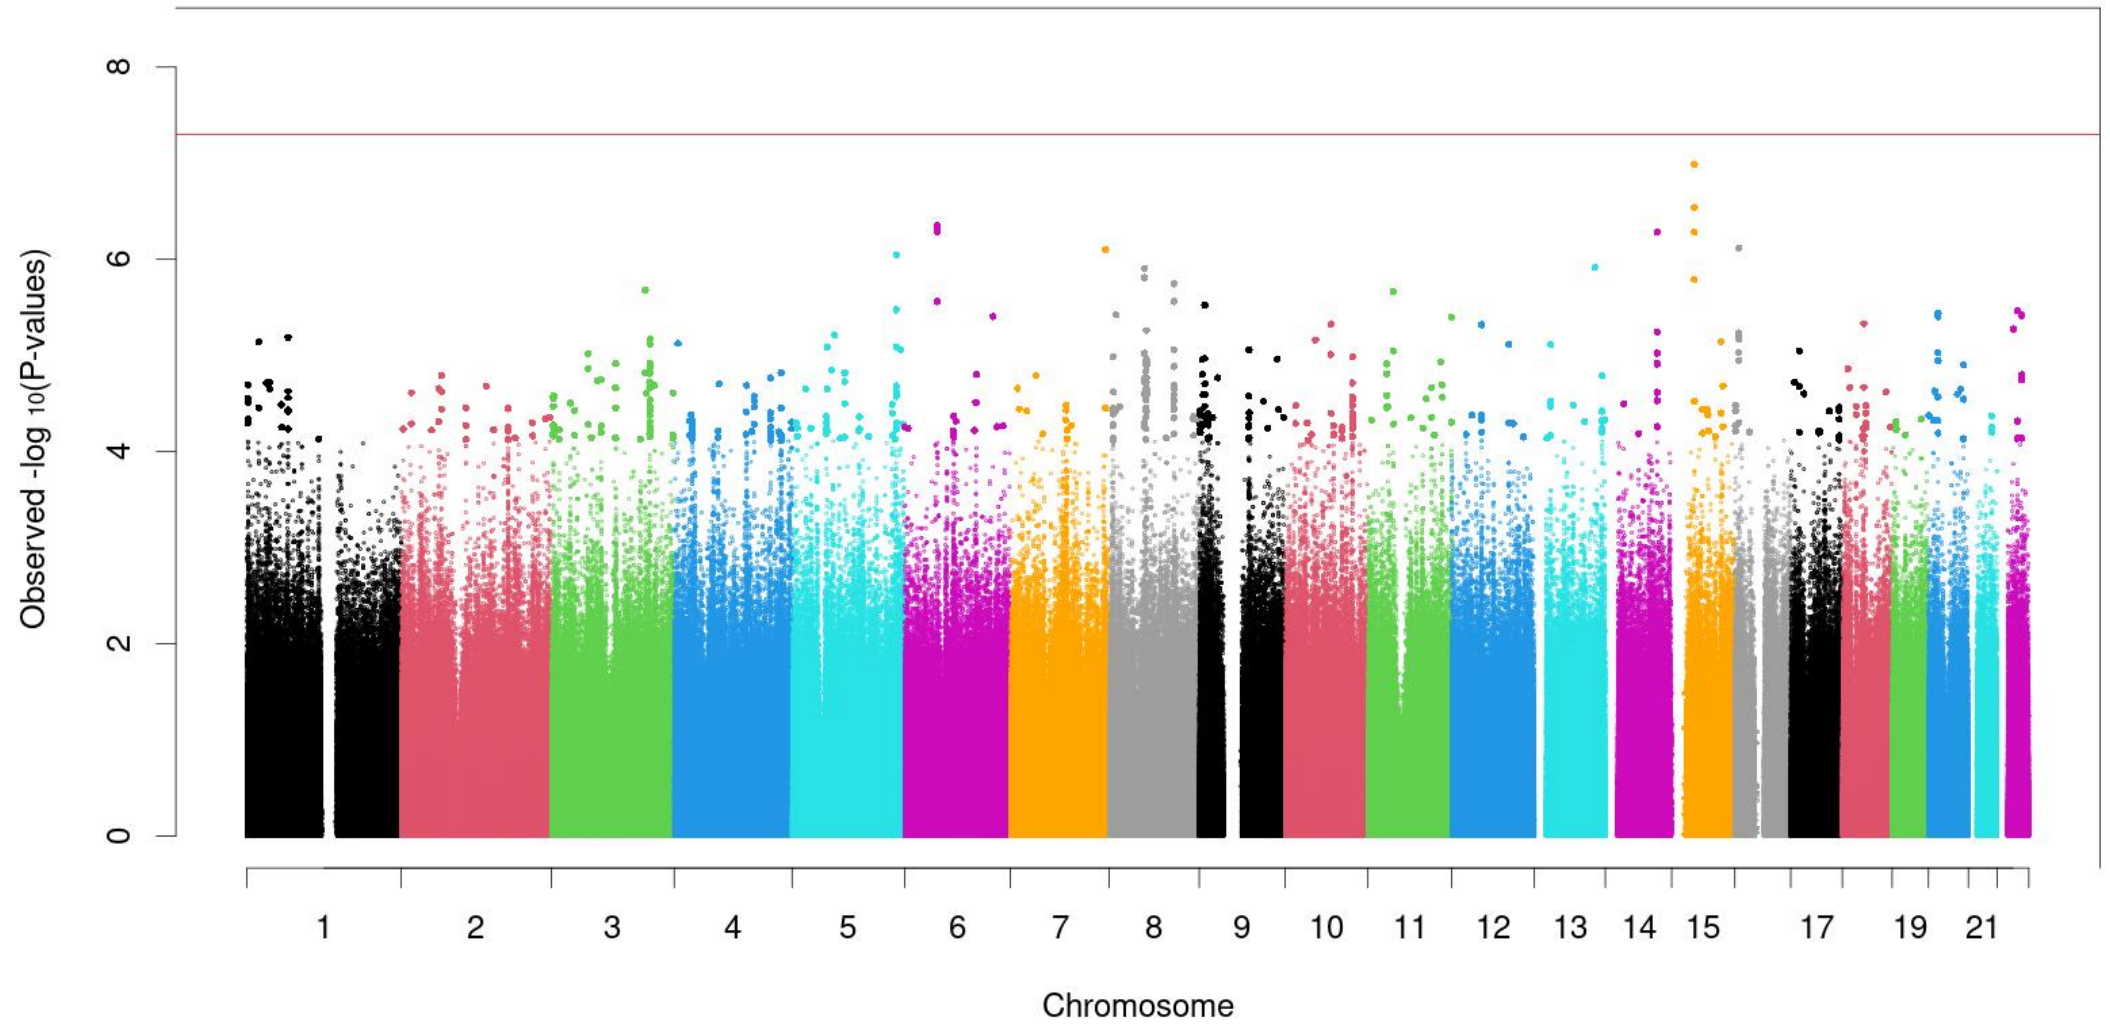

Manhattan plot for mz147.0298\_t23.1, citramalate

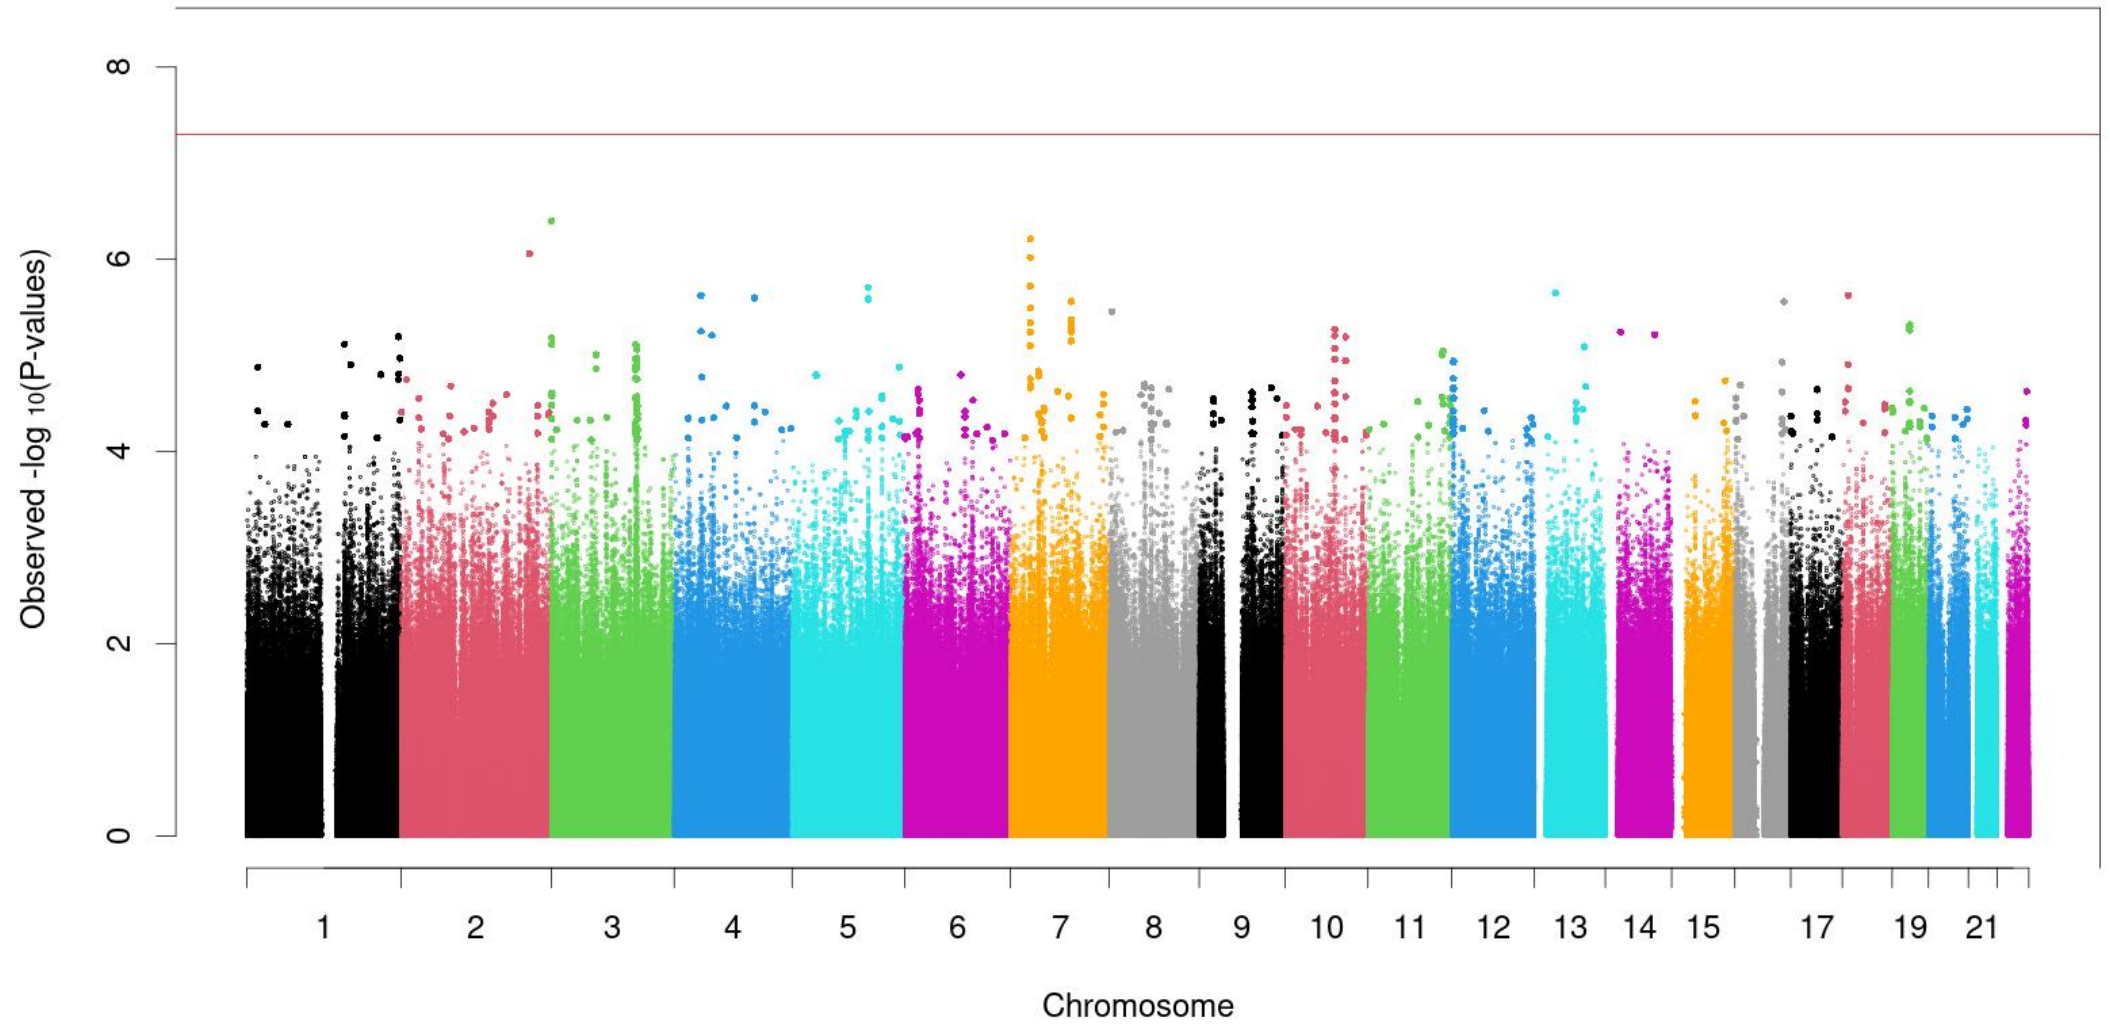



Manhattan plot for mz147.0661\_t24.1, (rs)-mevalonic acid lithium salt

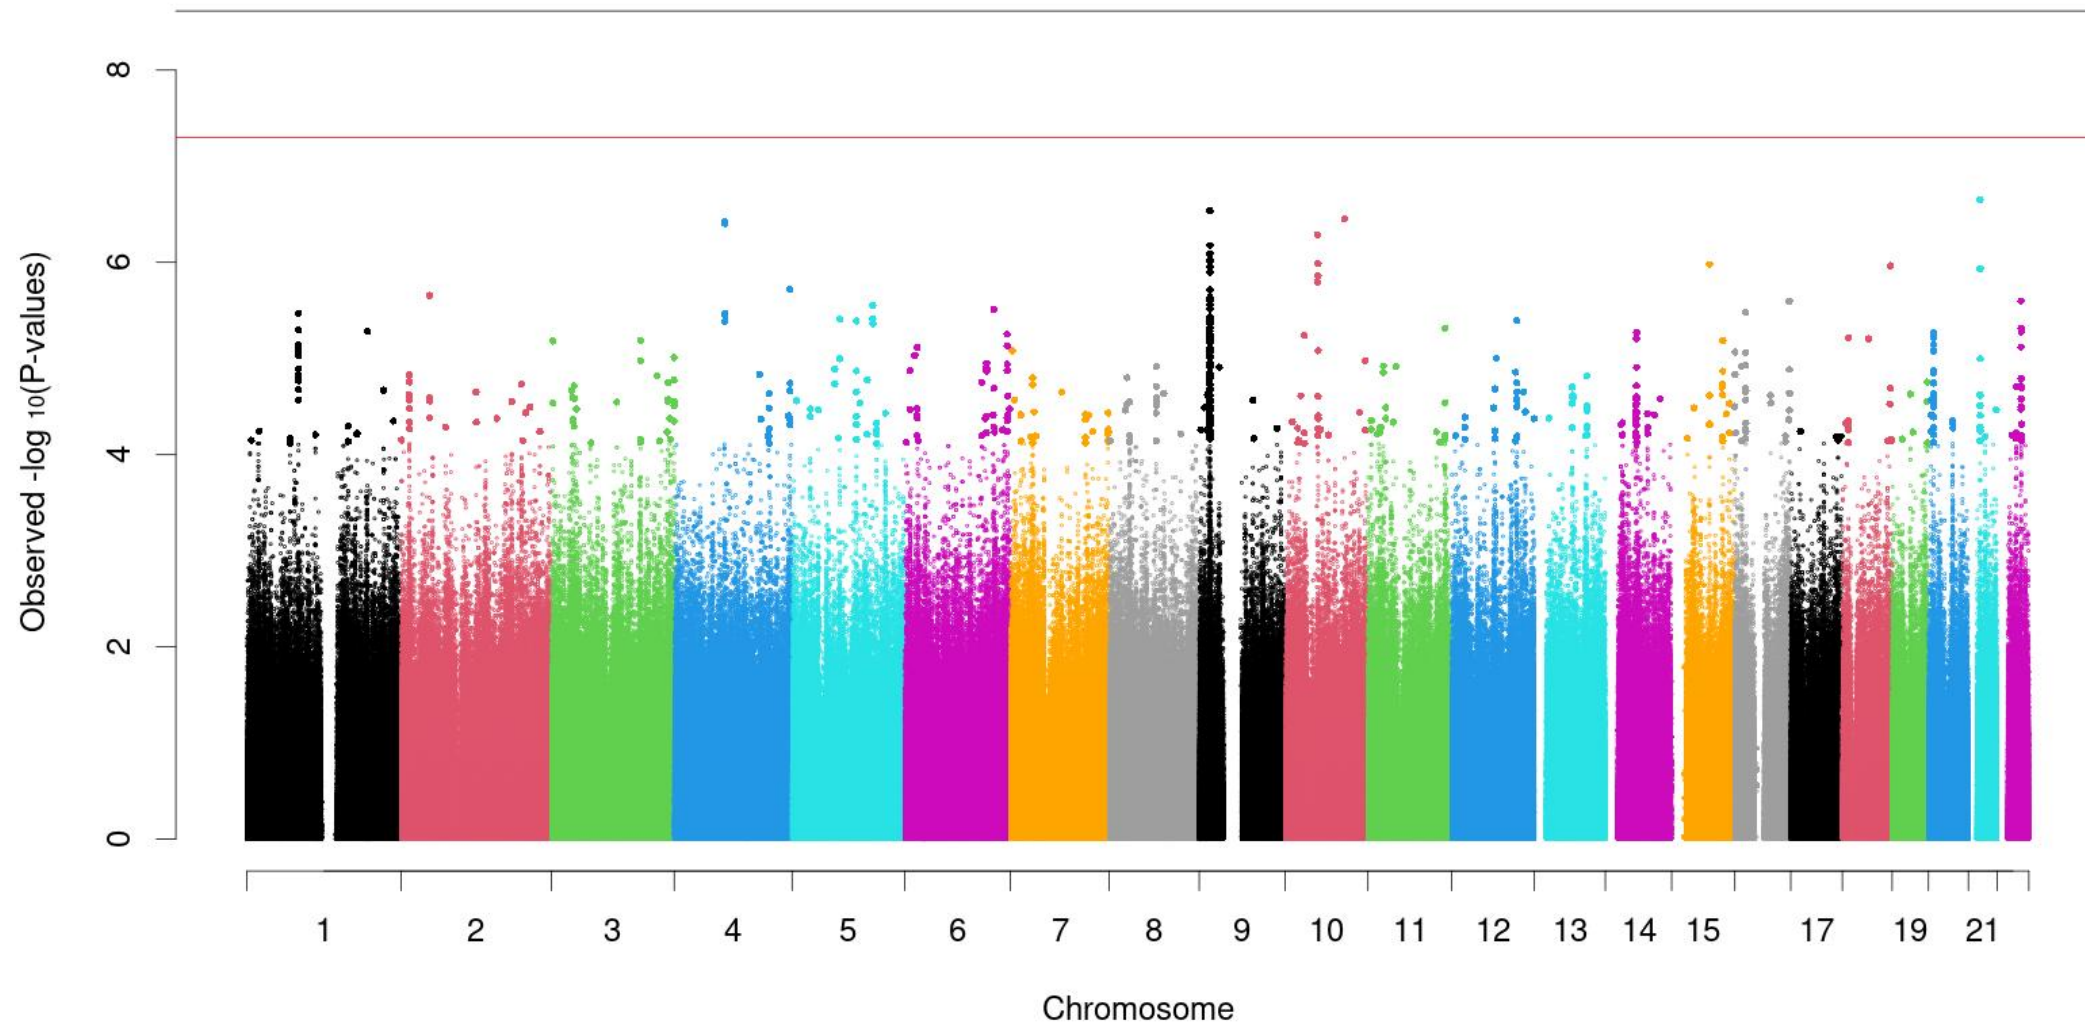

Manhattan plot for mz147.0764\_t81.7, glutamine

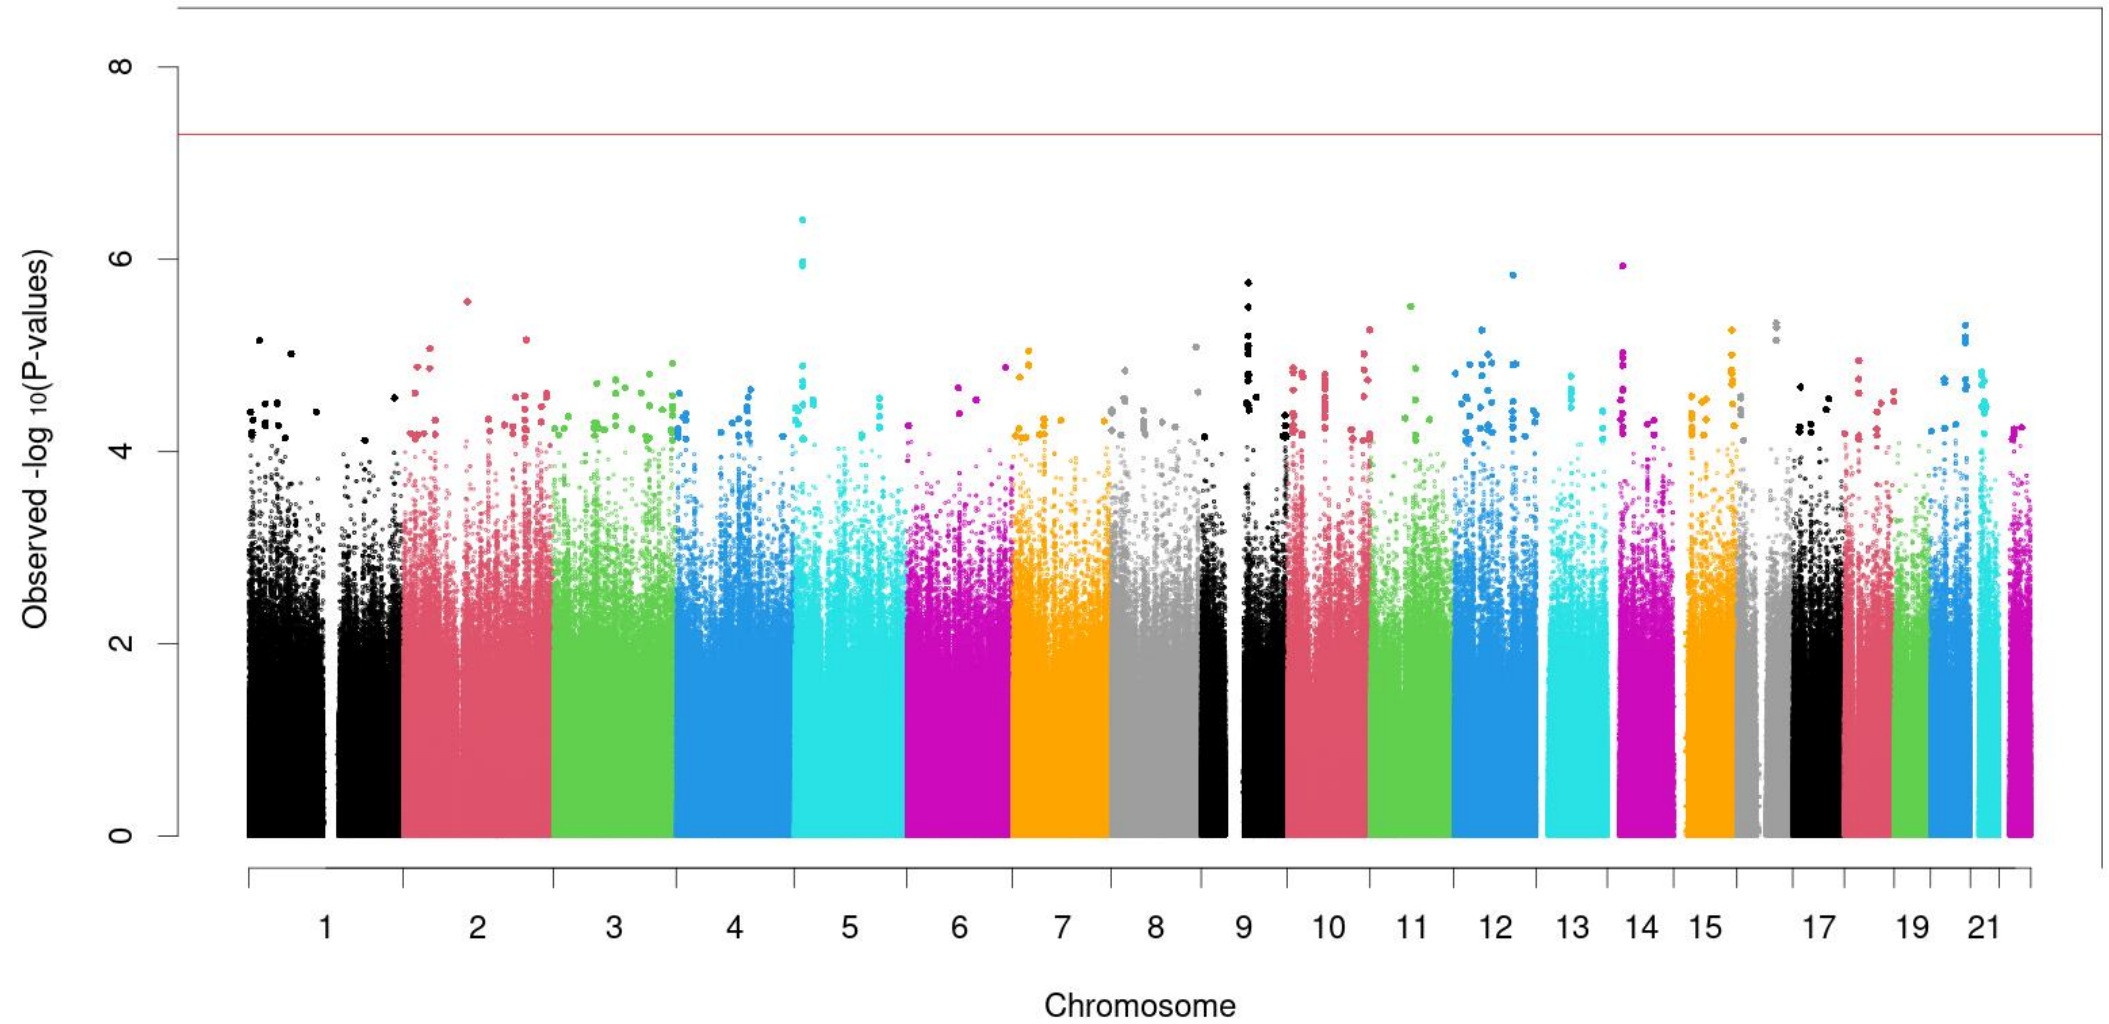

Manhattan plot for mz148.0437\_t35.7, methionine

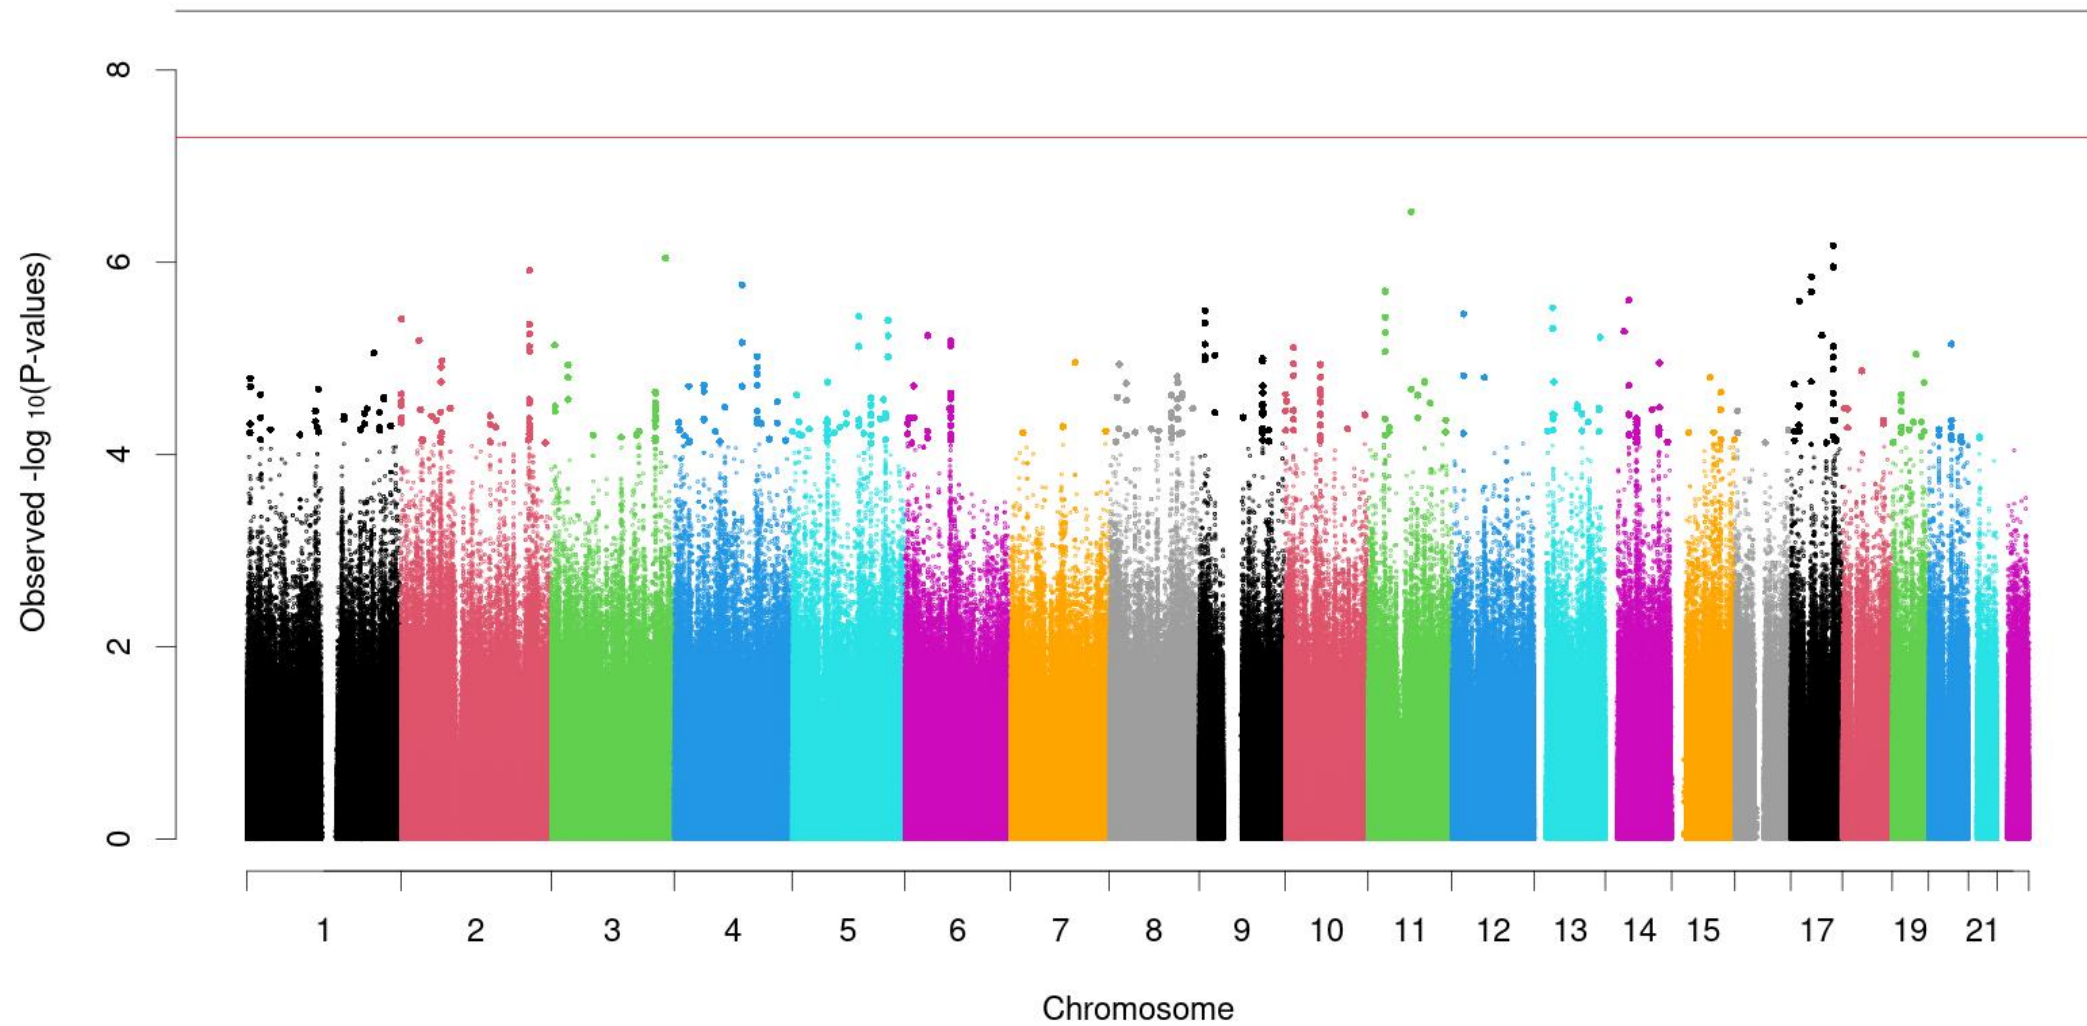



Manhattan plot for mz148.0757\_t44.7, 3-methyl-2-oxindole

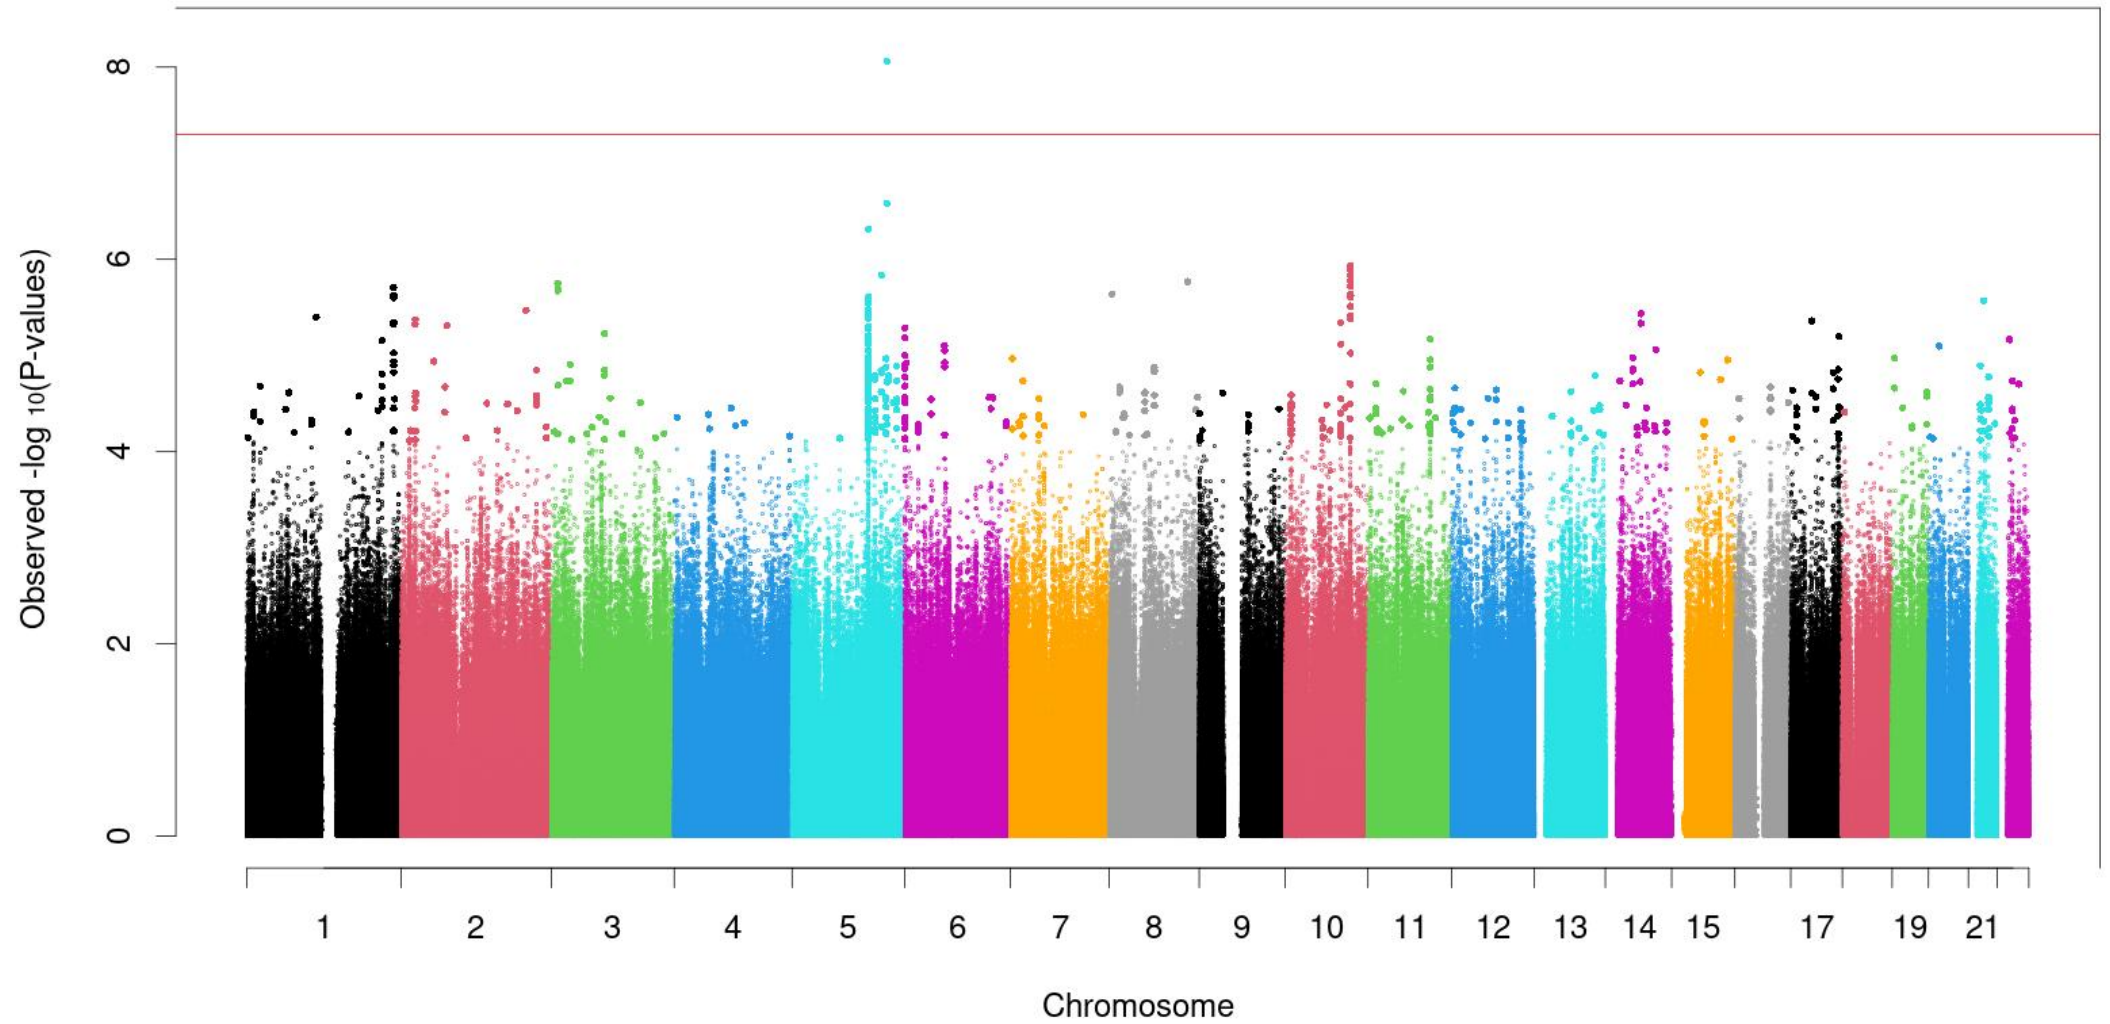

Manhattan plot for mz149.0278\_t28.8, 2-hydroxy-4-(methylthio)butyric acid

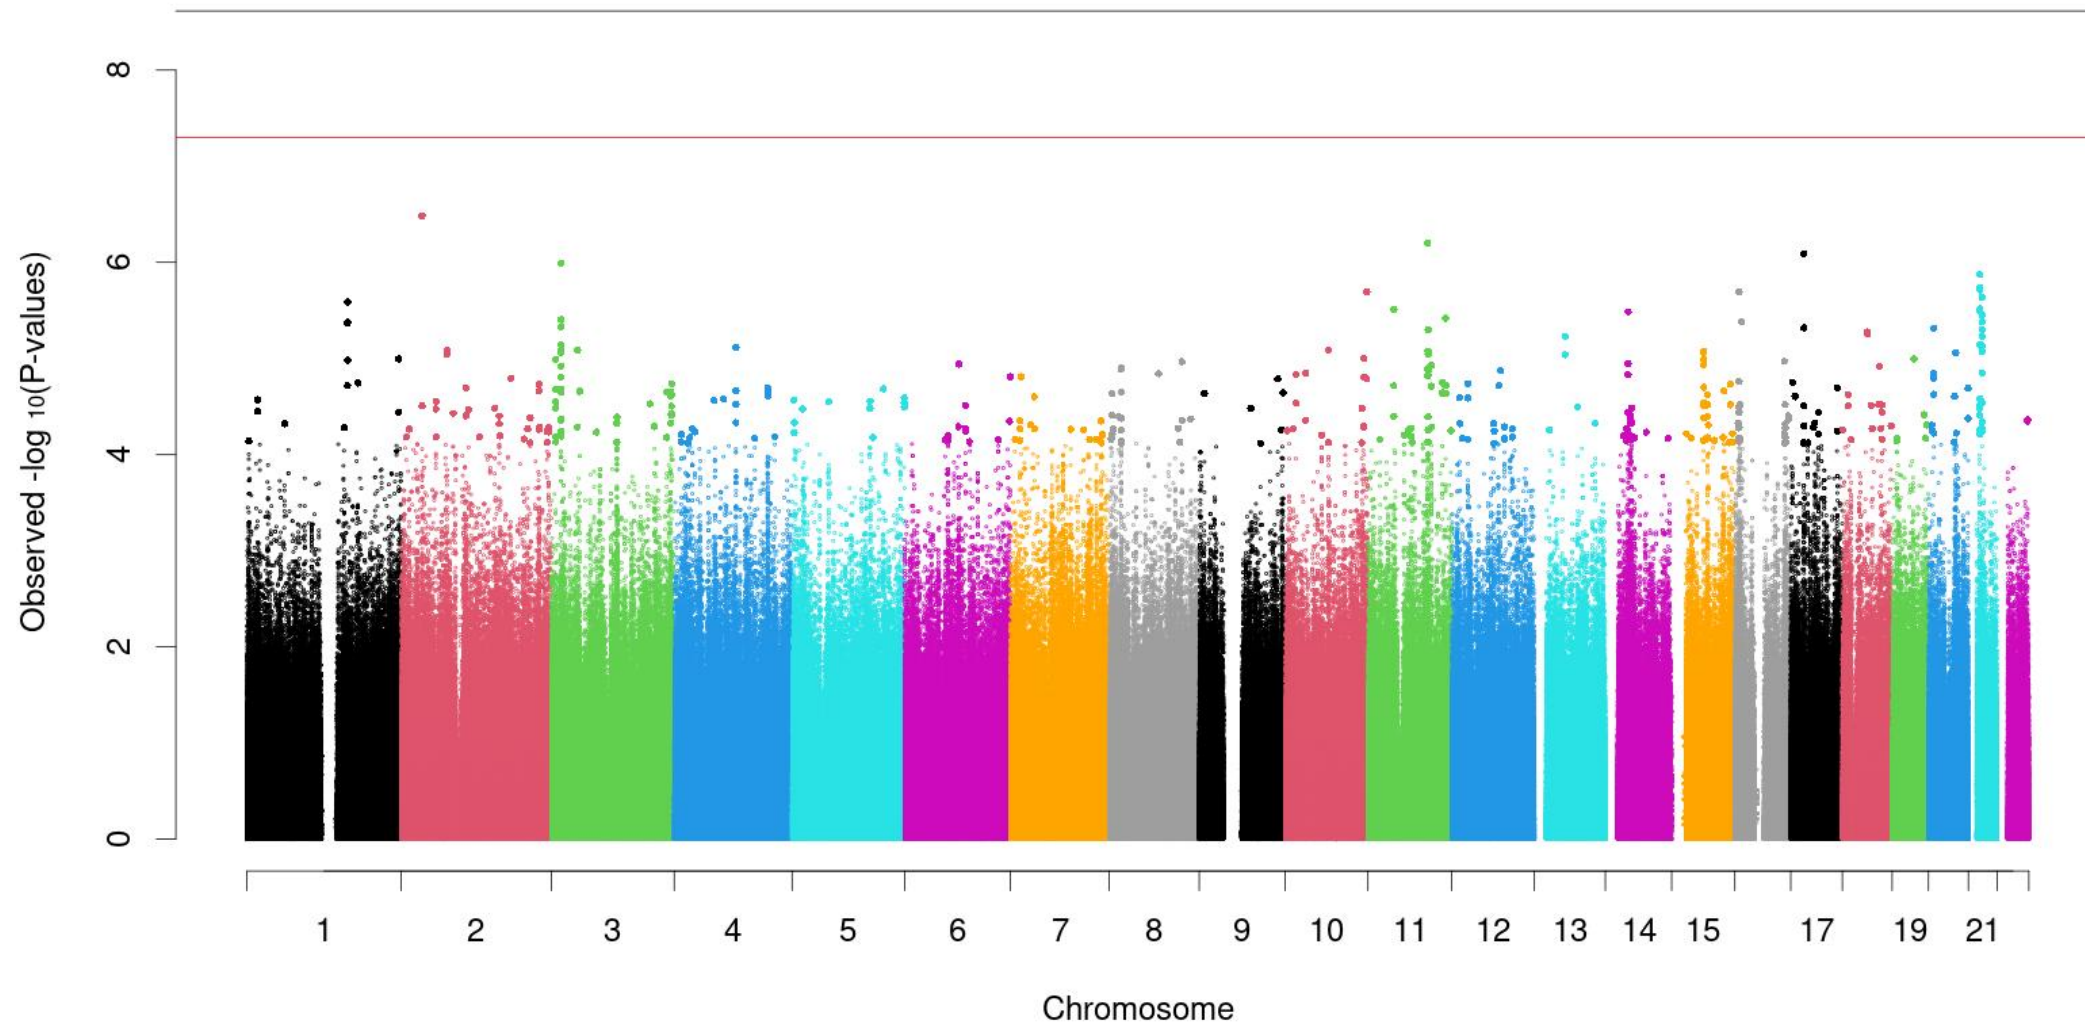

Manhattan plot for mz150.0583\_t52.3, methionine

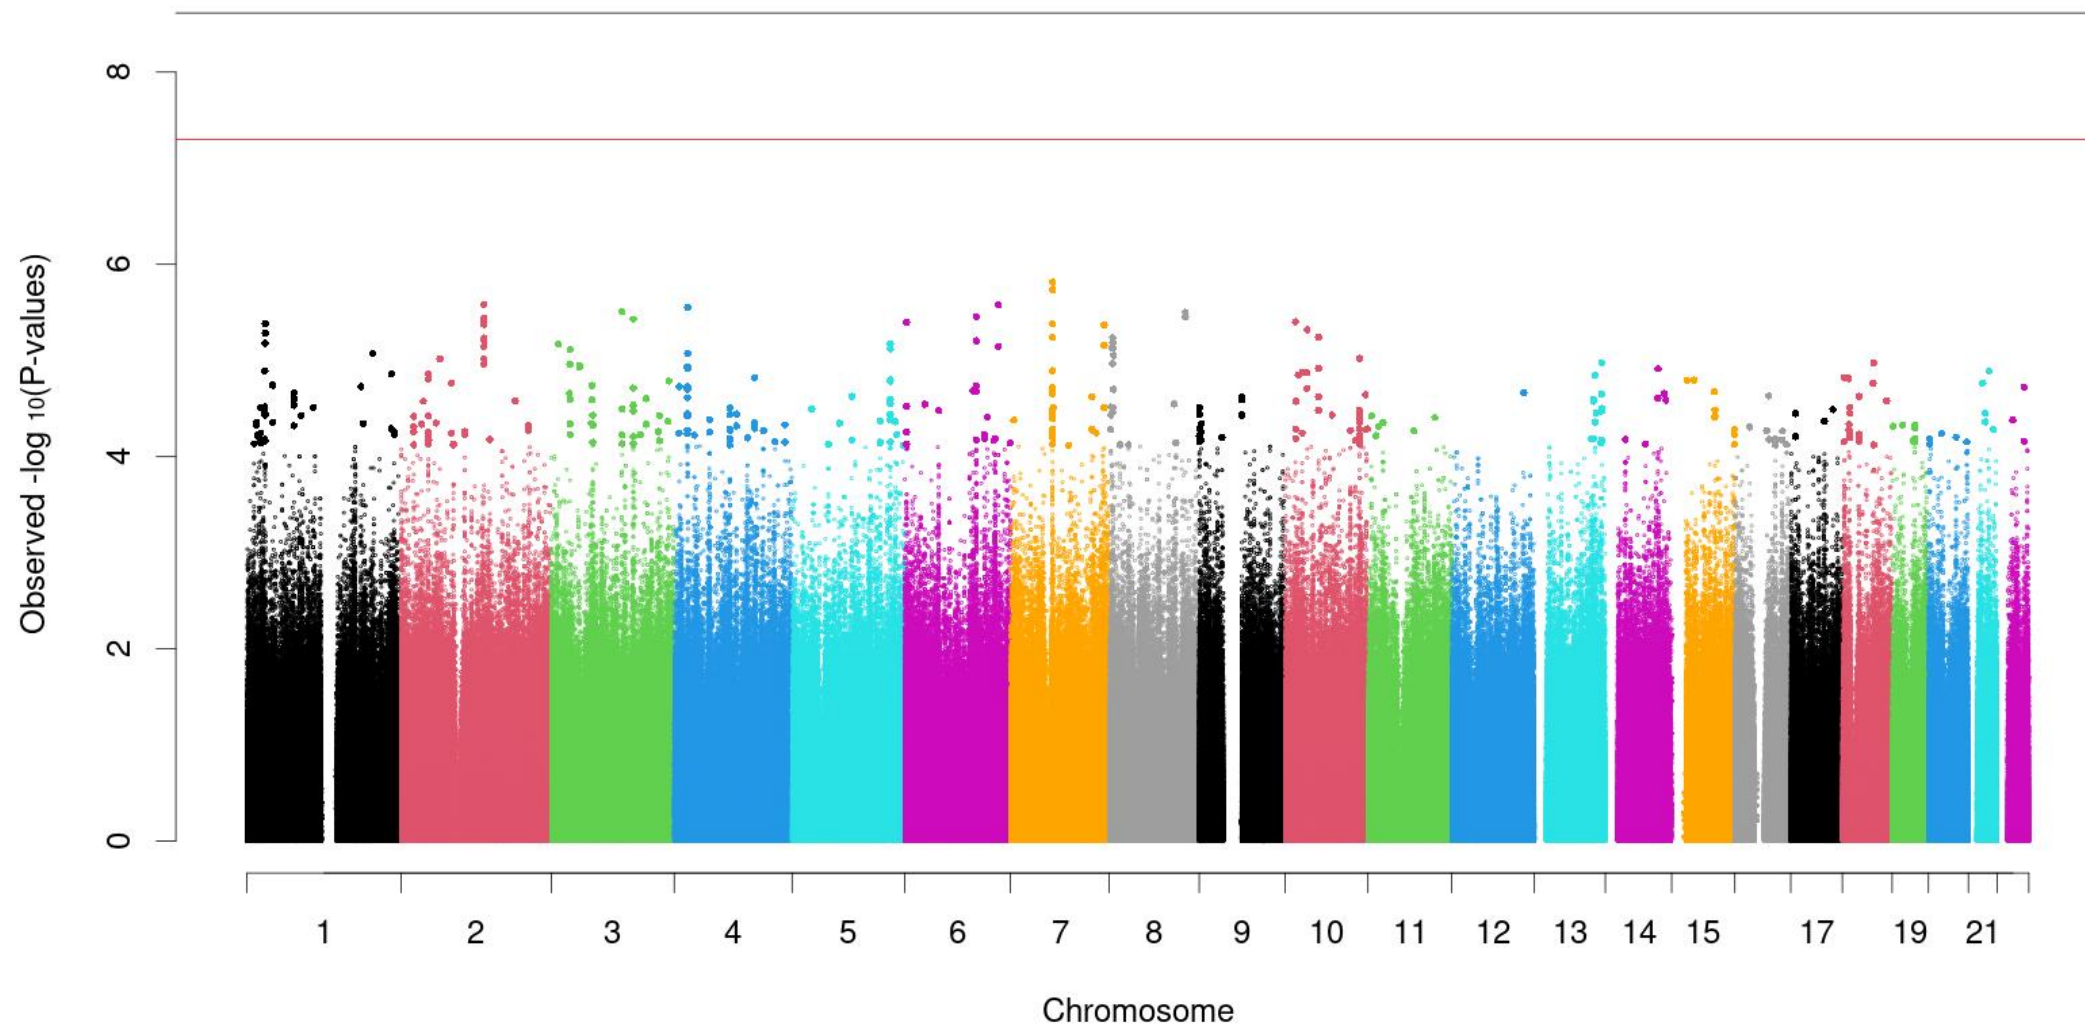



Manhattan plot for mz151.026\_t22.8, xanthine

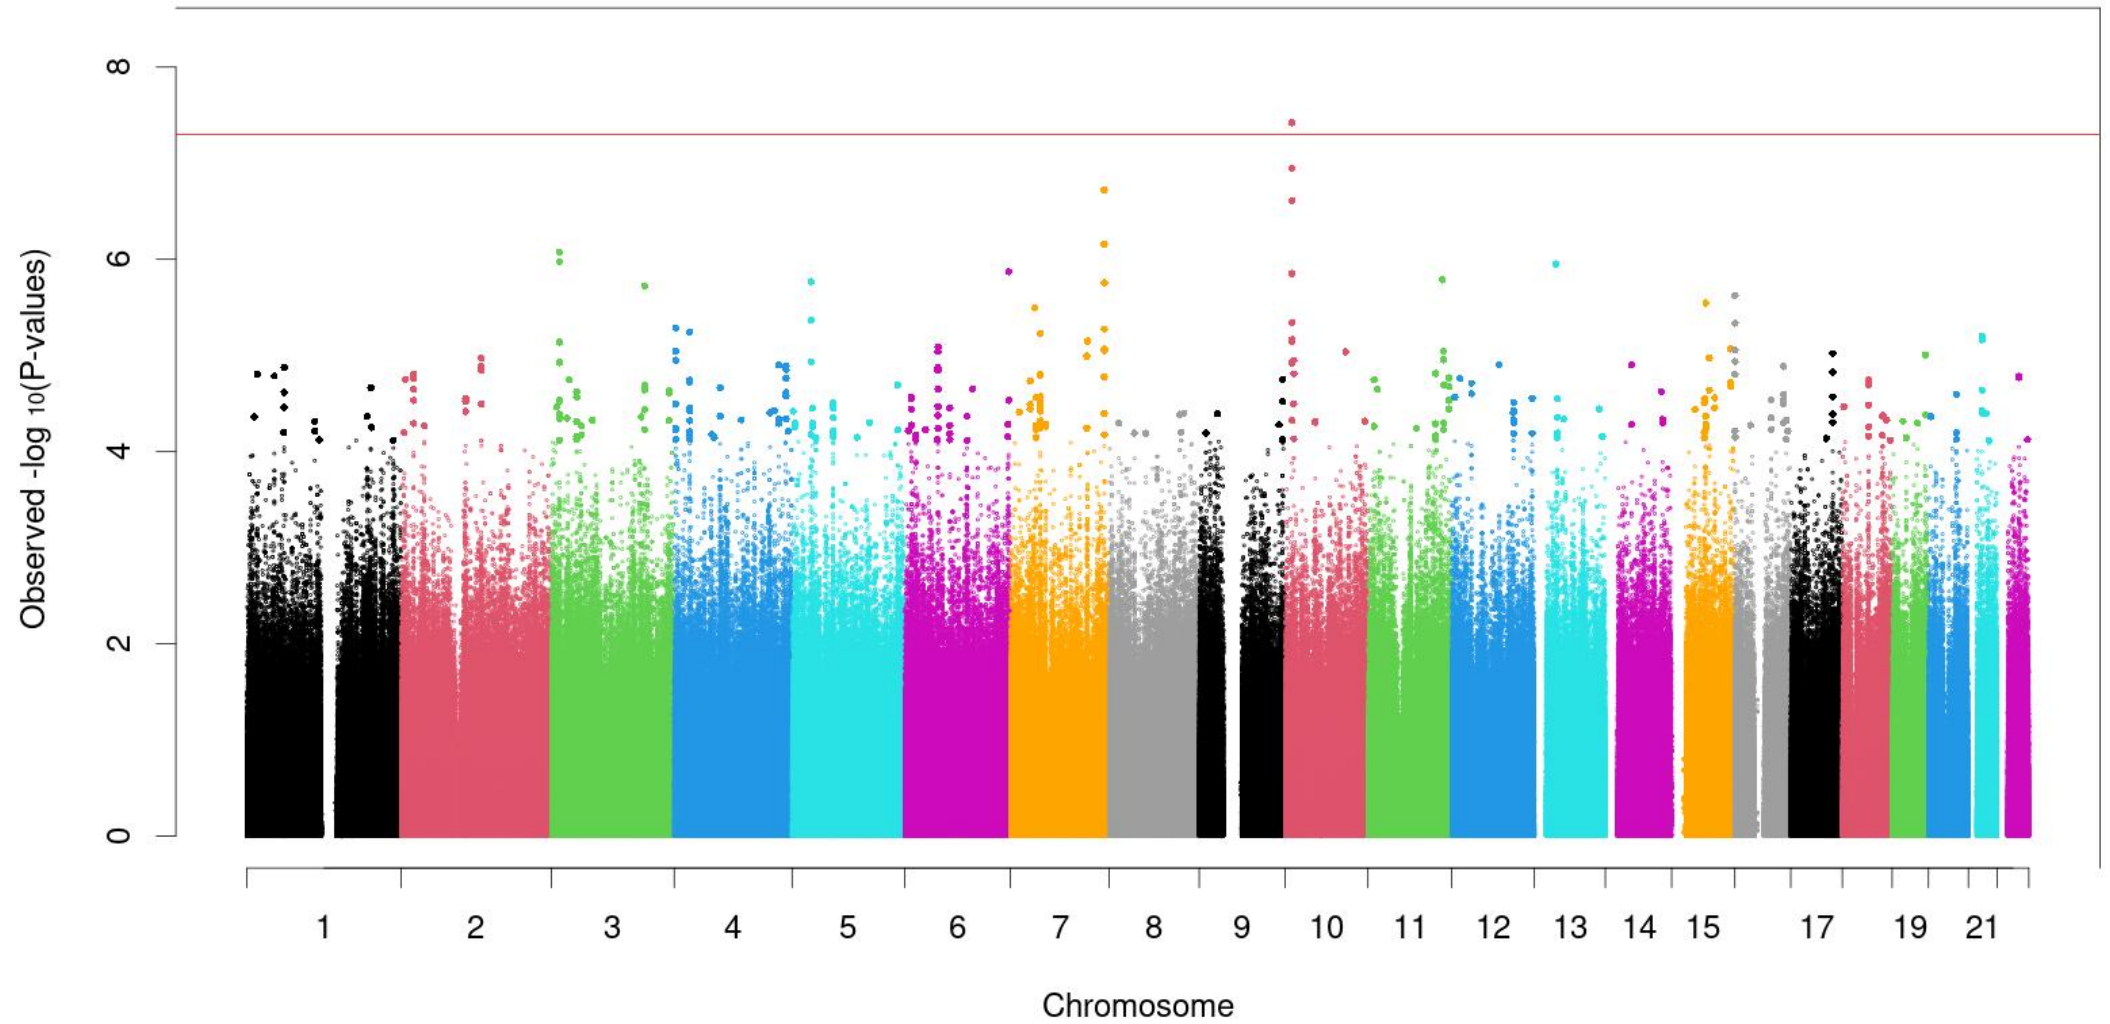

Manhattan plot for mz153.0407\_t42, xanthine

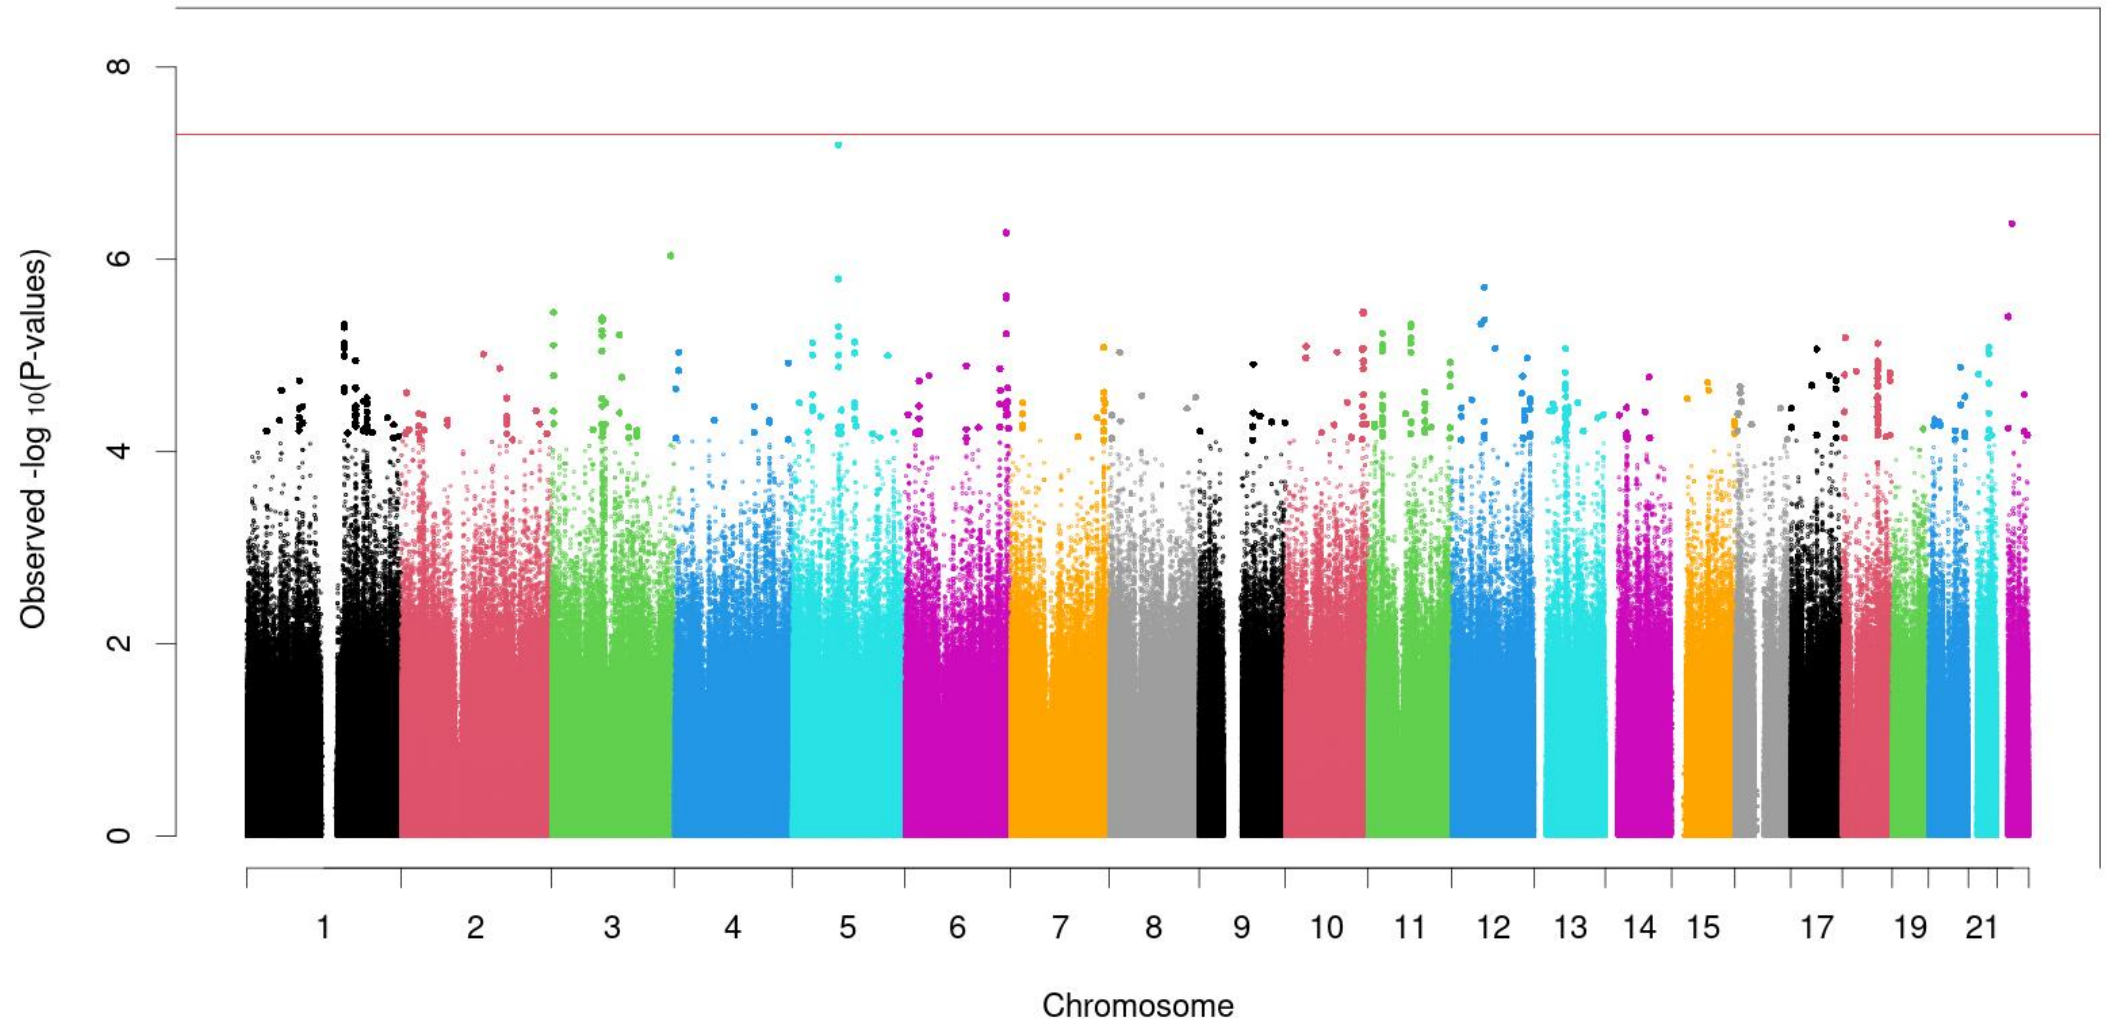

Manhattan plot for mz153.0772\_t51.3, arabitol

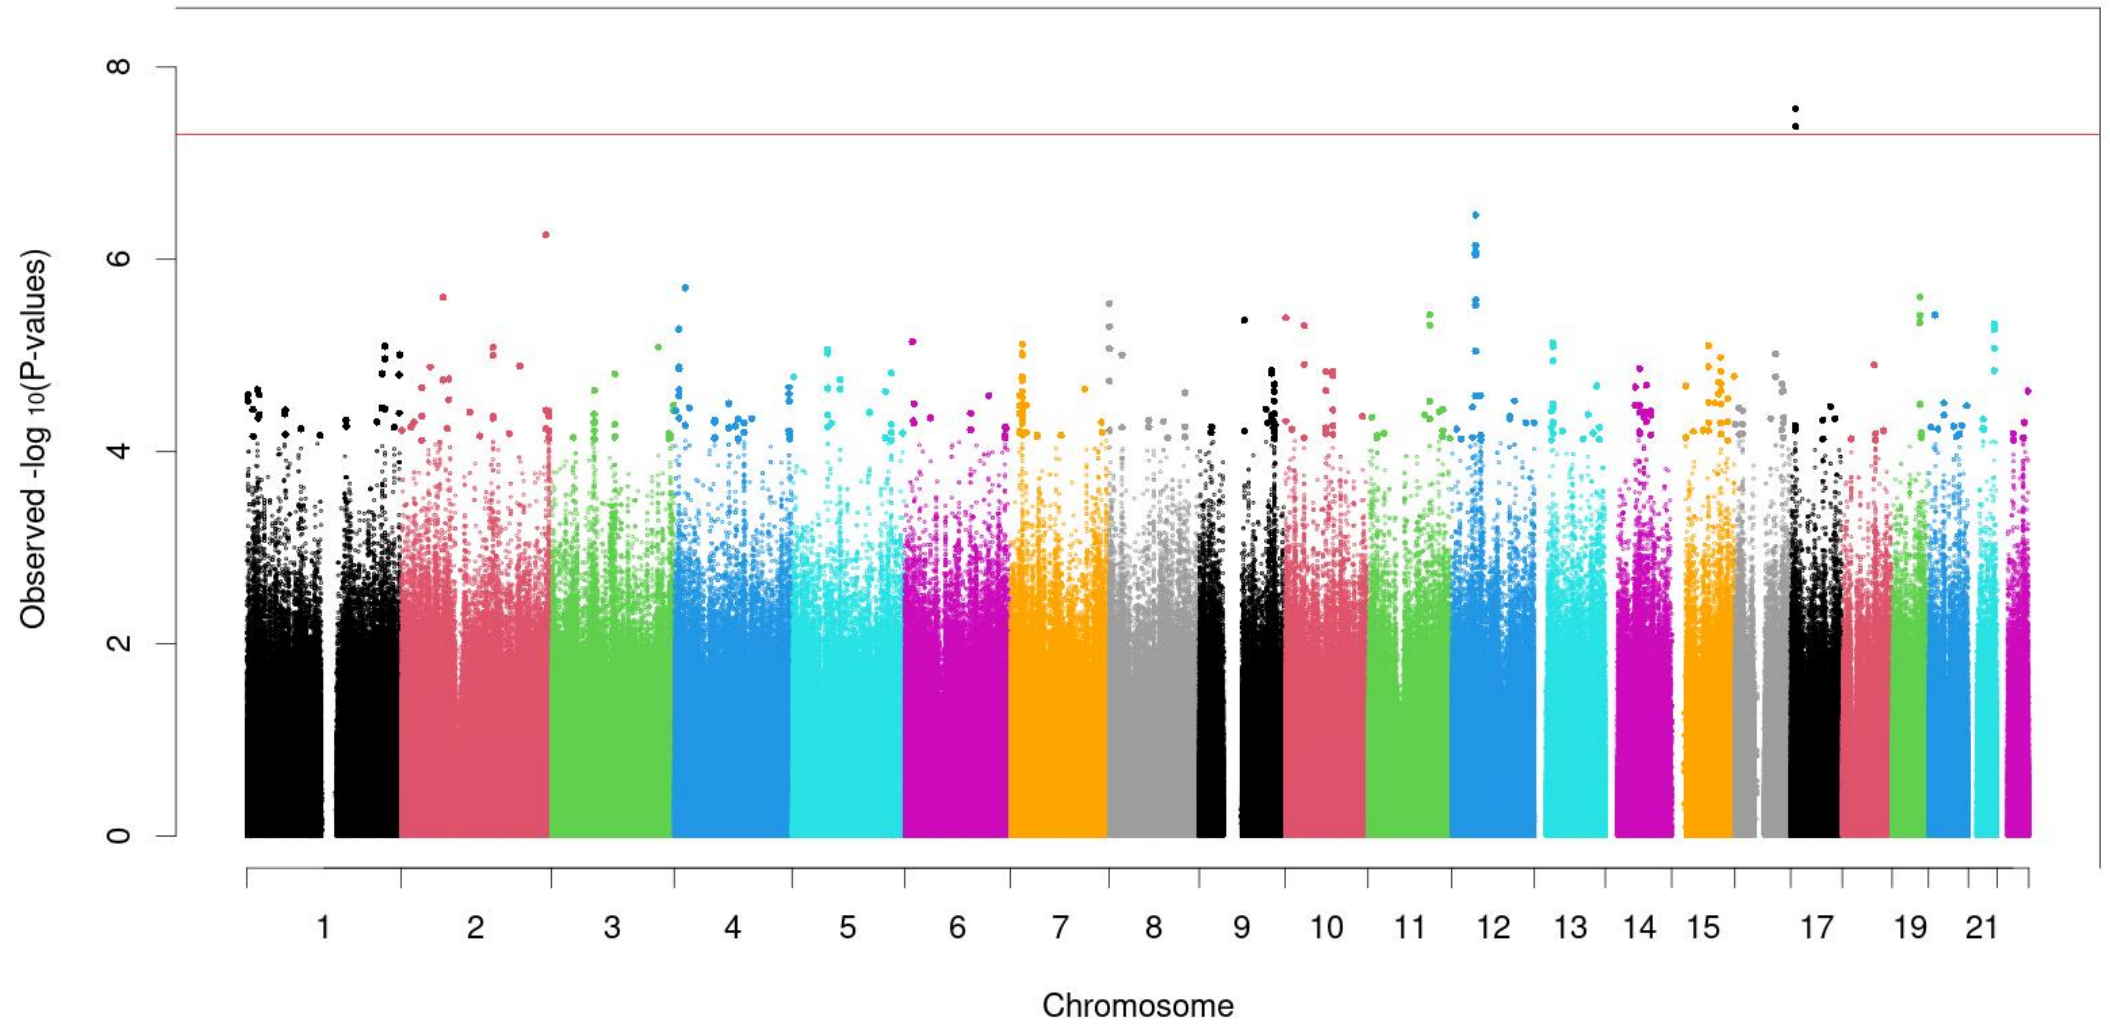



Manhattan plot for mz154.0621\_t21.1, histidine

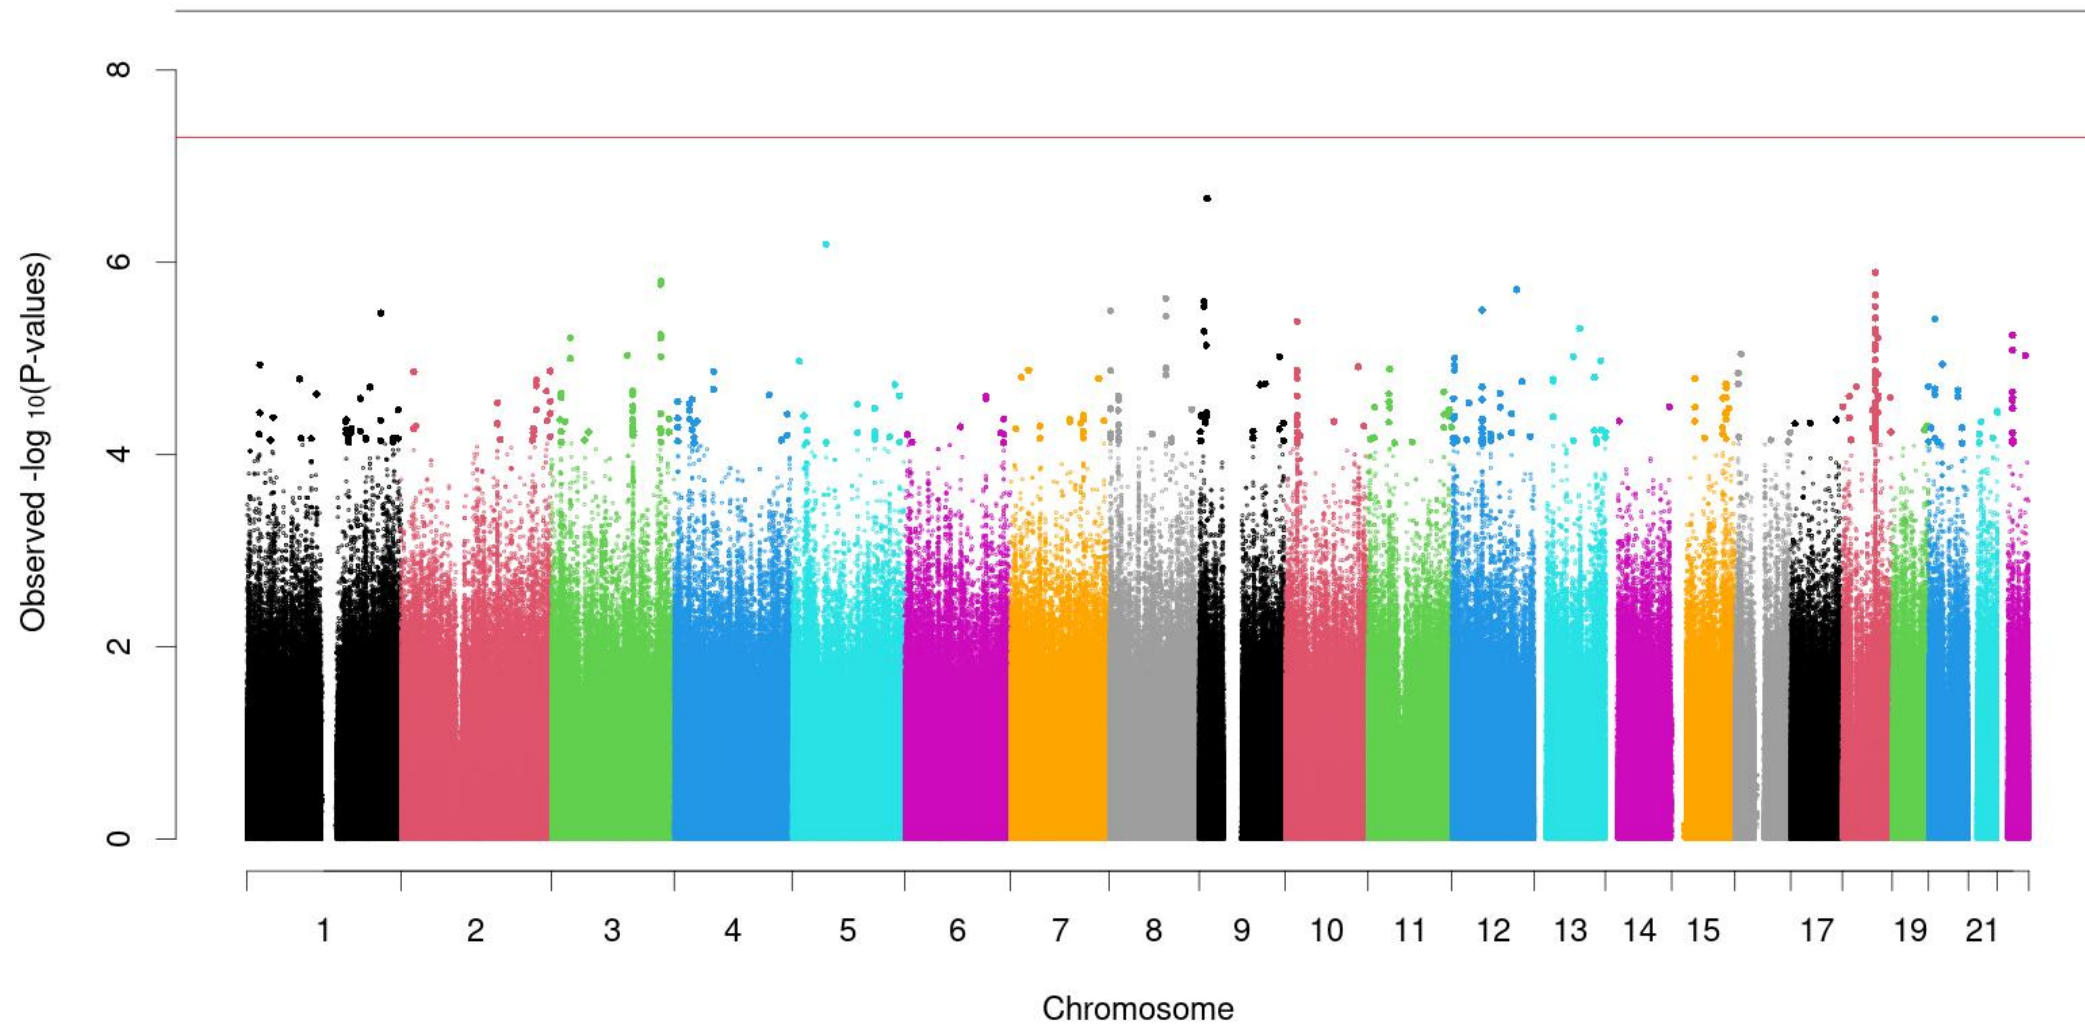

Manhattan plot for mz156.0767\_t105, histidine

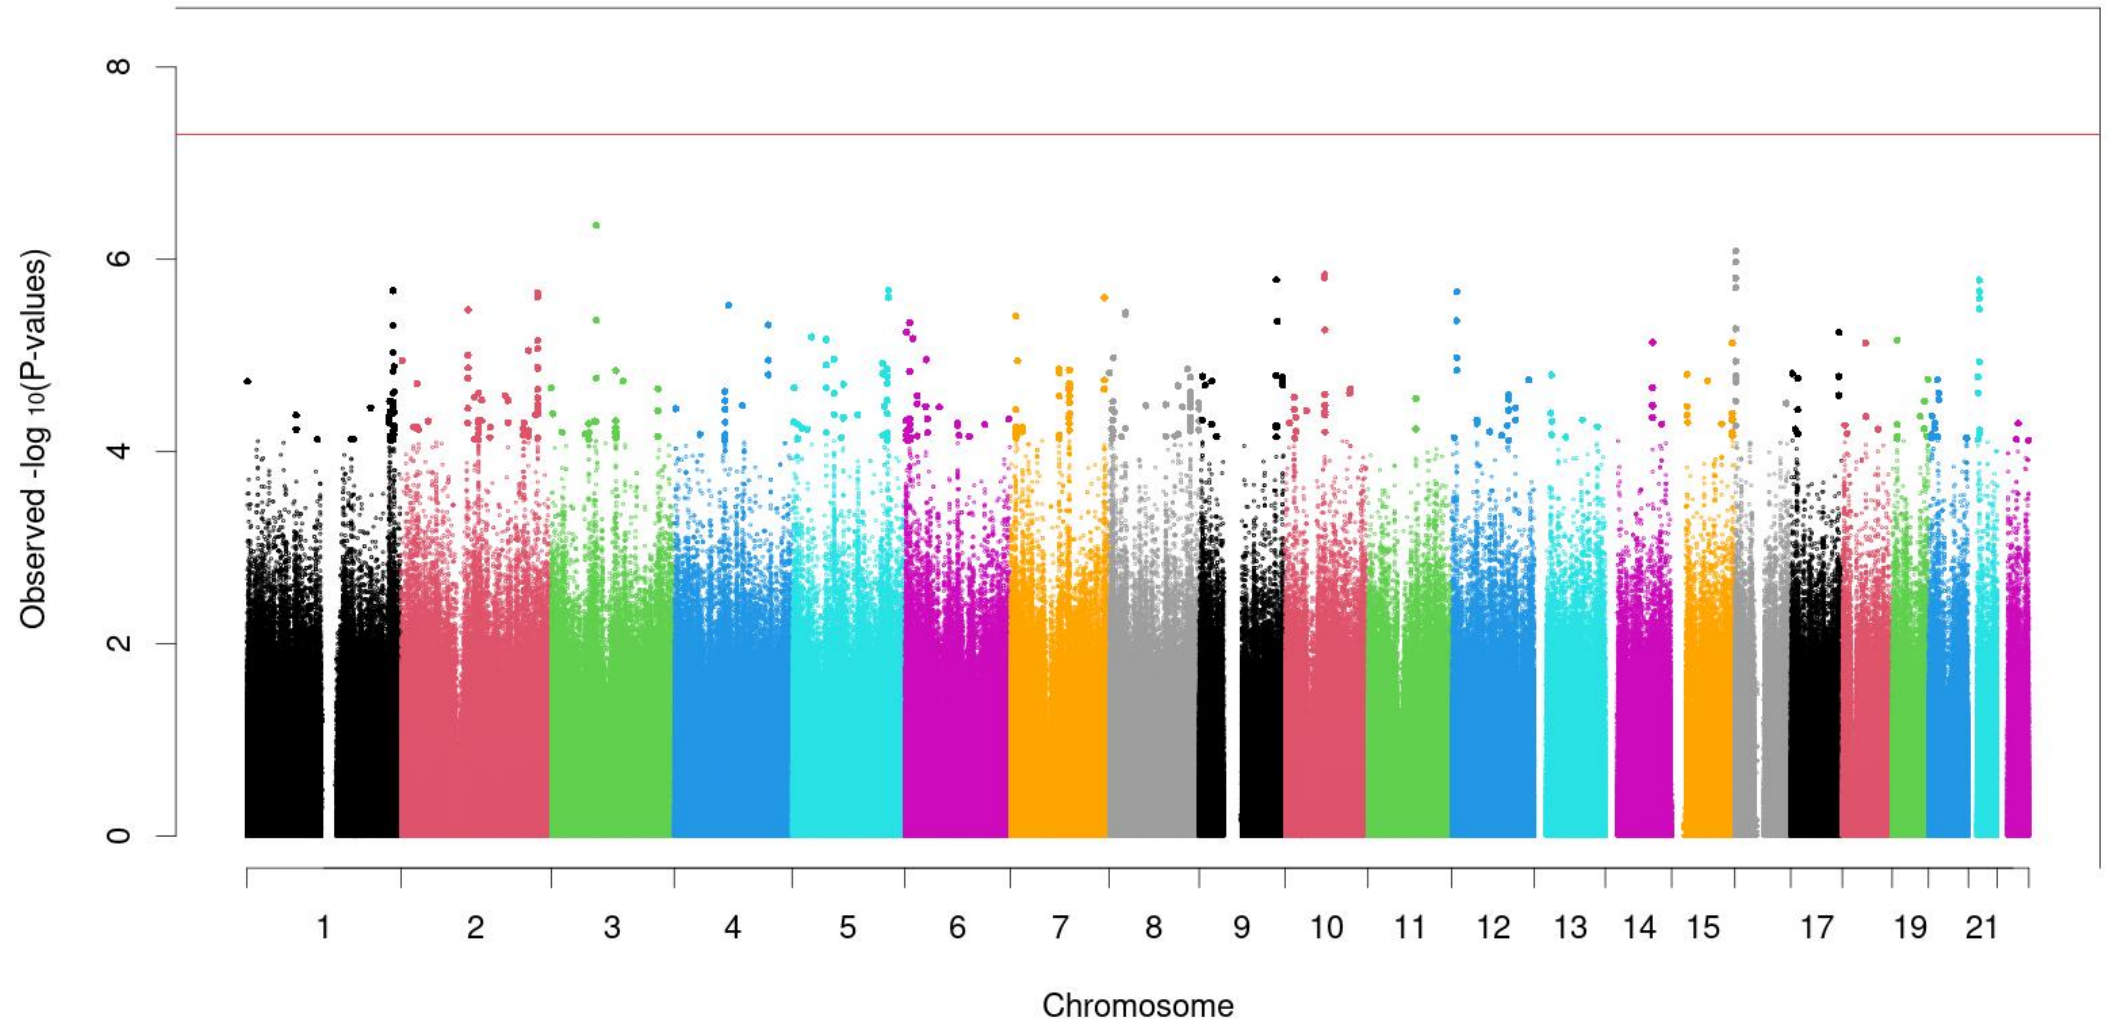

Manhattan plot for mz159.0515\_t42.1, allantoin

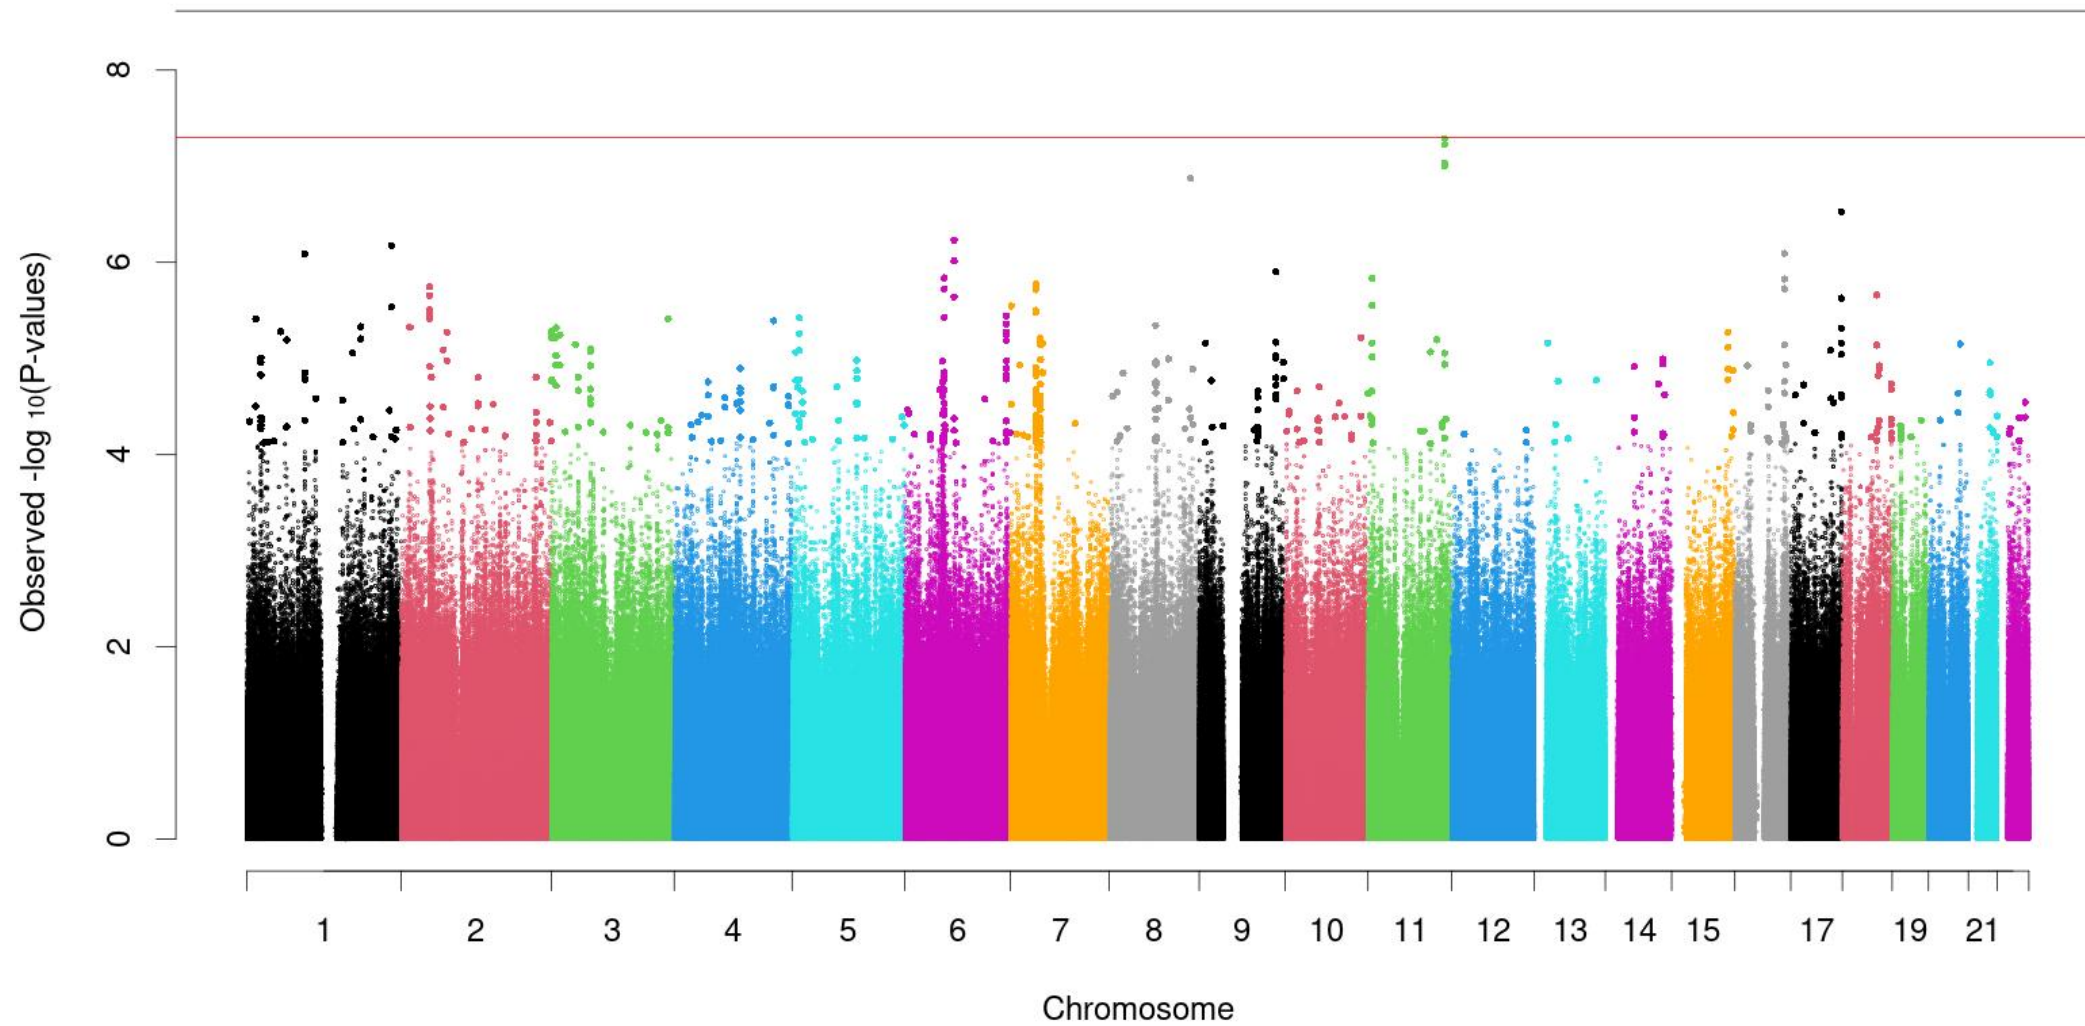



Manhattan plot for mz162.056\_t60.4, 3-methyl-2-oxindole

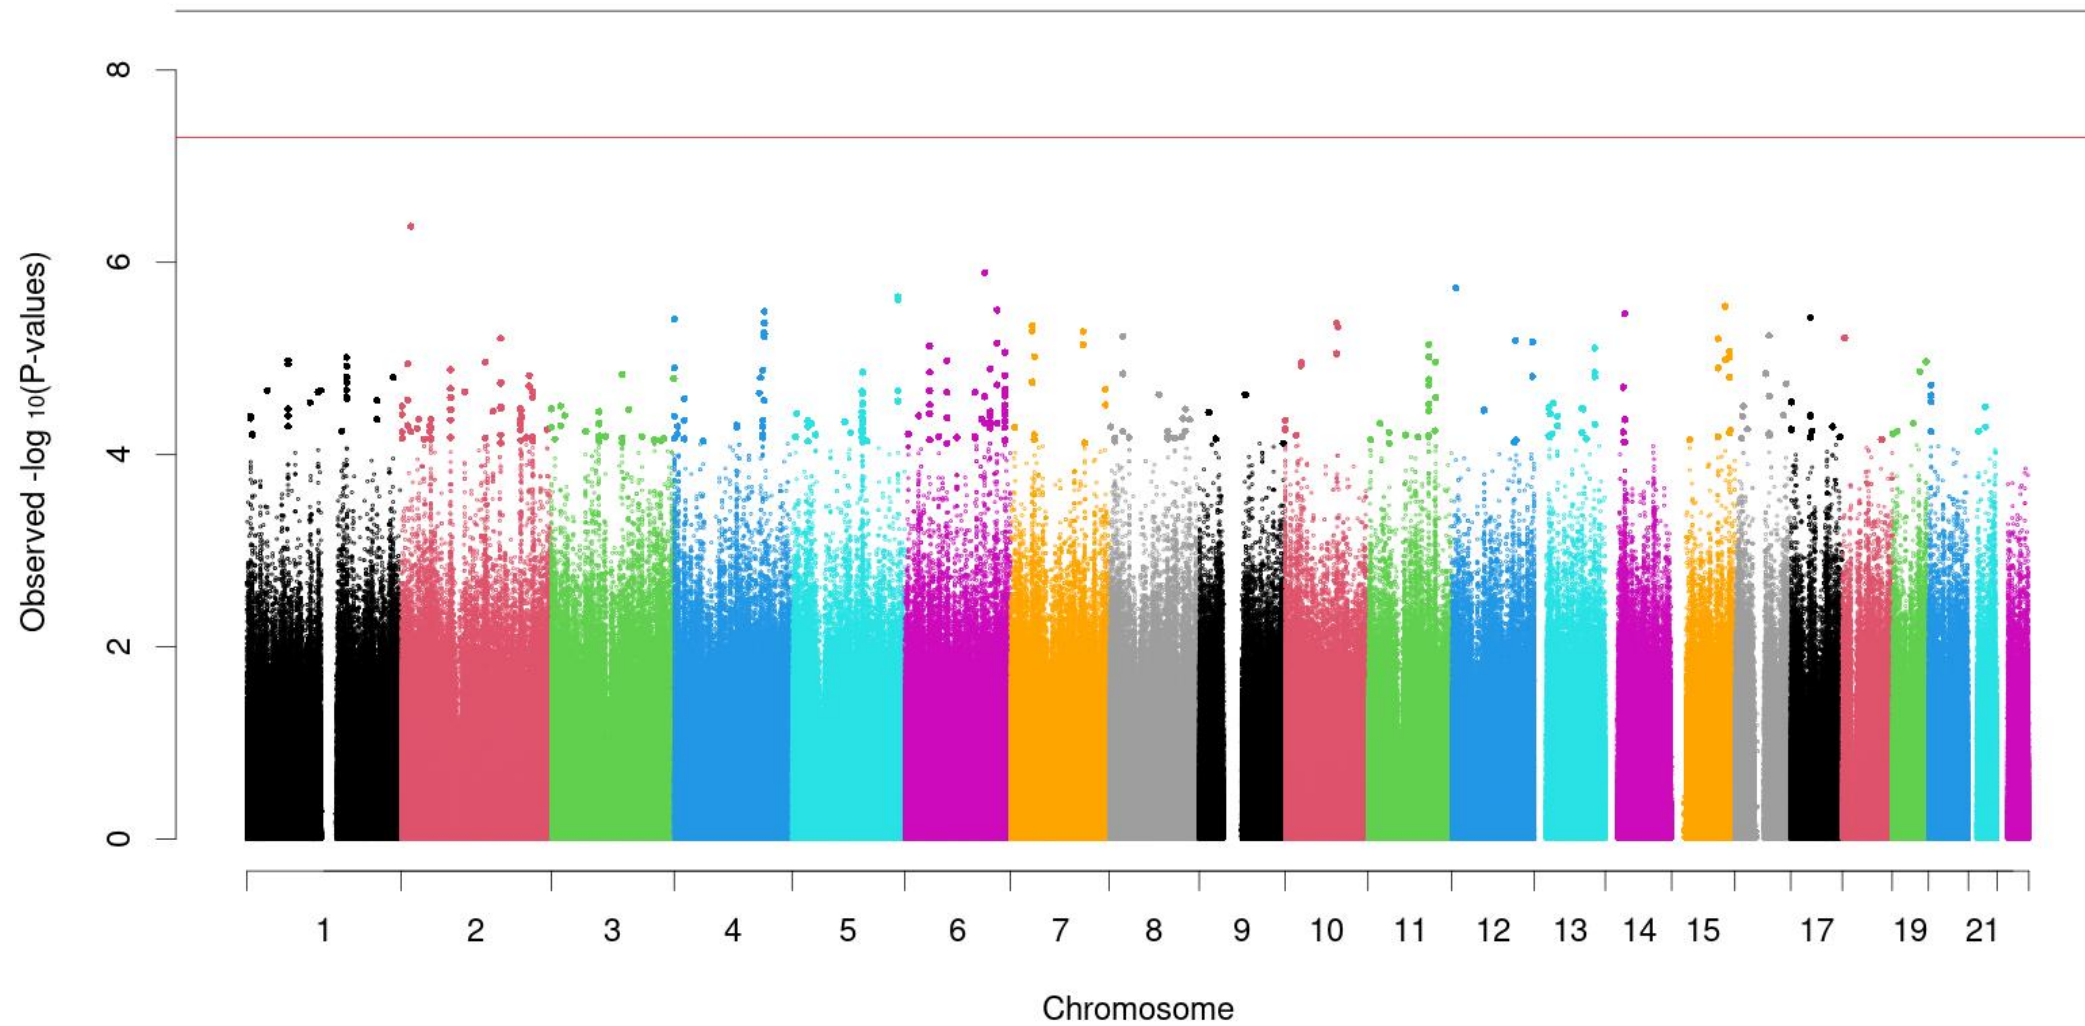

Manhattan plot for mz162.1124\_t80.7, carnitine

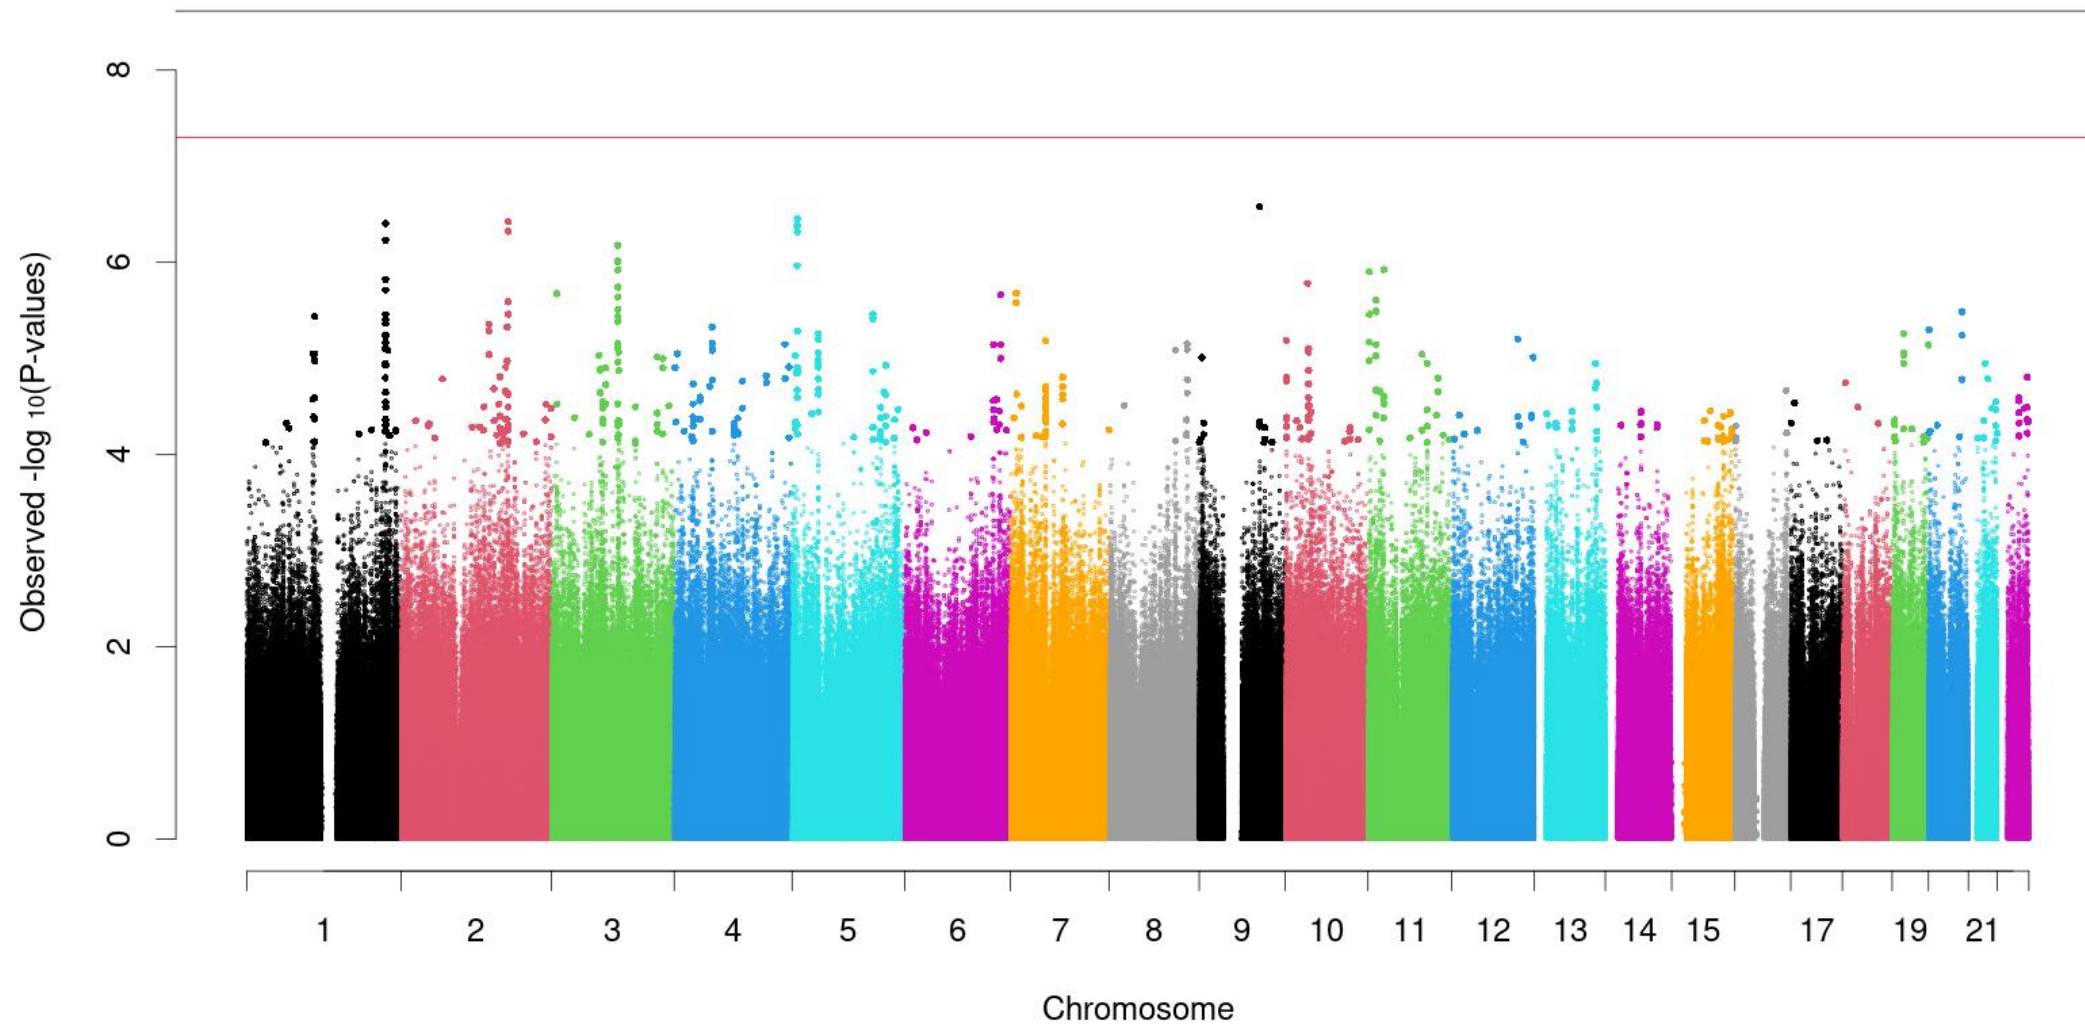

Manhattan plot for mz163.1229\_t40.3, (s)-nicotine

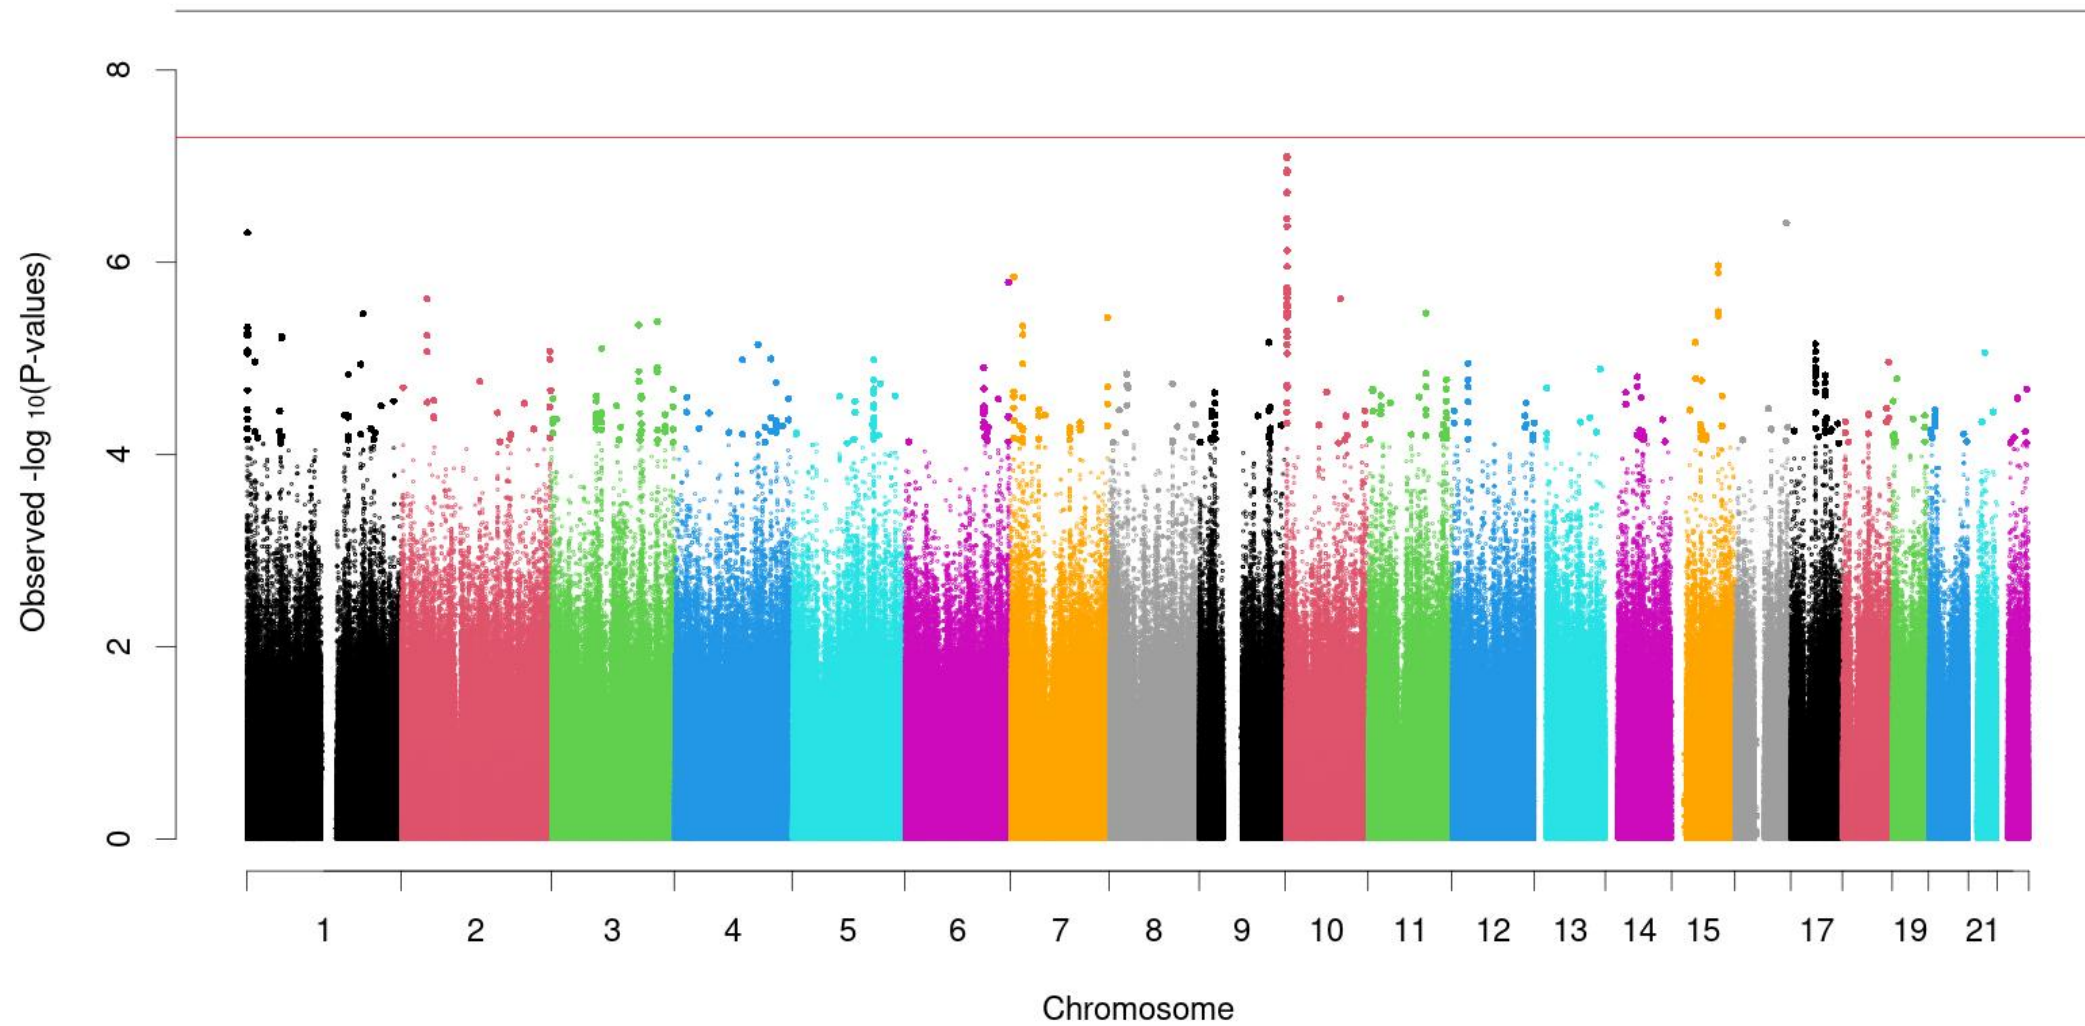



Manhattan plot for mz164.0377\_t43.9, n-acetyl-l-cysteine

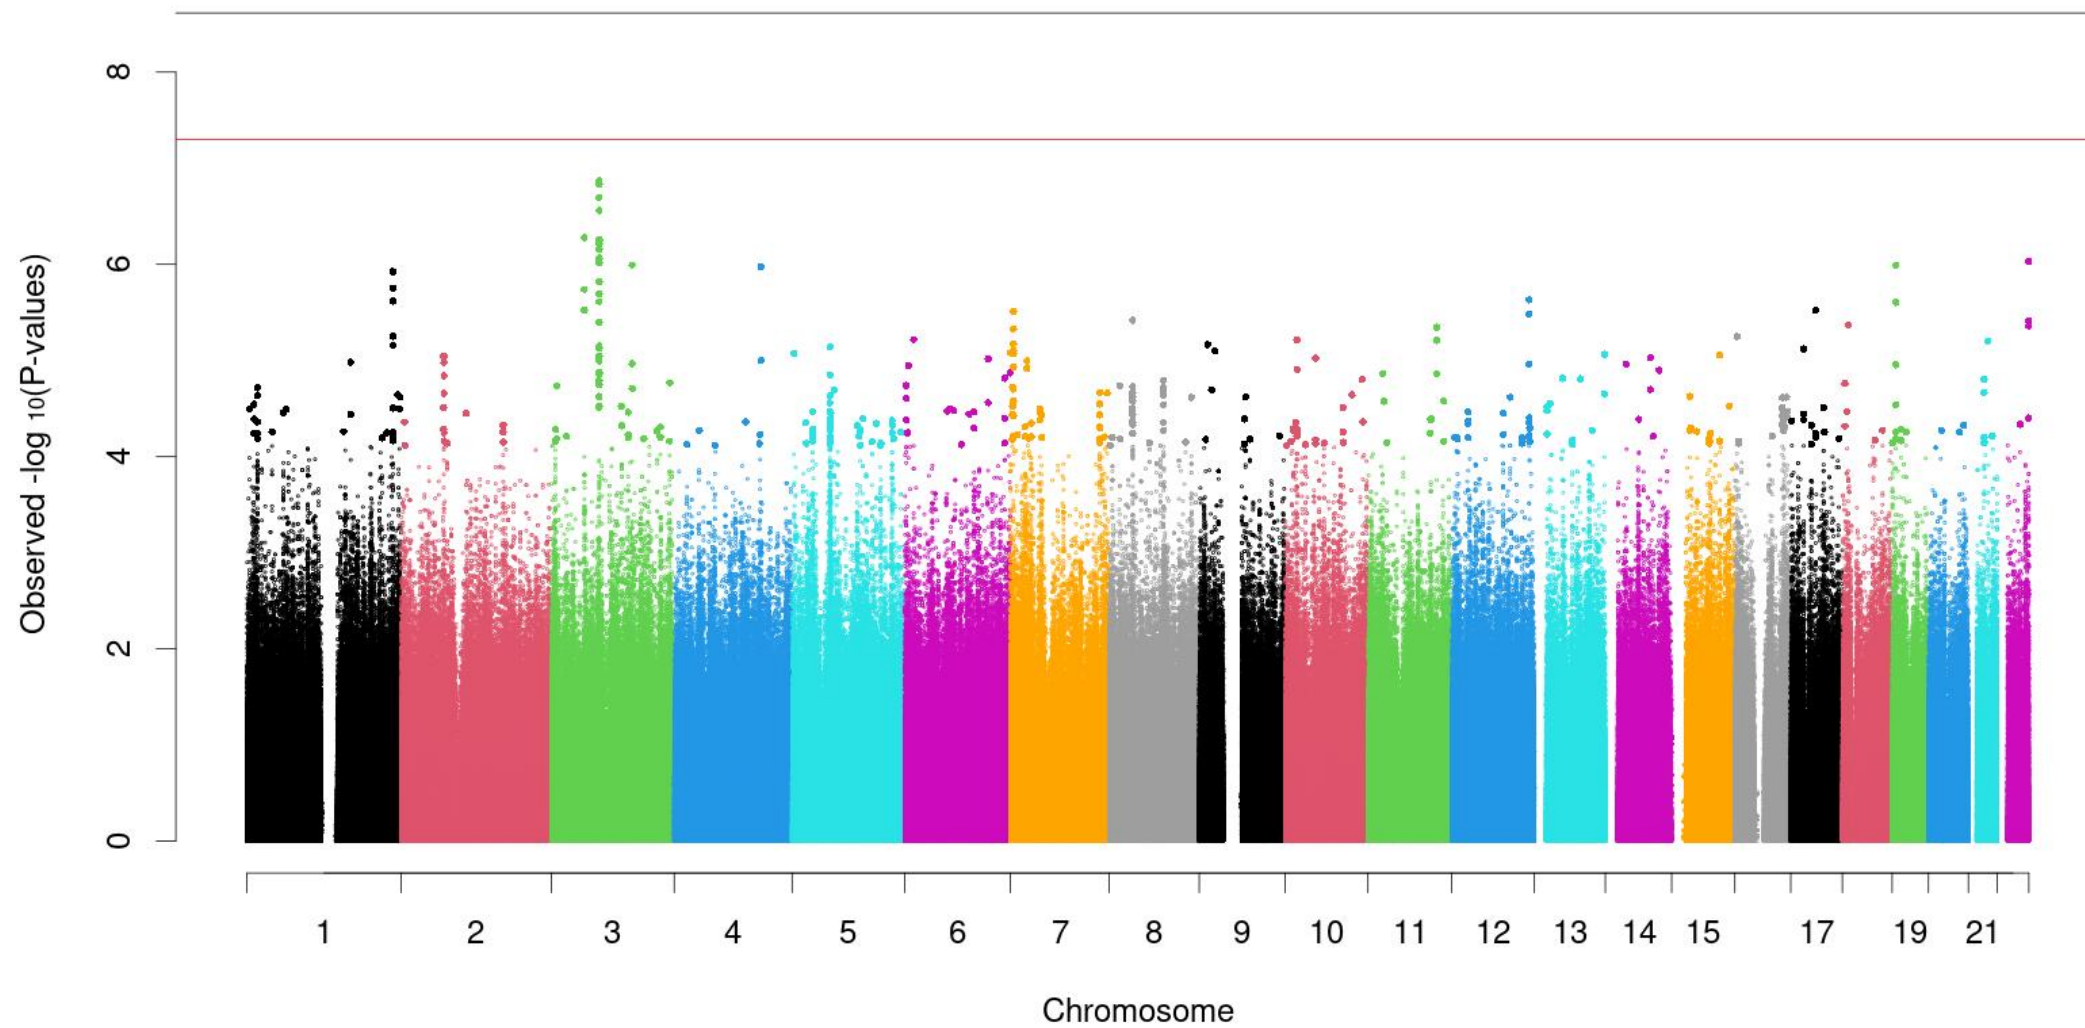

Manhattan plot for mz164.0717\_t22.7, phenylalanine

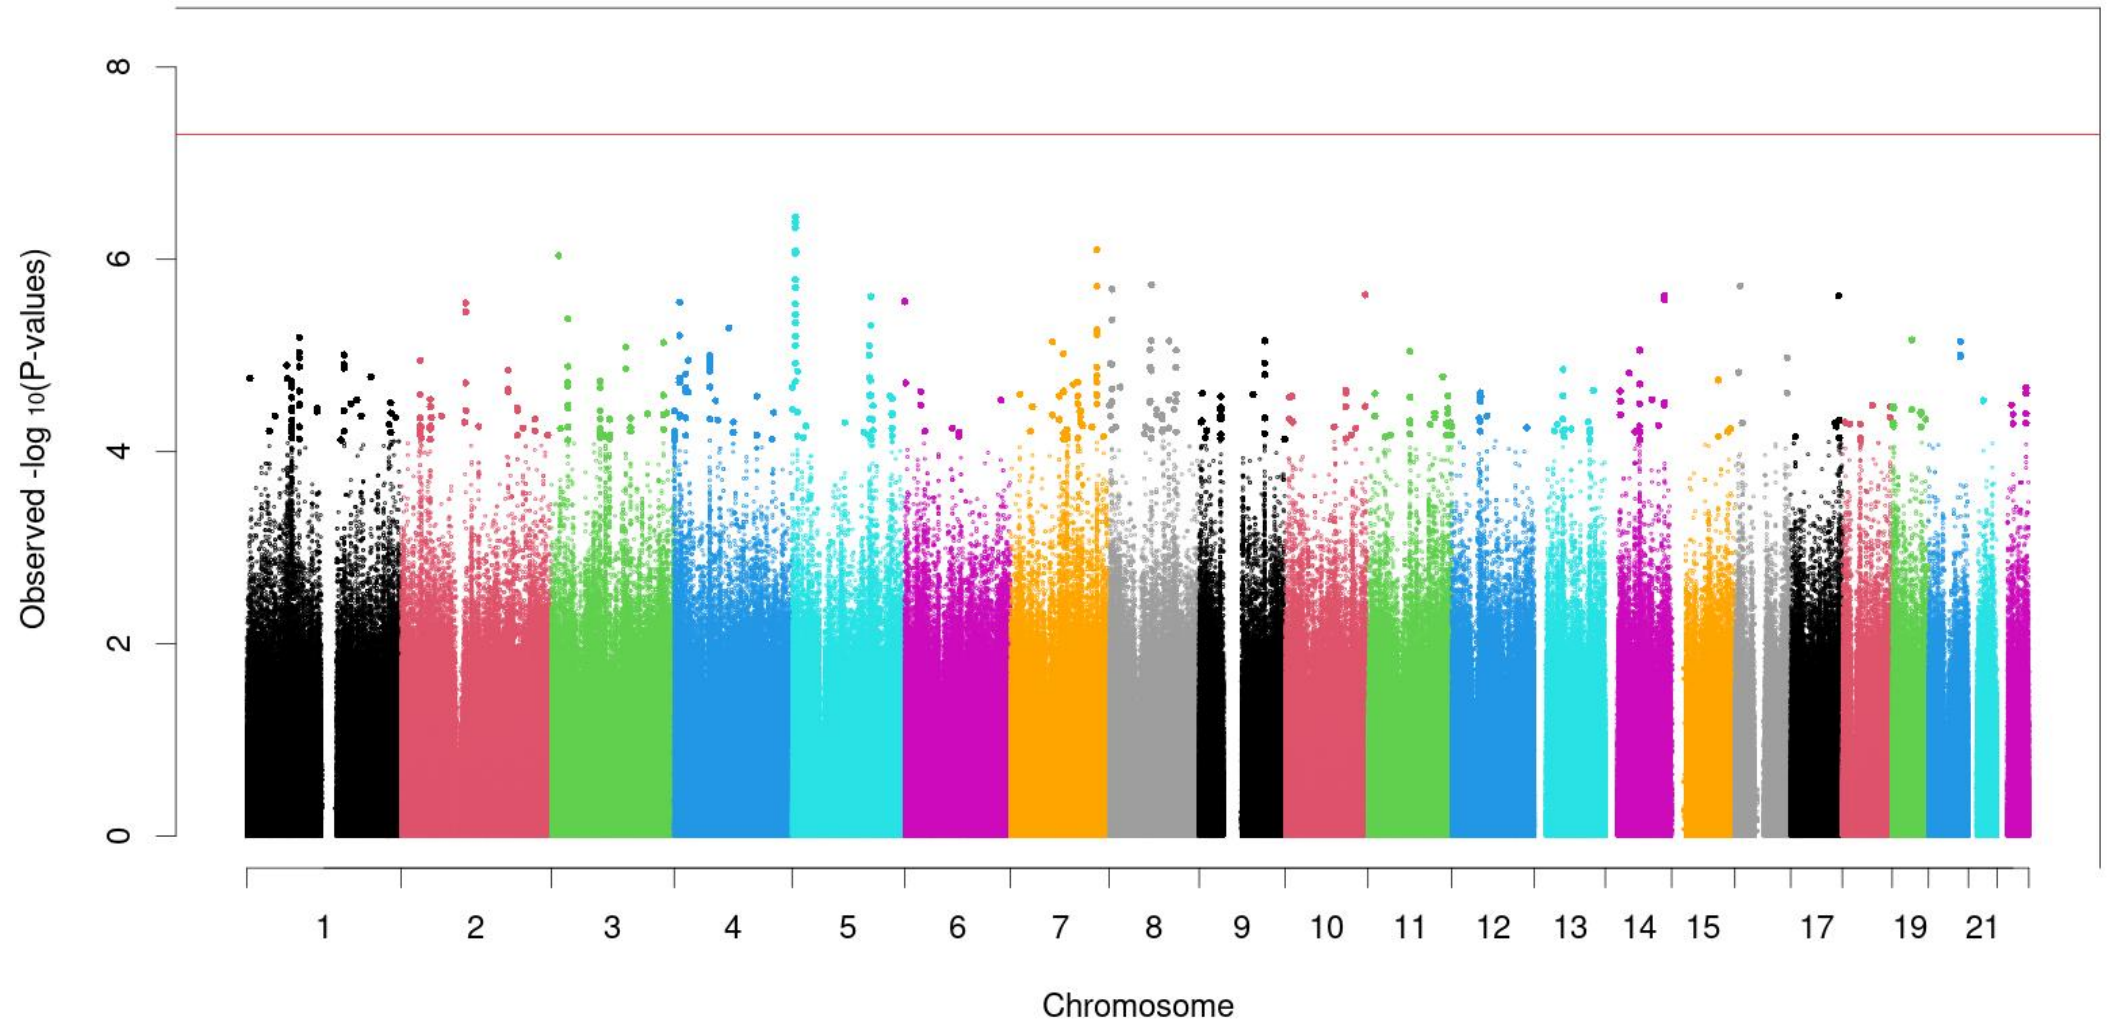

Manhattan plot for mz165.0557\_t49.5, 3-(2-hydroxyphenyl)propanoate

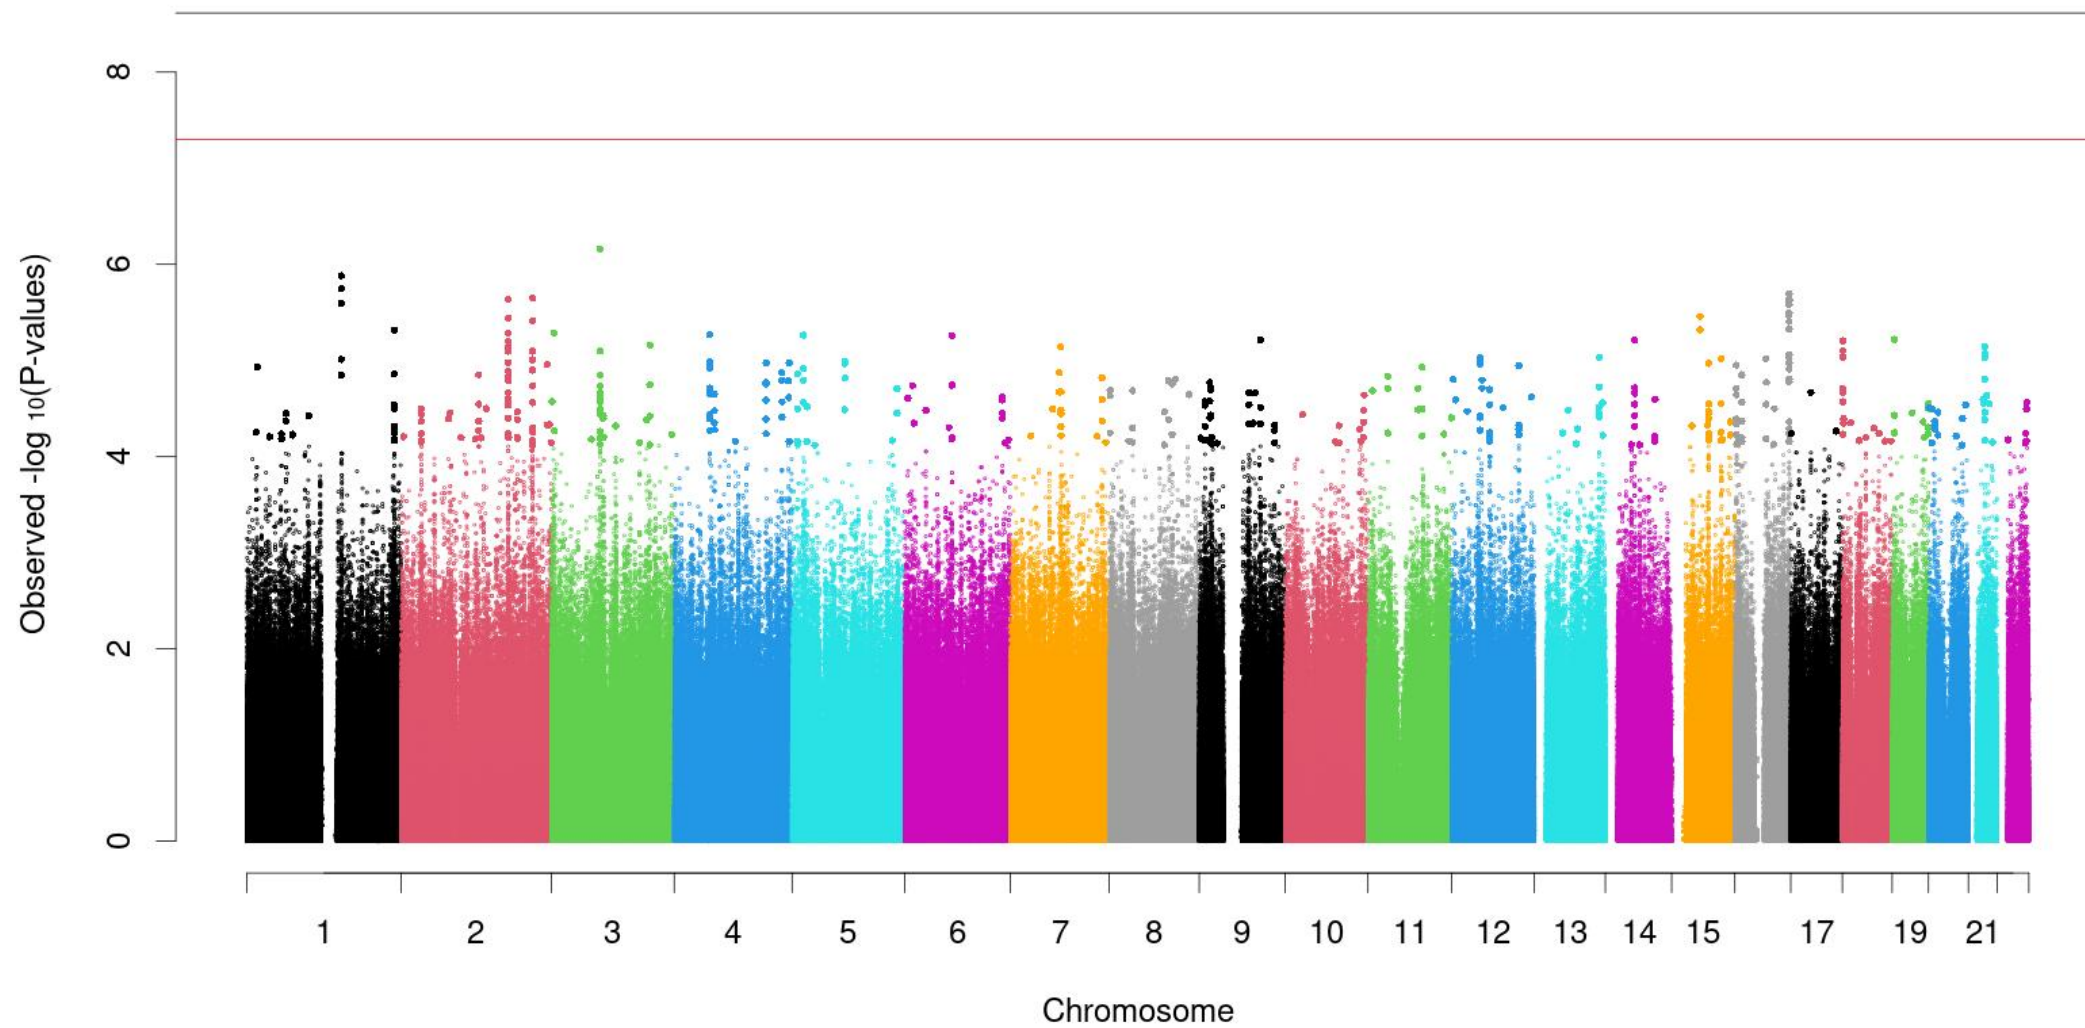



Manhattan plot for mz166.0862\_t46.5, phenylalanine

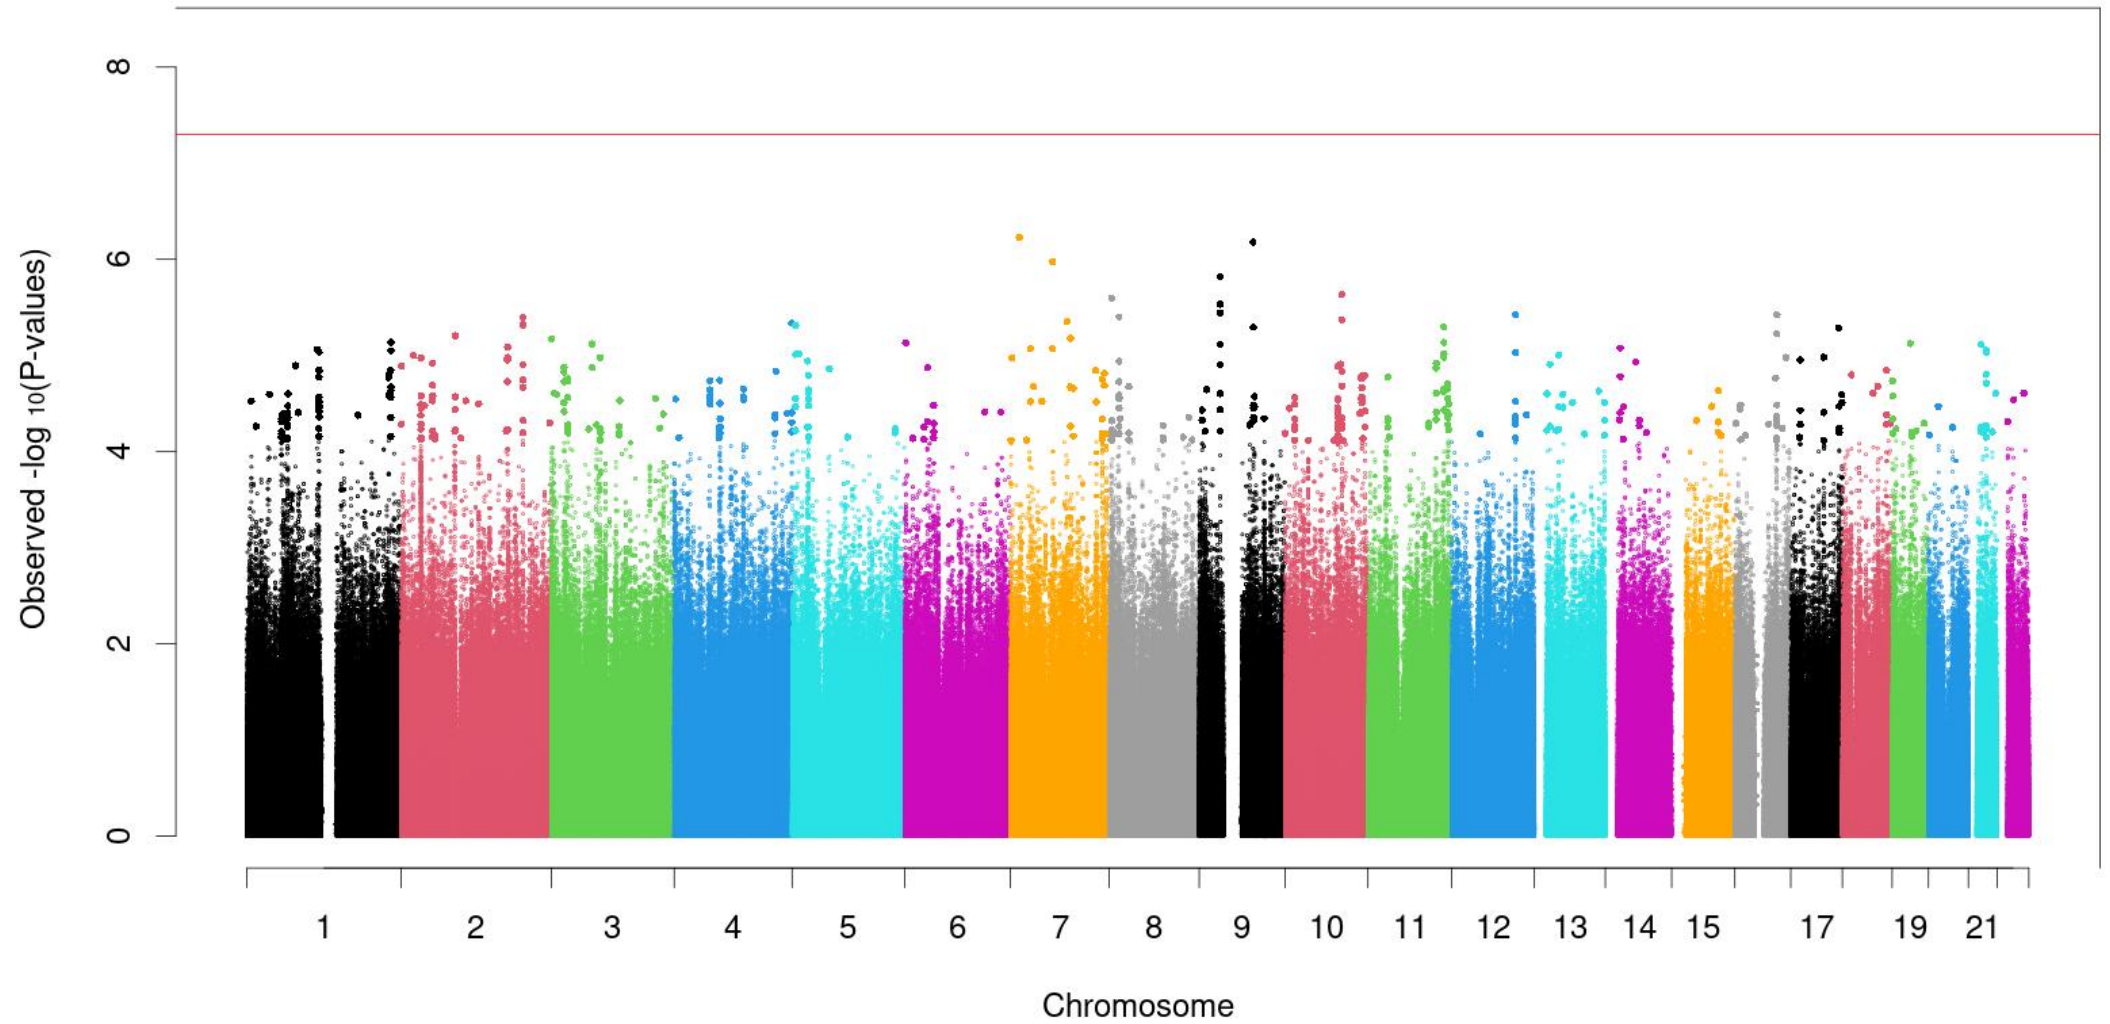

Manhattan plot for mz167.0211\_t23.9, urate

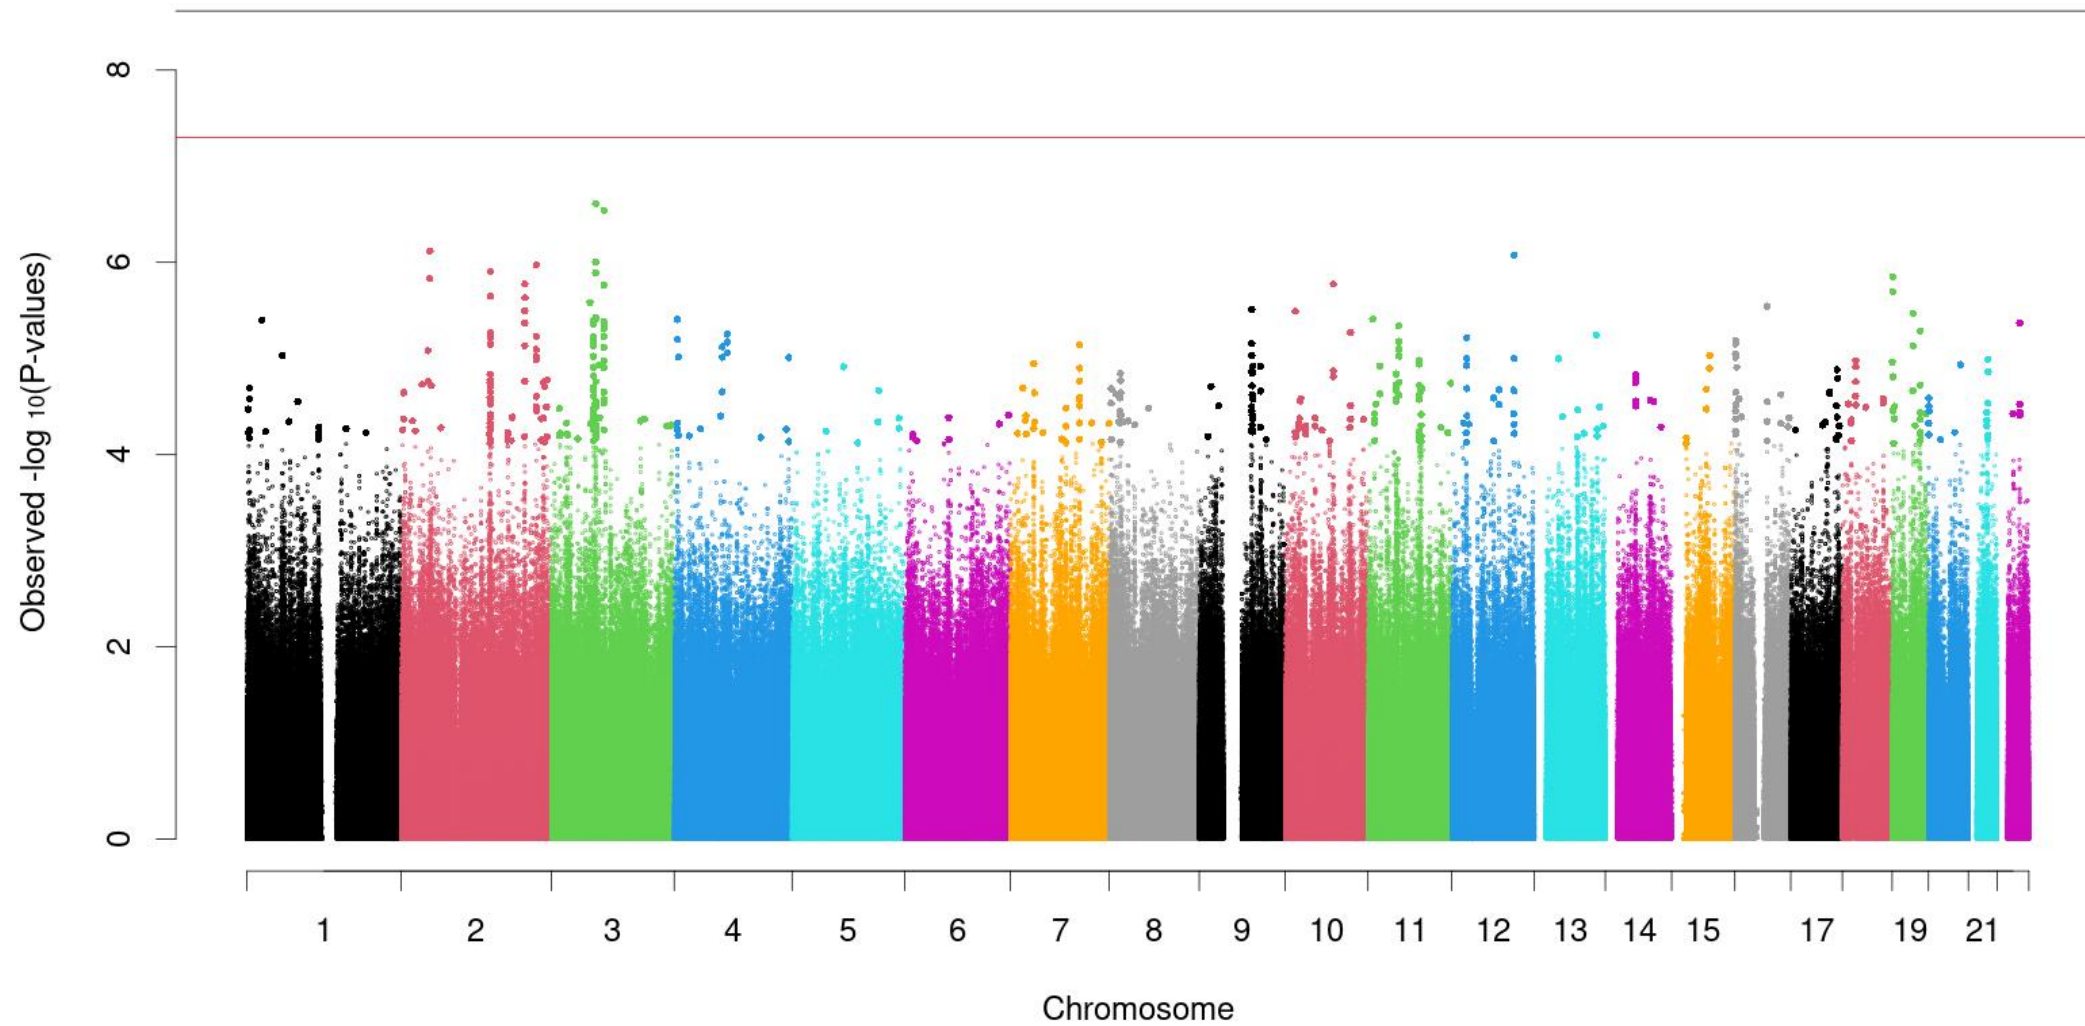

Manhattan plot for mz168.1019\_t36, 3-methoxytyramine

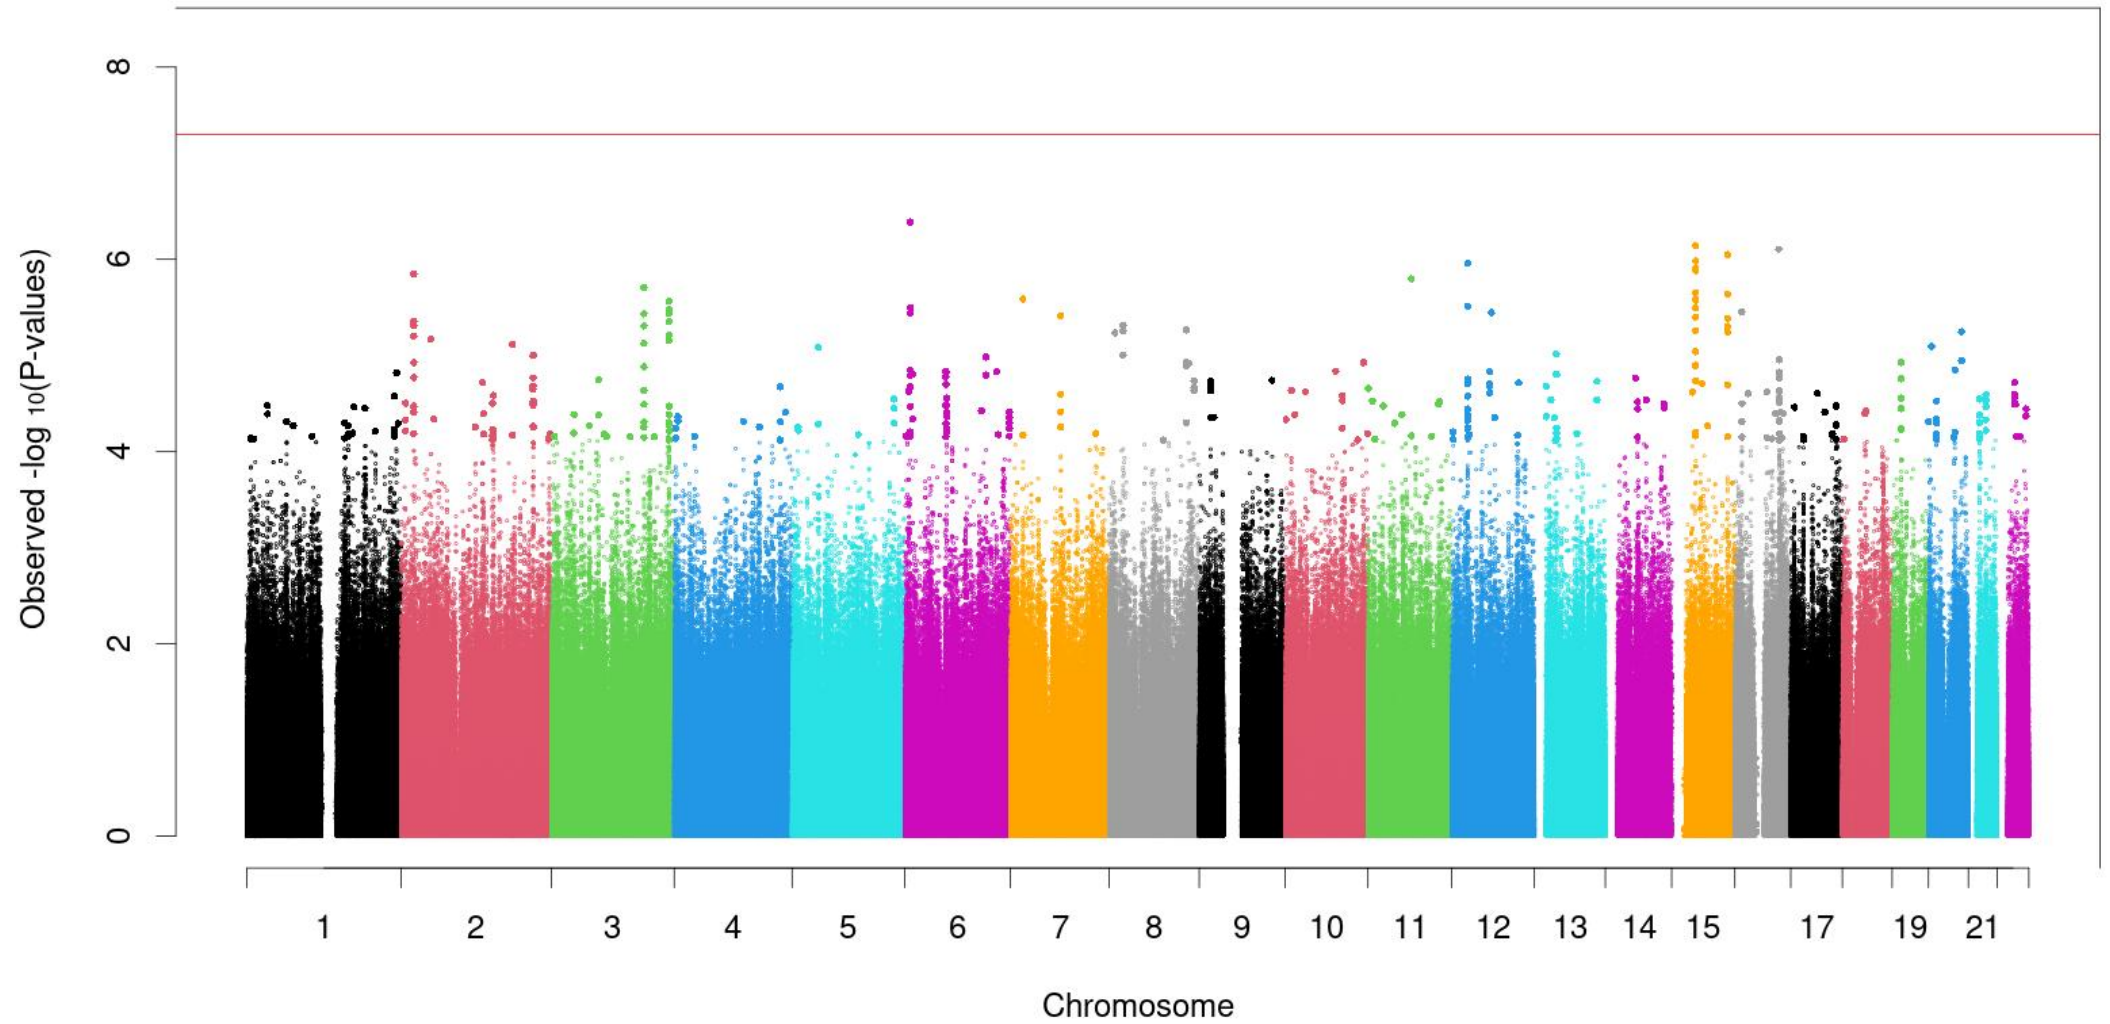



Manhattan plot for mz169.0357\_t49, urate

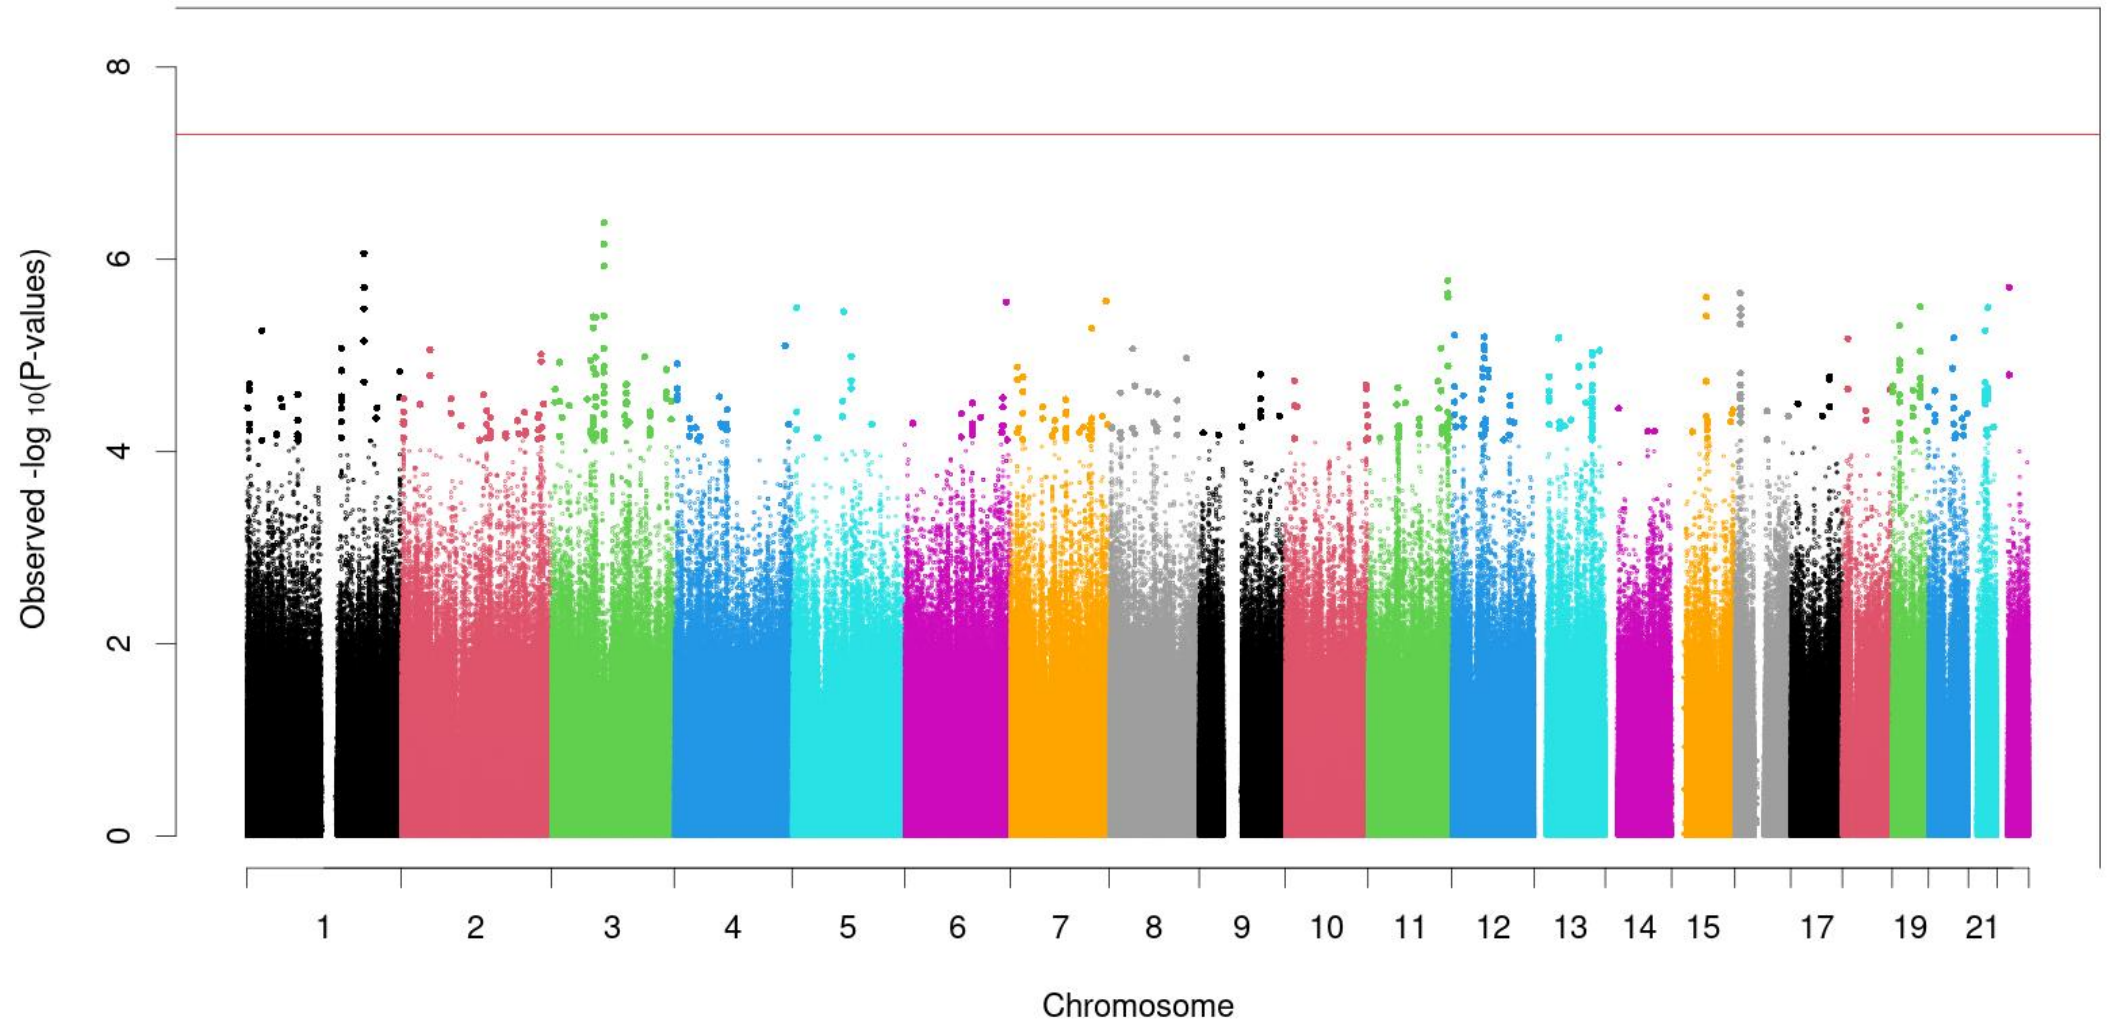

Manhattan plot for mz169.0971\_t67.2, pyridoxamine

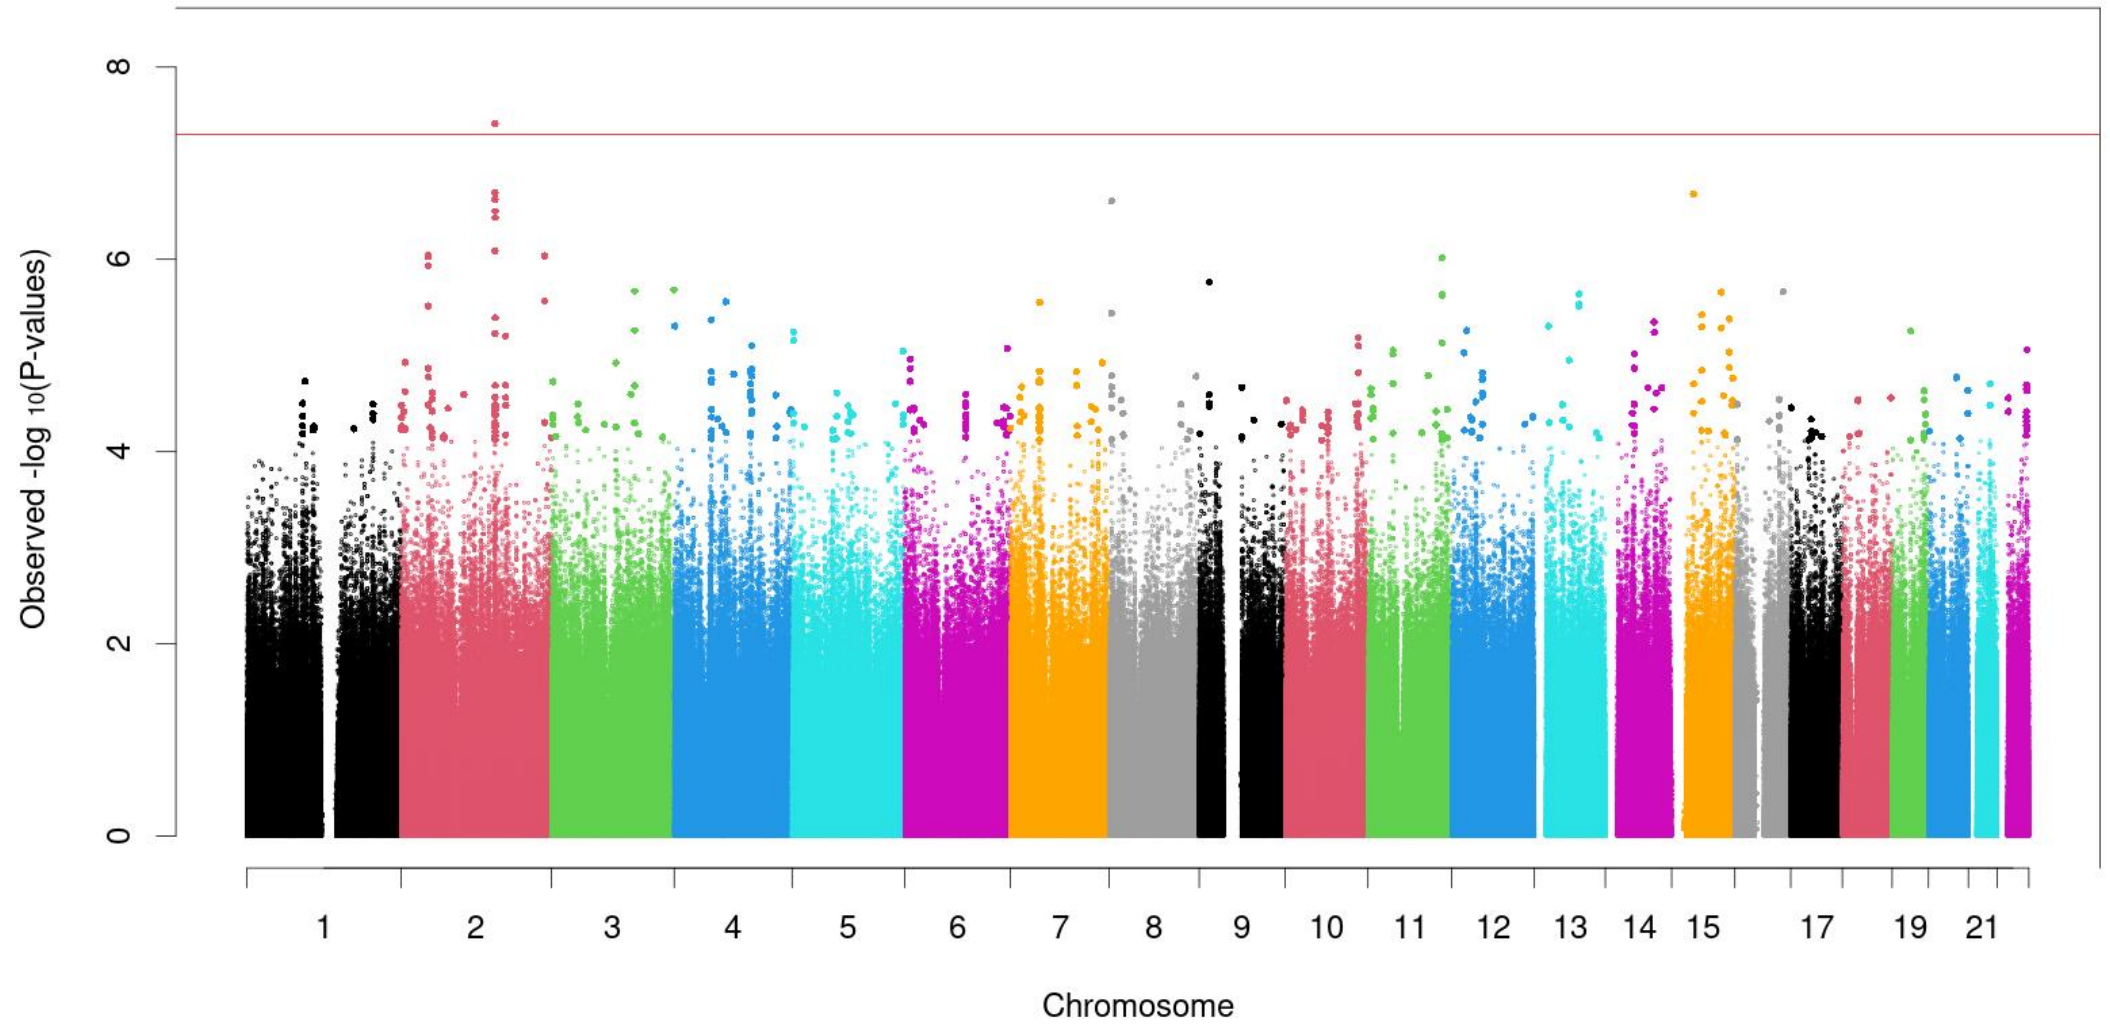

Manhattan plot for mz173.0091\_t25.6, trans-aconitate

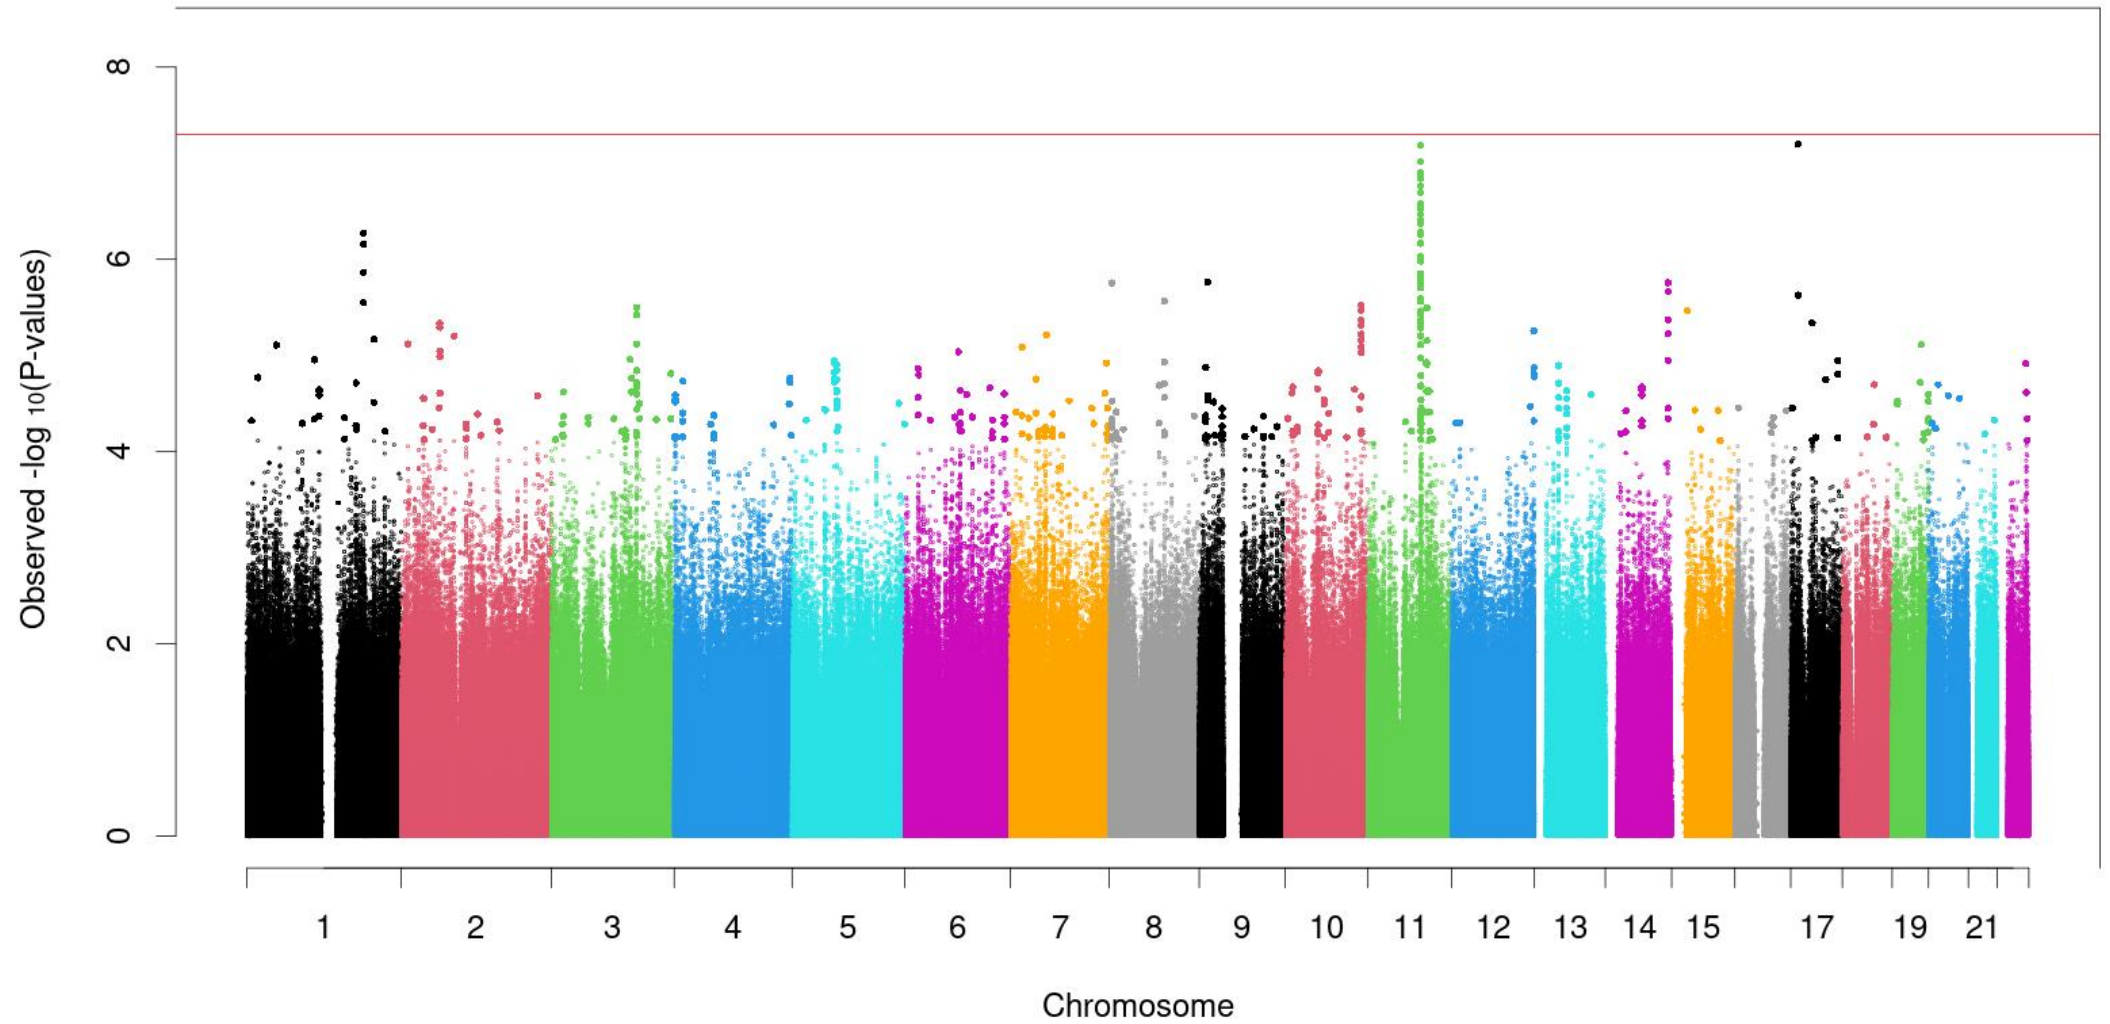



Manhattan plot for mz173.0456\_t23.2, shikimate

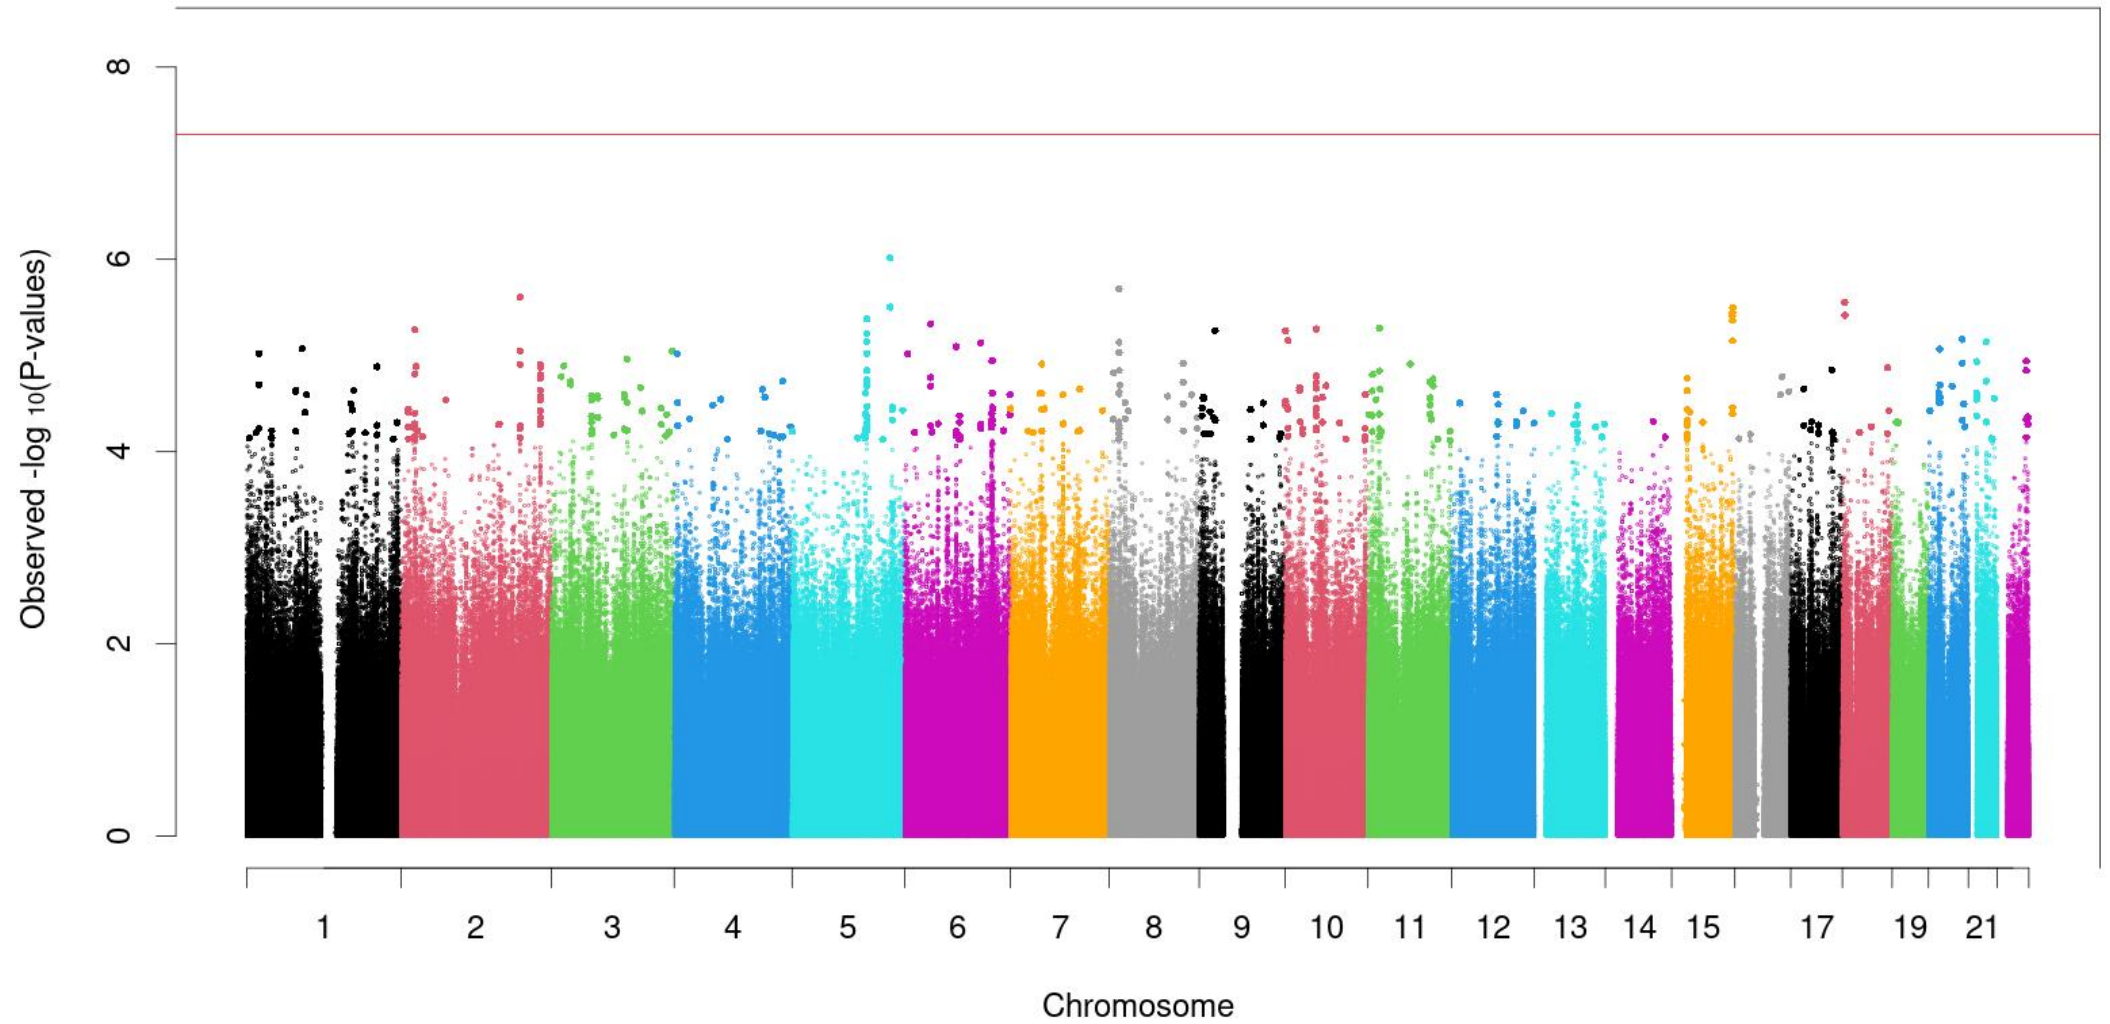

Manhattan plot for mz173.1044\_t19.5, arginine

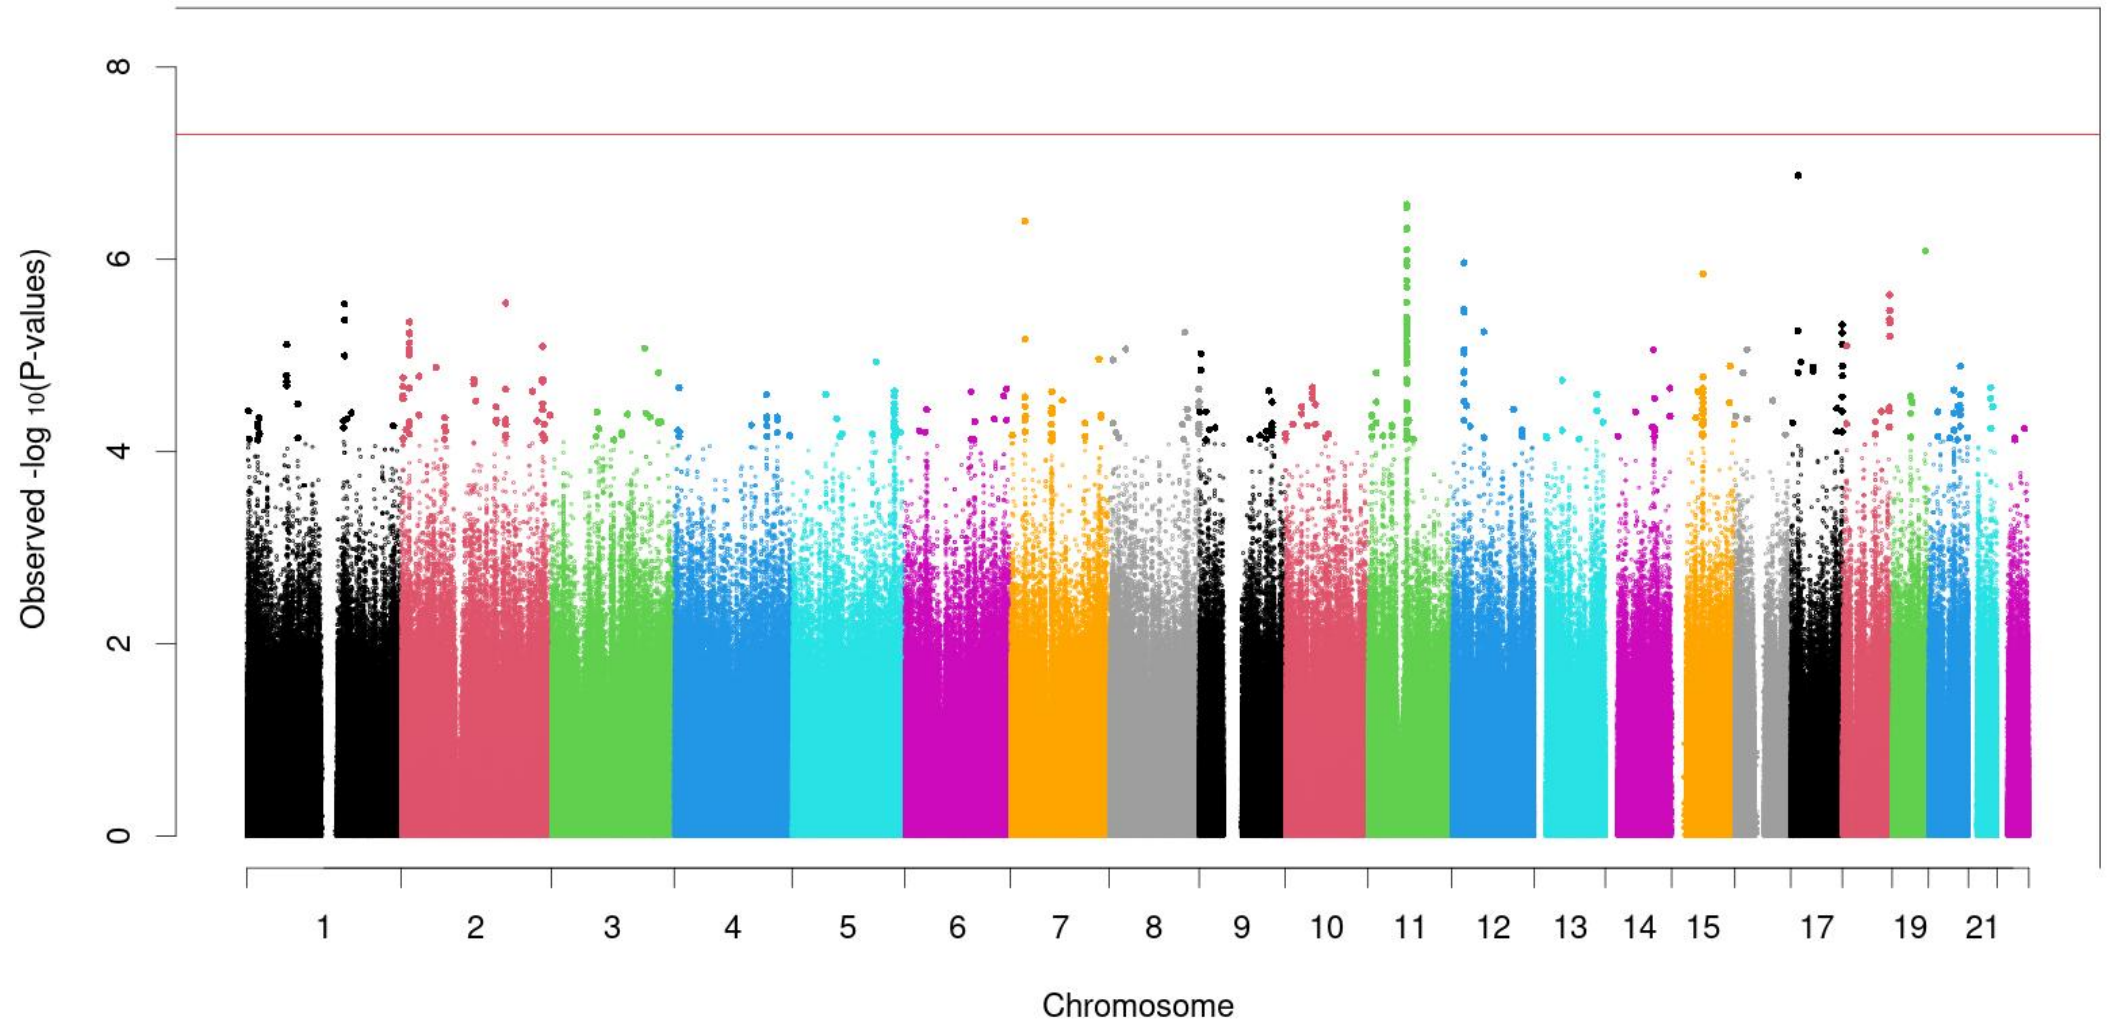

Manhattan plot for mz174.056\_t47.1, indole-3-acetate

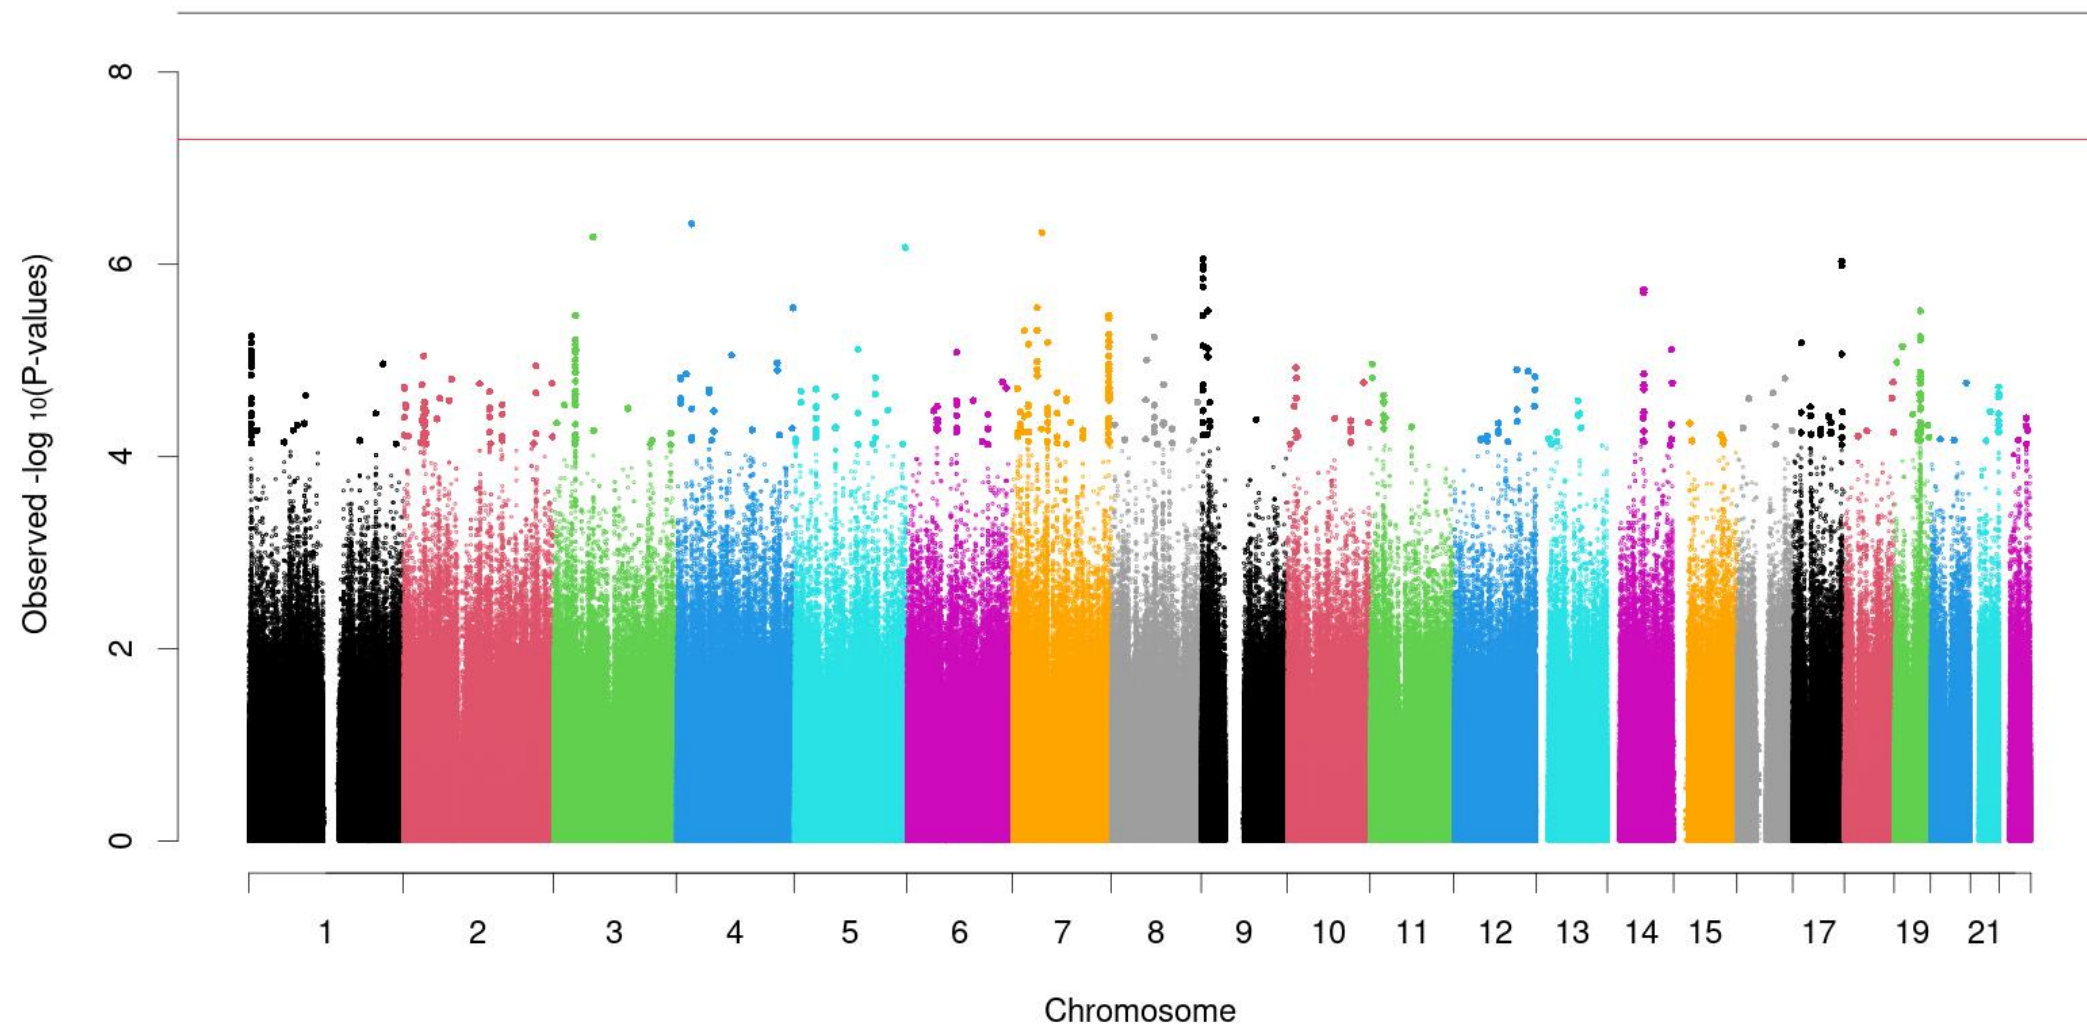



Manhattan plot for mz174.0884\_t21.1, citrulline

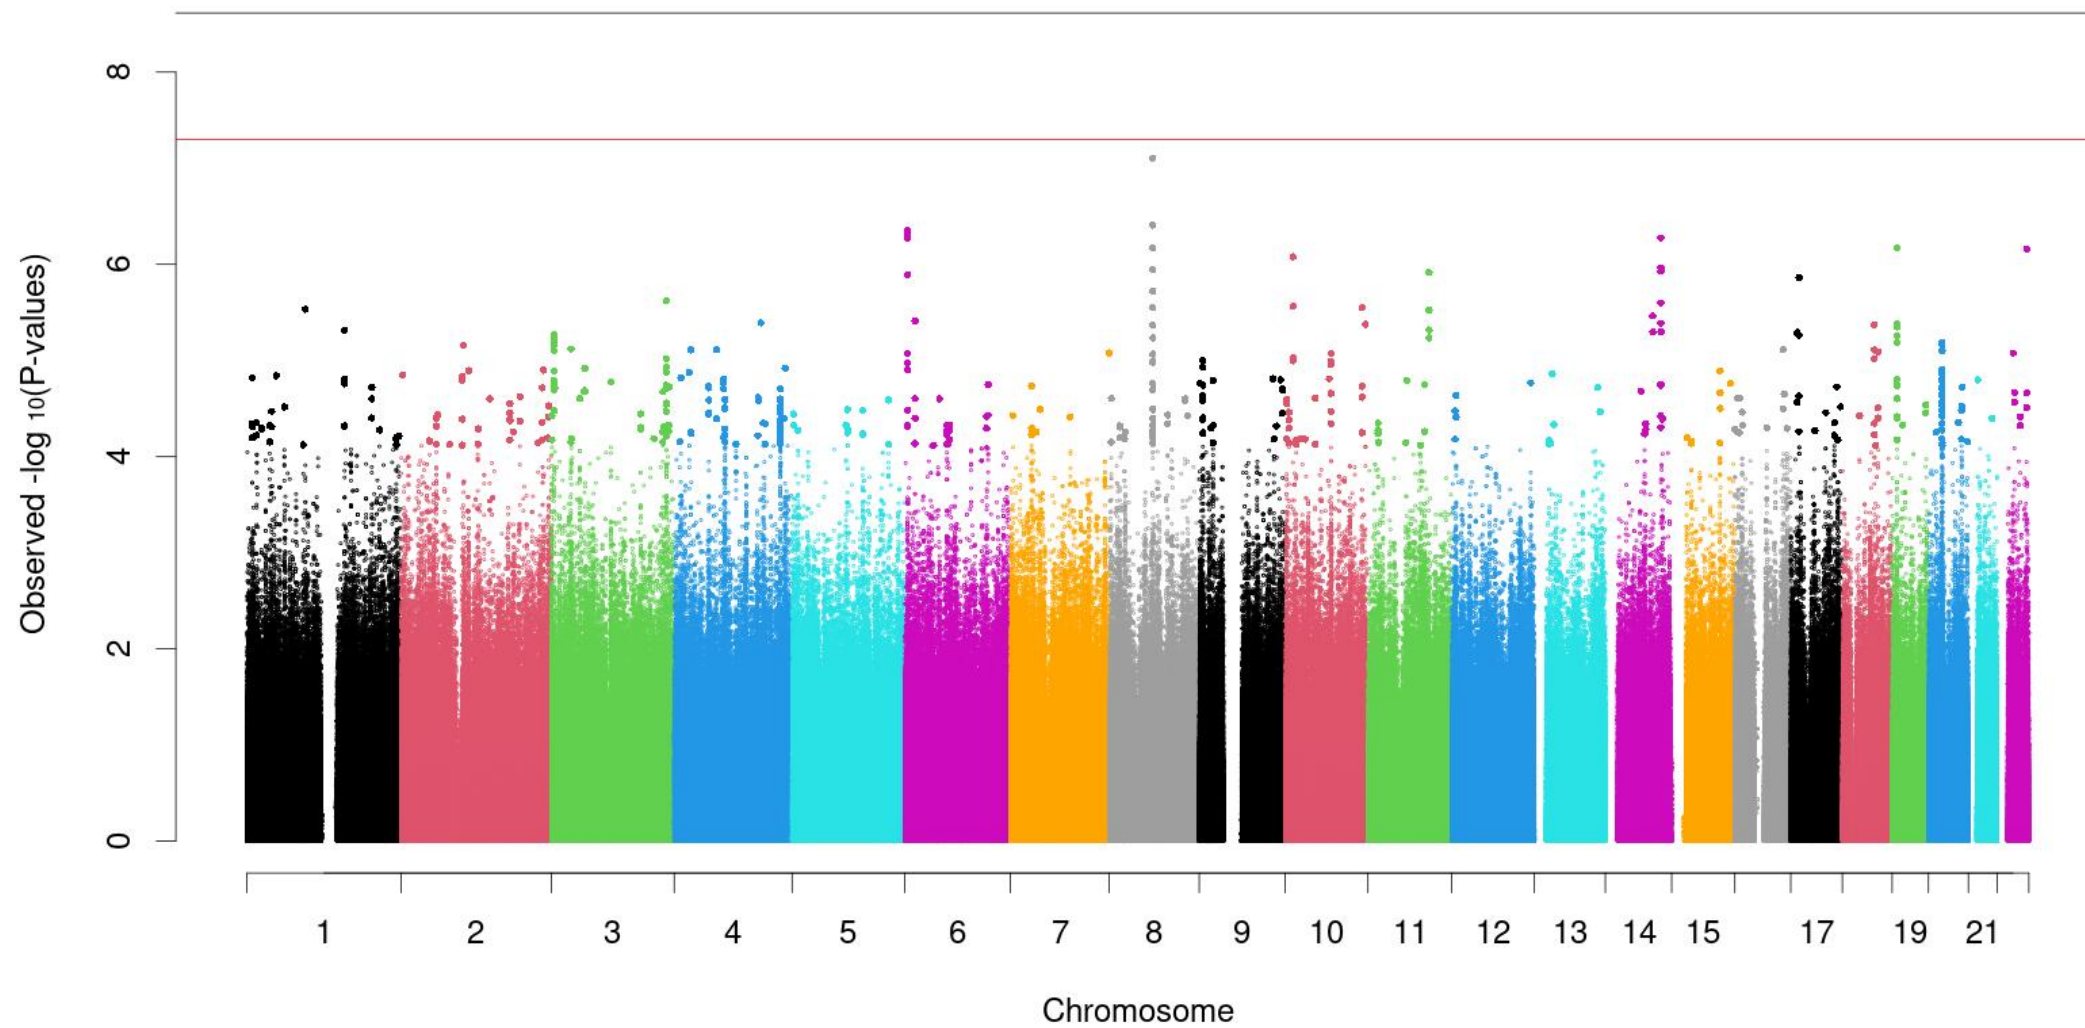

Manhattan plot for mz175.0866\_t42.7, indole-3-acetamide

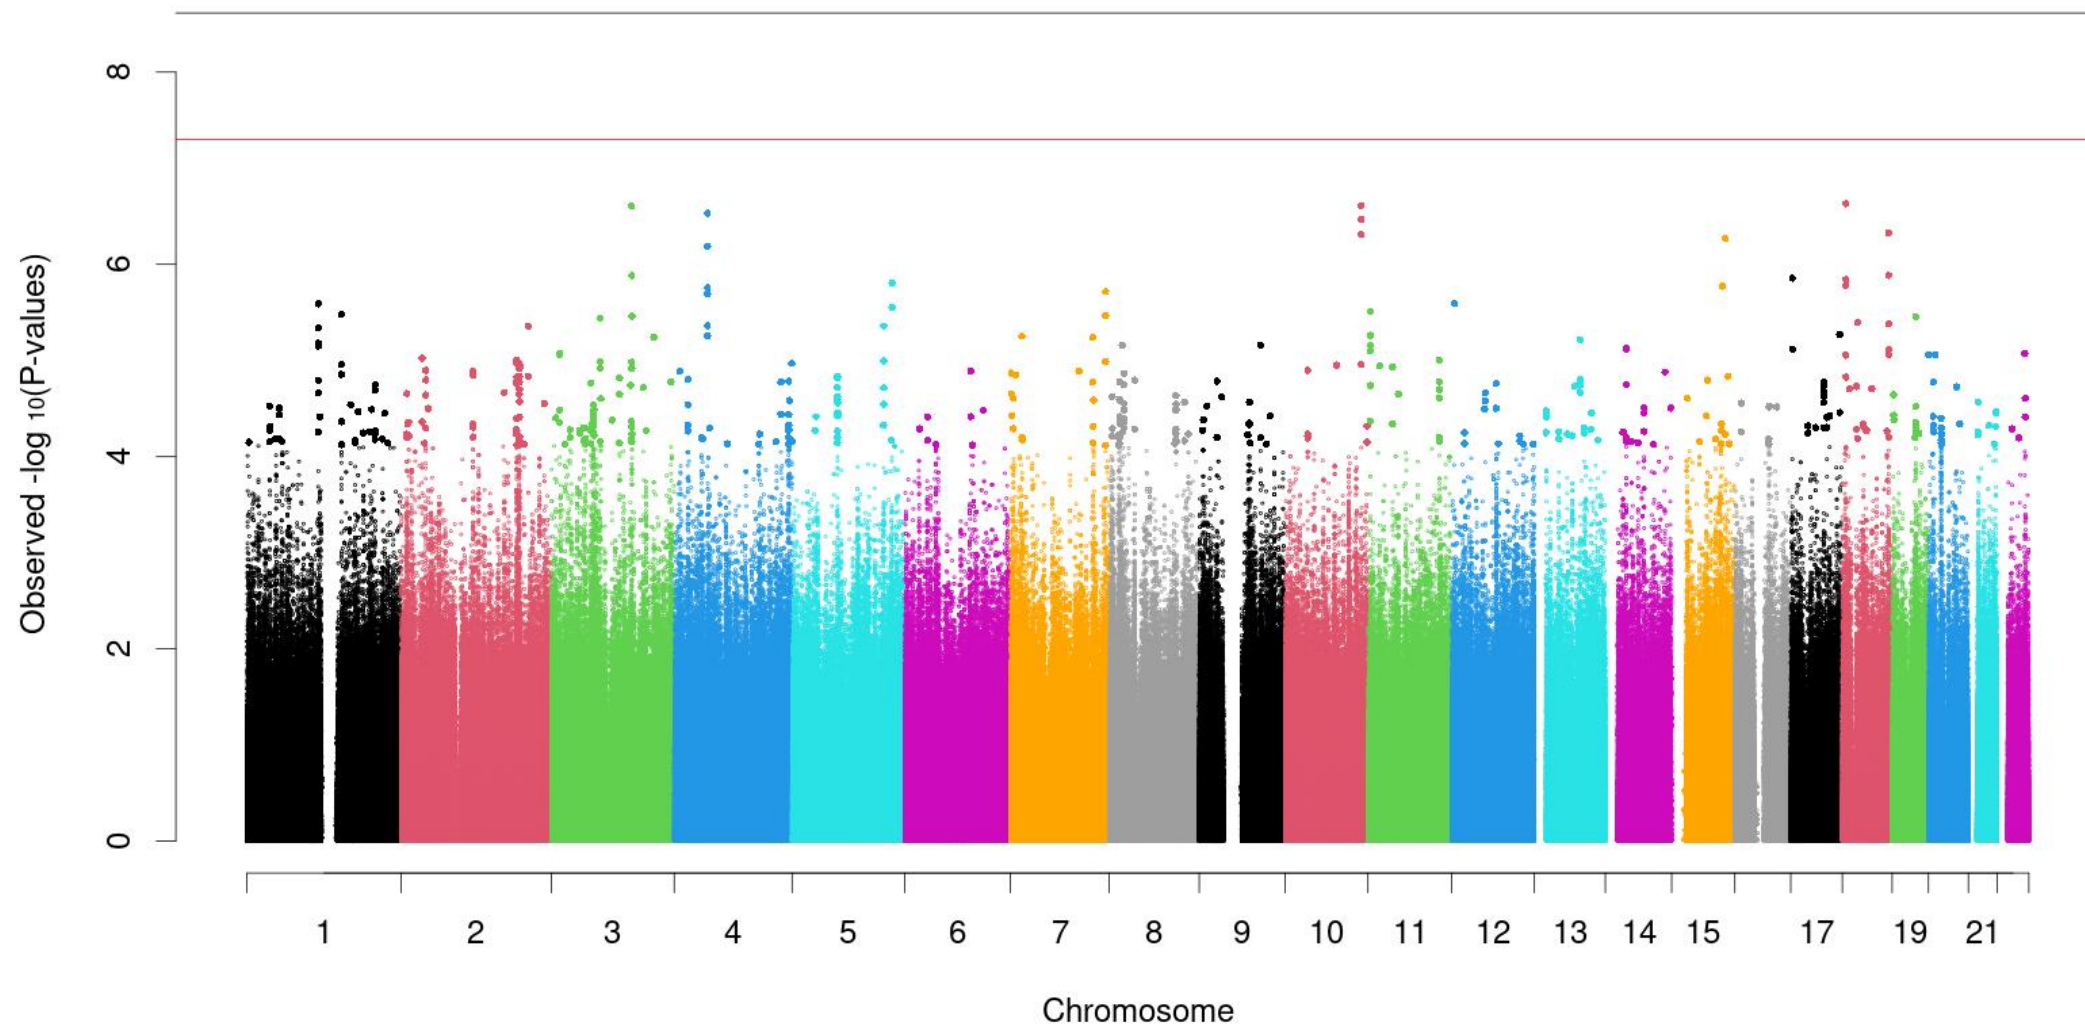

Manhattan plot for mz176.0388\_t26.6, formyl-L-methionyl peptide

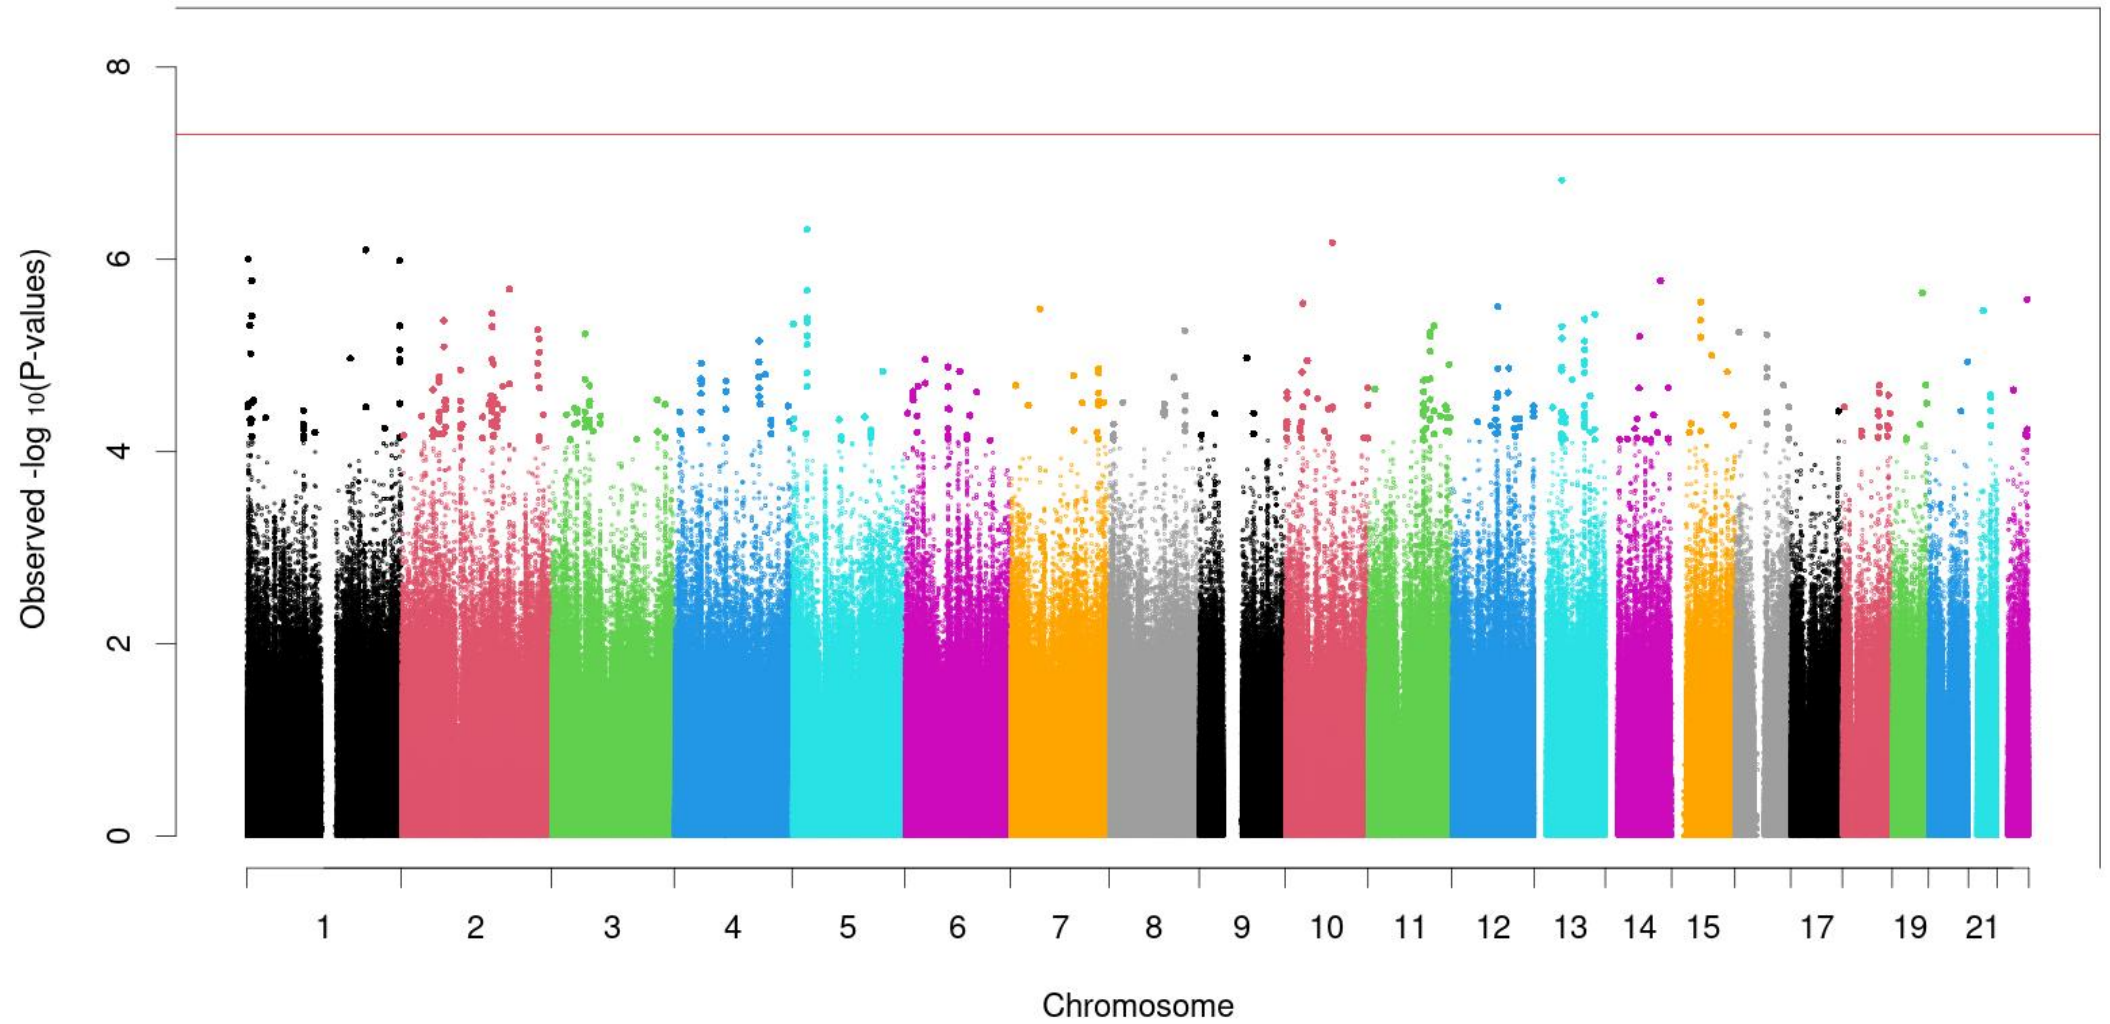



Manhattan plot for mz176.0663\_t49, n-amidino-l-aspartate

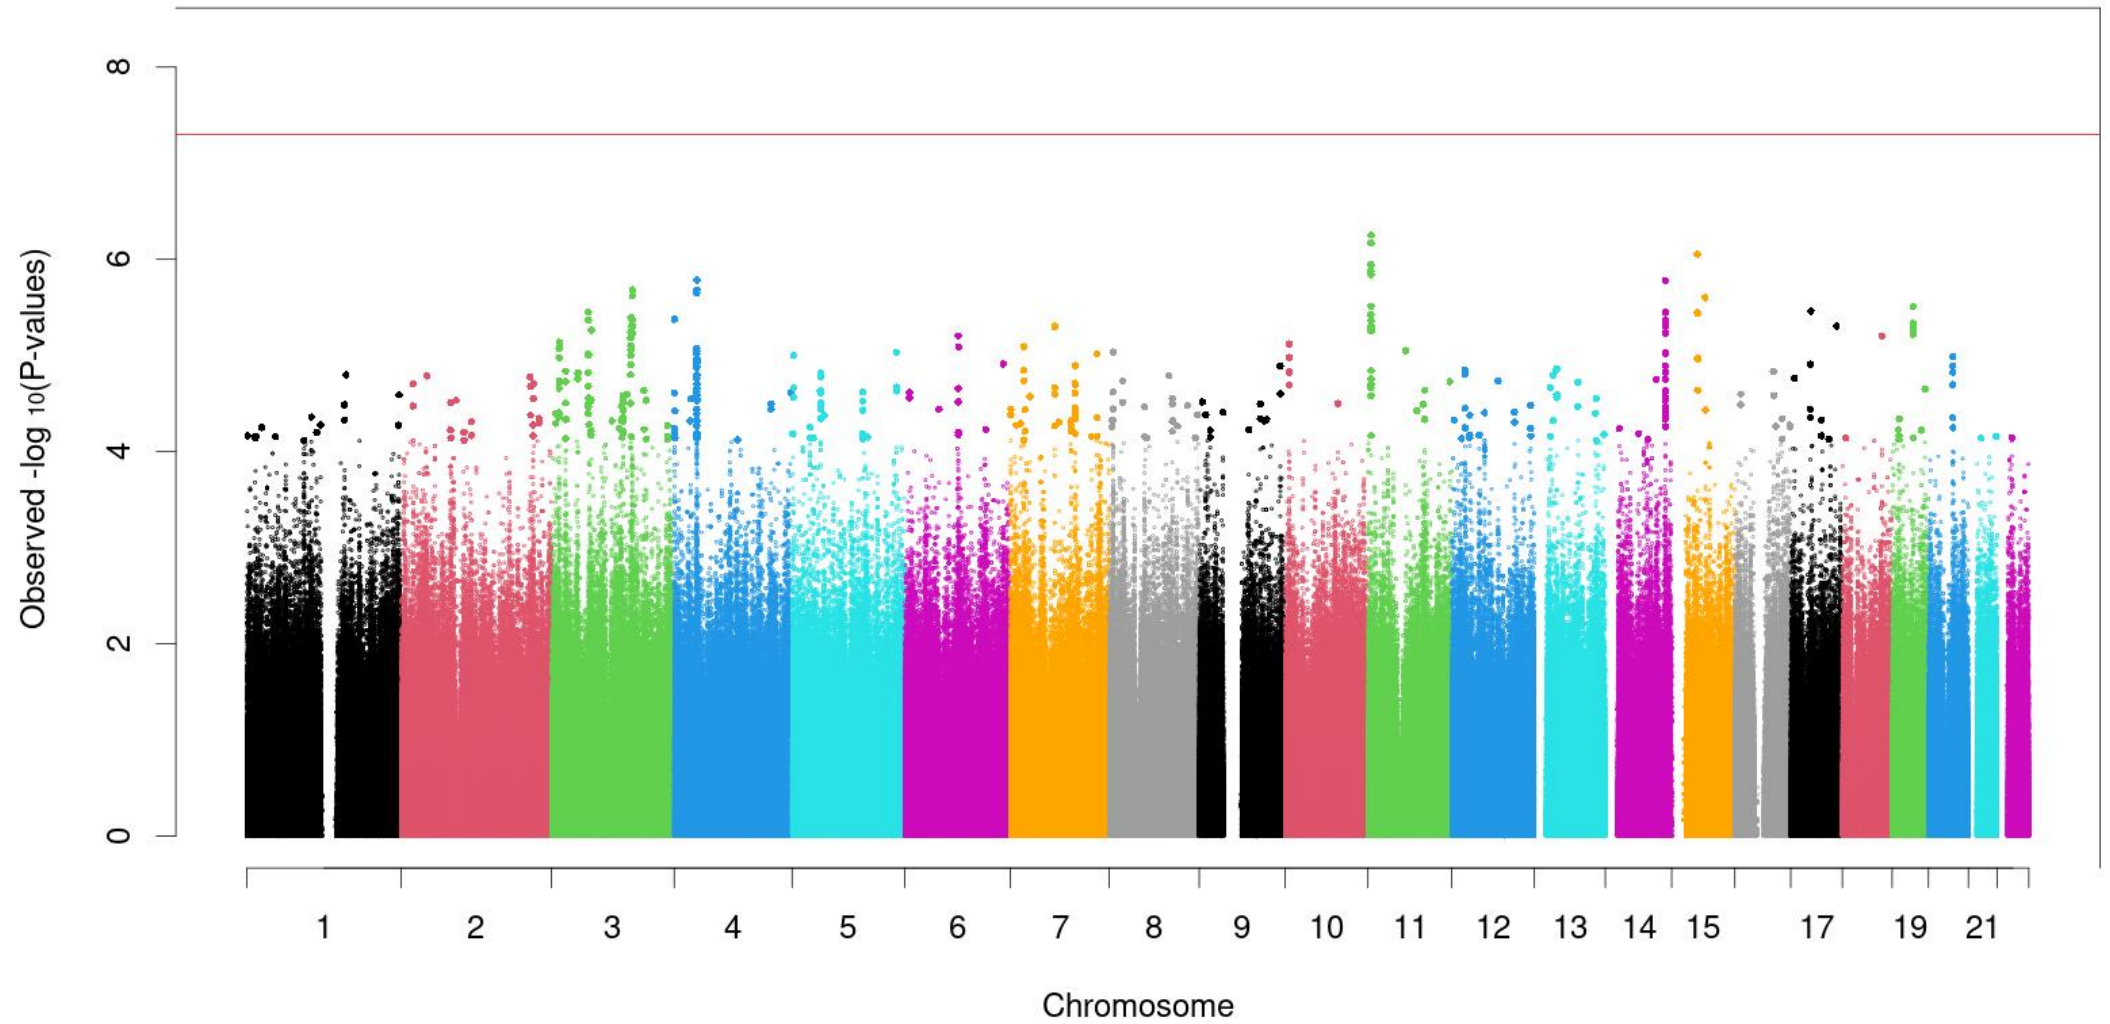

Manhattan plot for mz176.1029\_t90.6, citrulline

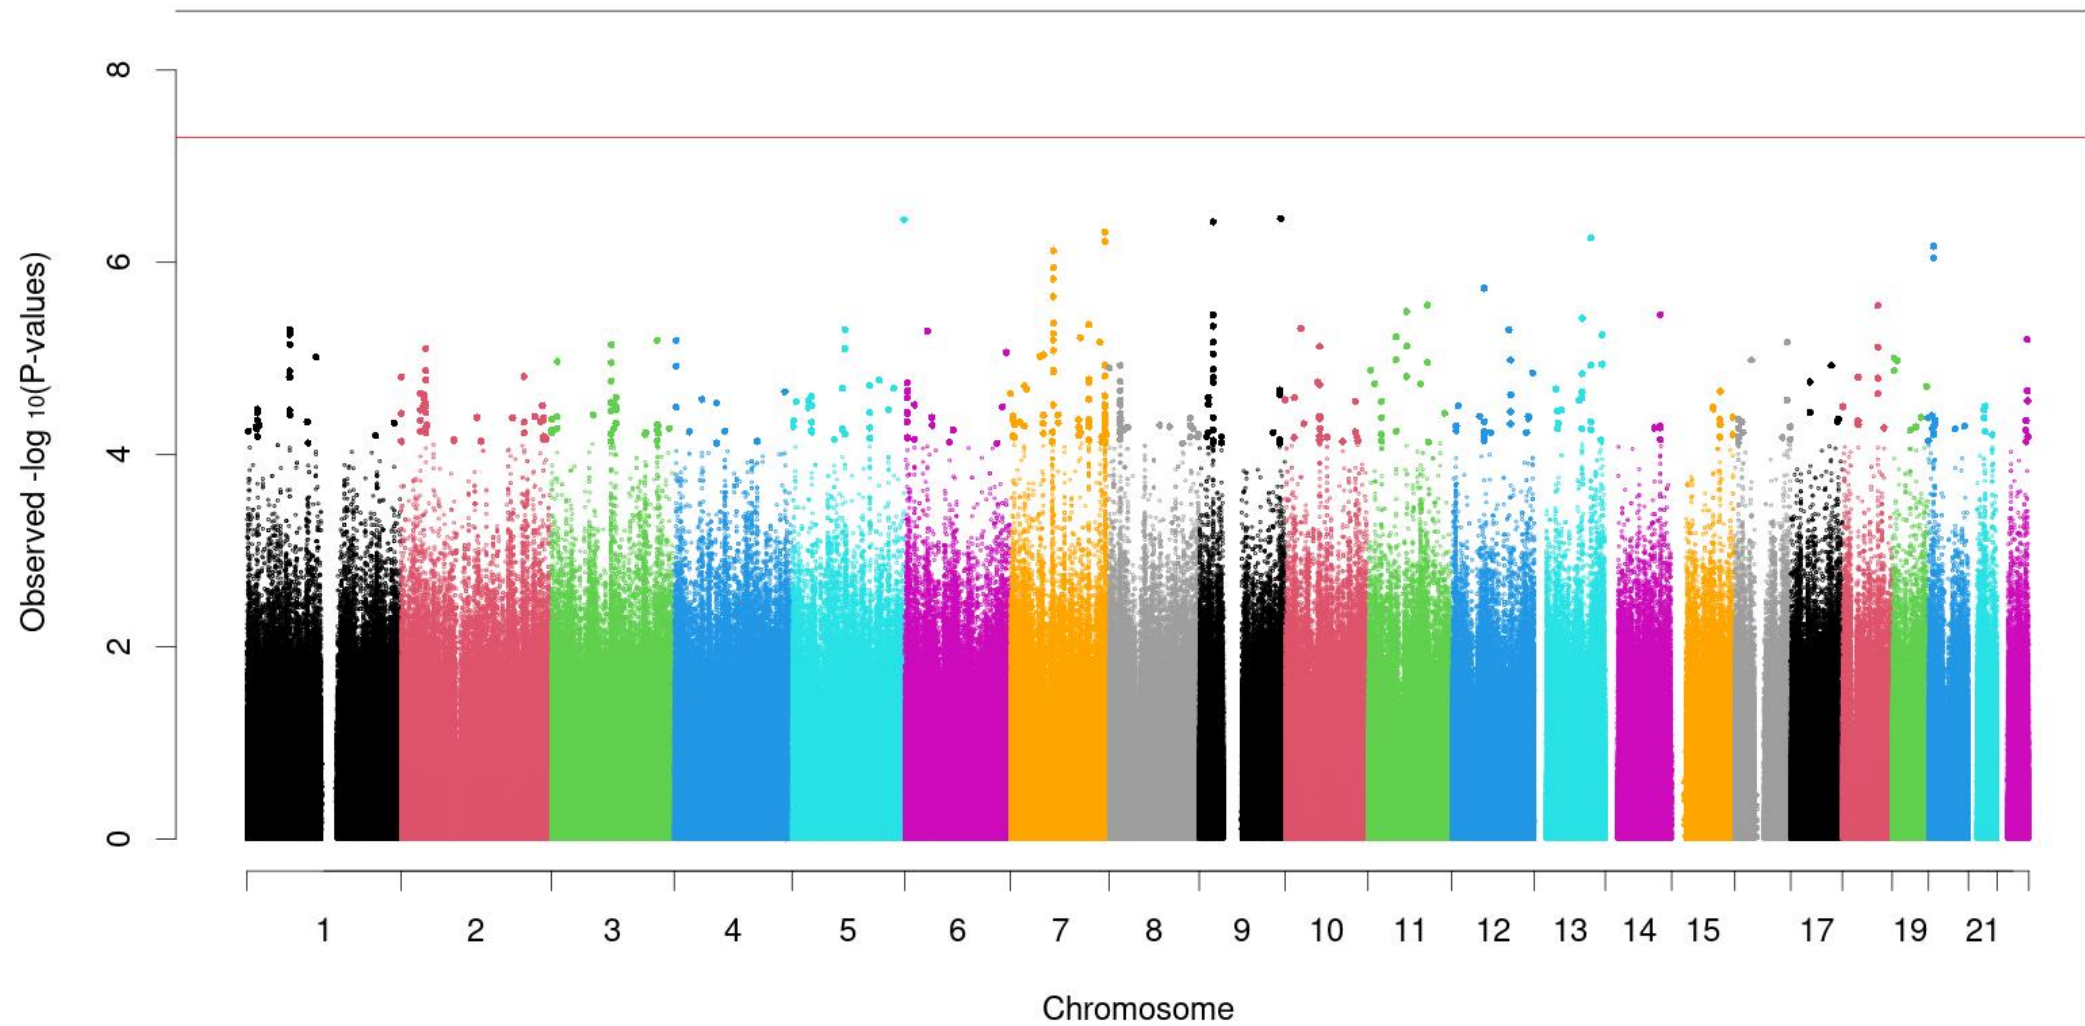

Manhattan plot for mz177.0405\_t19.7, d-gulonic acid gama-lactone

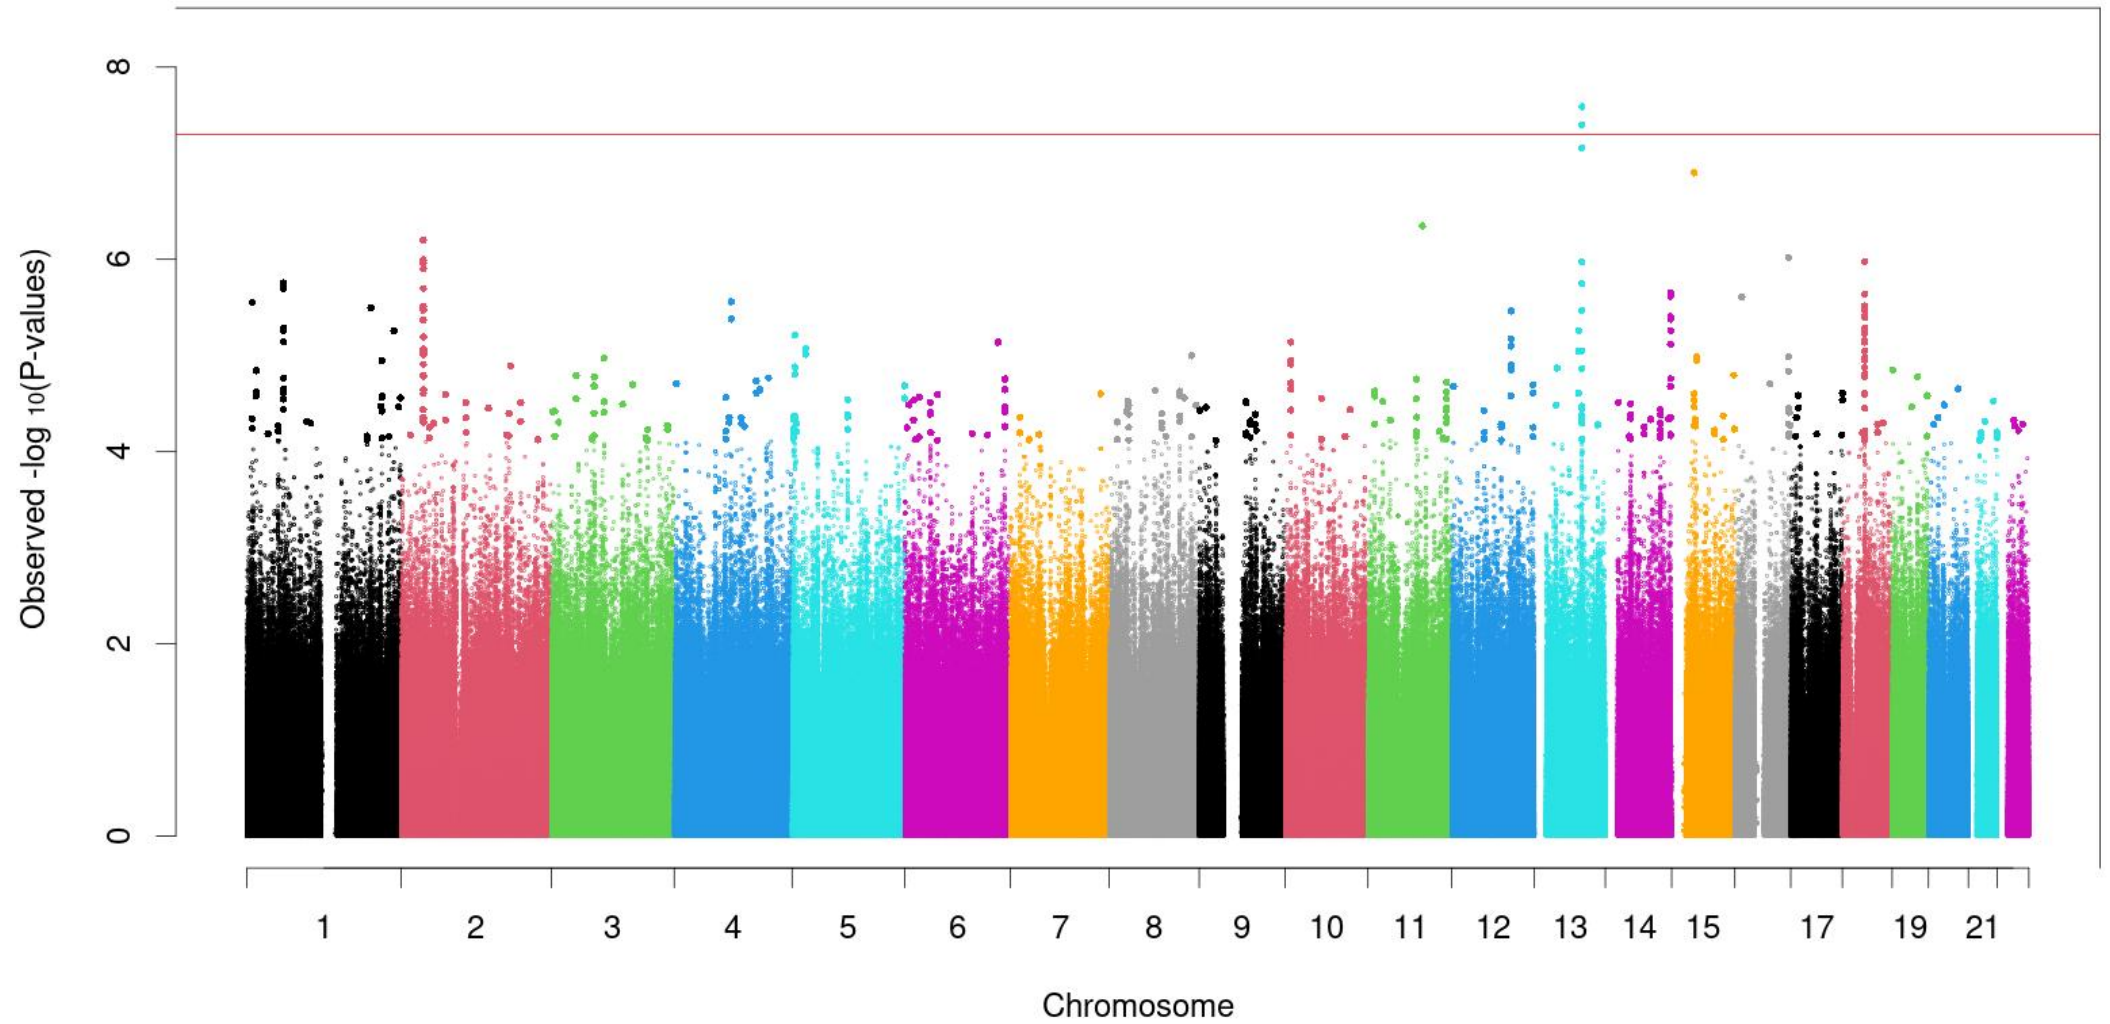



Manhattan plot for mz178.051\_t30.3, hippurate

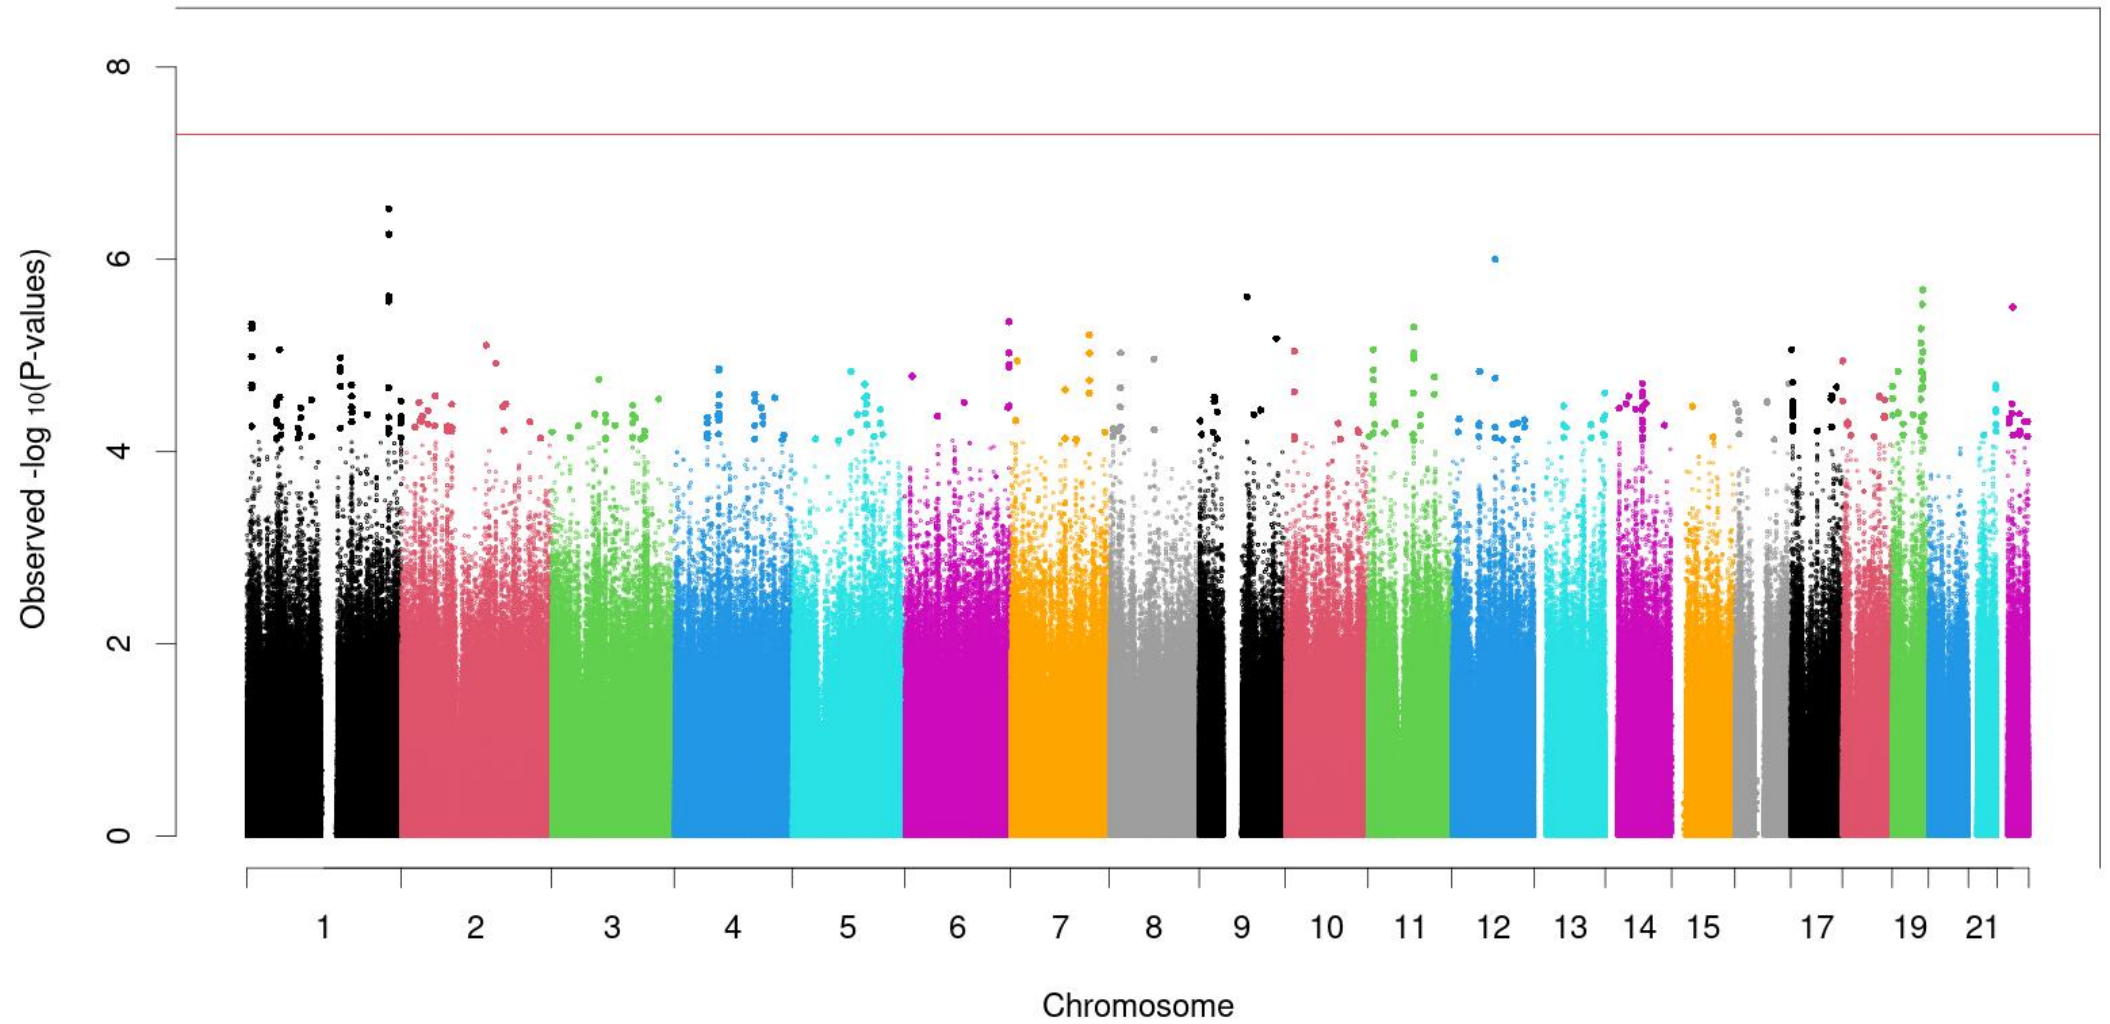

Manhattan plot for mz178.0533\_t51.9, formyl-L-methionyl peptide

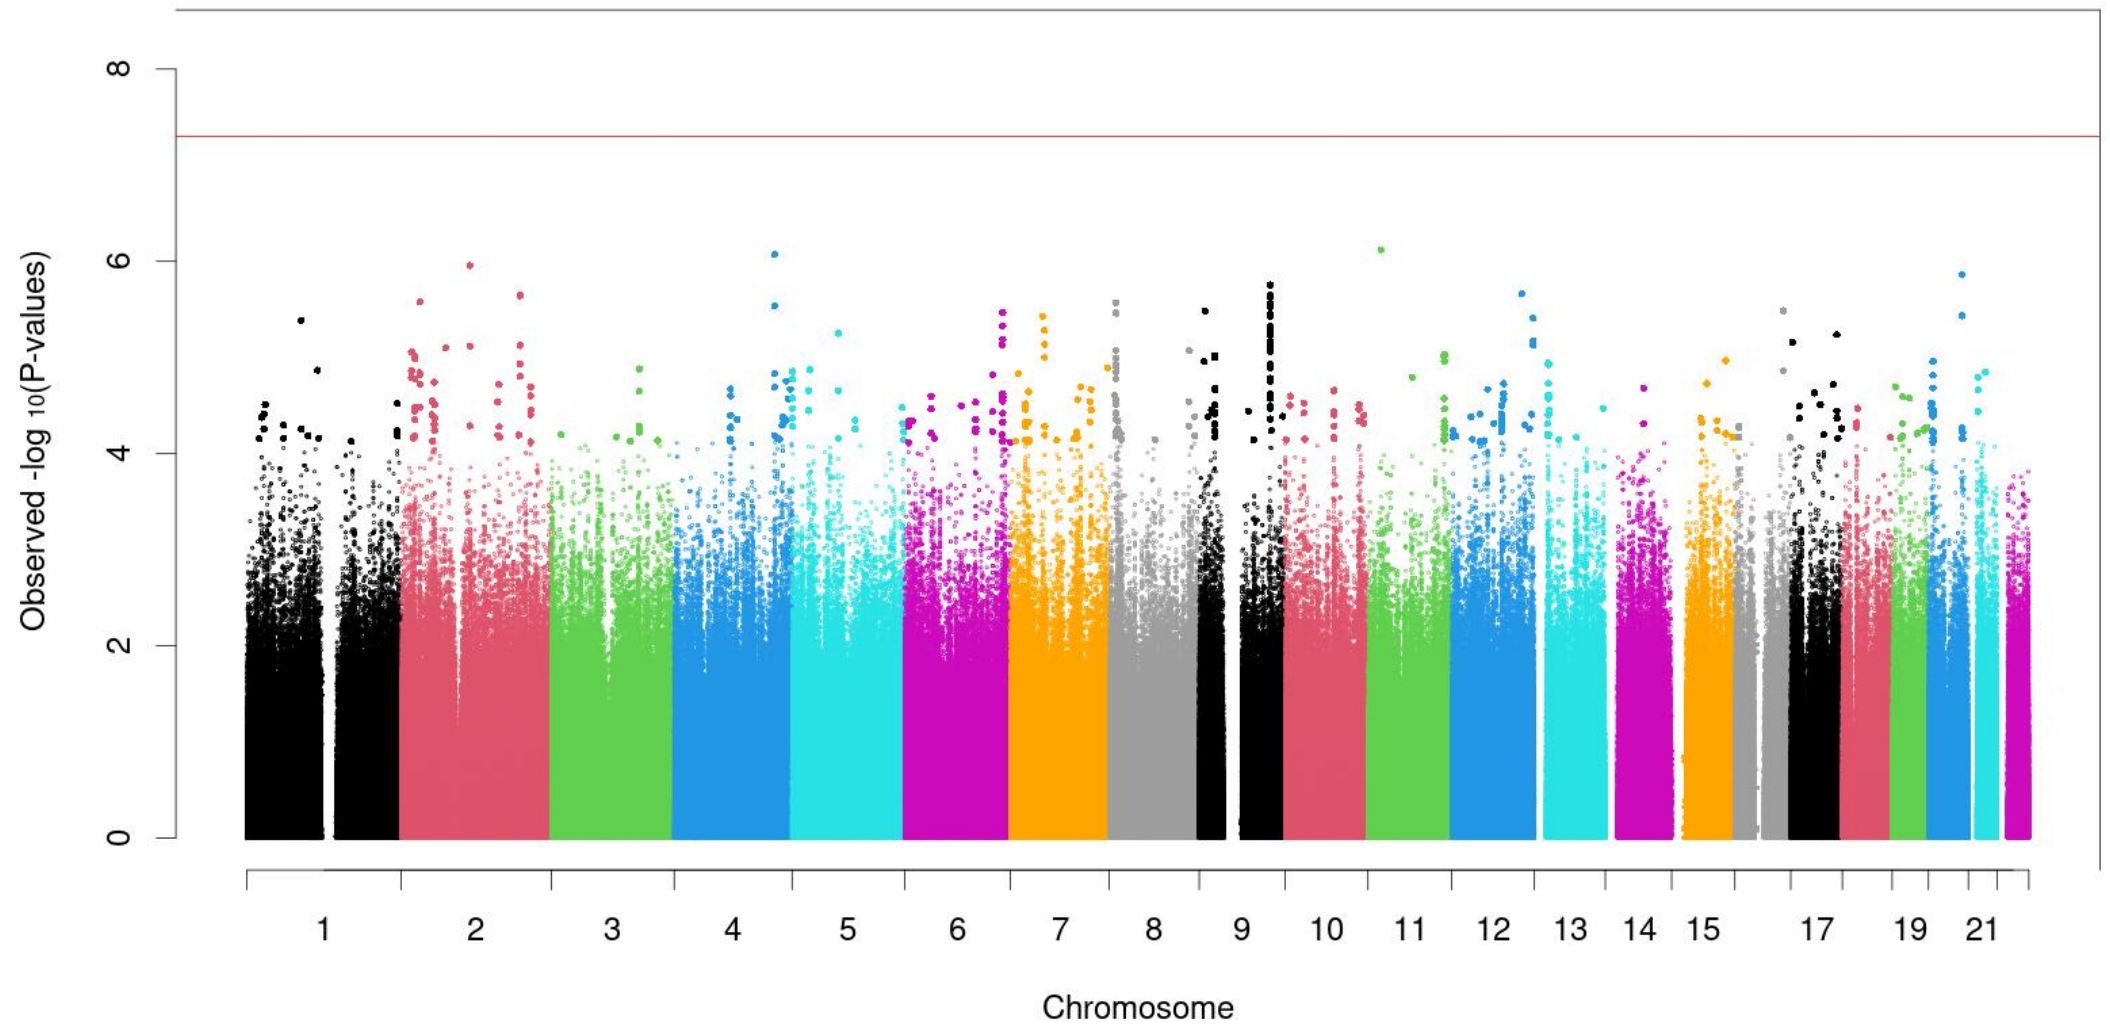

Manhattan plot for mz179.035\_t25.5, caffeate

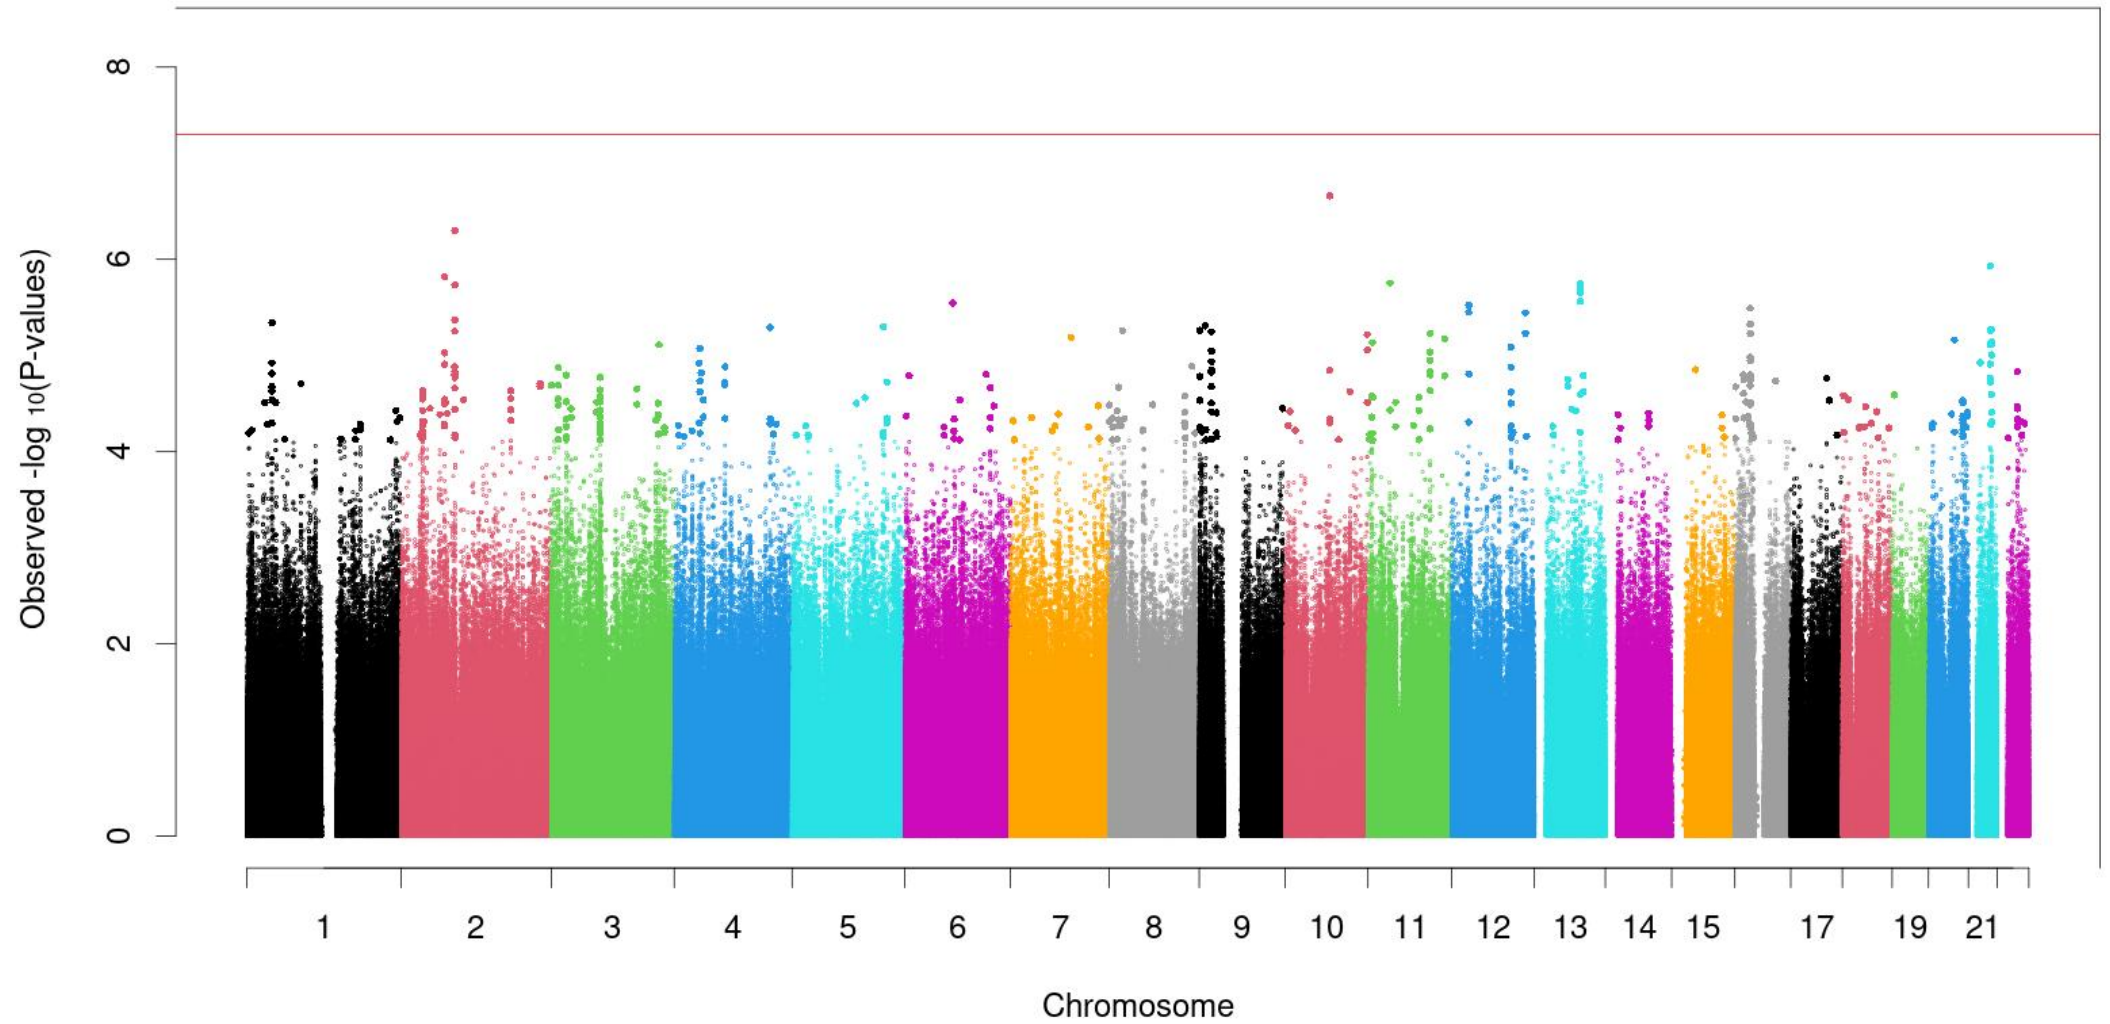



Manhattan plot for mz180.0329\_t57.5, s-carboxymethyl-L-cysteine

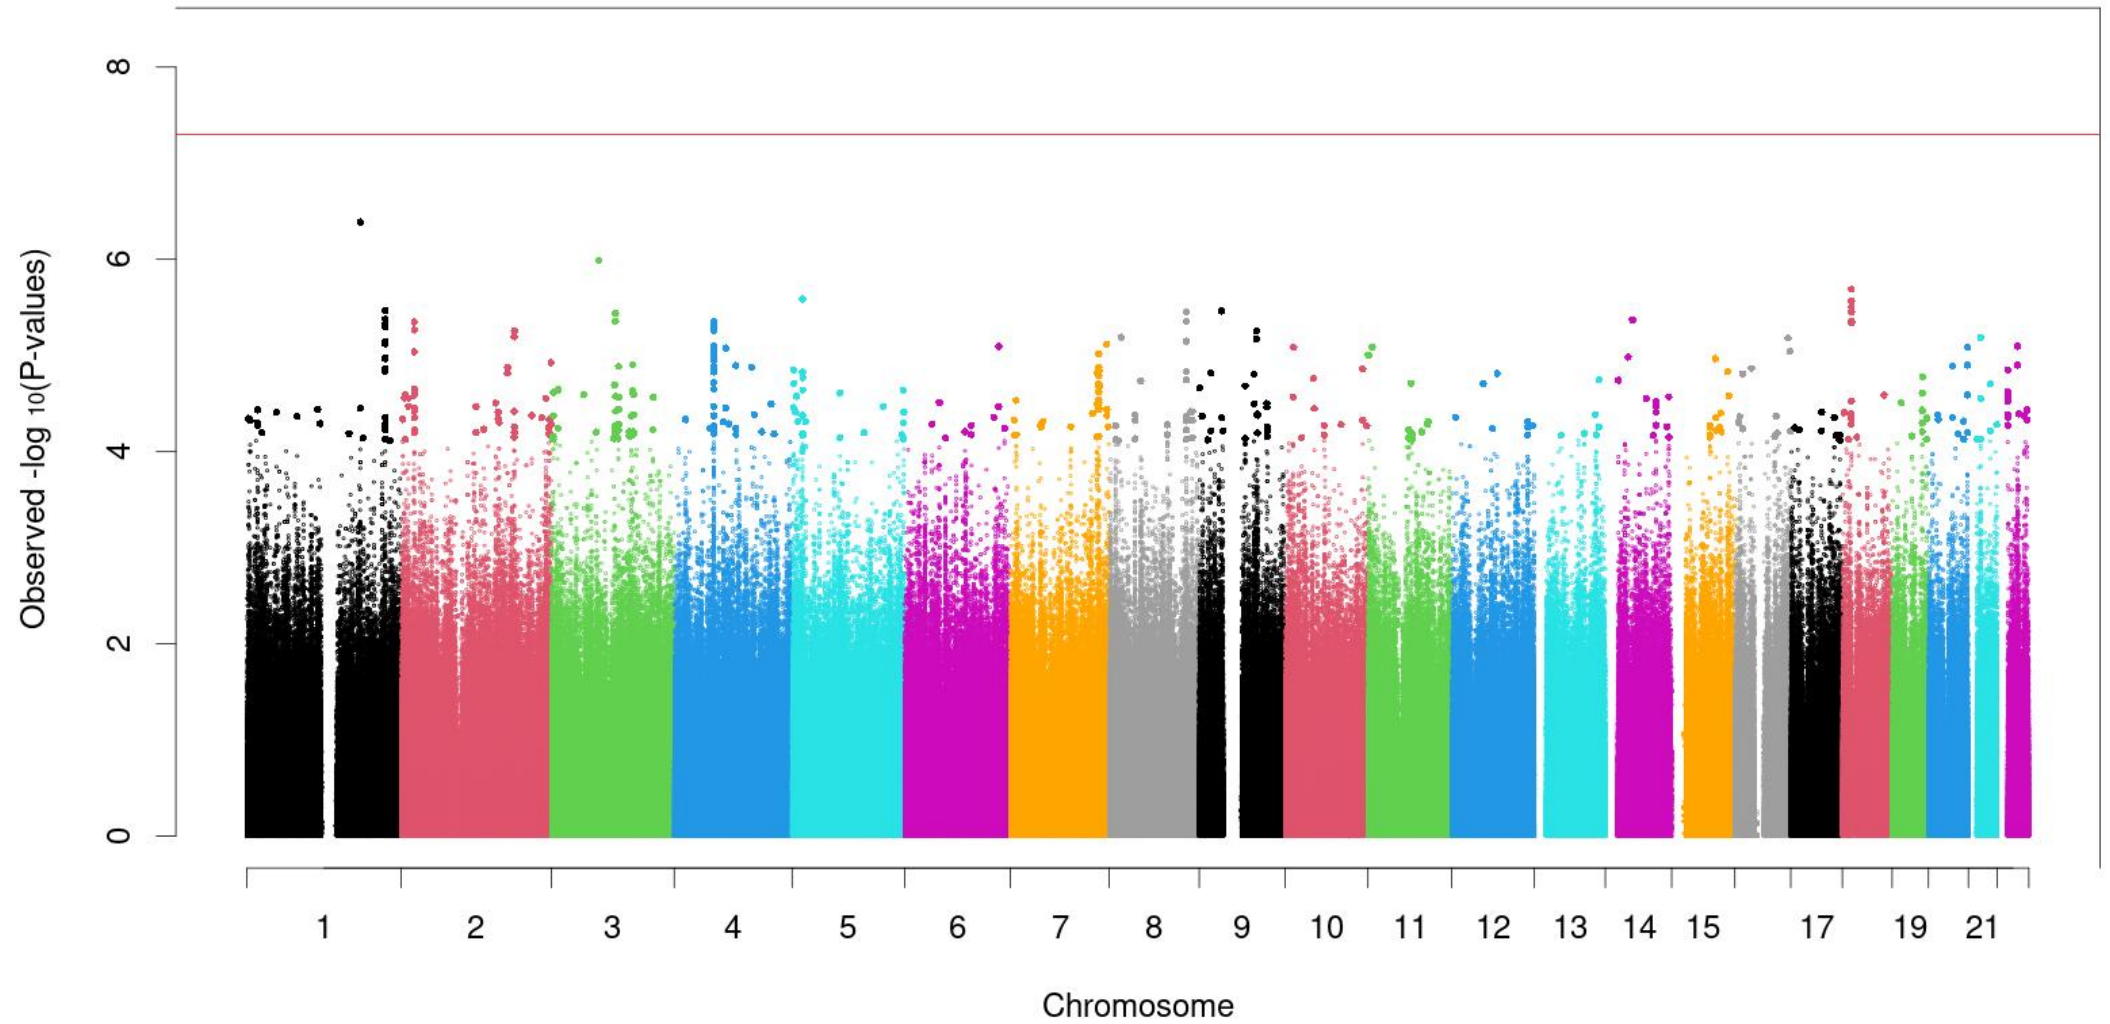

Manhattan plot for mz180.1019\_t47.4, 1-methyl-6,7-dihydroxy-1,2,3,4-tetrahydroisoquinoline

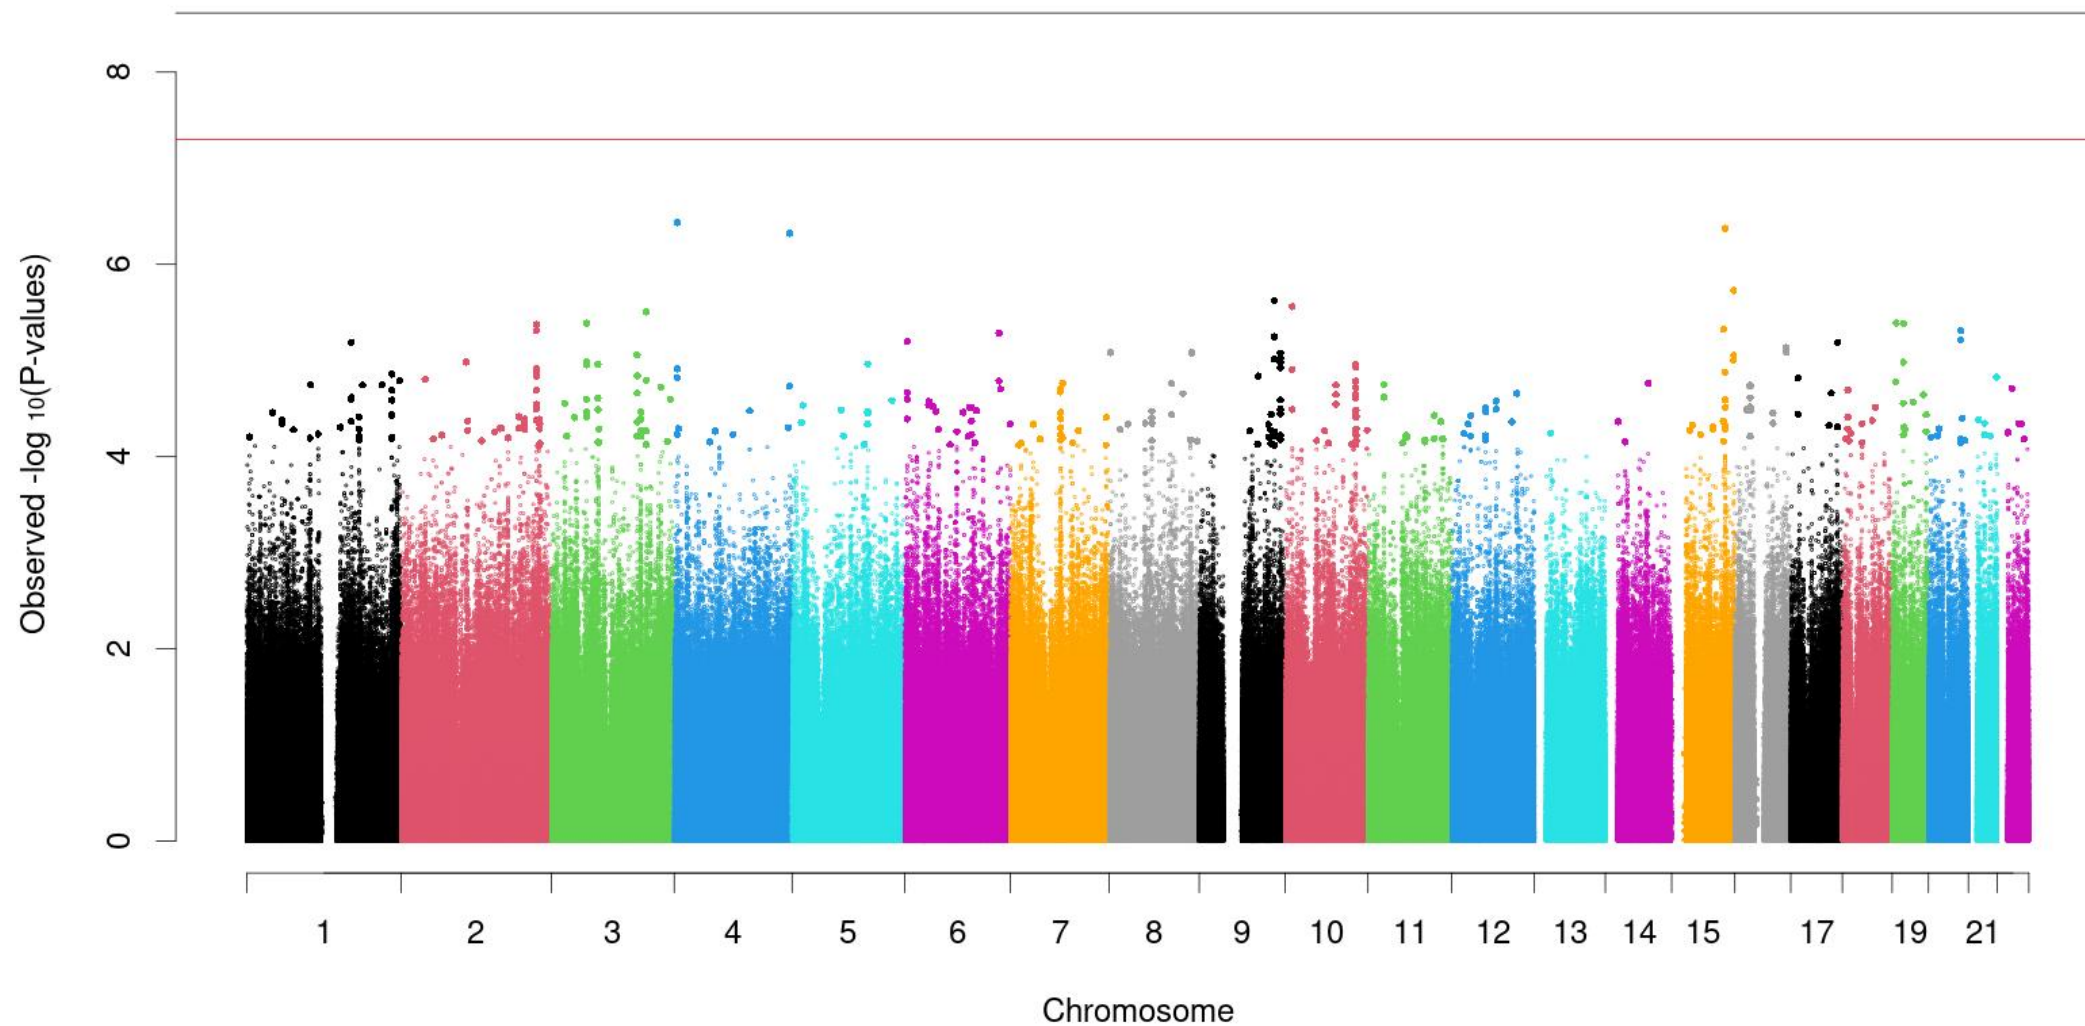

Manhattan plot for mz182.0811\_t55.8, tyrosine

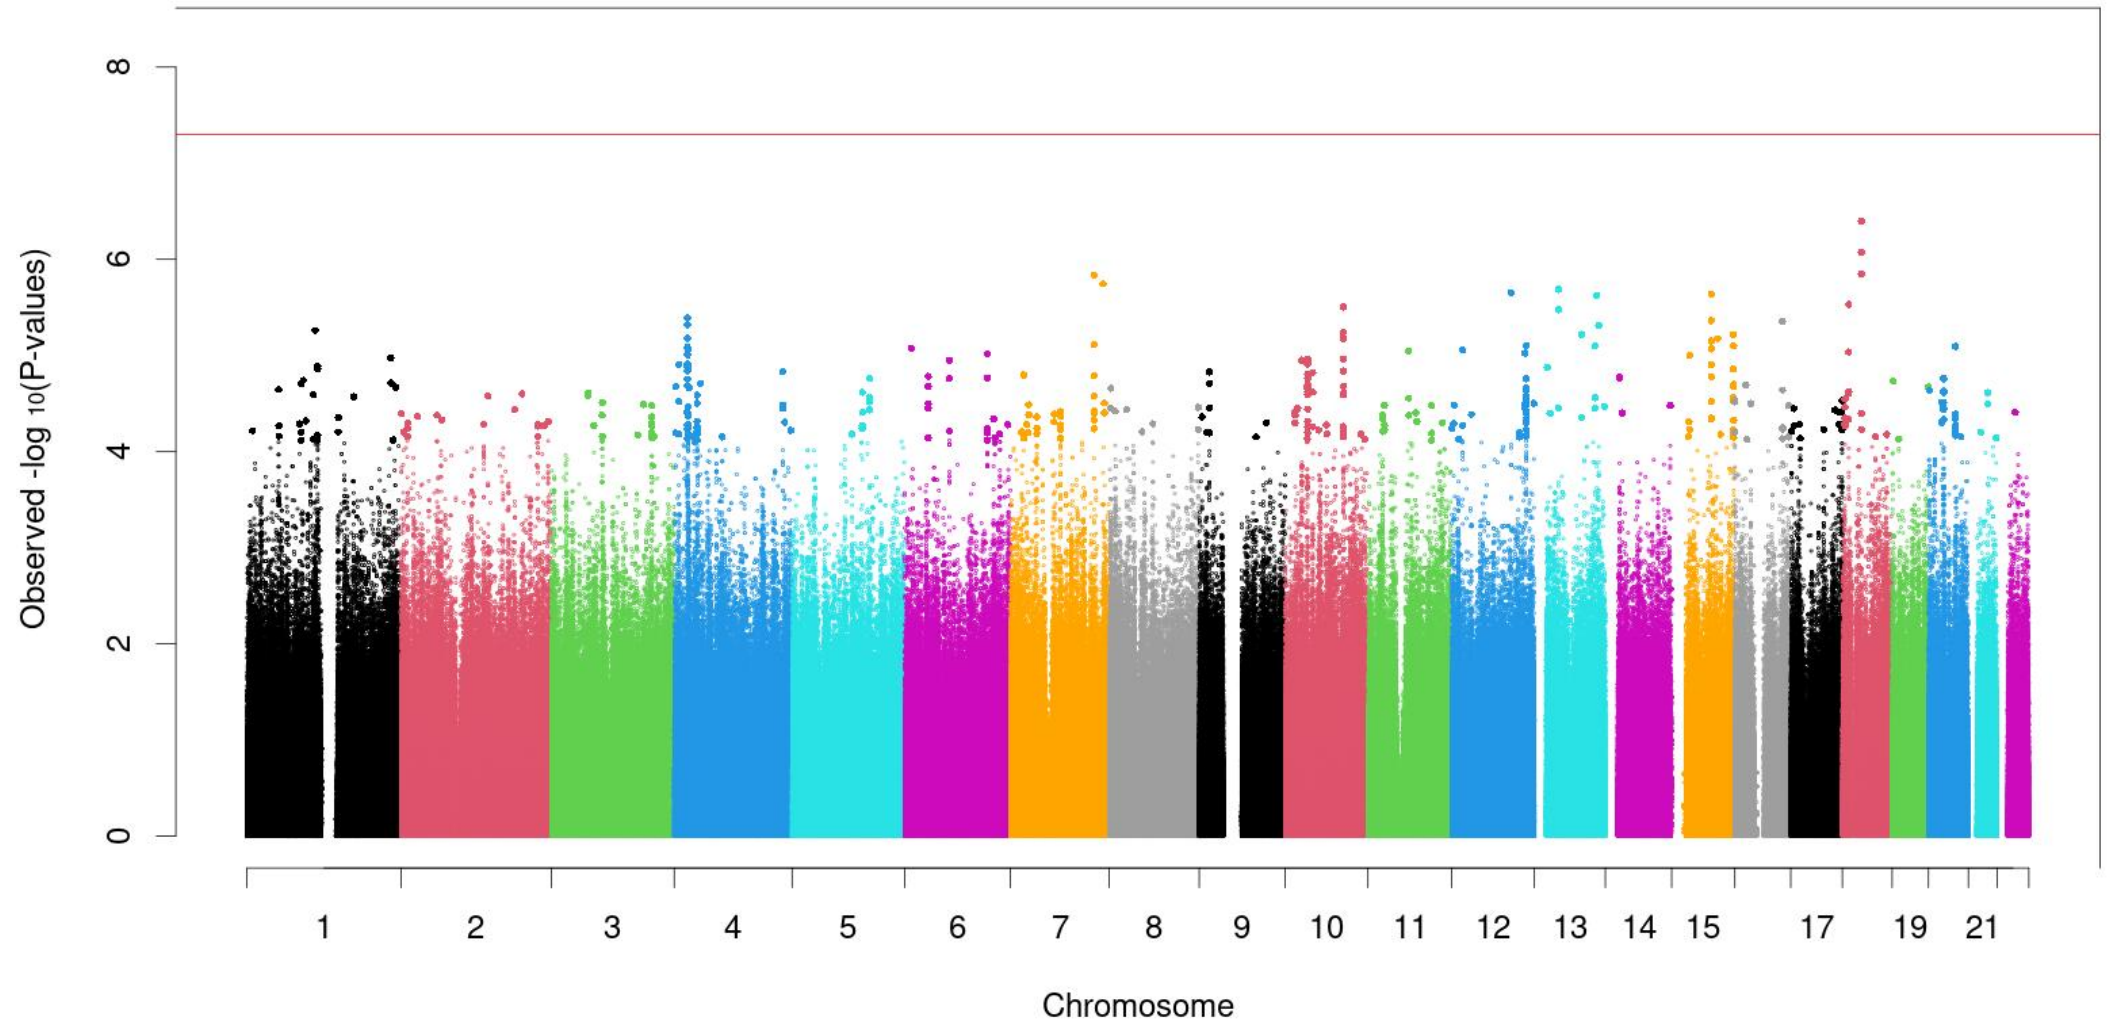



Manhattan plot for mz184.0603\_t21, 4-pyridoxate

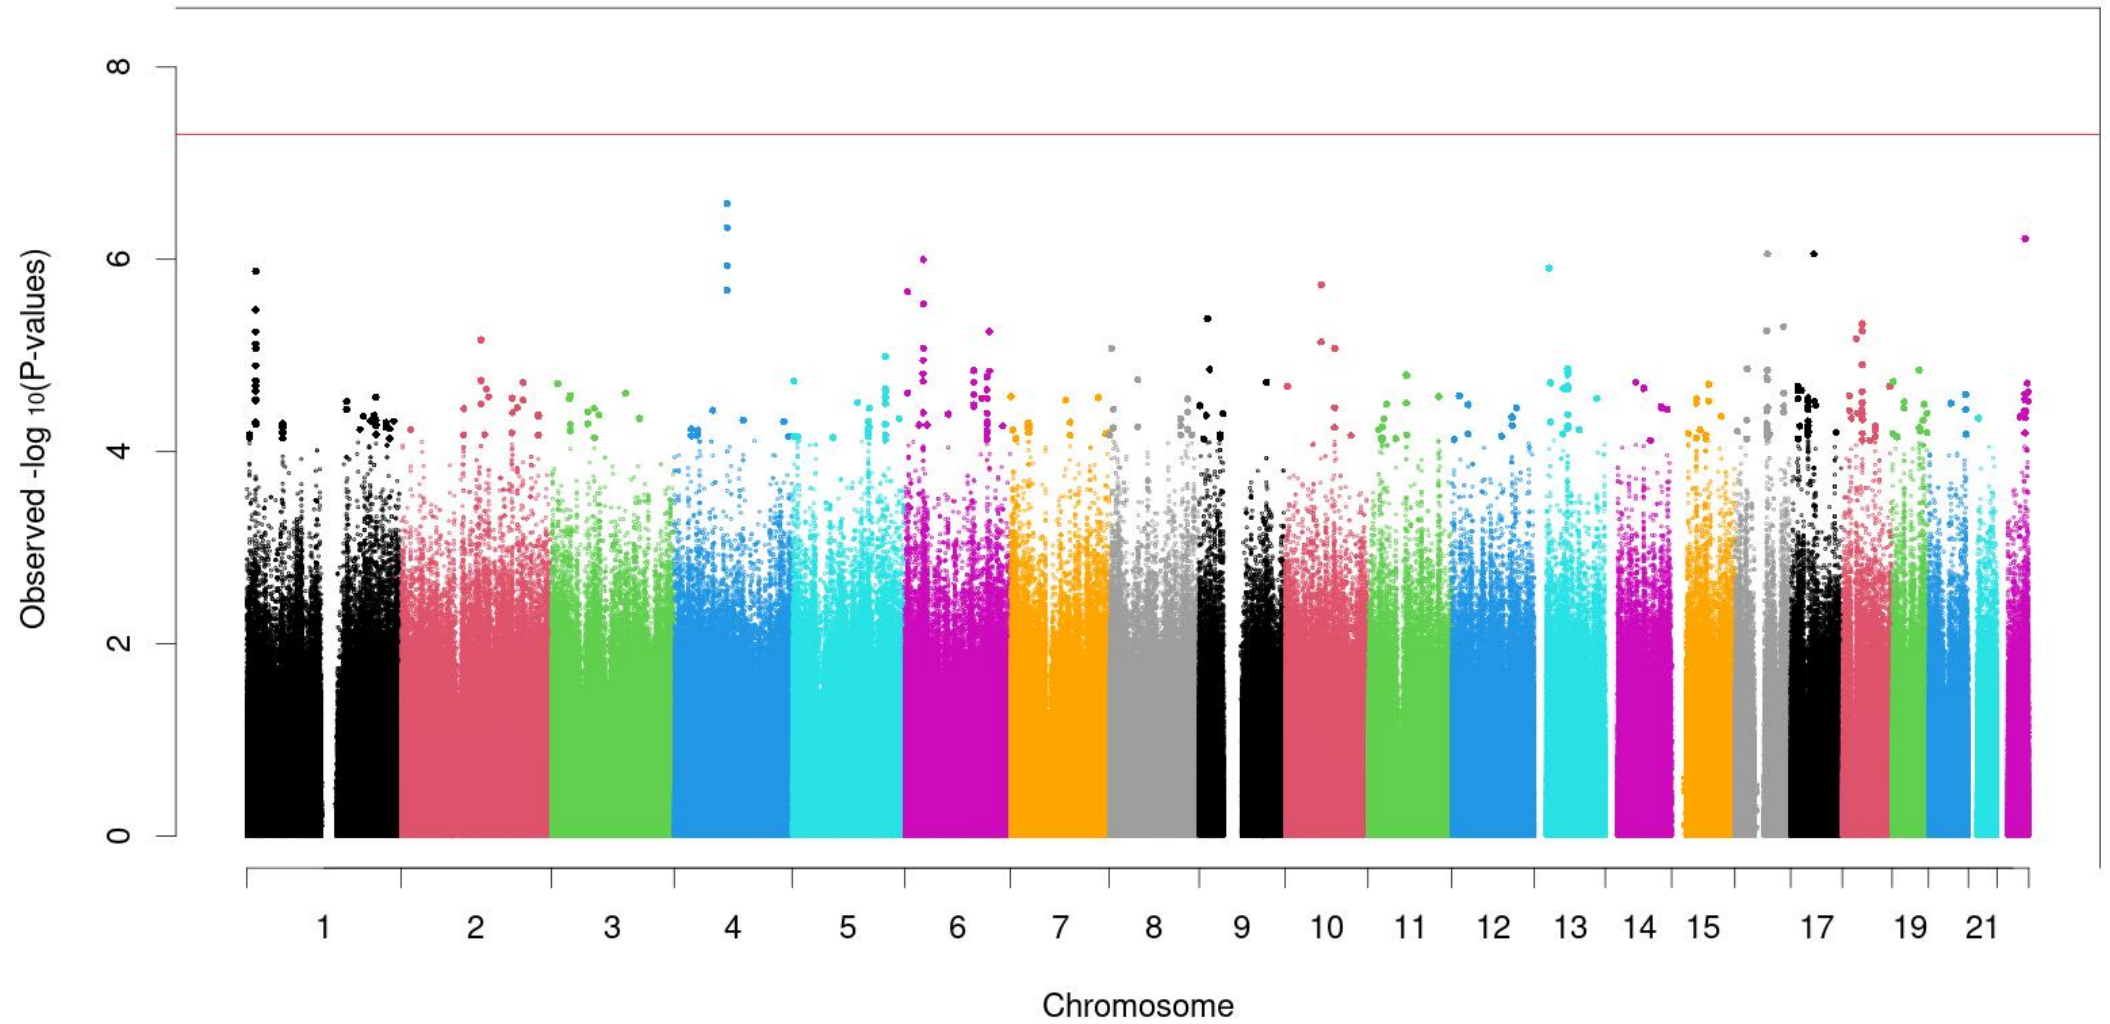

Manhattan plot for mz189.088\_t31.9, II-2,6-diaminoheptanedioate

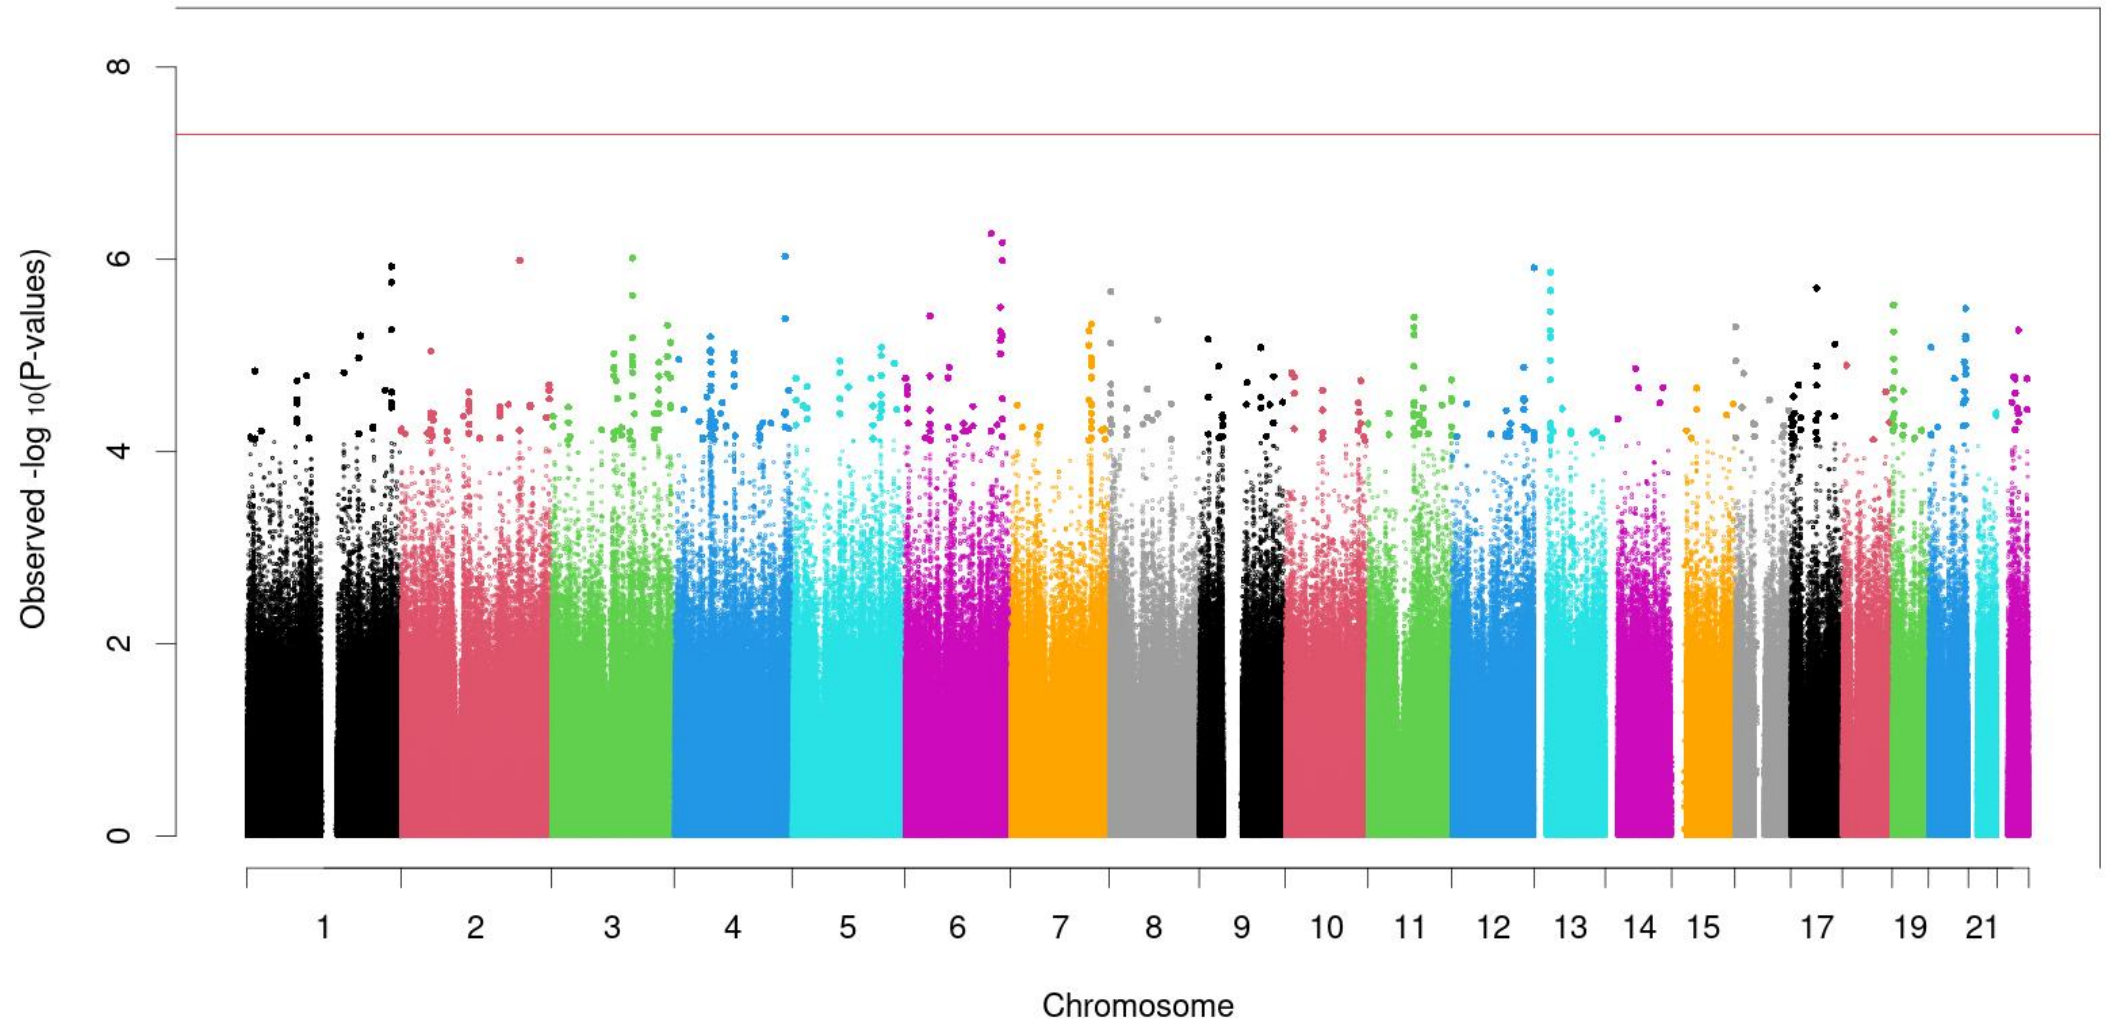

Manhattan plot for mz189.1233\_t69.3, nalpha-acetyl-L-lysine

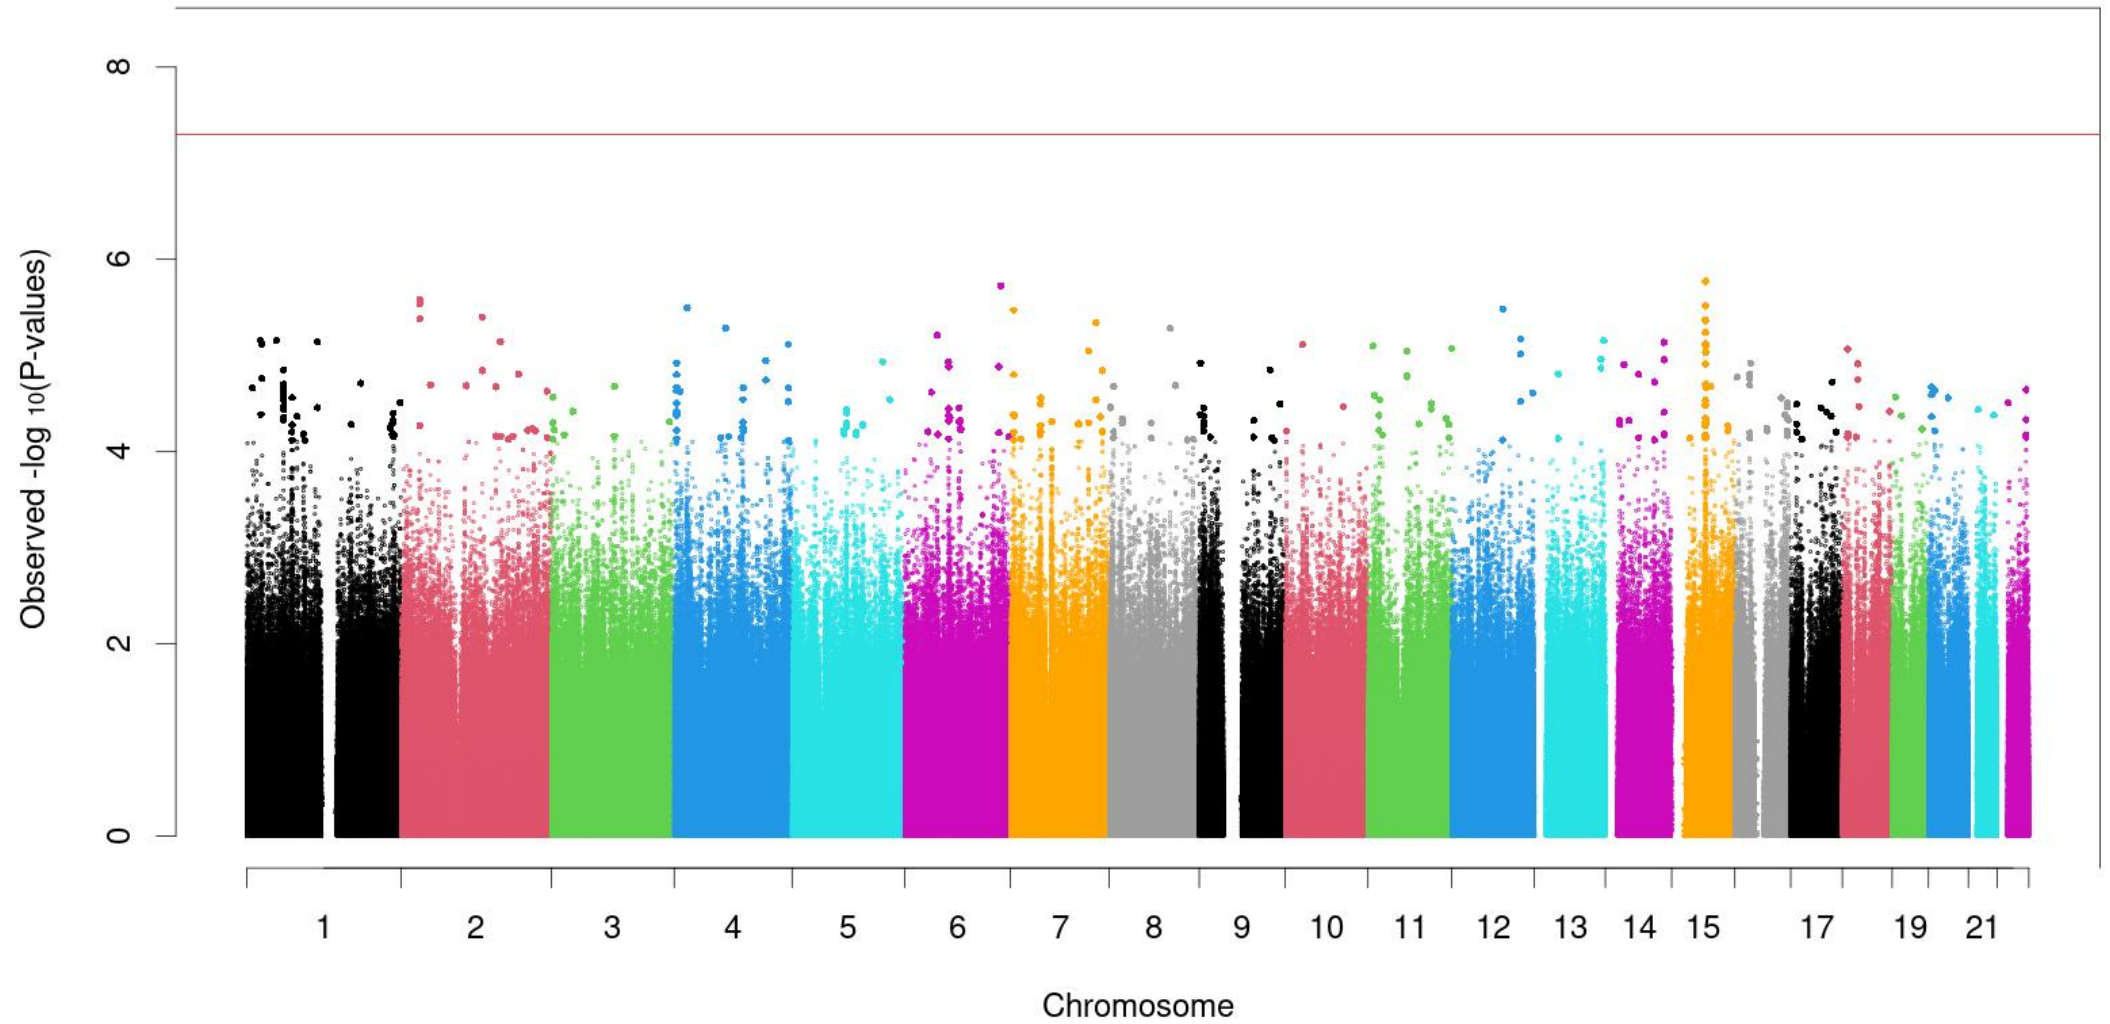



Manhattan plot for mz190.0496\_t20, 4-hydroxy-2-quinolinecarboxylic acid

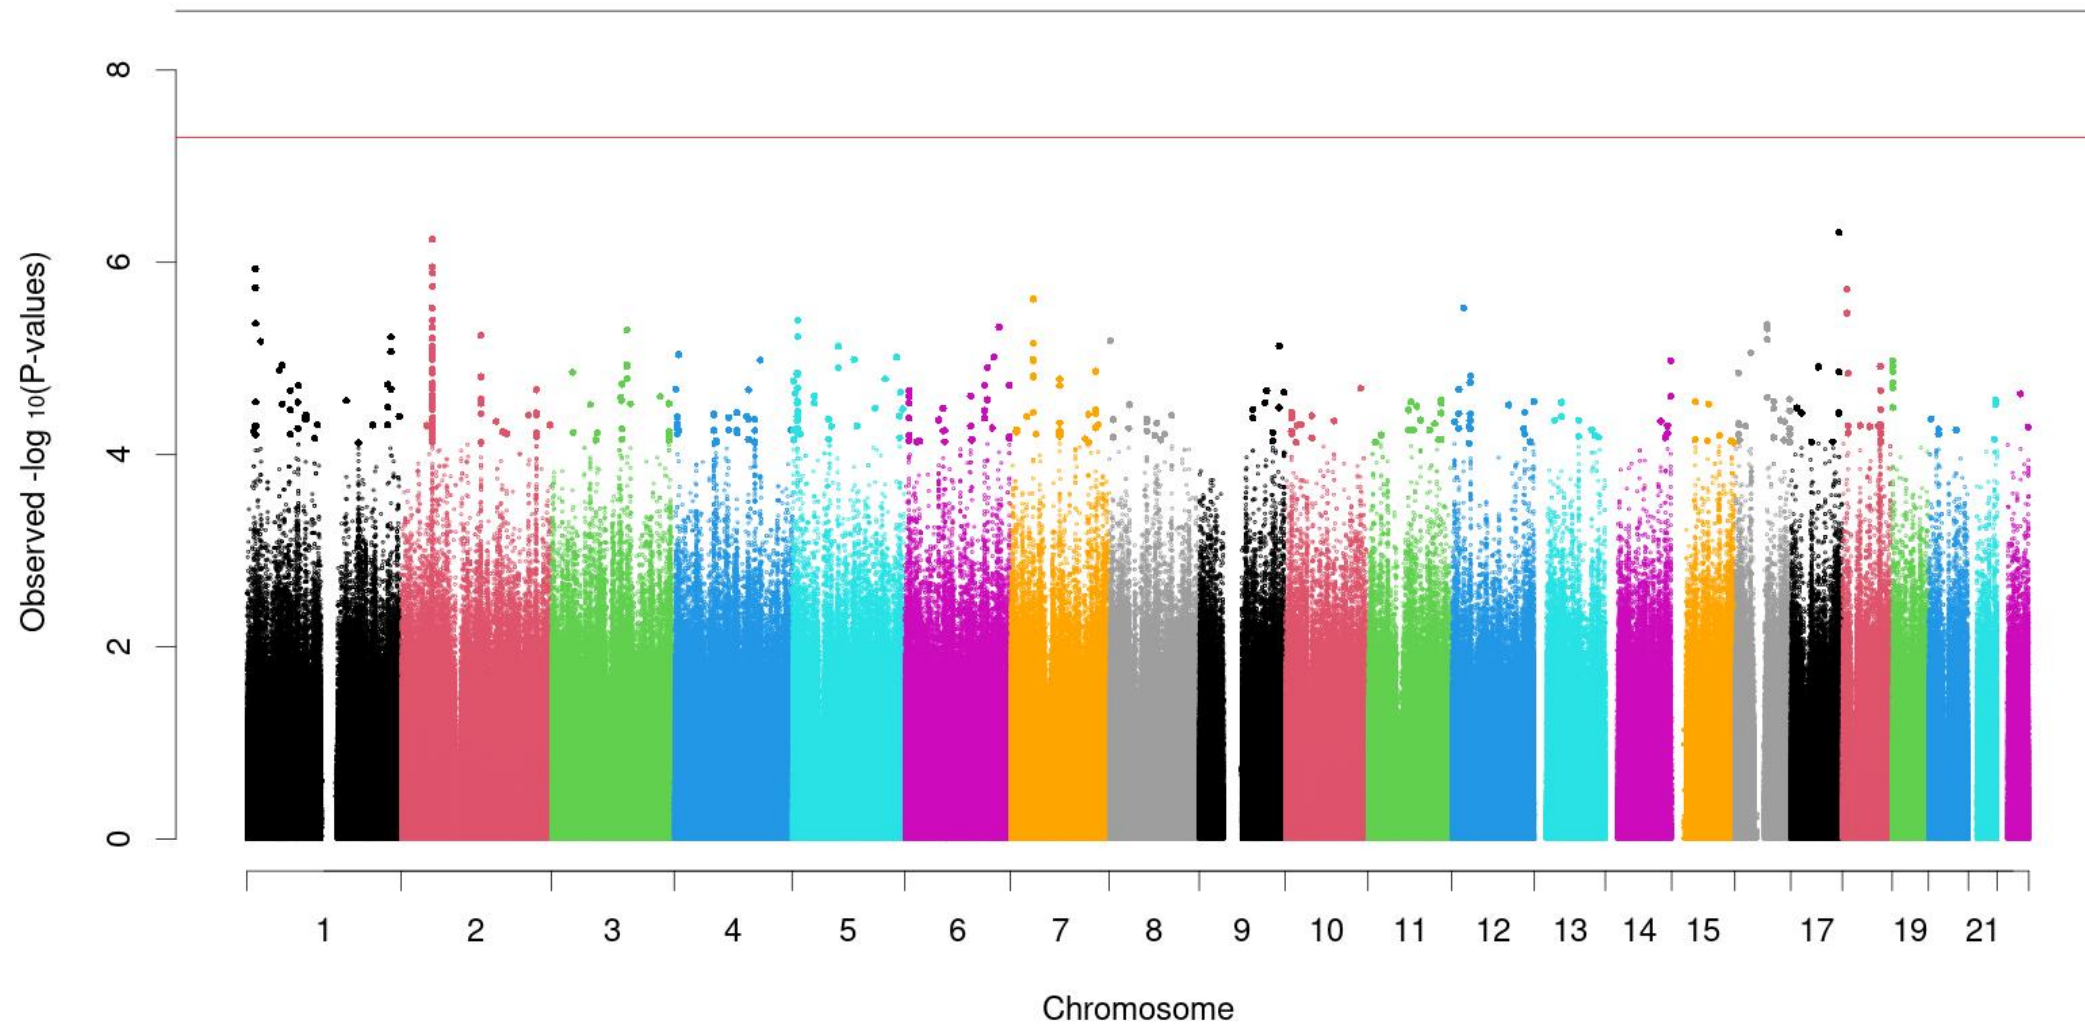

Manhattan plot for mz190.0544\_t27.4, n-acetyl-dl-methionine

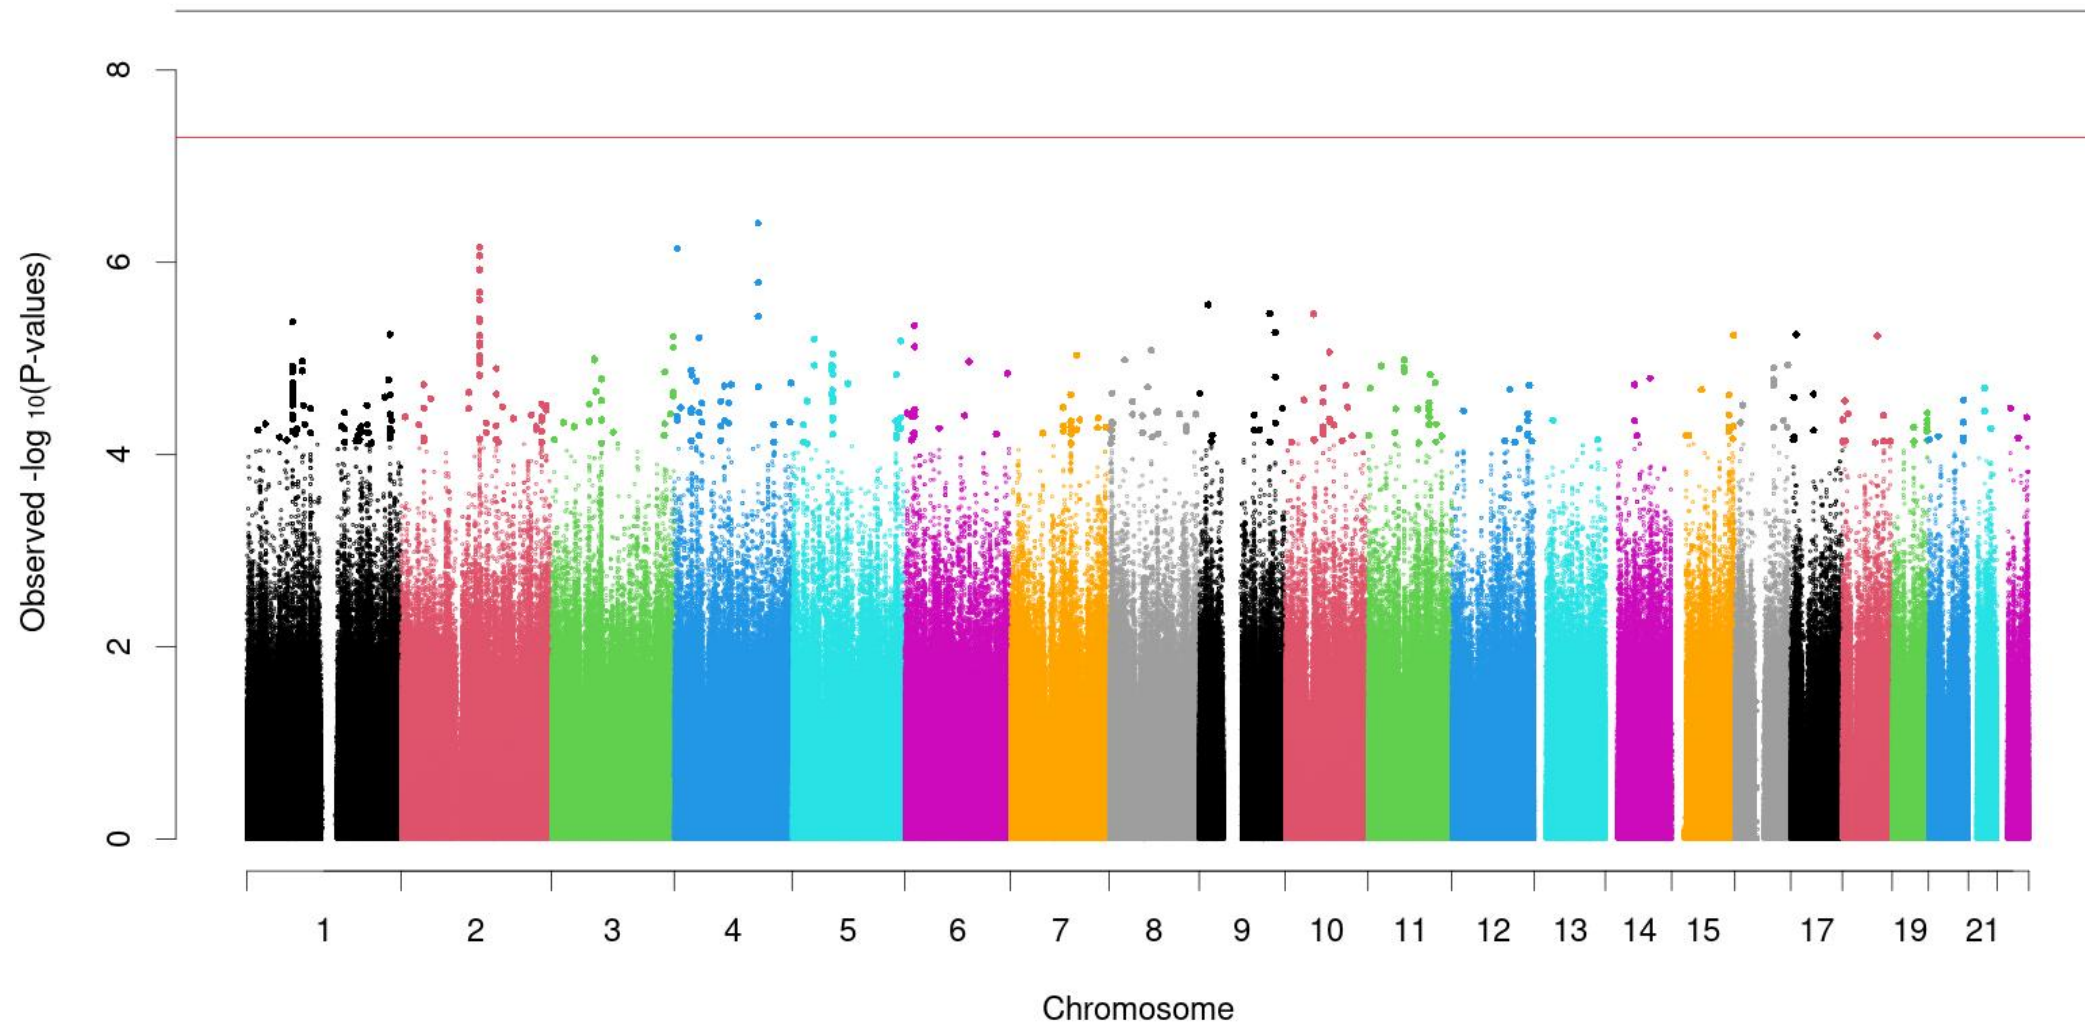

Manhattan plot for mz192.0655\_t46.6, 5-hydroxyindoleacetate

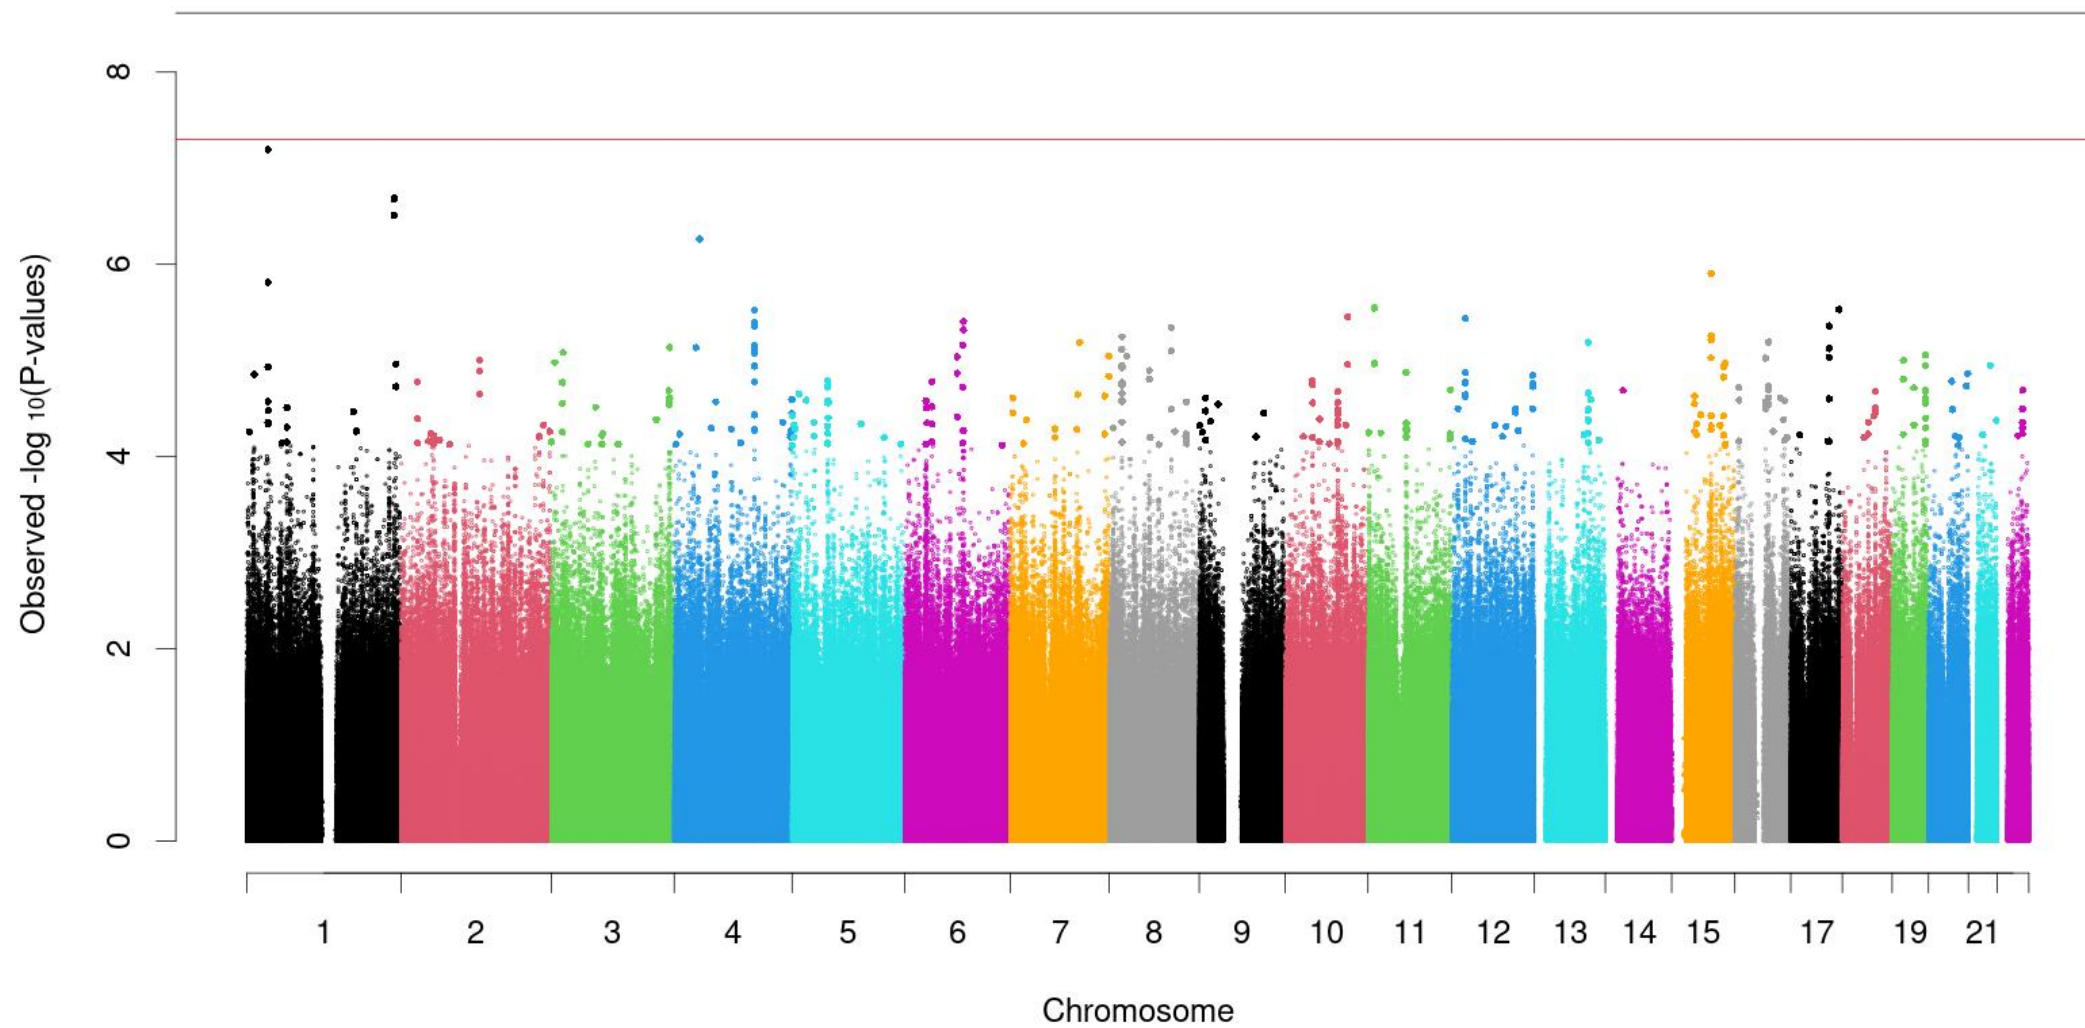



Manhattan plot for mz195.0505\_t48.3, d-glucuronic acid

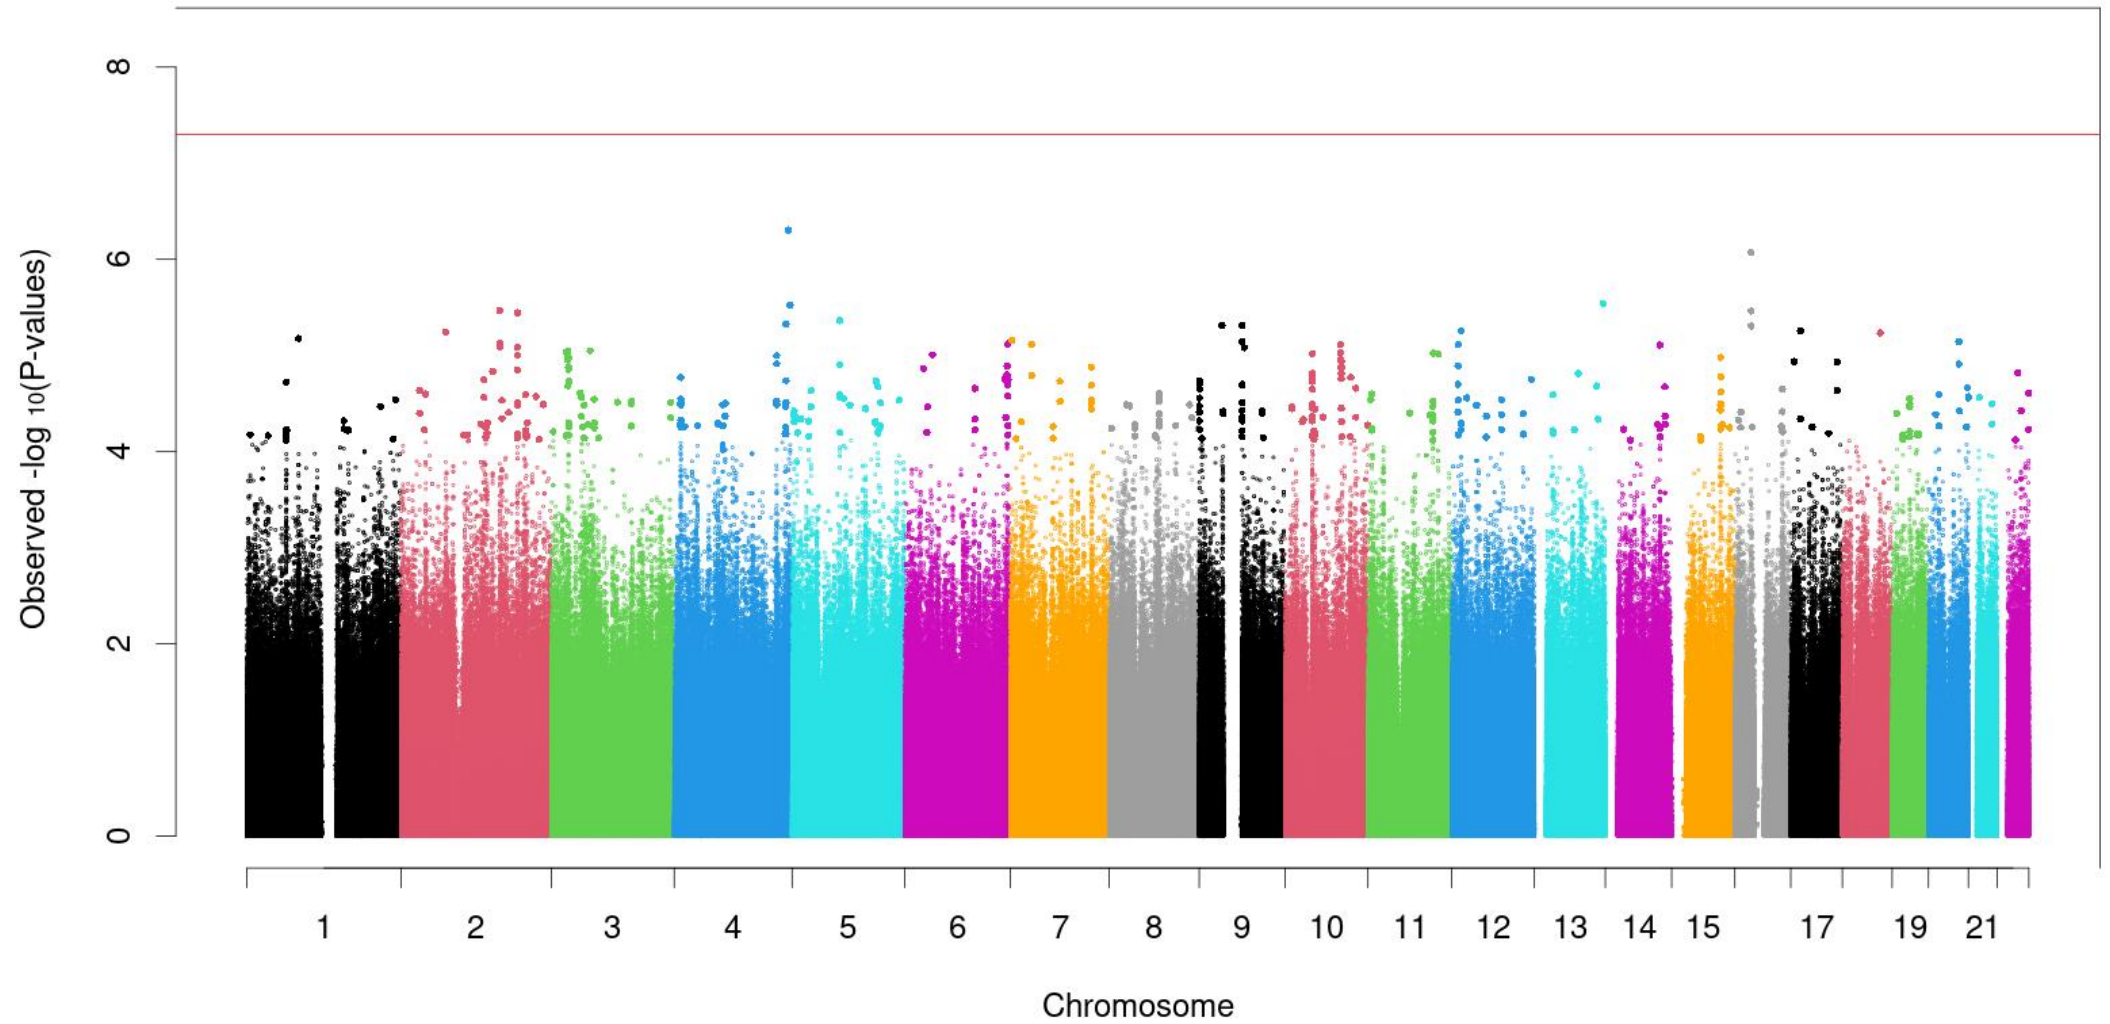

Manhattan plot for mz195.0511\_t23.4, gluconic acid

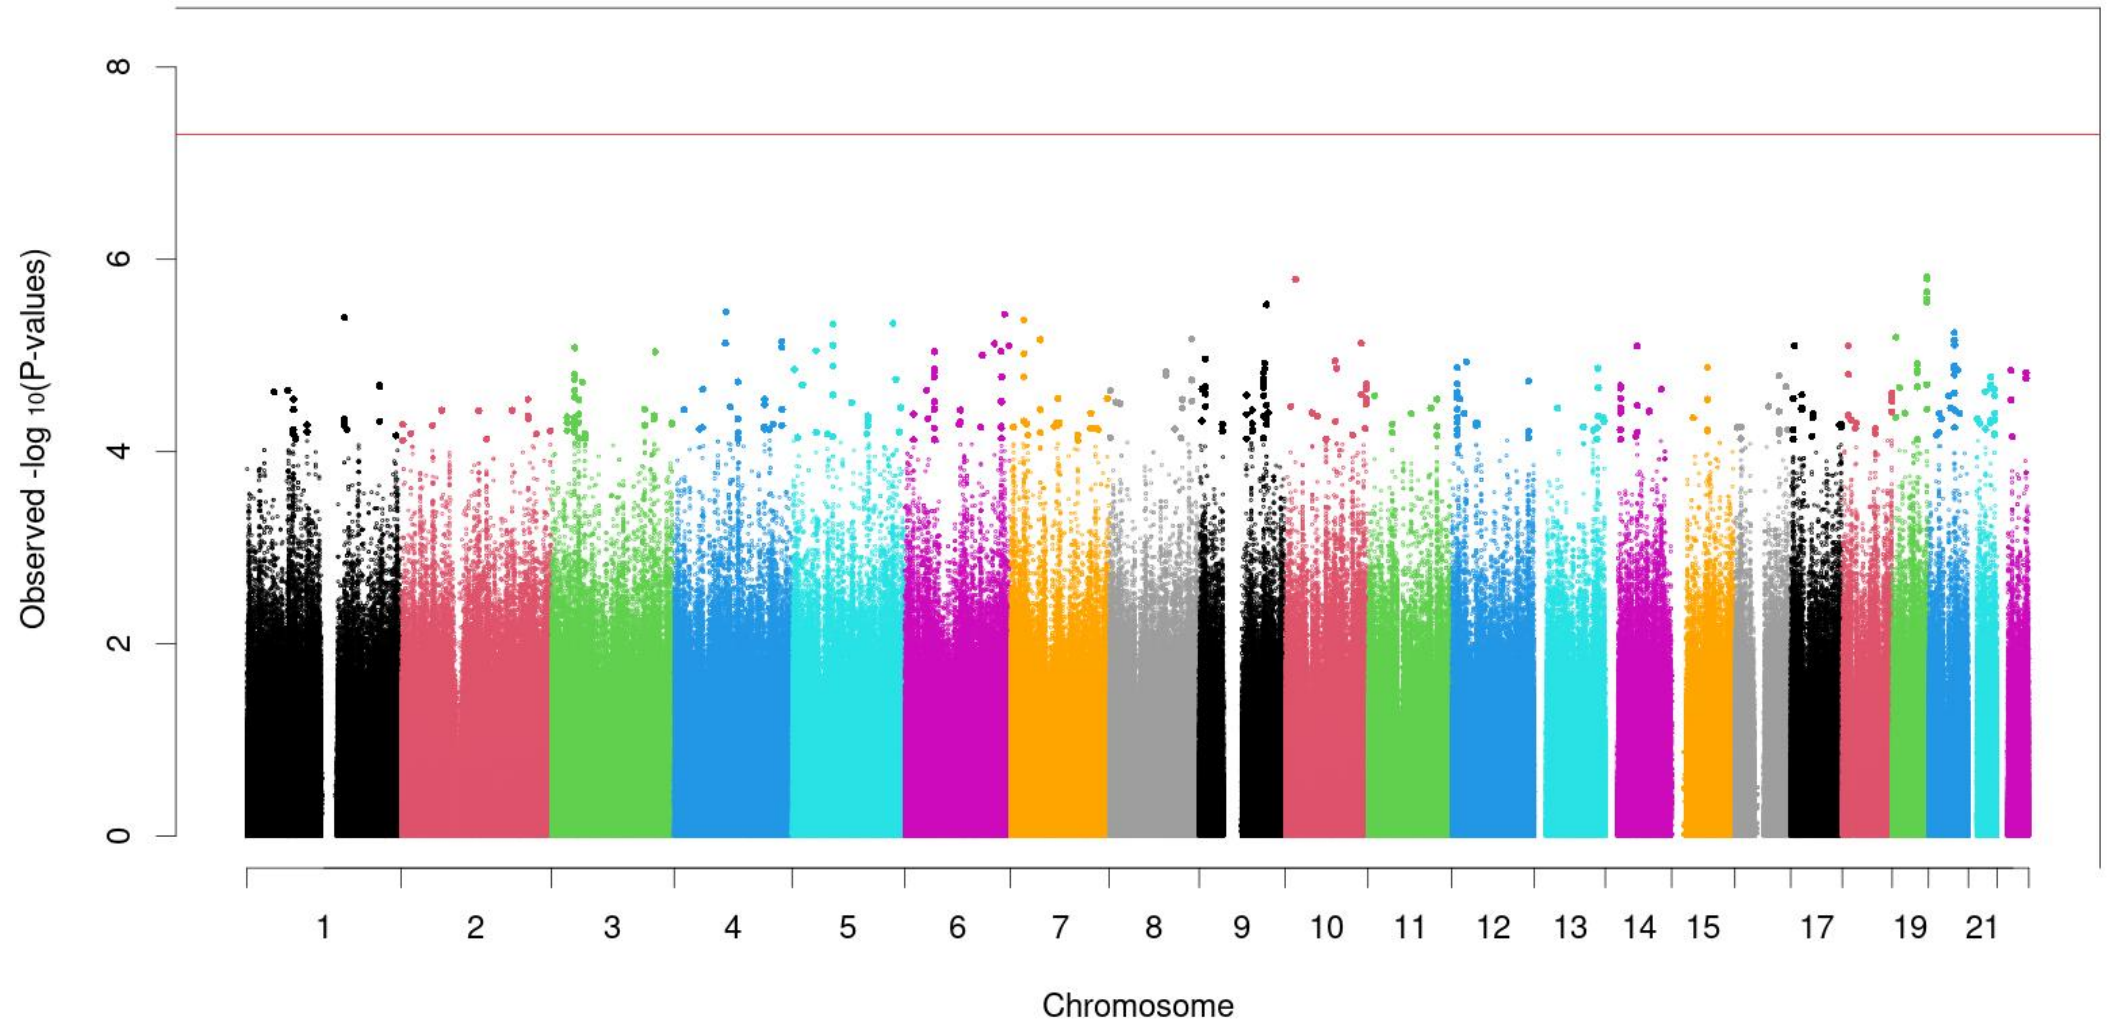

Manhattan plot for mz195.0651\_t53.4, ferulate

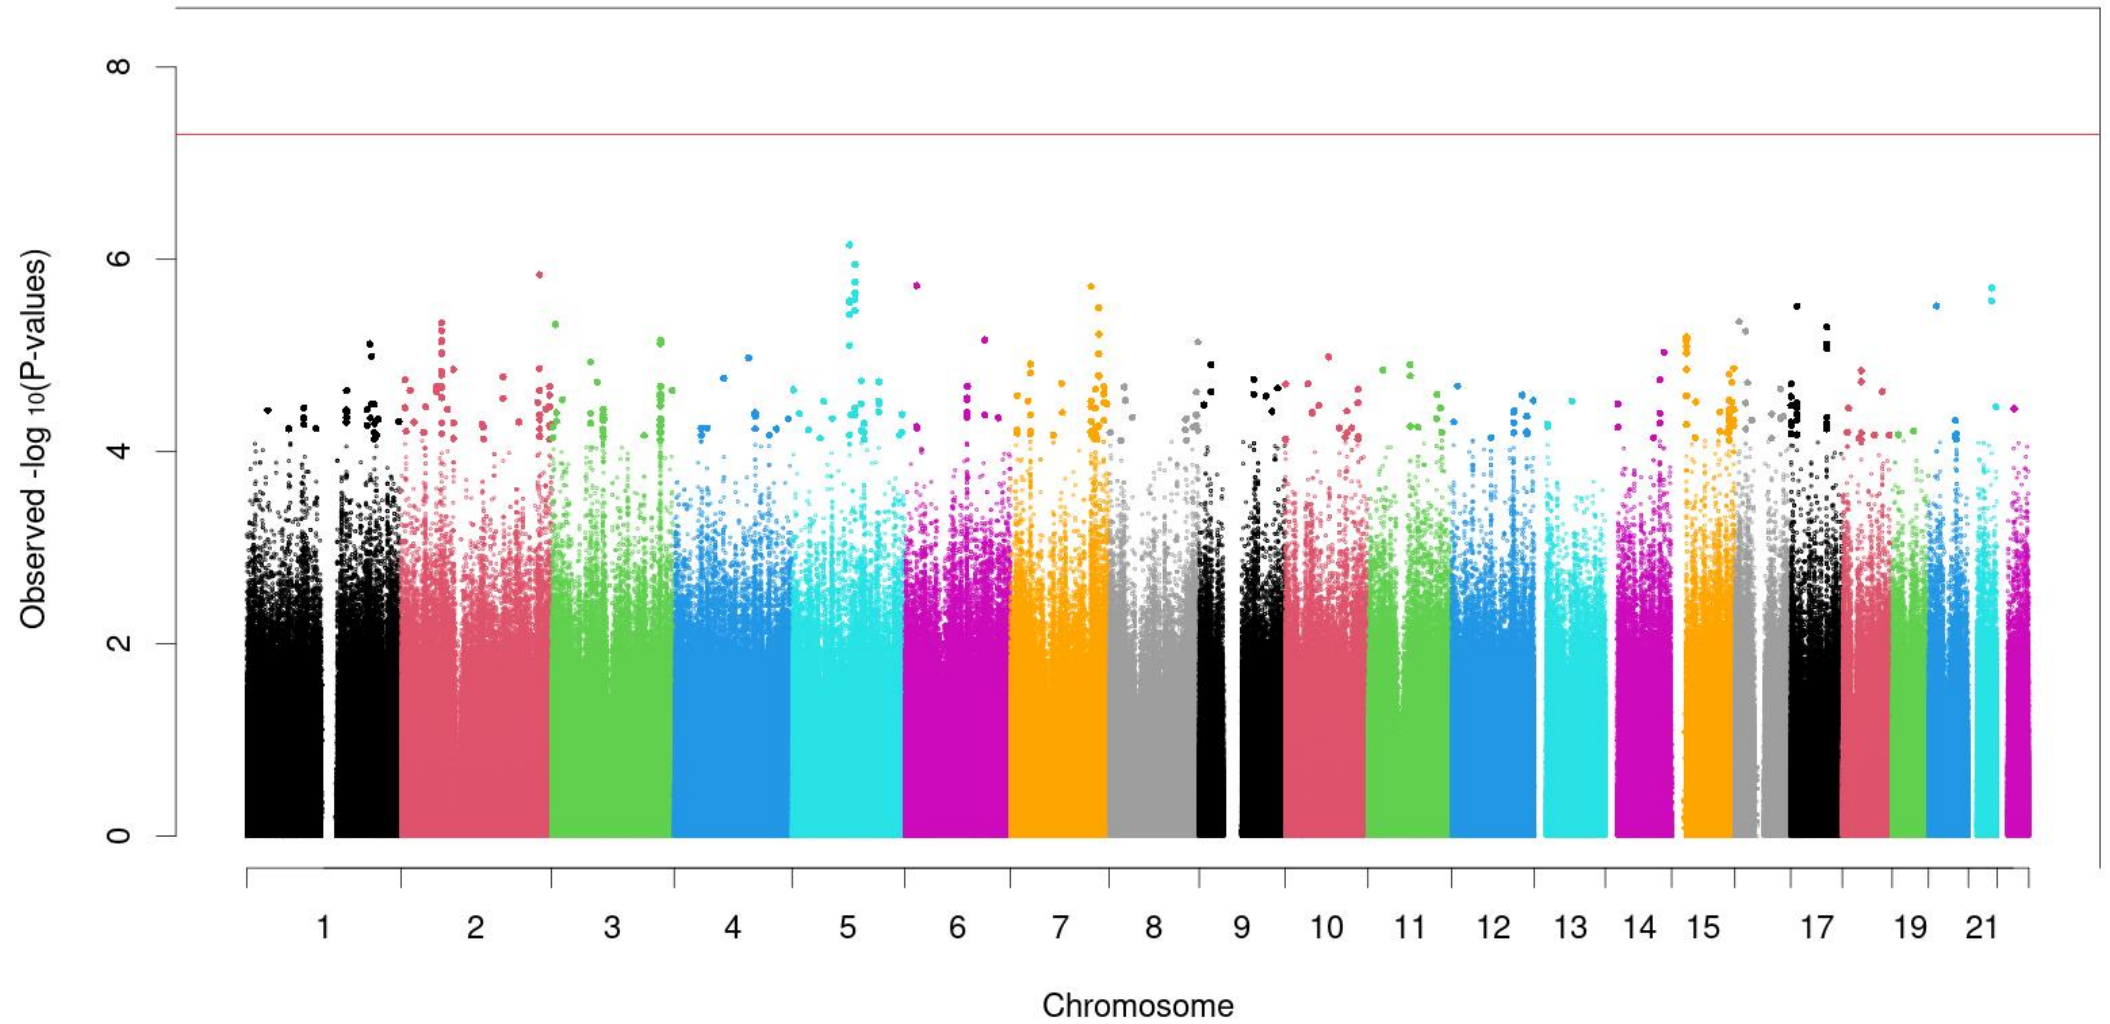



Manhattan plot for mz197.0433\_t40.7, 3-methoxy-4-hydroxymandelate

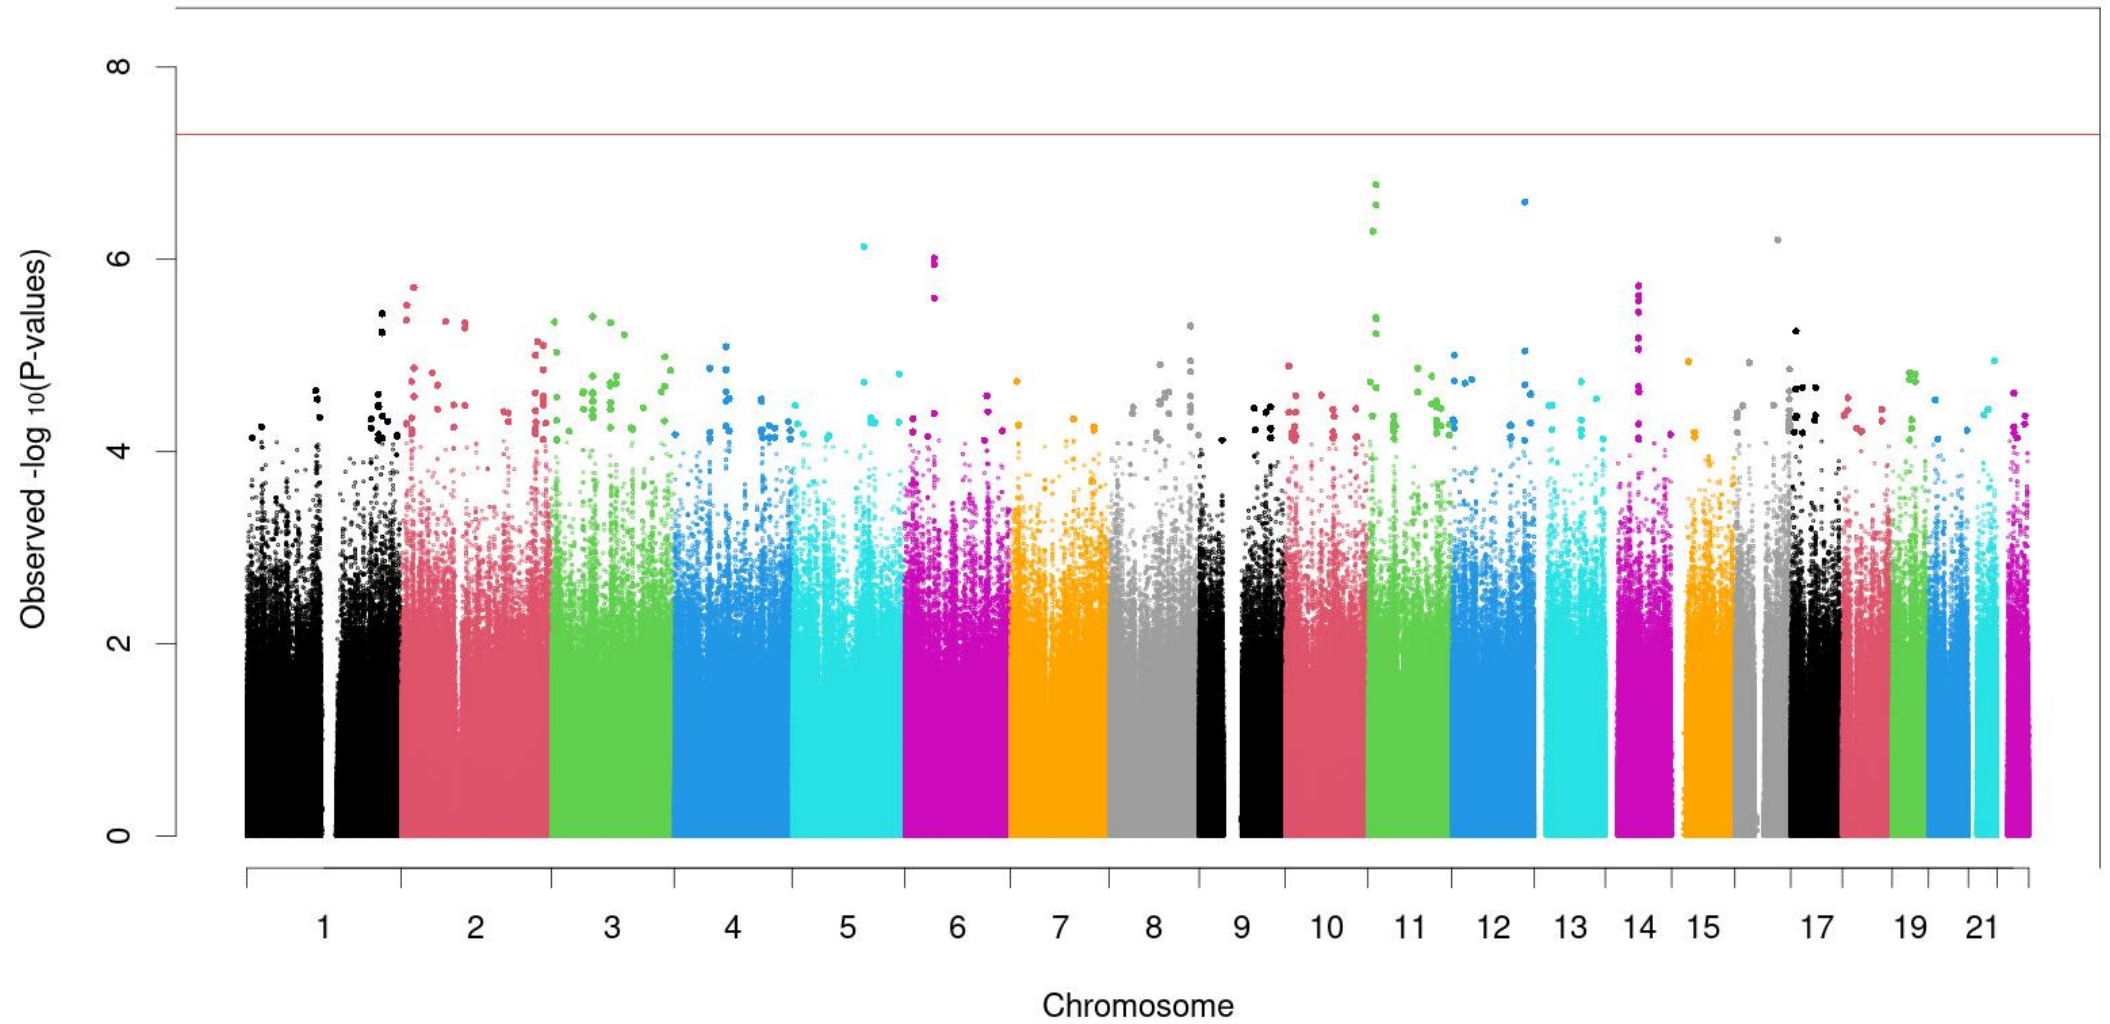

Manhattan plot for mz198.076\_t50.3, 3,4-dihydroxy-l-phenylalanine (l-dopa)

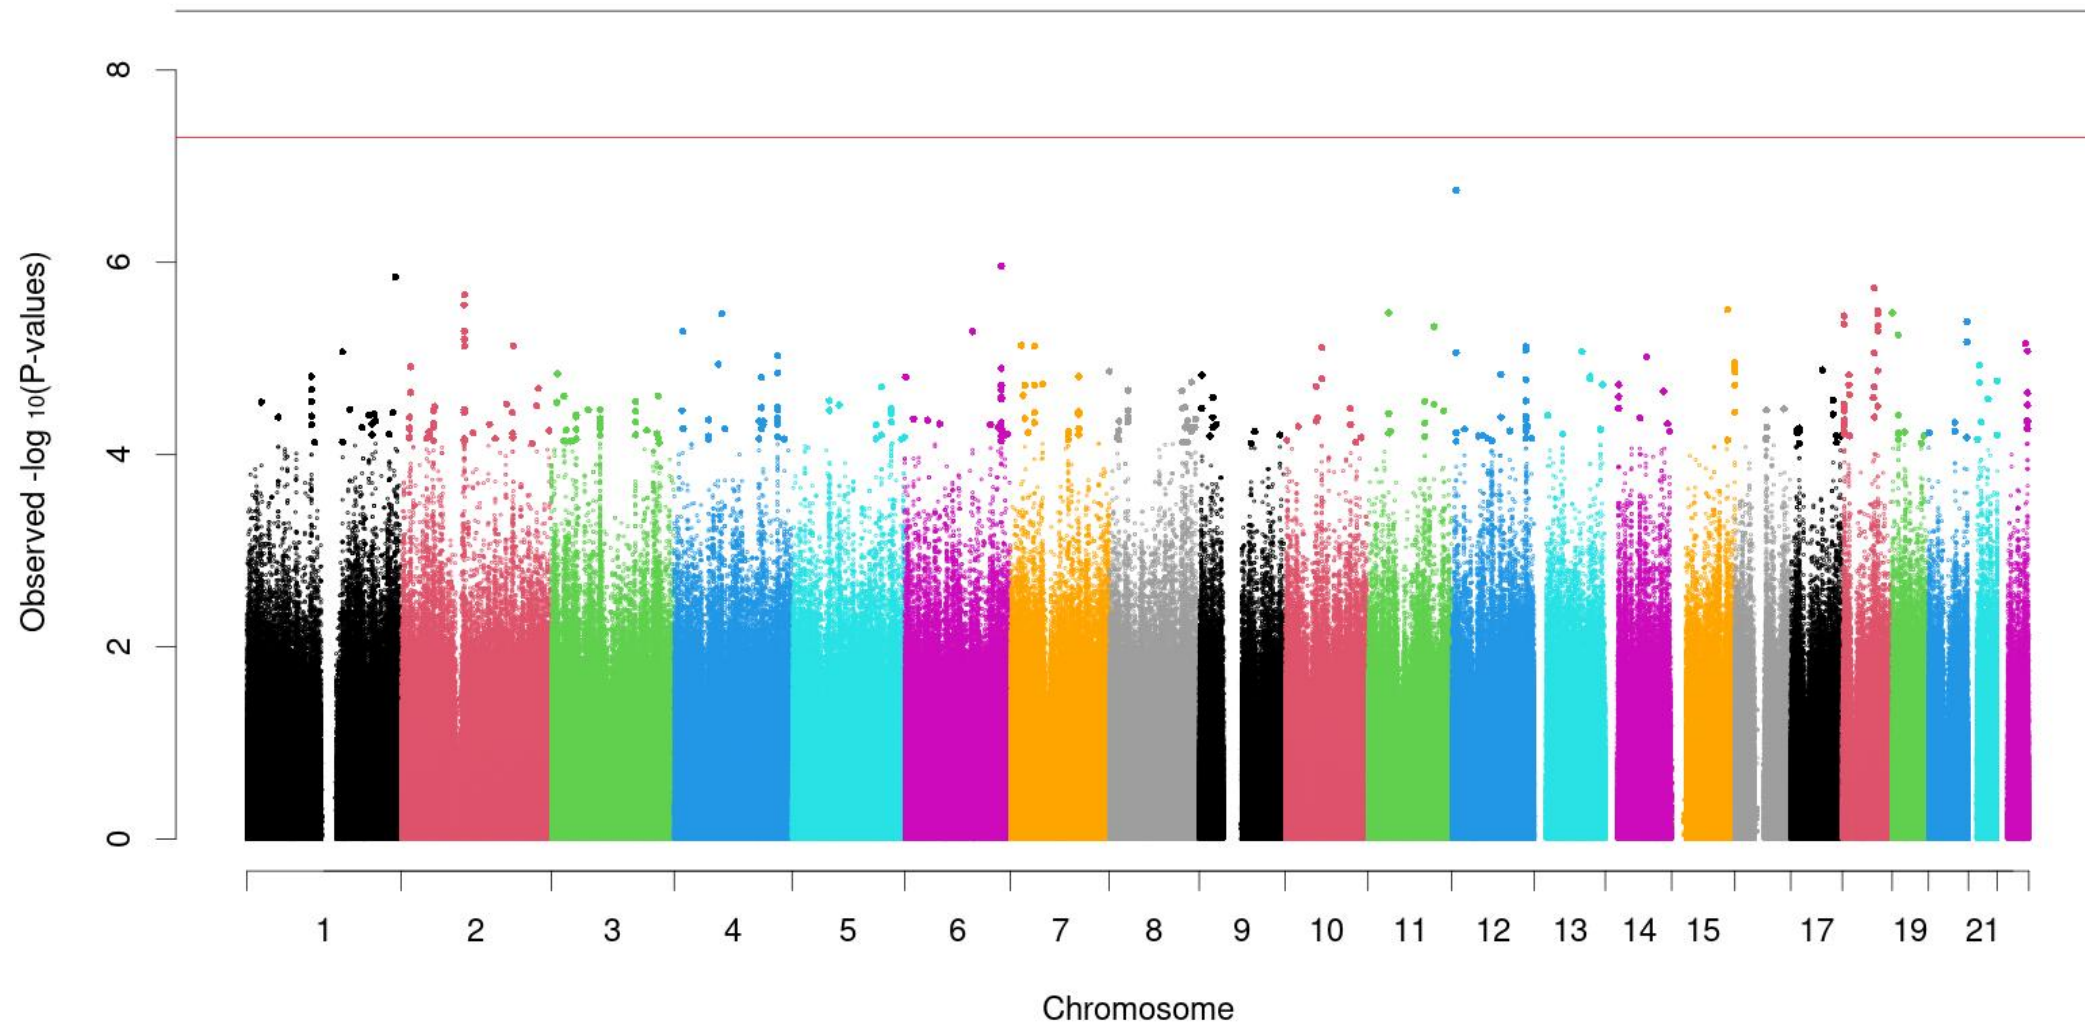

Manhattan plot for mz199.1704\_t152.3, lauric acid

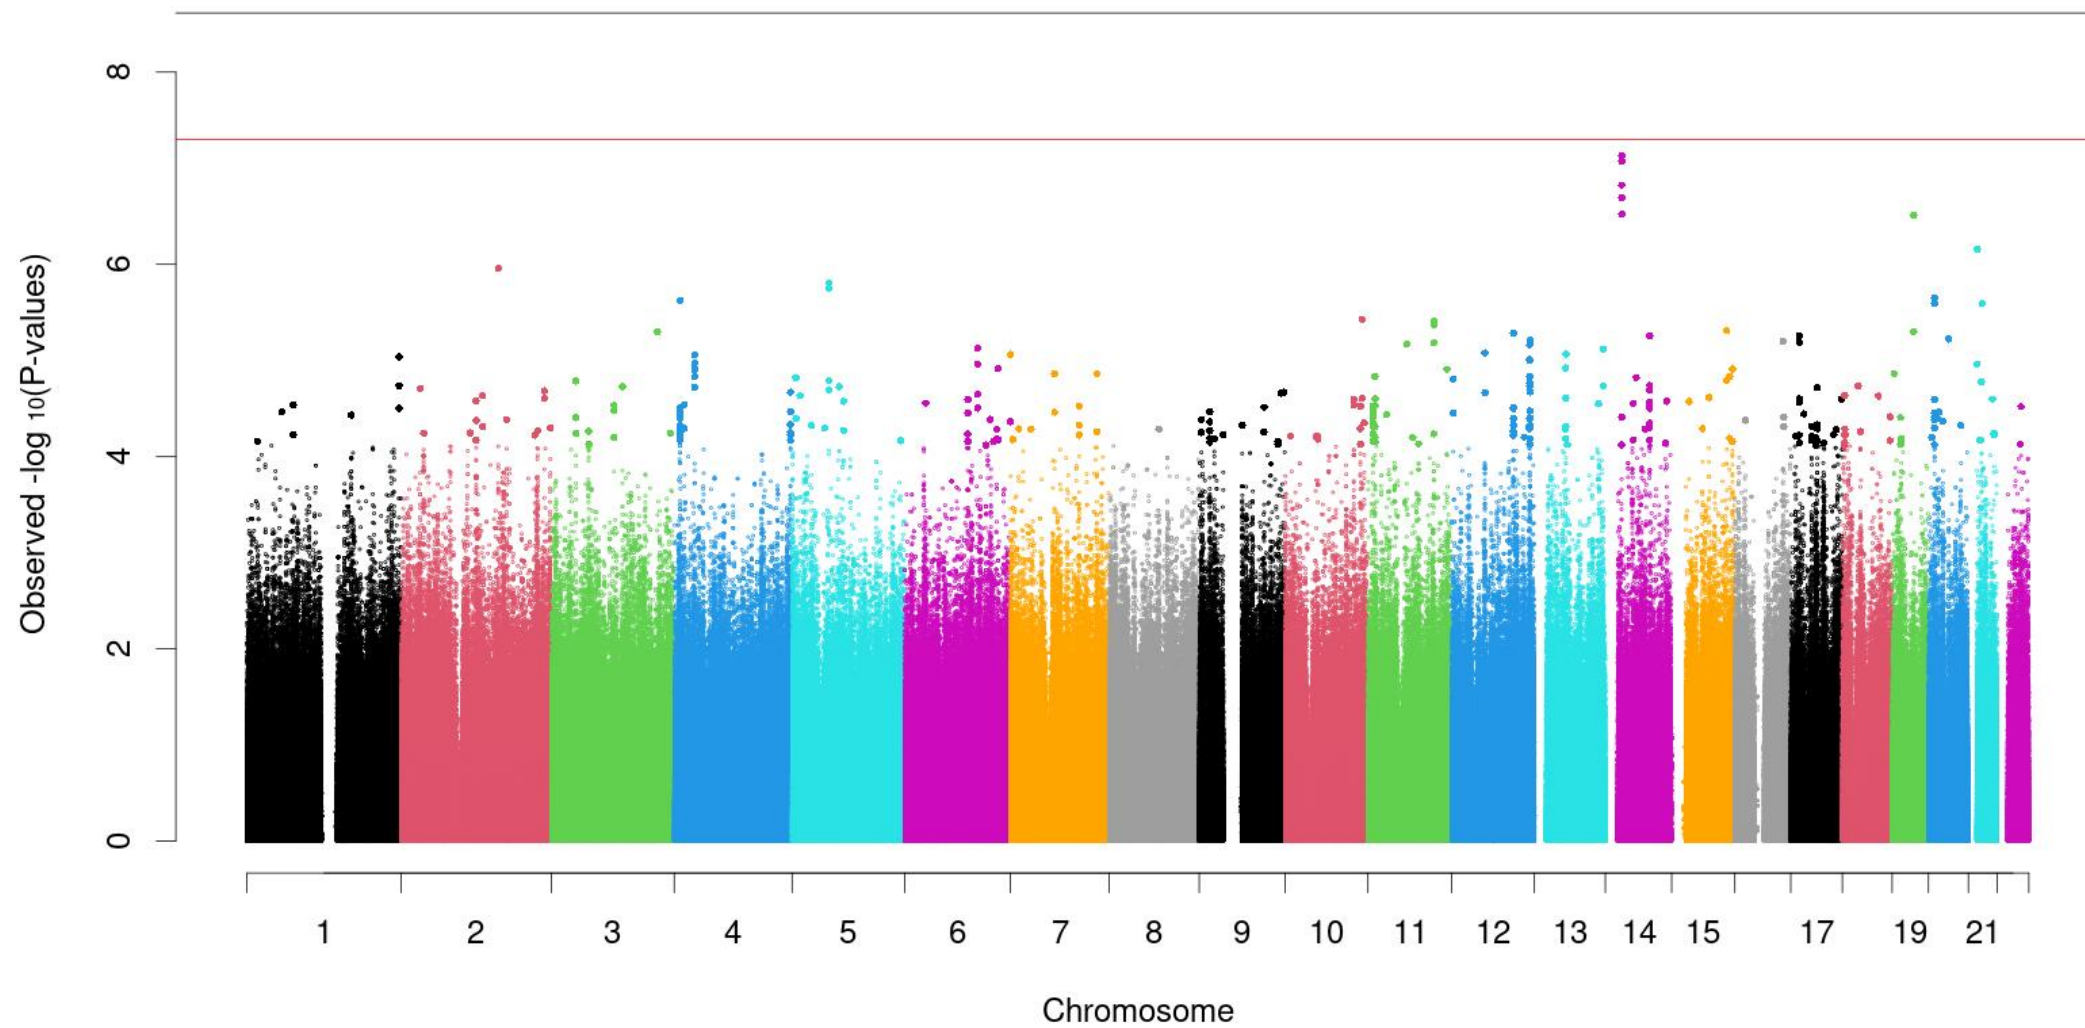



Manhattan plot for mz202.1087\_t40.9, n6-(delta2-isopentenyl)-adenine

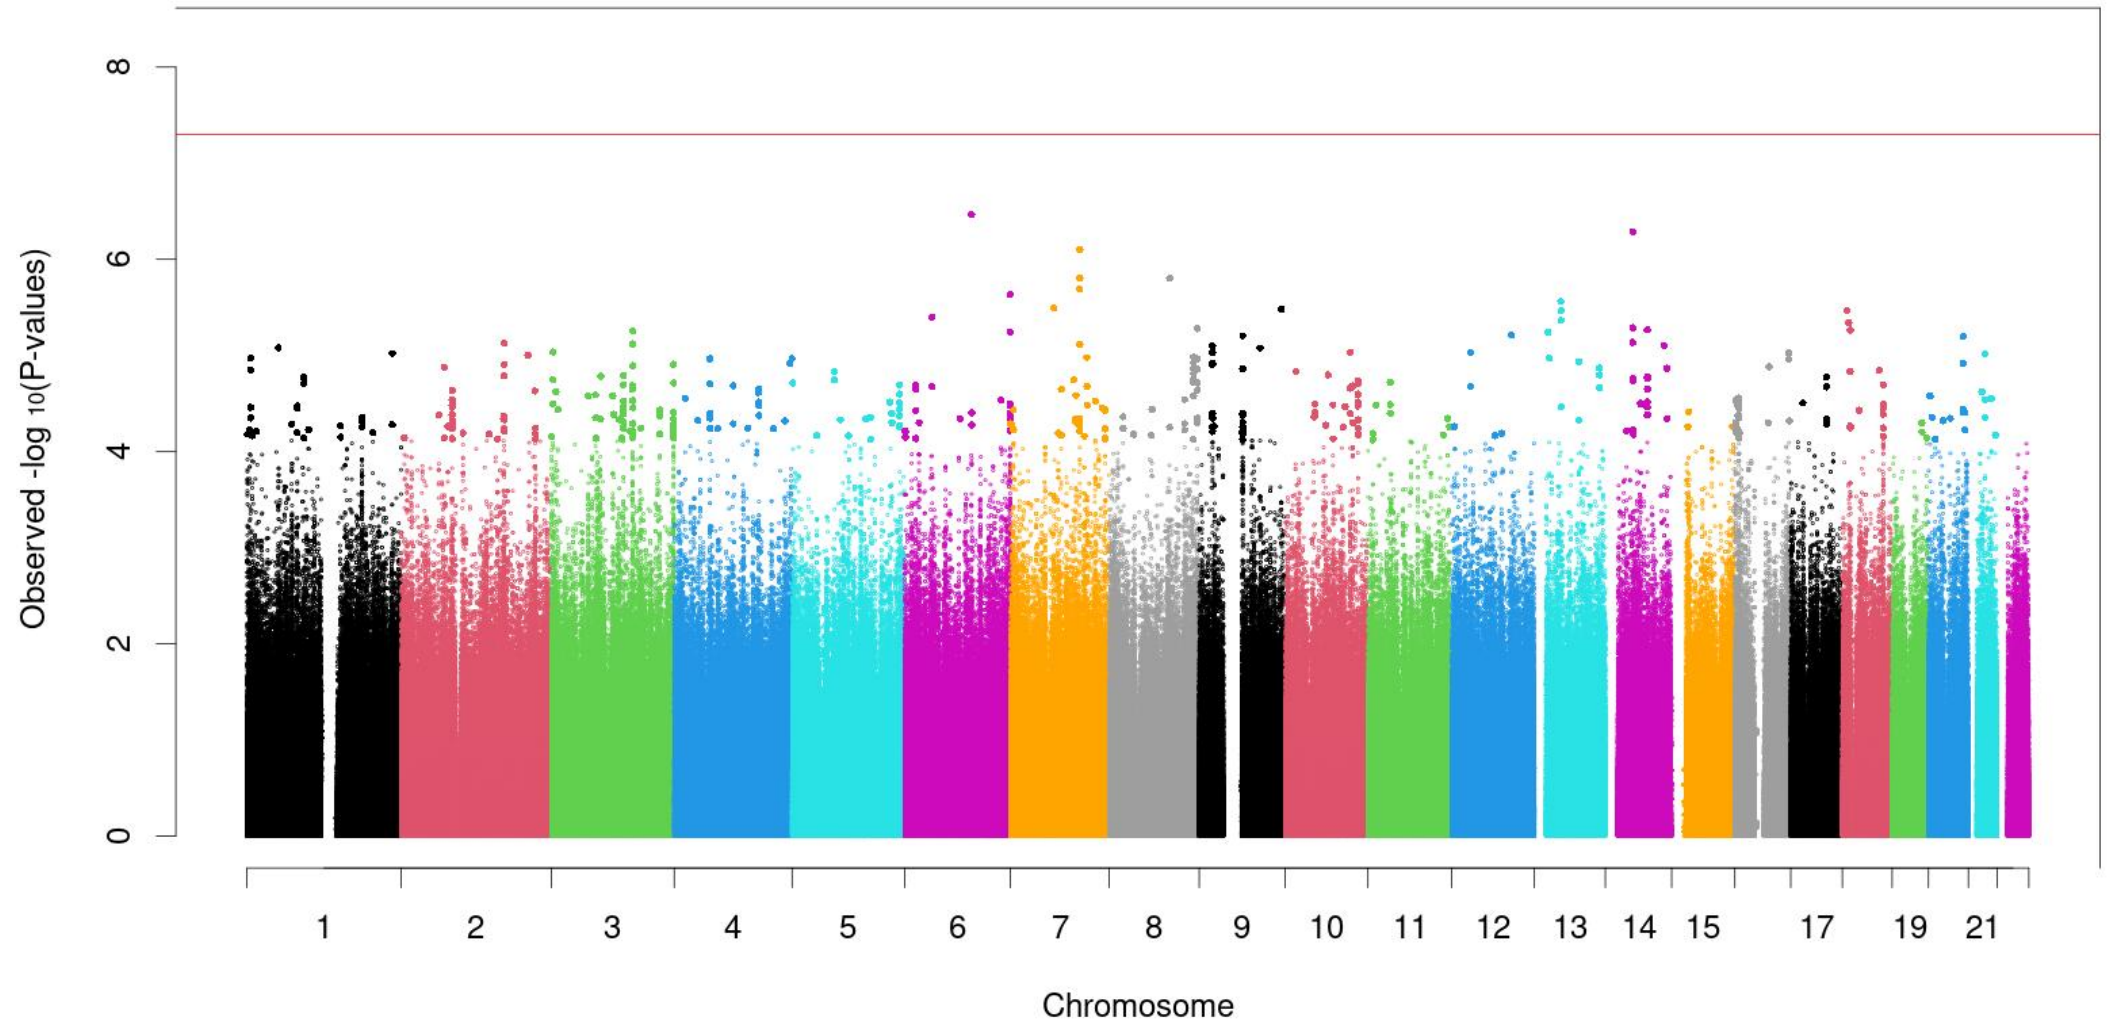

Manhattan plot for mz204.123\_t63.1, o-acetyl-l-carnitine

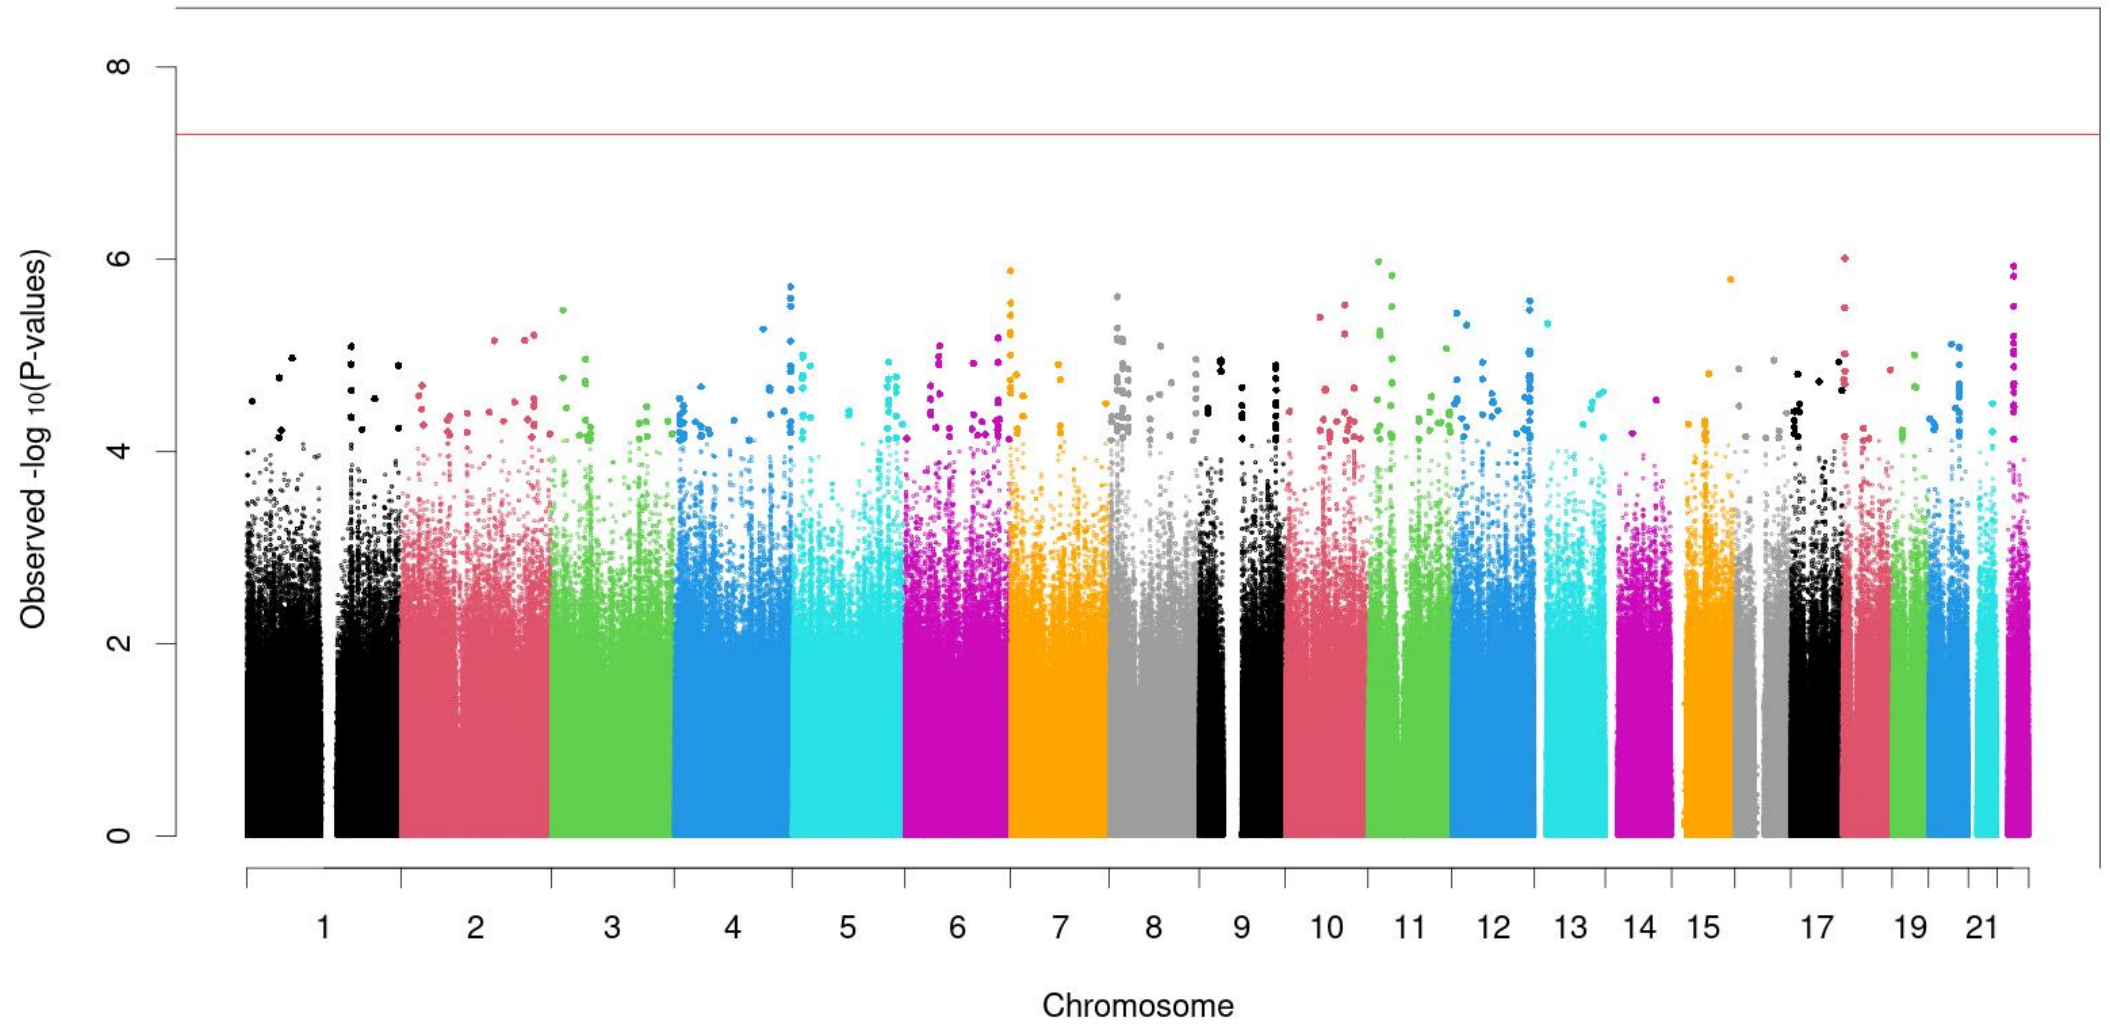

Manhattan plot for mz205.0972\_t45.9, tryptophan

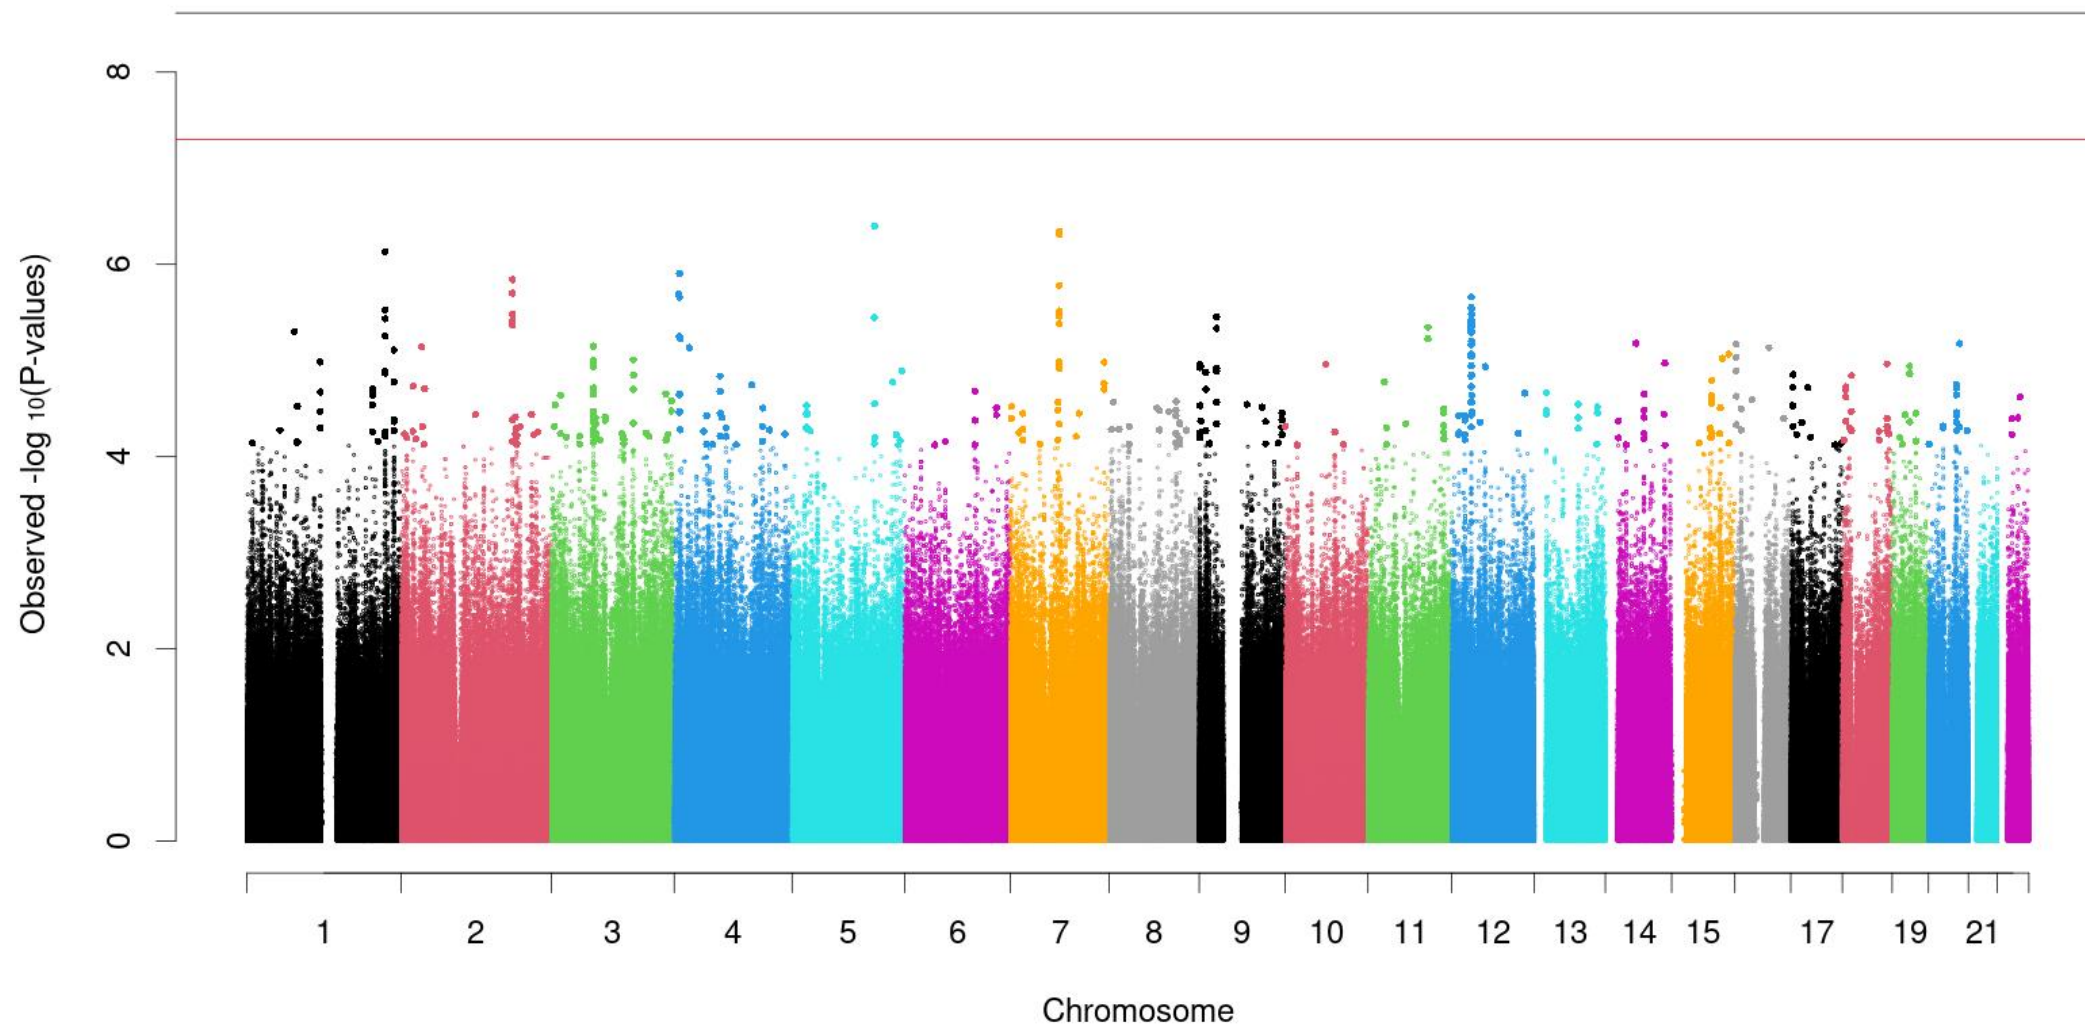



Manhattan plot for mz206.0825\_t46.2, n-acetyl-L-phenylalanine

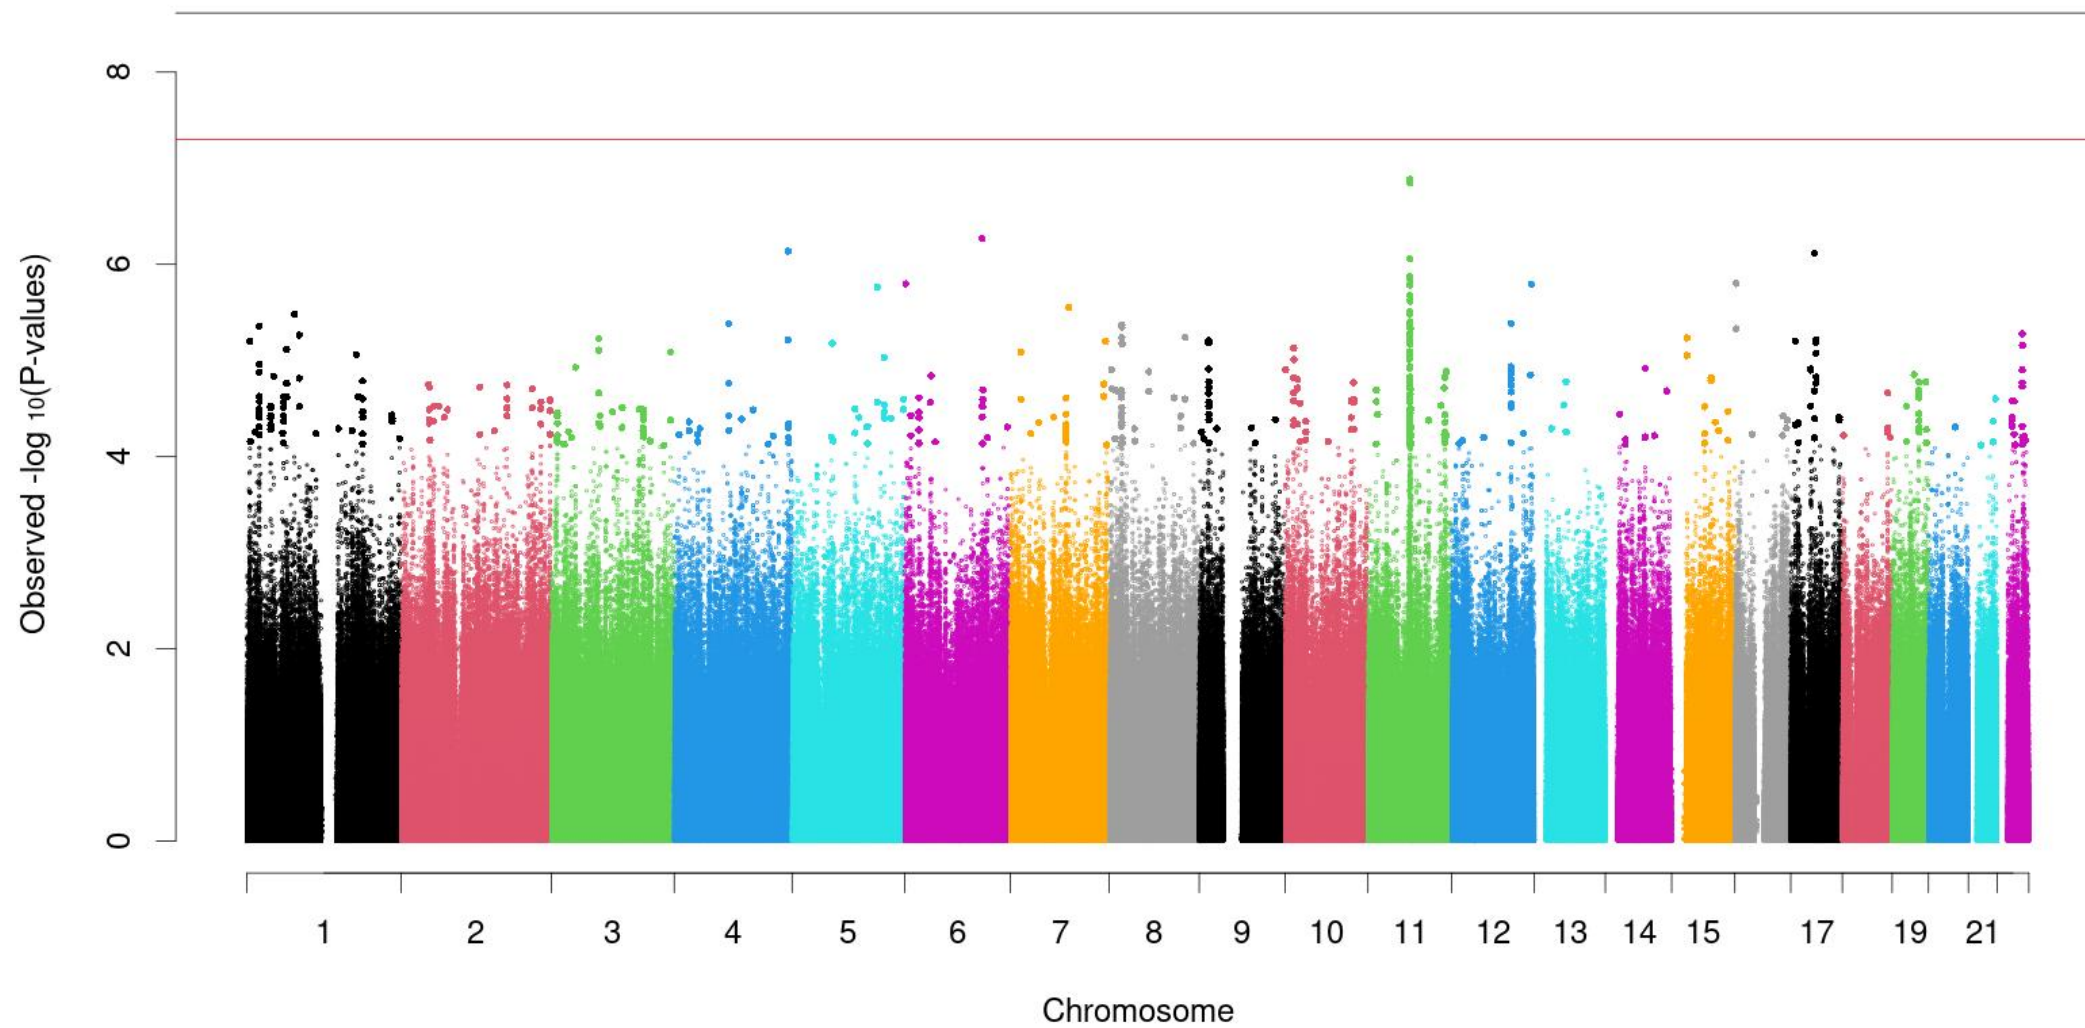

Manhattan plot for mz209.0308\_t34.2, d-saccharic acid

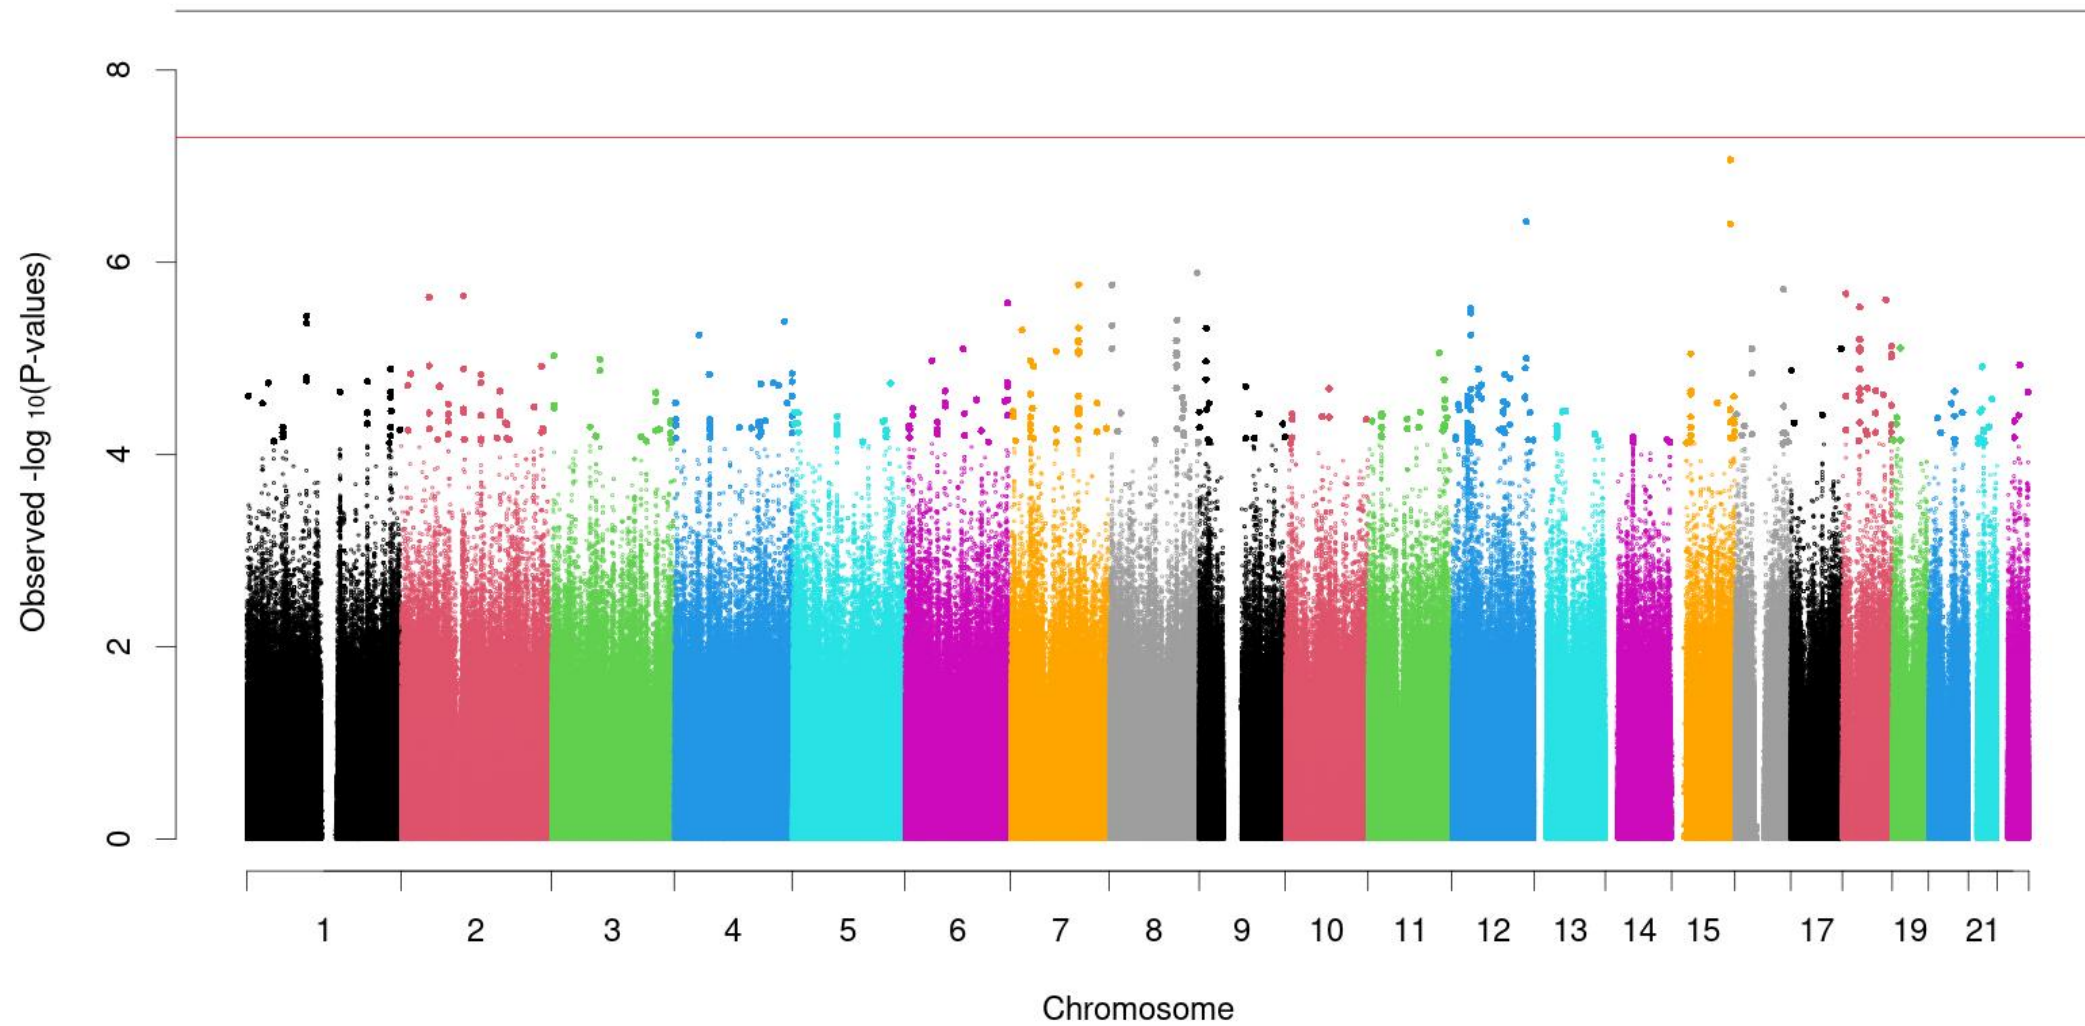

Manhattan plot for mz209.0921\_t47.2, kynurenine

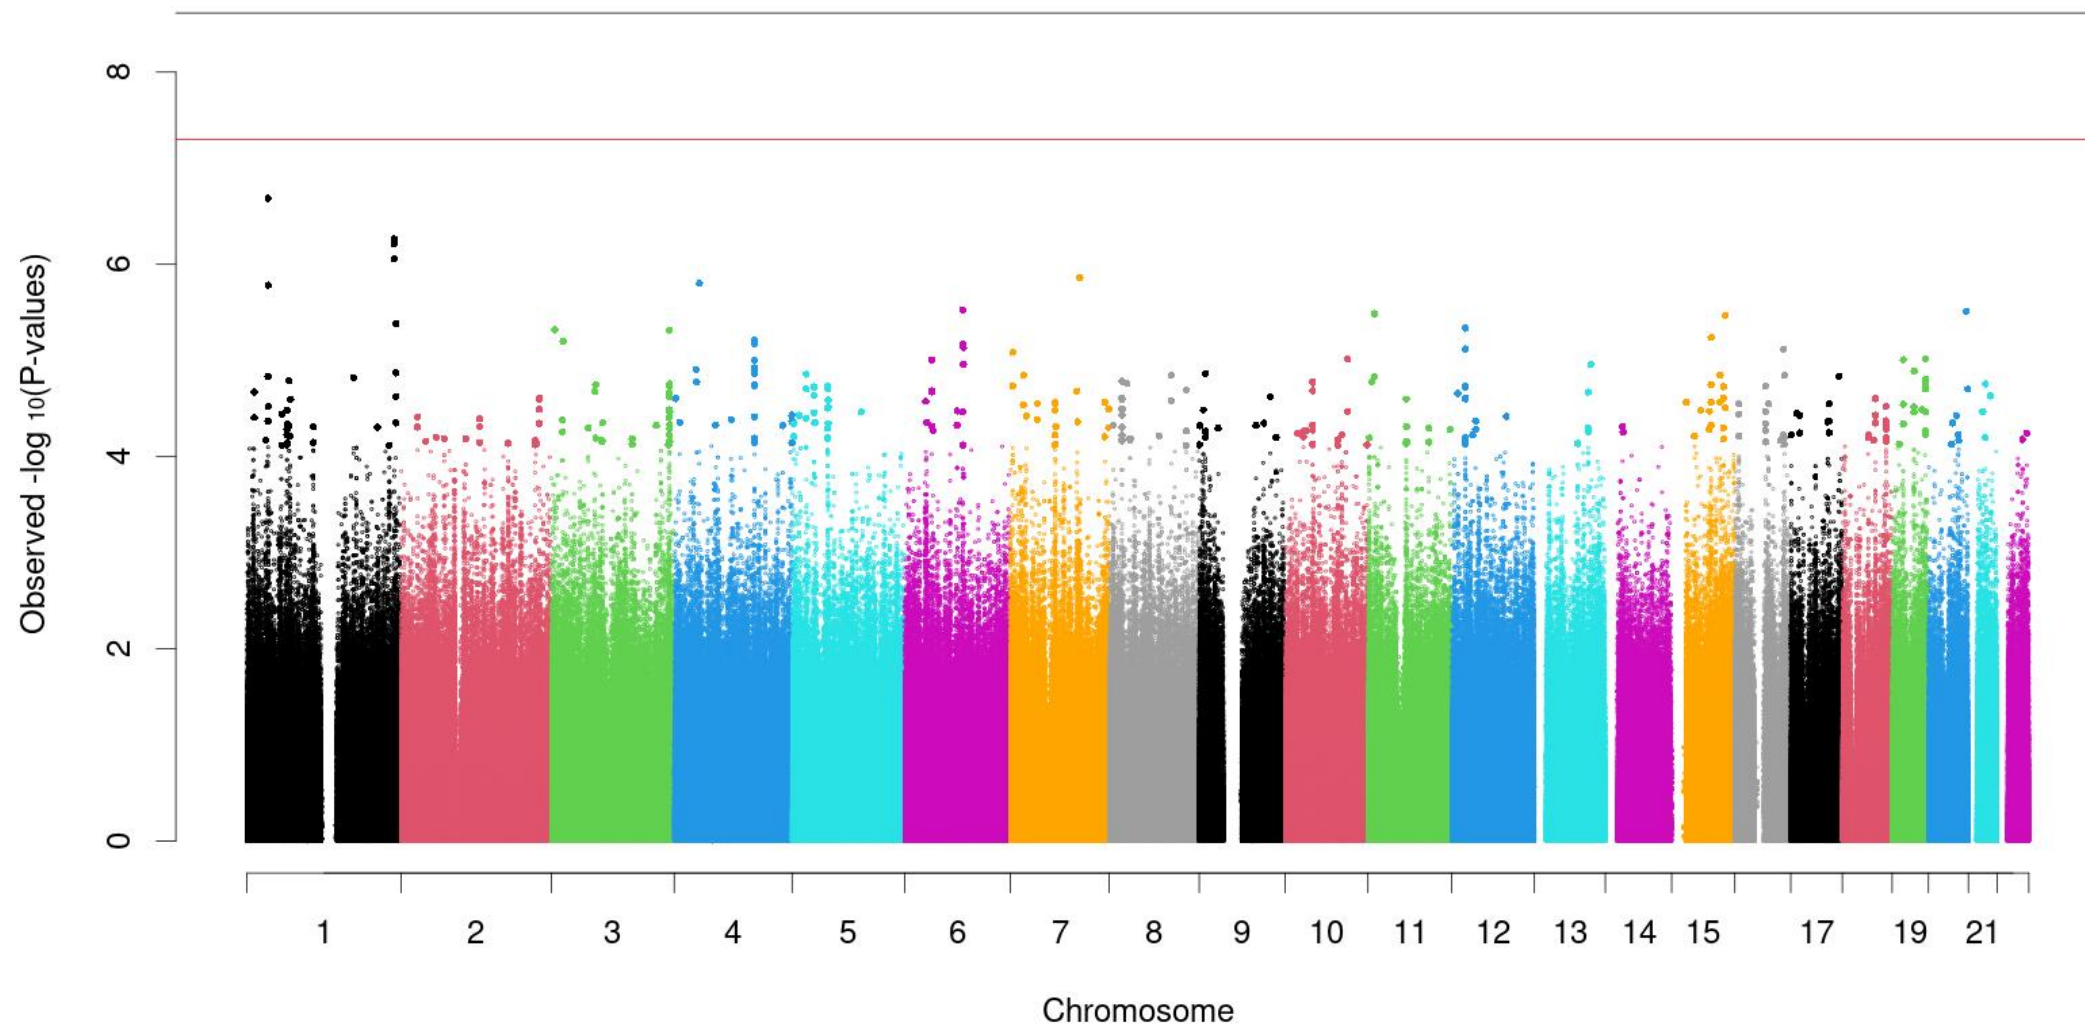



Manhattan plot for mz212.0433\_t126.8, phosphocreatine

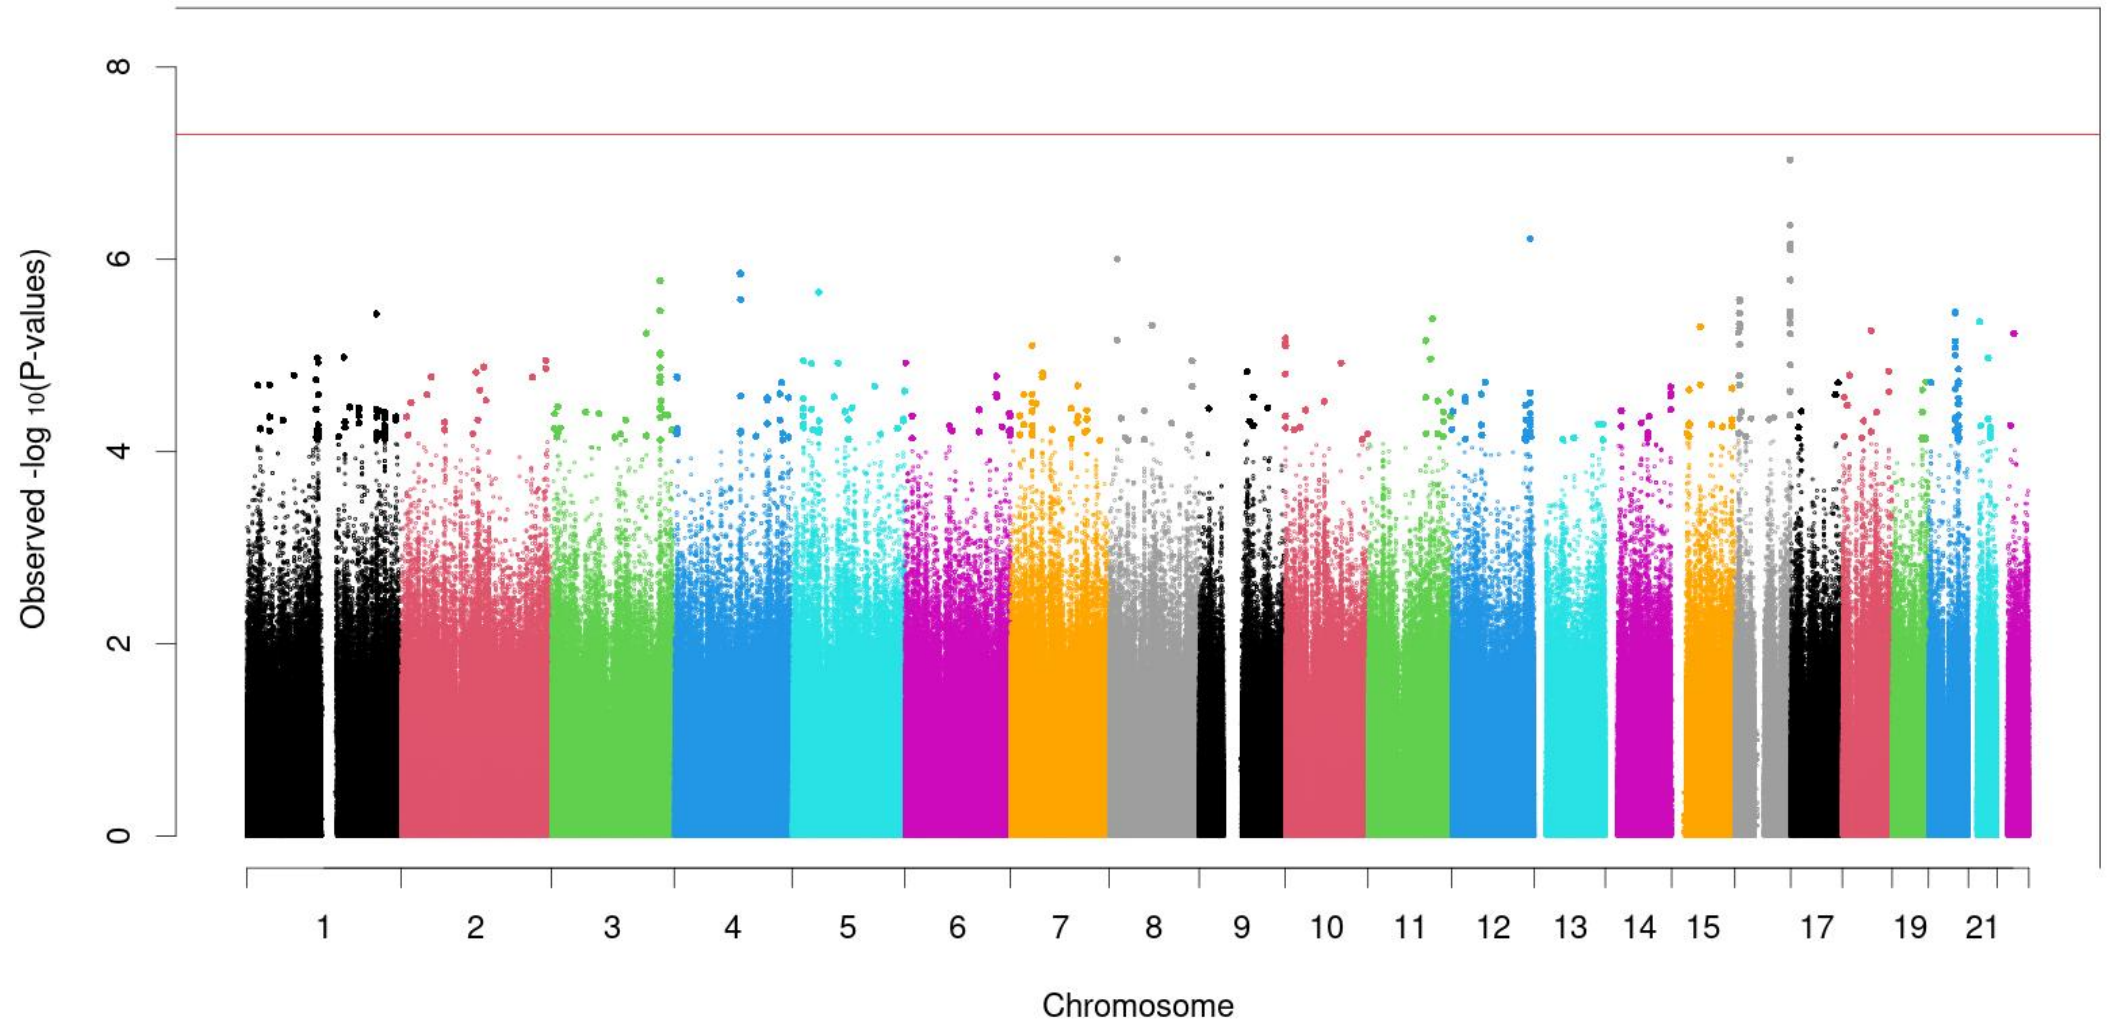

Manhattan plot for mz218.1037\_t23.6, d-pantothenic acid

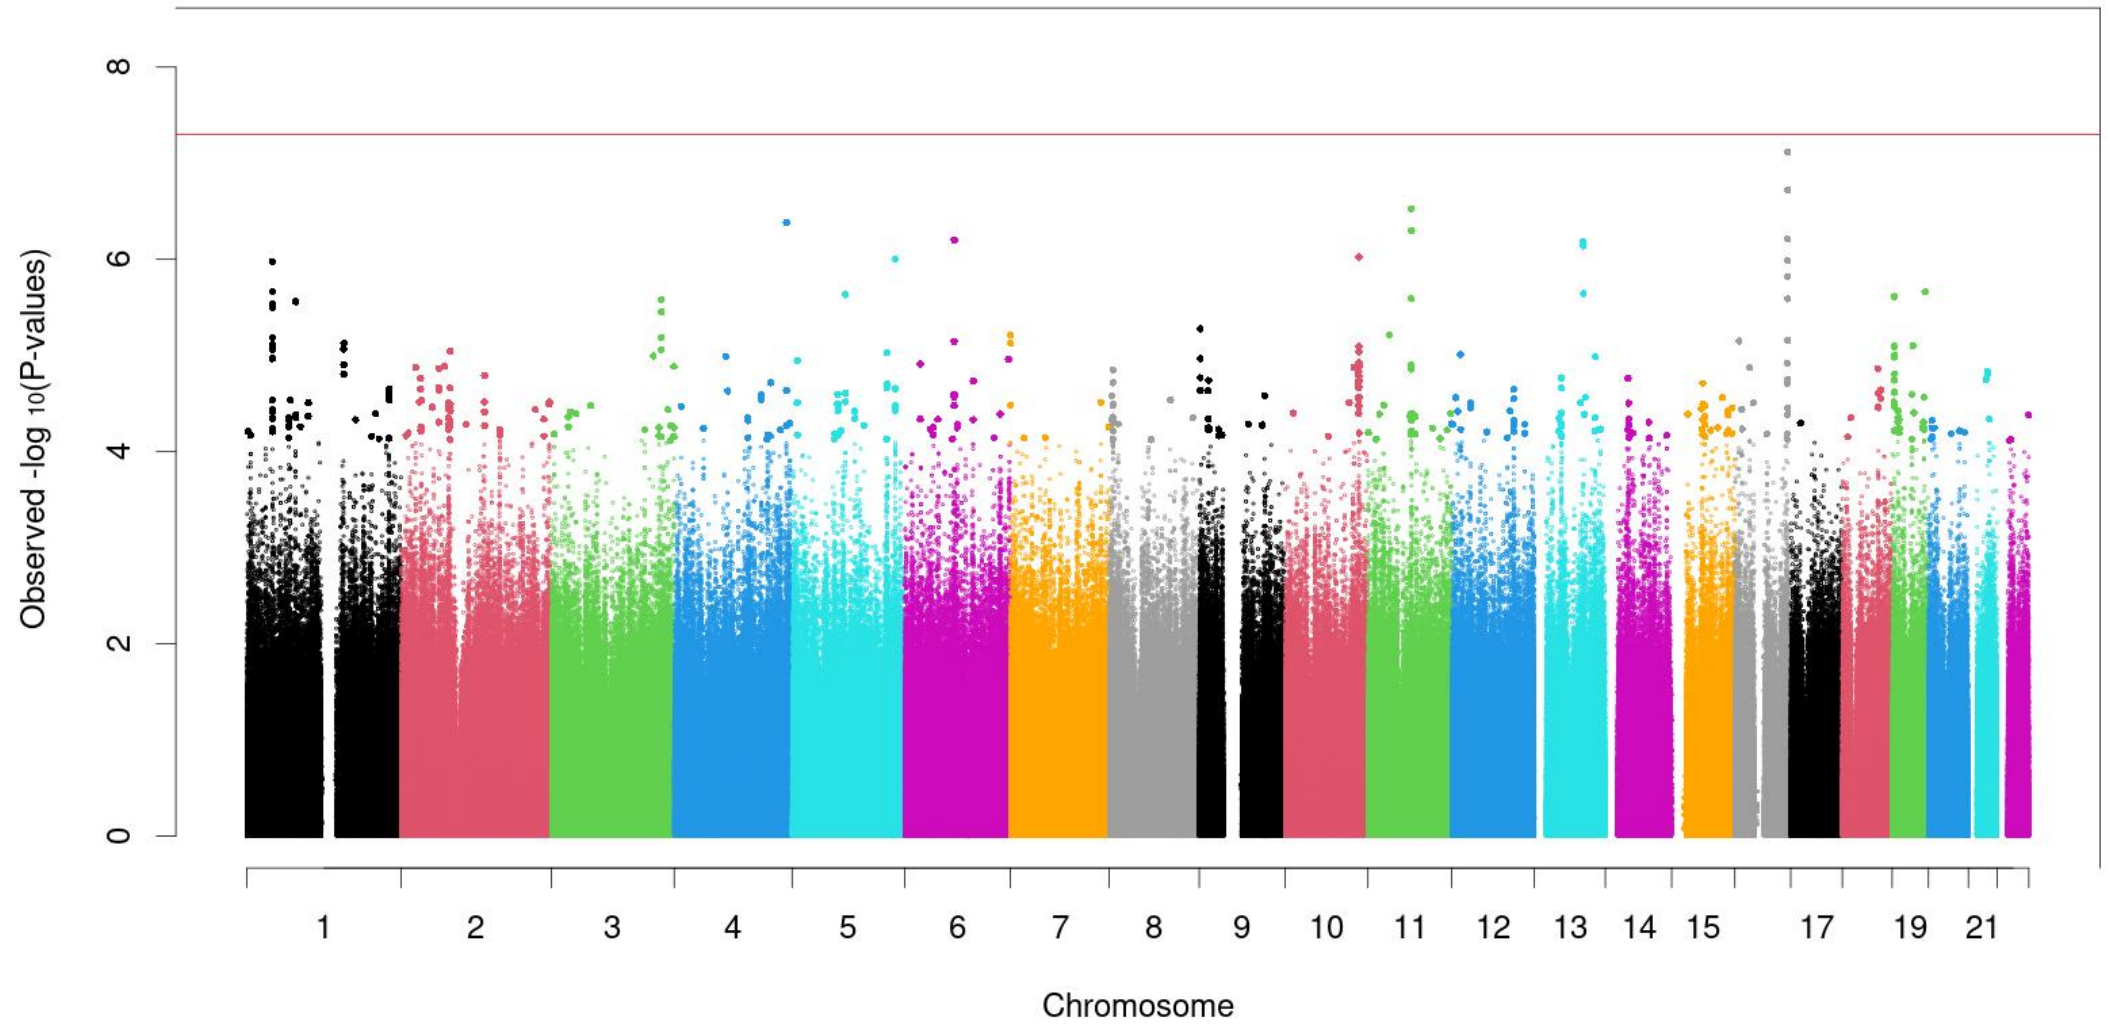

Manhattan plot for mz220.1182\_t64.5, d-pantothenic acid

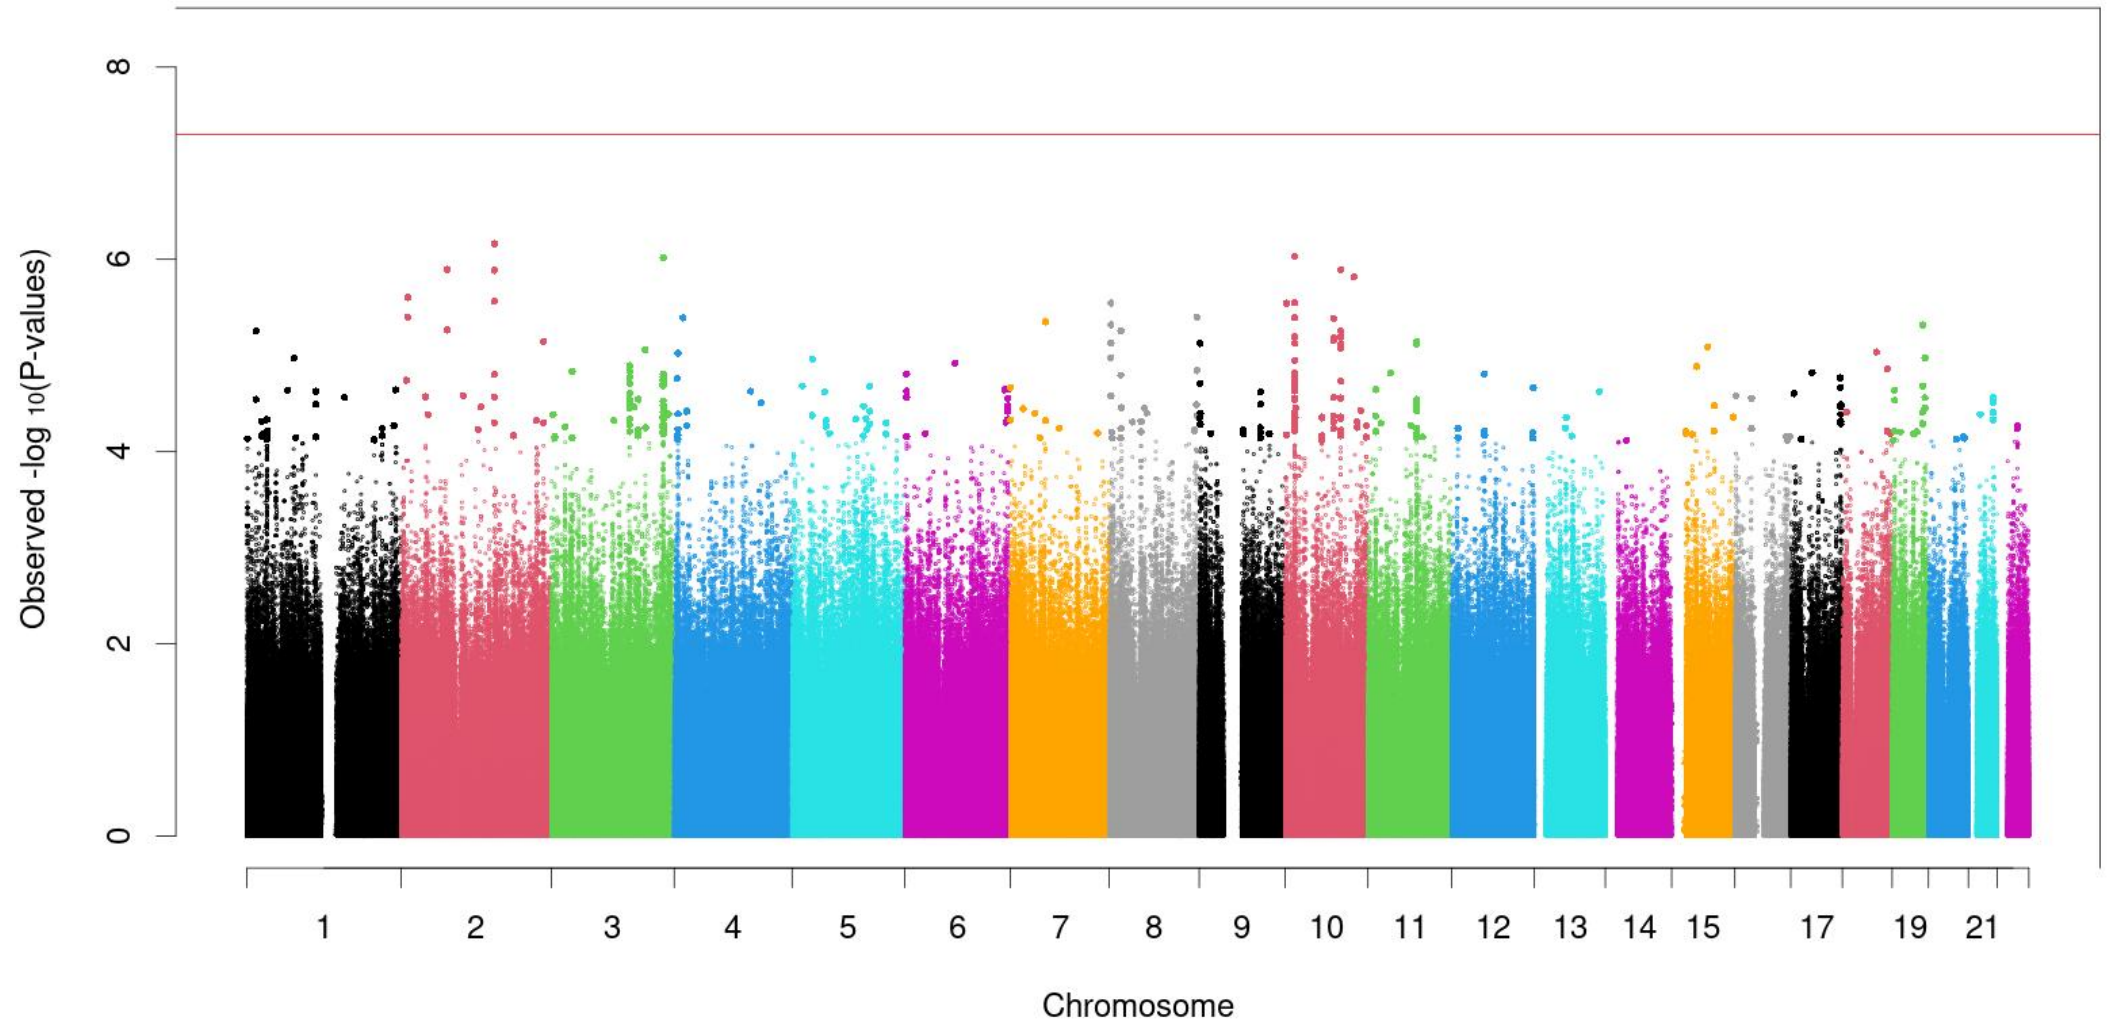



Manhattan plot for mz221.092\_t44.8, 5-hydroxy-l-tryptophan

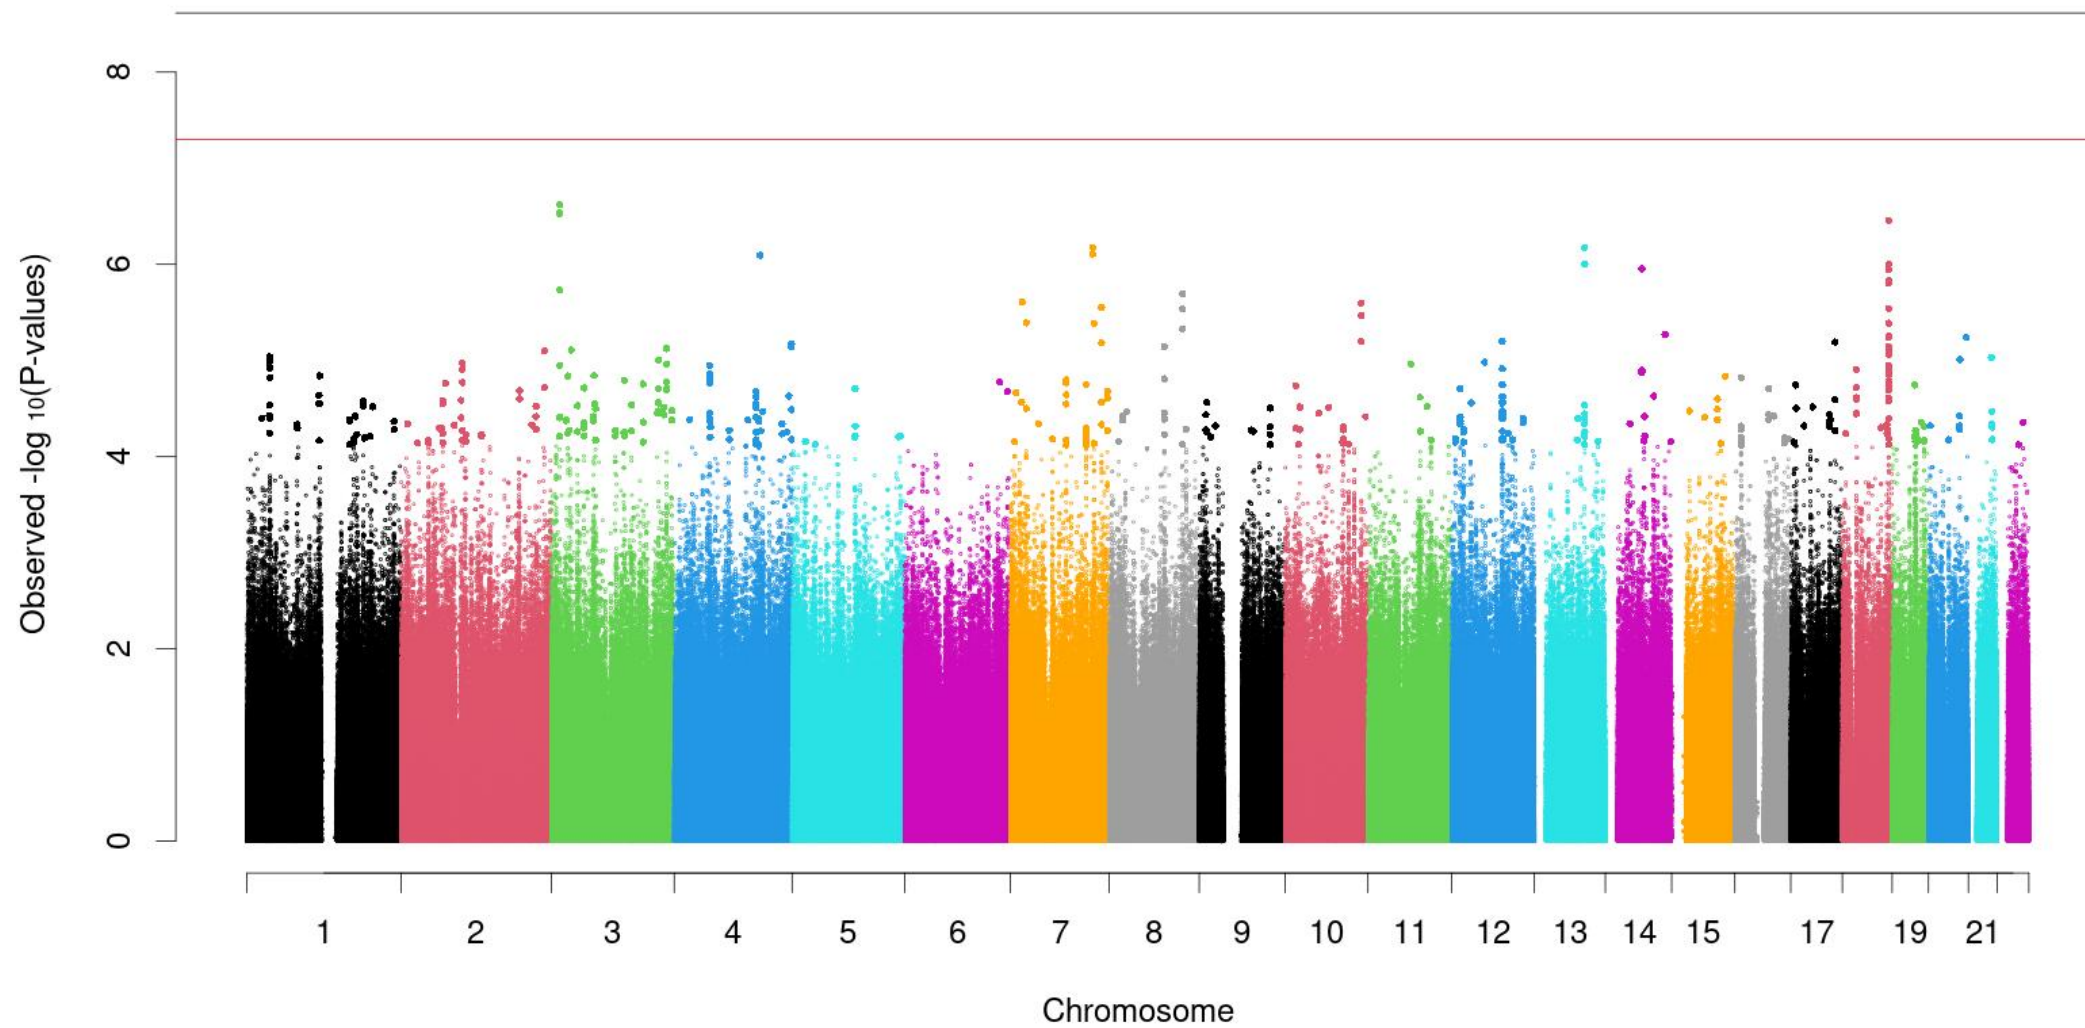

Manhattan plot for mz222.0962\_t43.6, n-acetyl-d-glucosamine

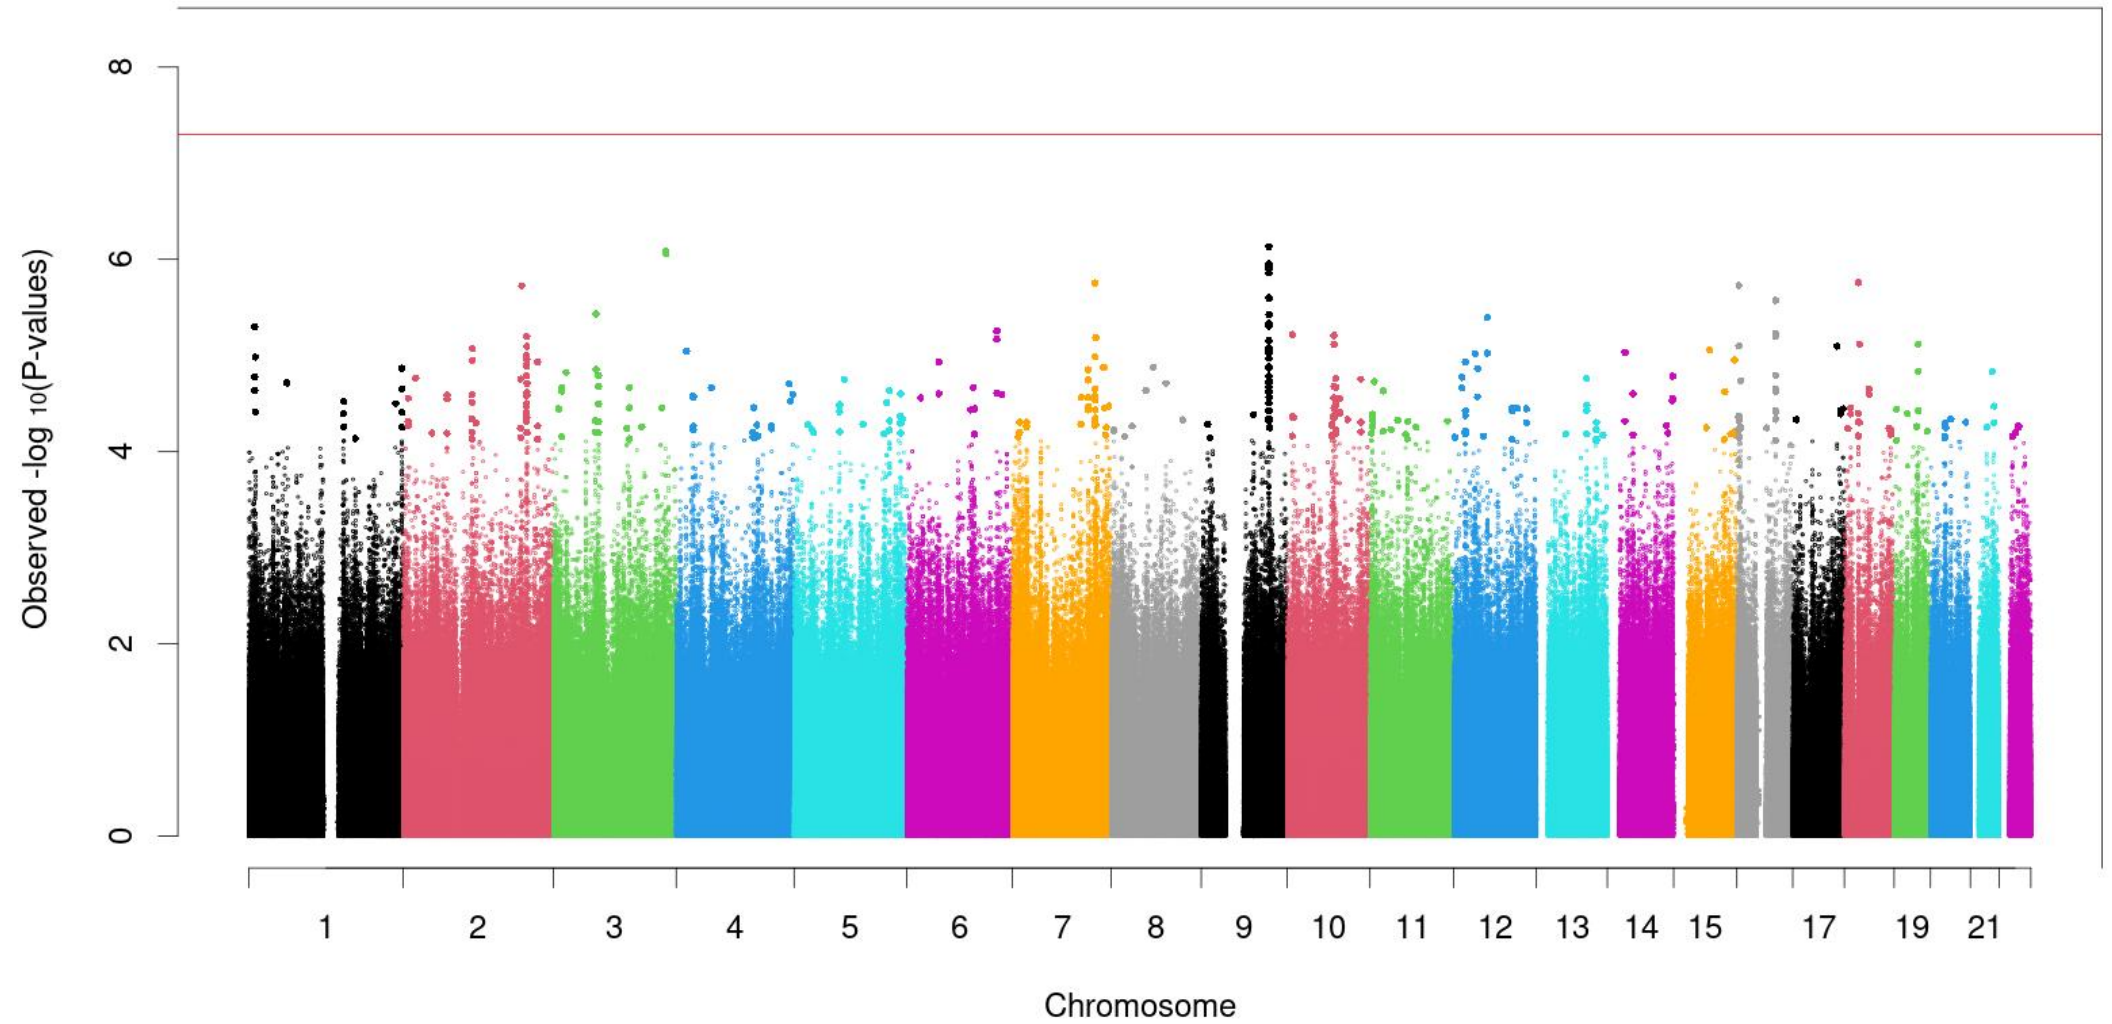

Manhattan plot for mz225.1484\_t26.7, methyl jasmonate

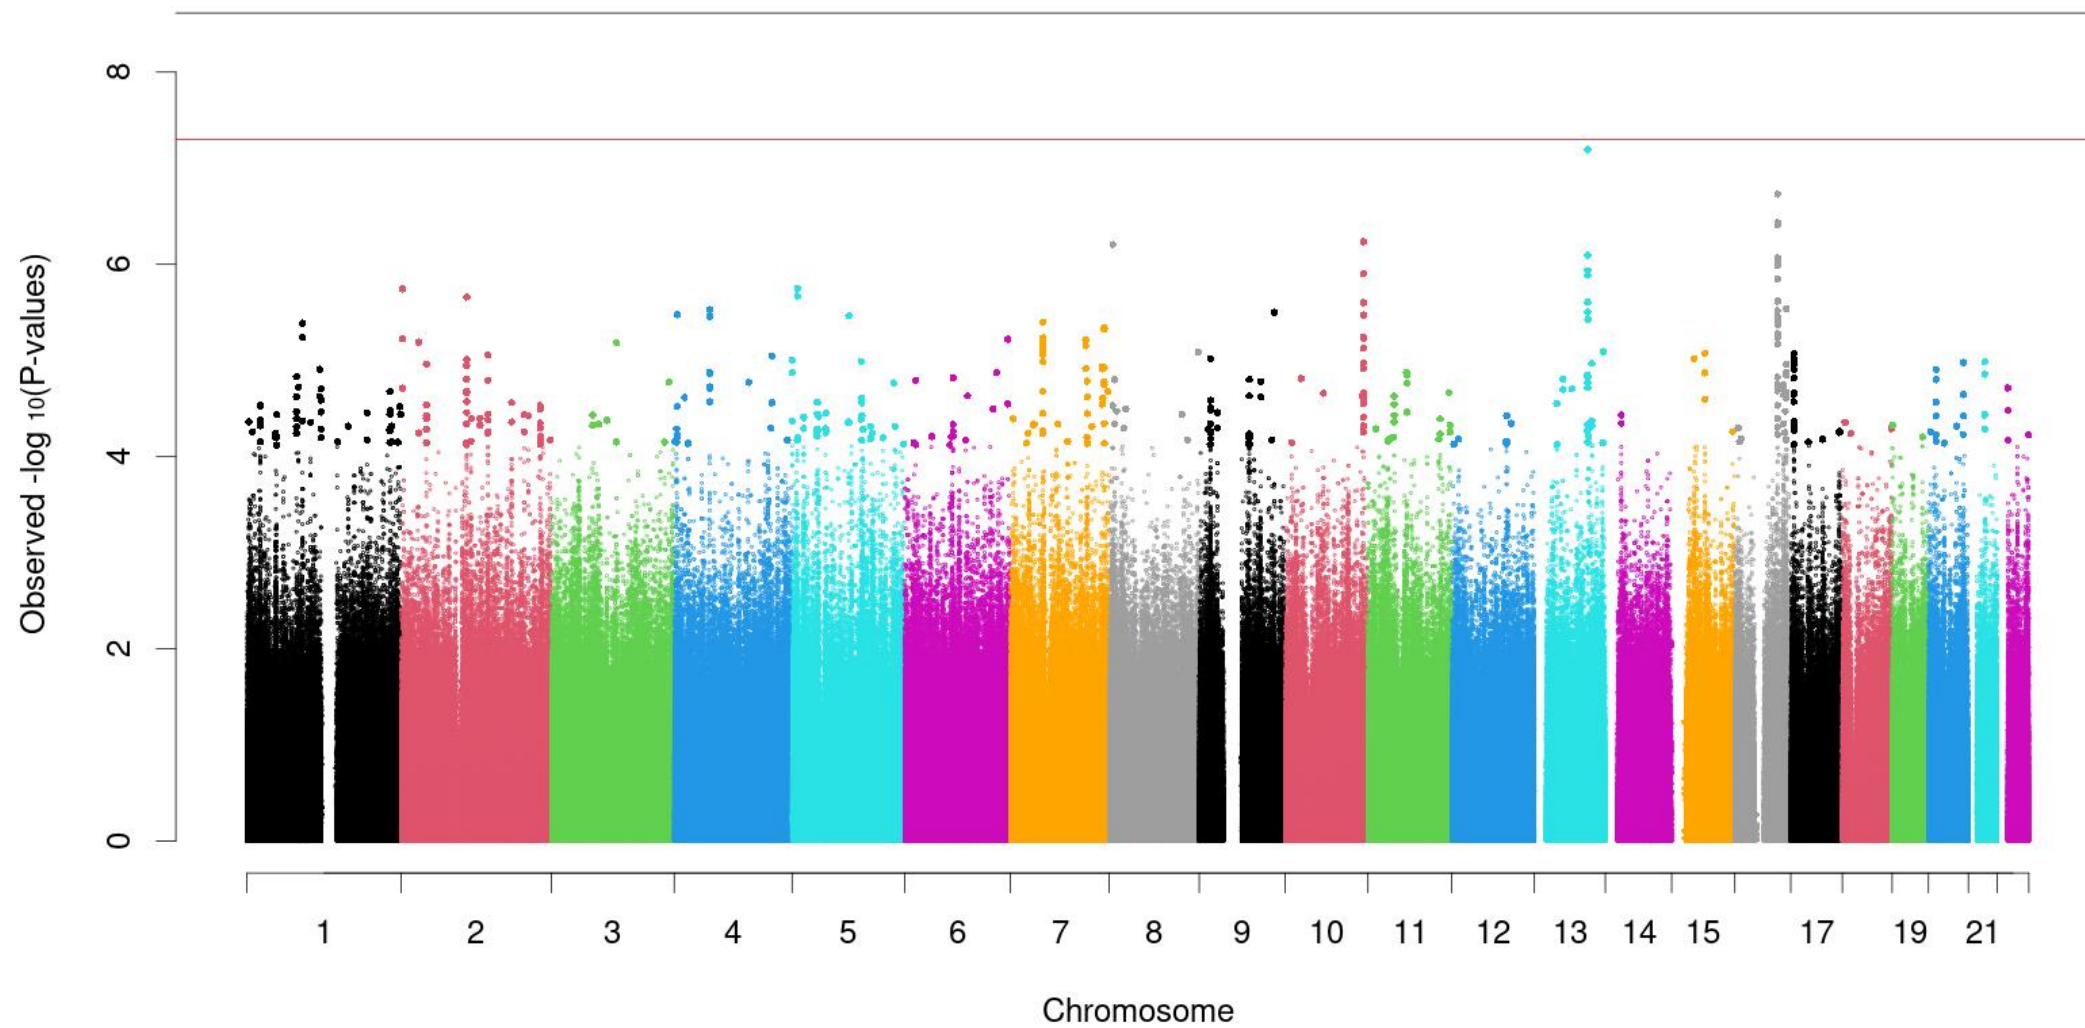



Manhattan plot for mz237.0362\_t73.2, quinate

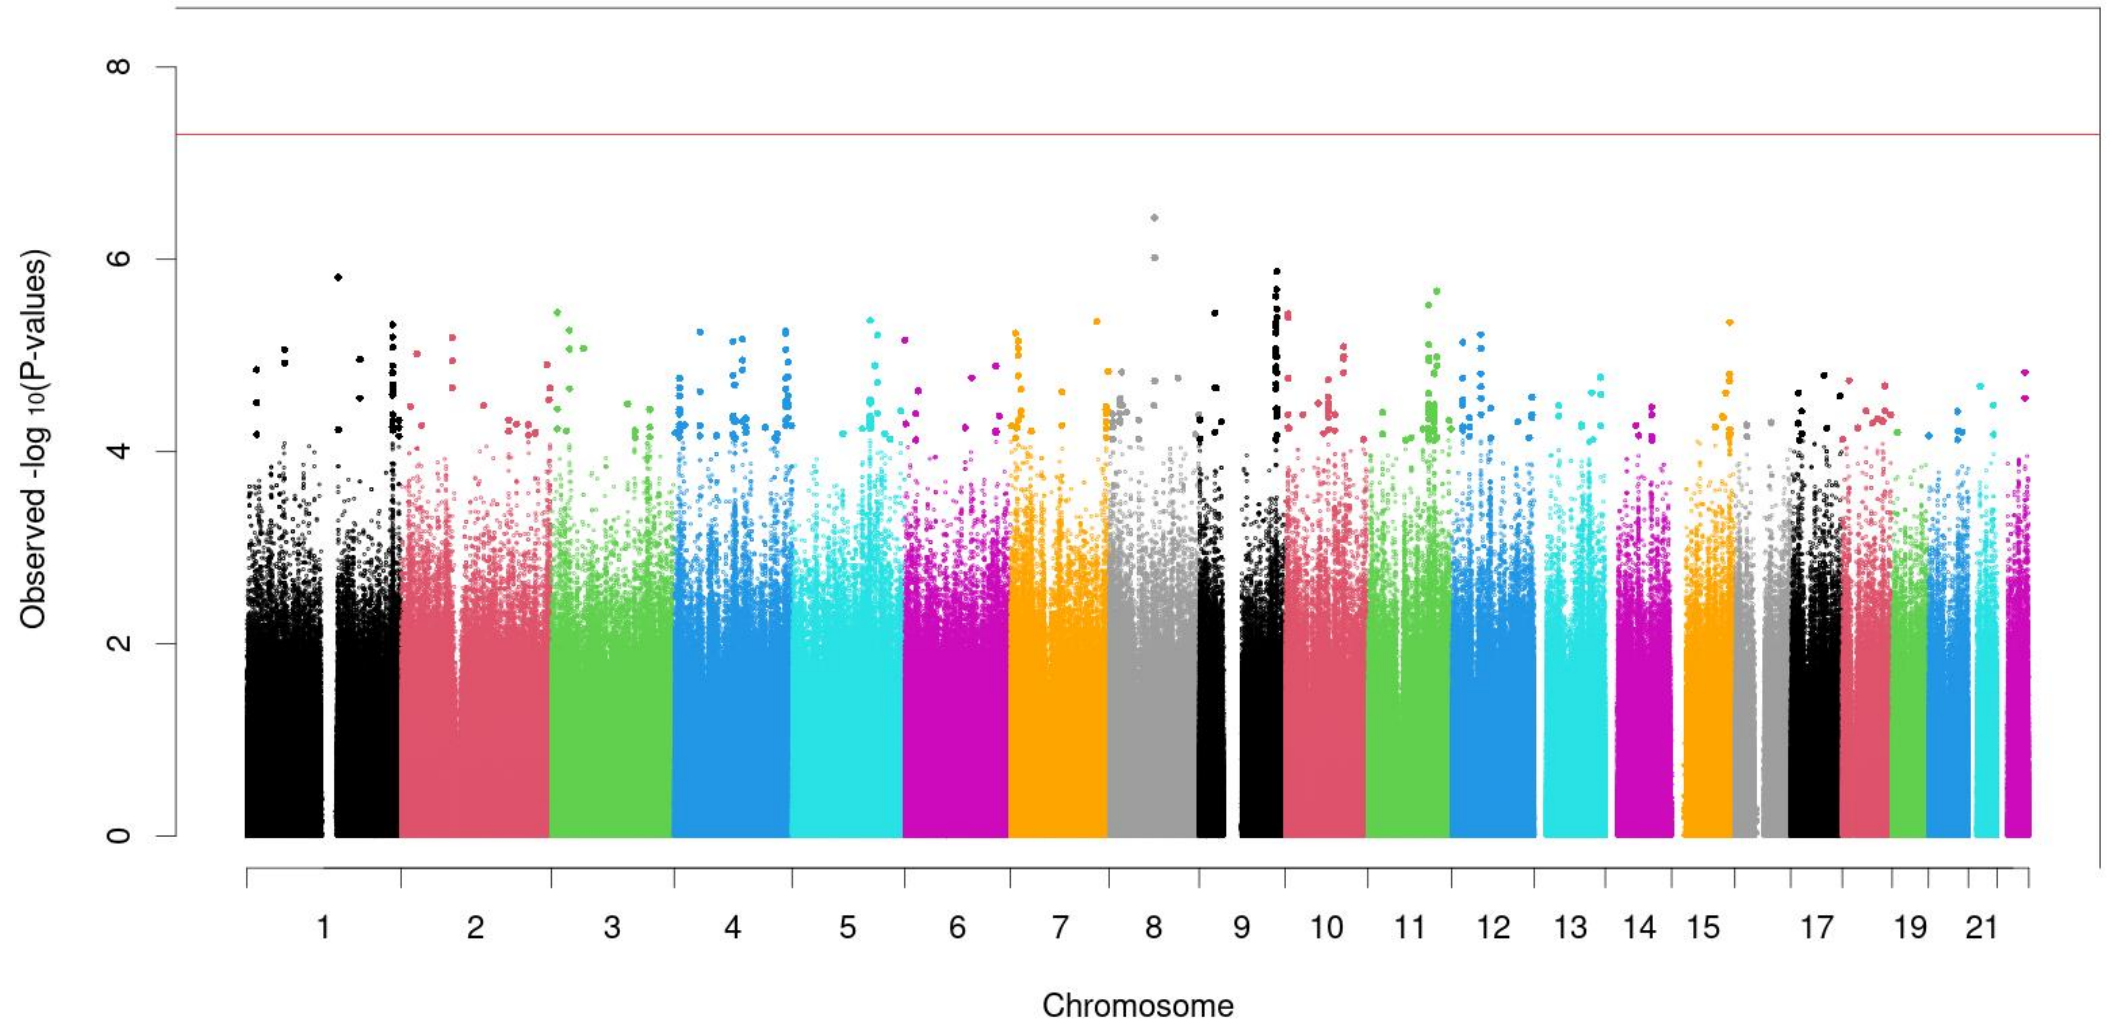

Manhattan plot for mz239.017\_t24.2, cystine

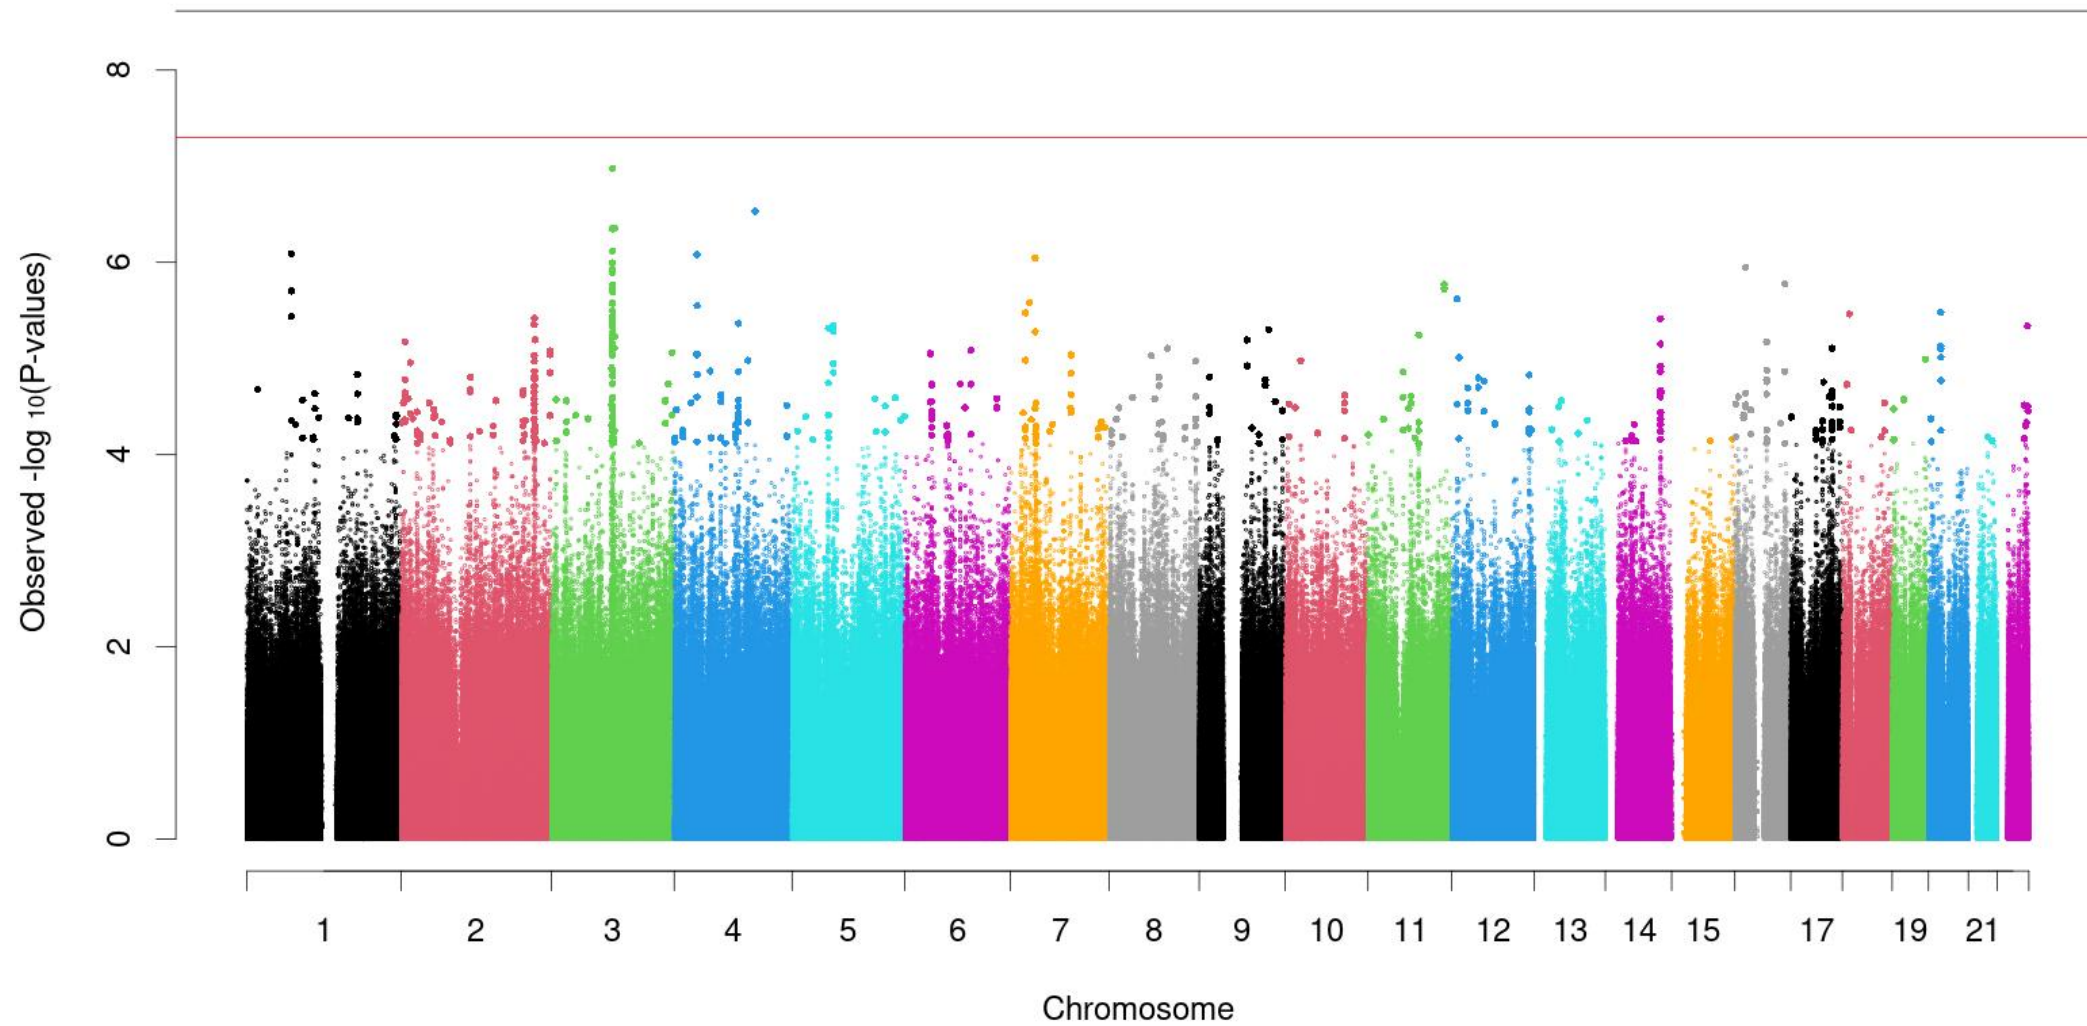

Manhattan plot for mz241.0311\_t181.3, cystine

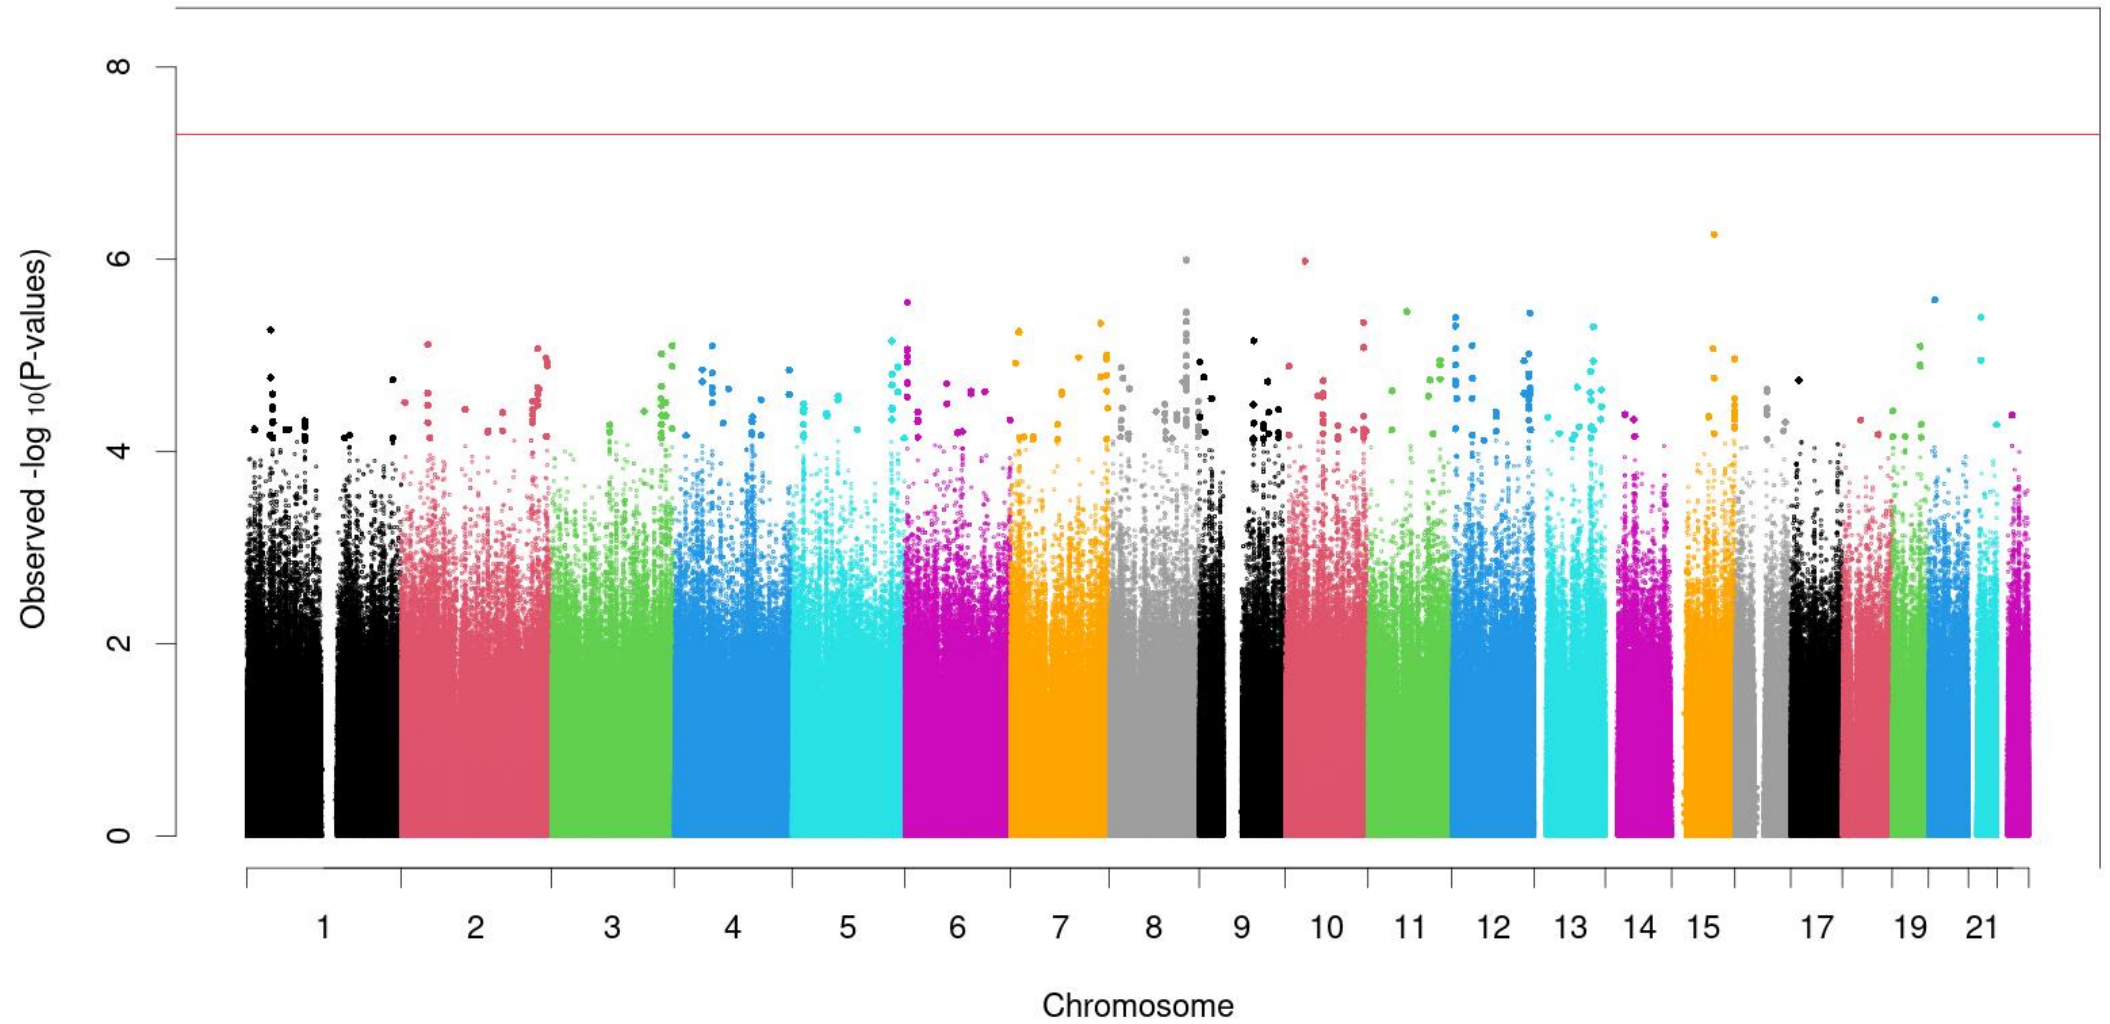



Manhattan plot for mz243.0627\_t22.4, uridine

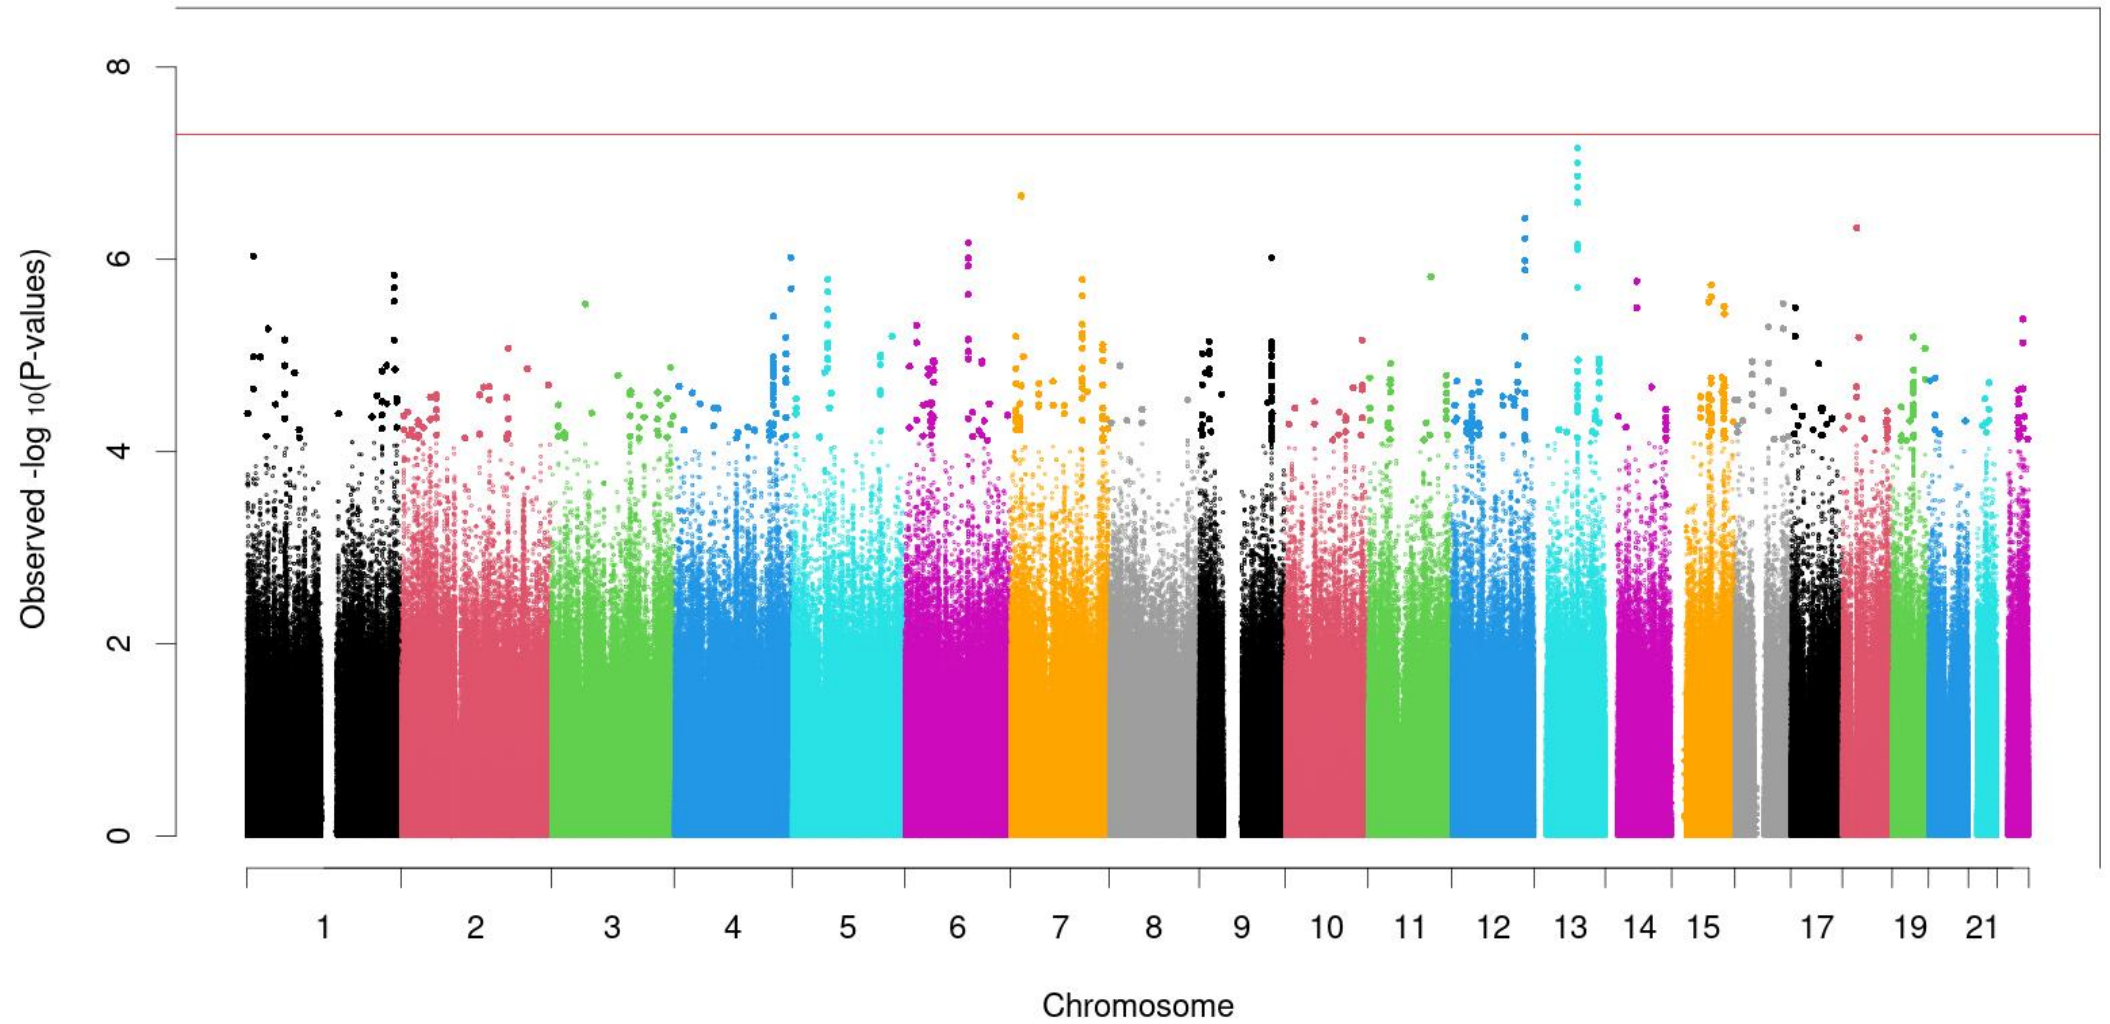

Manhattan plot for mz245.0769\_t45.3, uridine

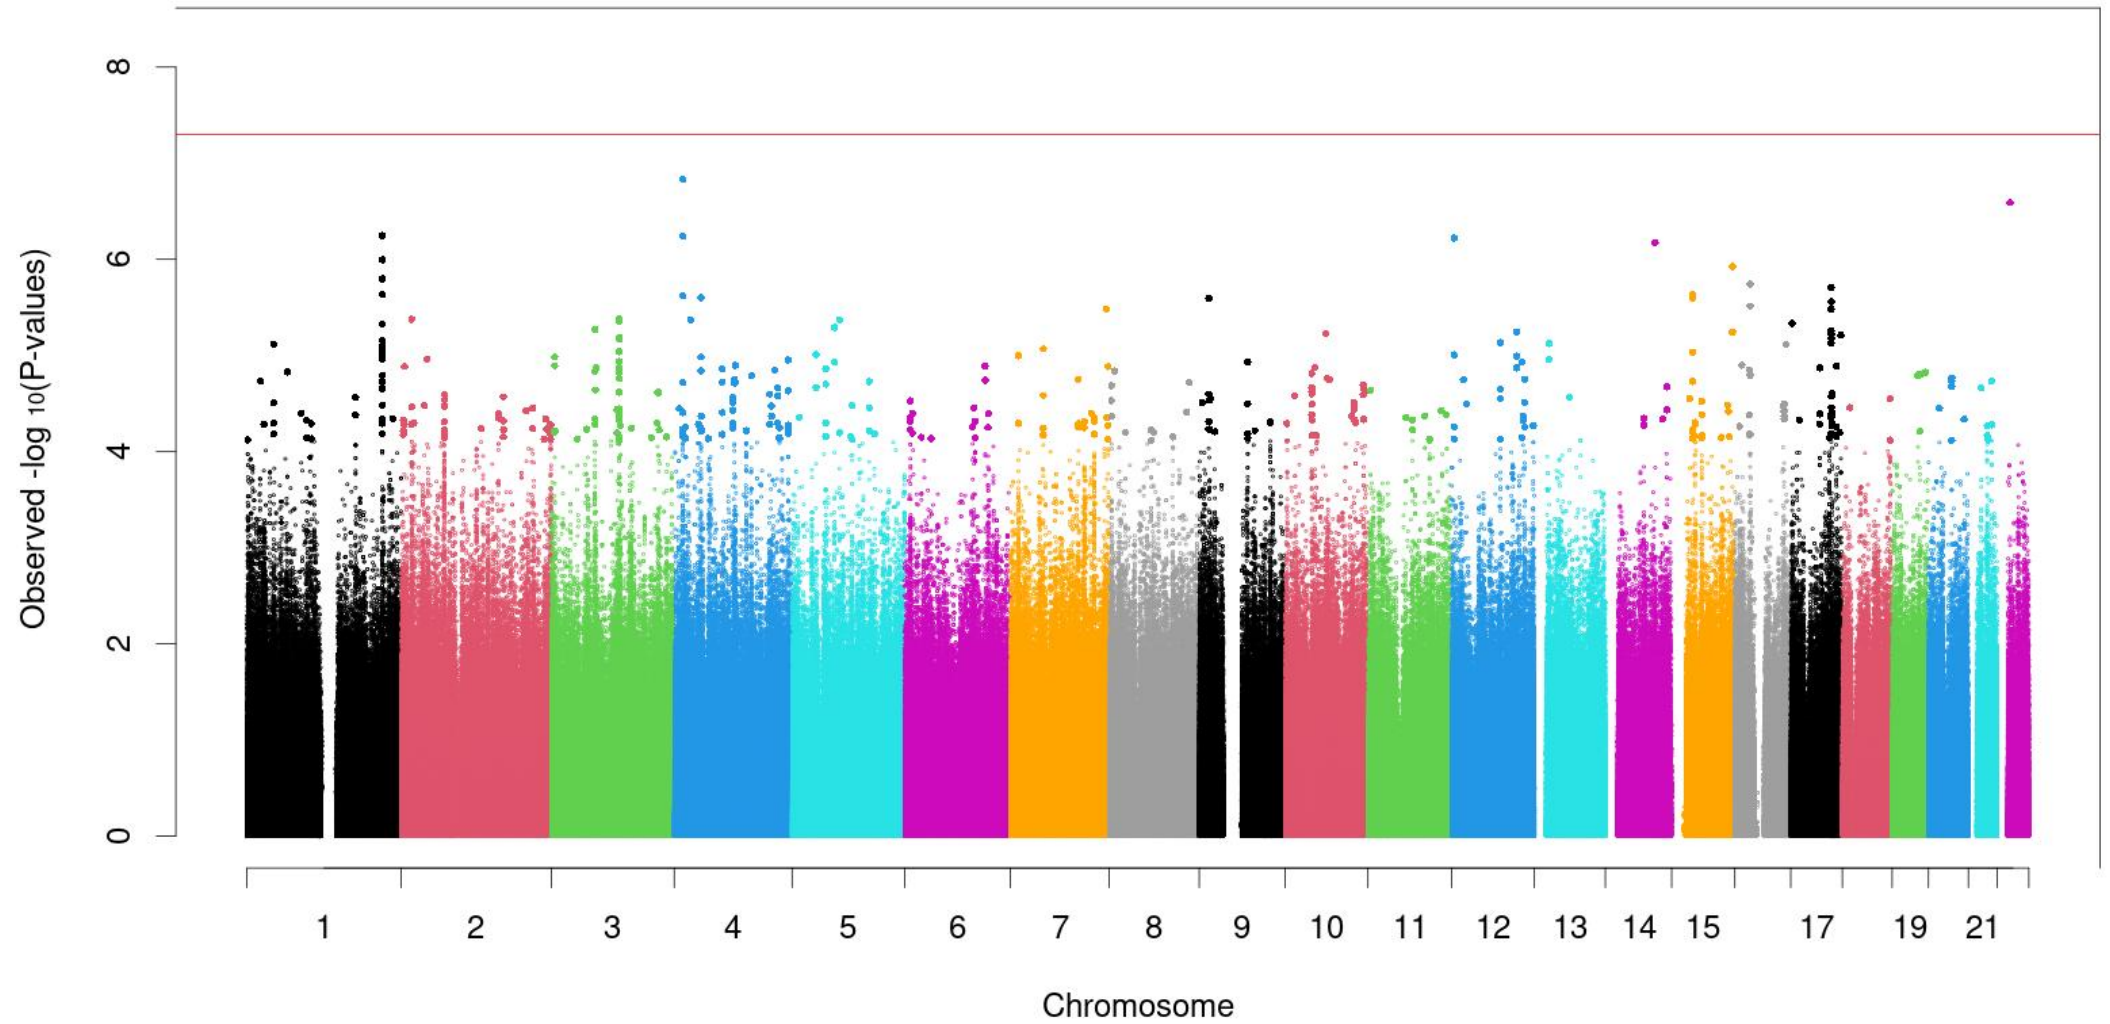

Manhattan plot for mz245.0935\_t49, n-acetyl-d-tryptophan

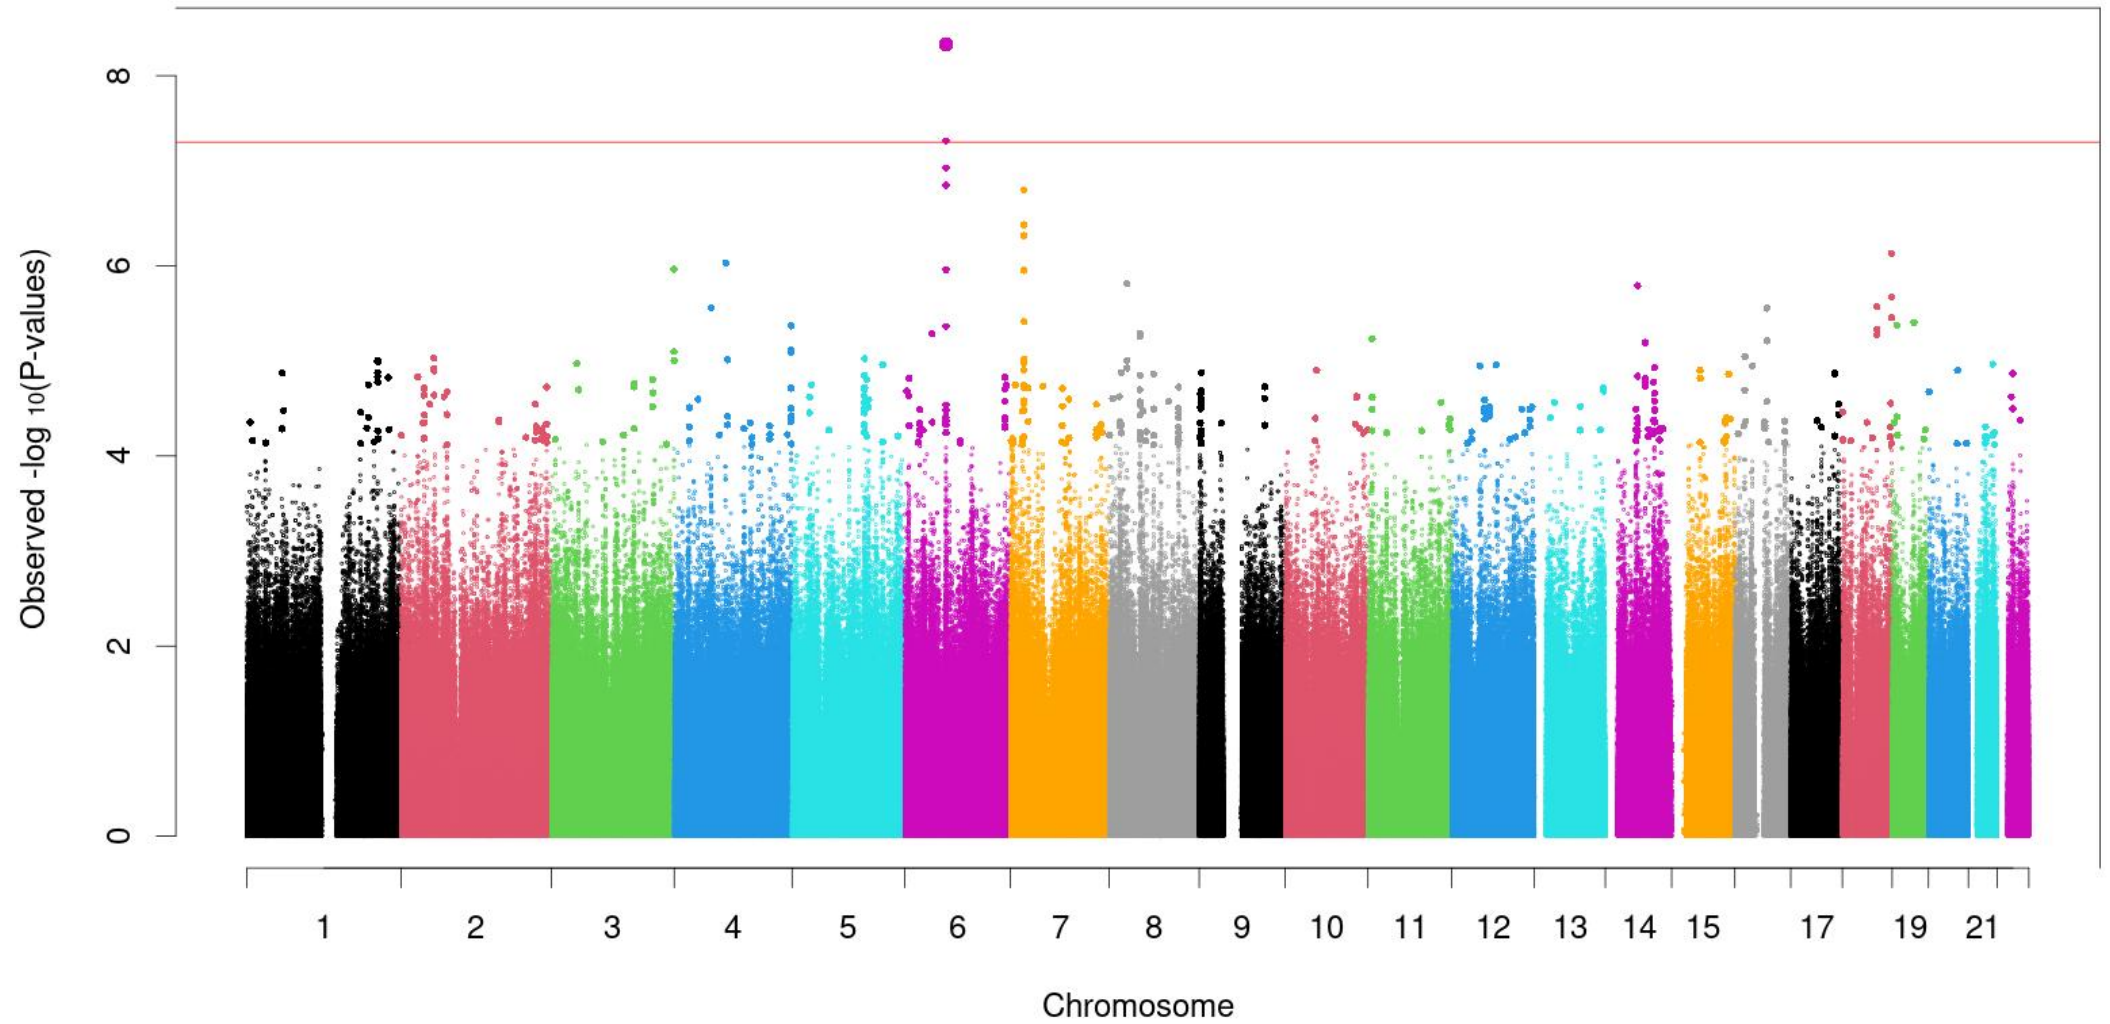



Manhattan plot for mz245.0971\_t55, biotin

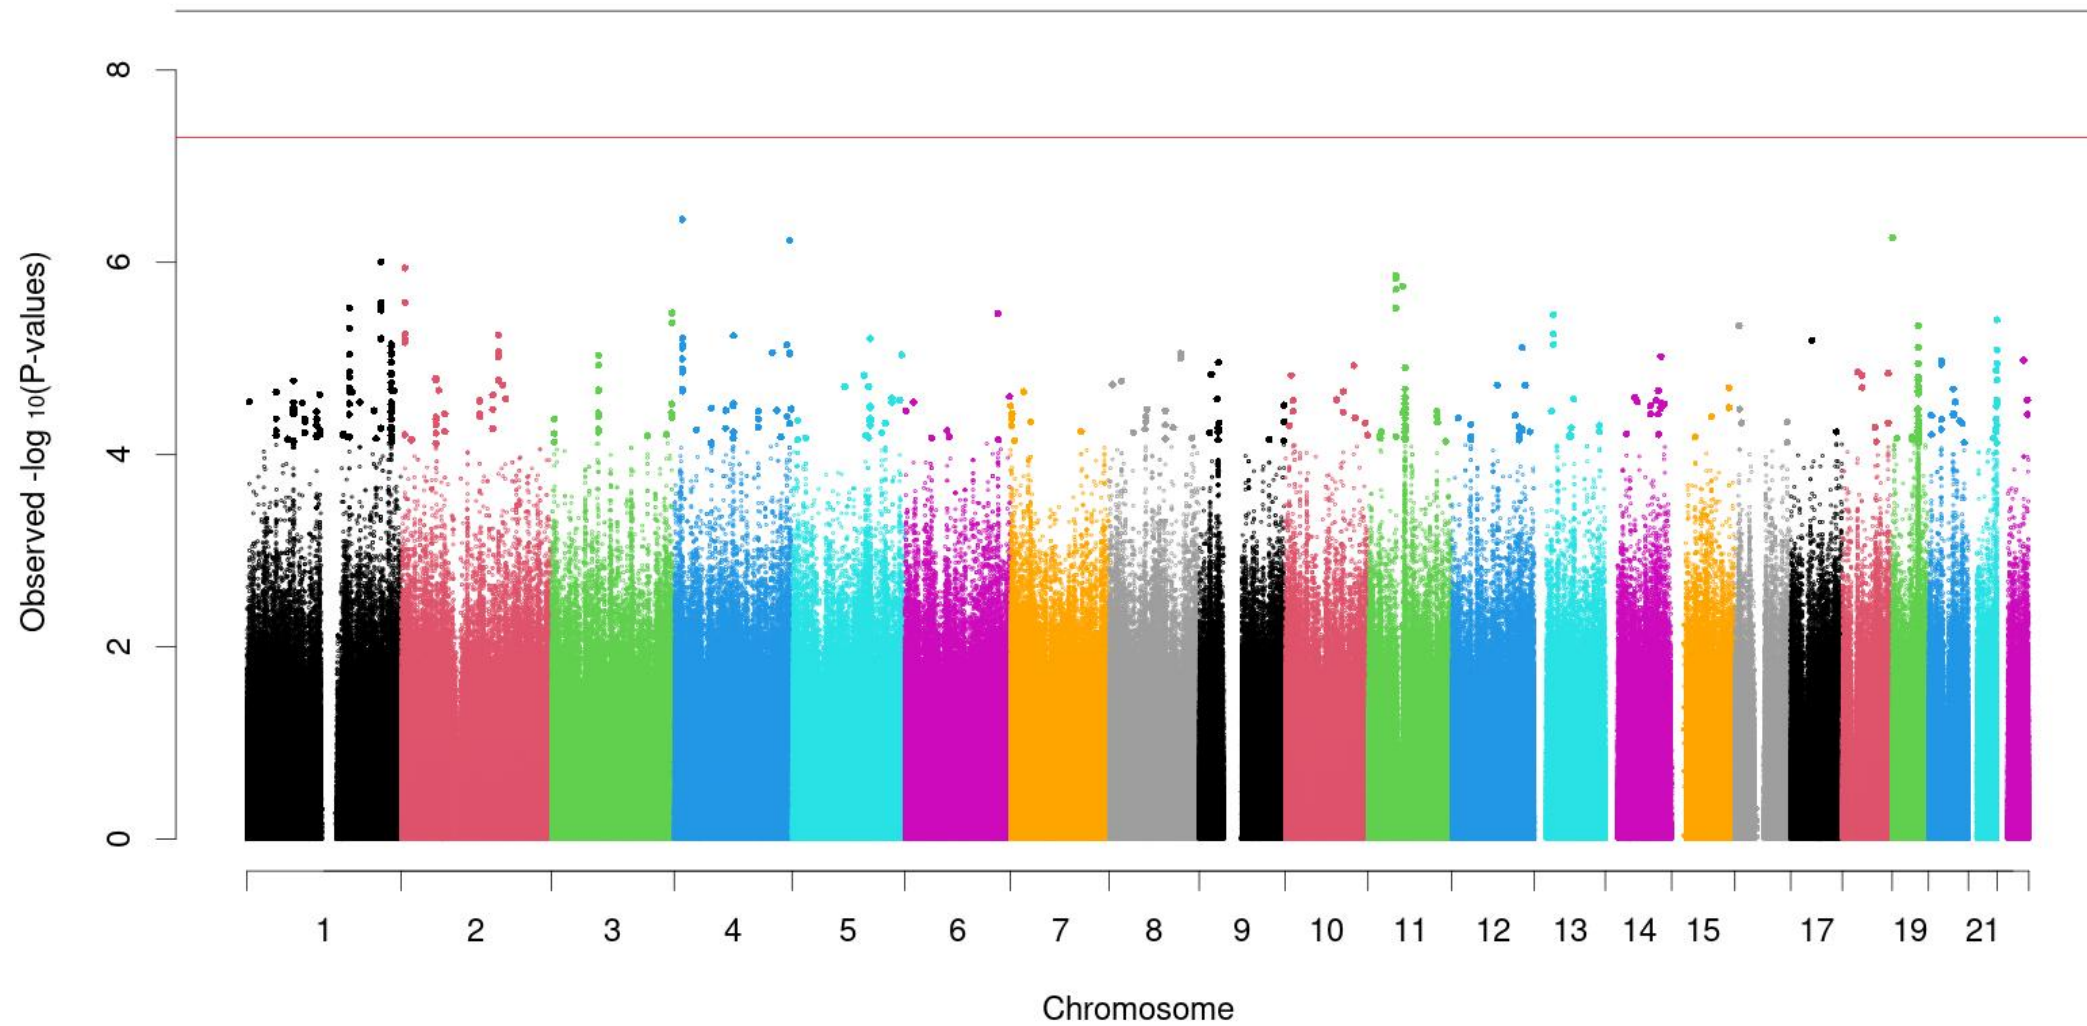

Manhattan plot for mz247.1076\_t34.1, n-acetyl-d-tryptophan

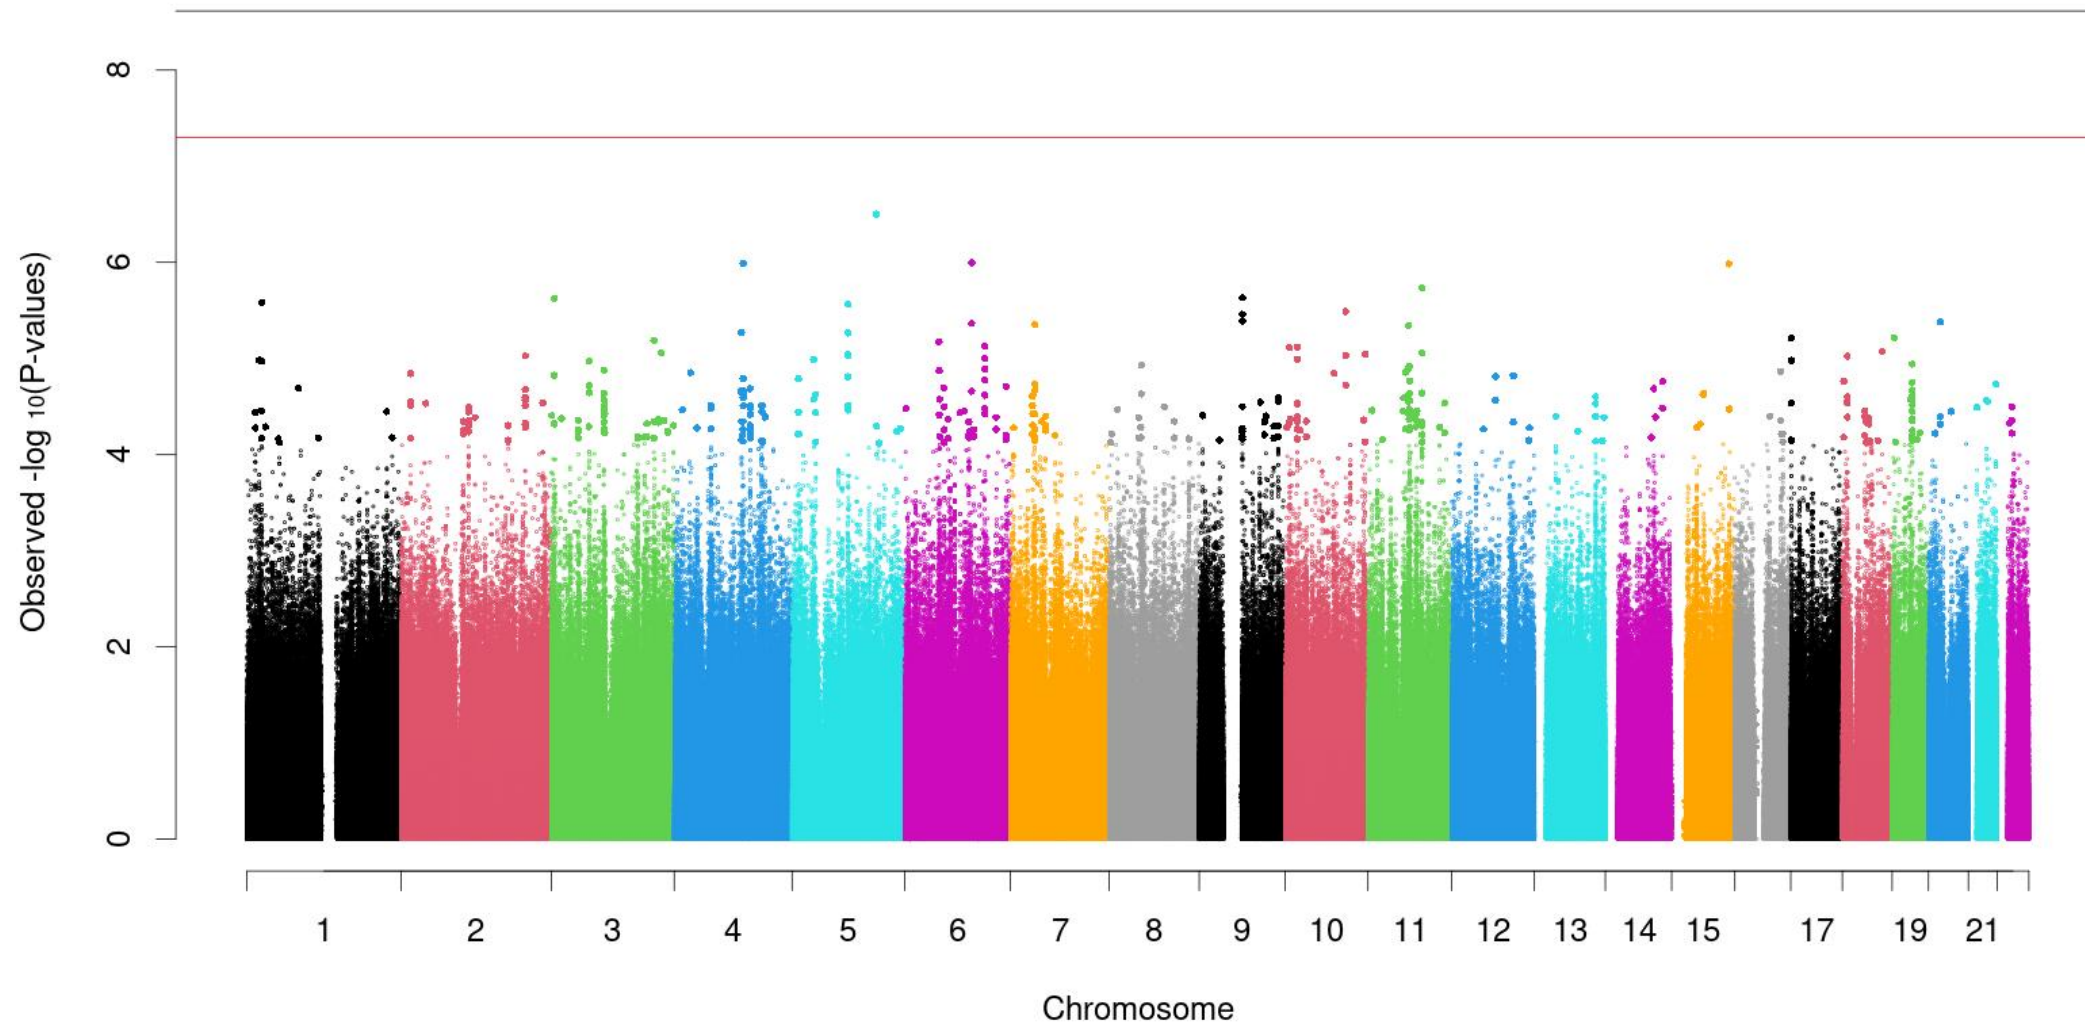

Manhattan plot for mz253.2177\_t230.4, palmitoleic acid

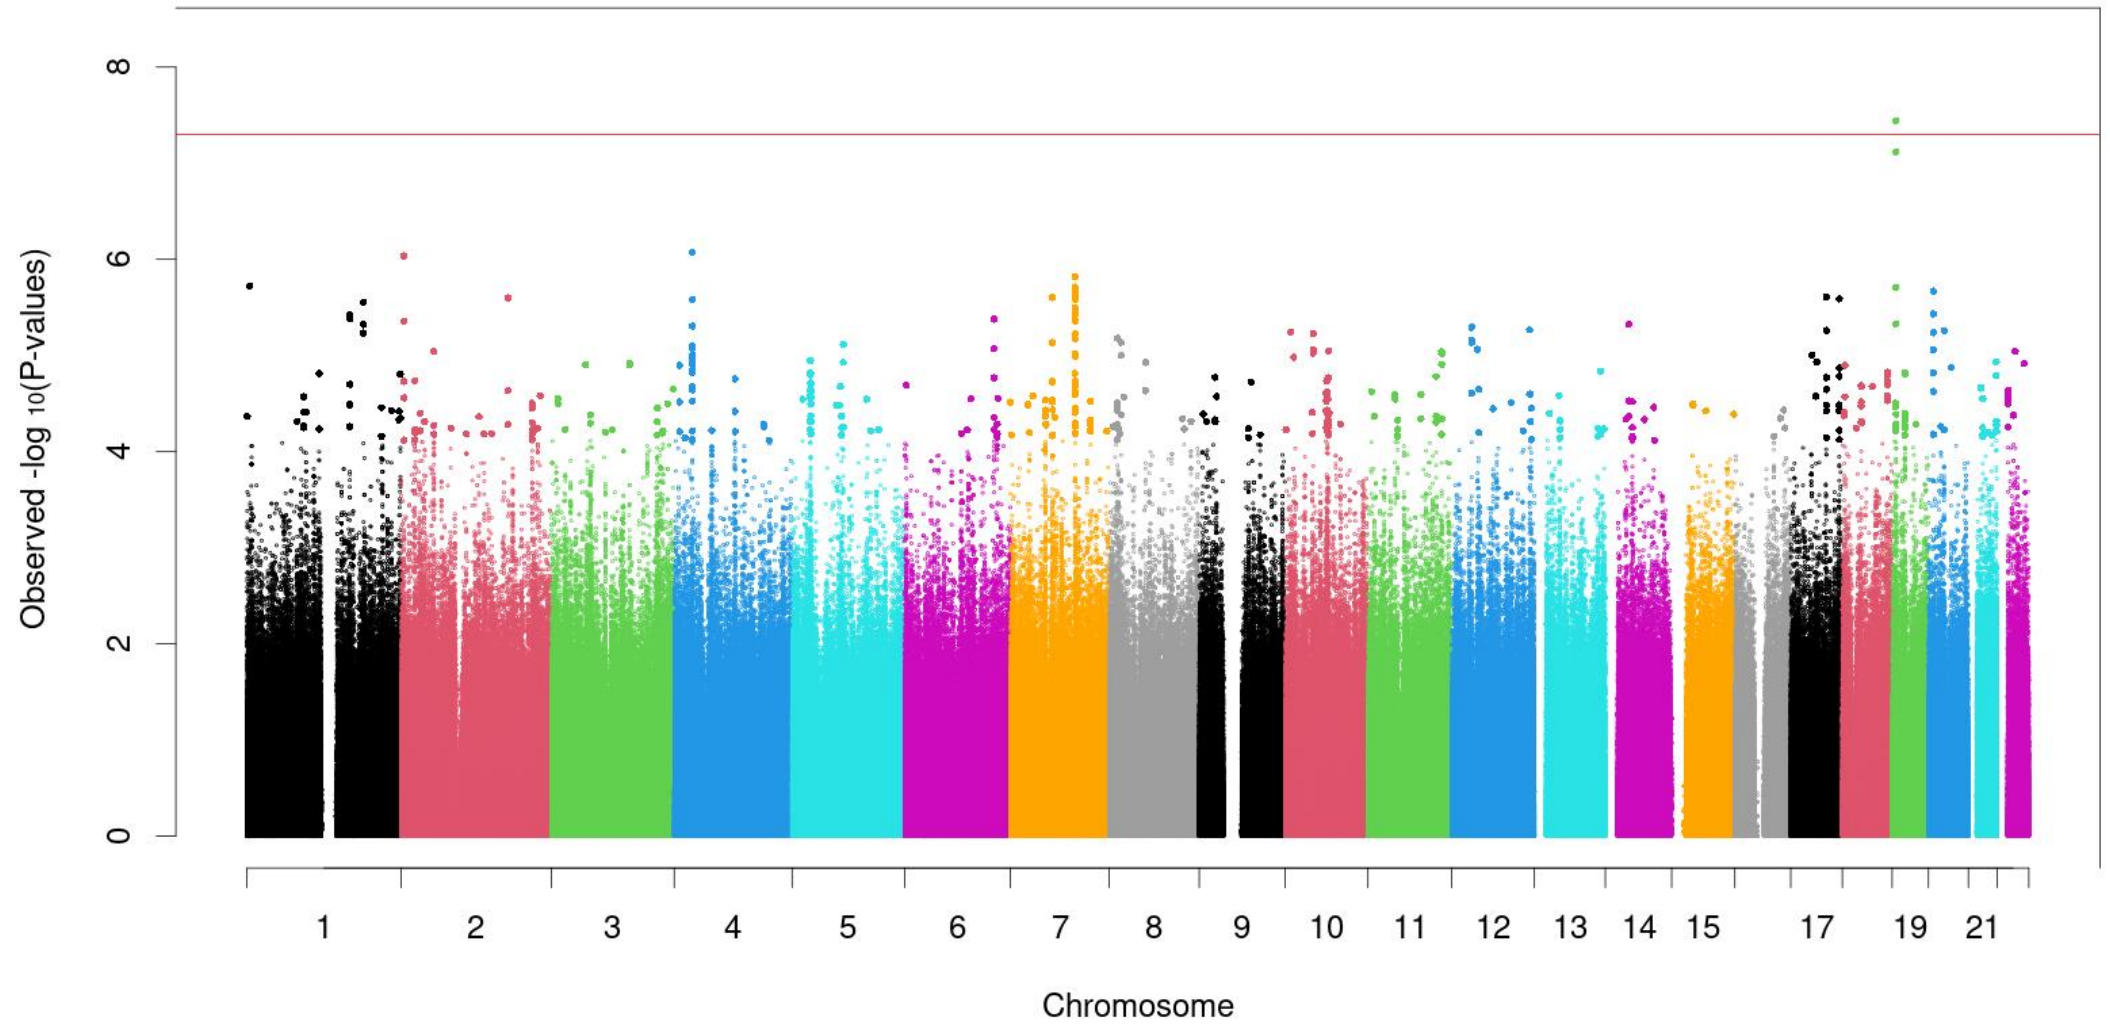



Manhattan plot for mz255.2318\_t21.7, palmitoleic acid

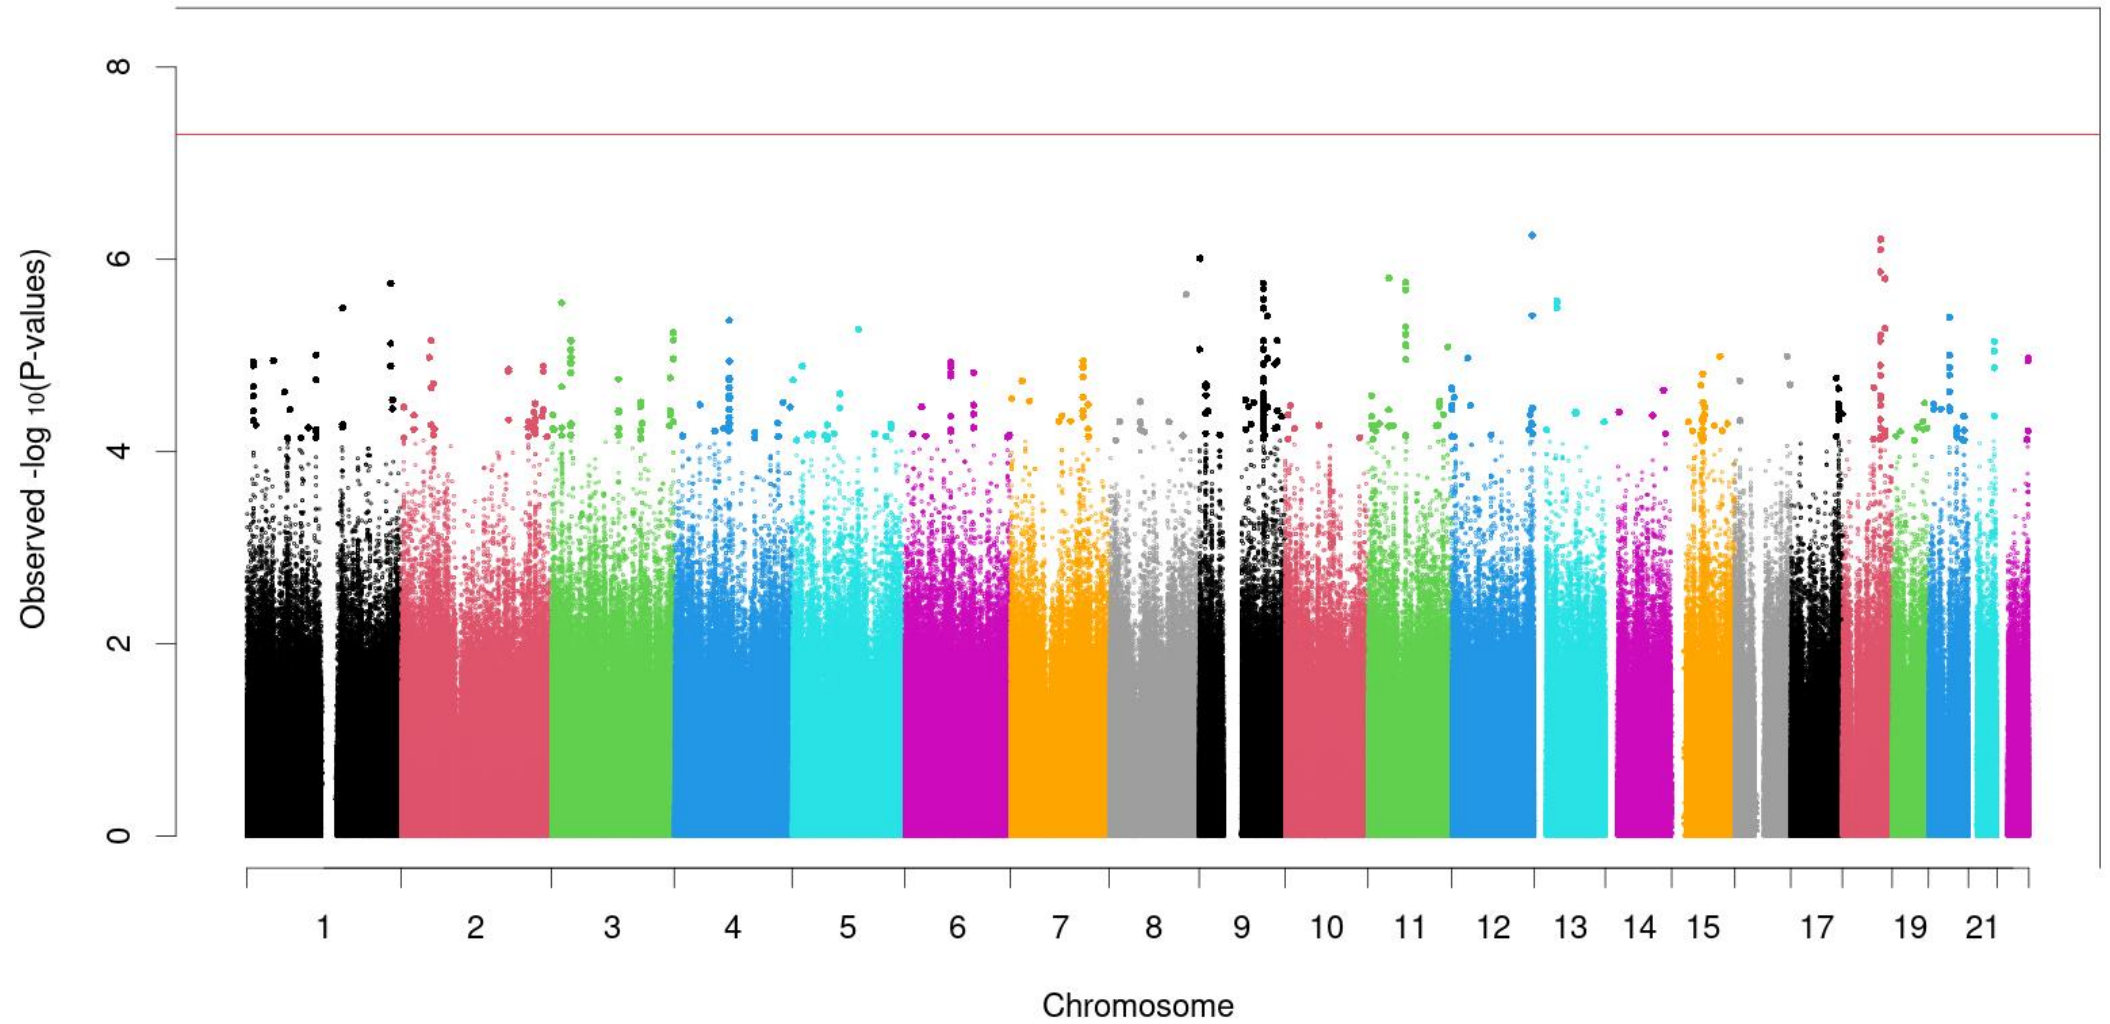

Manhattan plot for mz258.1102\_t114.4, sn-glycero-3-phosphocholine

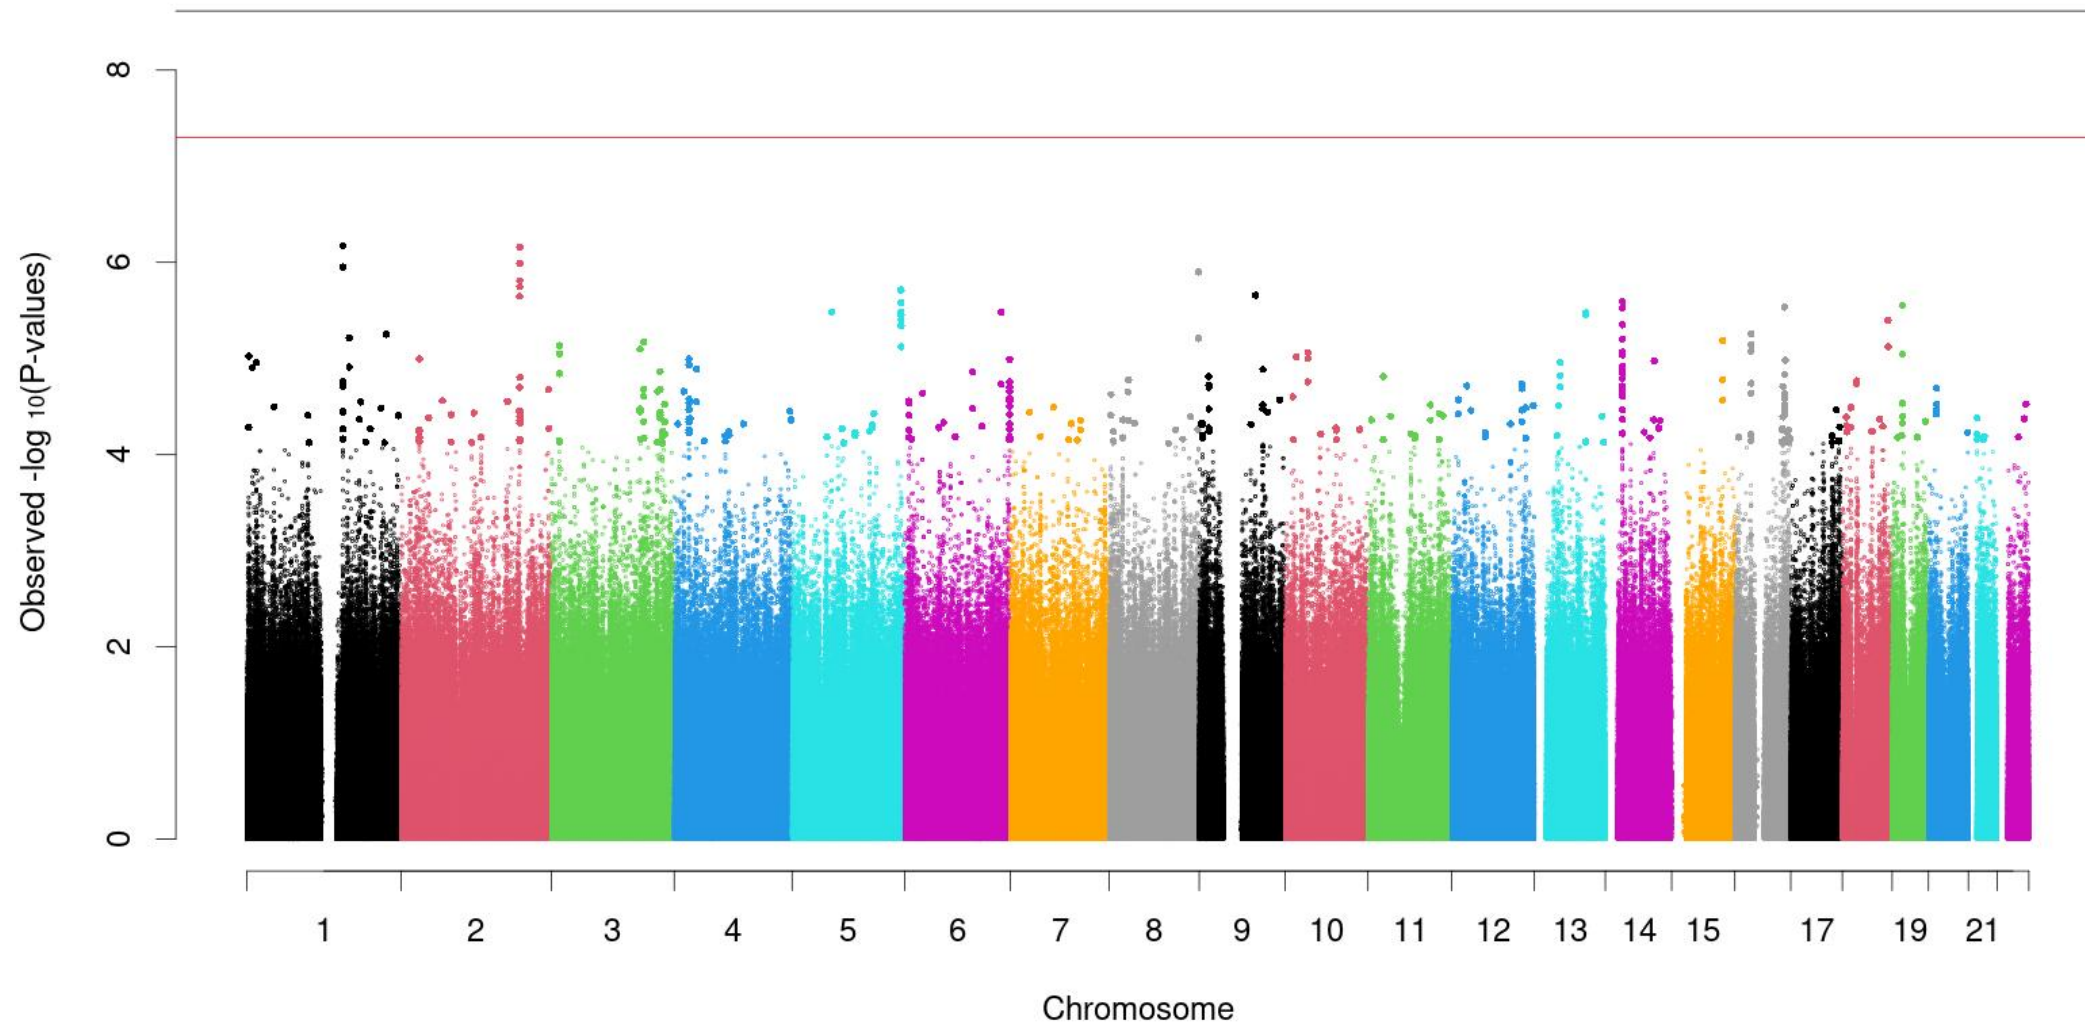

Manhattan plot for mz266.0893\_t18.4, adenosine

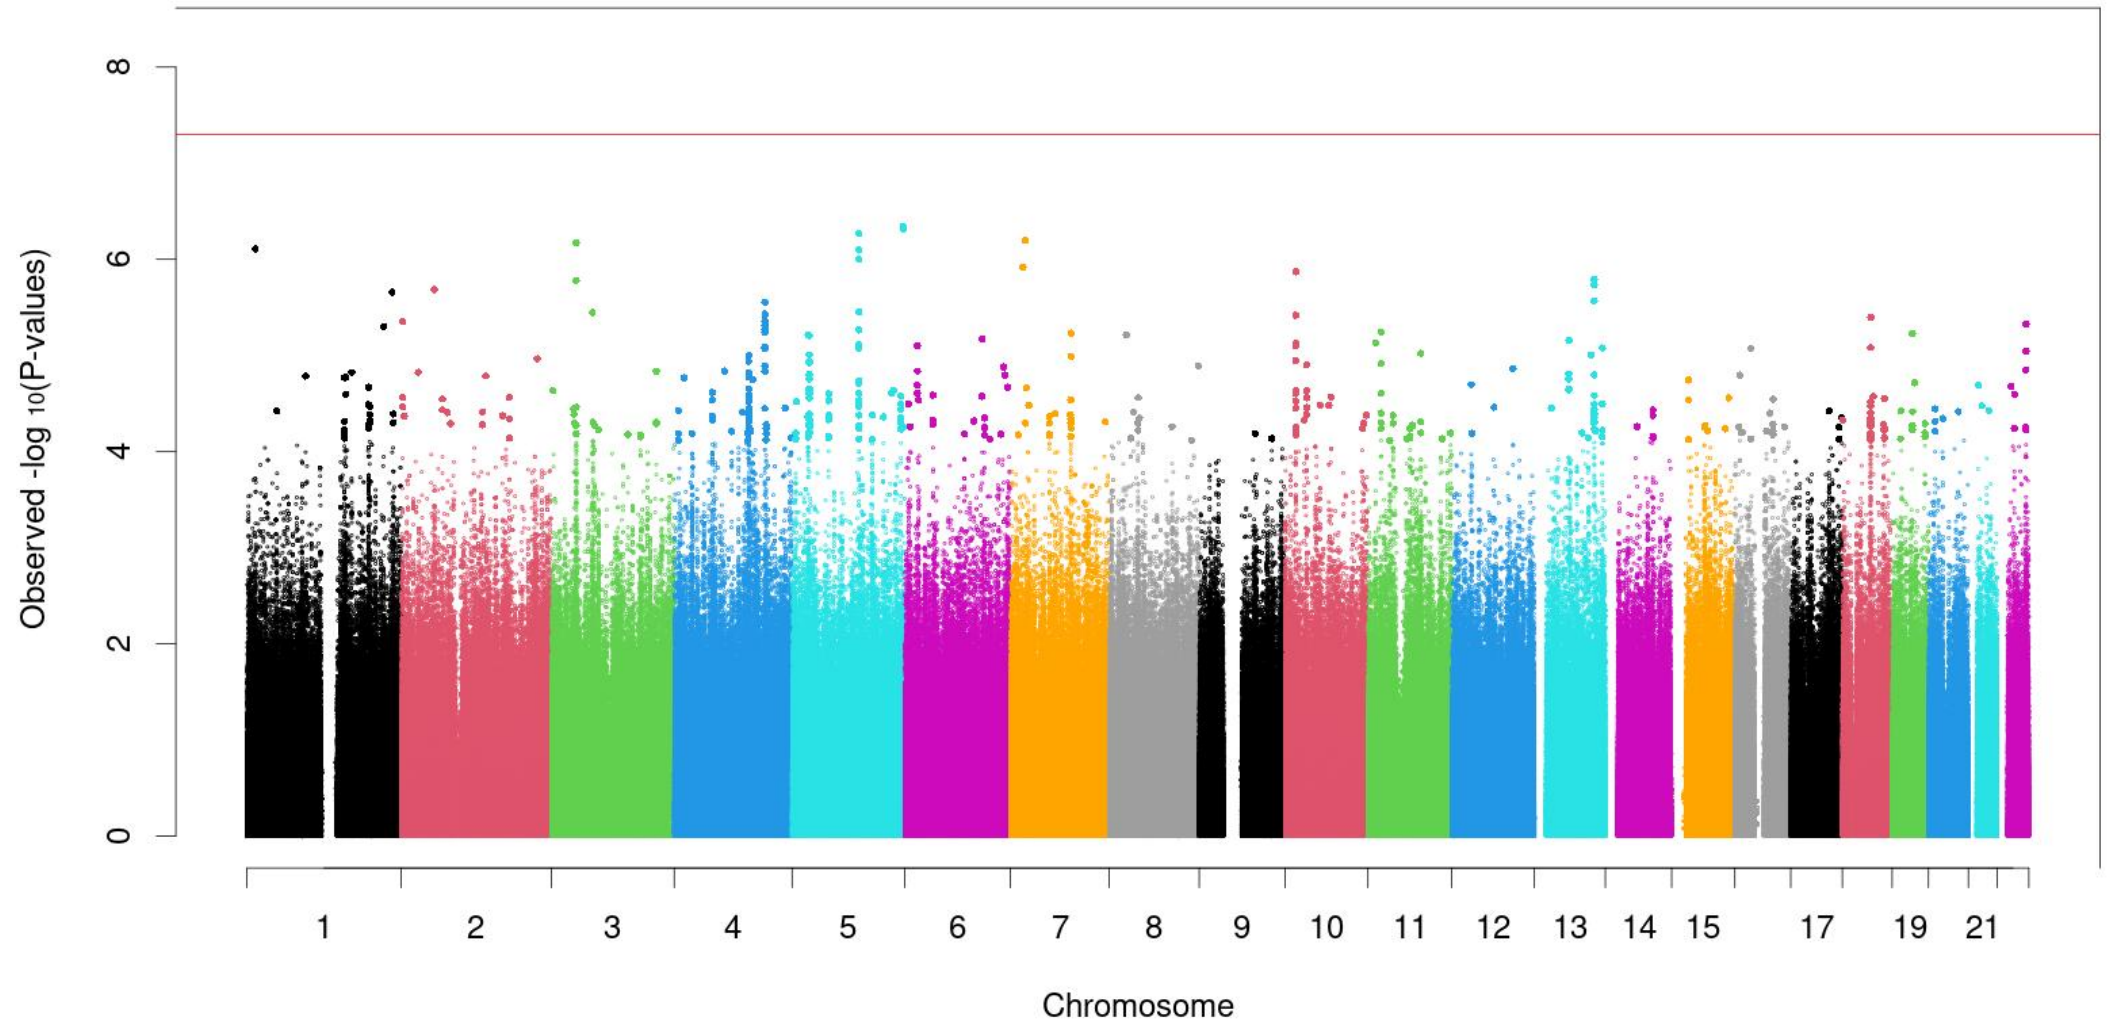



Manhattan plot for mz266.1215\_t33.8, thiamine

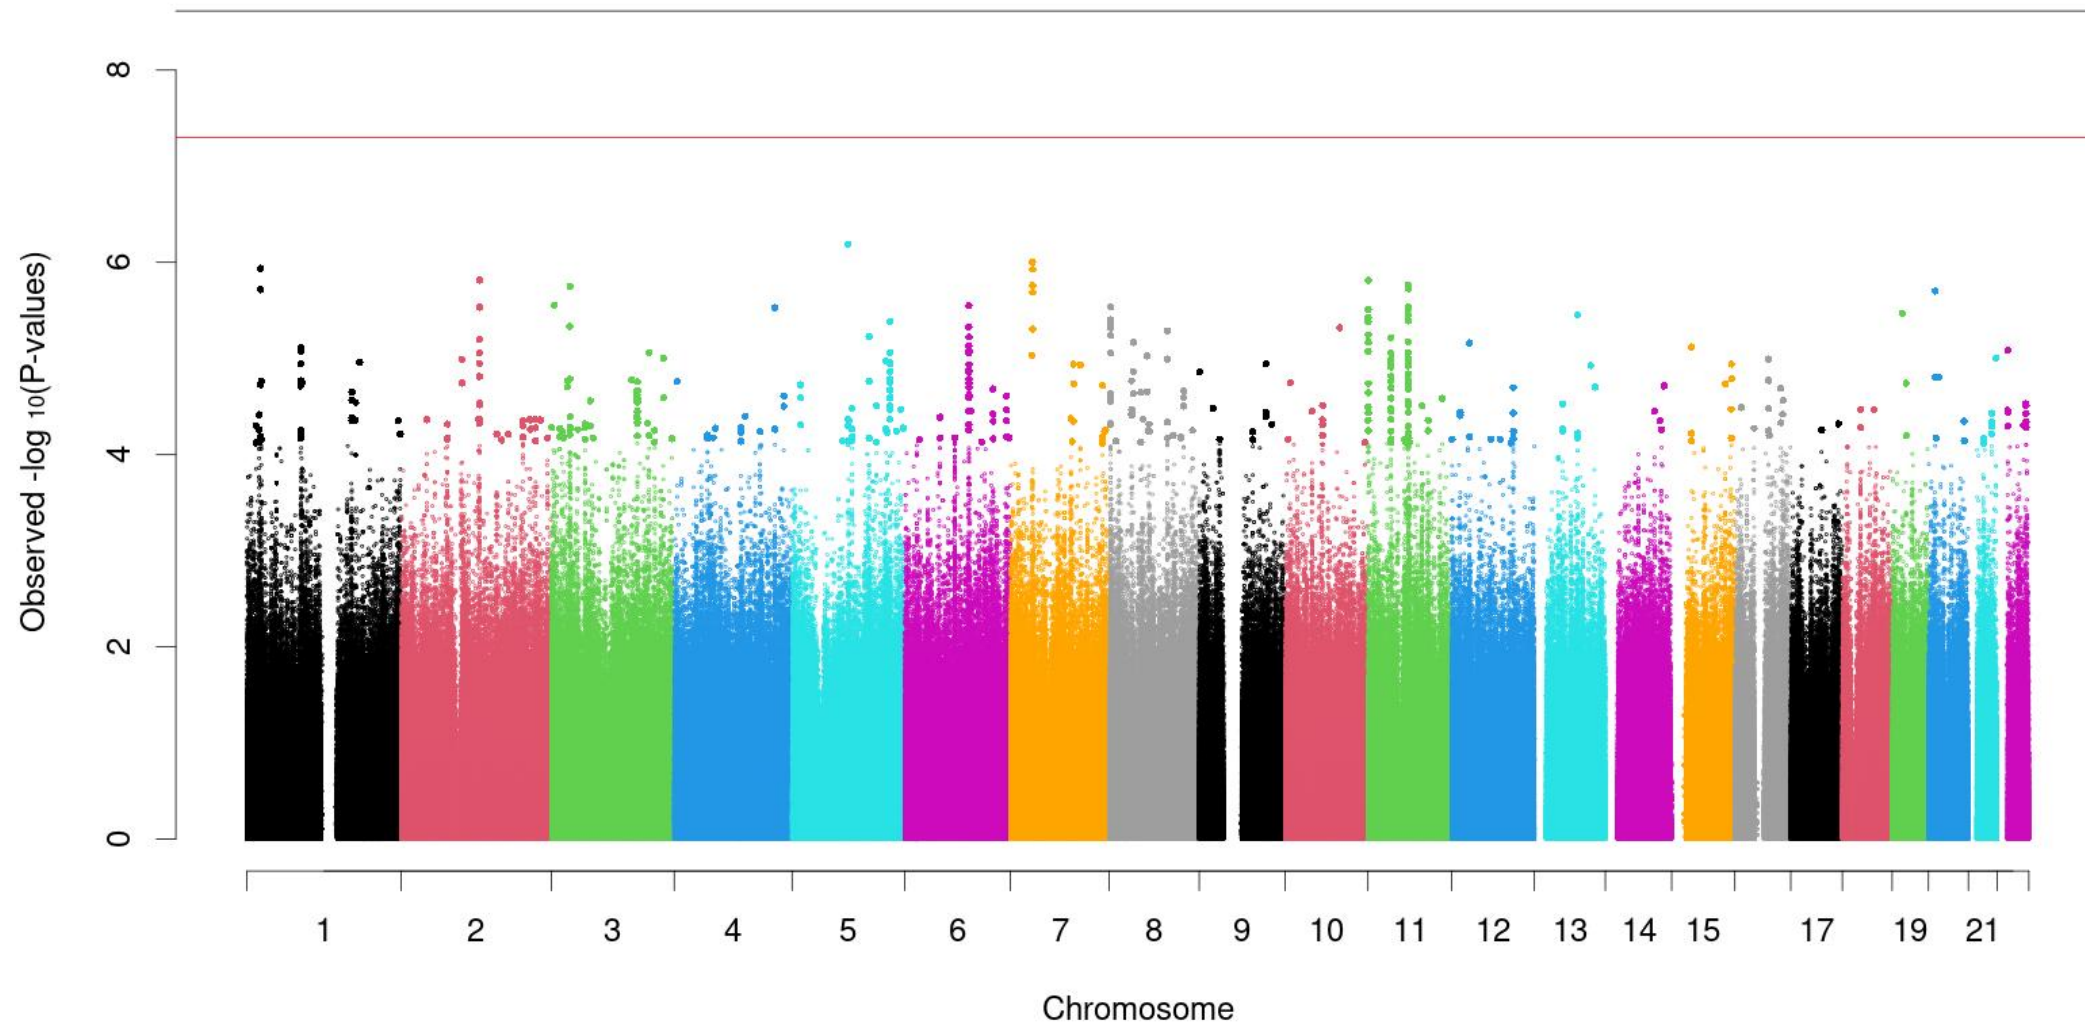

Manhattan plot for mz269.0881\_t43.1, inosine

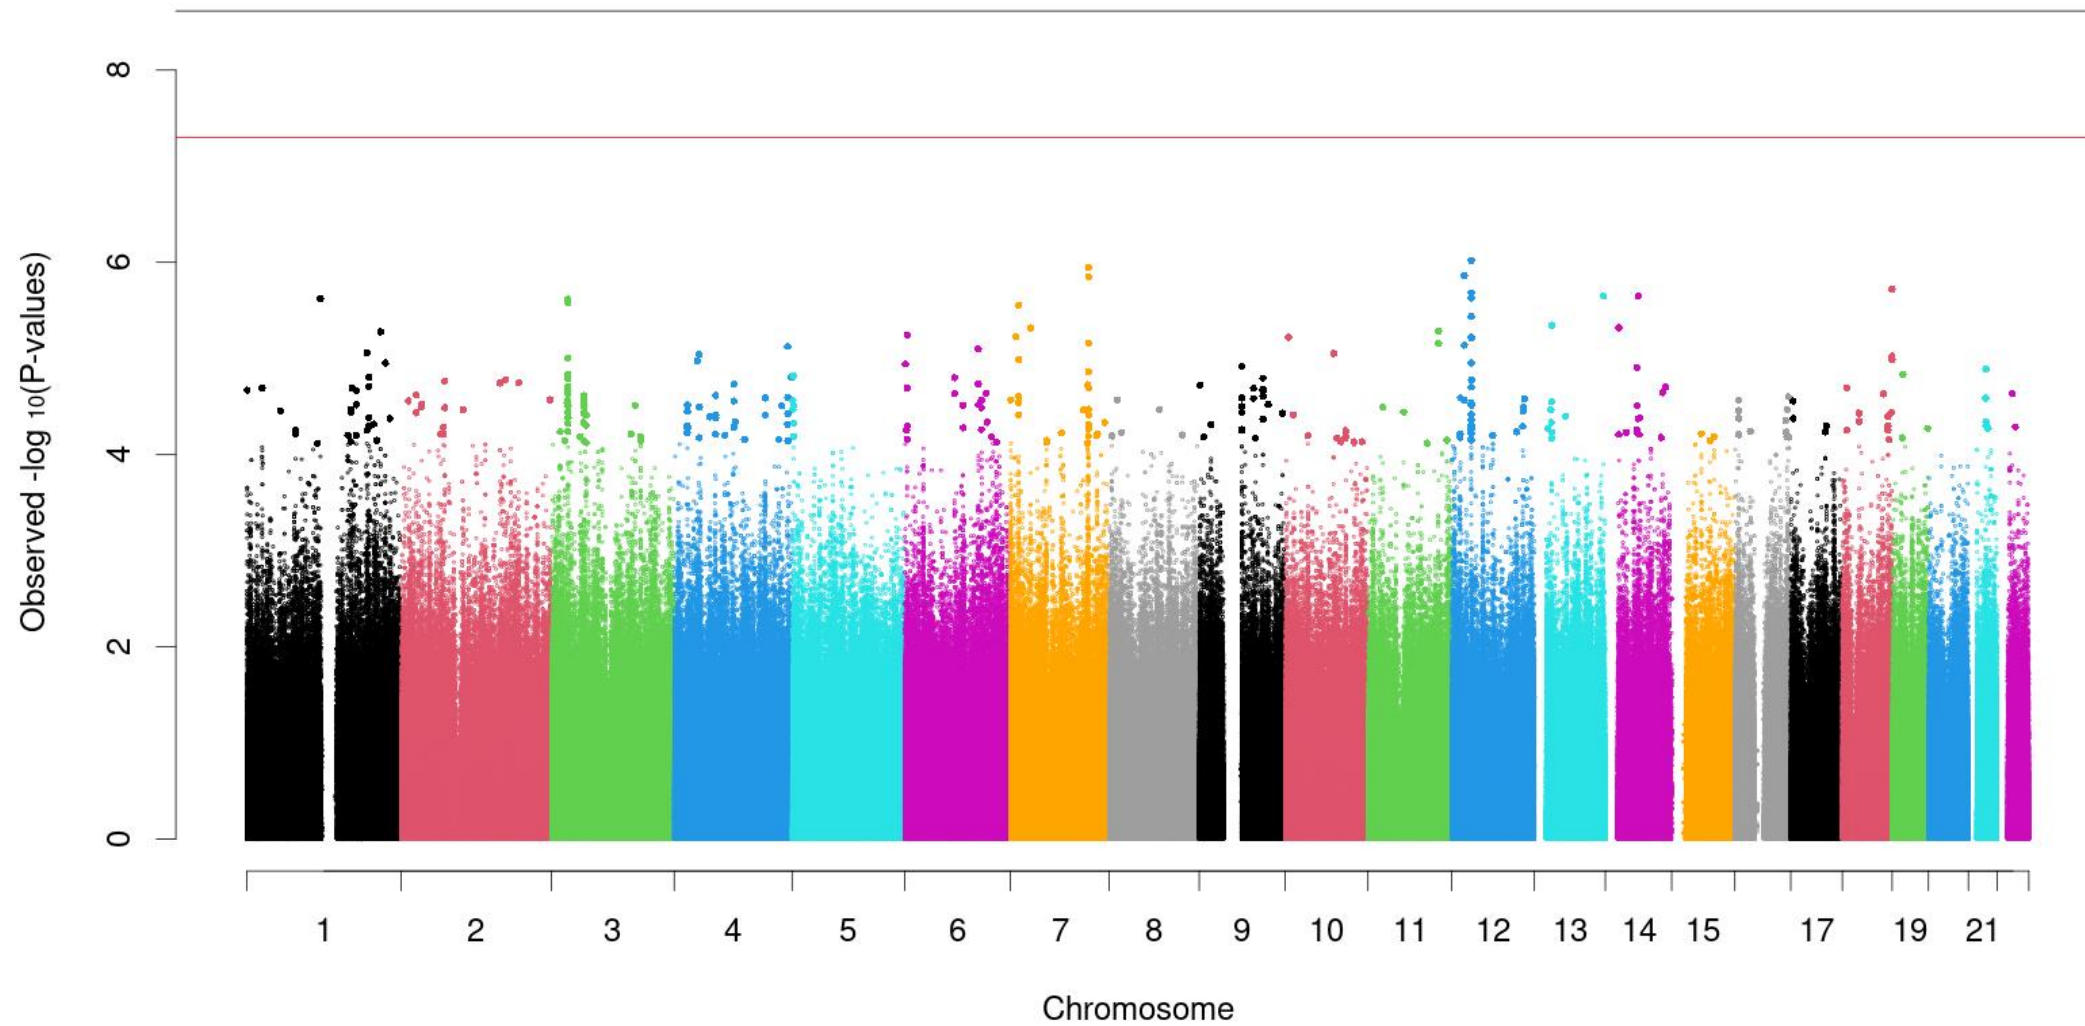

Manhattan plot for mz279.2319\_t23.7, gamma-linolenic acid

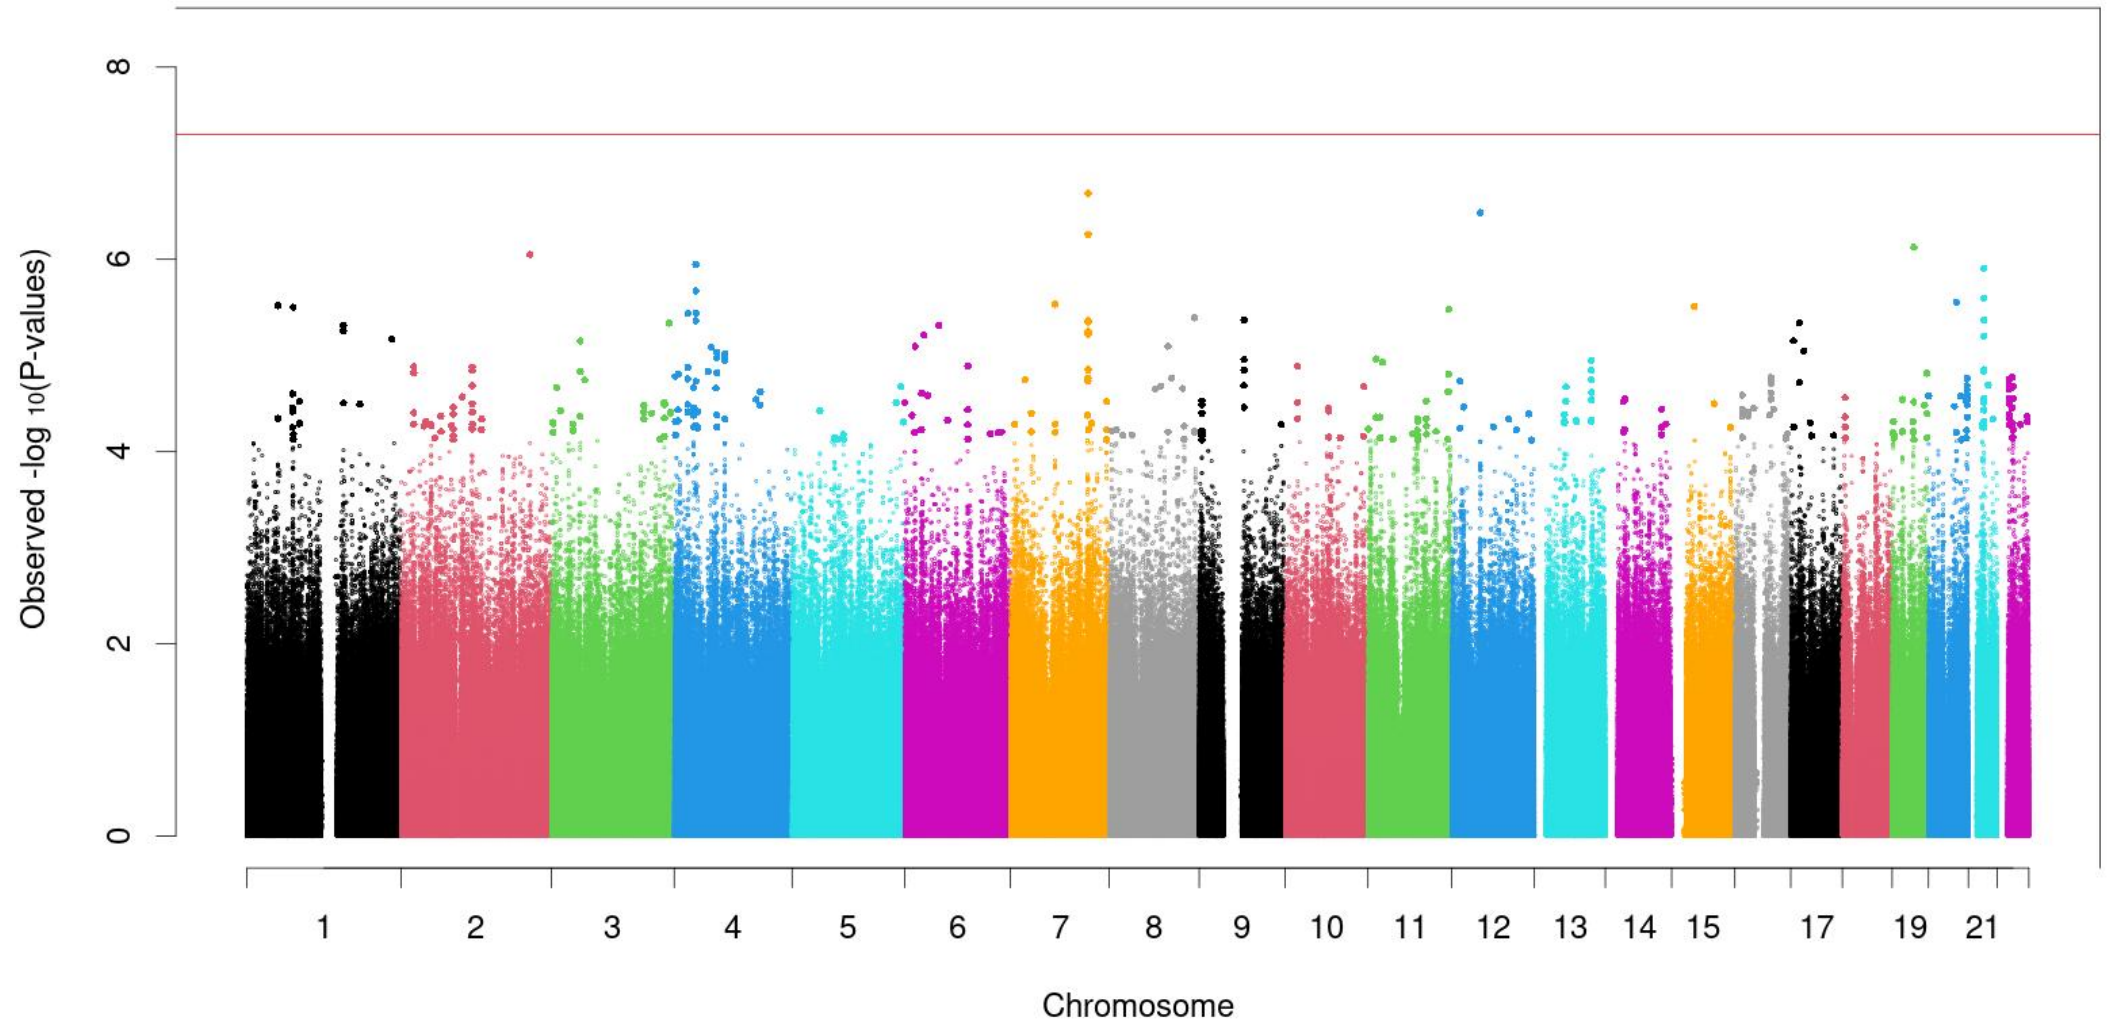



Manhattan plot for mz279.2335\_t237.1, linoleate

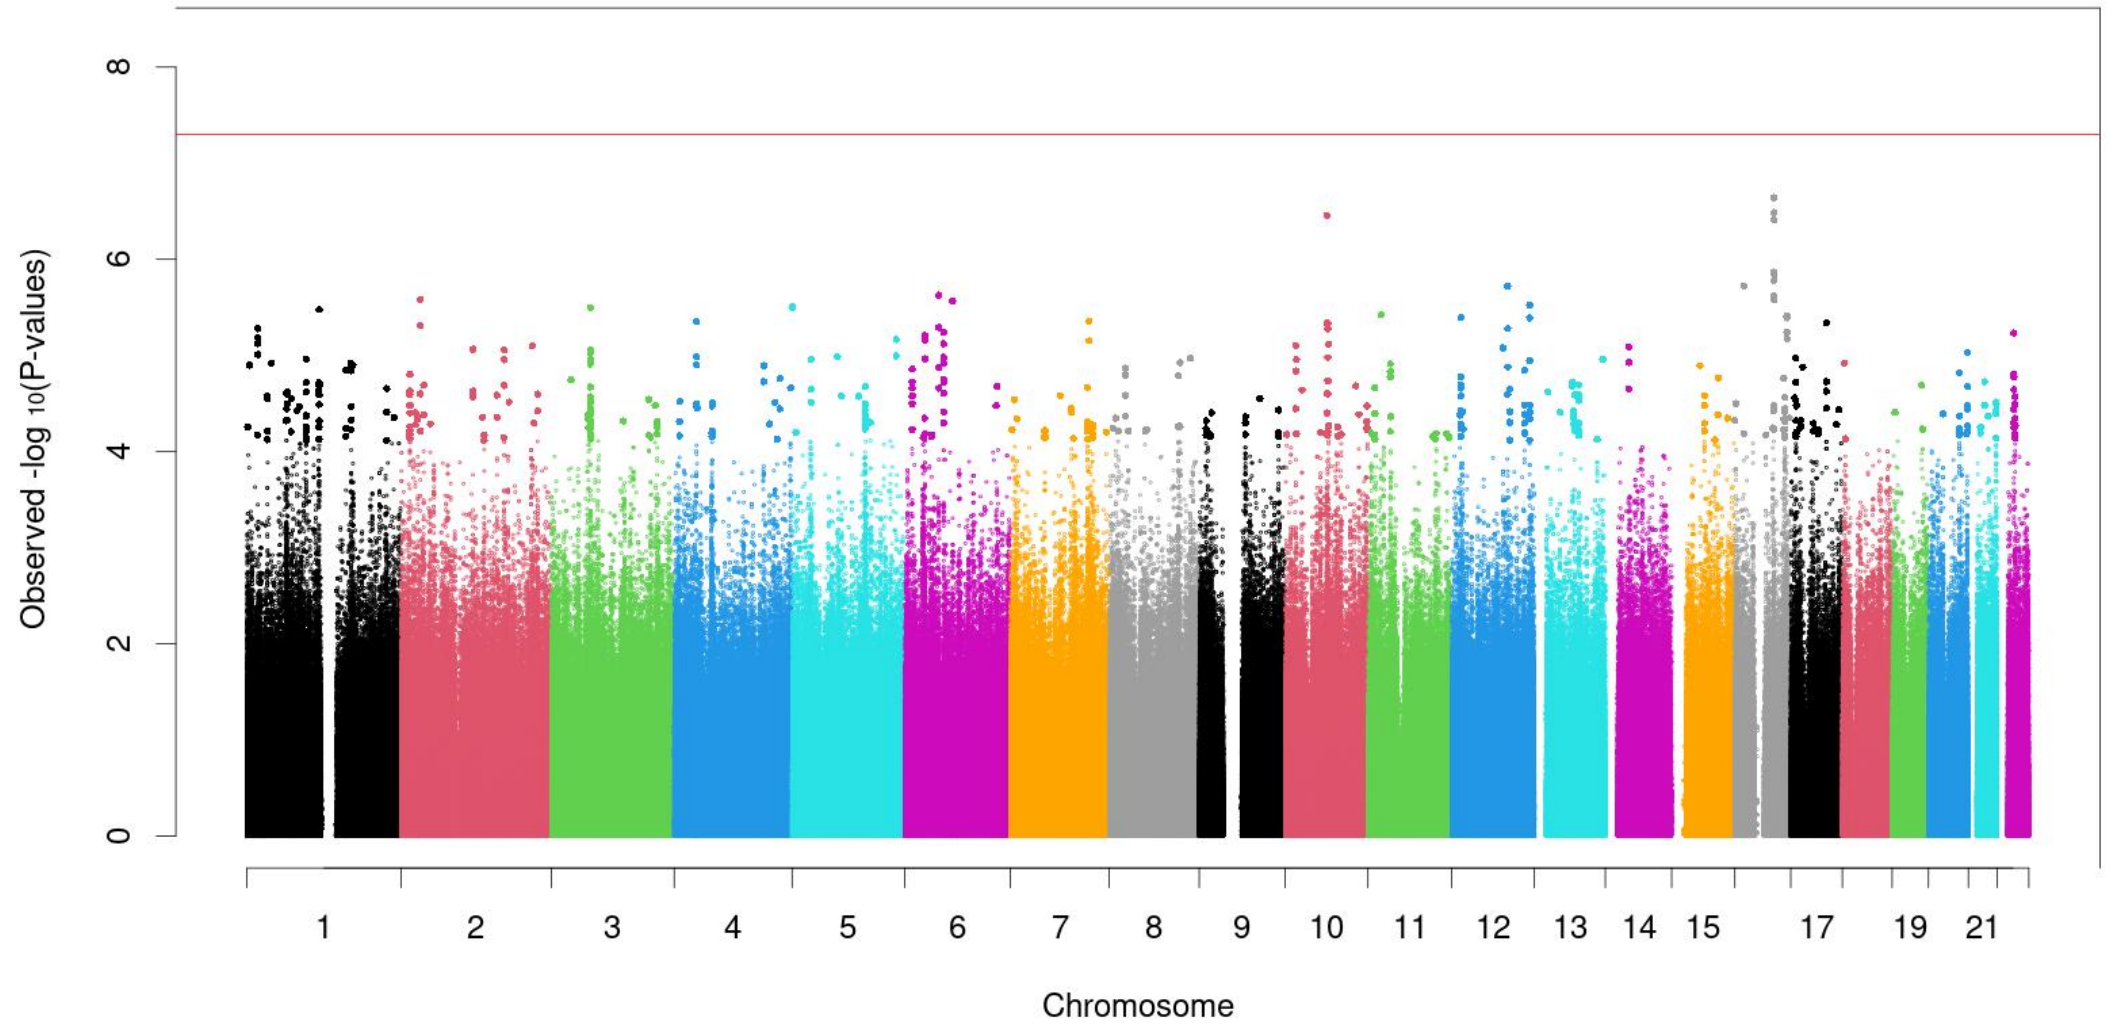

Manhattan plot for mz281.2476\_t28.9, linoleate

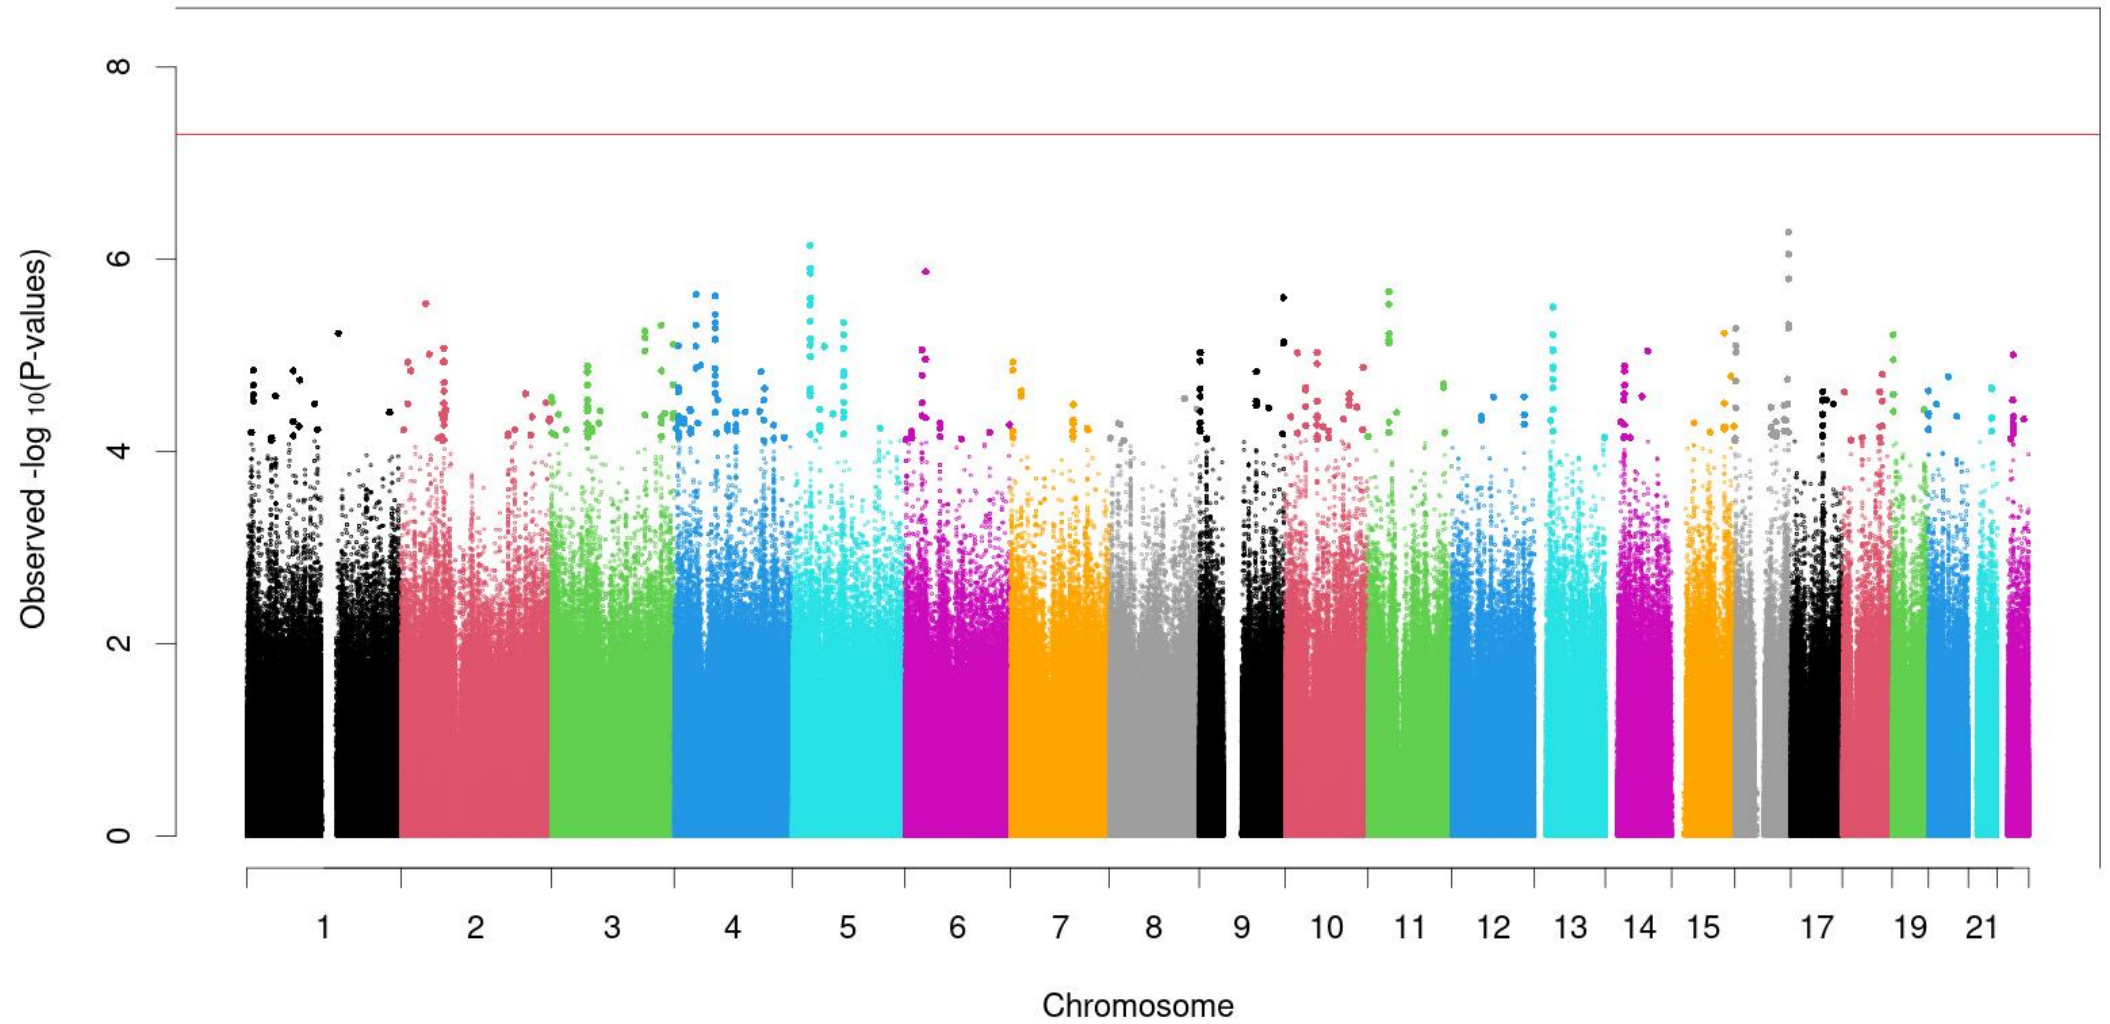

Manhattan plot for mz281.2493\_t256.8, elaidic acid

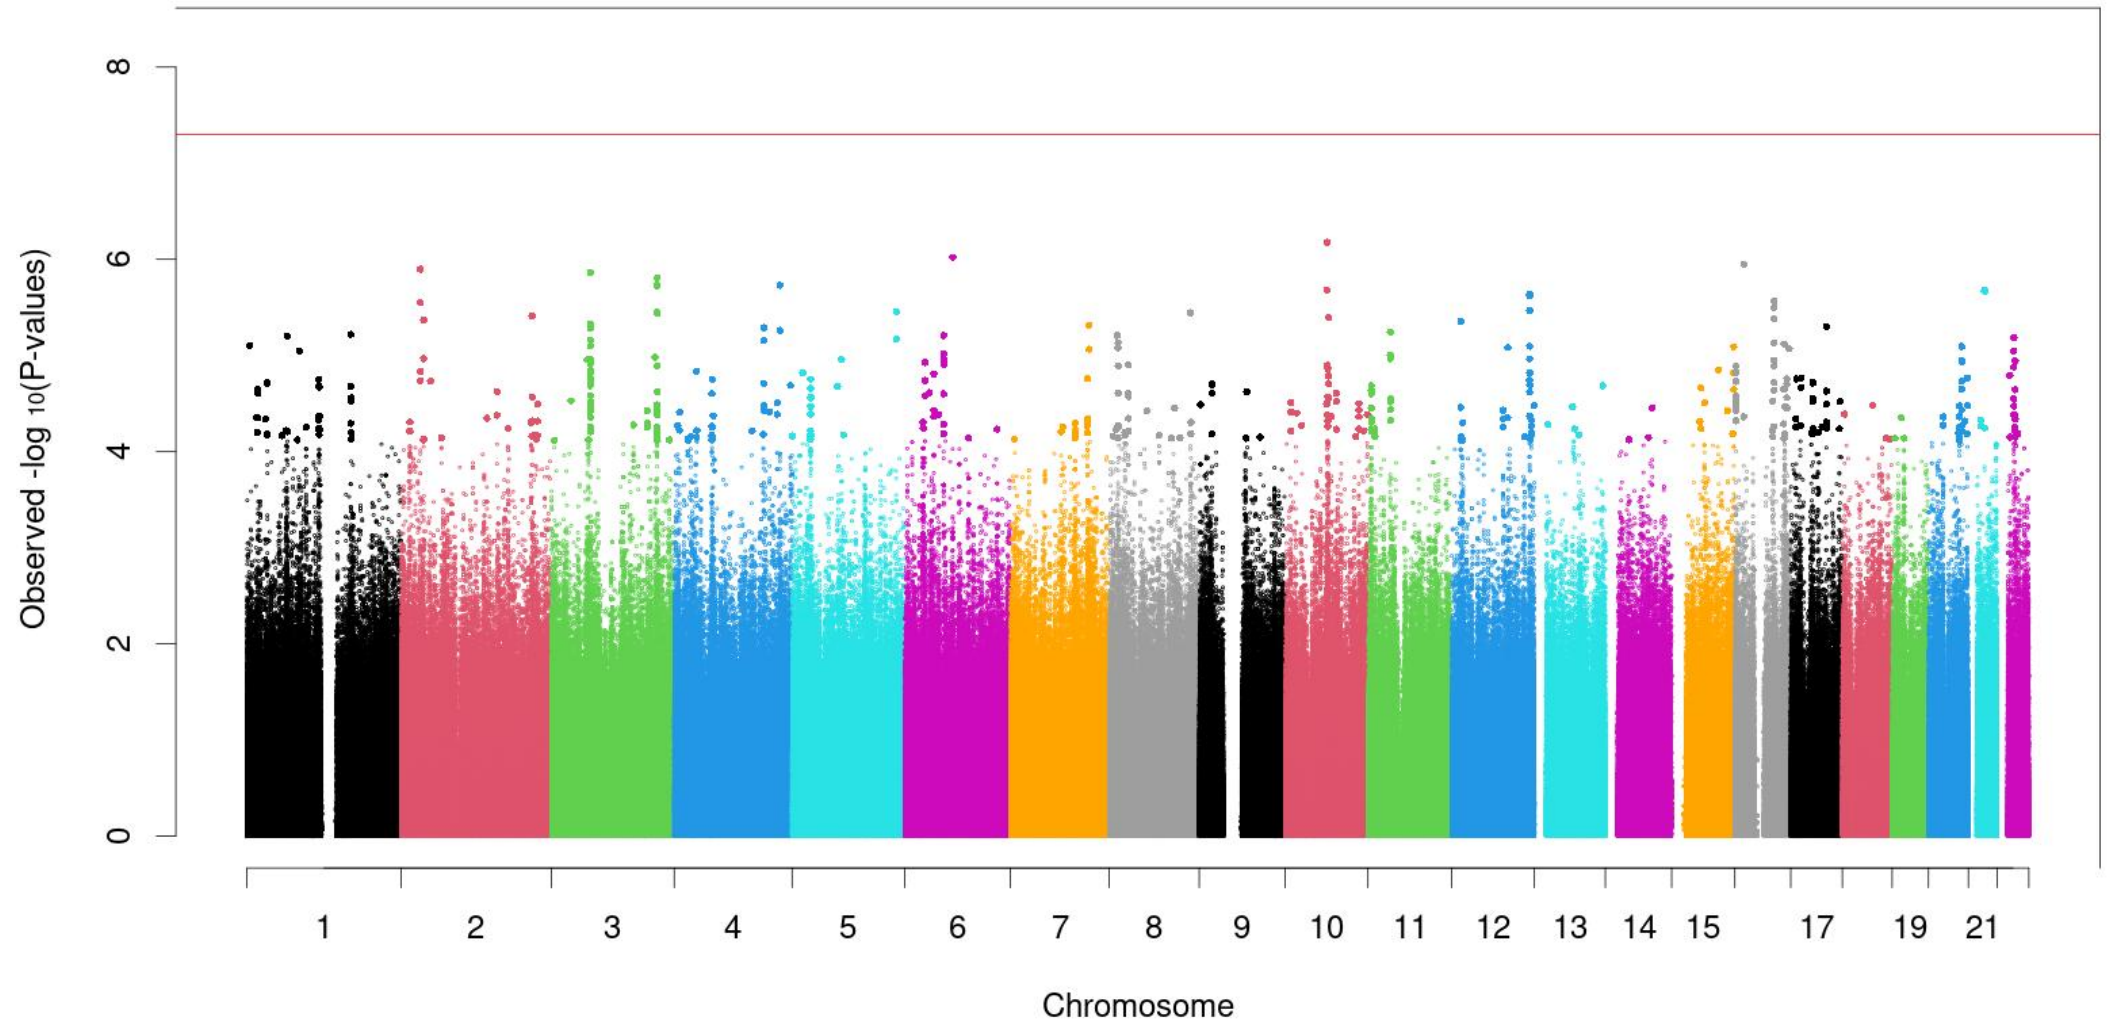



Manhattan plot for mz283.265\_t282.7, stearate

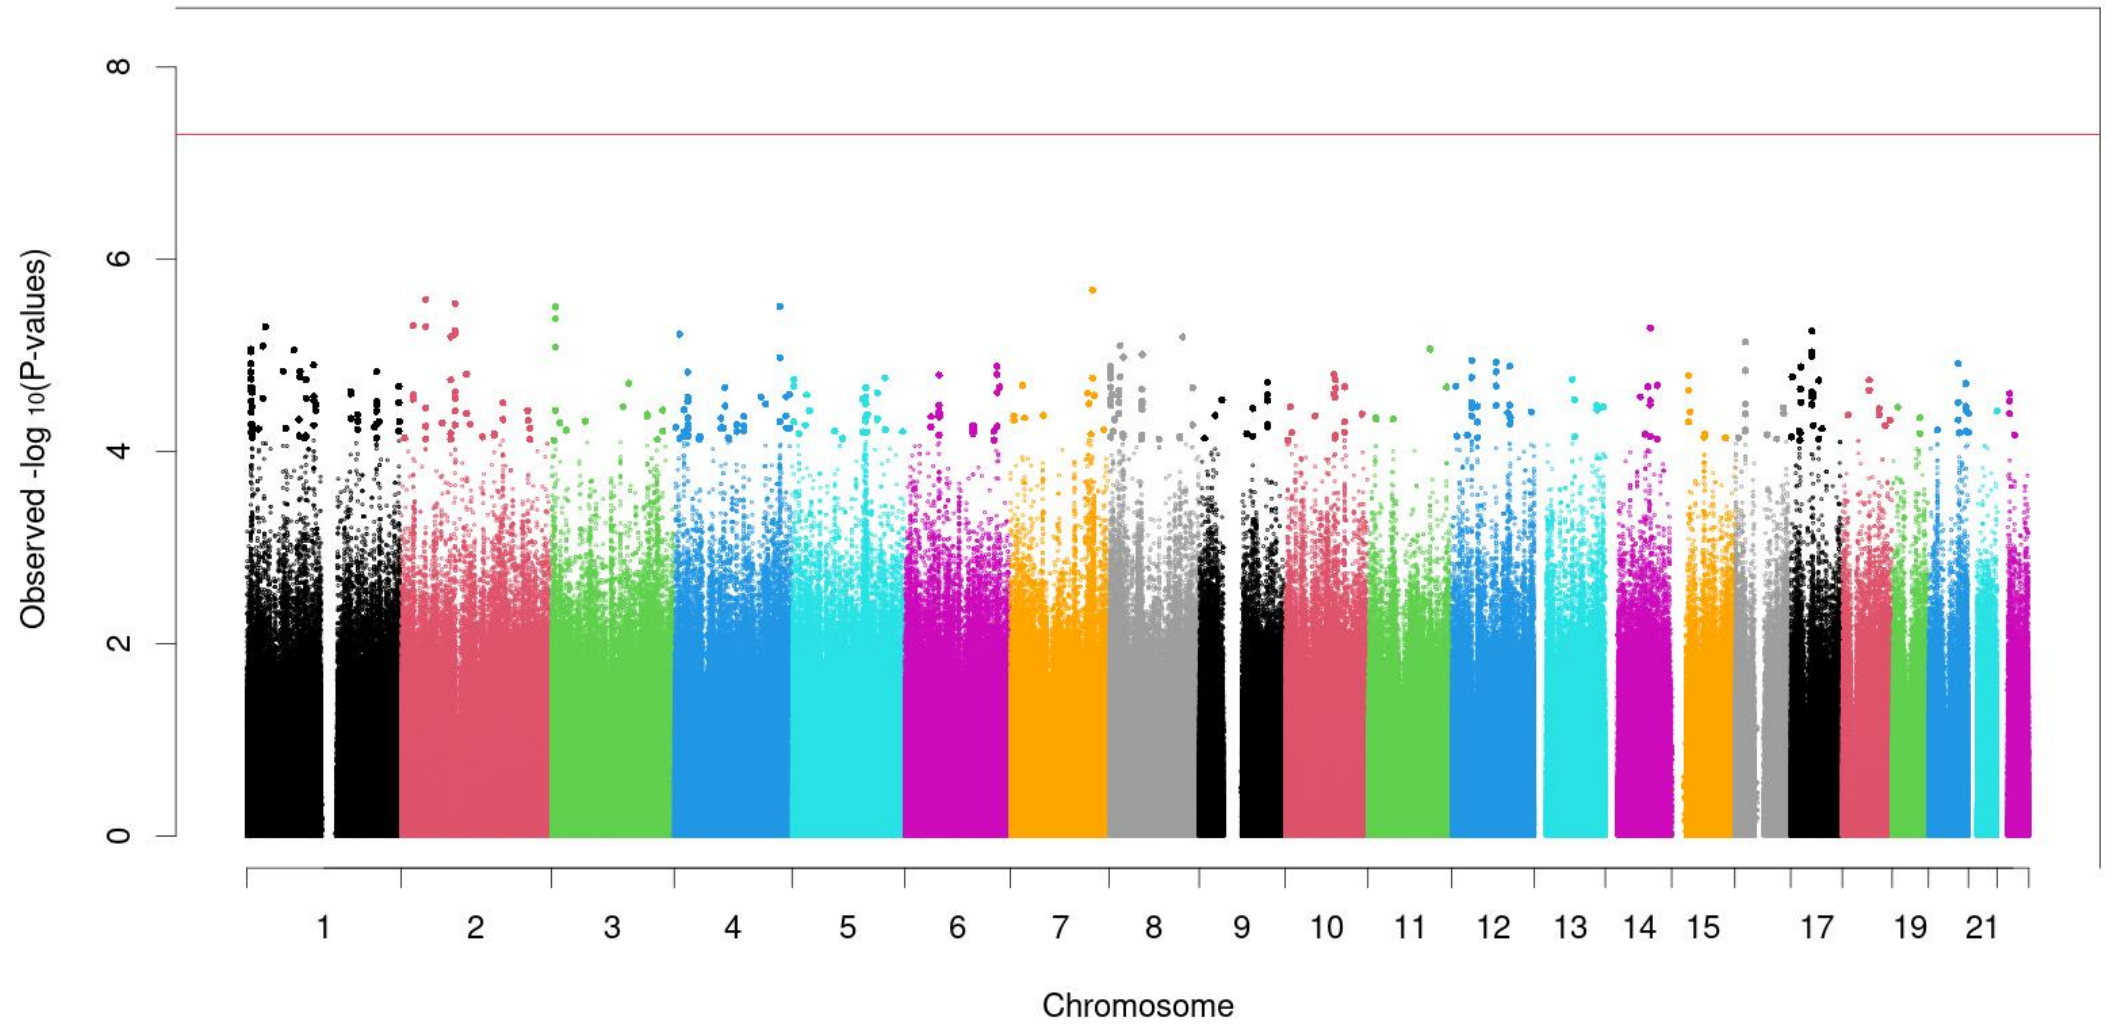

Manhattan plot for mz301.239\_t252, rac-glycerol 1-myristate

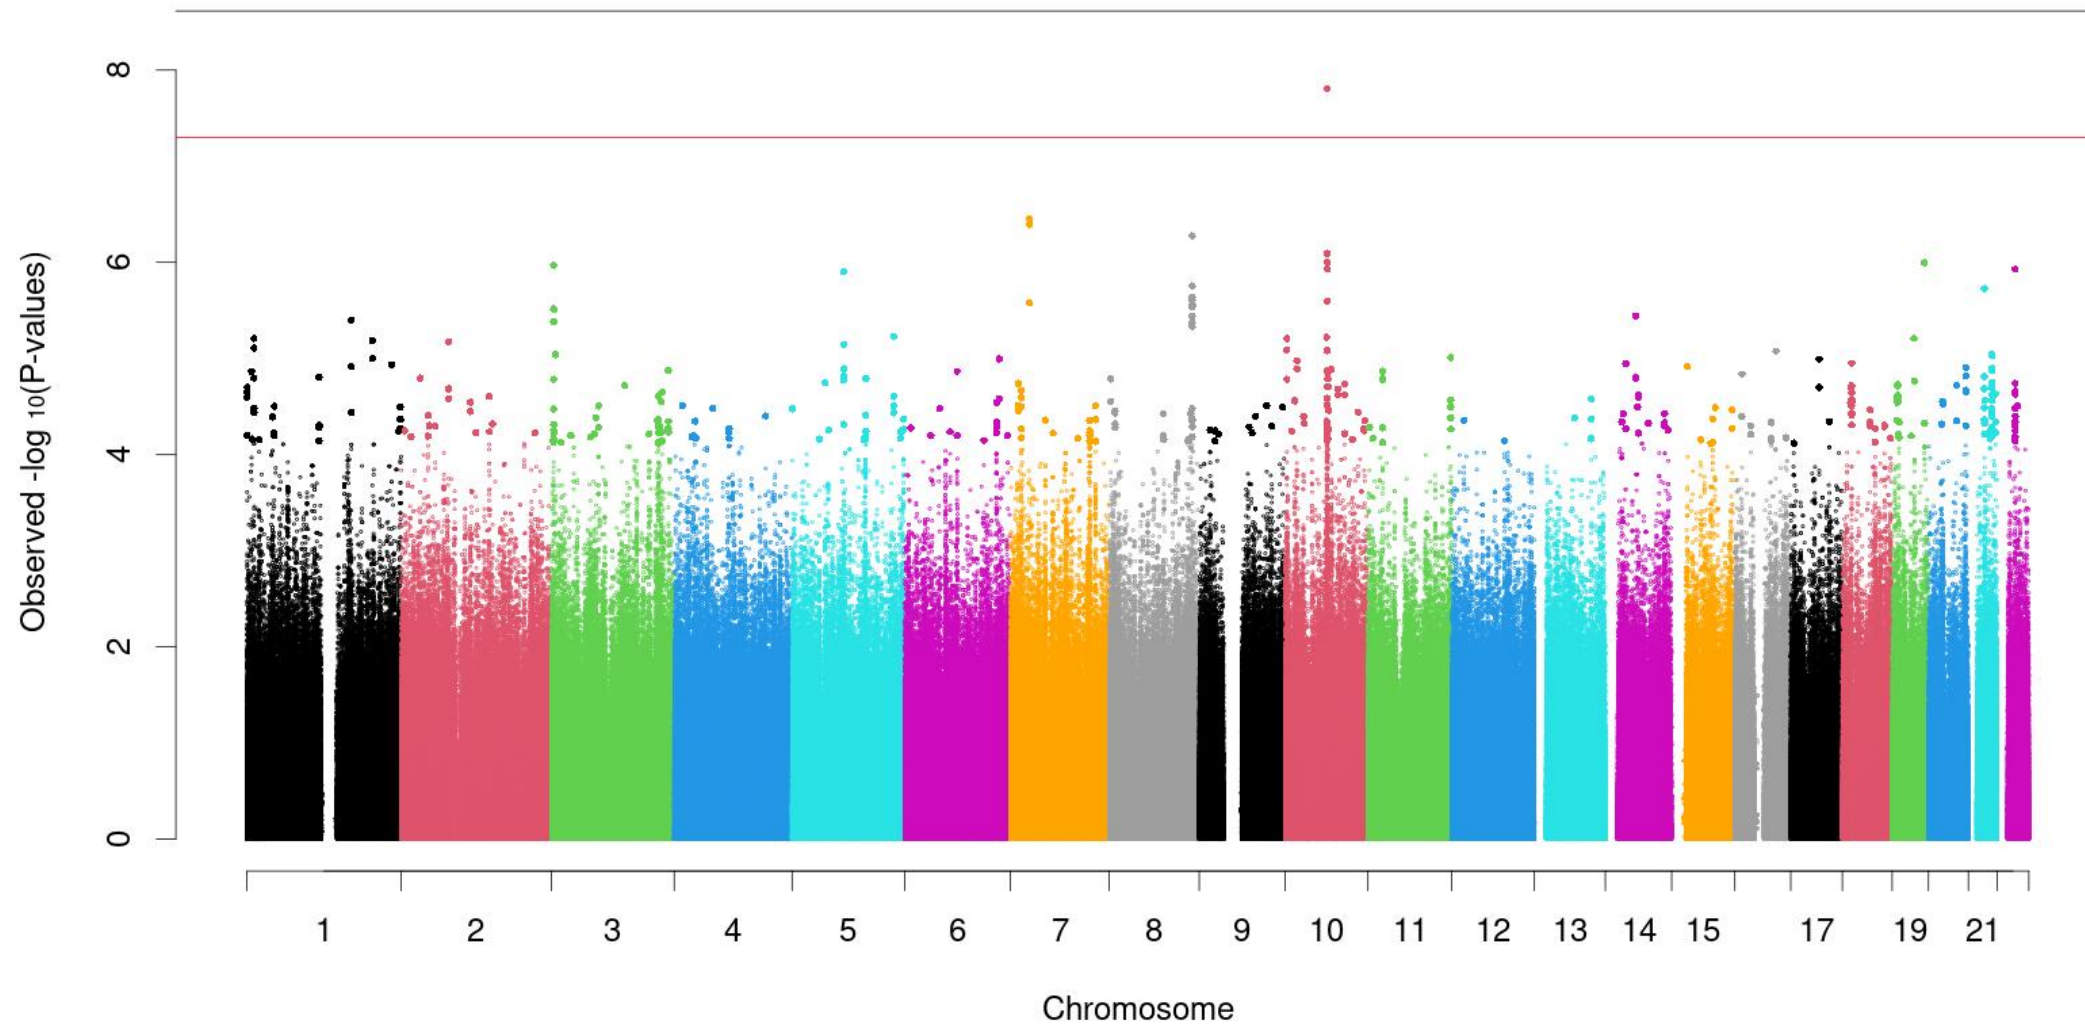

Manhattan plot for mz301.2167\_t26.6, retinoate

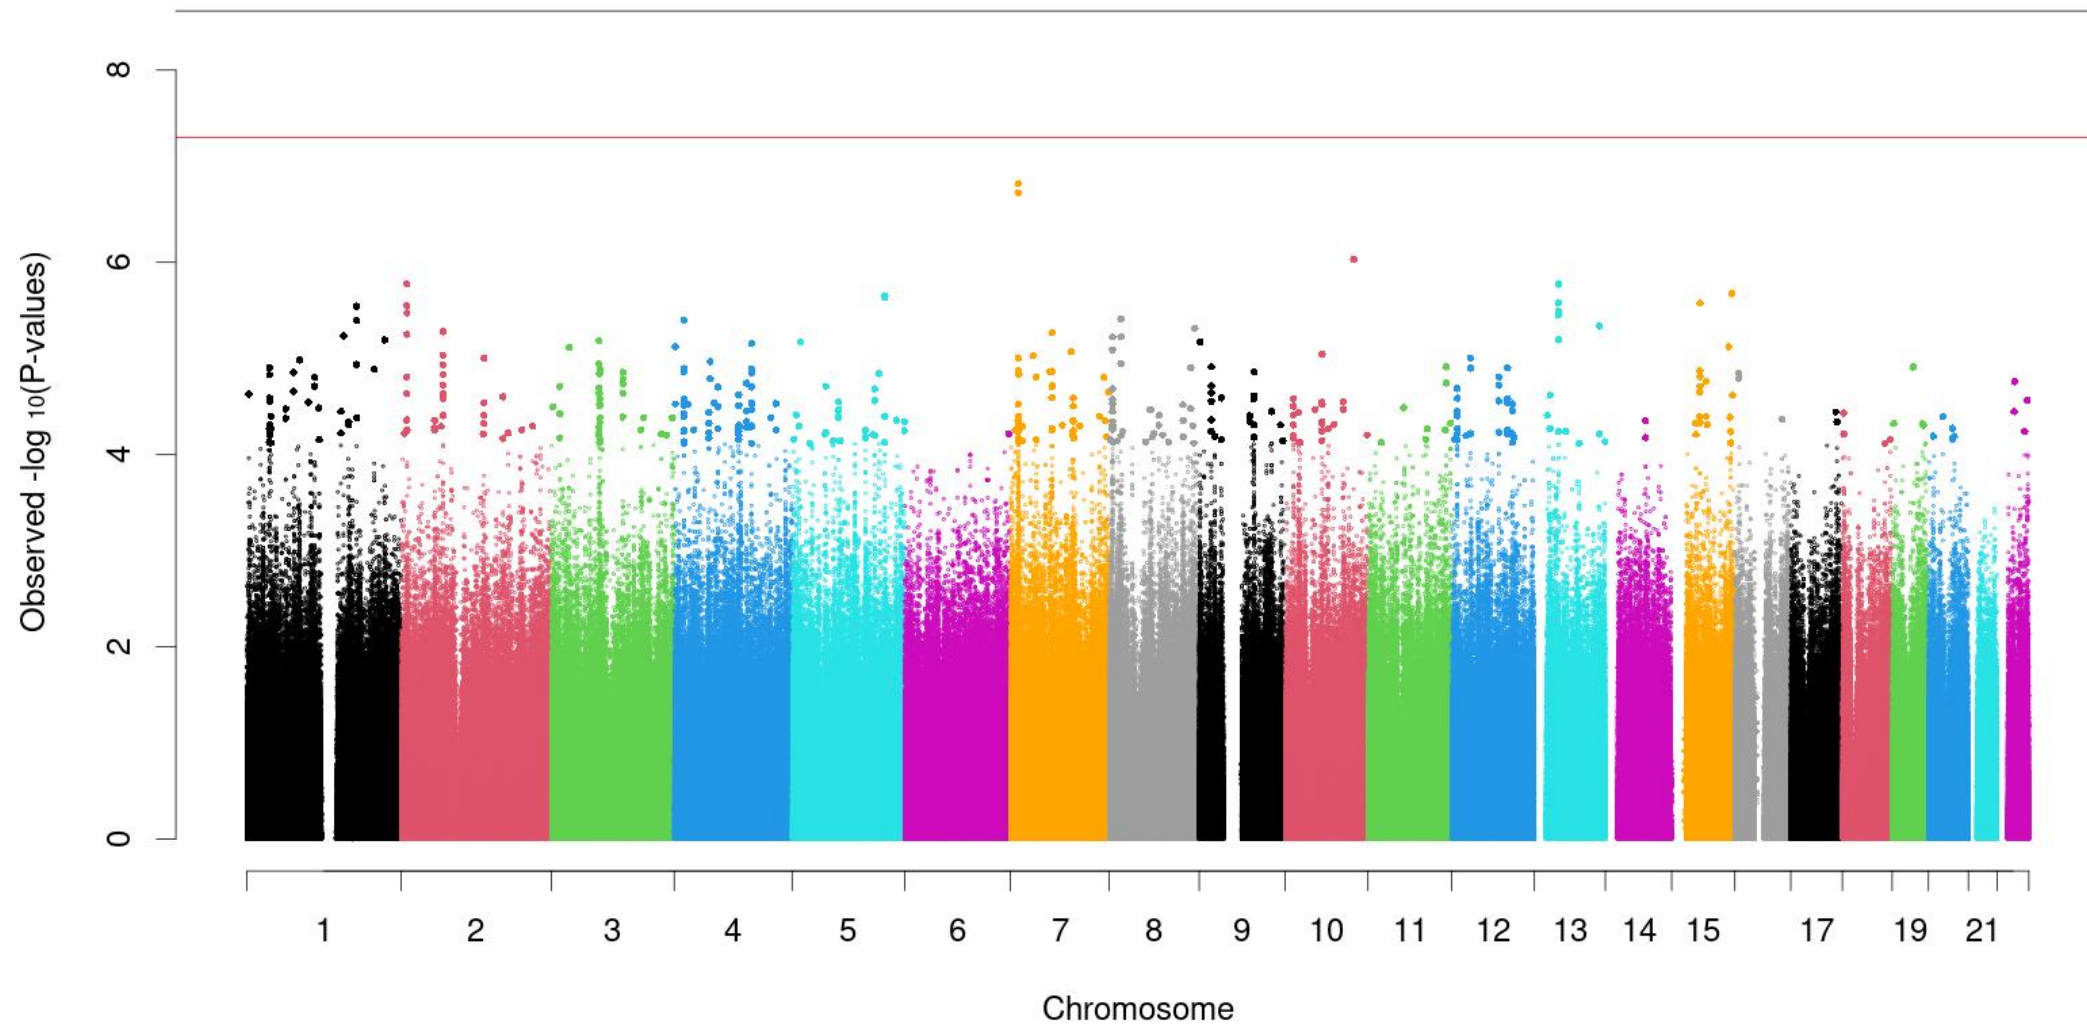



Manhattan plot for mz302.3054\_t35.1, sphinganine

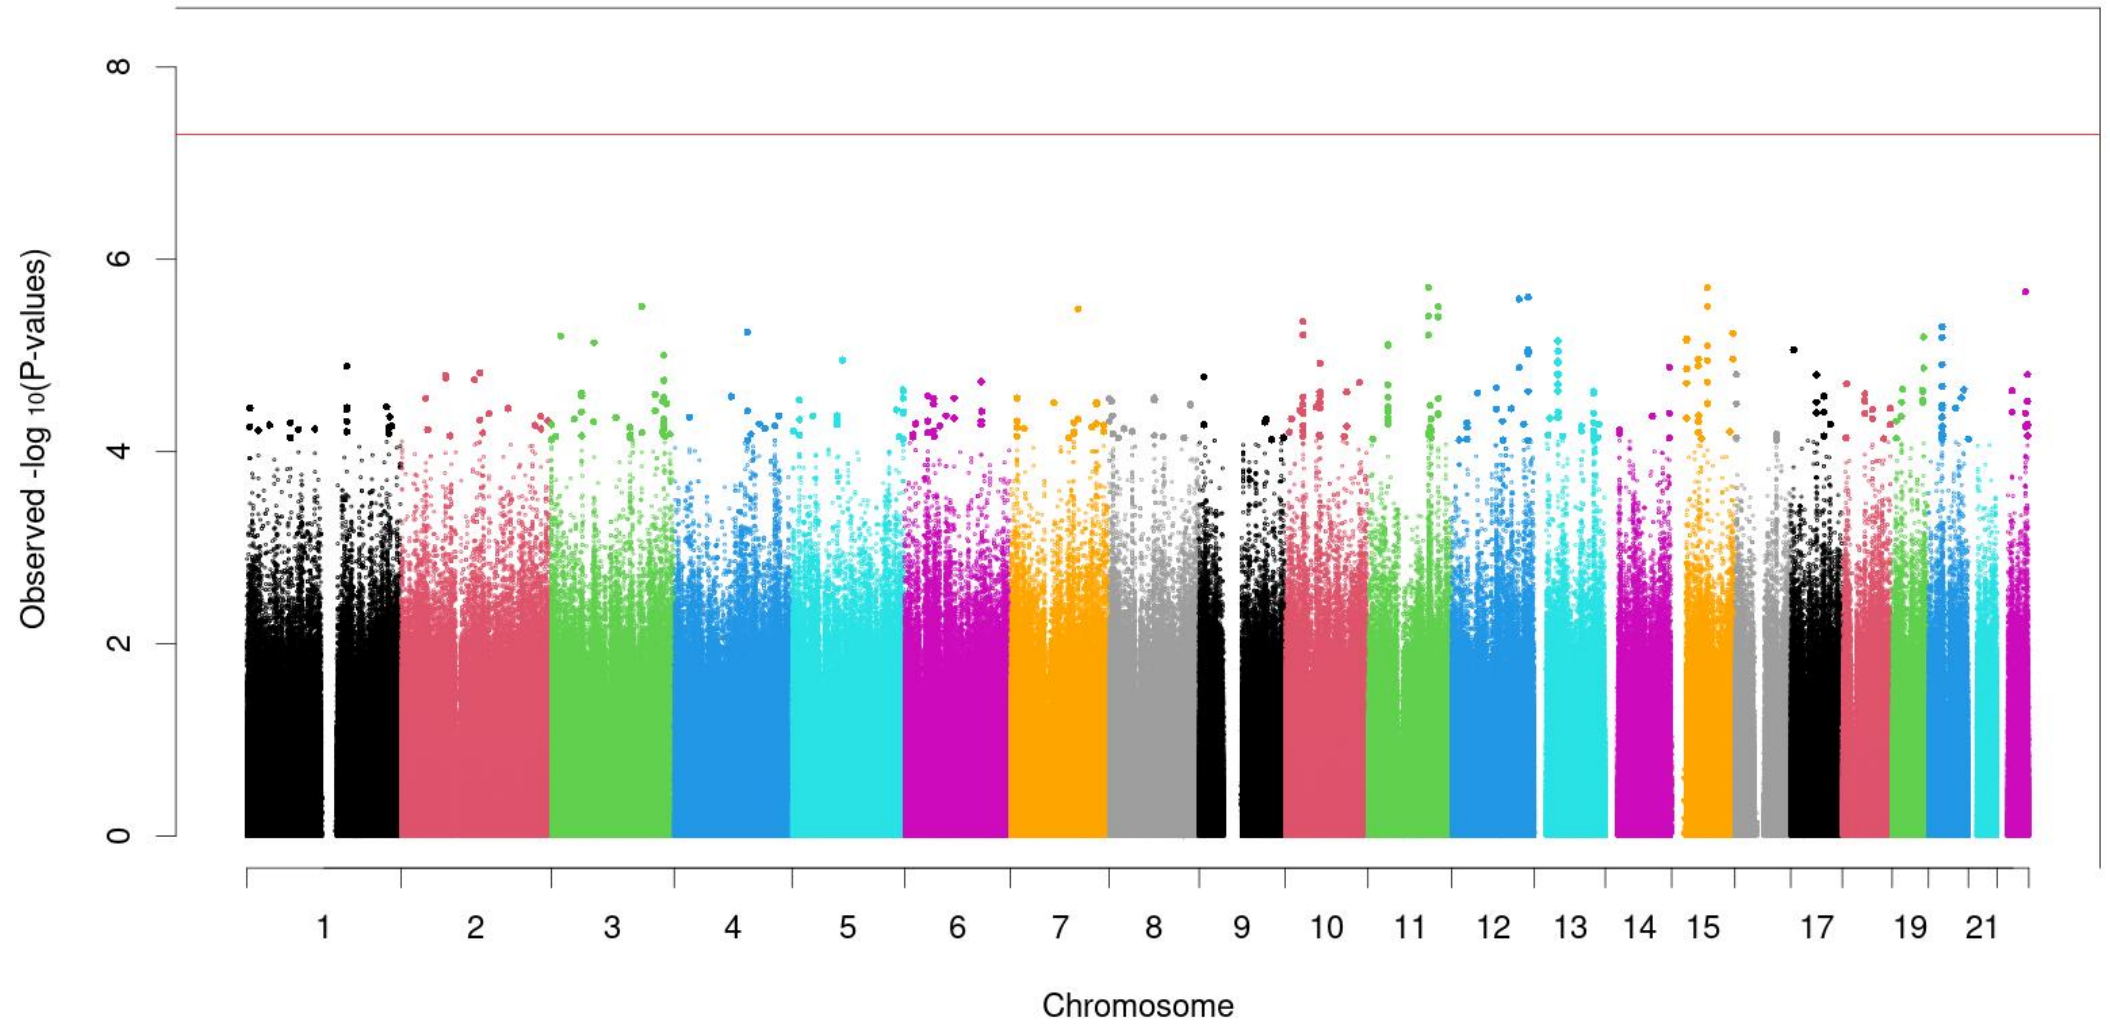

Manhattan plot for mz307.0316\_t28.5, 2'-deoxyuridine 5'-mono-phosphate

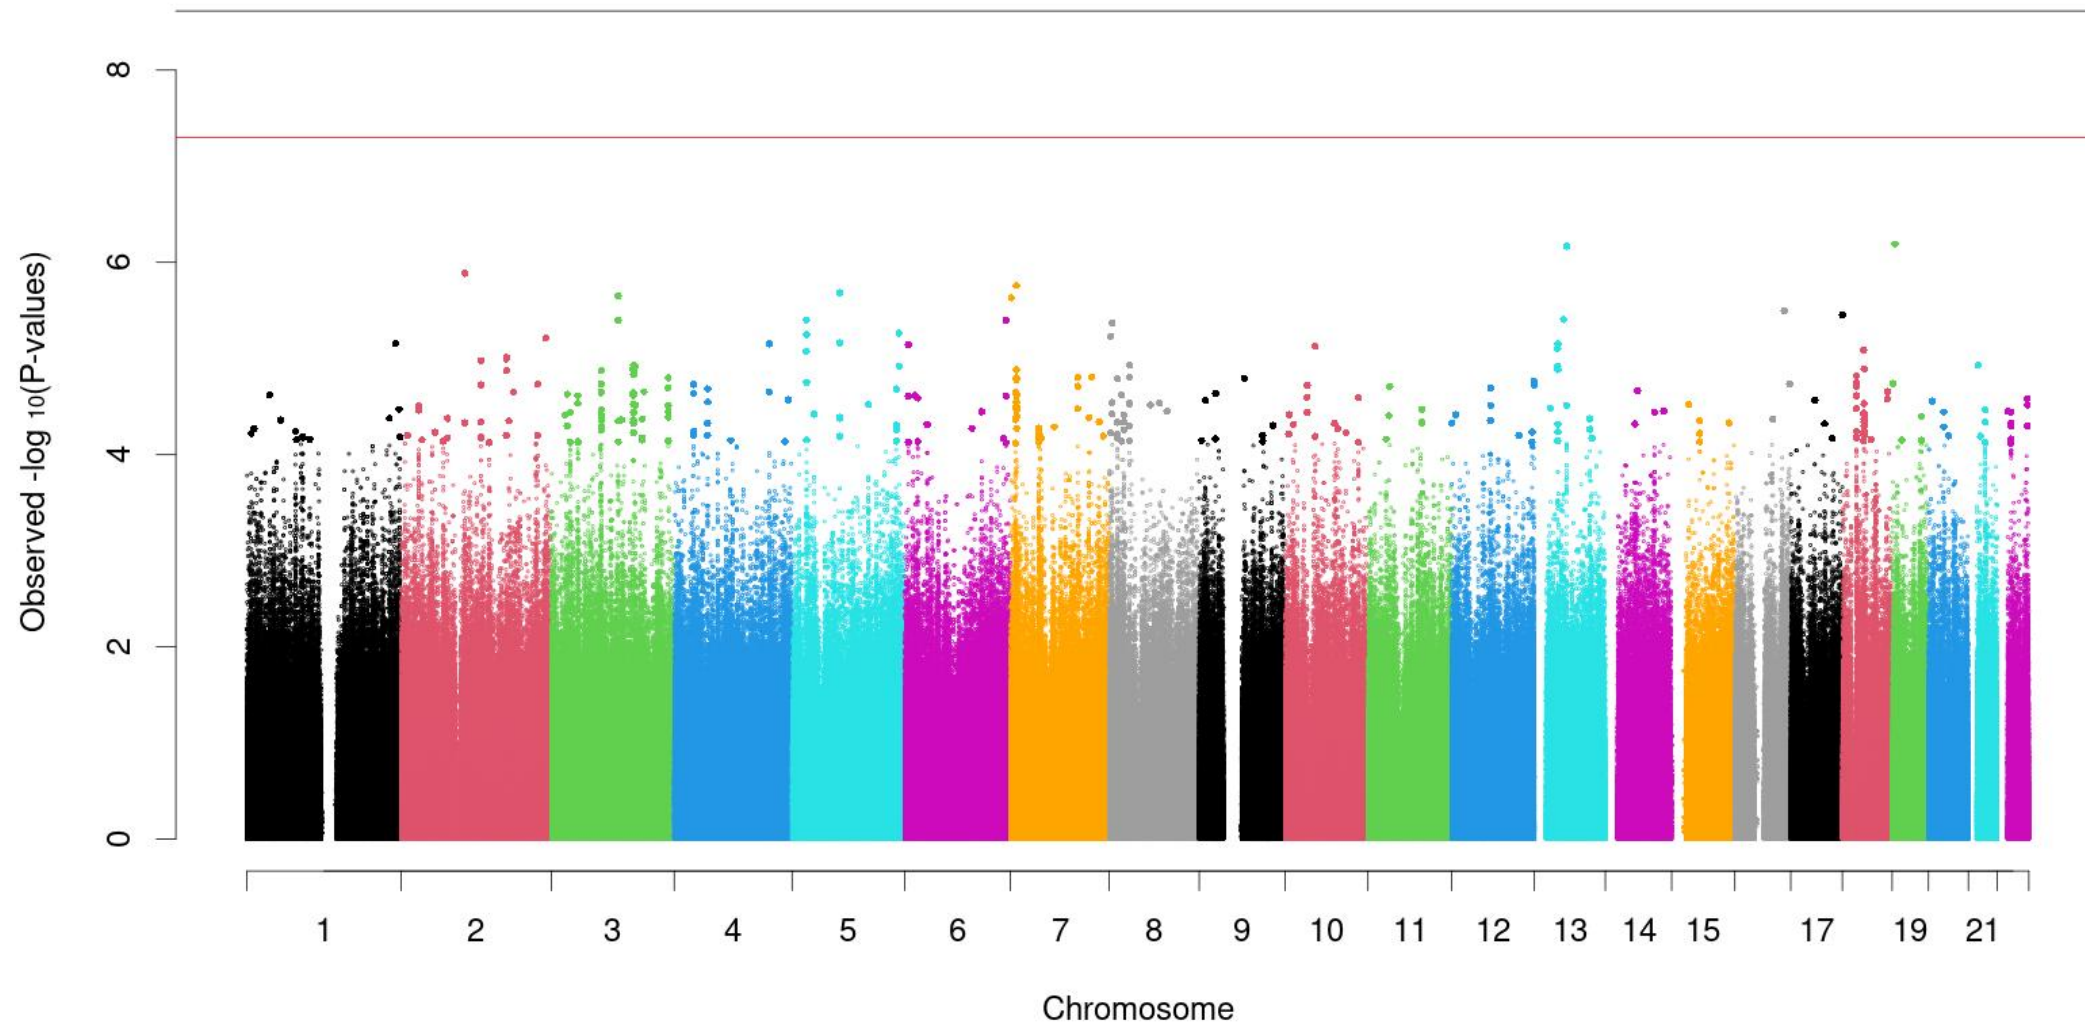

Manhattan plot for mz308.1\_t22.3, n-acetylneuraminate

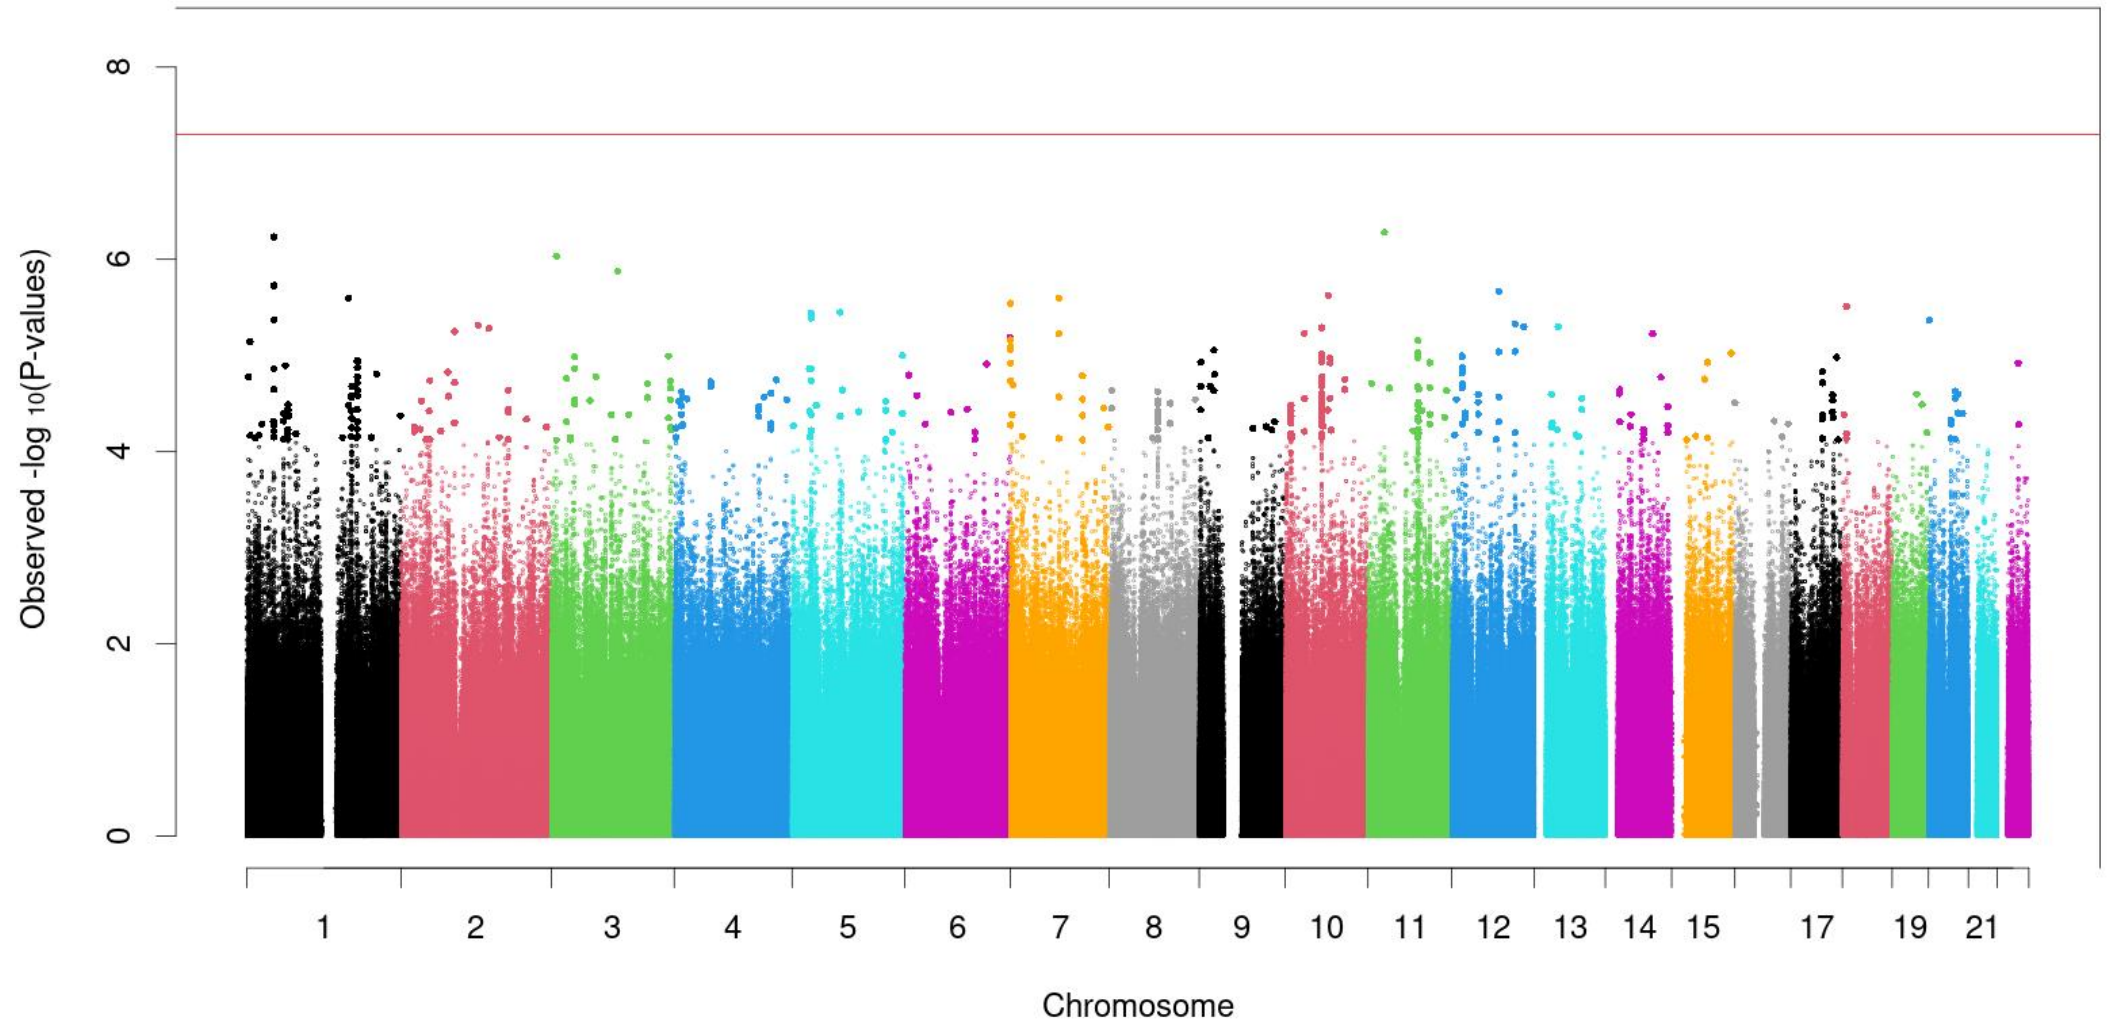



Manhattan plot for mz308.0929\_t55.3, glutathione

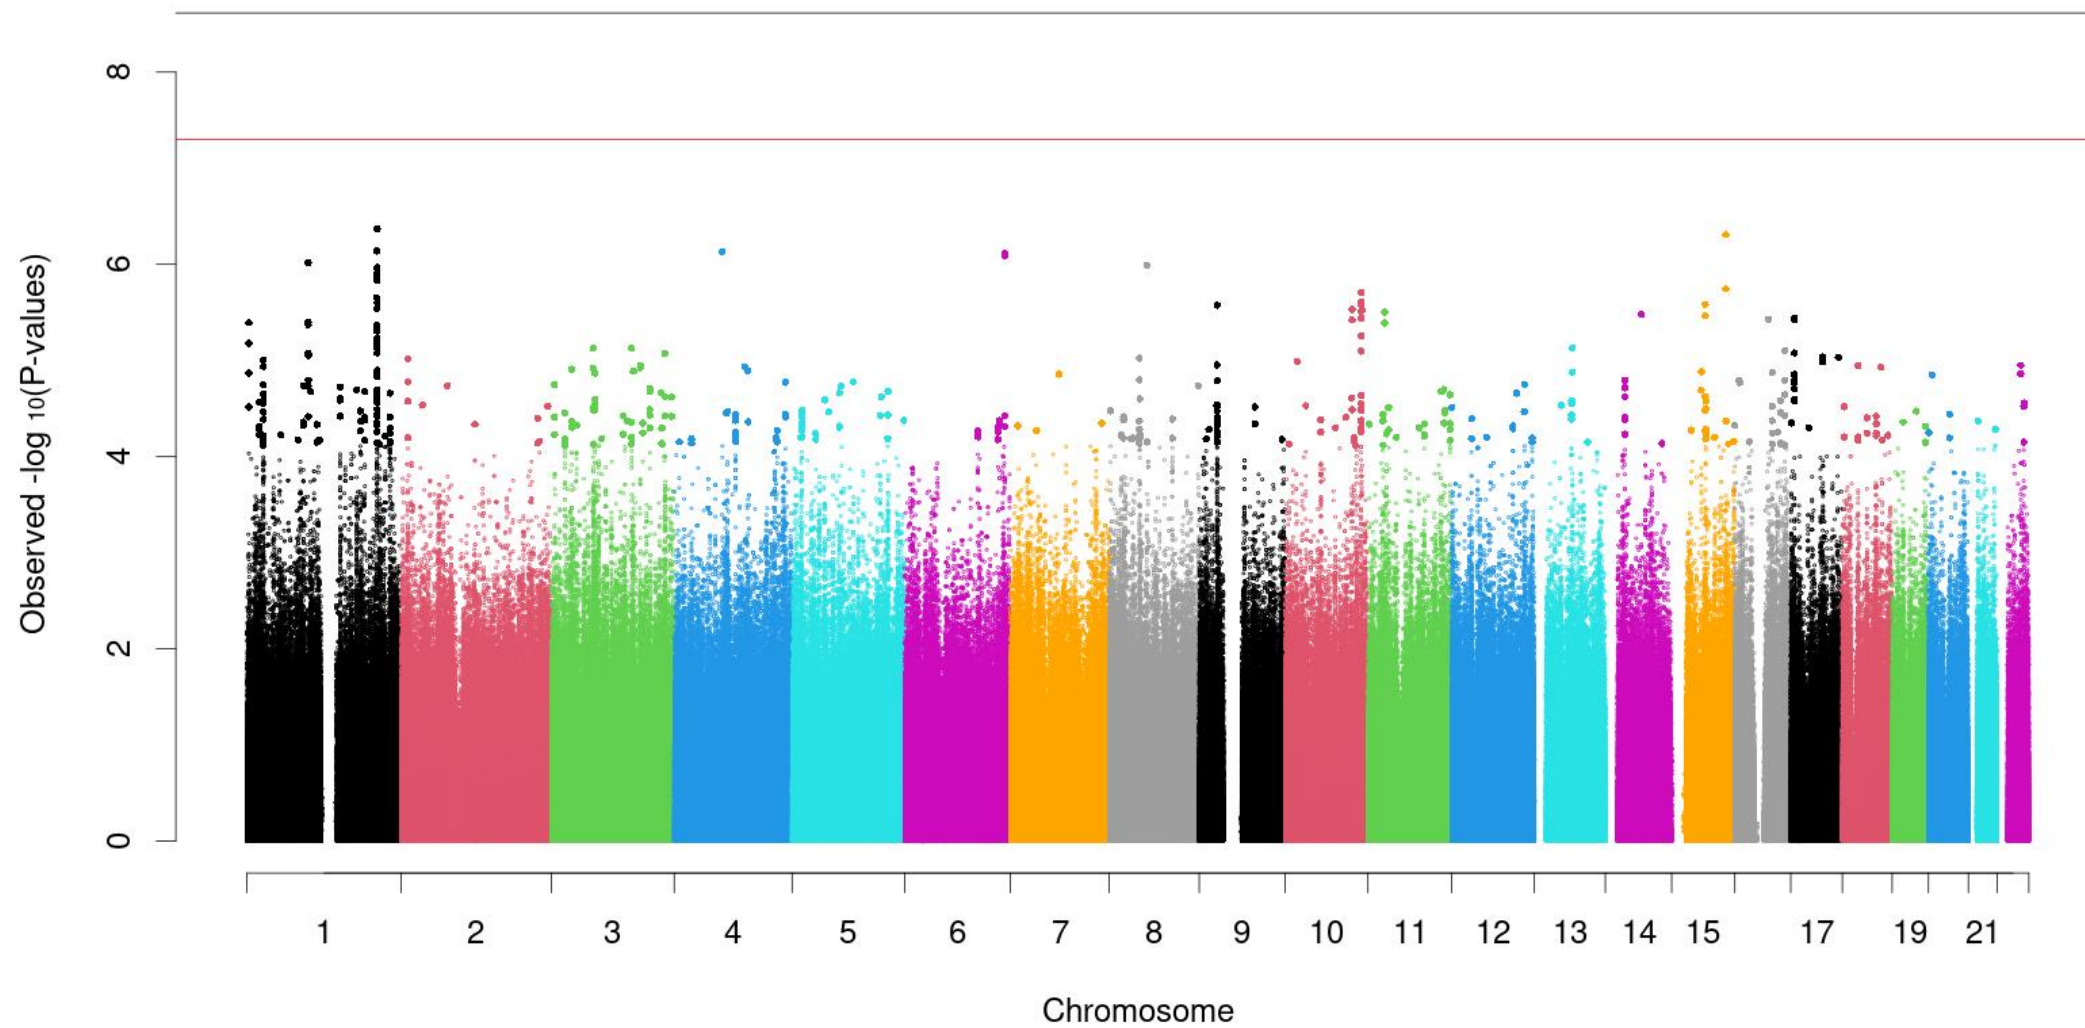

Manhattan plot for mz310.1137\_t48.2, n-acetylneuraminate

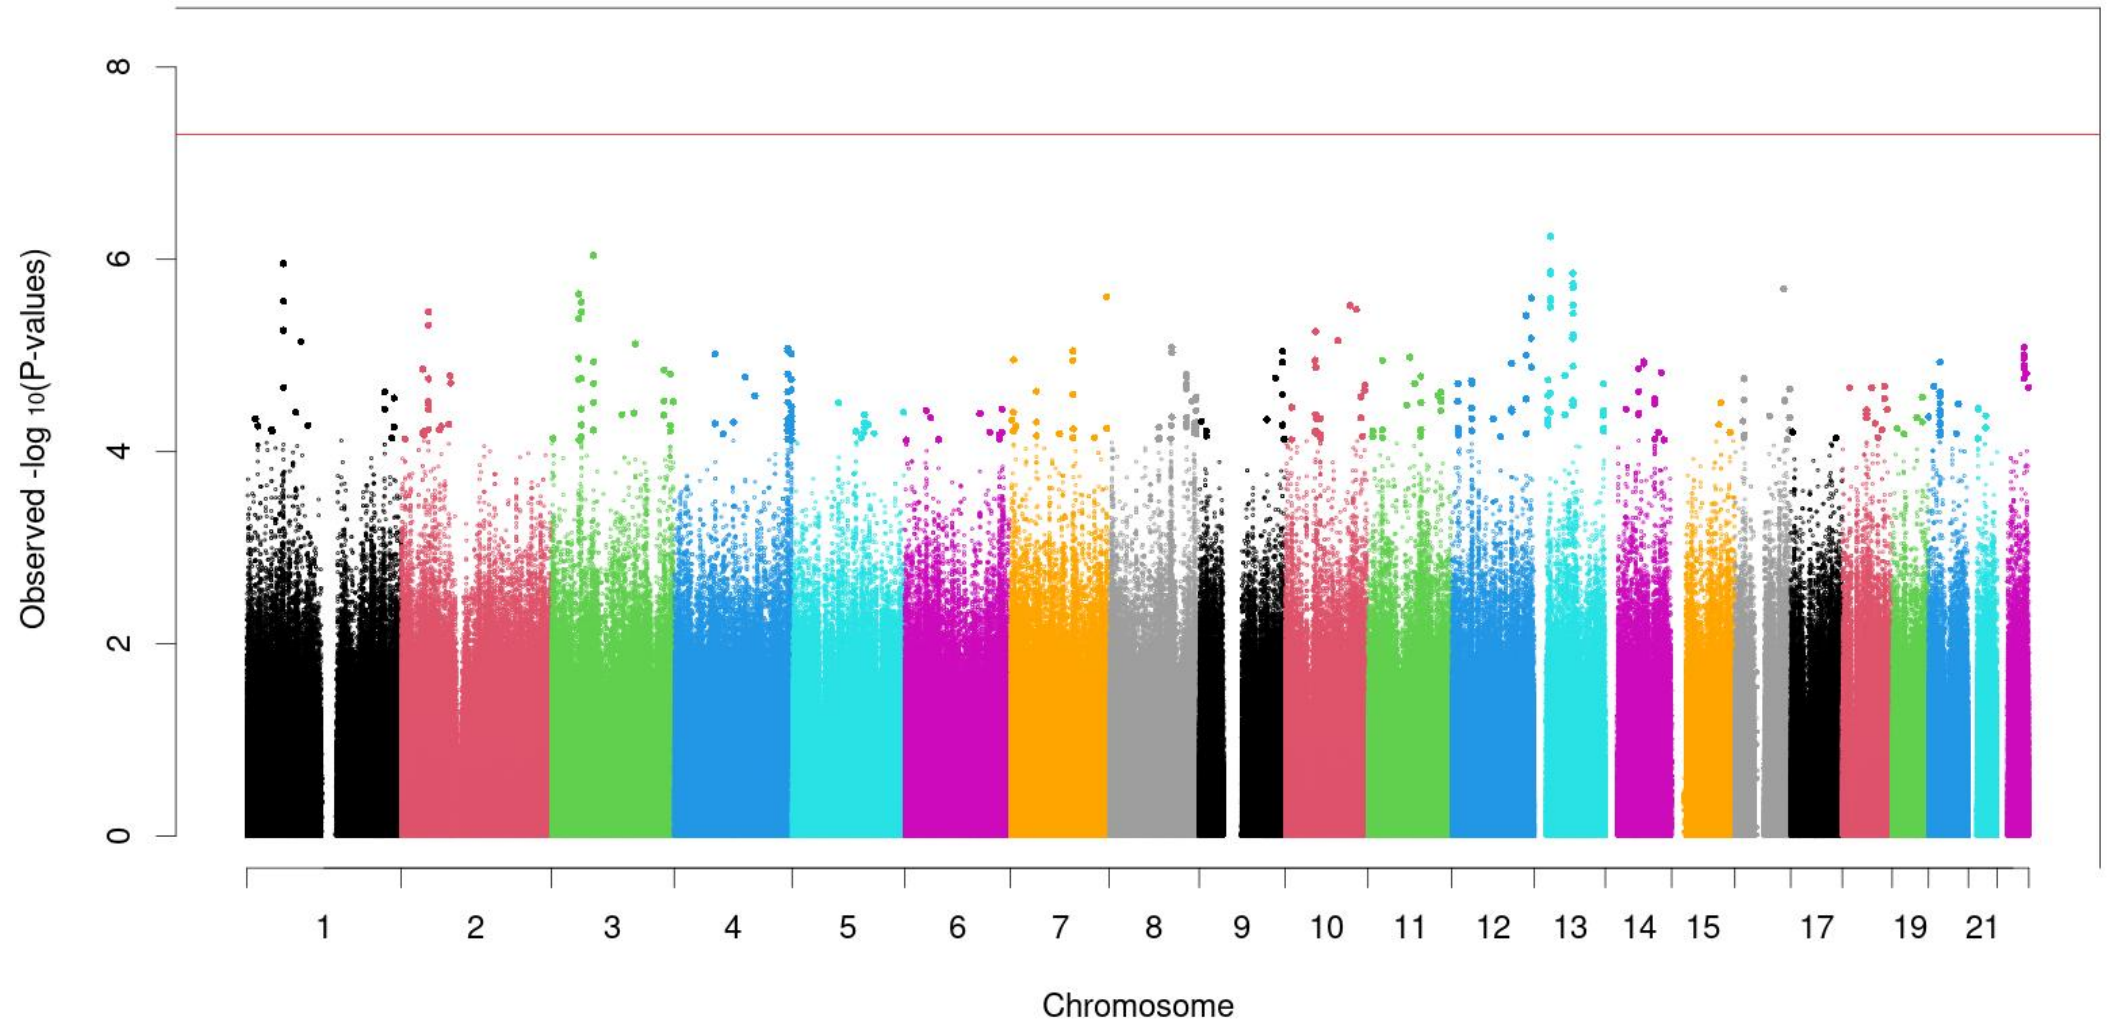

Manhattan plot for mz311.296\_t295.2, arachidic acid

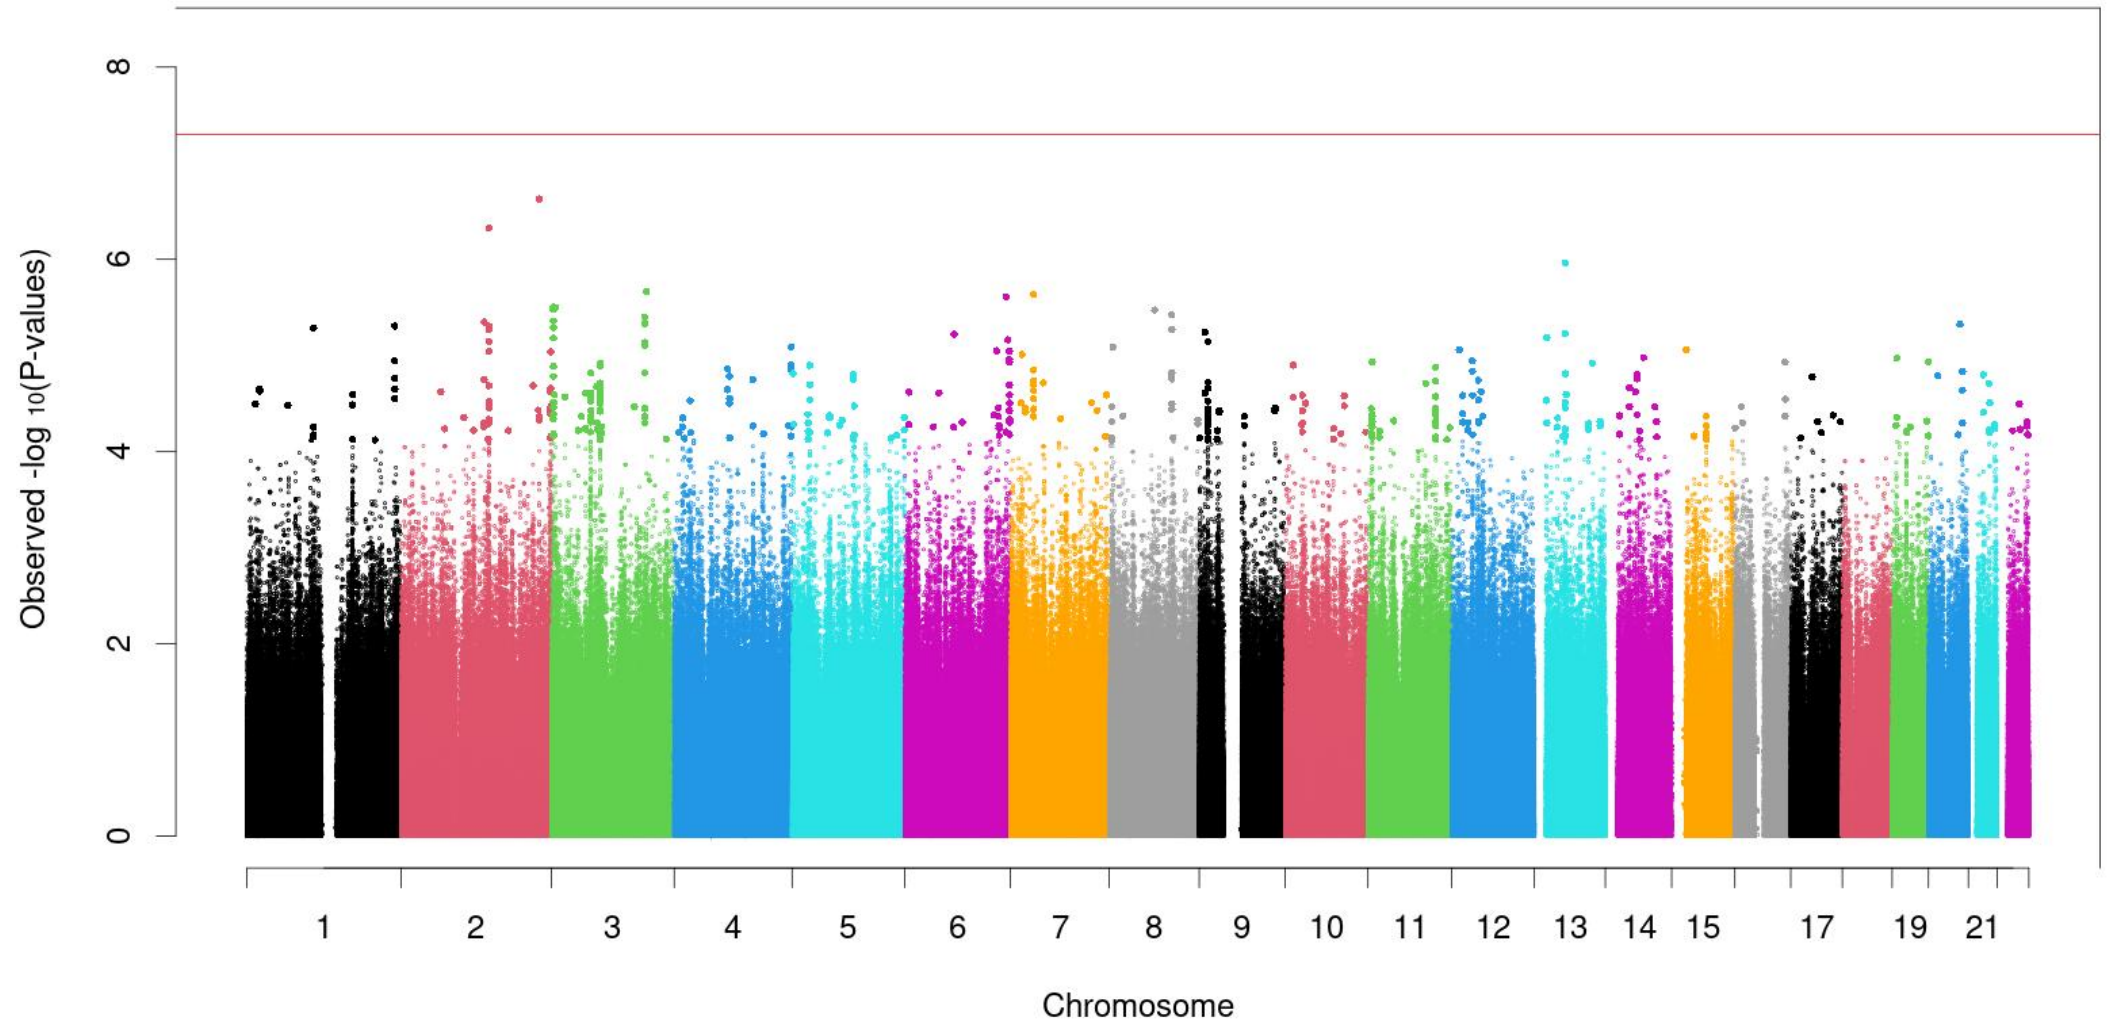



Manhattan plot for mz319.0692\_t48.2, melanin

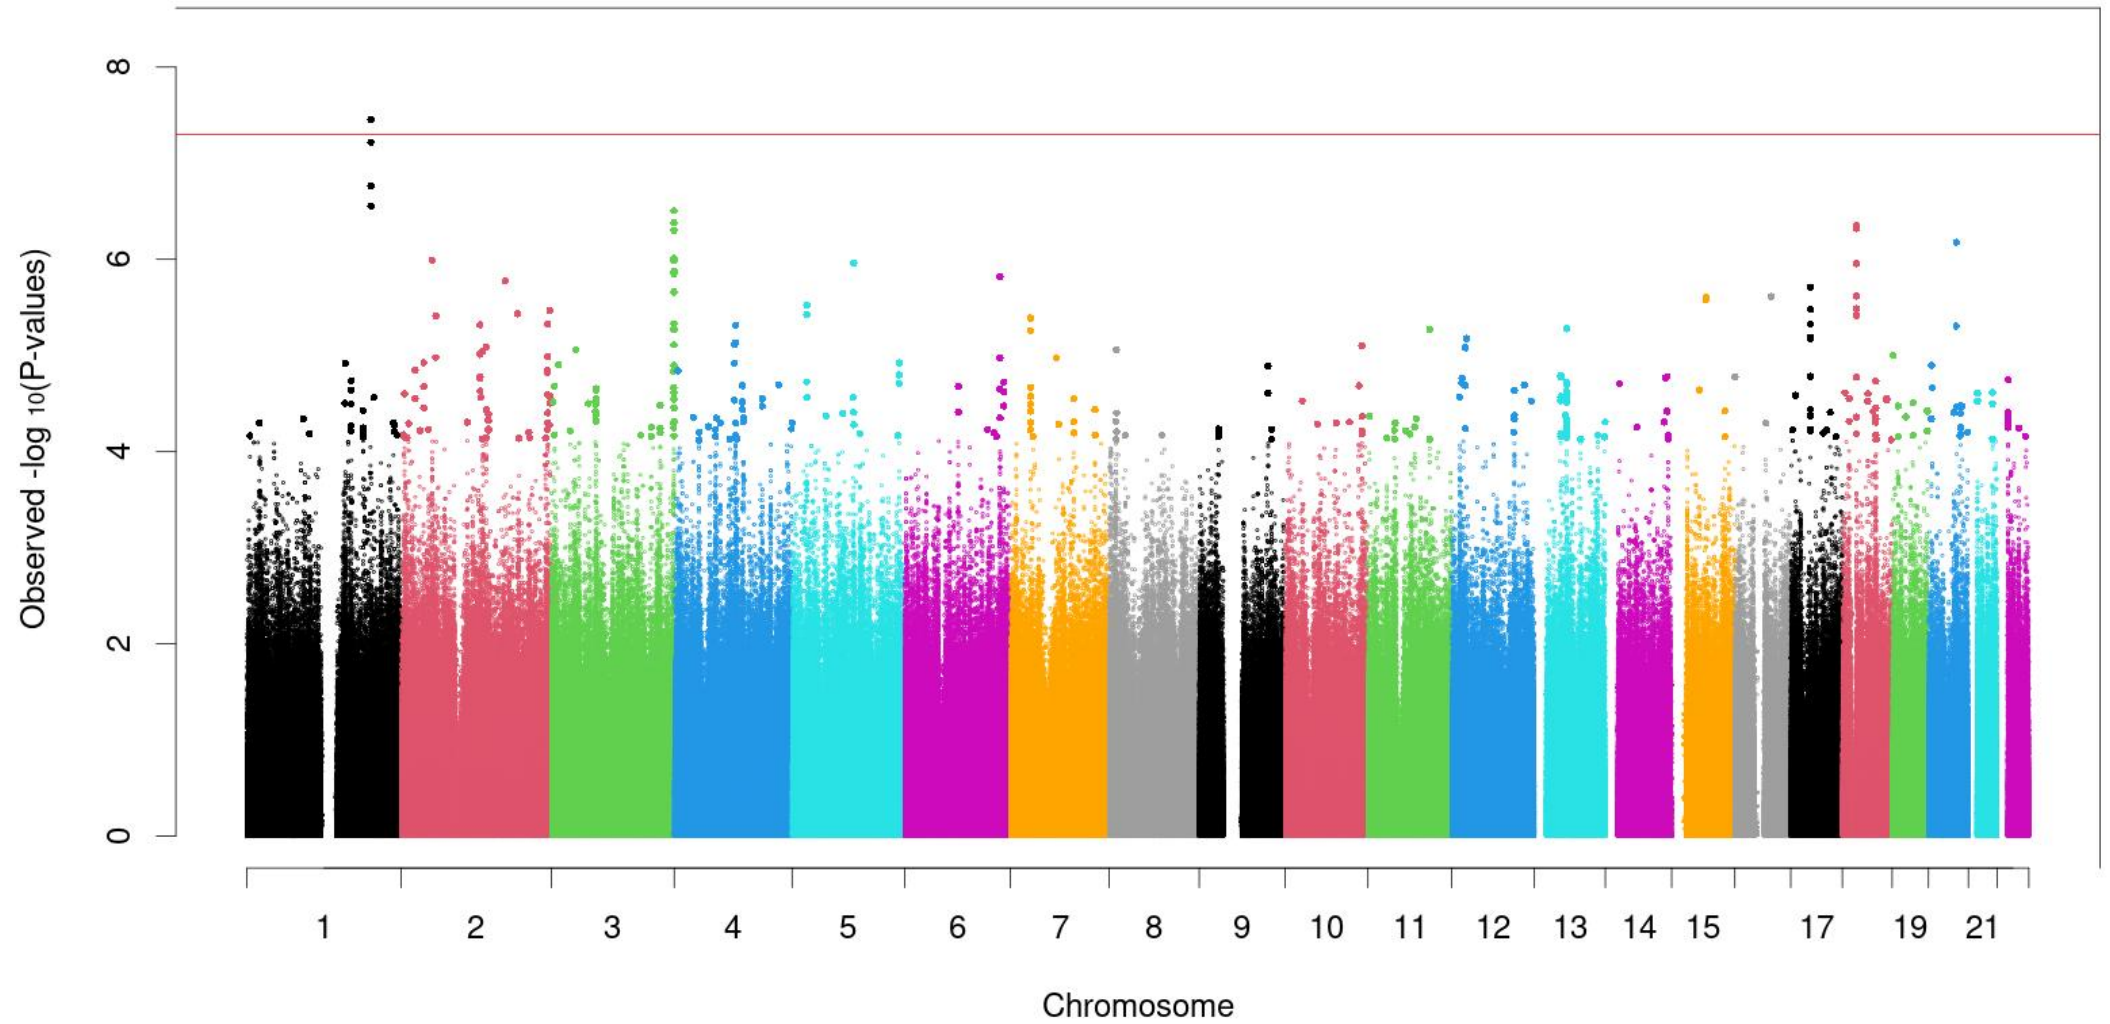

Manhattan plot for mz329.2502\_t29.9, docosaheanoic acid

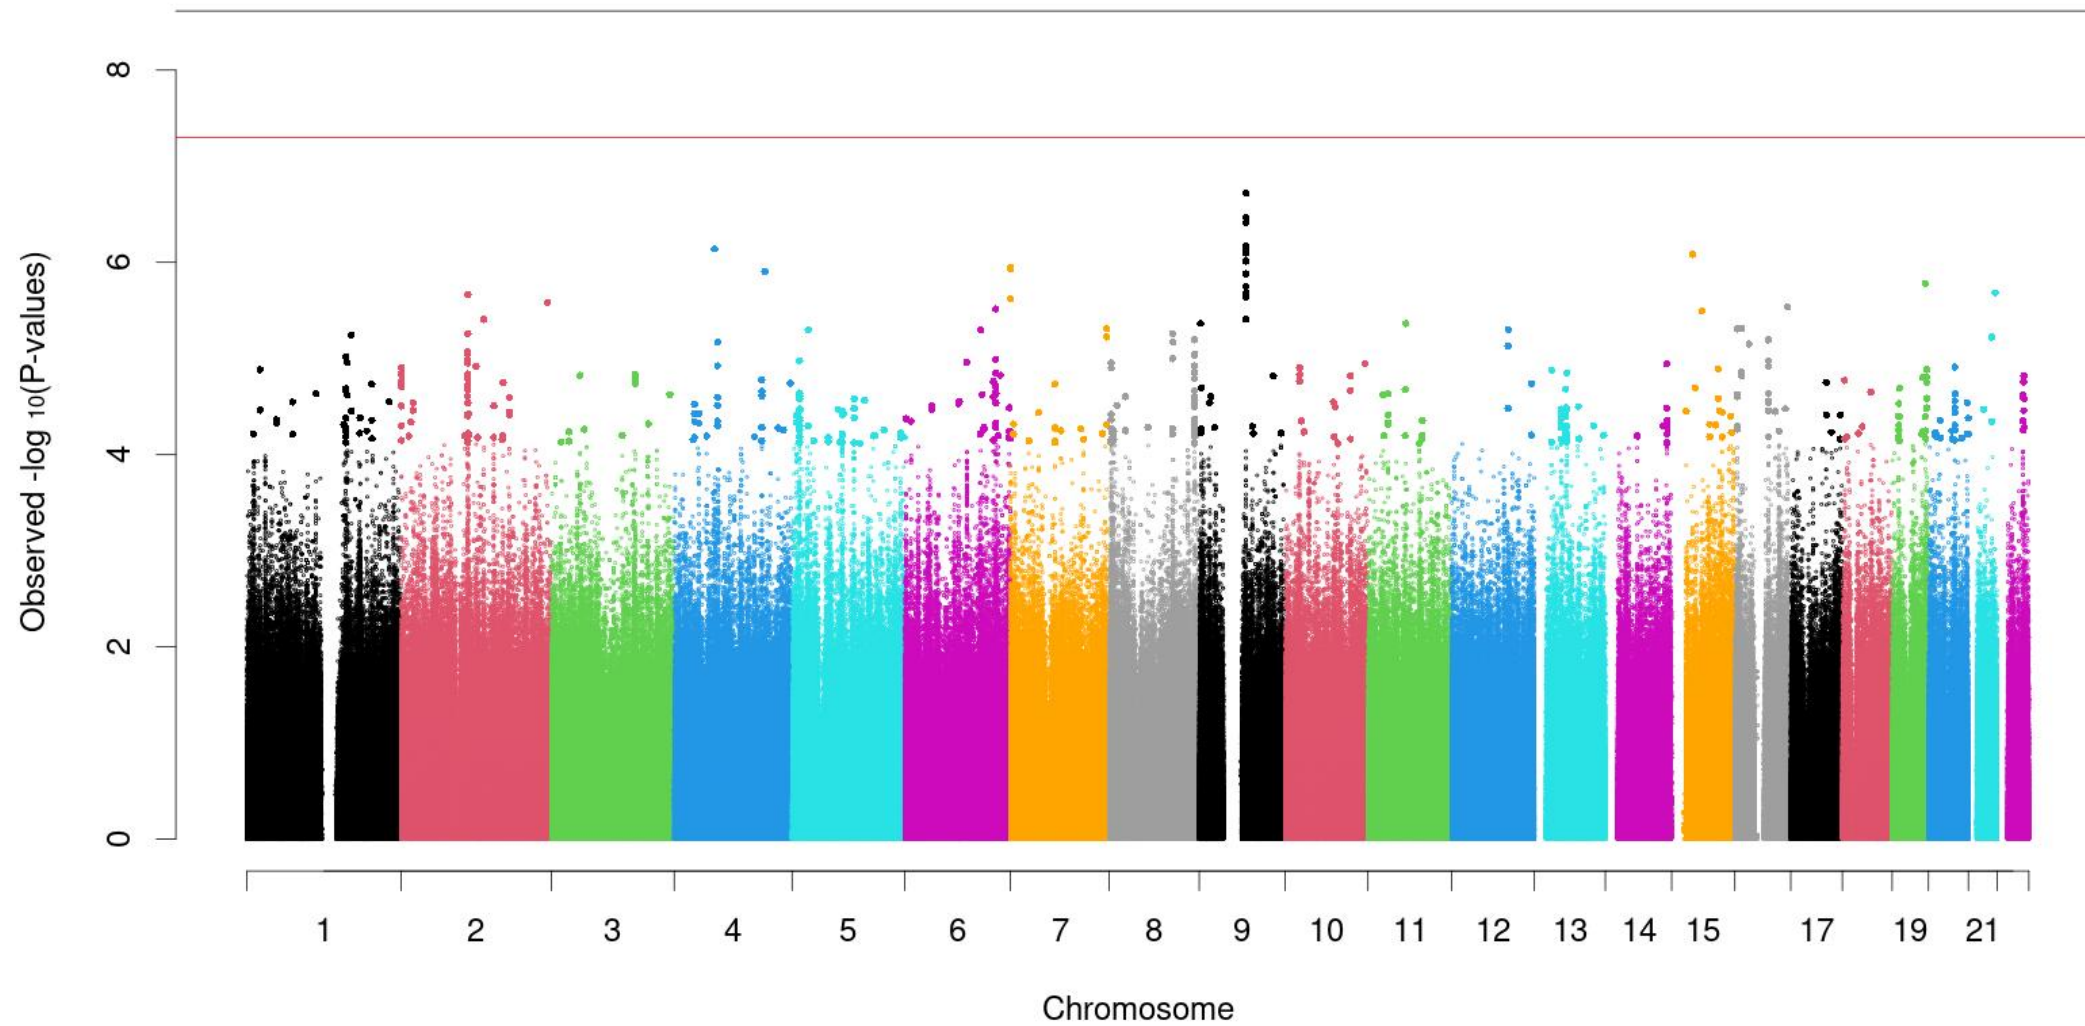

Manhattan plot for mz330.0603\_t50, adenosine 3,5-cyclic monophosphate

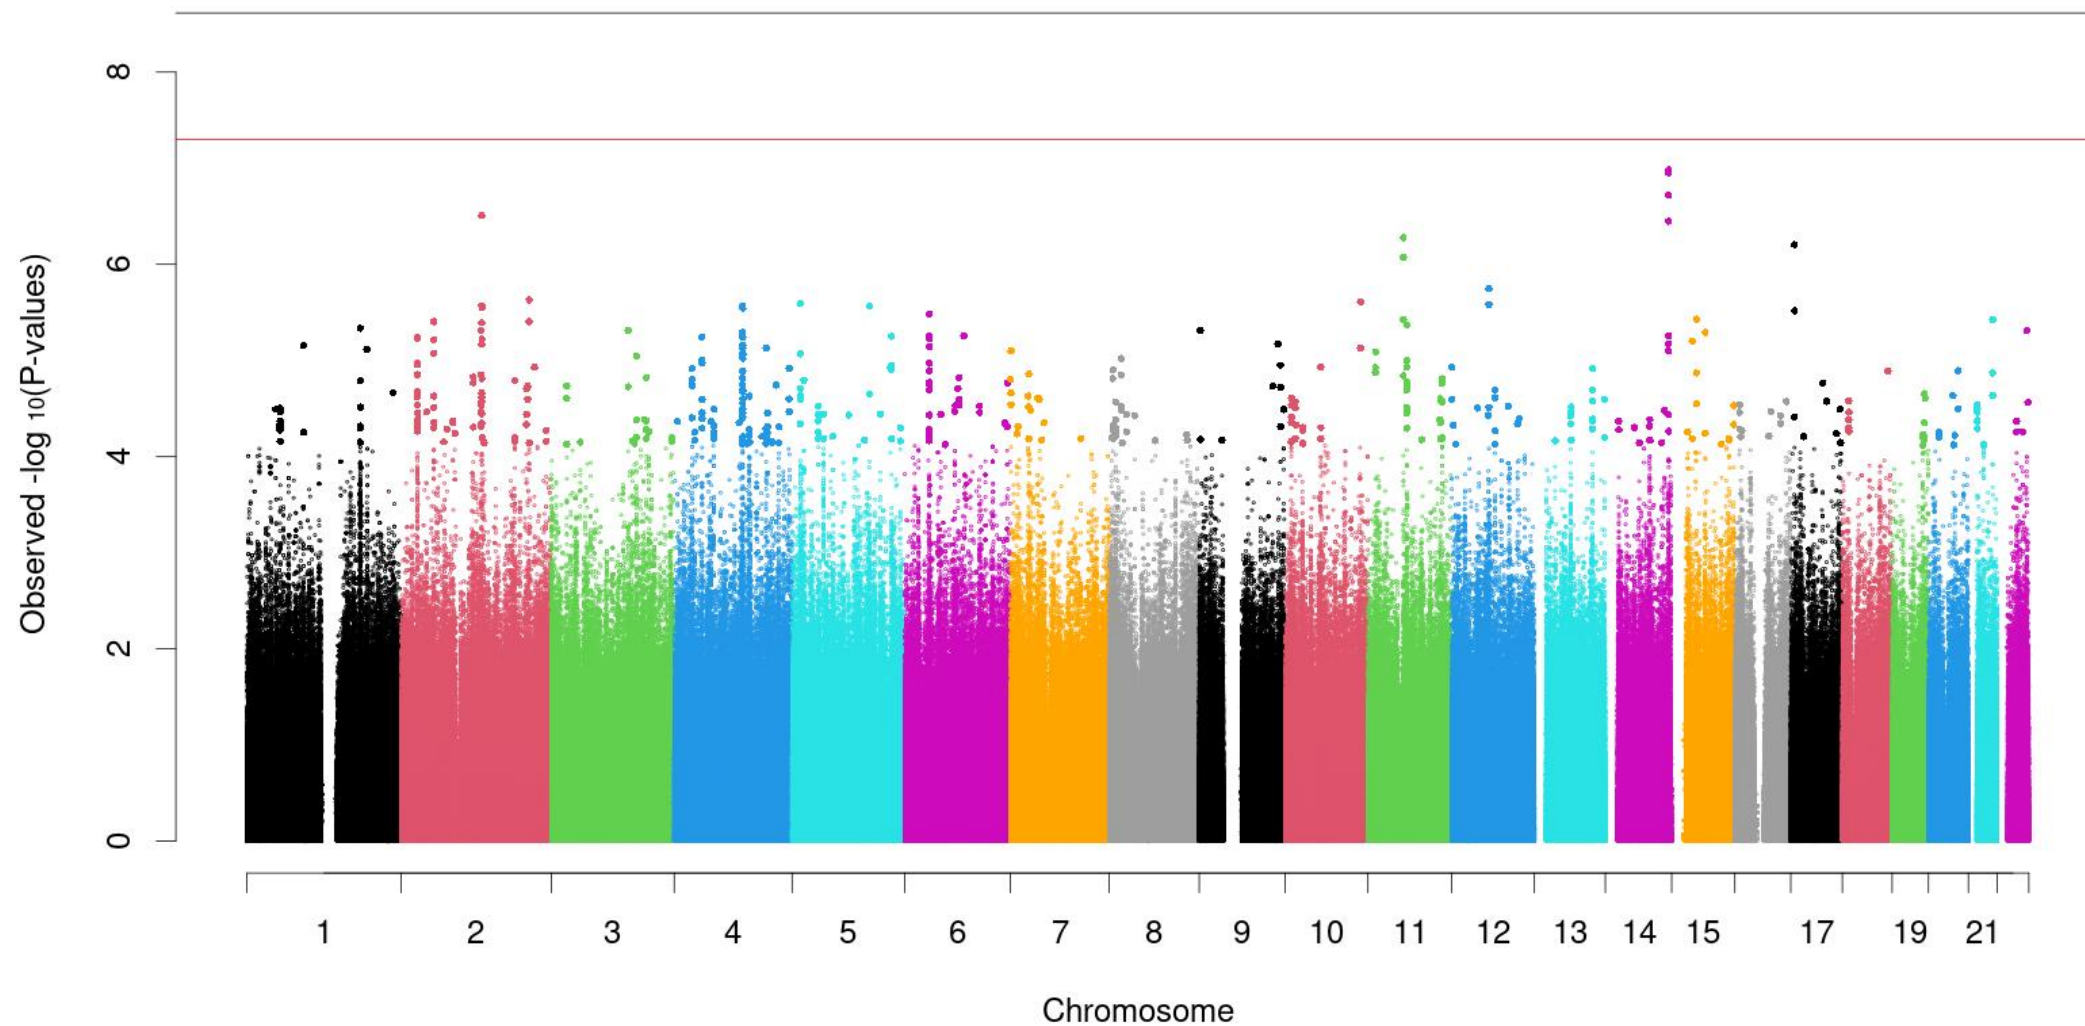



Manhattan plot for mz337.0532\_t26.4, 5-aminoimidazole-4-carboxamide-1-beta-d-ribofuranosyl 5'-monophosphate

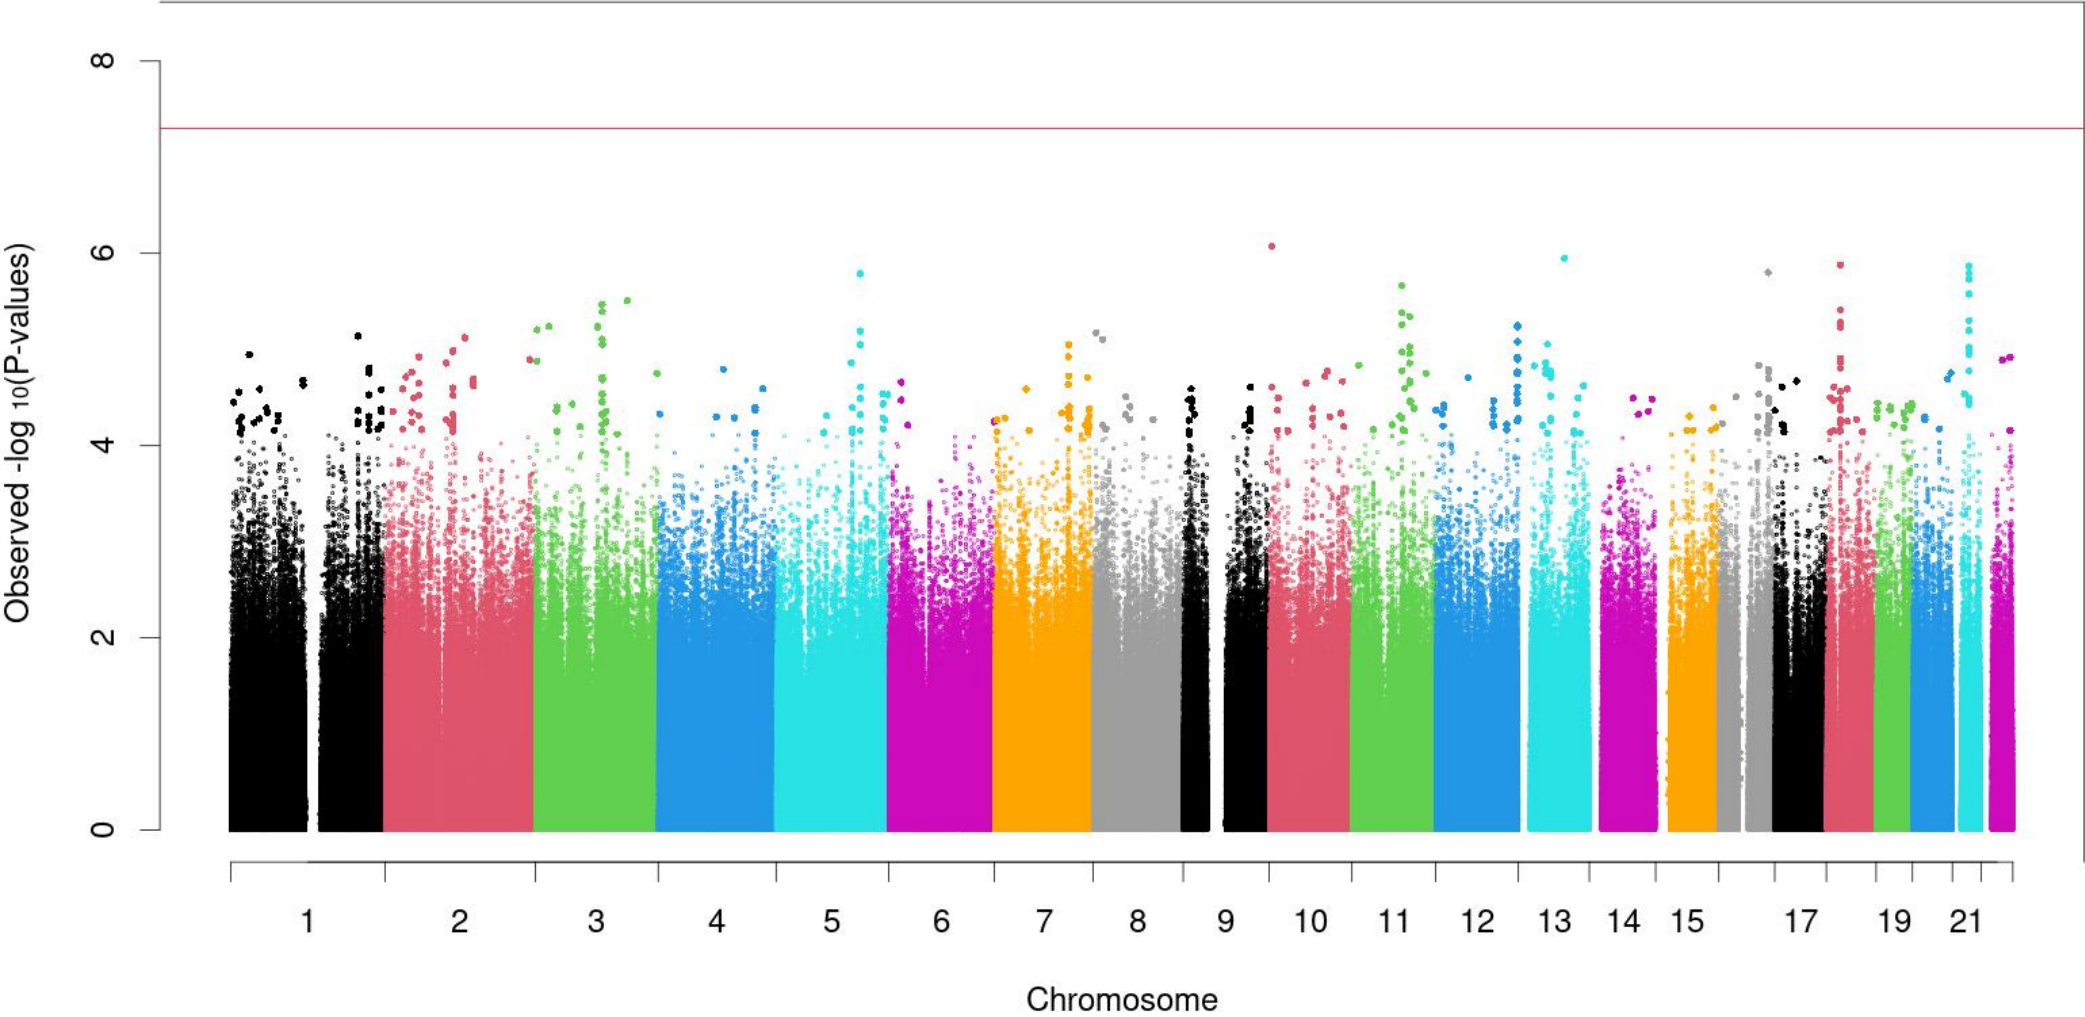

Manhattan plot for mz344.2795\_t32.4, lauroylcarnitine

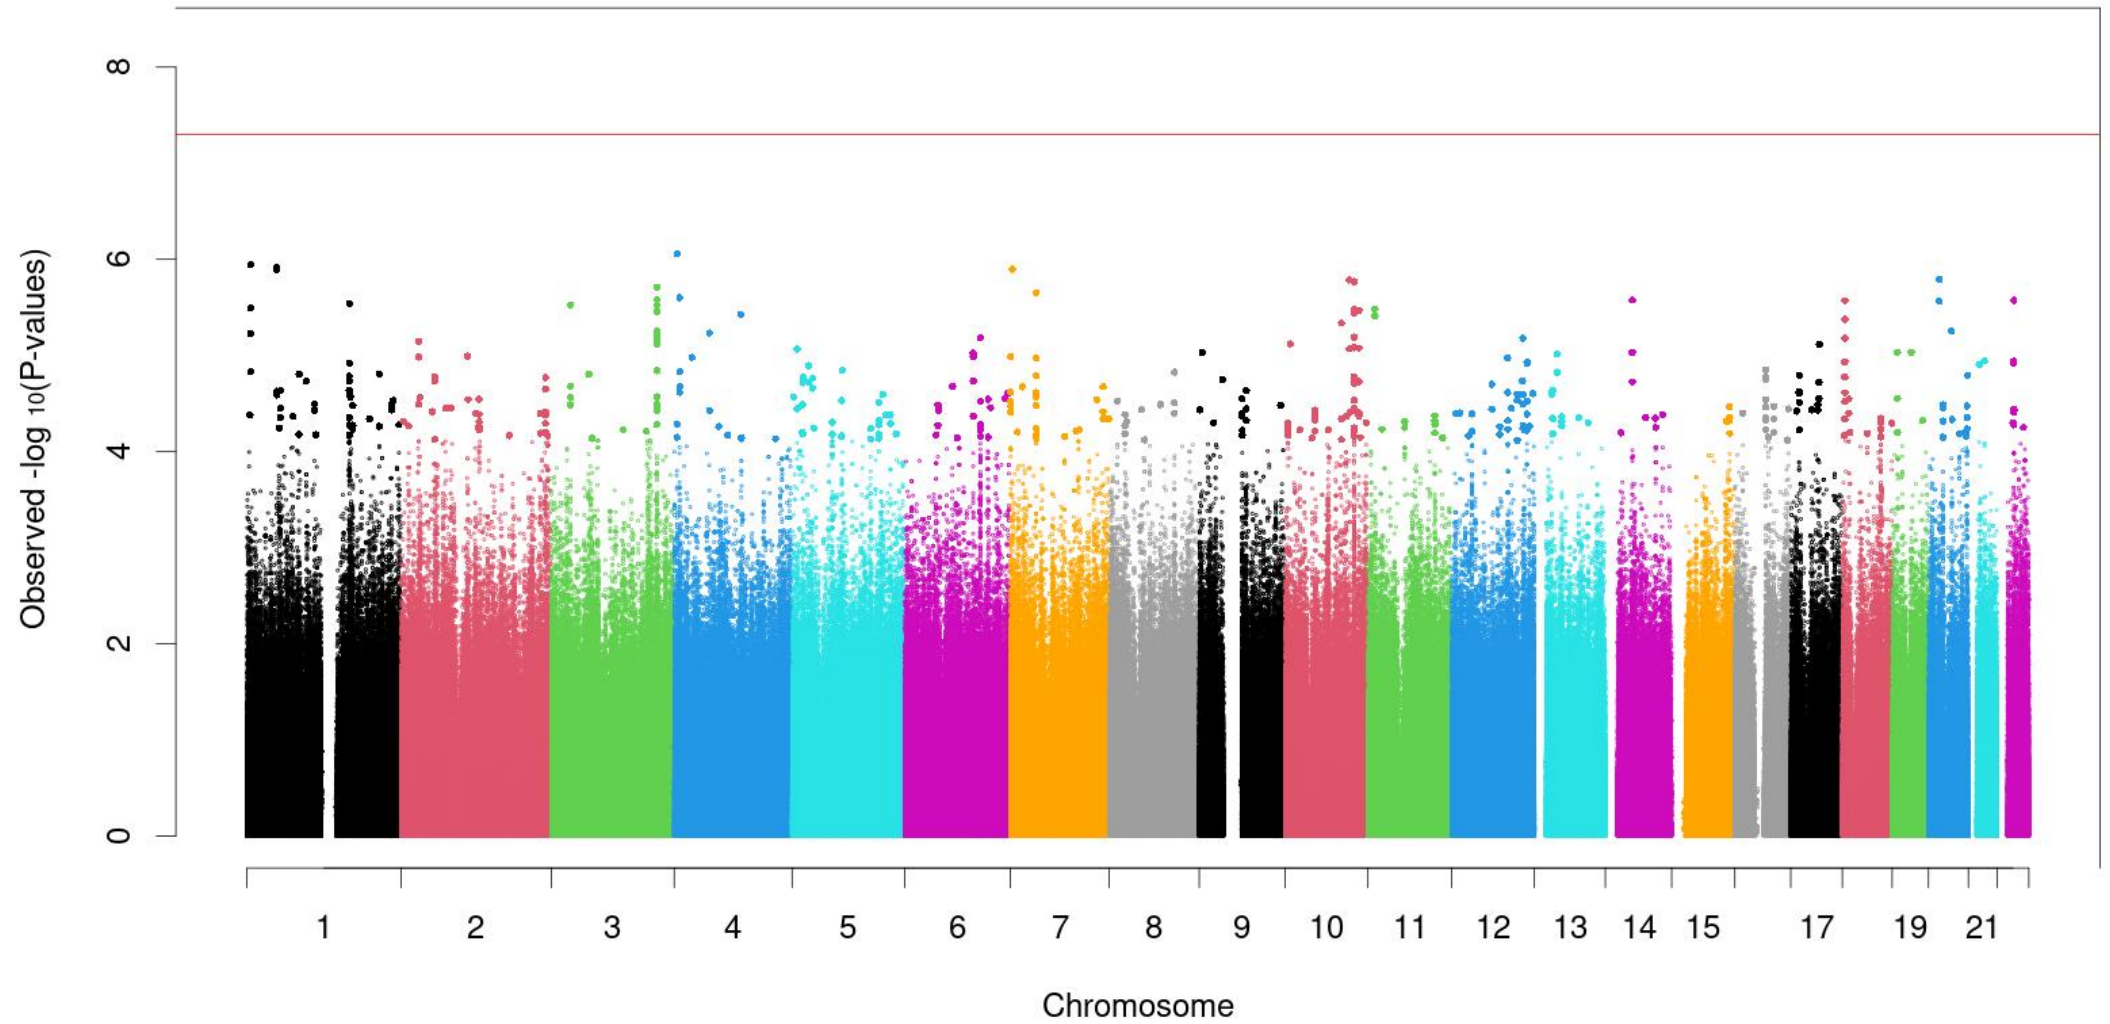

Manhattan plot for mz347.0405\_t30.1, inosine 5'-monophosphate

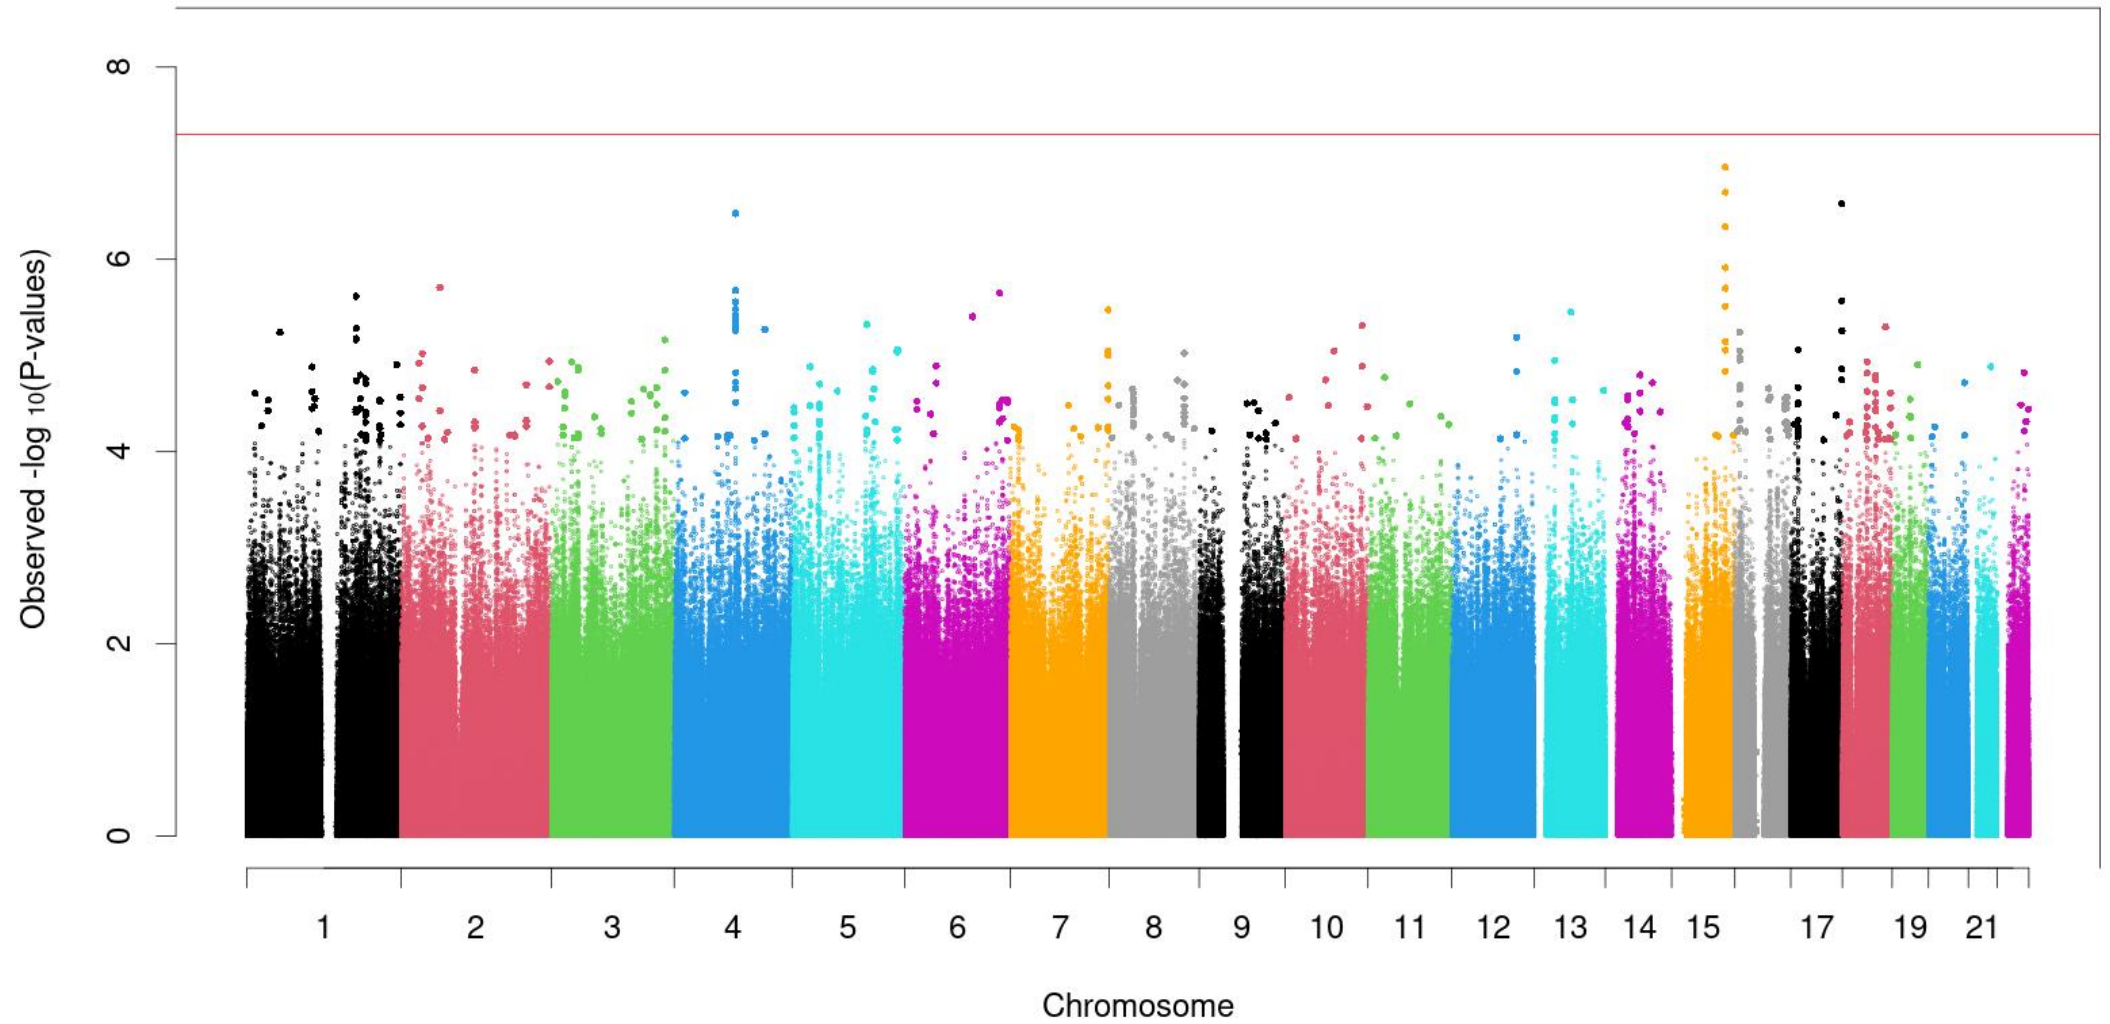



Manhattan plot for mz347.2221\_t21.9, reichstein?s substance s

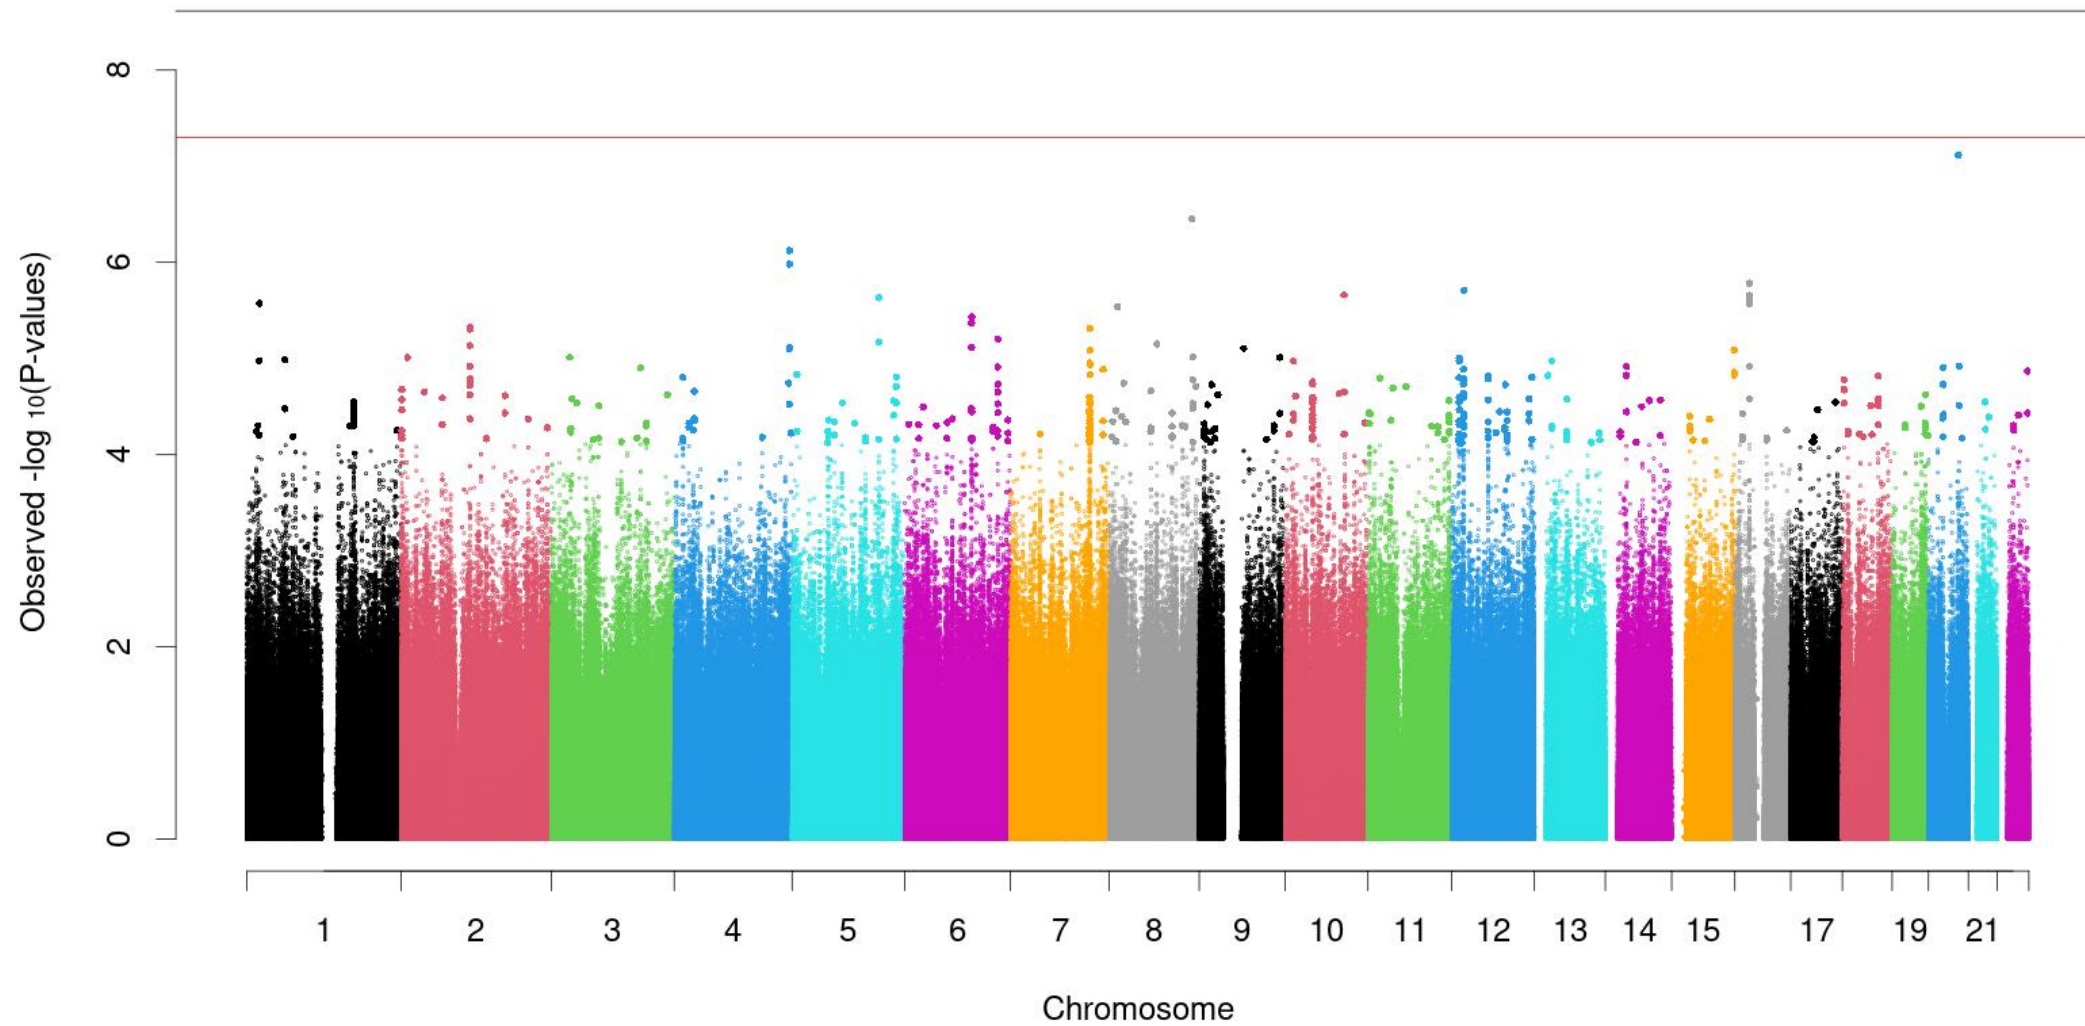

Manhattan plot for mz357.2999\_t24, 1-oleoyl-rac-glycerol

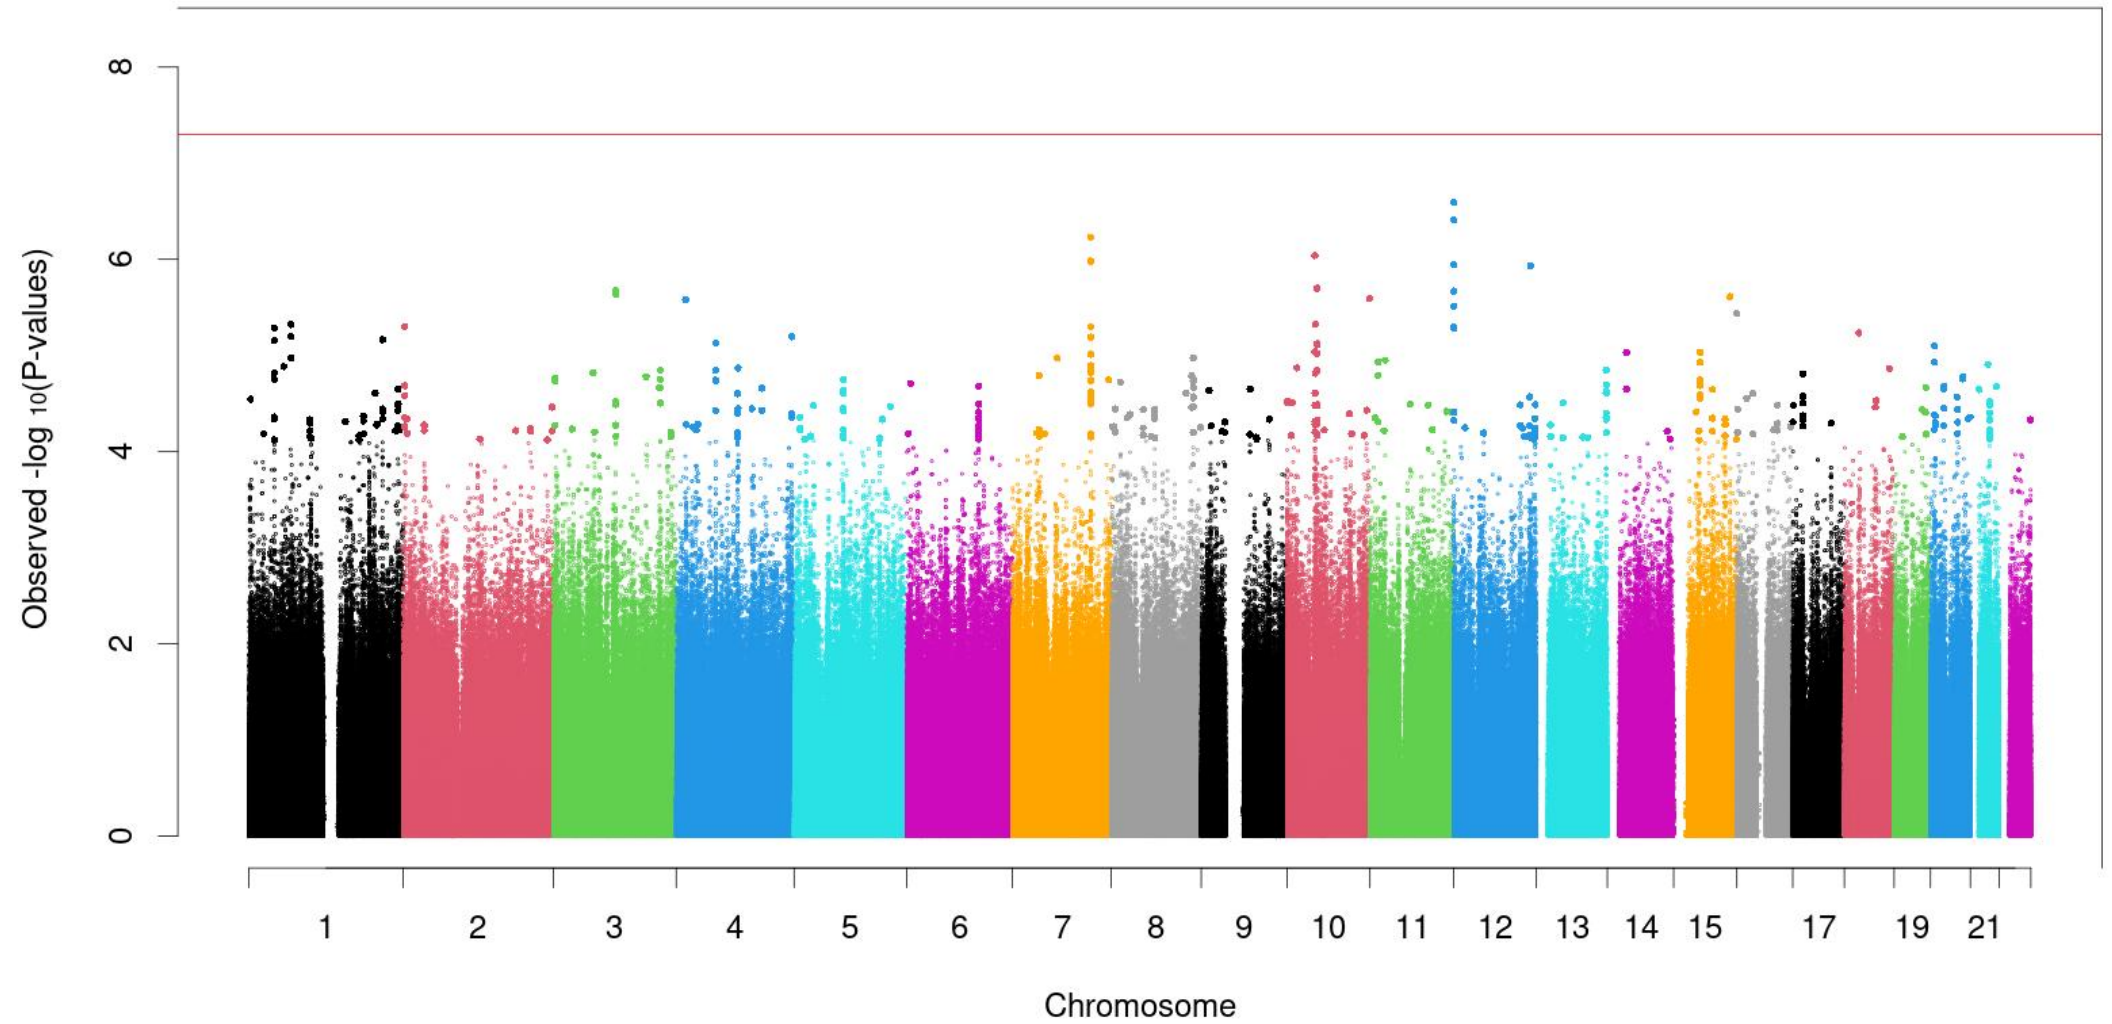

Manhattan plot for mz362.052\_t33, guanosine 5'-monophosphate

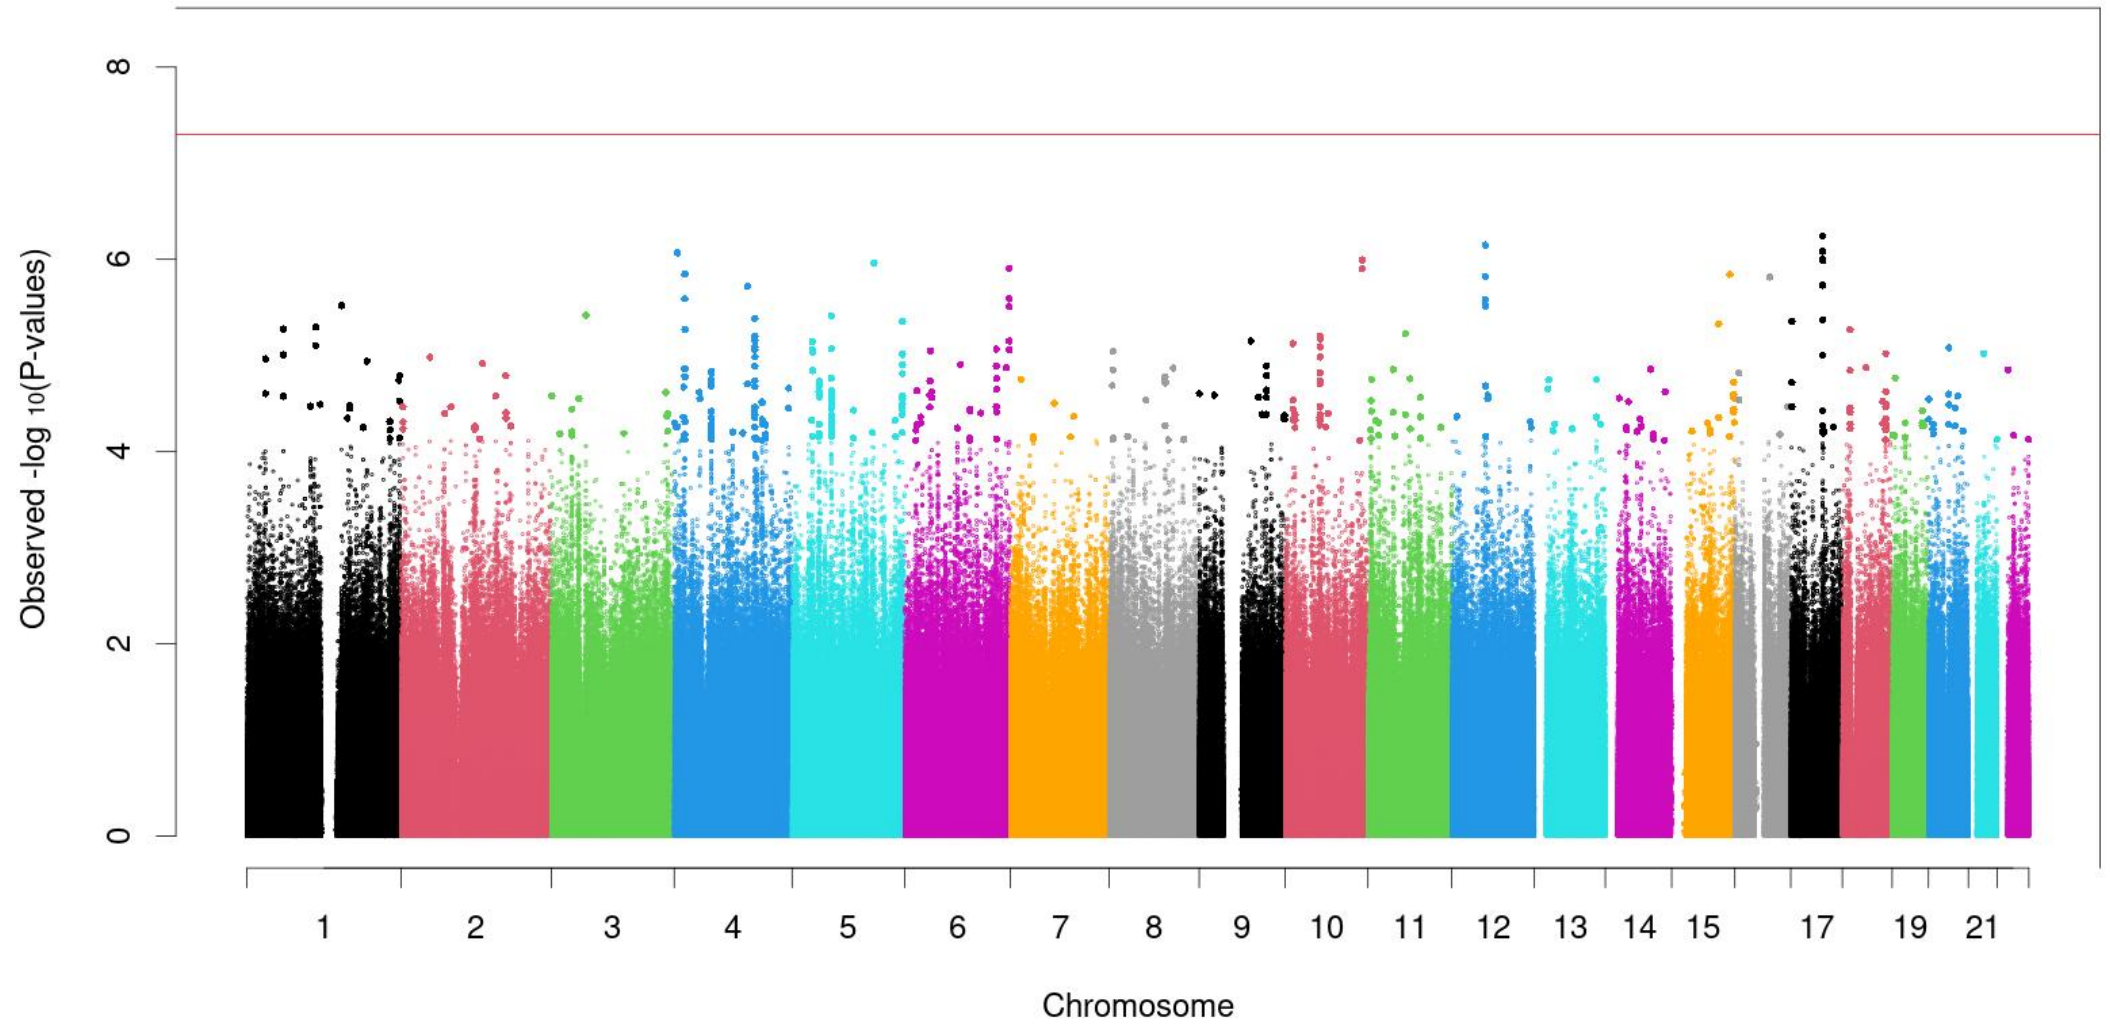



Manhattan plot for mz363.2163\_t27.2, cortisol

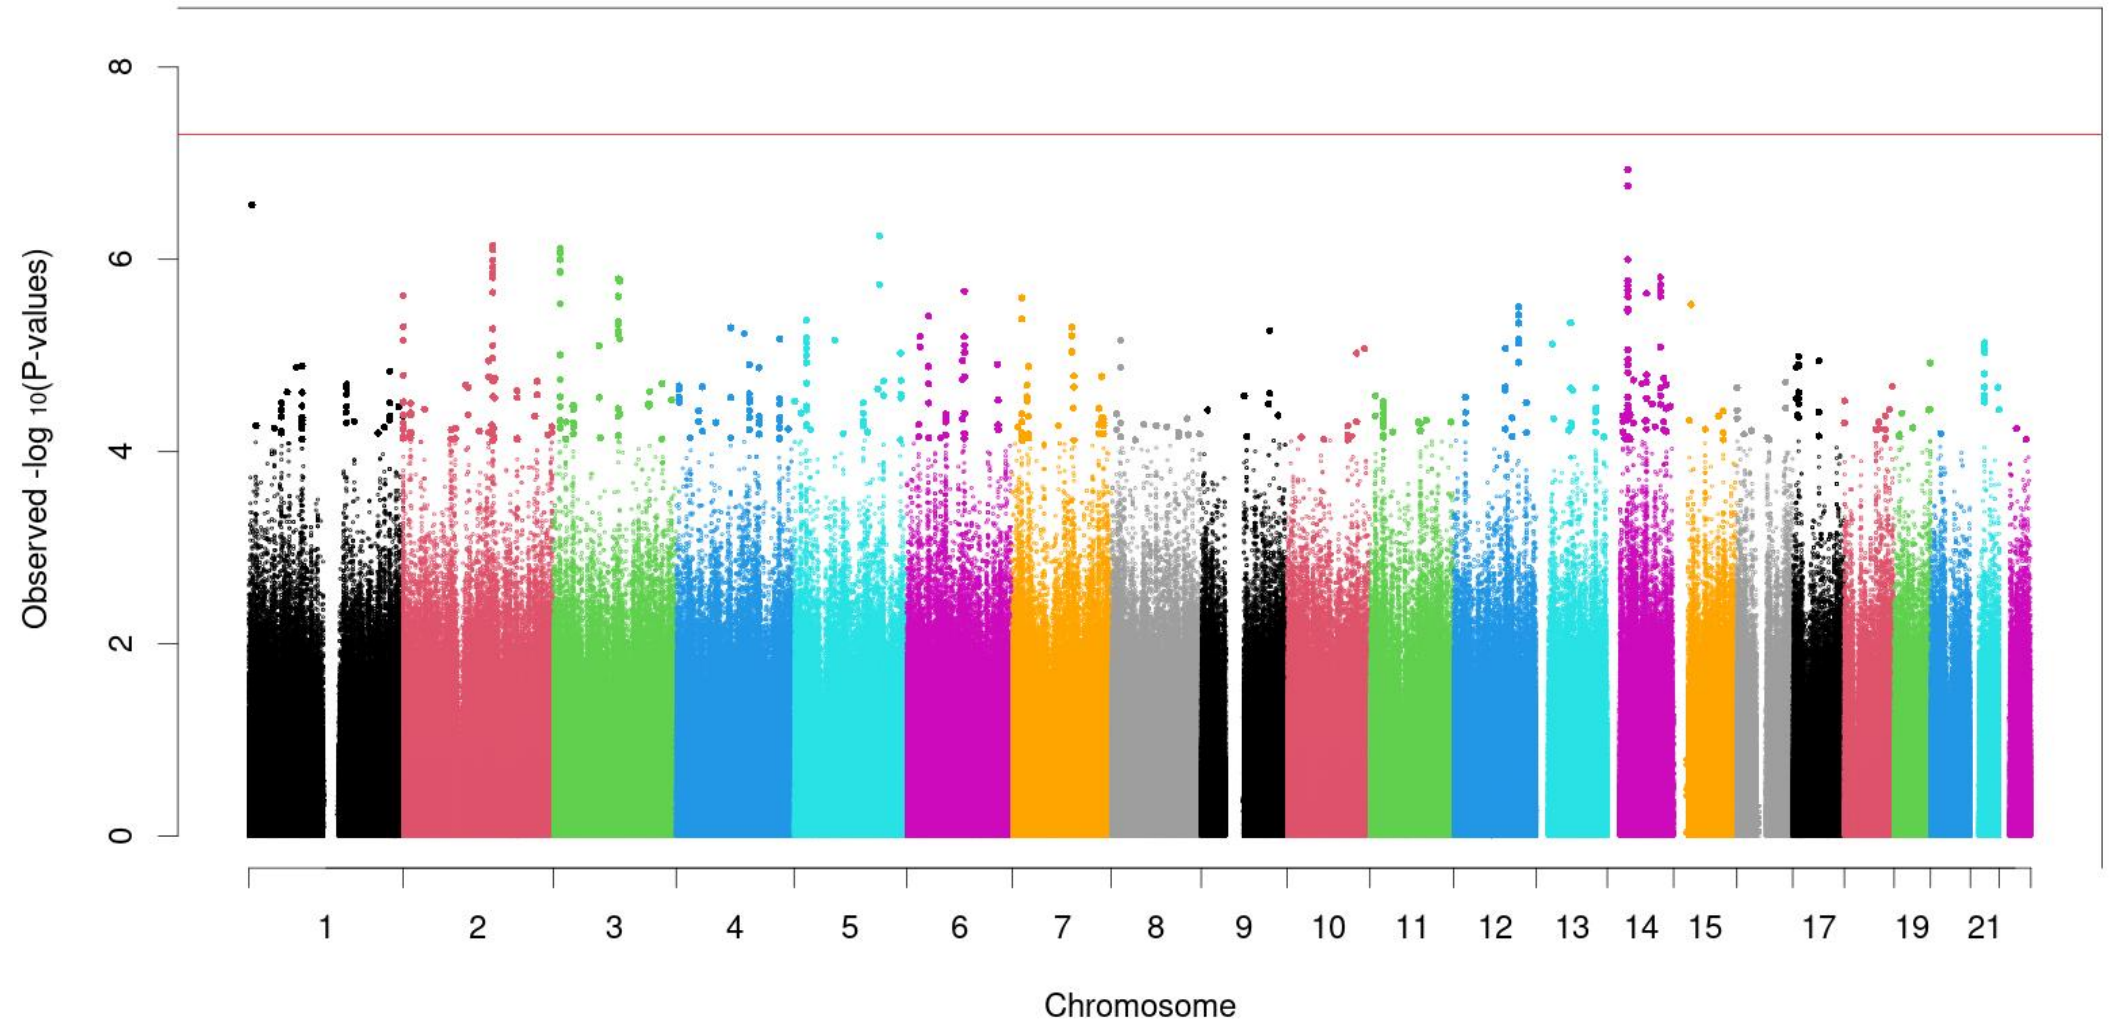

Manhattan plot for mz373.2371\_t19.8, deoxycorticosterone acetate

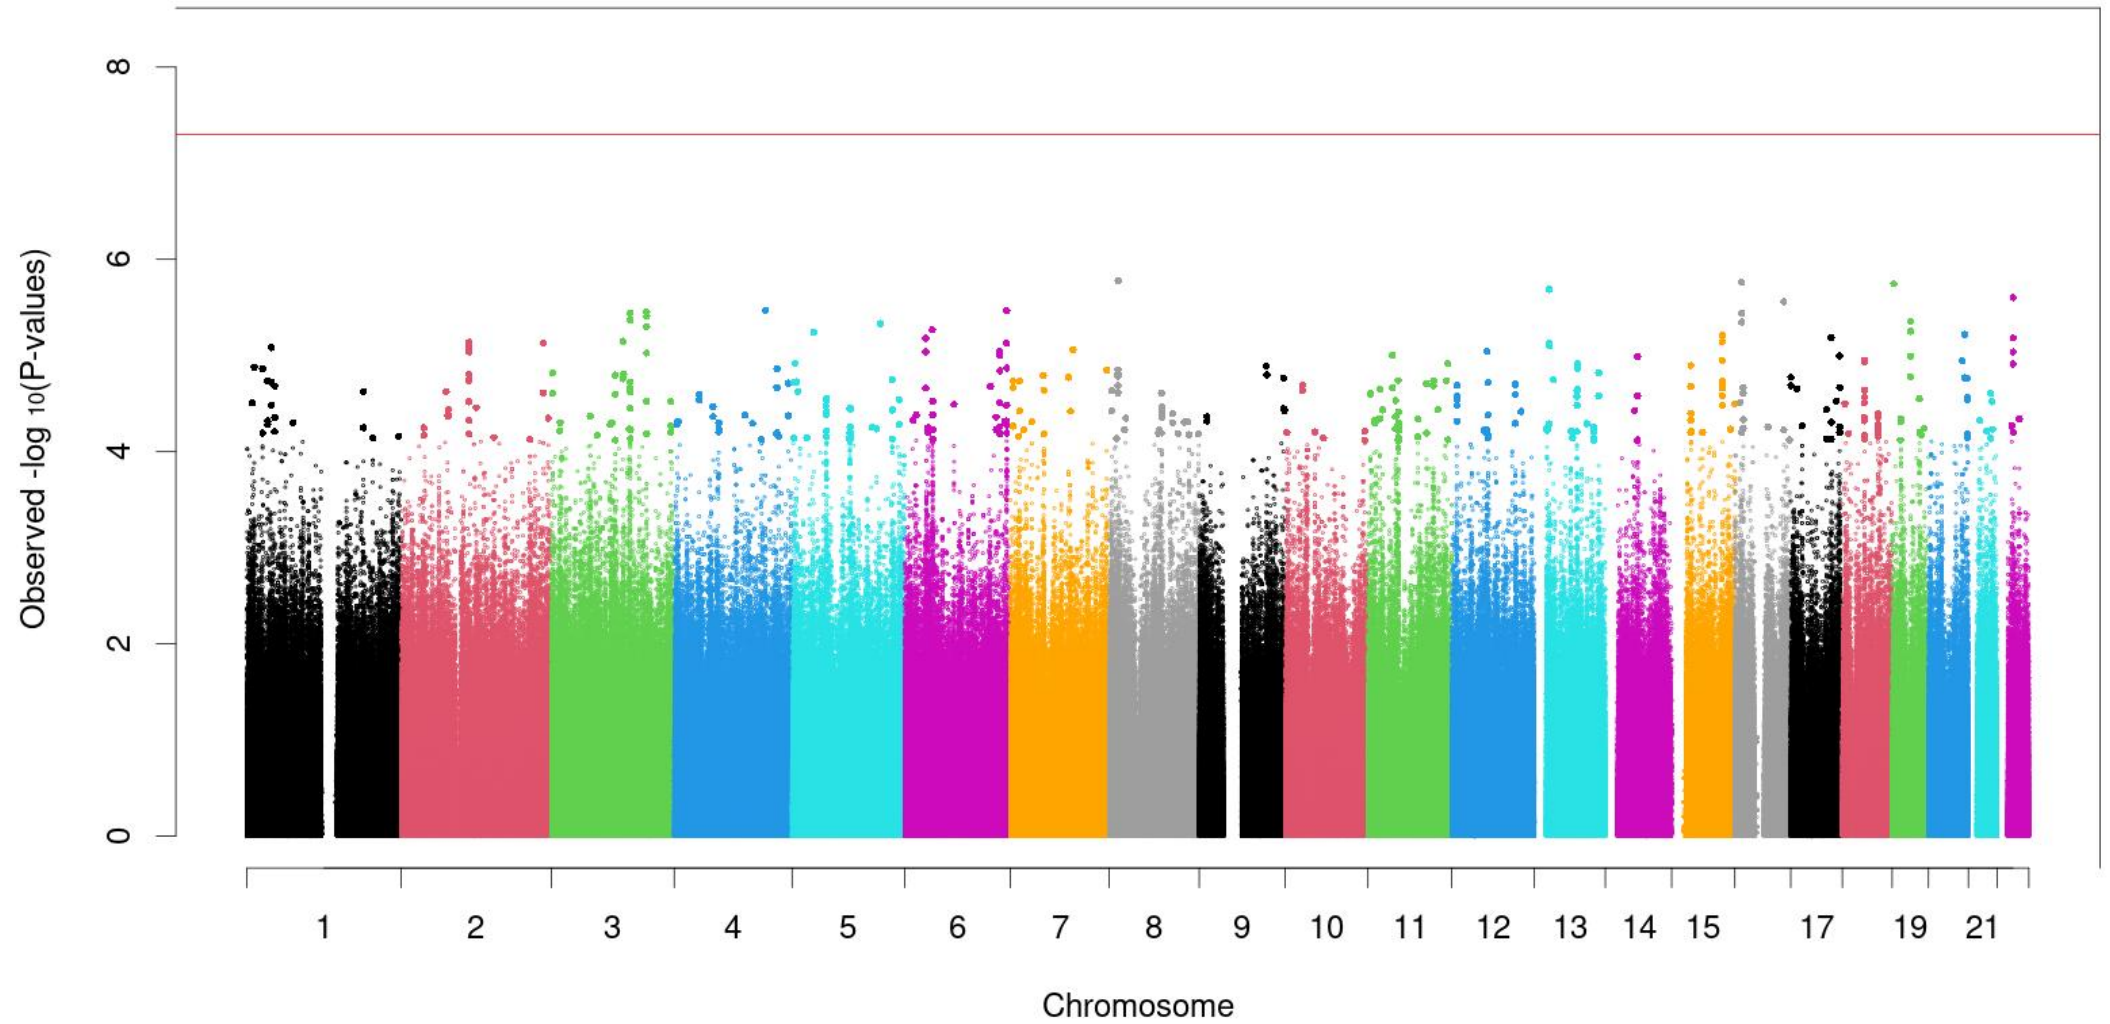

Manhattan plot for mz375.2926\_t209.2, 3alpha-hydroxy-5beta-cholanate

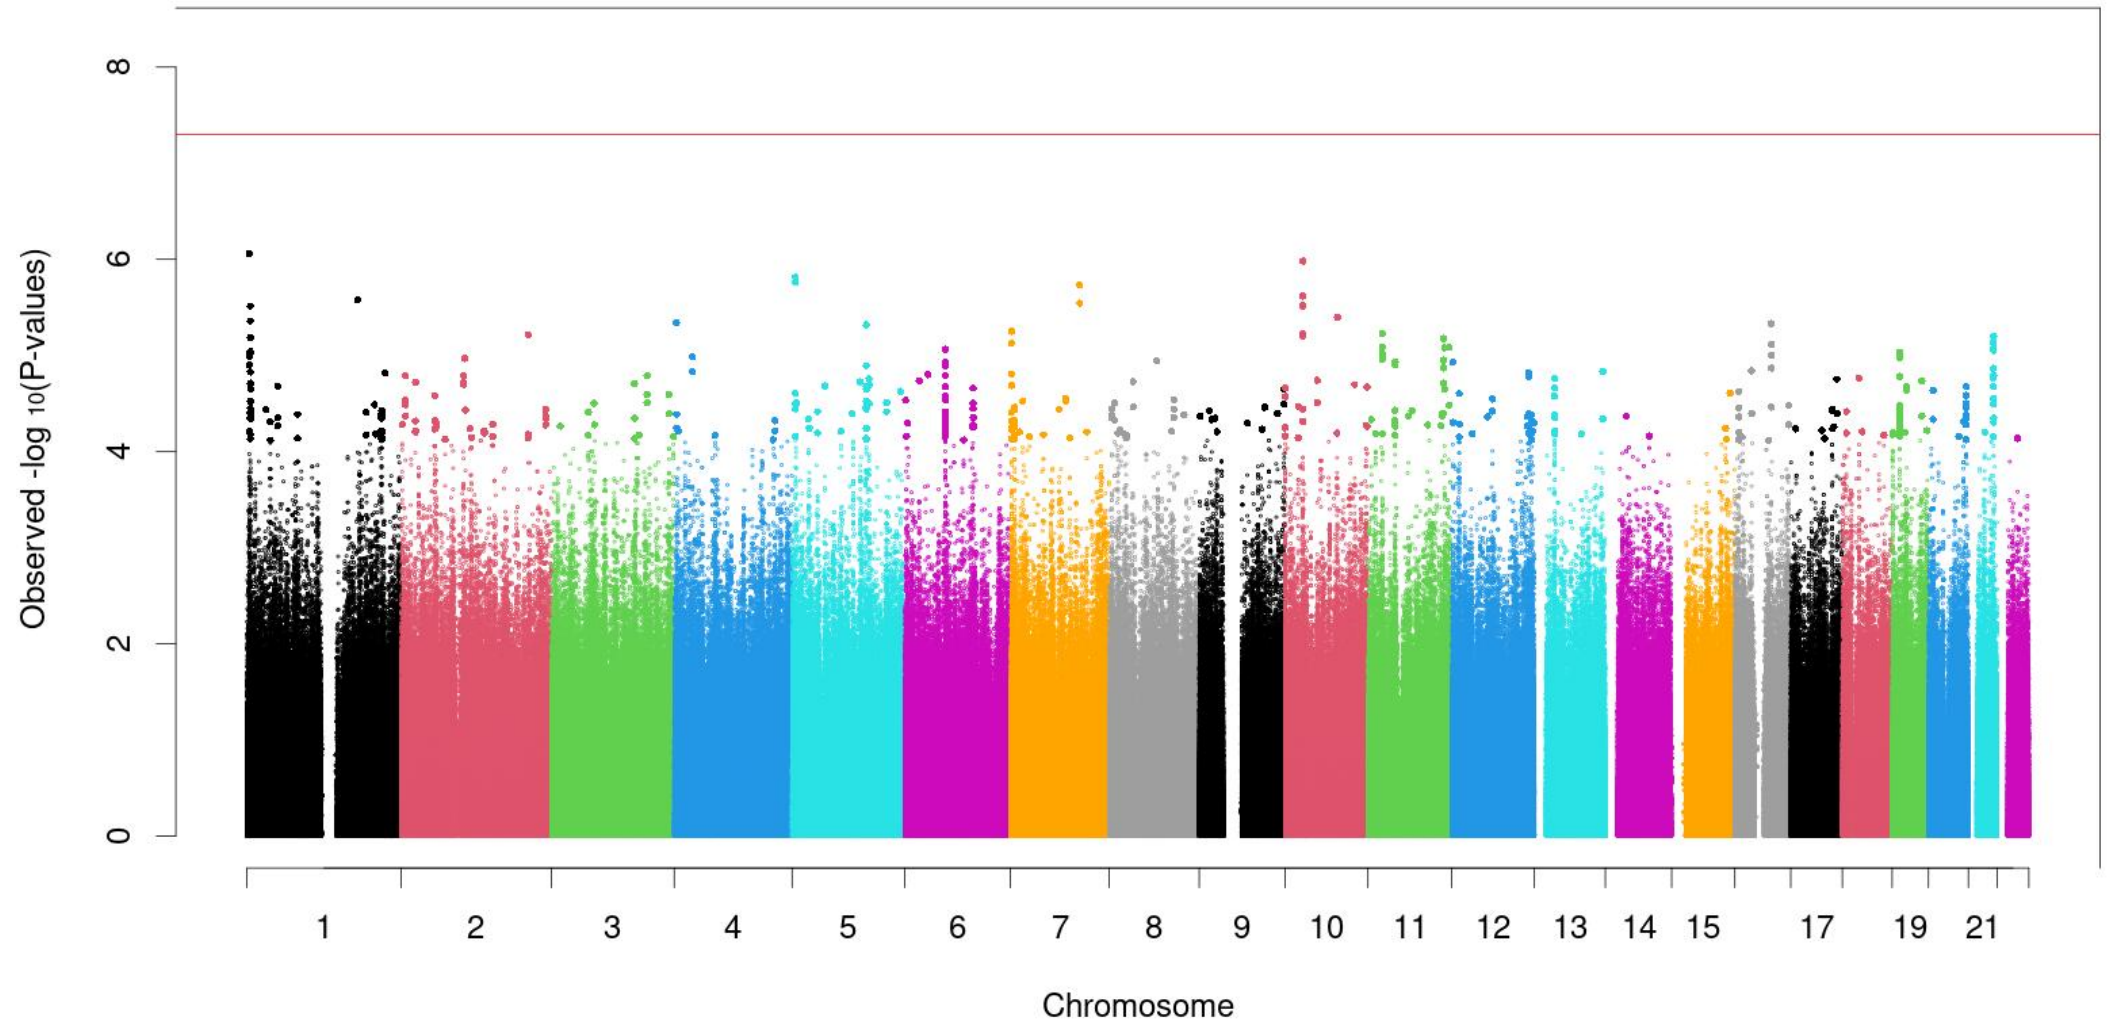



Manhattan plot for mz377.1455\_t37.9, riboflavin

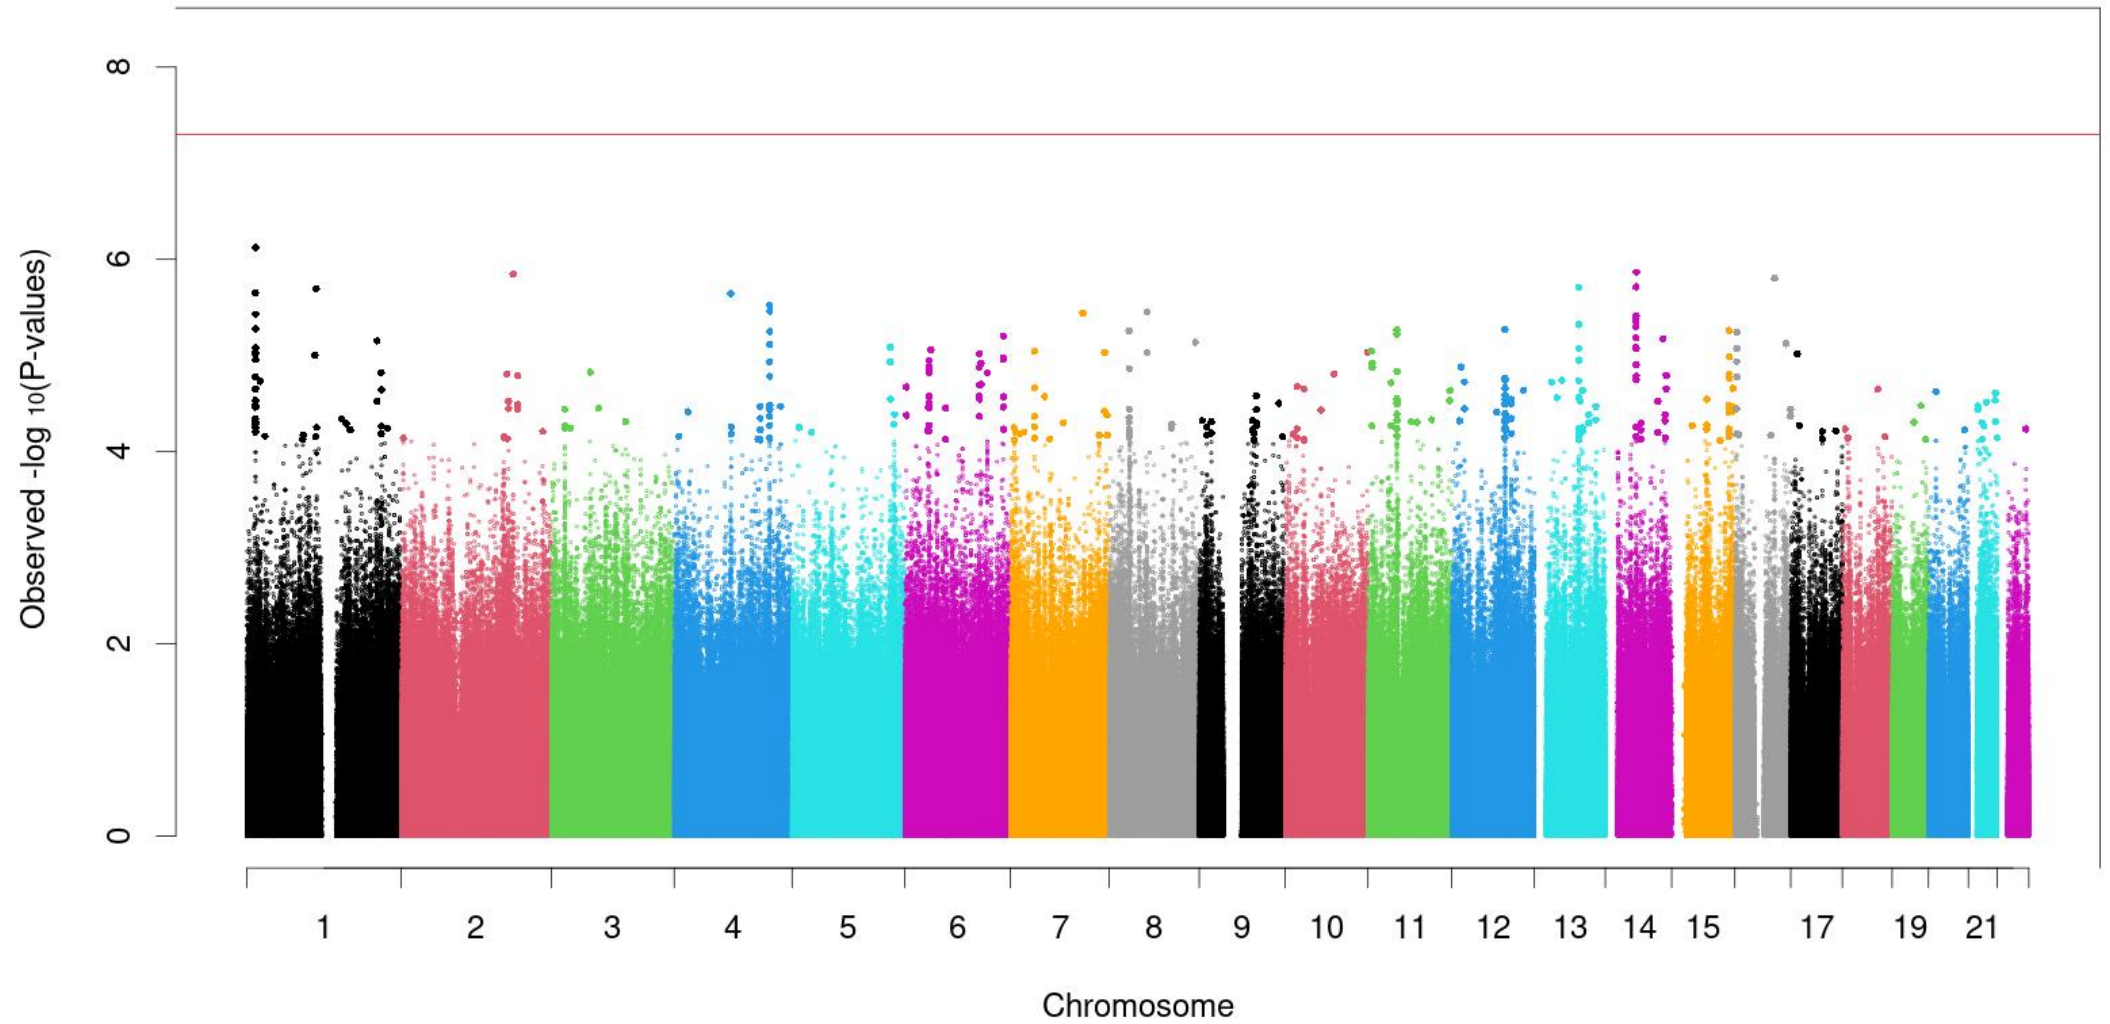

Manhattan plot for mz403.3574\_t23.7, 25-hydroxycholesterol

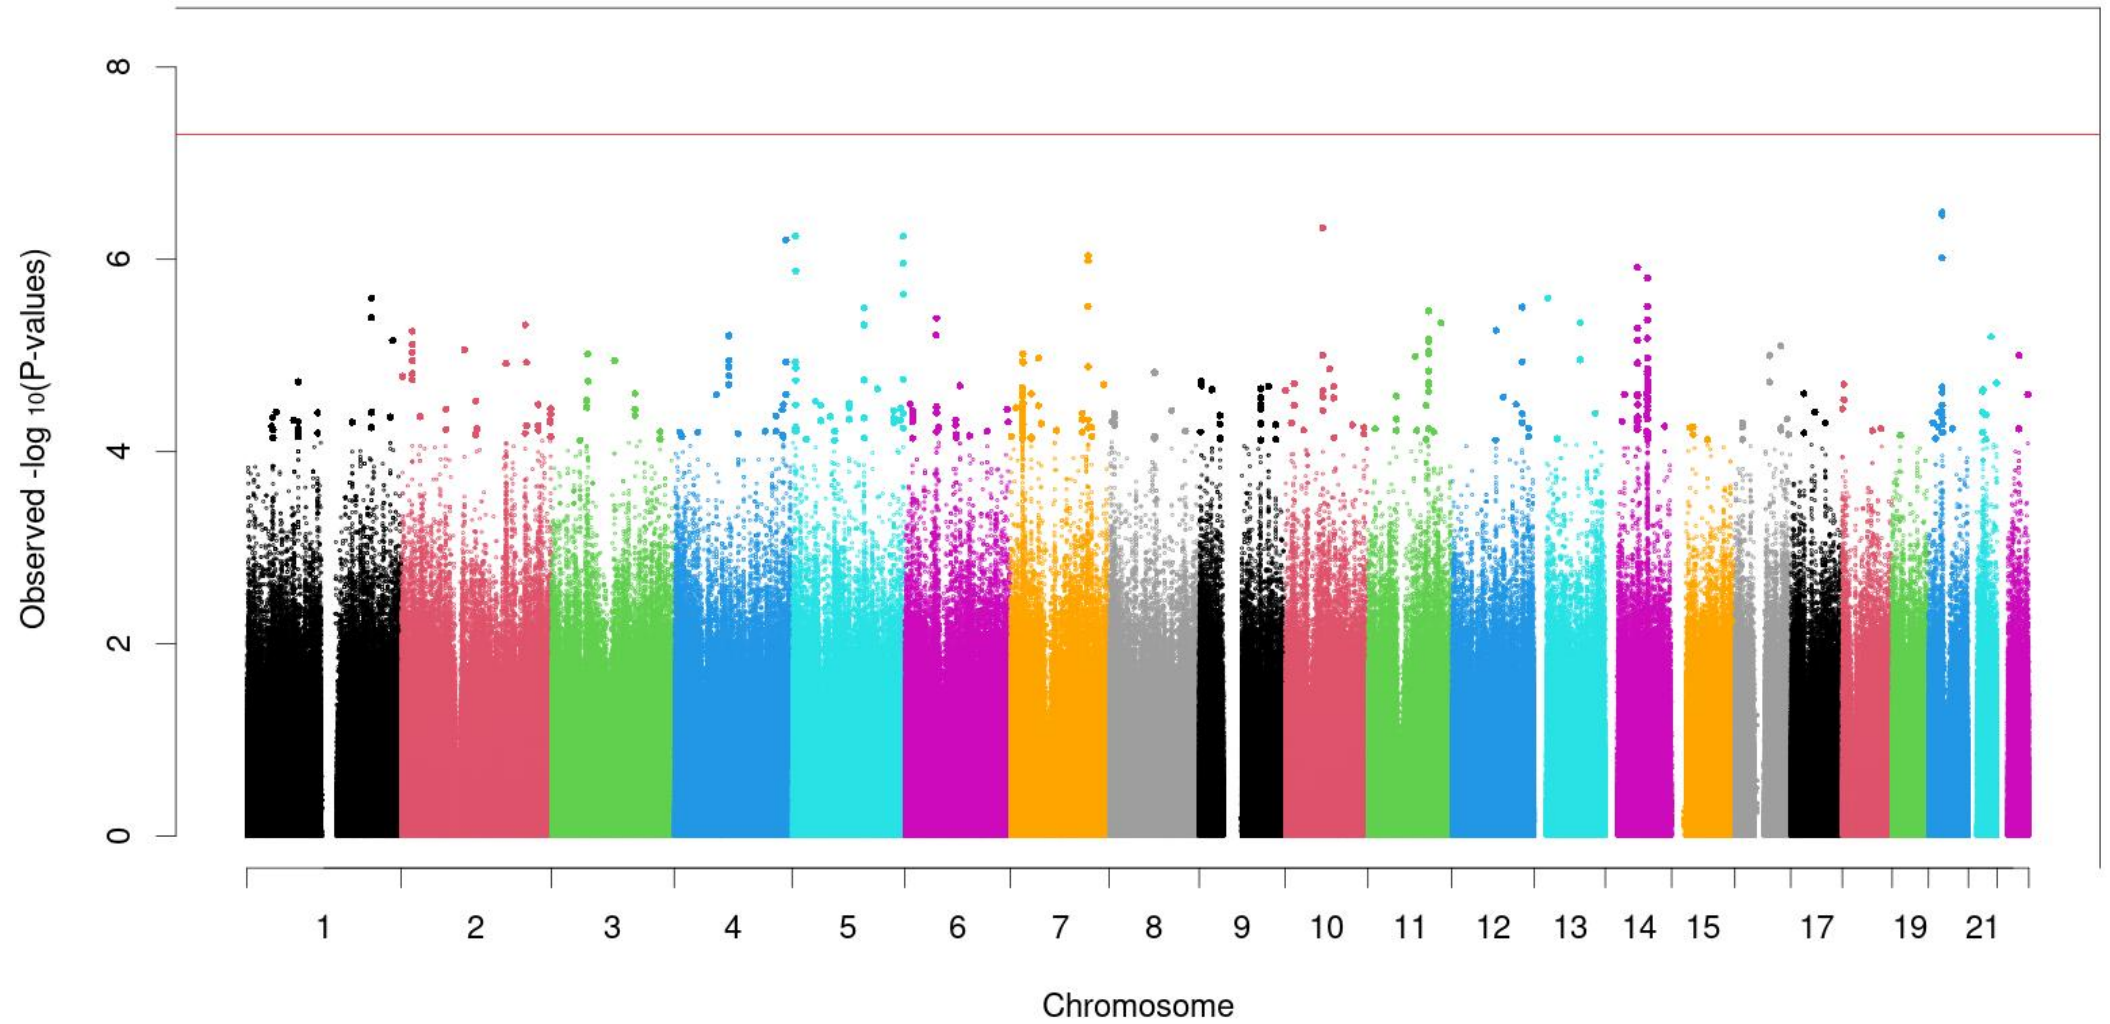

Manhattan plot for mz409.2936\_t20.8, cholate

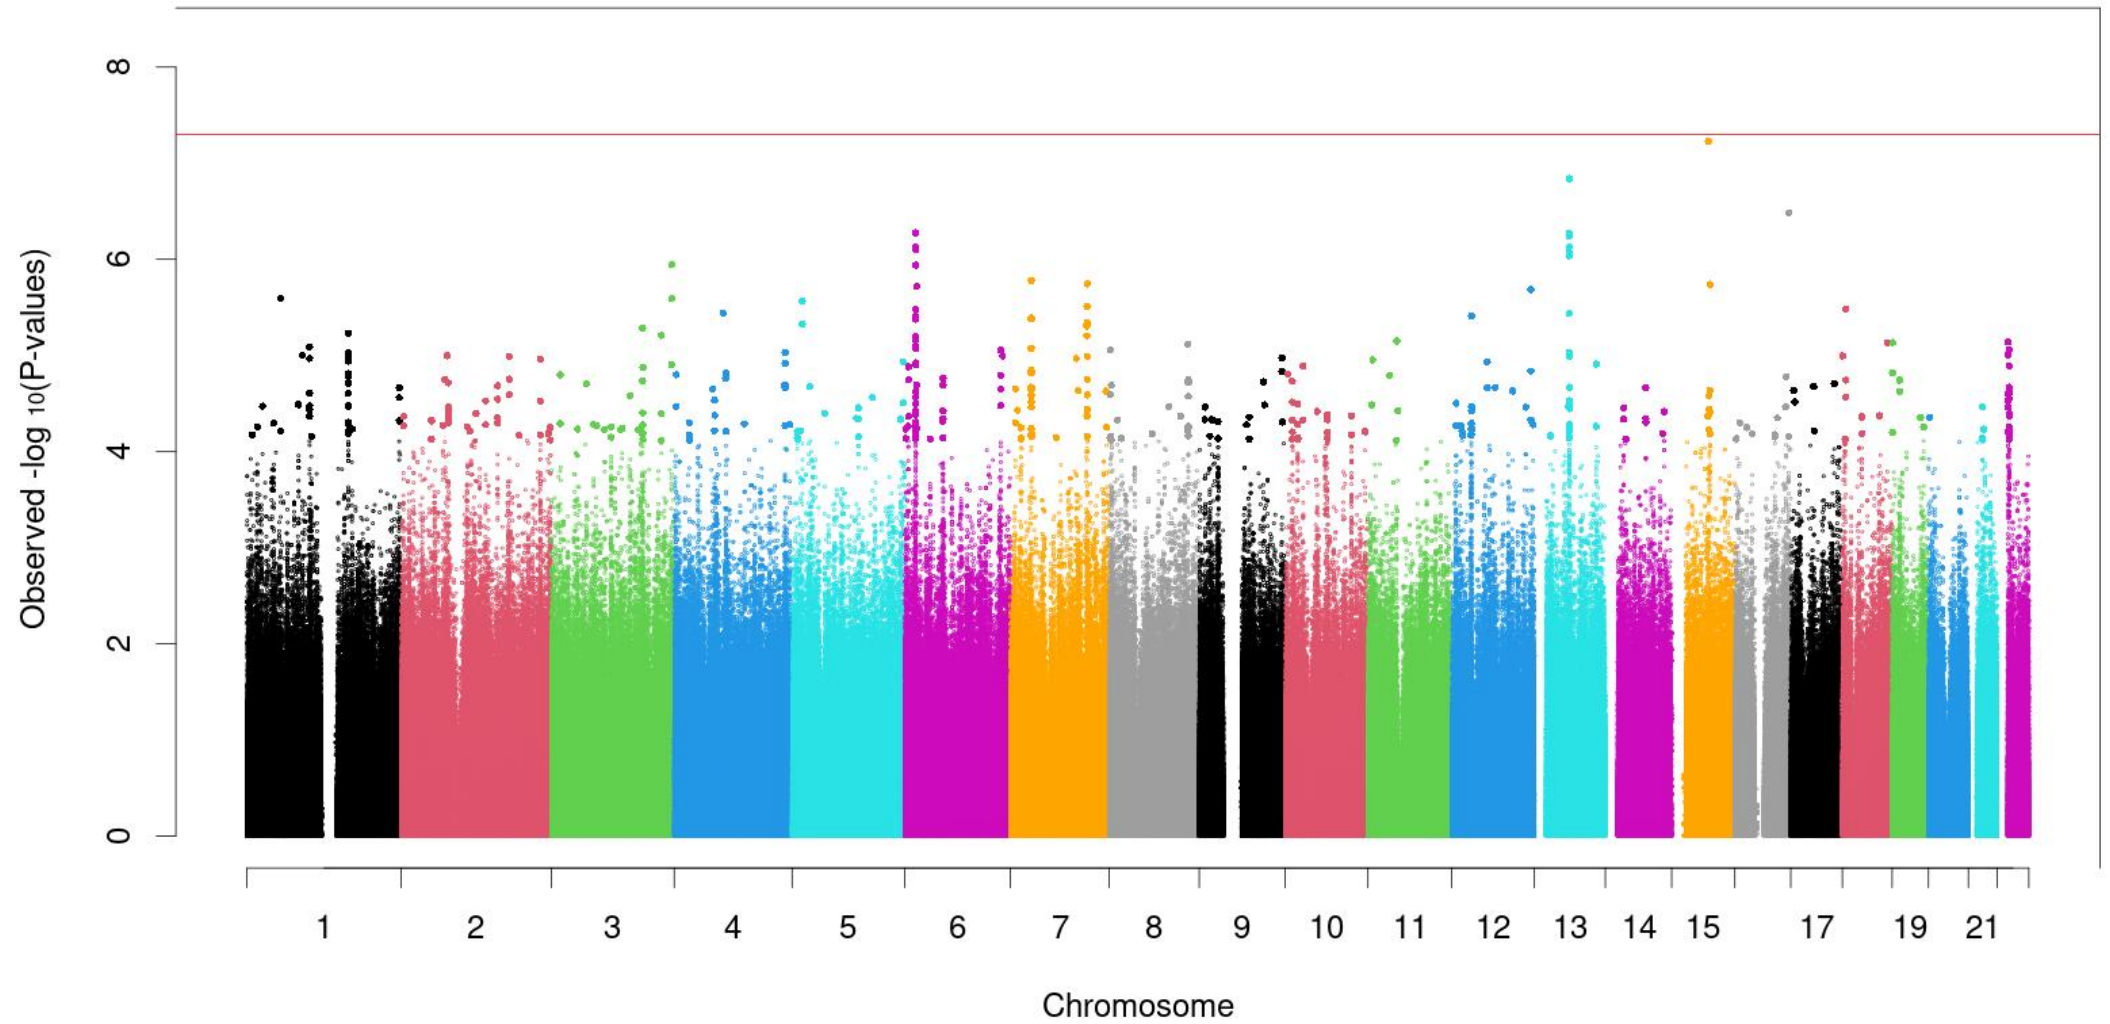



Manhattan plot for mz583.2537\_t25.4, biliverdin

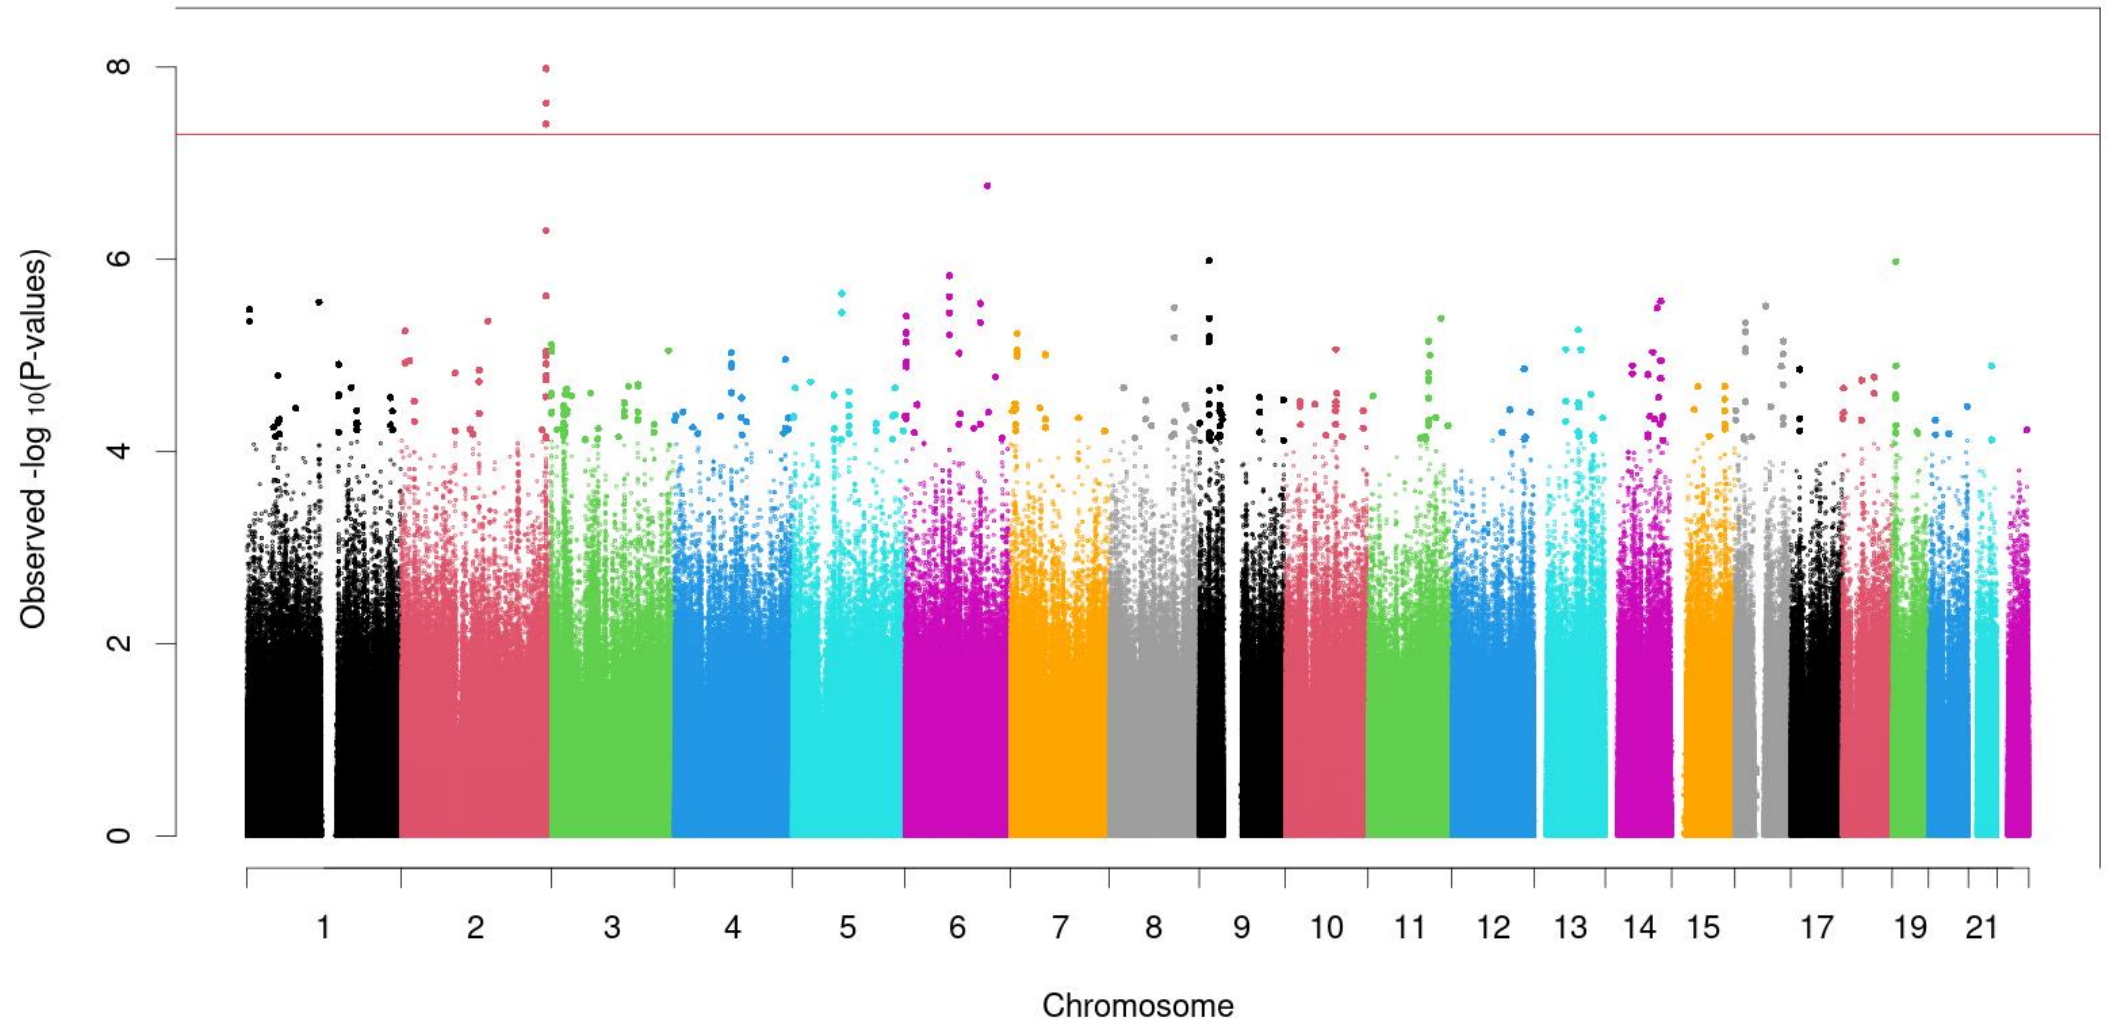

Manhattan plot for mz585.2707\_t23.2, bilirubin

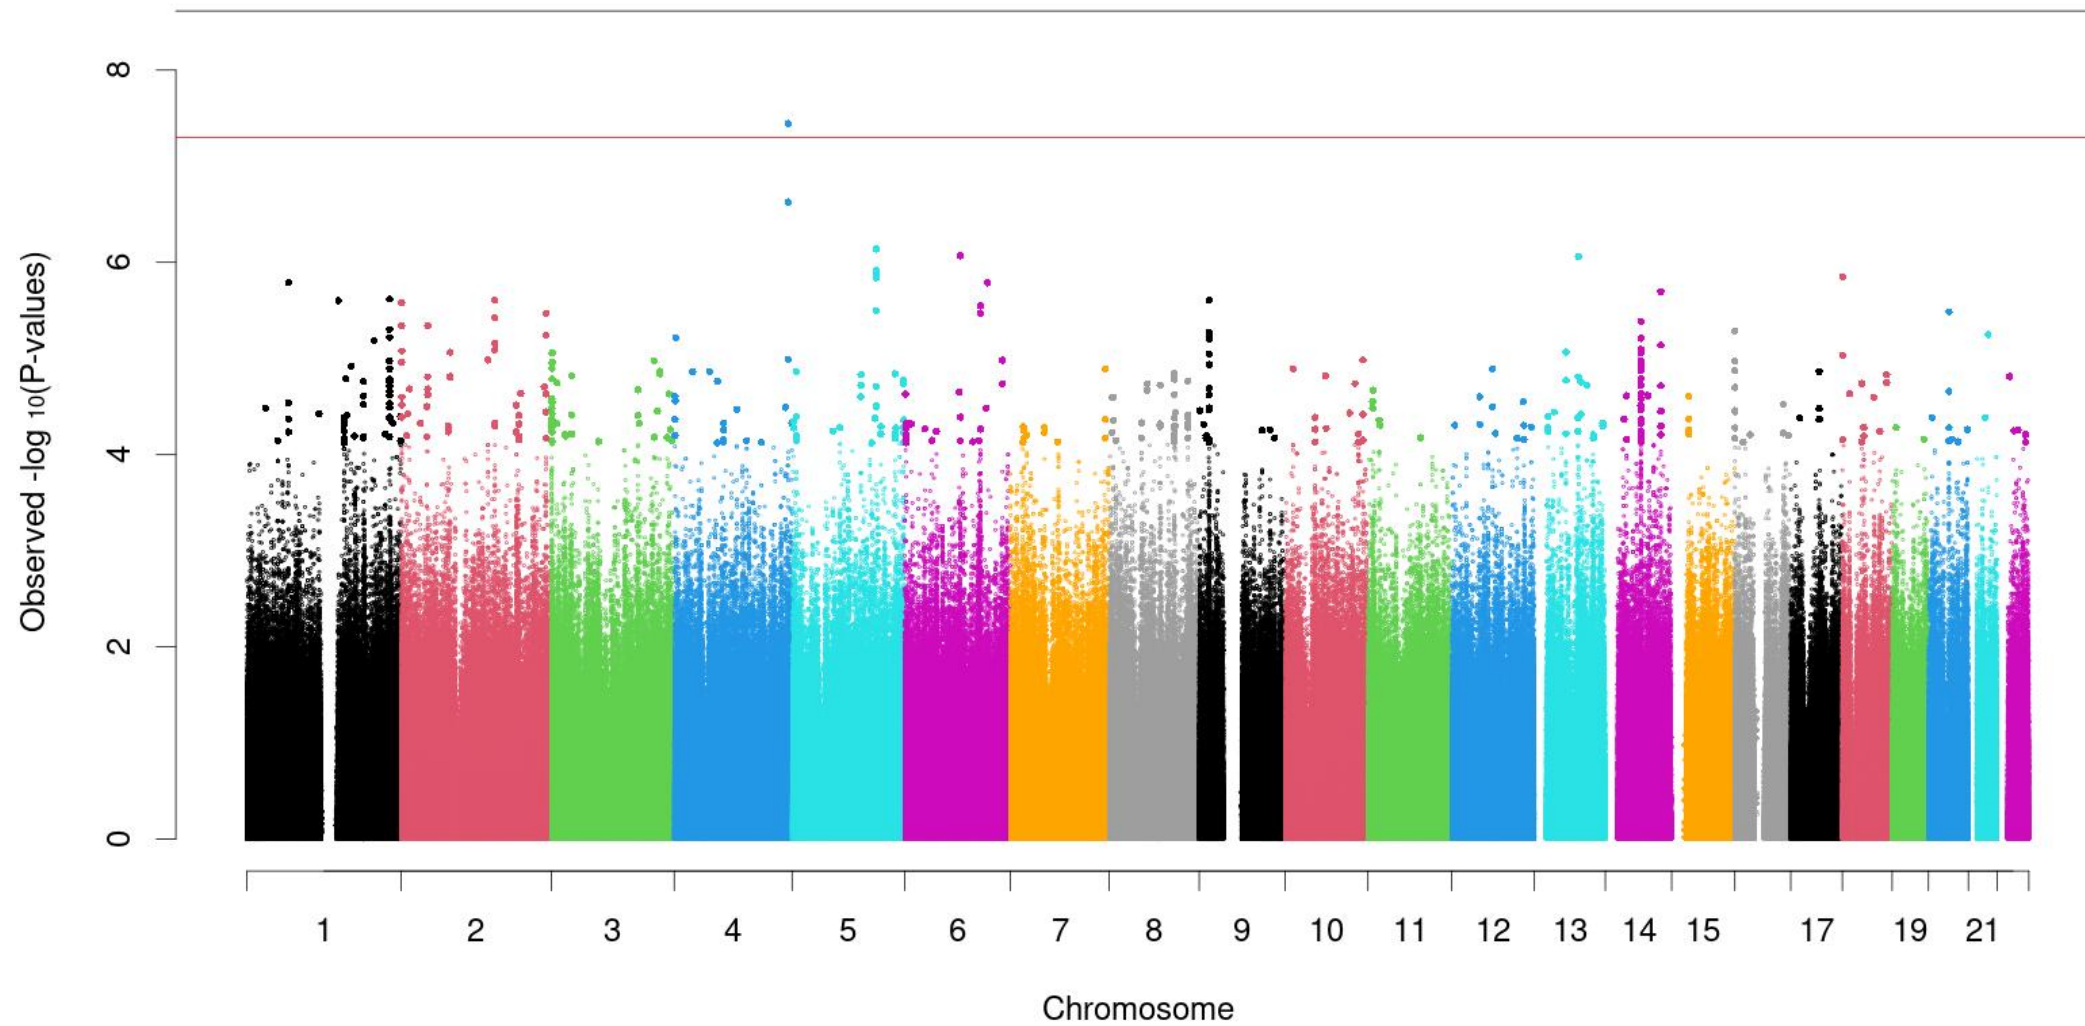

Manhattan plot for mz777.6935\_t33.9, thyroxine

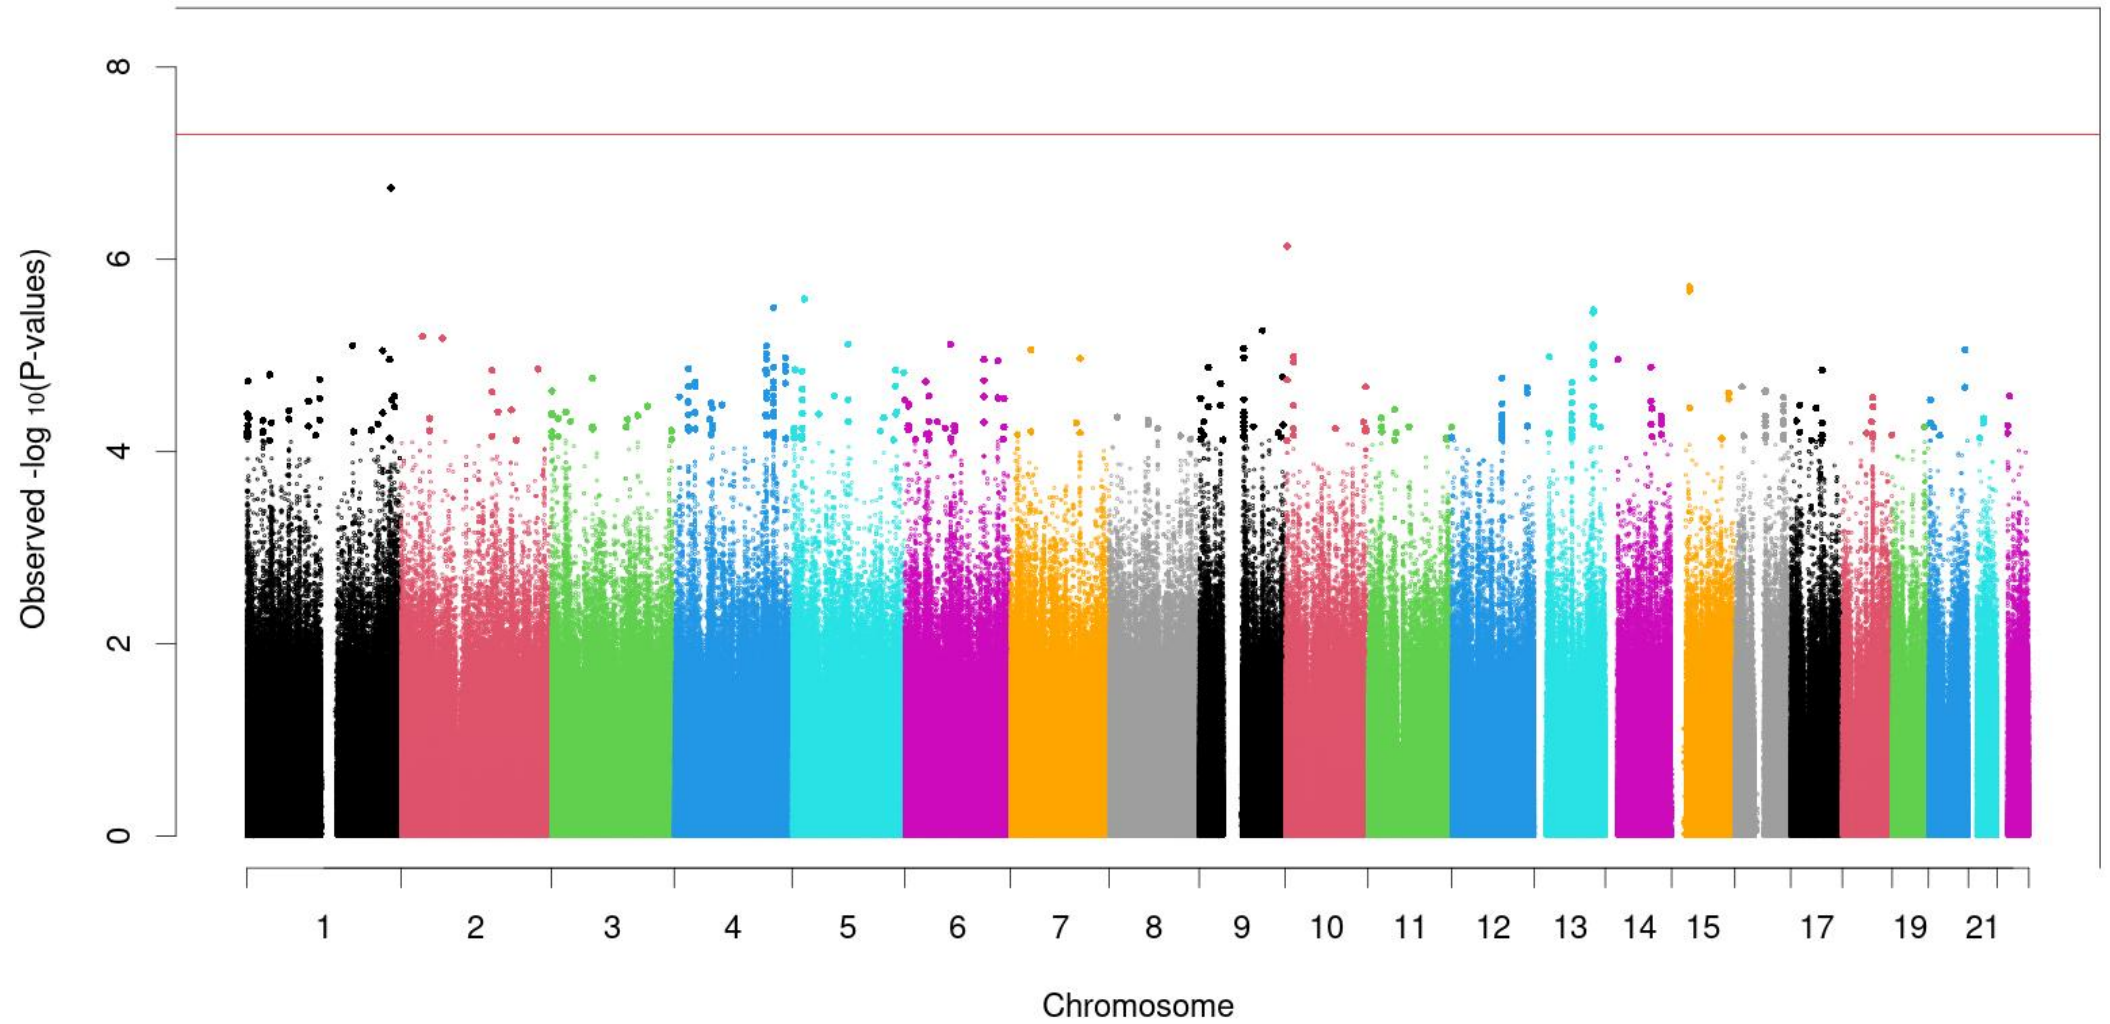

Supplement: s1 [file s1]
