# Supplementary material for: Crosstalk between Host Genome and Metabolome among People with HIV in South Africa
Source: MDPI journal article supplement (doi:10.3390/metabo12070624), 2022-07-06

QQ plot for mz87.0087\_t22.3, pyruvate  
inflation factor = 1.004

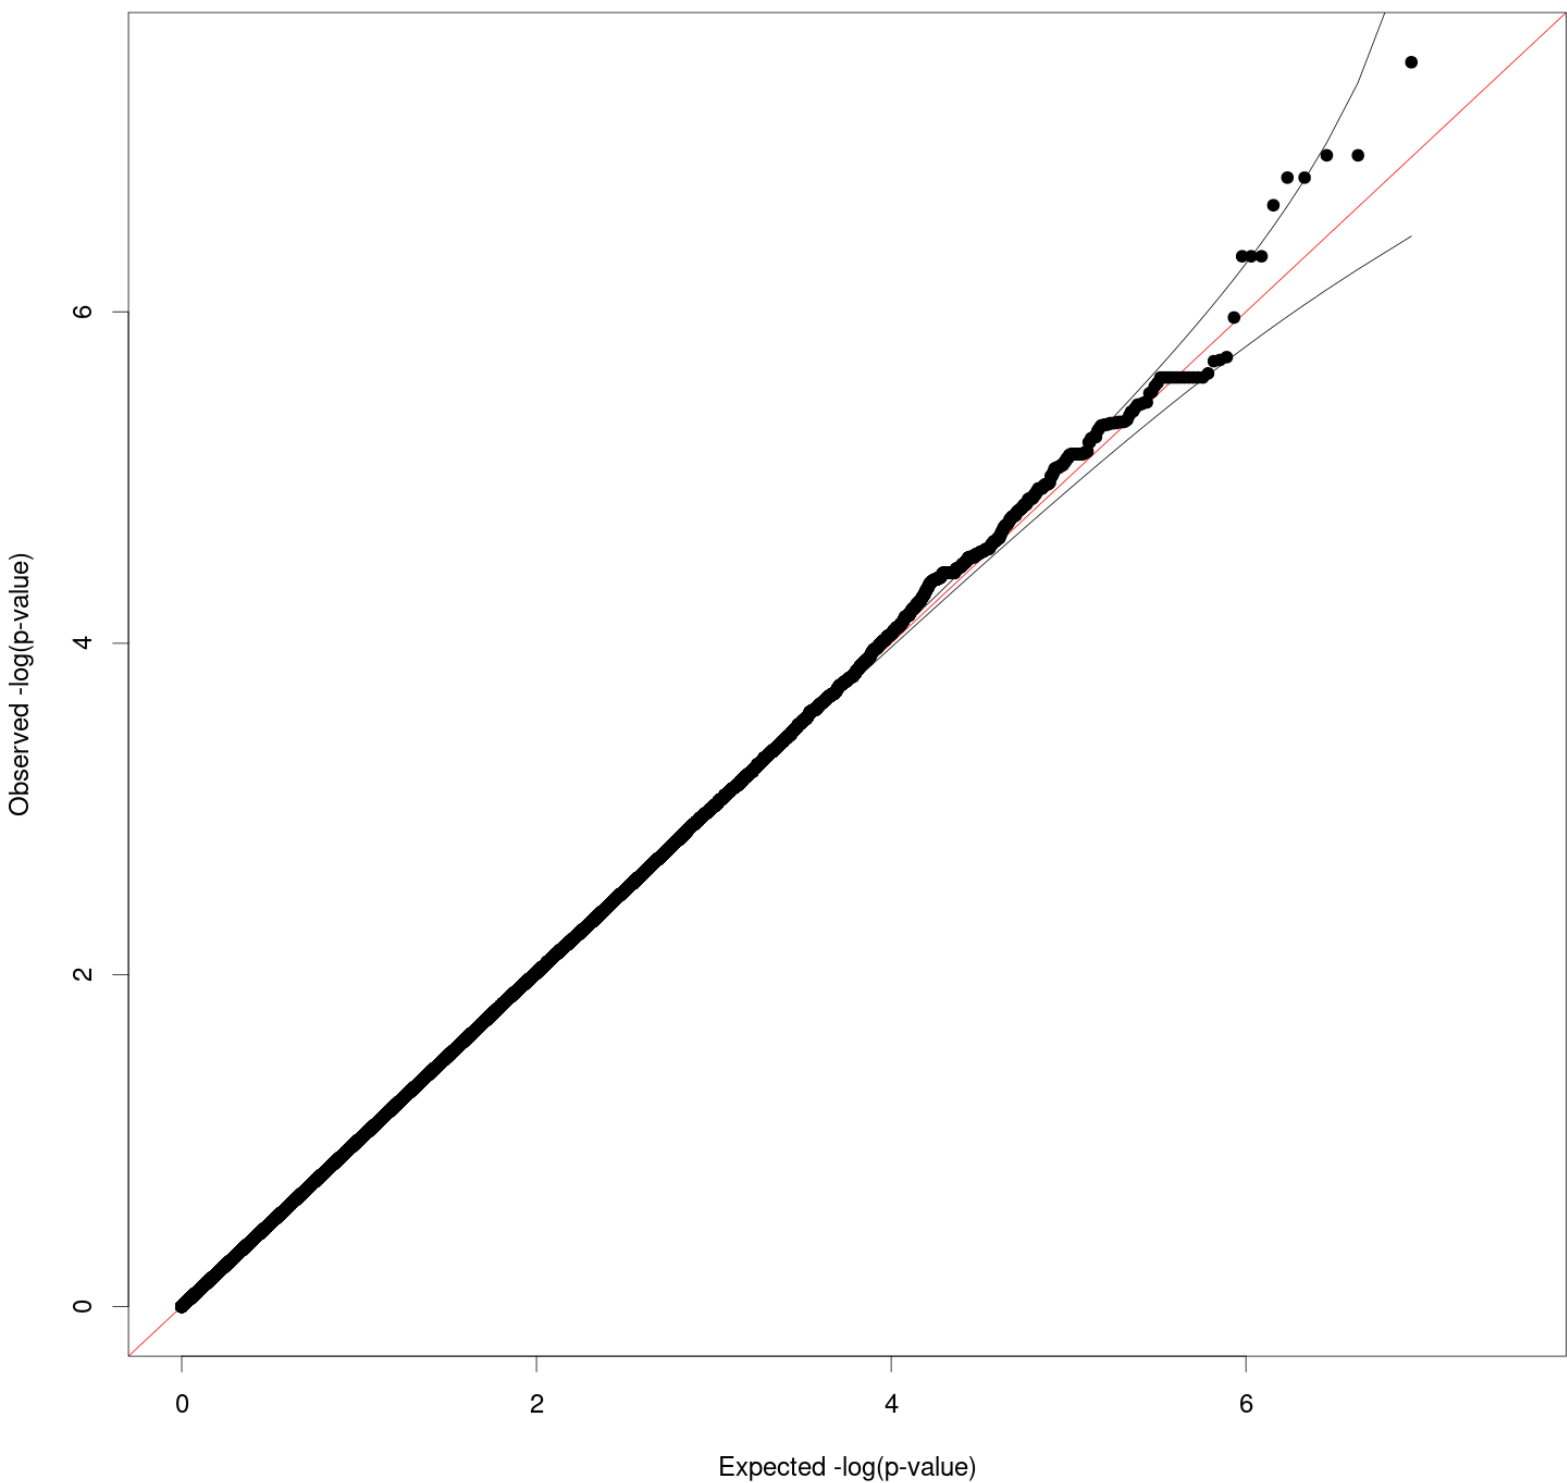

QQ plot for mz89.0244\_t22.1, (s)-lactate  
inflation factor = 0.9944

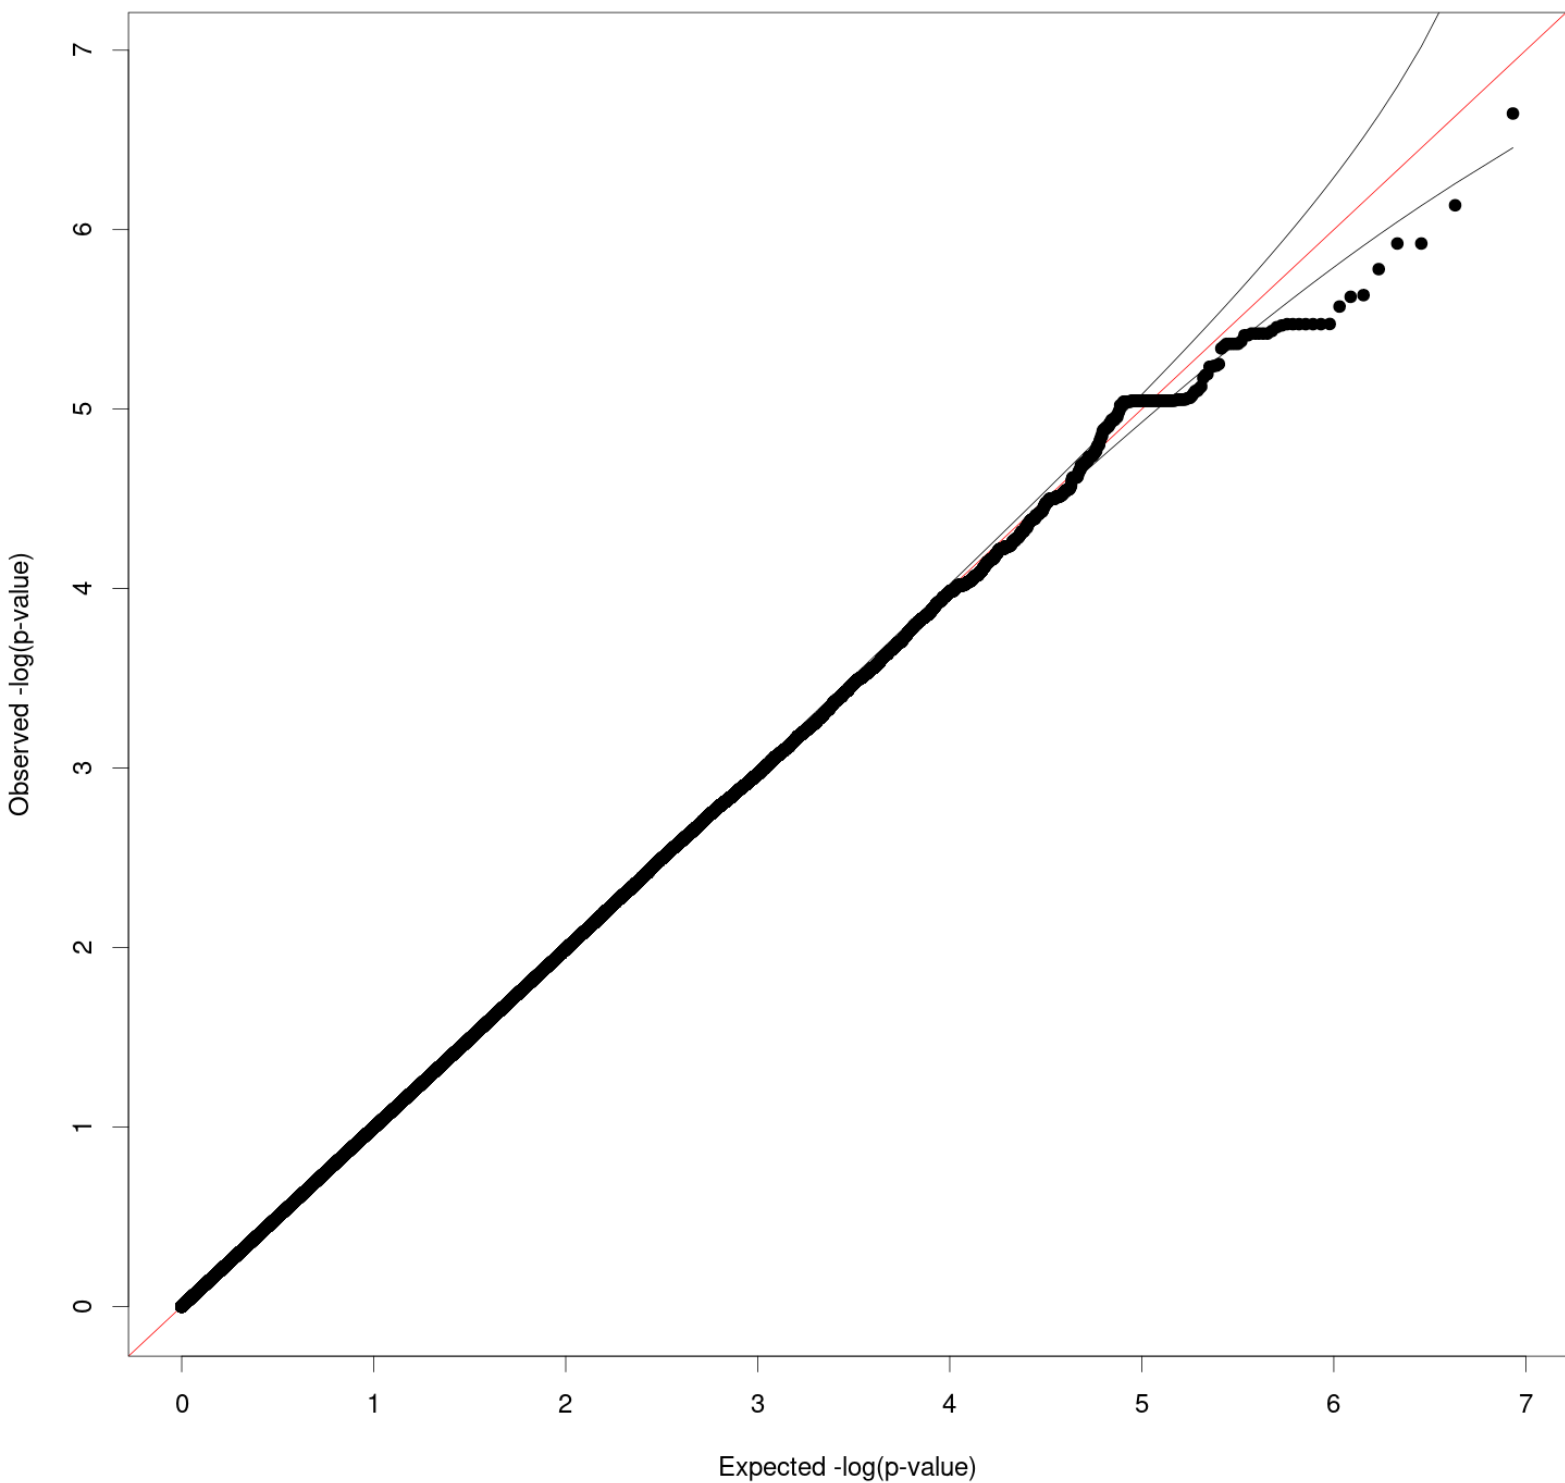

QQ plot for mz90.0551\_t71.3, beta-alanine  
inflation factor = 1.002

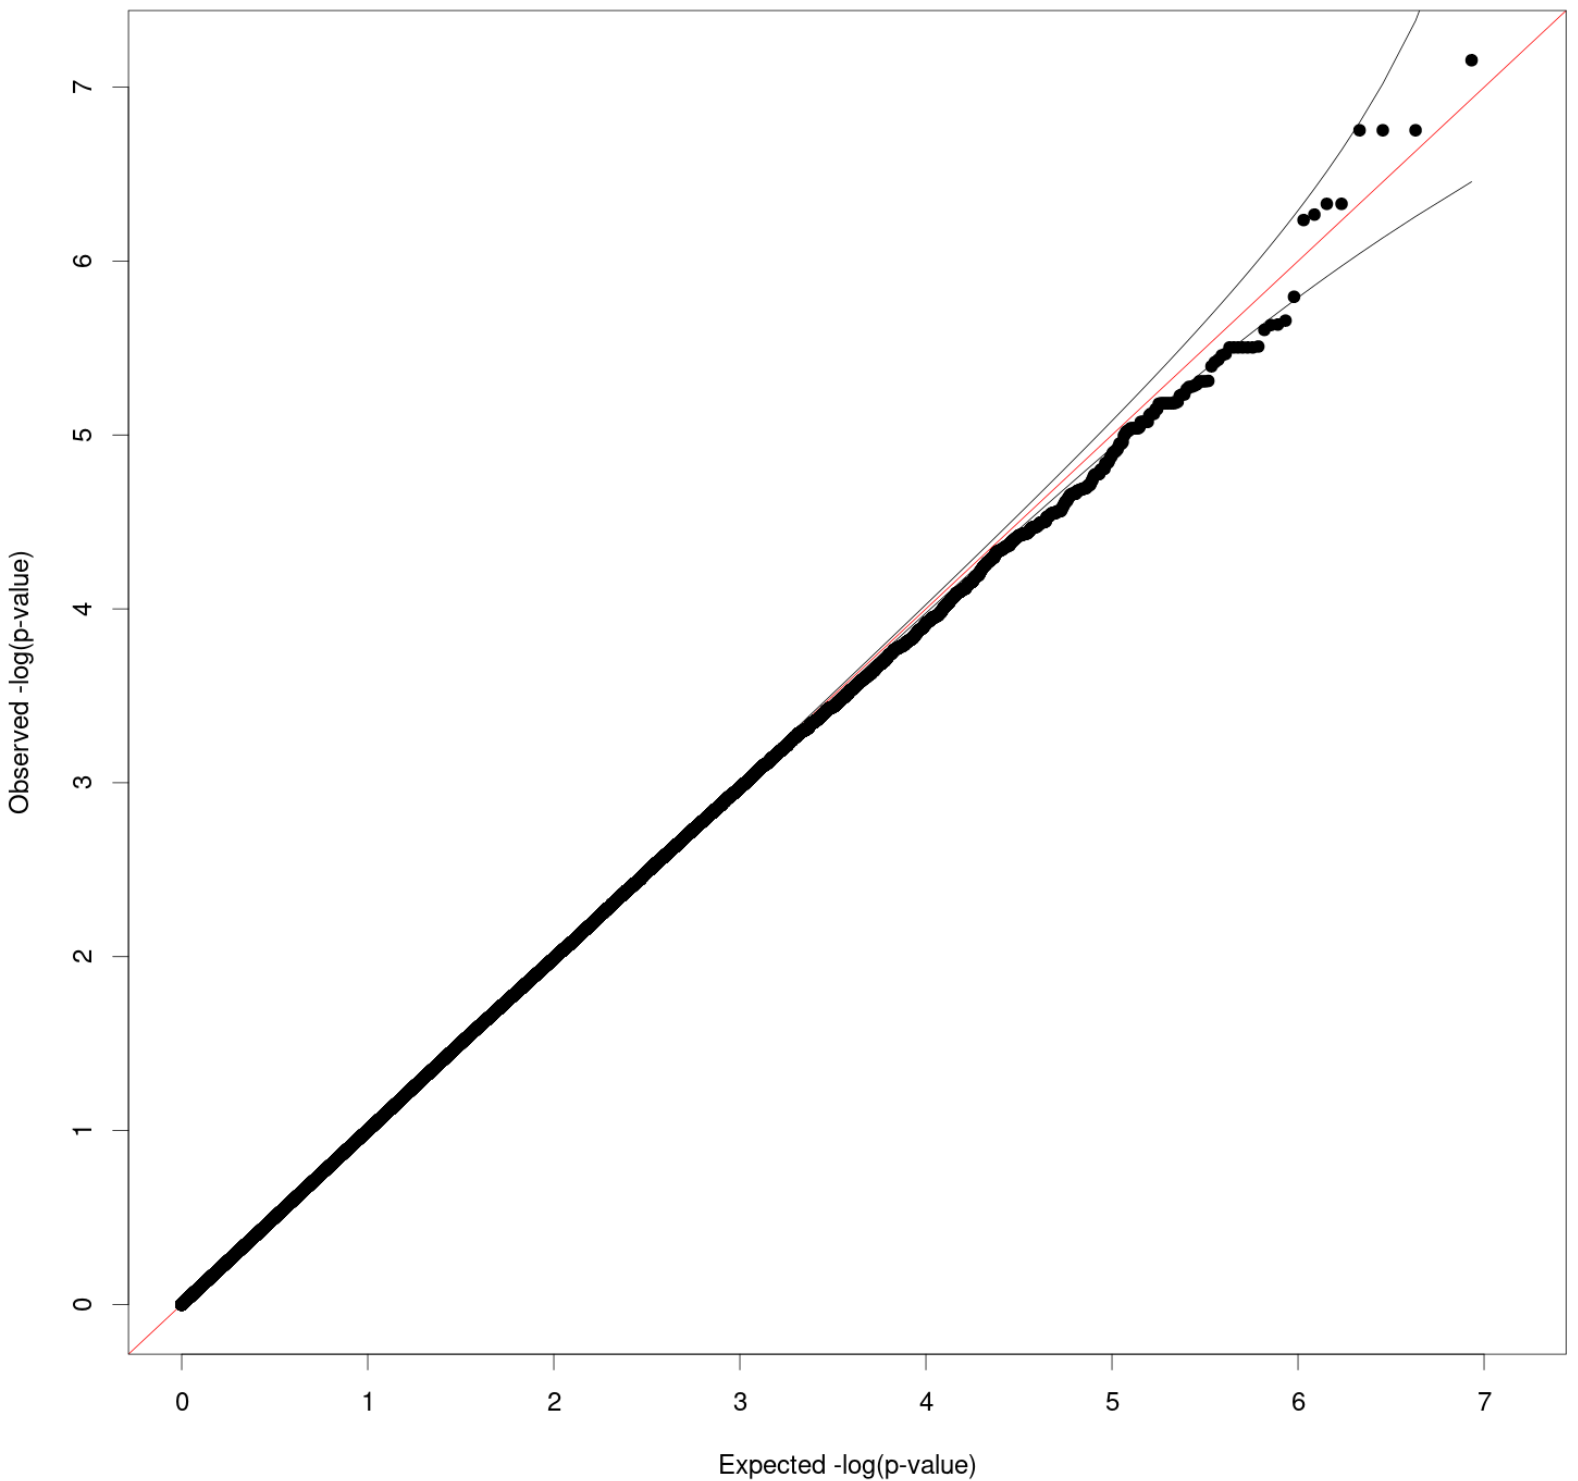

QQ plot for mz94.0653\_t45.9, aniline  
inflation factor = 0.9989

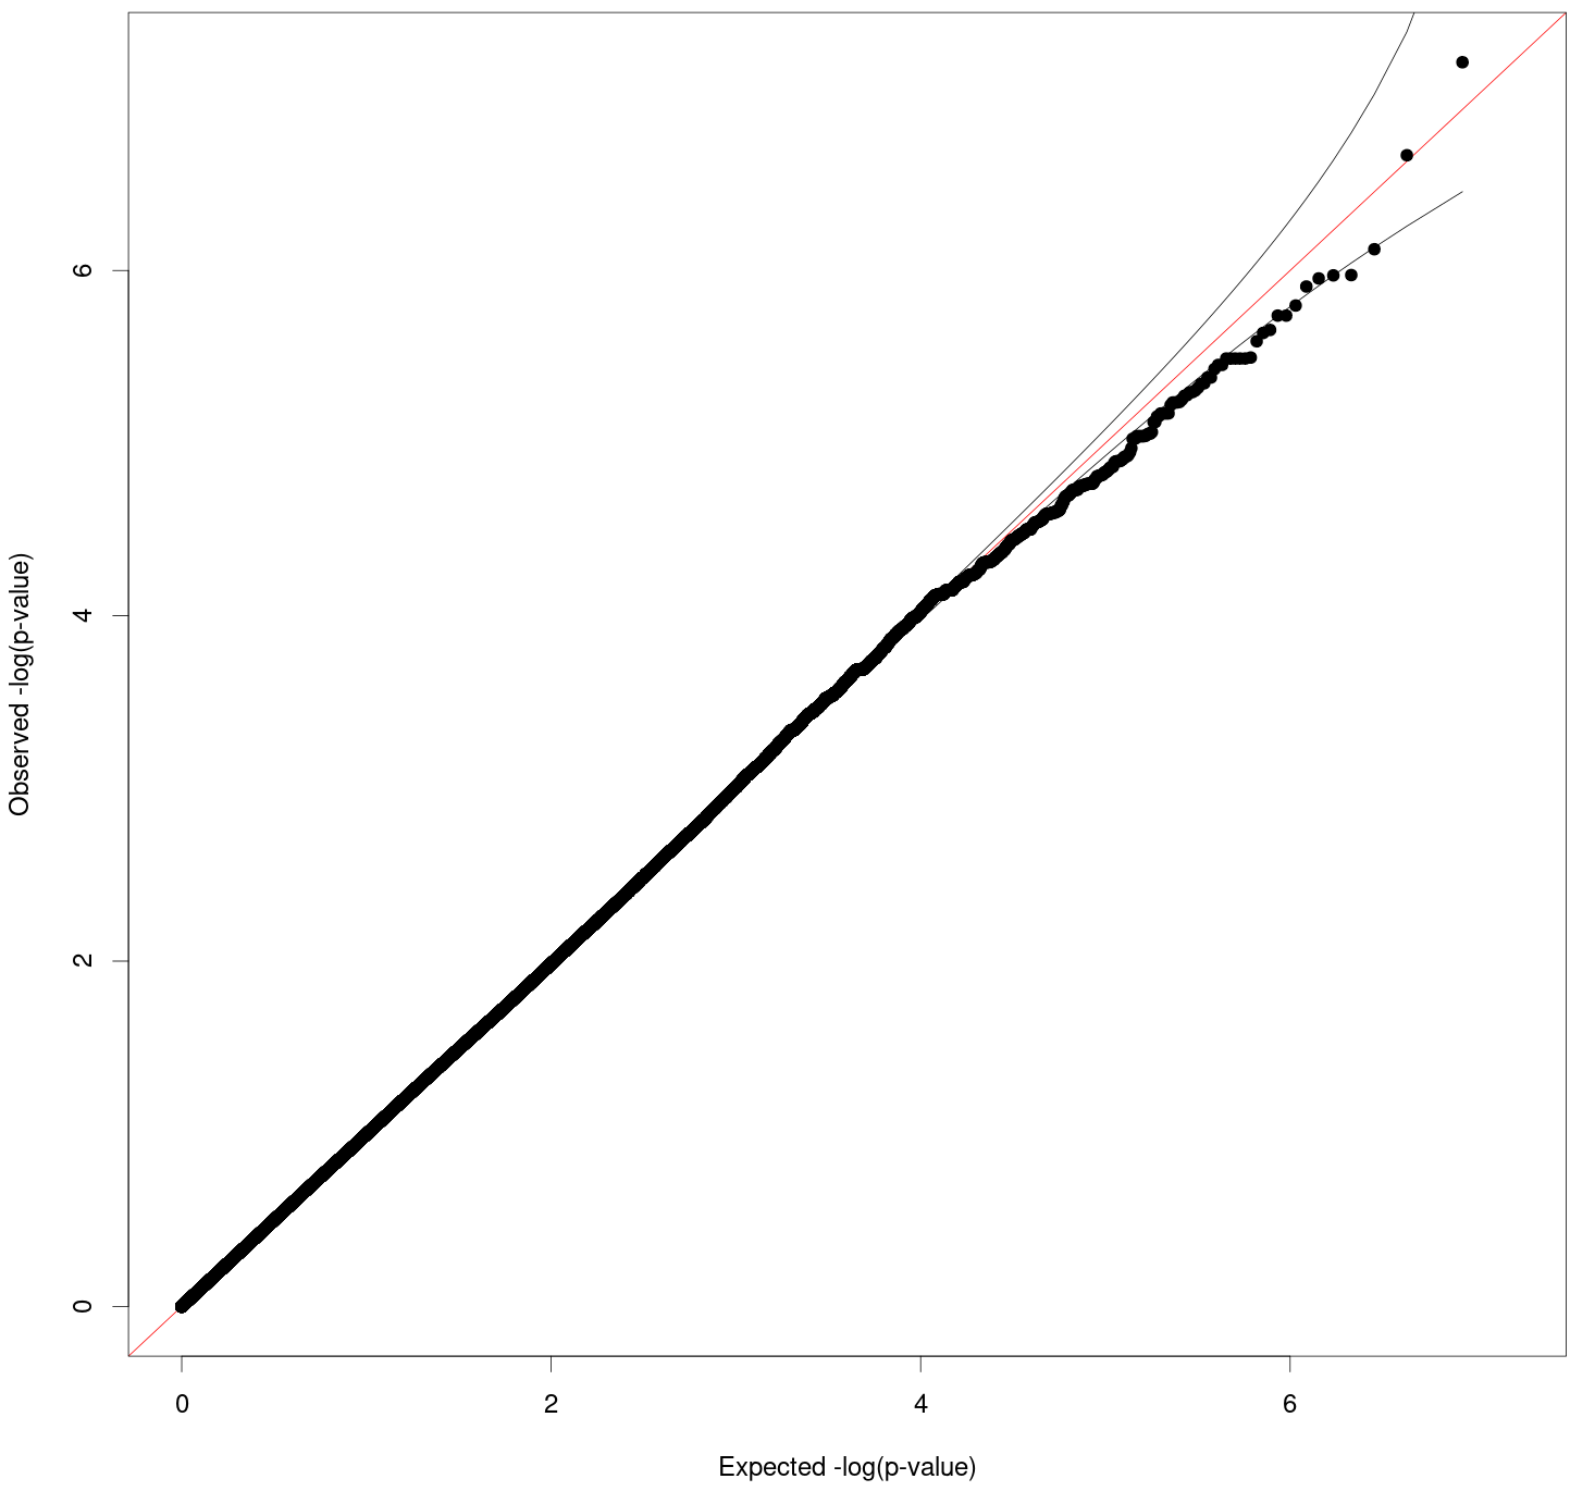



QQ plot for mz96.0445\_t35.3, 2-hydroxypyridine  
inflation factor = 0.9942

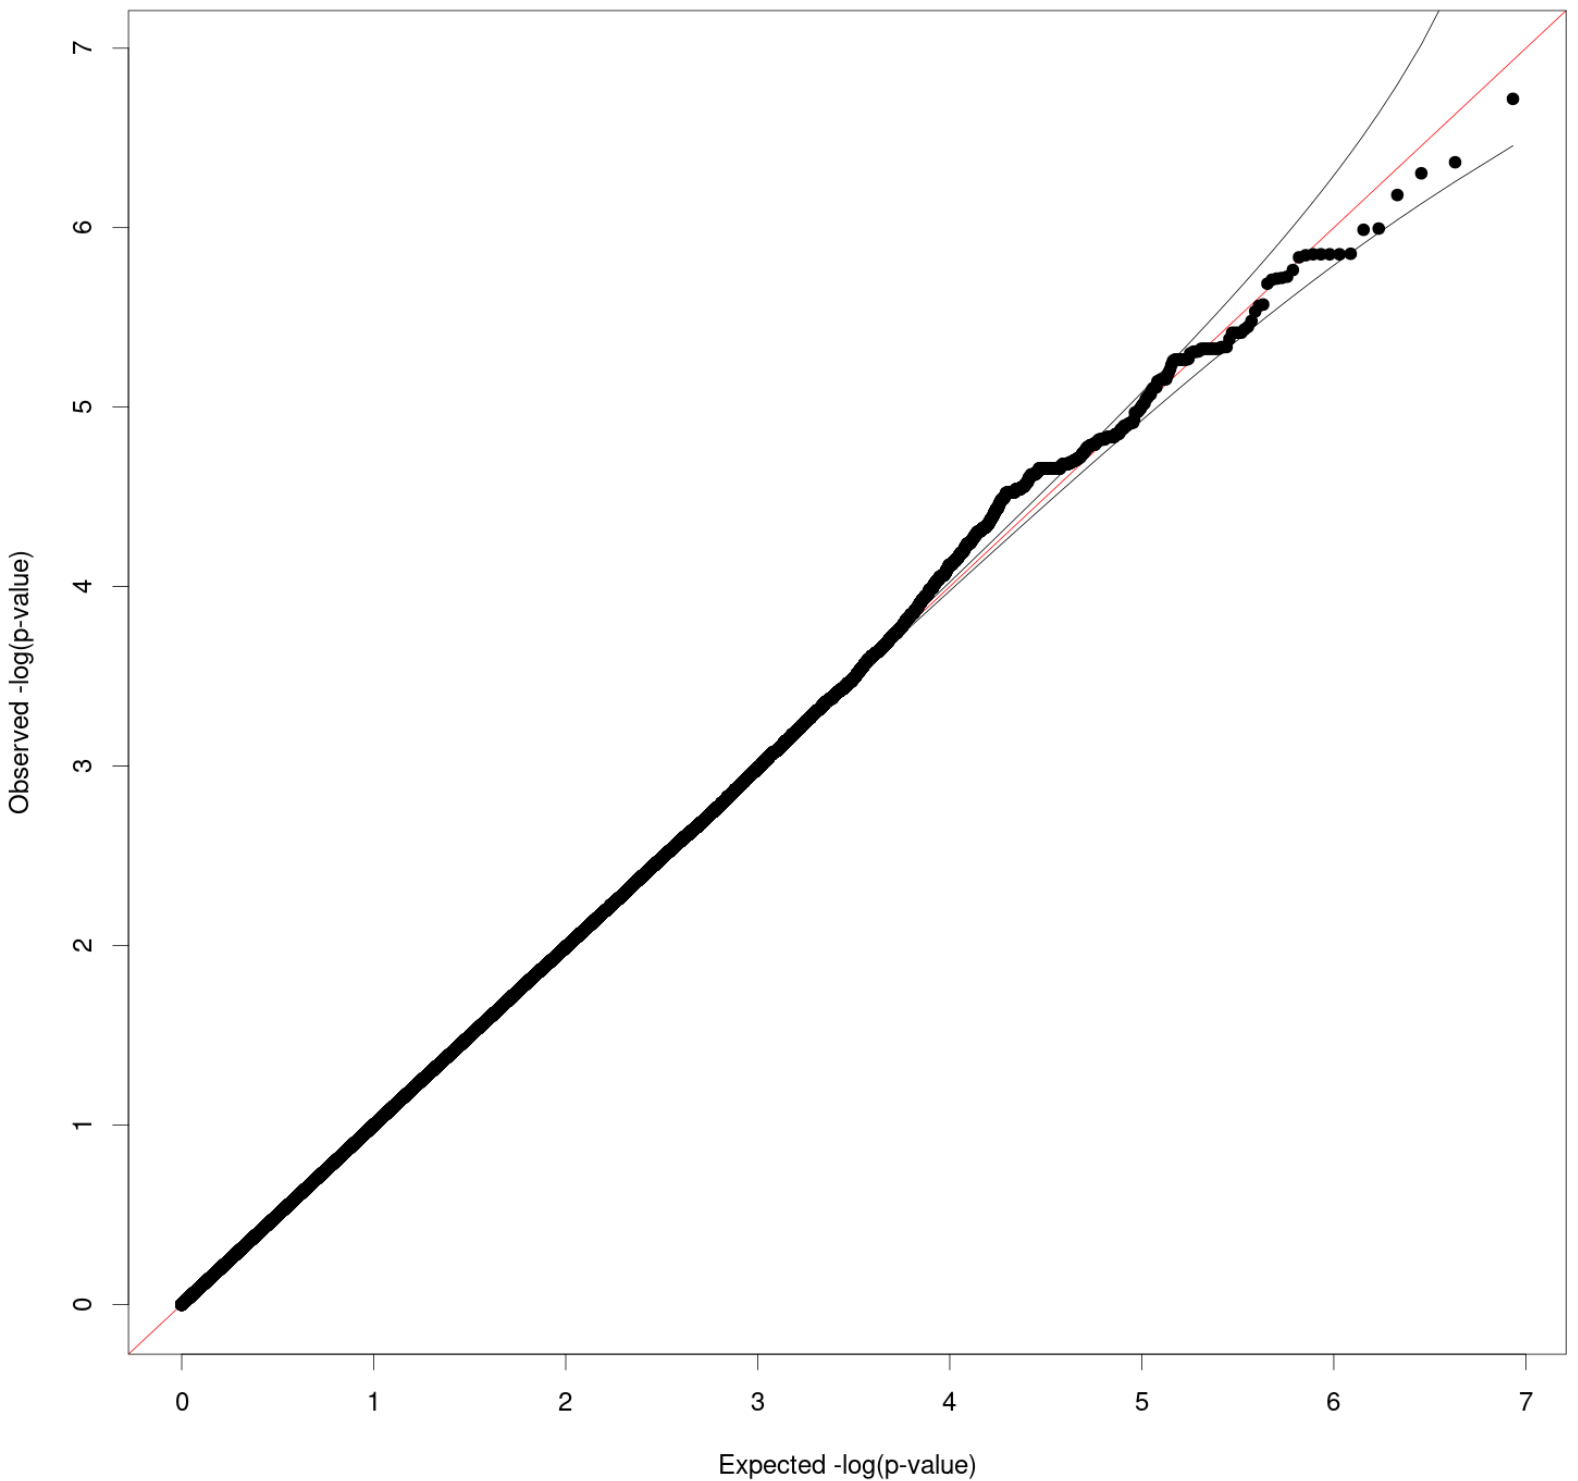

QQ plot for mz101.06\_t20, 5-valerolactone  
inflation factor = 0.9973

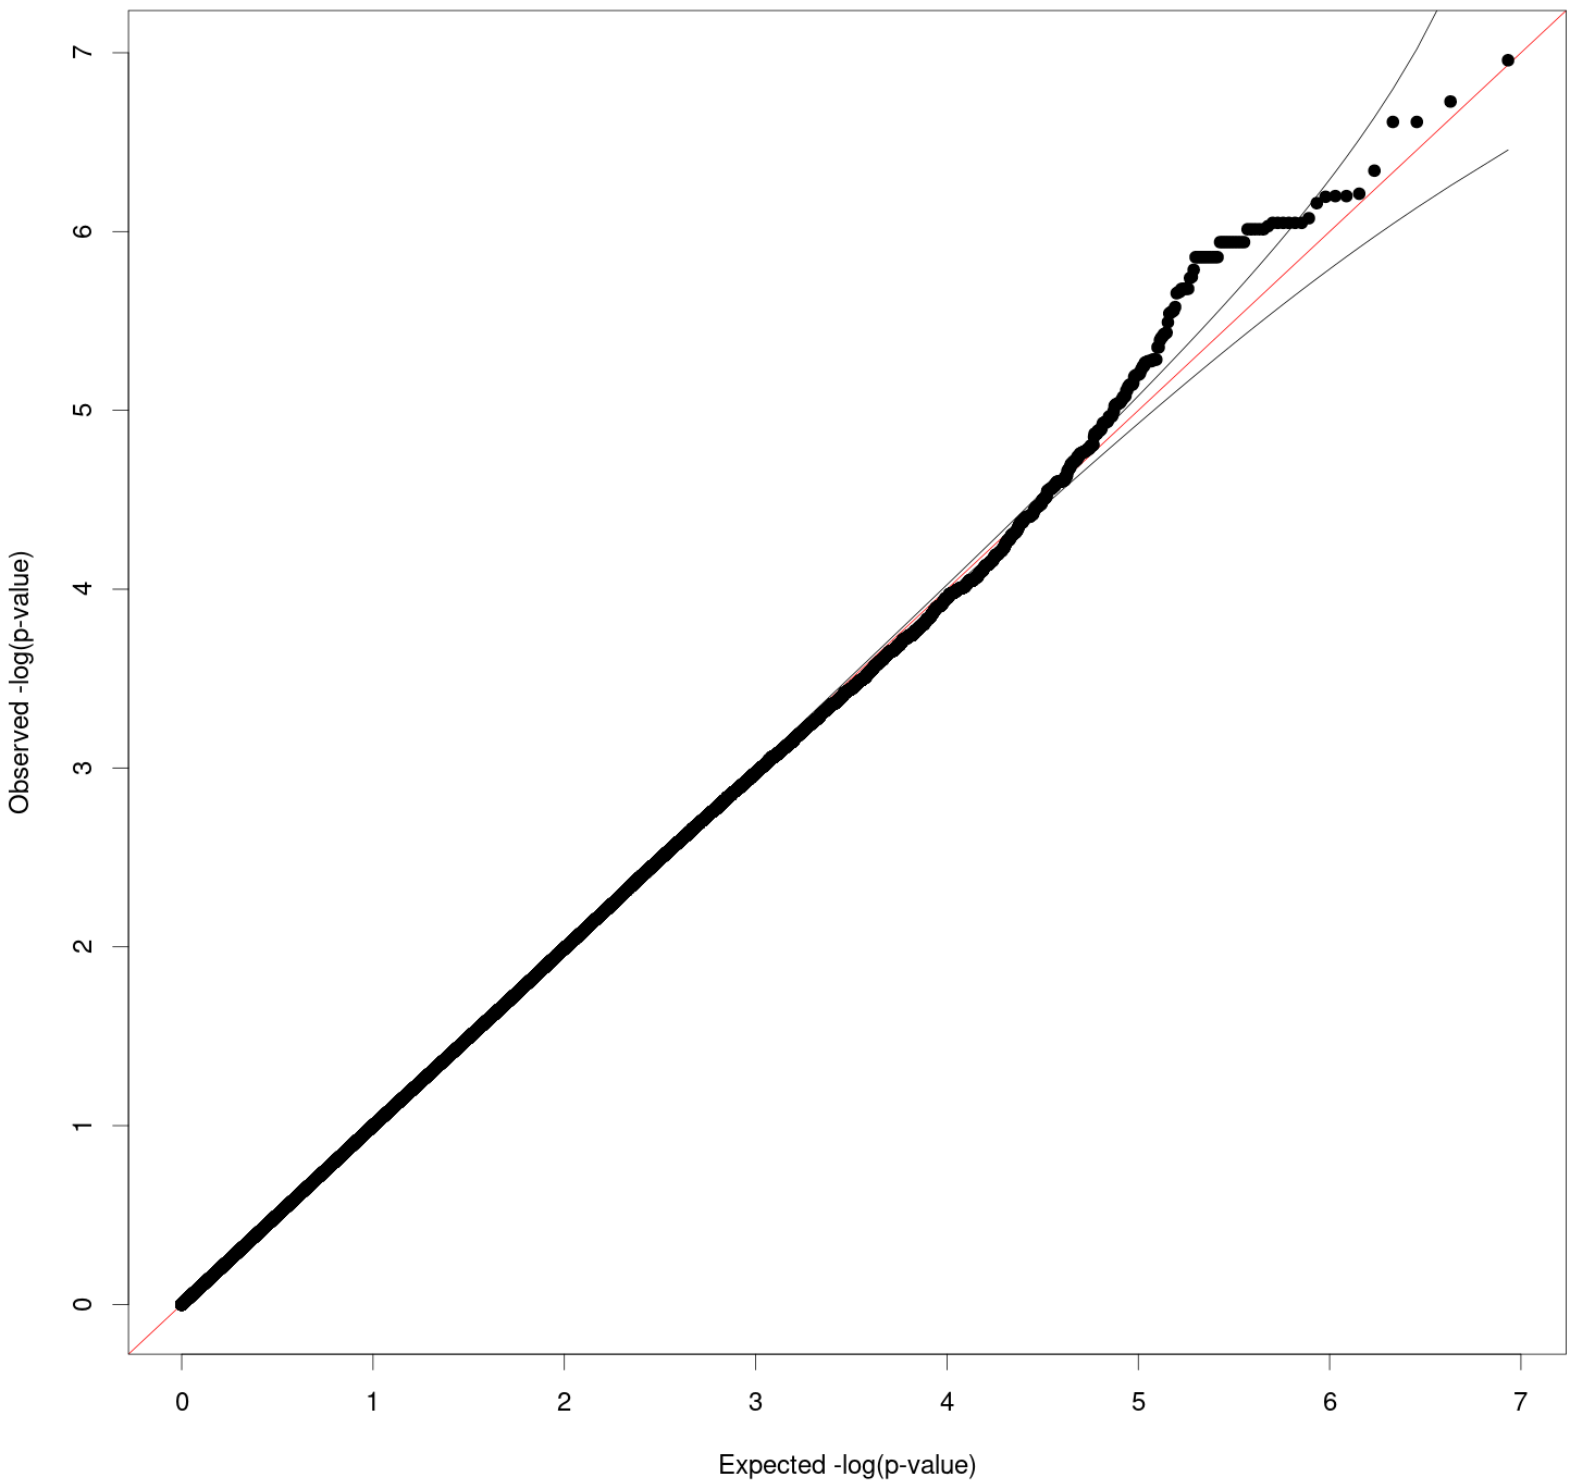

QQ plot for mz102.055\_t78.3, 1-aminocyclopropane-1-carboxylate  
inflation factor = 1.003

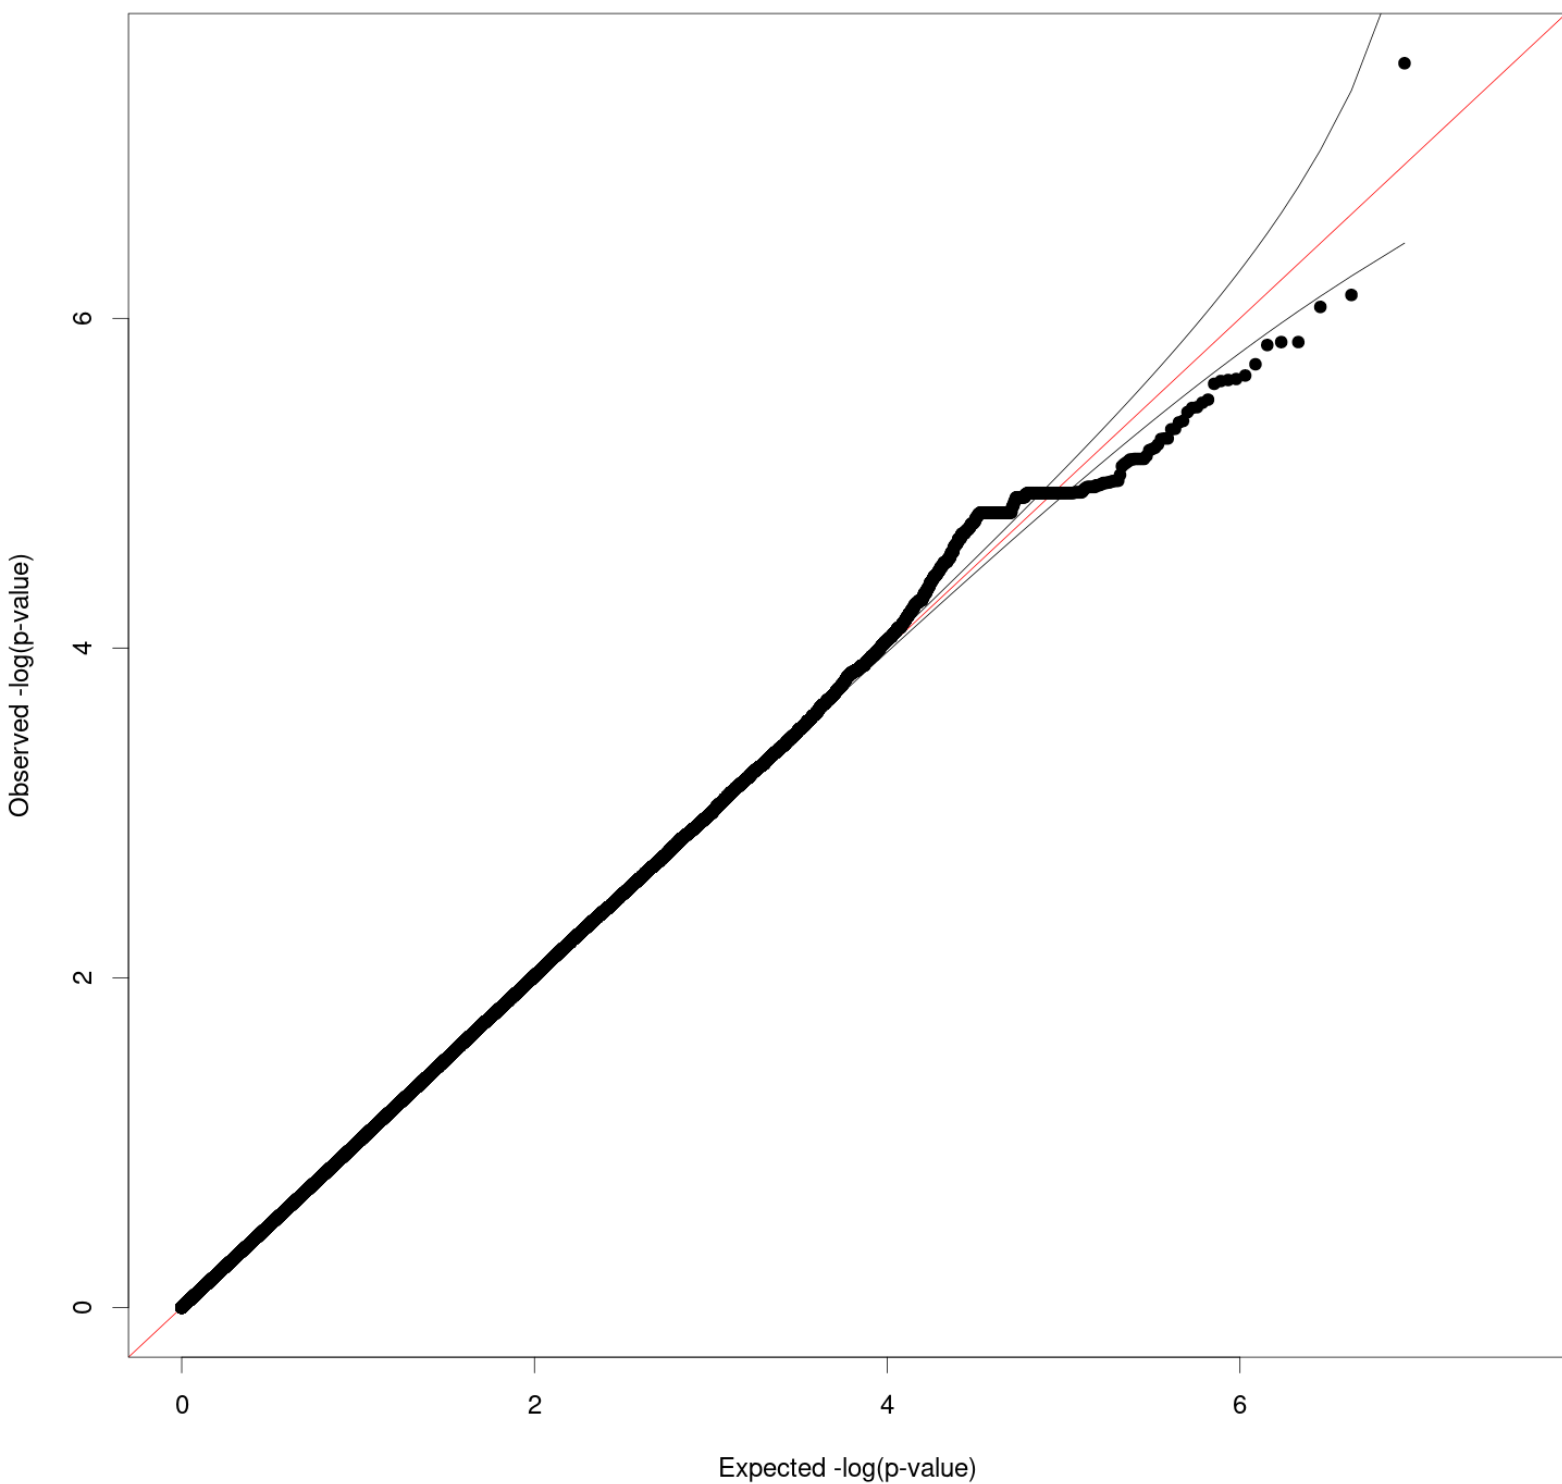

QQ plot for mz103.0035\_t94, malonate  
inflation factor = 0.9965

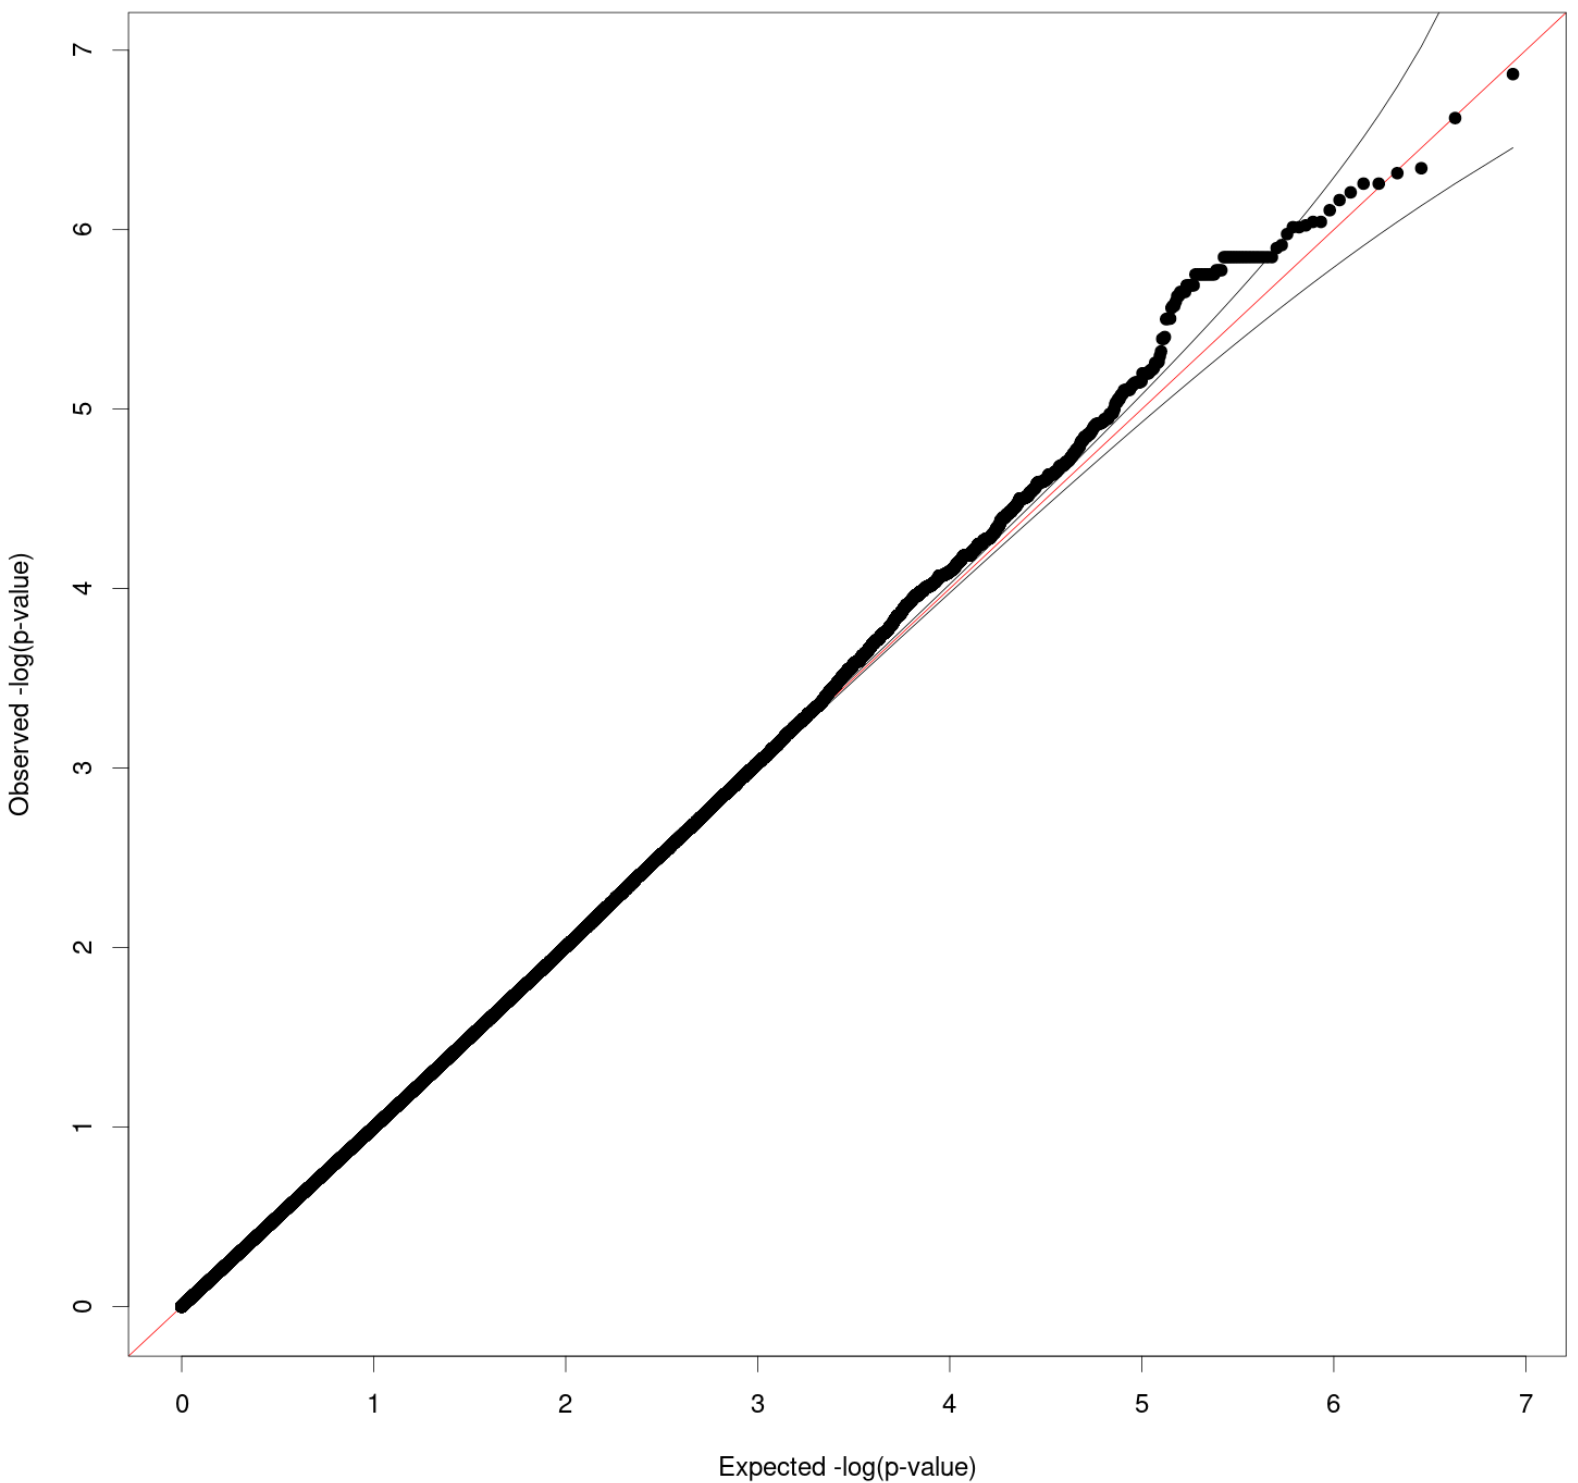

QQ plot for mz103.0391\_t80.3, 2-oxobutanoate  
inflation factor = 1.005

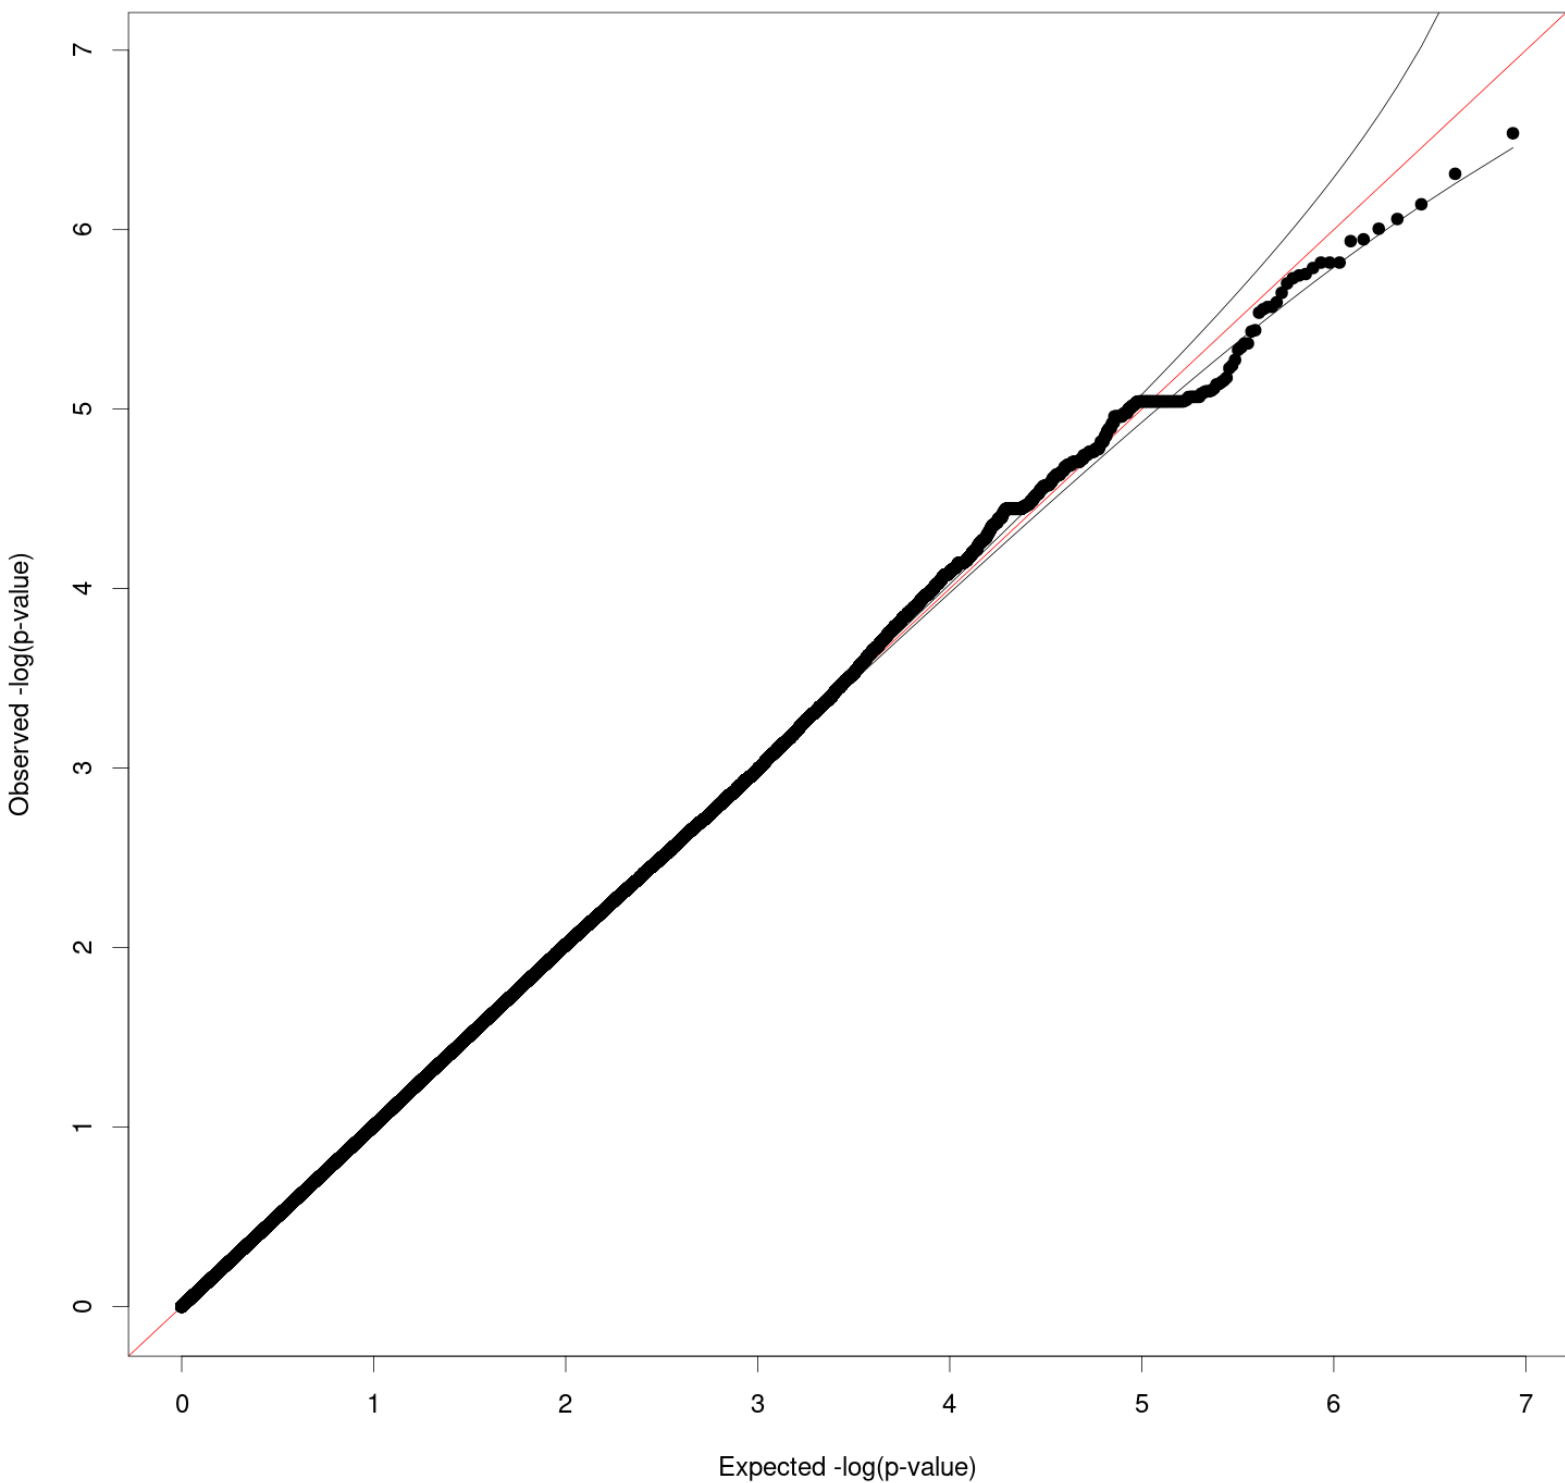

QQ plot for mz104.0351\_t26.8, serine  
inflation factor = 0.9898

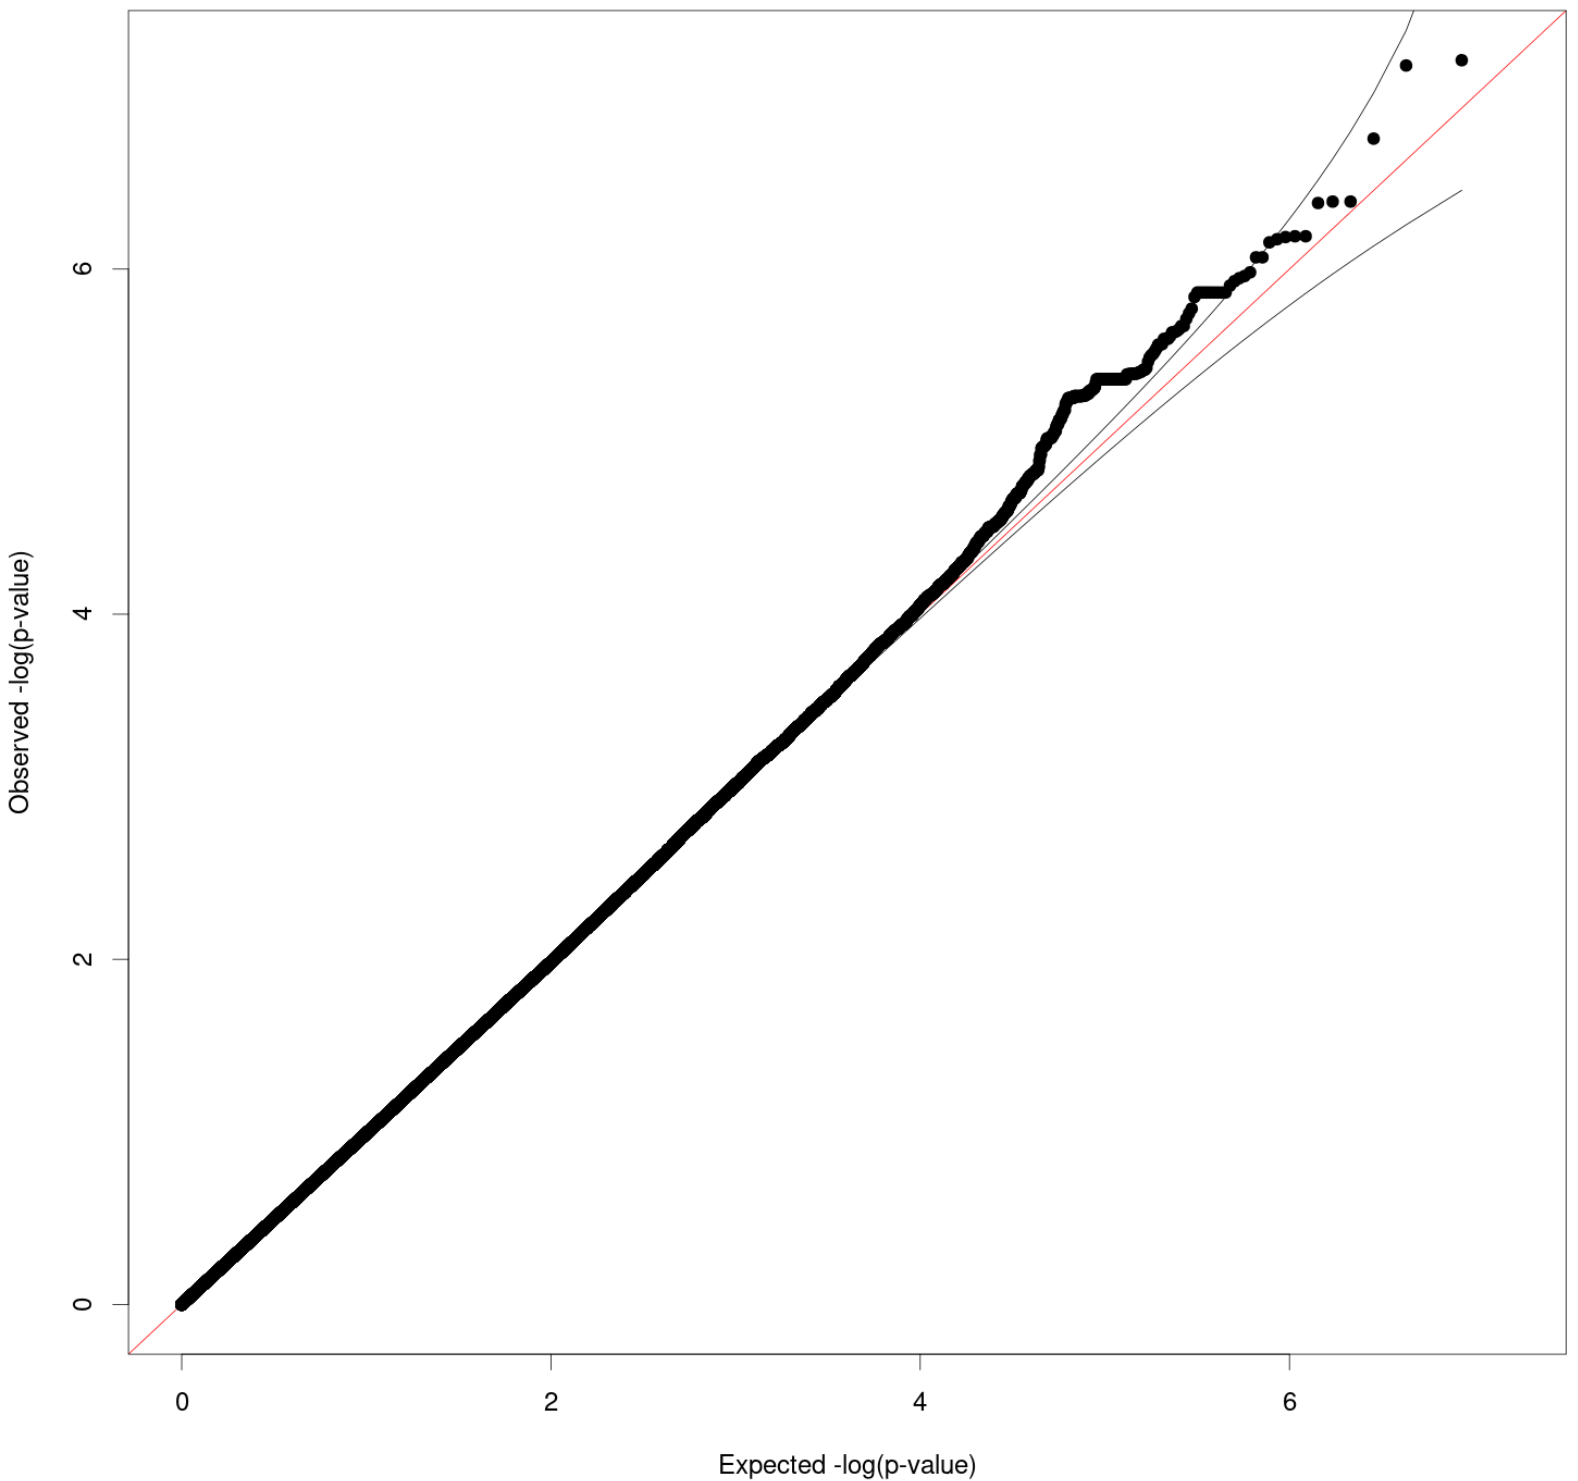

QQ plot for mz105.0193\_t22.9, glycerate  
inflation factor = 0.9999

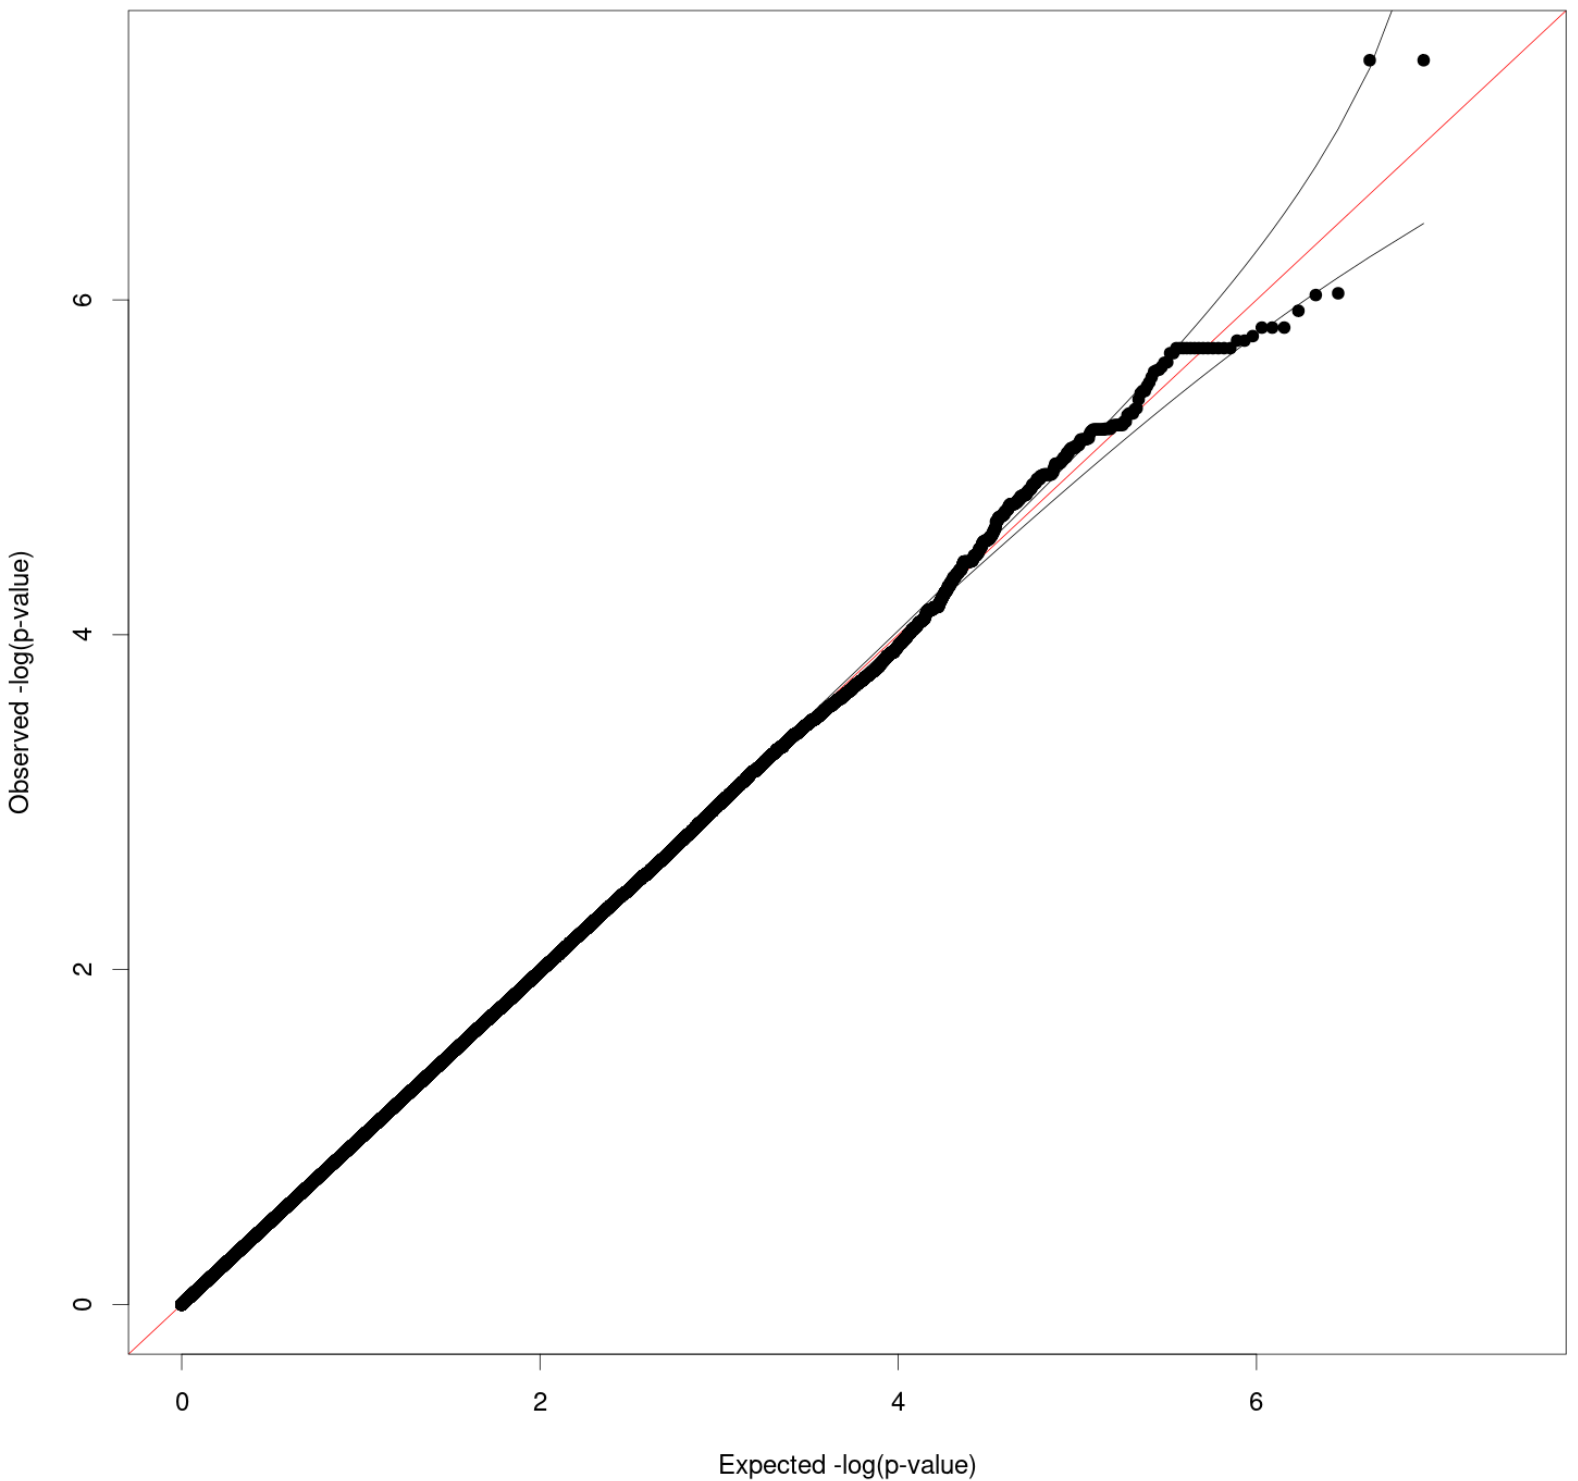

QQ plot for mz106.05\_t115, serine  
inflation factor = 0.9912

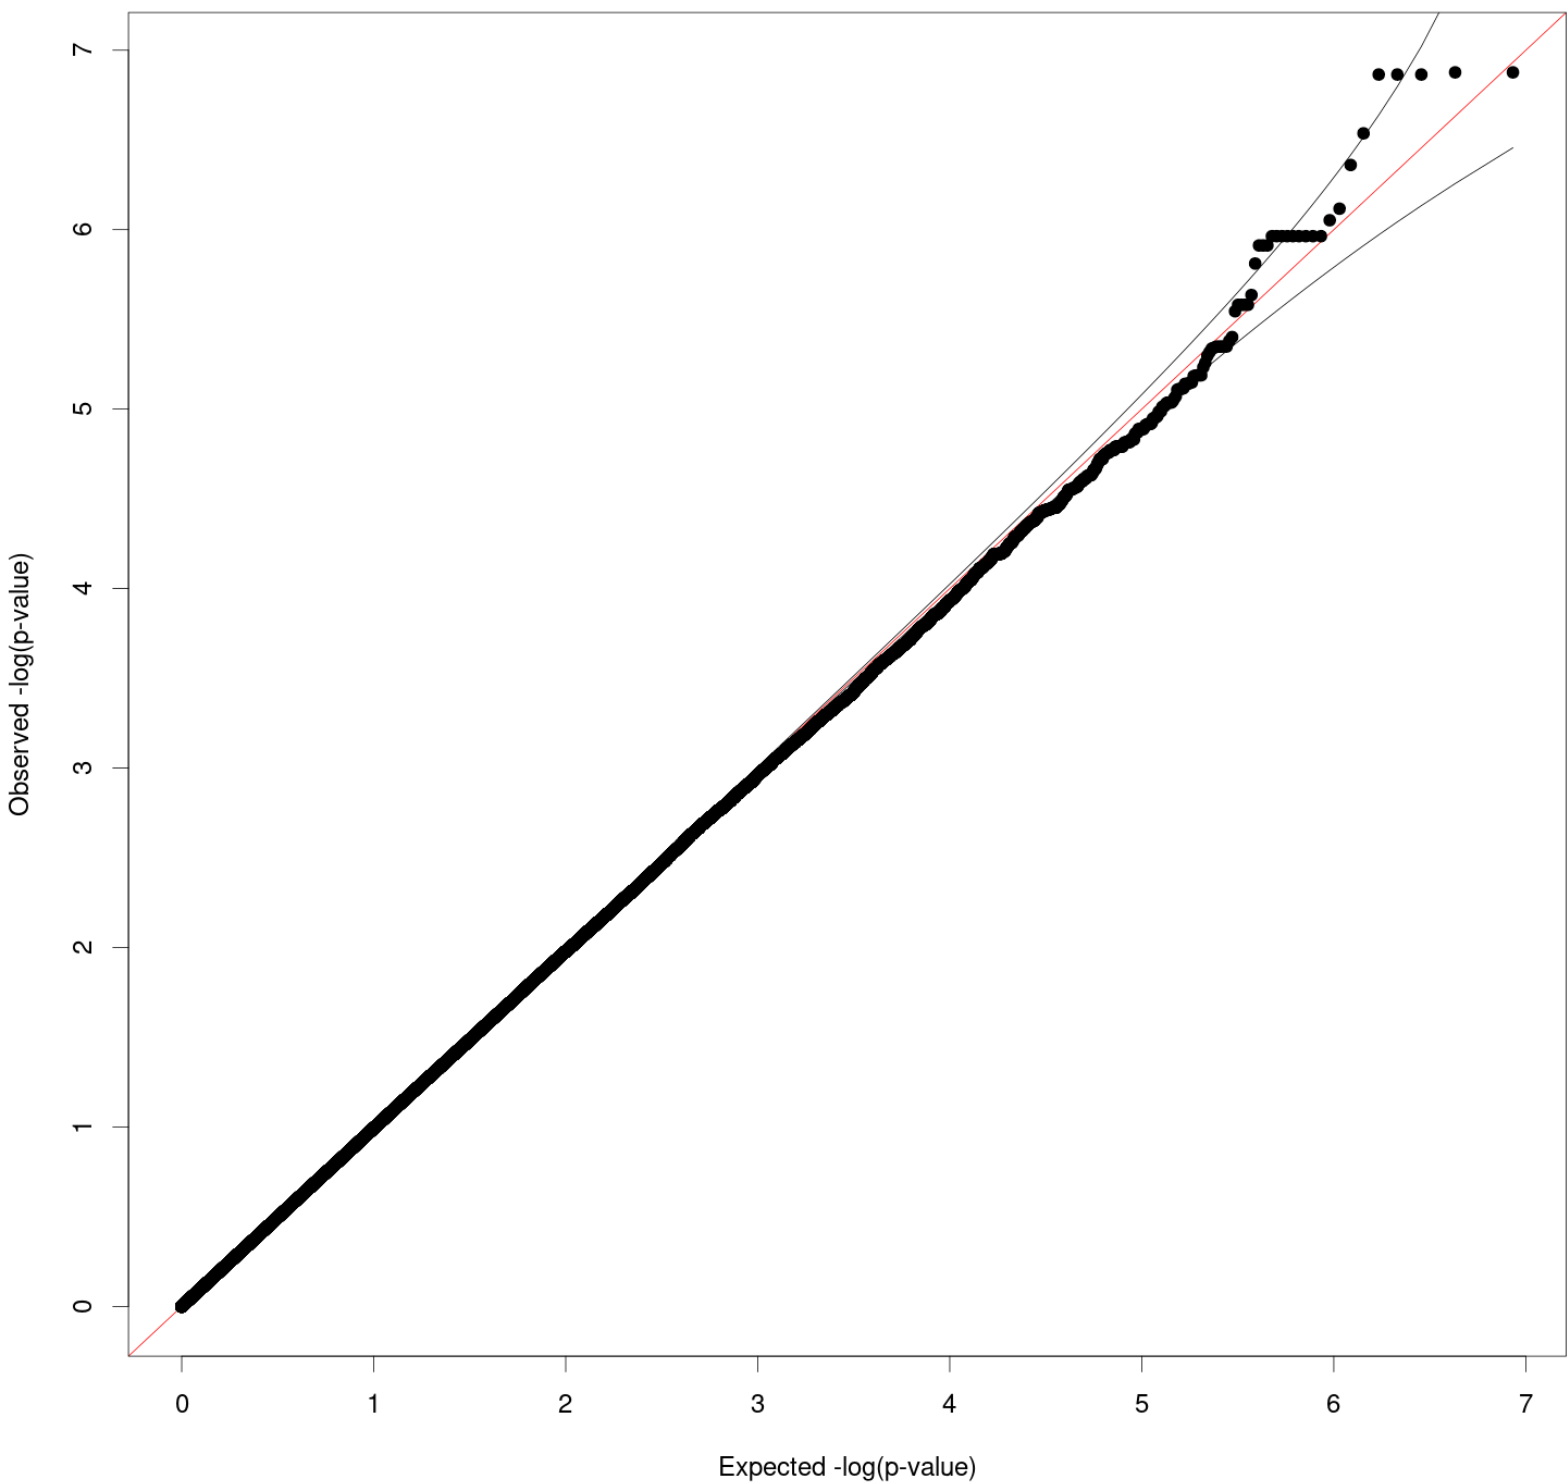



QQ plot for mz110.0272\_t66.7, hypotaurine  
inflation factor = 0.9994

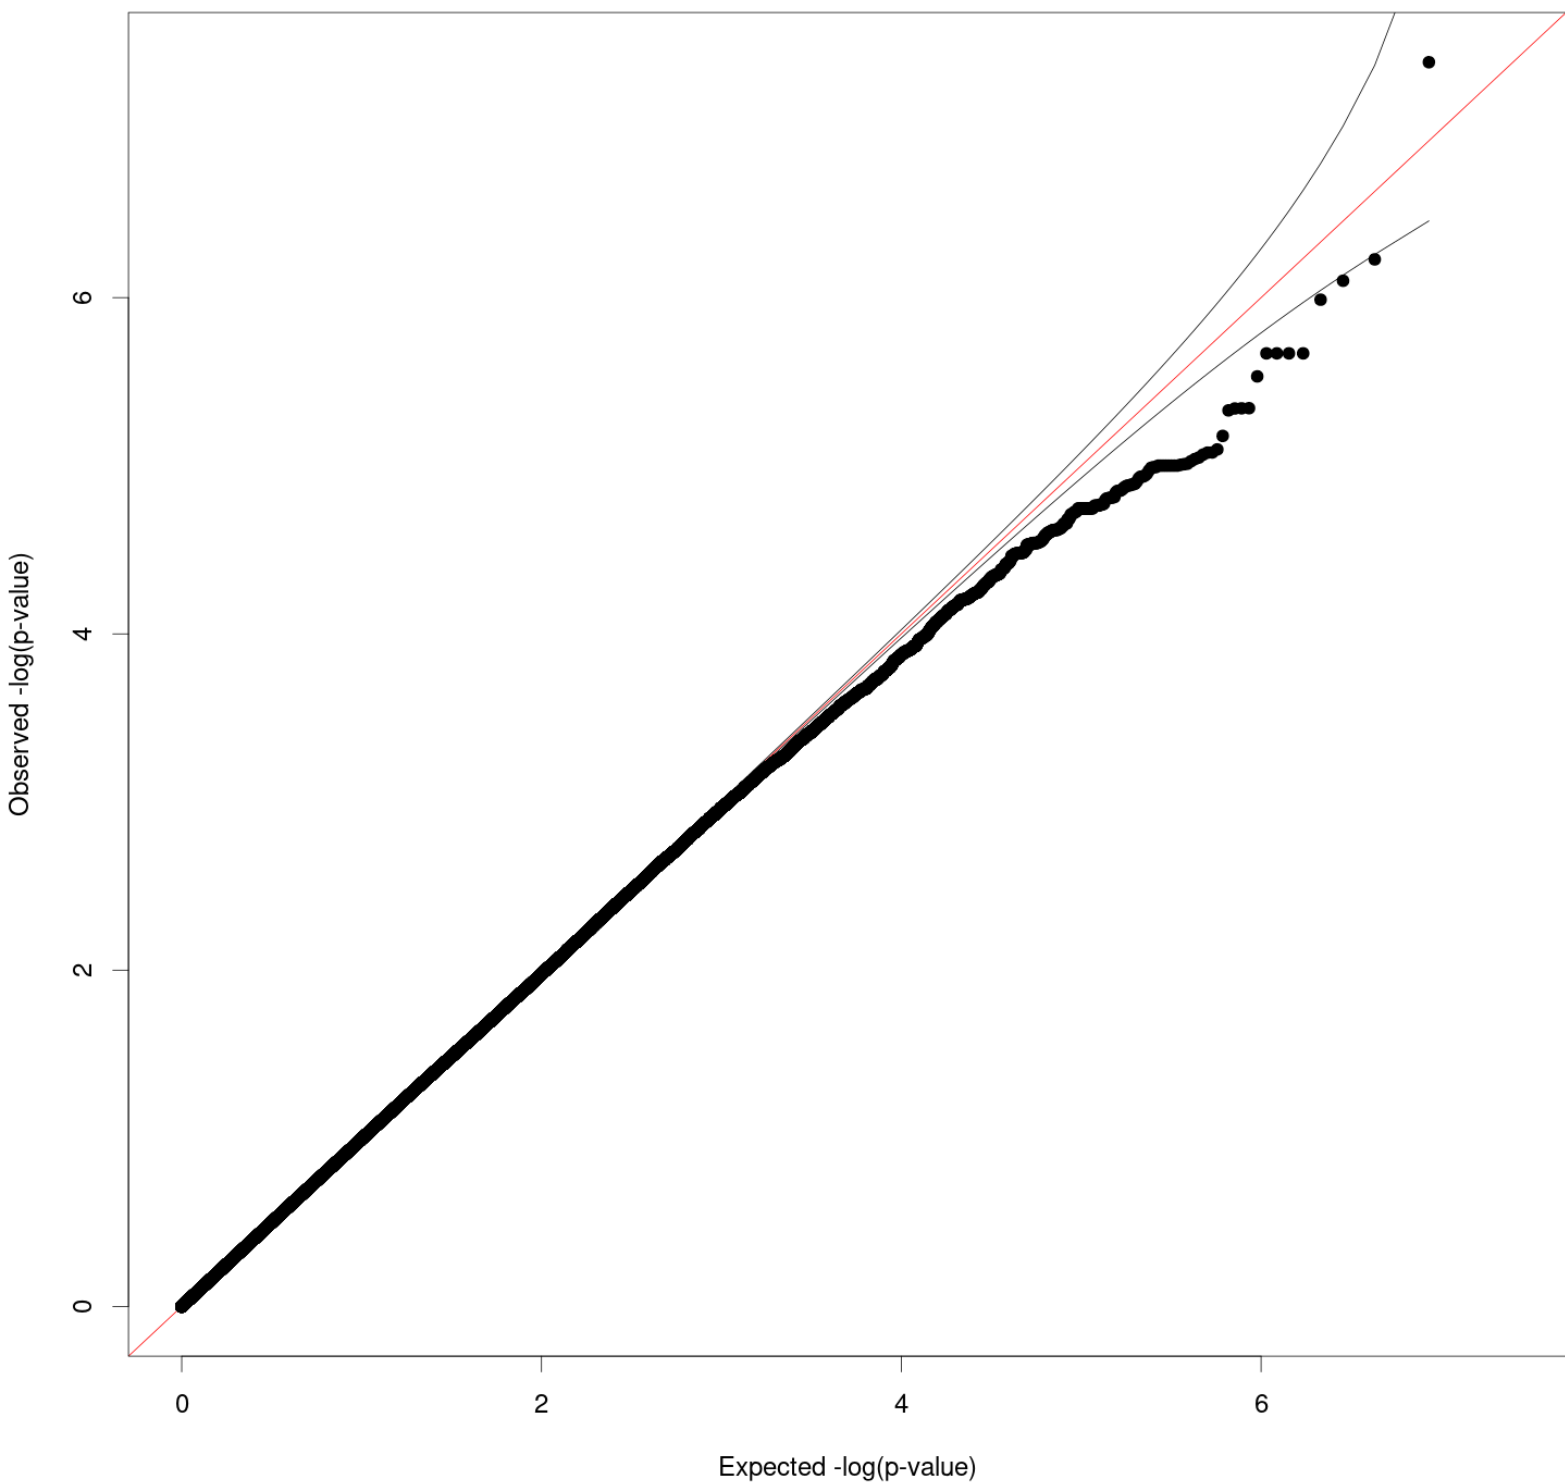

QQ plot for mz112.0516\_t24.7, creatinine  
inflation factor = 1.005

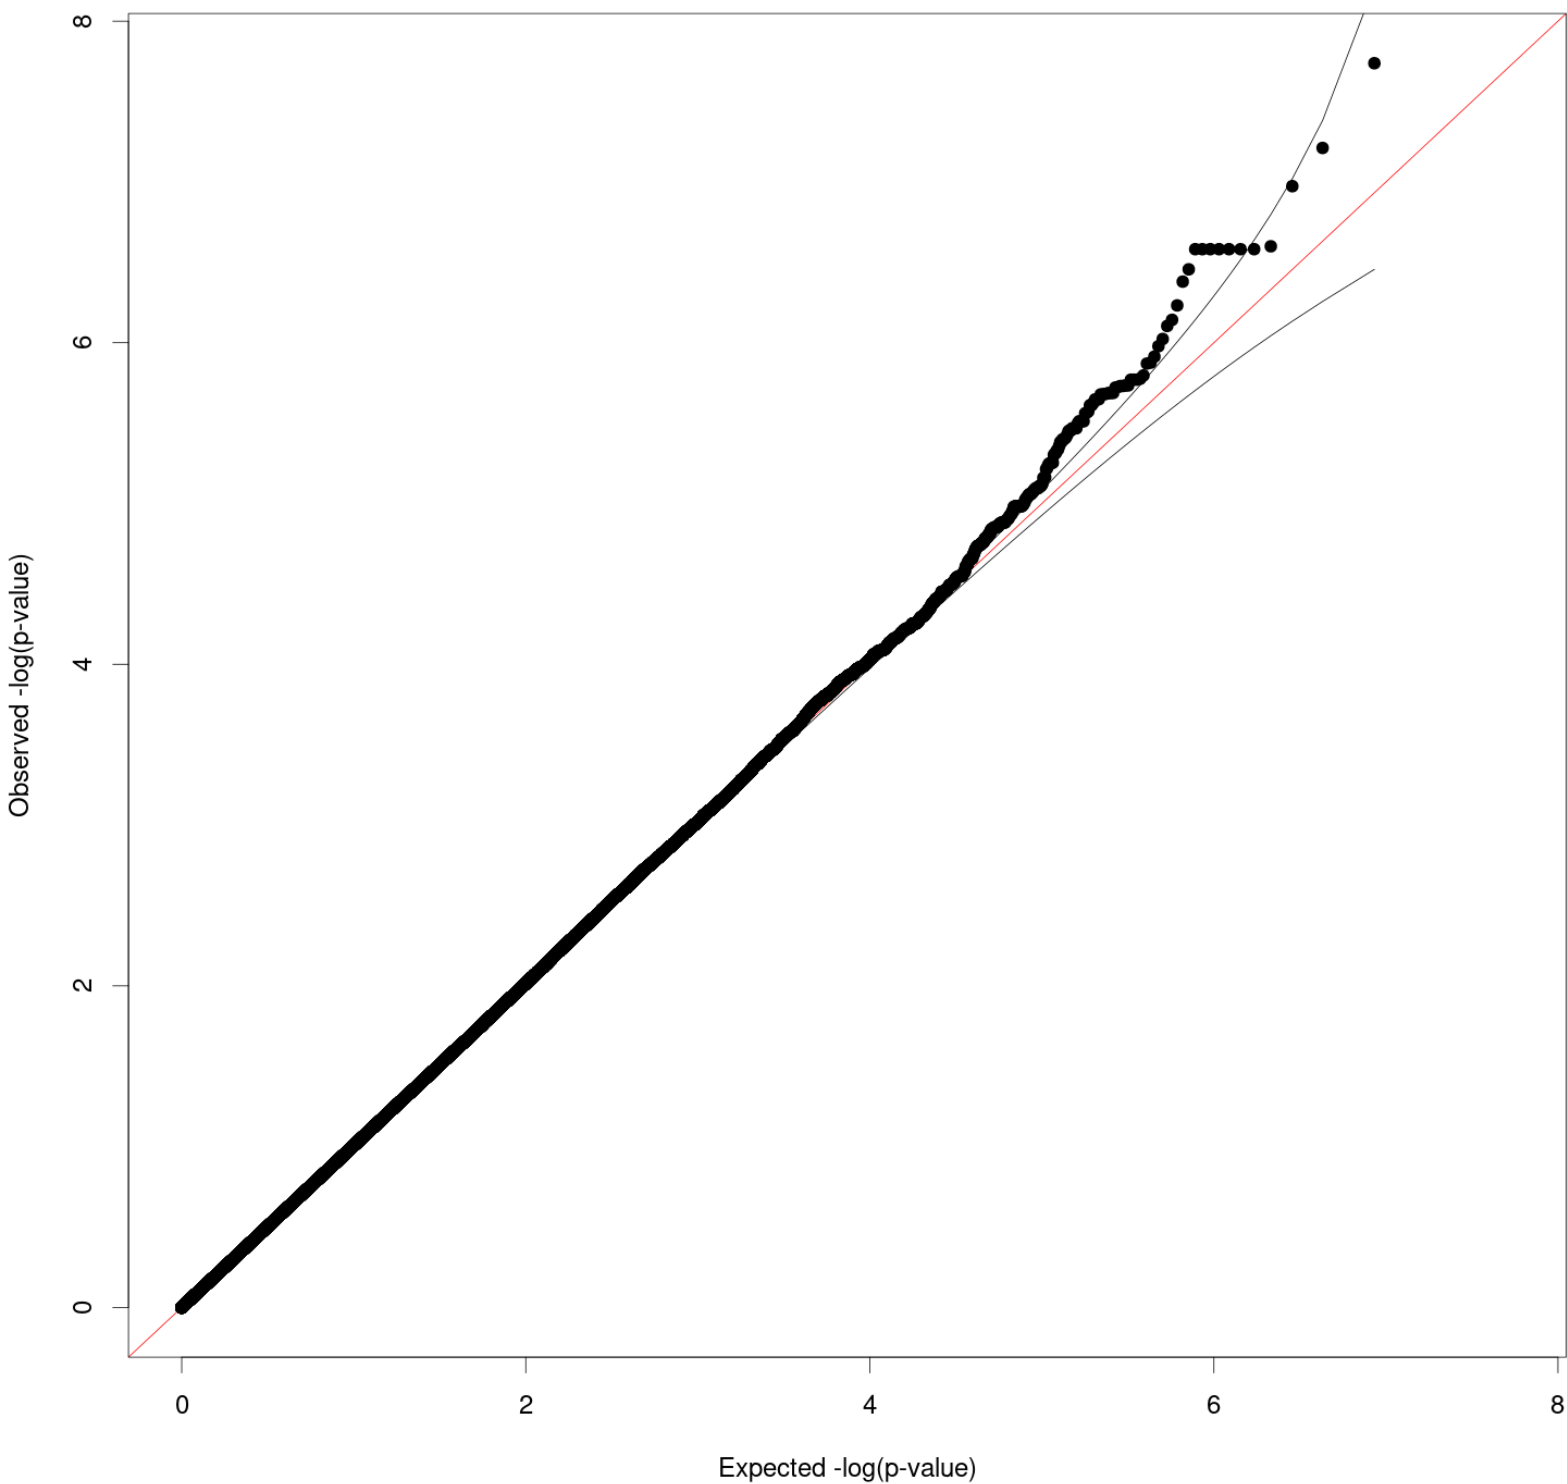

QQ plot for mz113.0347\_t39.3, uracil  
inflation factor = 0.9986

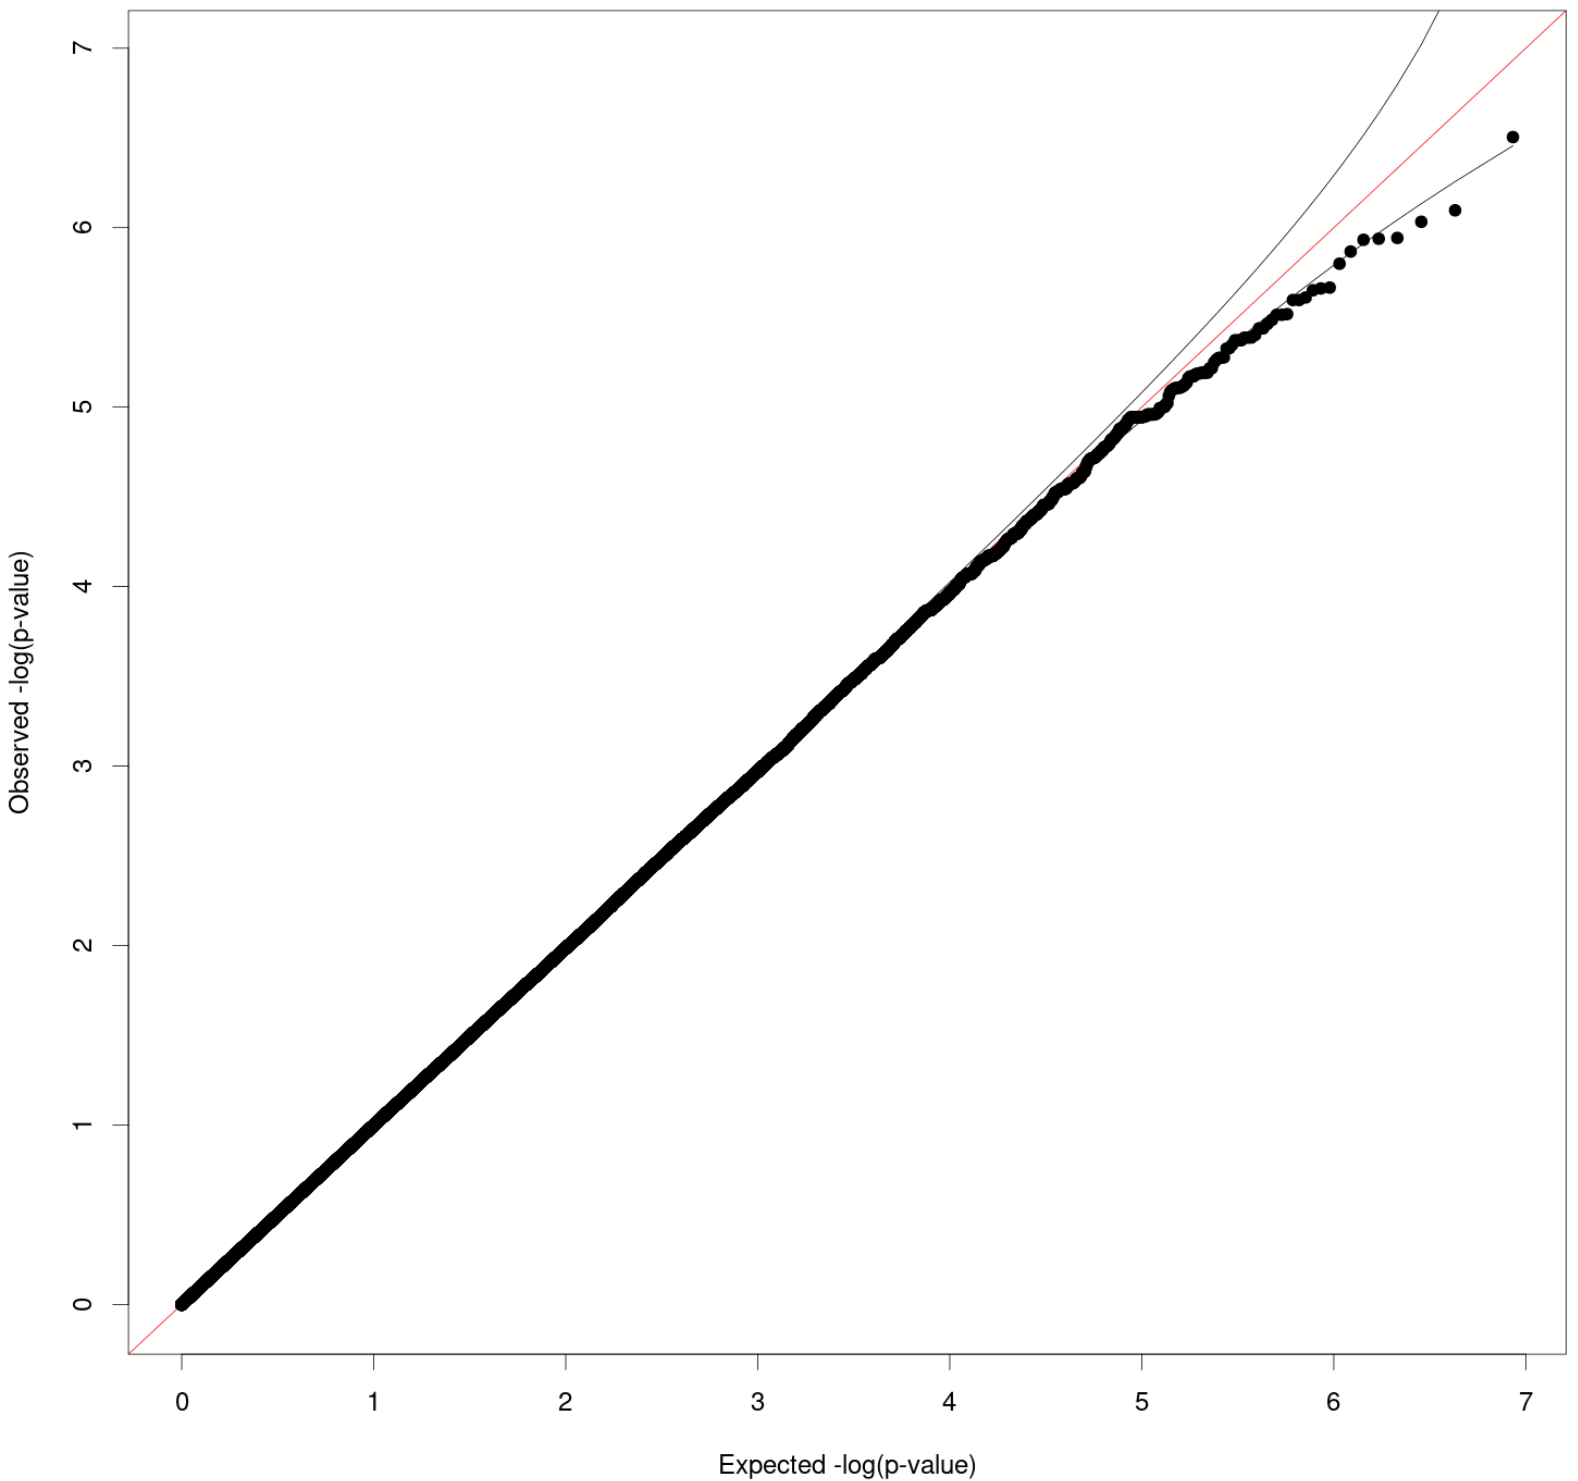

QQ plot for mz113.0597\_t29.2, sorbate  
inflation factor = 1.001

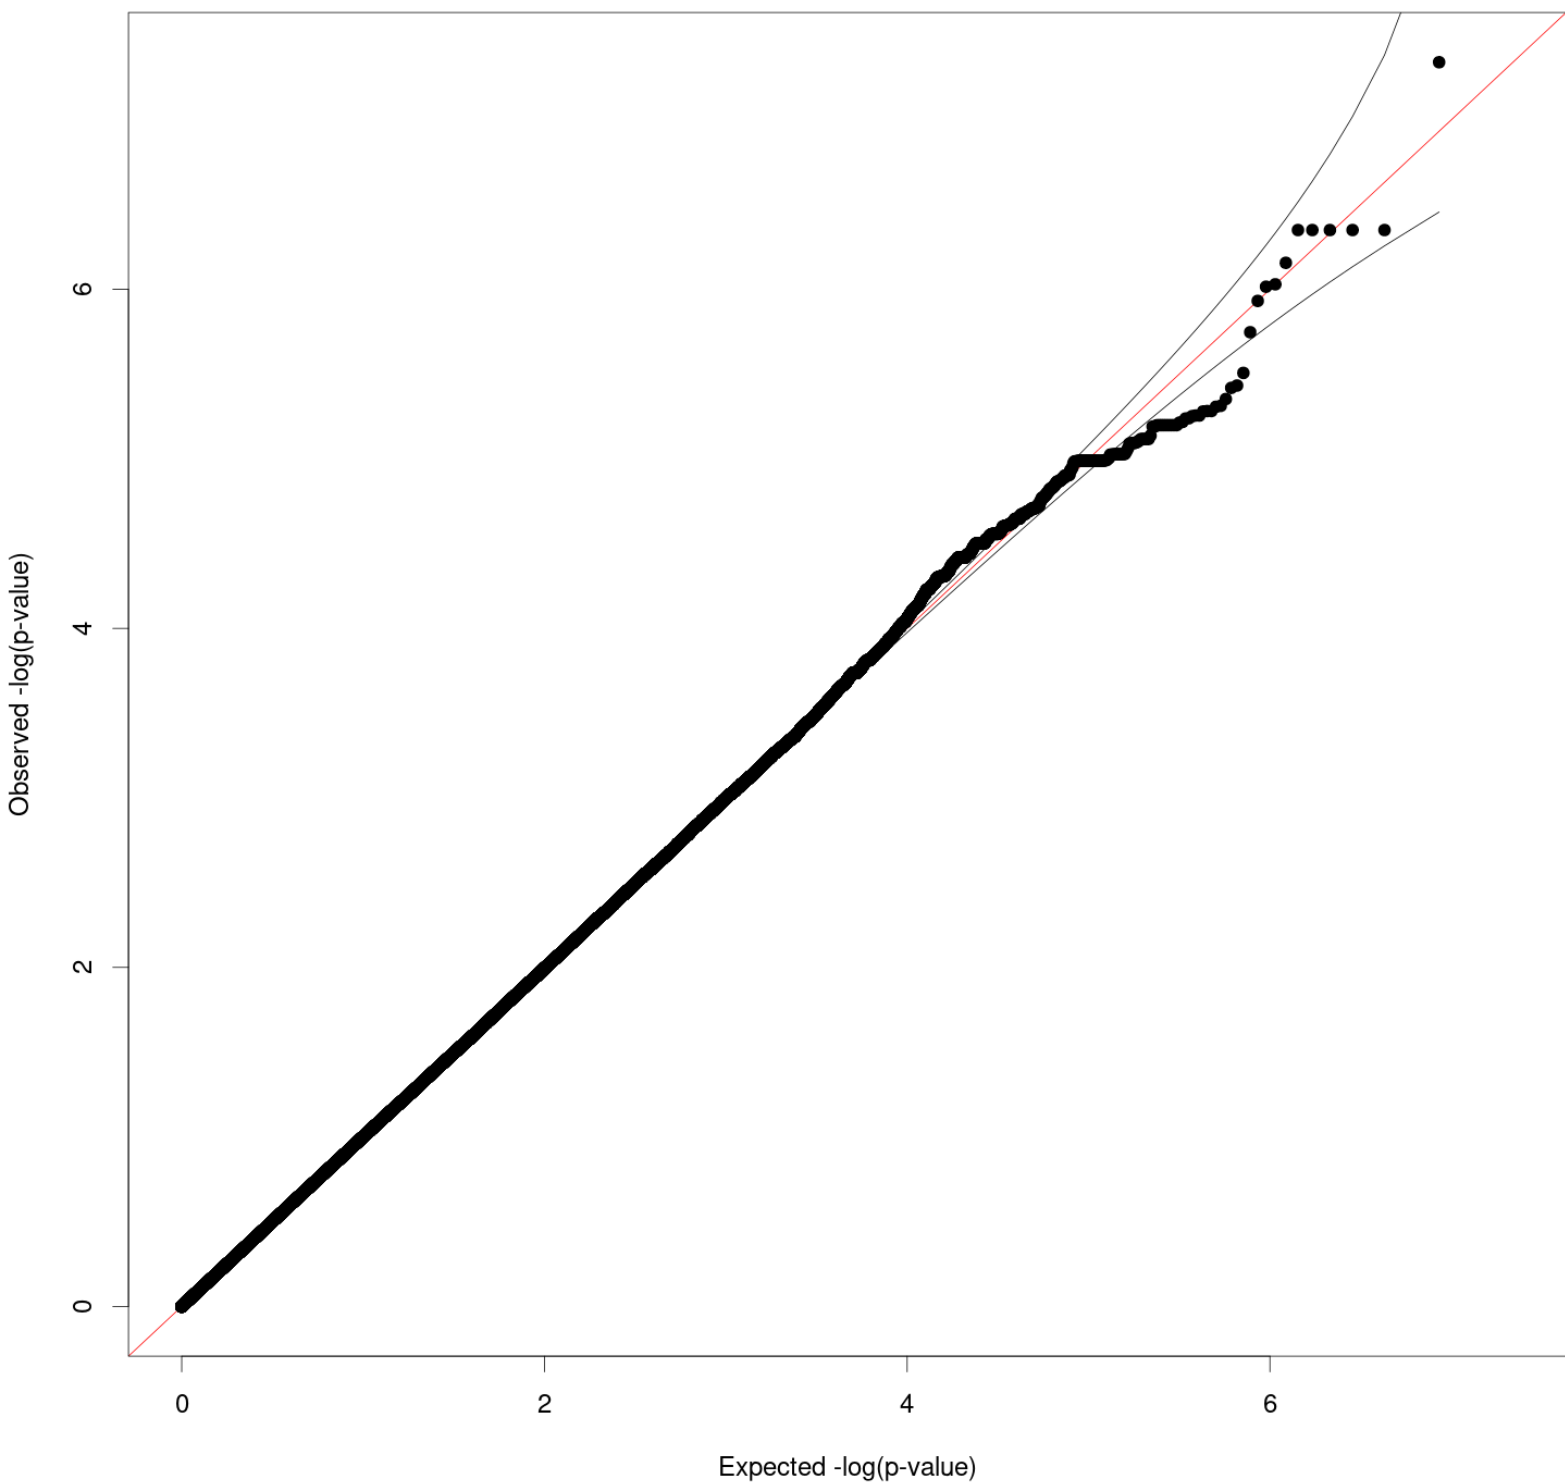

QQ plot for mz114.0661\_t40.7, creatinine  
inflation factor = 1.002

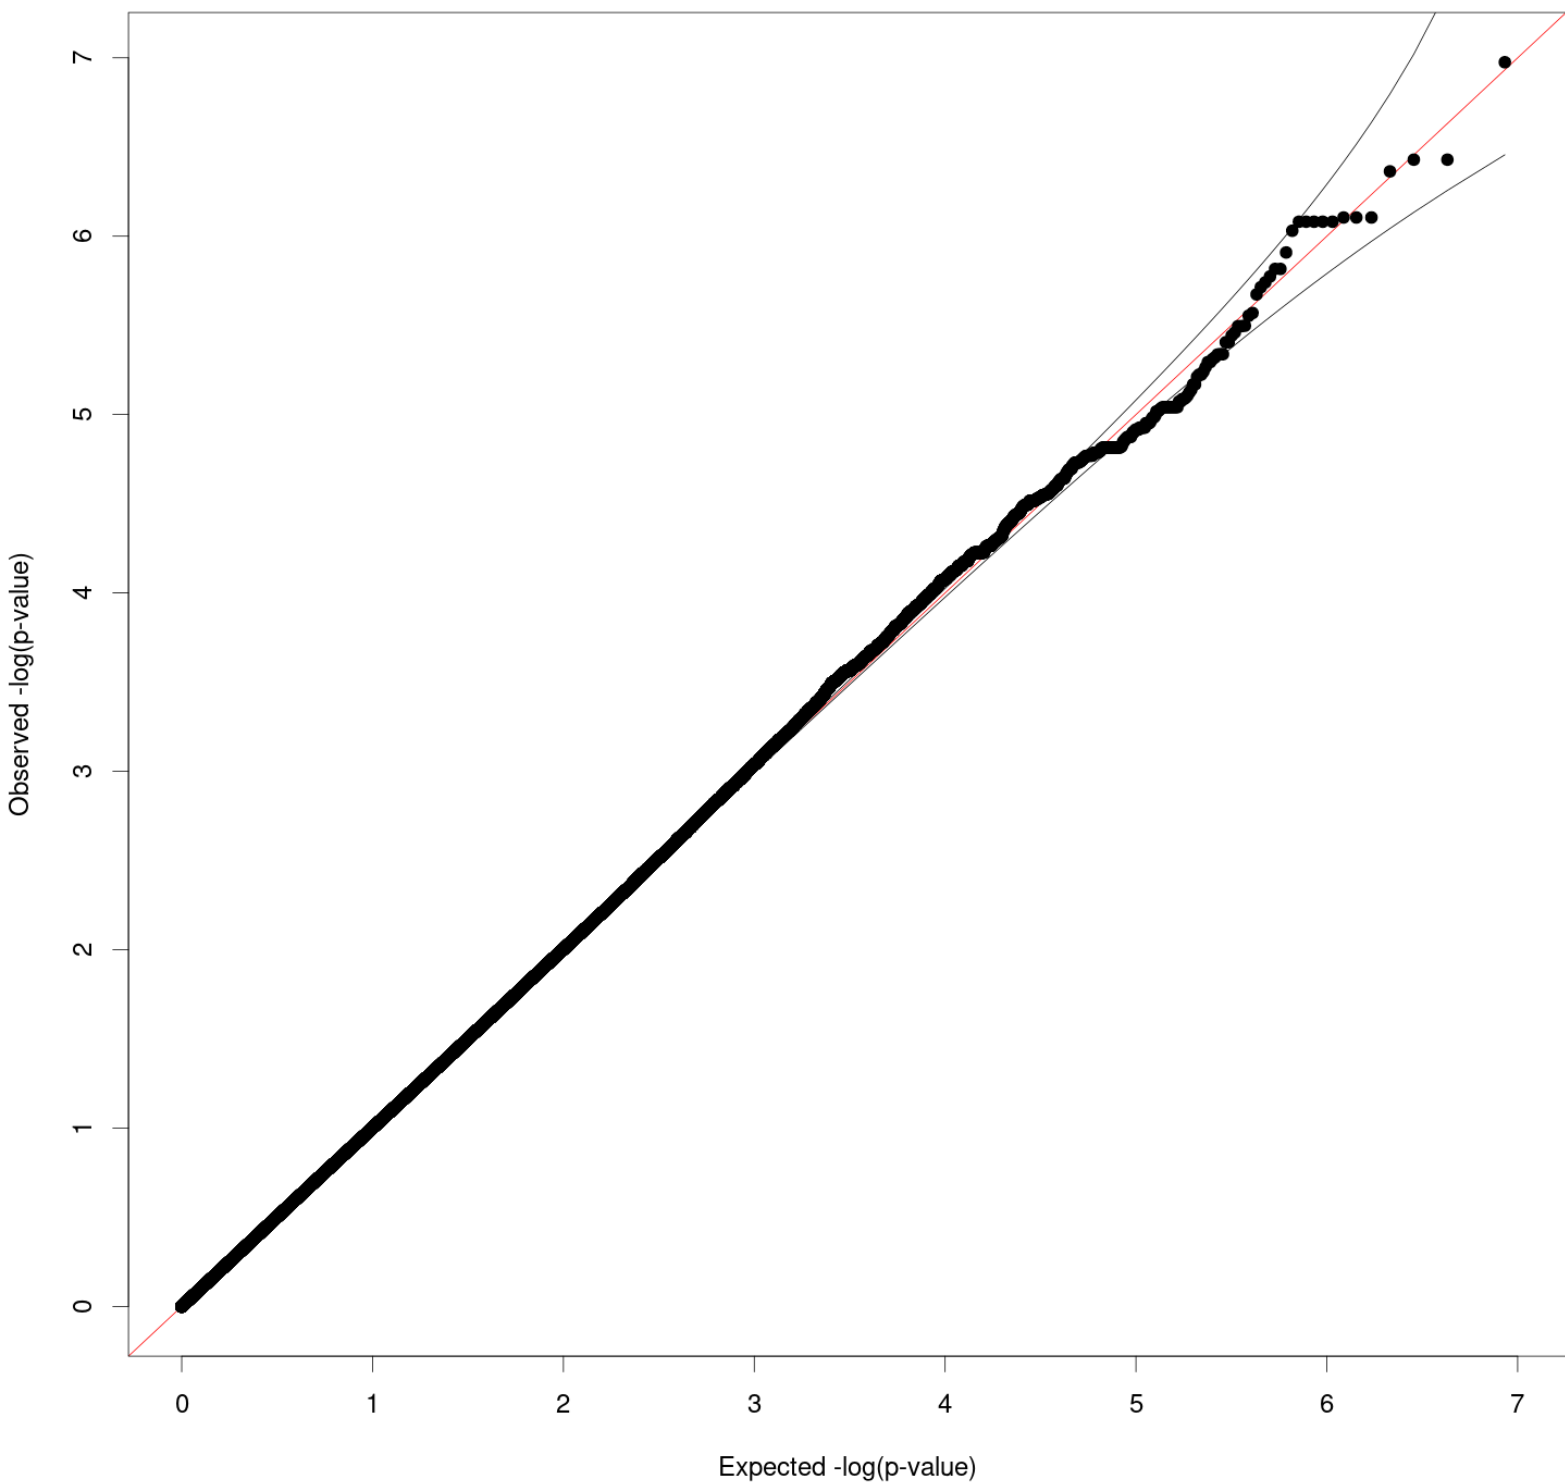

QQ plot for mz116.0343\_t85.6, maleamate  
inflation factor = 1.003

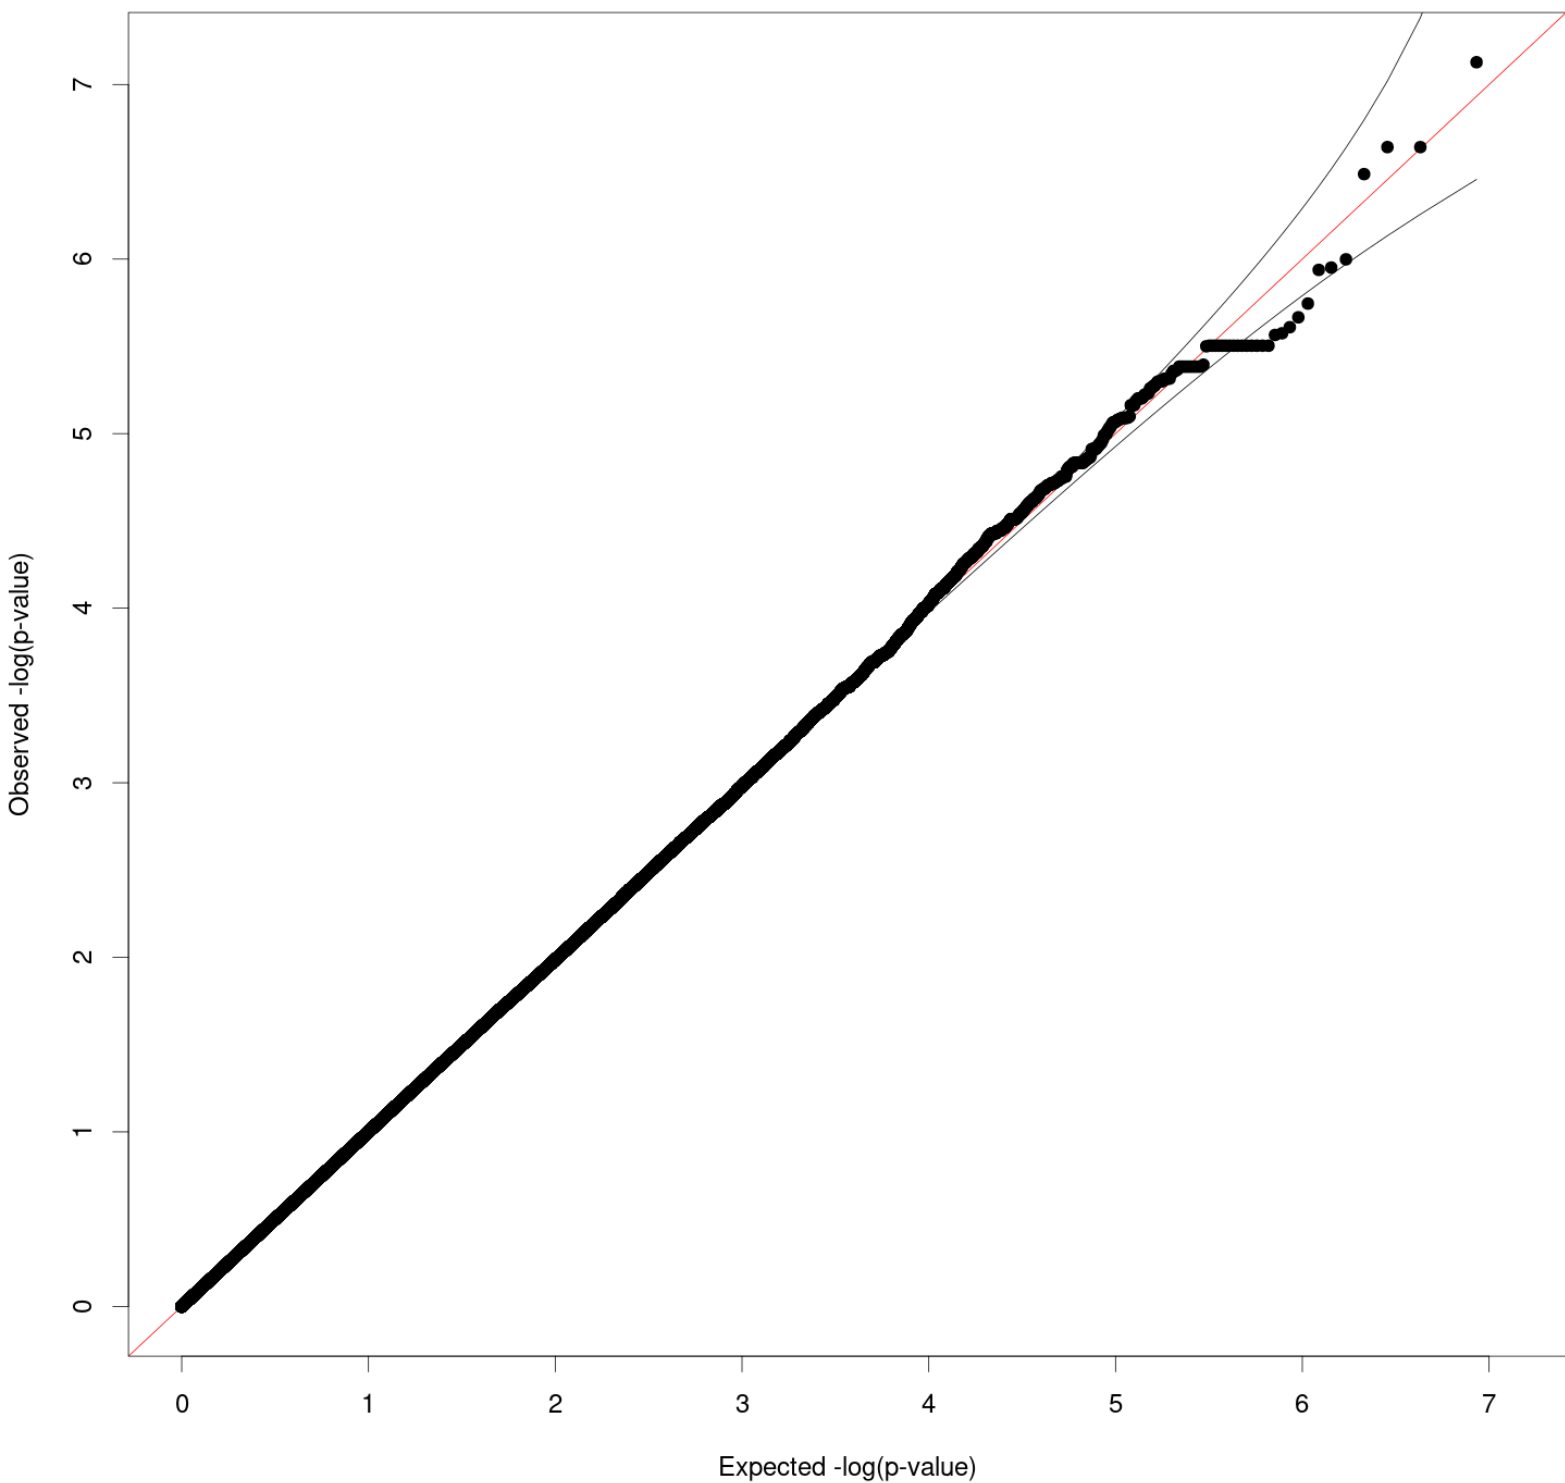

QQ plot for mz116.0707\_t58, proline  
inflation factor = 0.9889

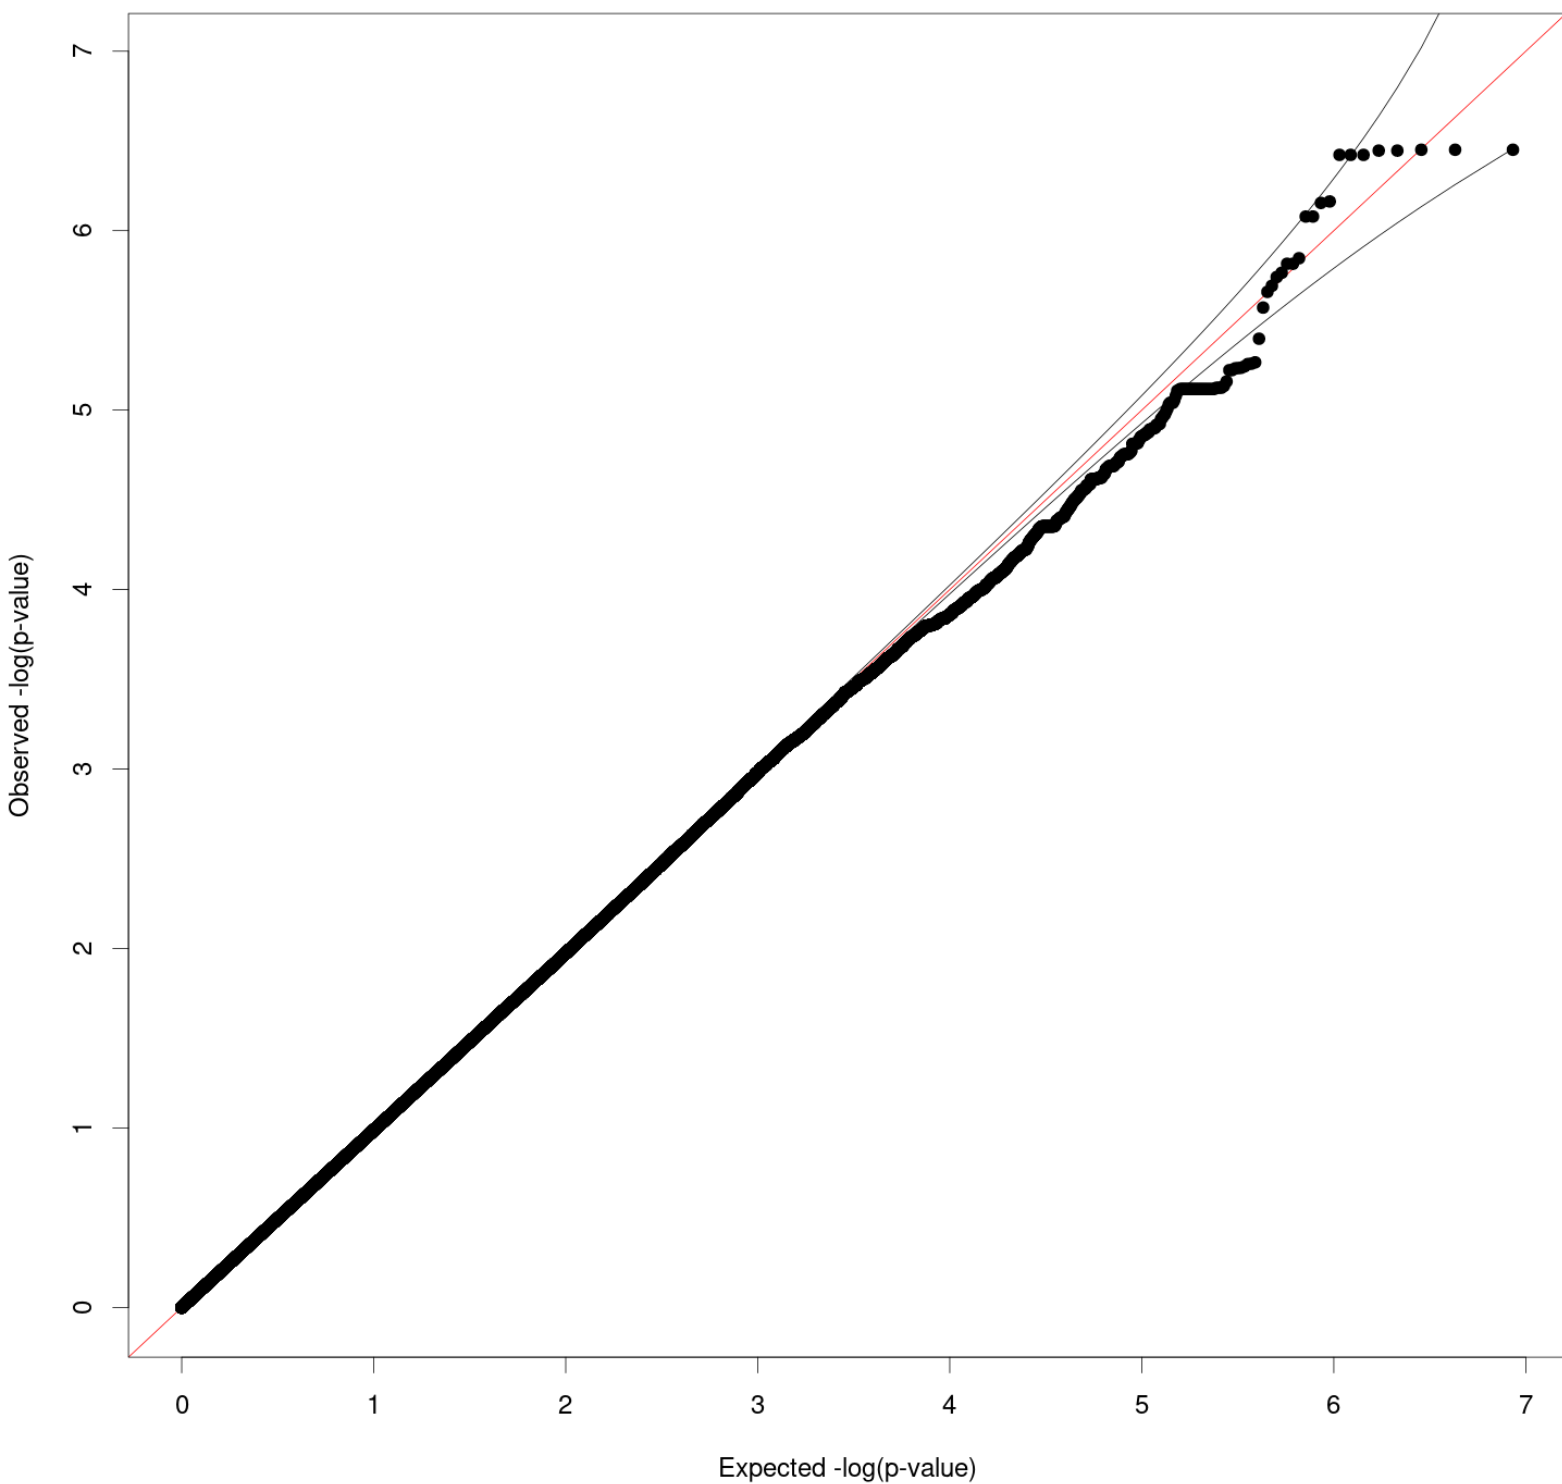

QQ plot for mz116.0716\_t21.8, 5-aminopentanoate  
inflation factor = 0.996

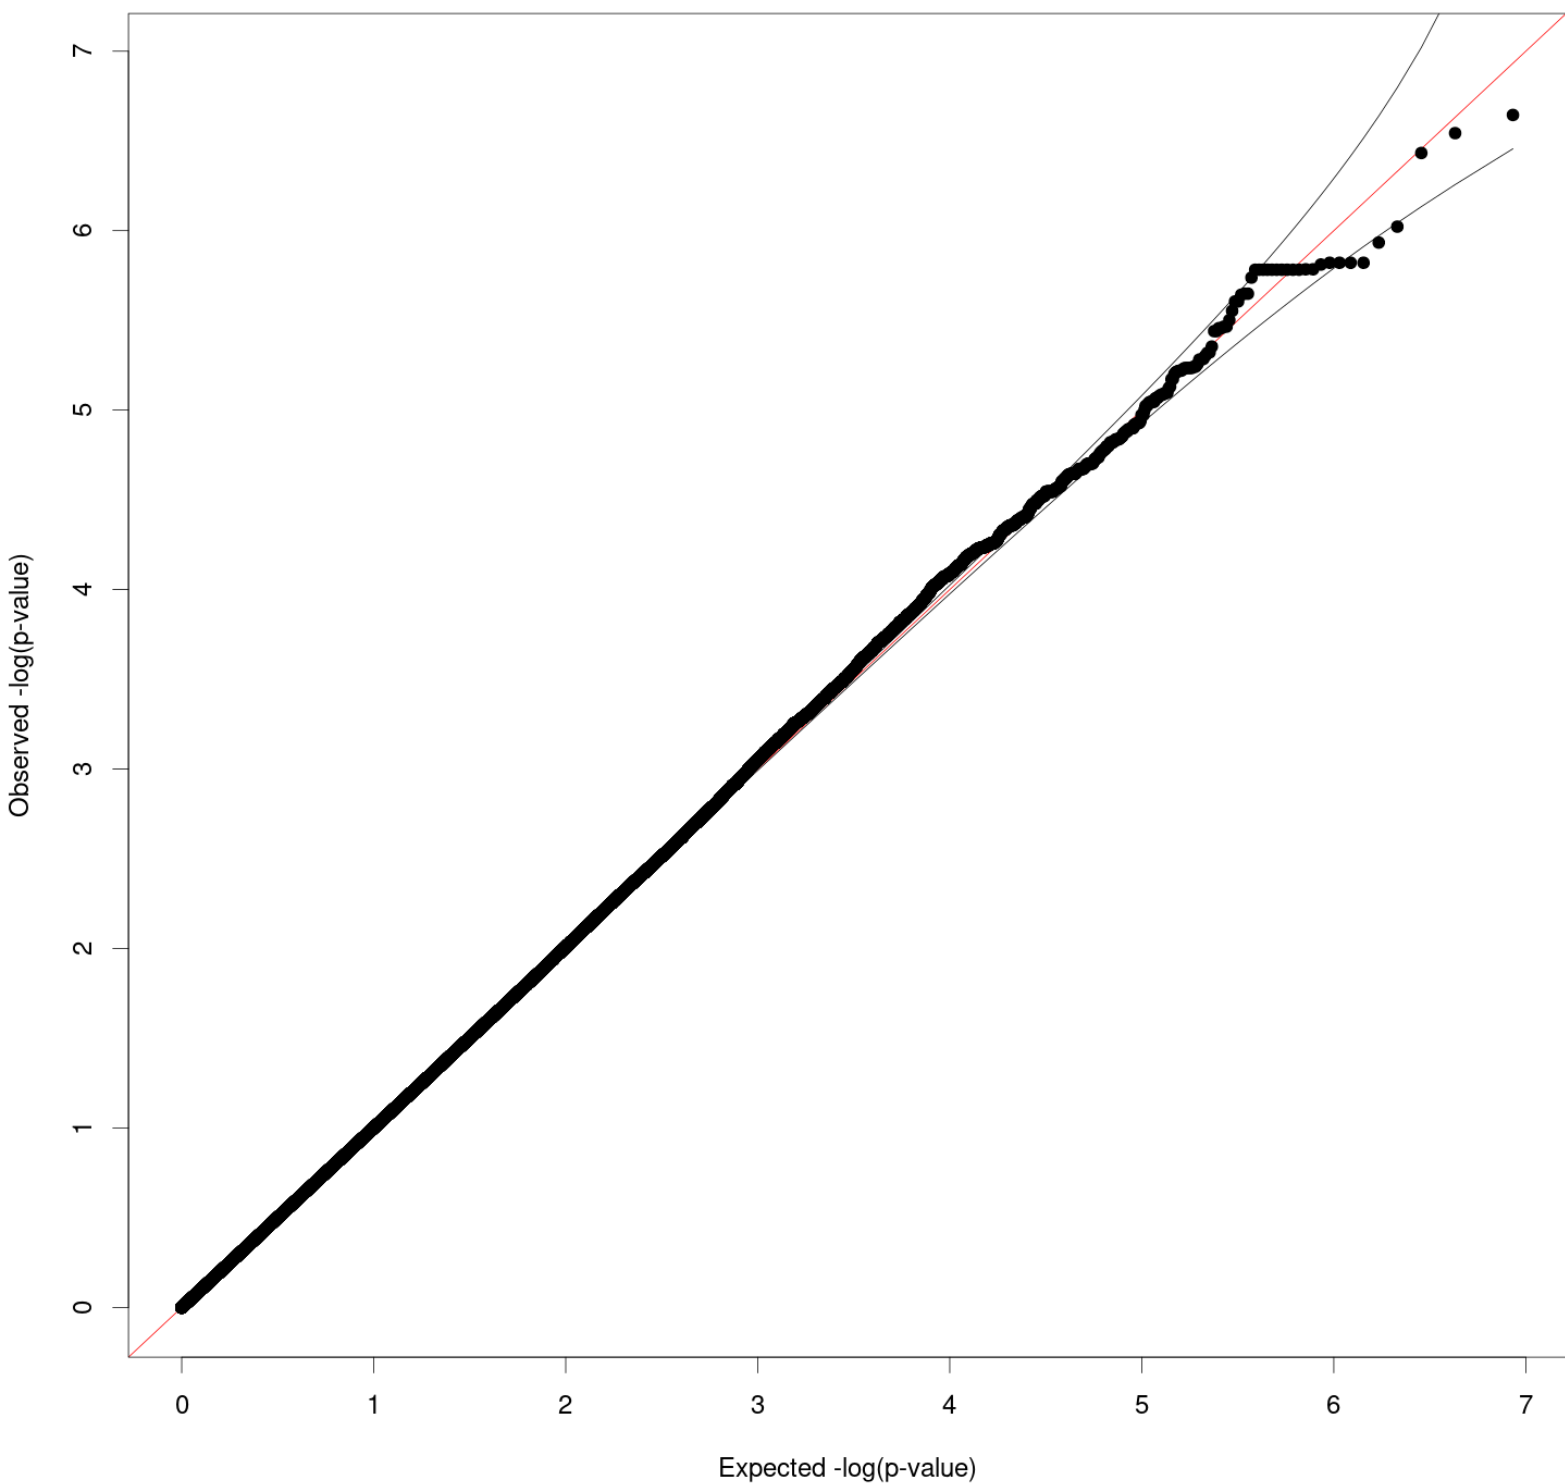



QQ plot for mz118.0612\_t73.1, guanidinoacetate  
inflation factor = 1.002

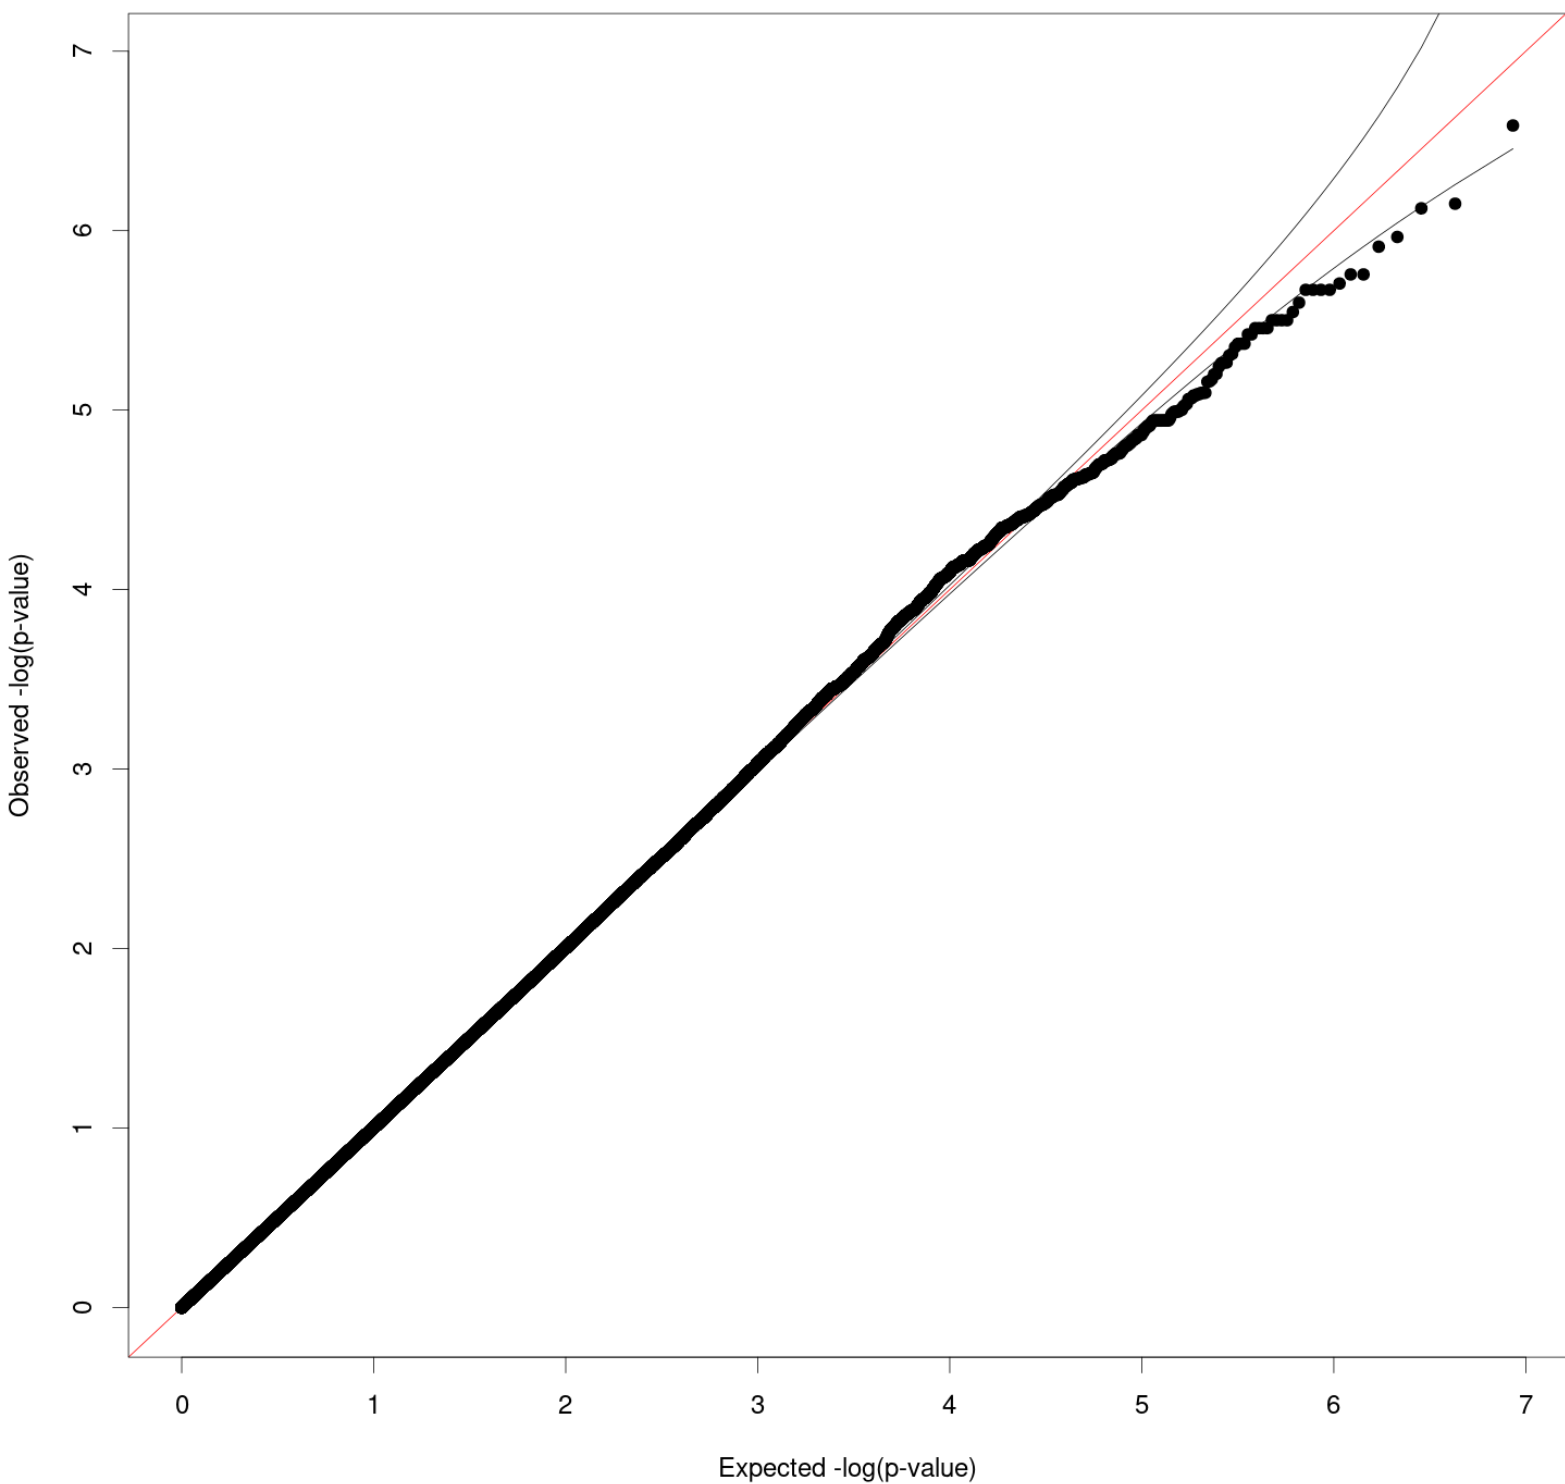

QQ plot for mz123.045\_t27.4, 3-hydroxybenzyl alcohol  
inflation factor = 1.011

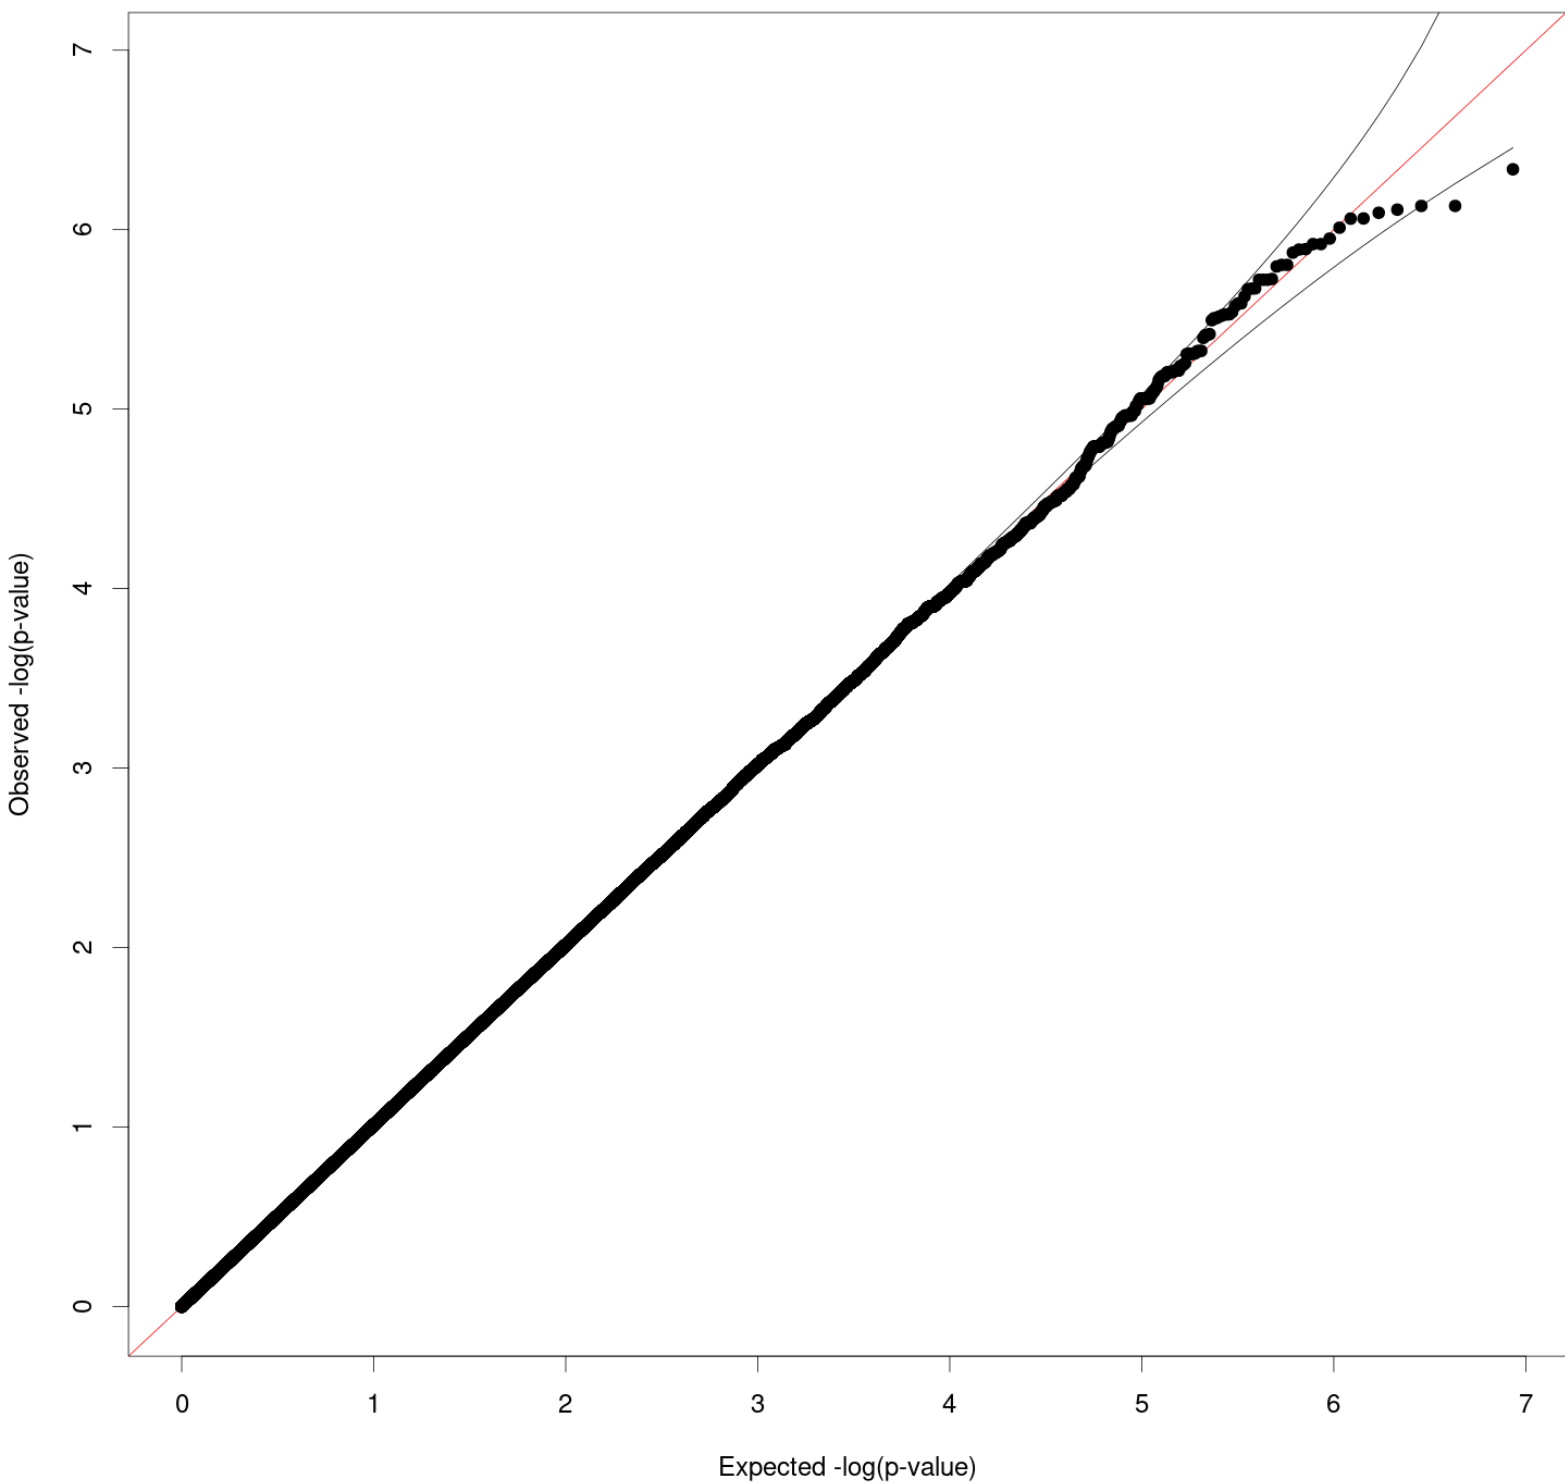

QQ plot for mz123.0441\_t56.2, 3-hydroxybenzaldehyde  
inflation factor = 0.9945

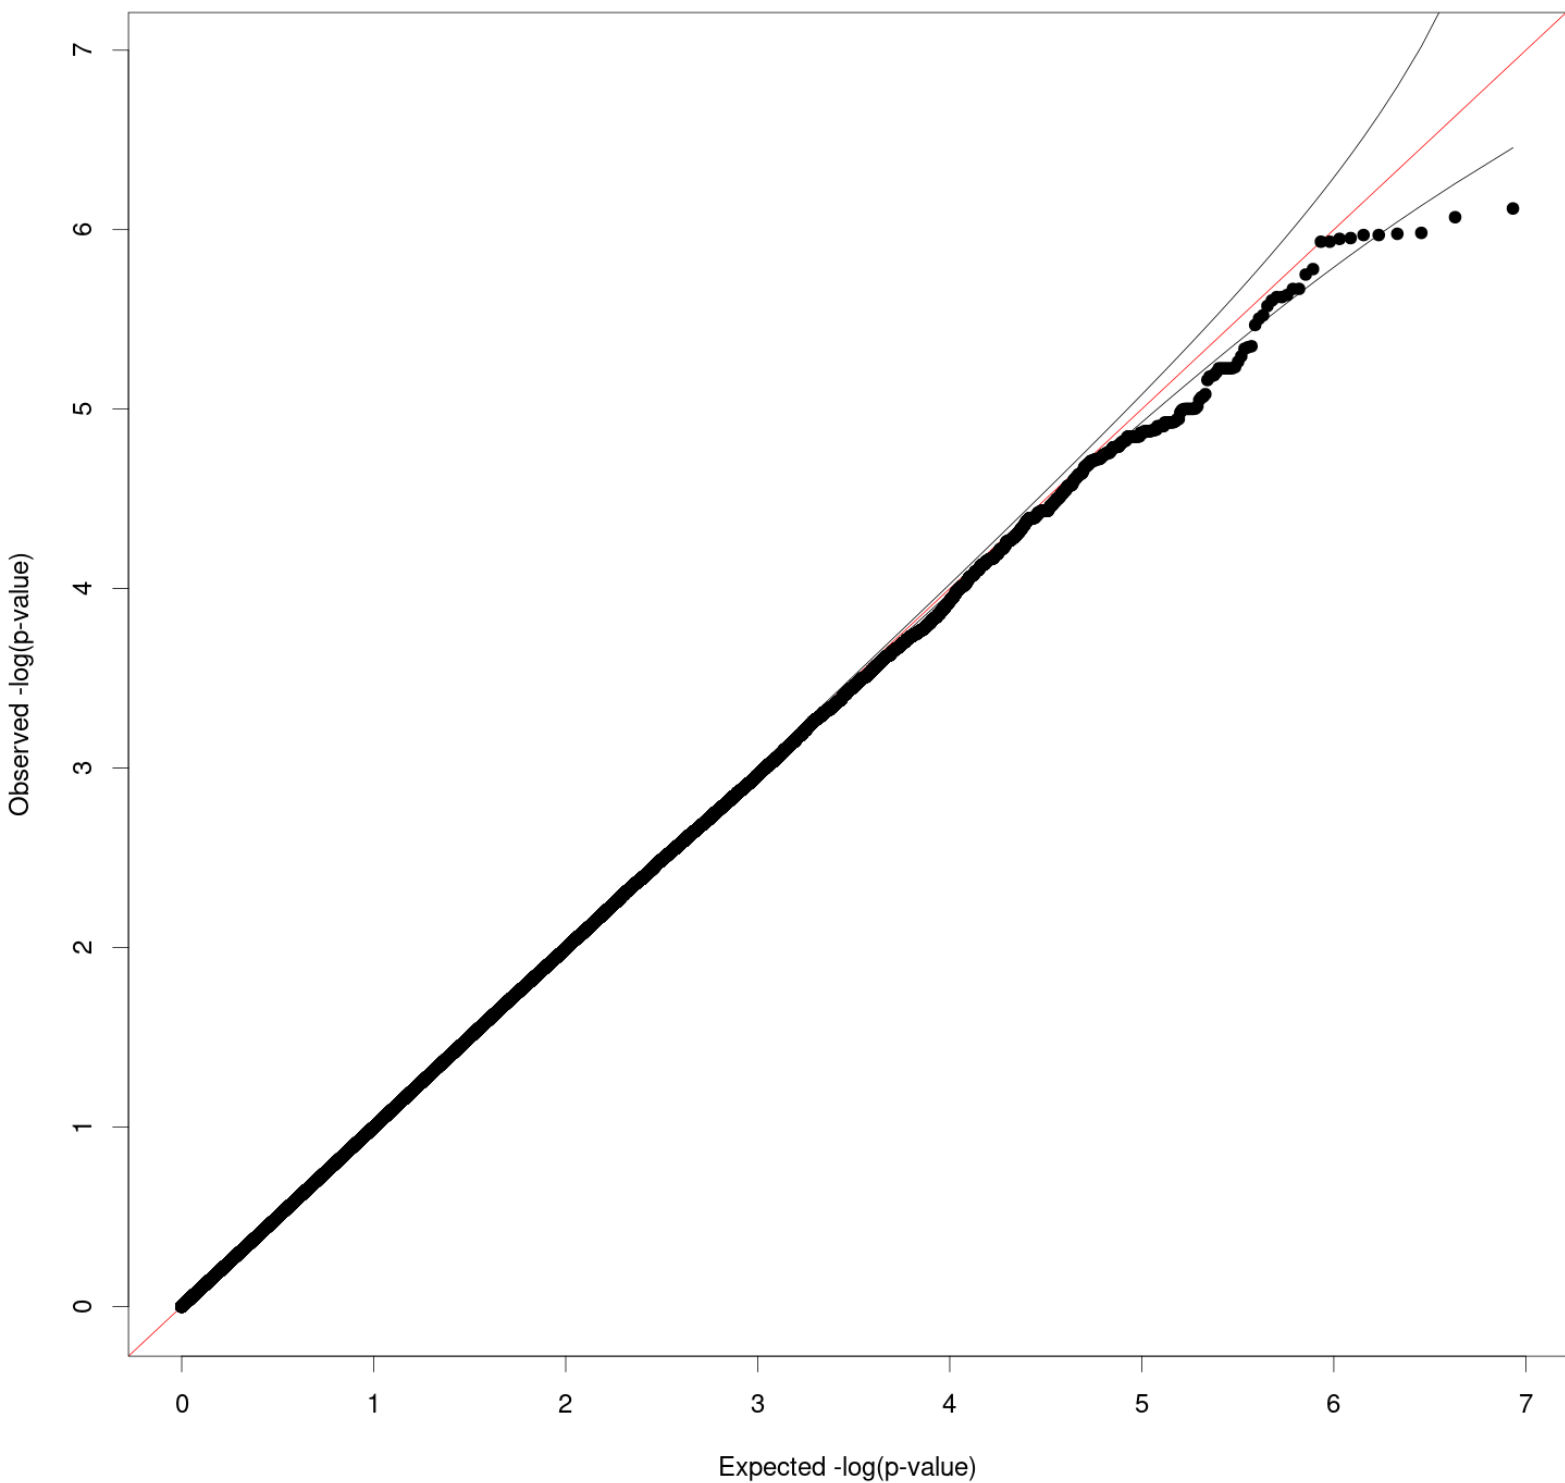

QQ plot for mz123.0552\_t32.2, nicotineamide  
inflation factor = 0.9975

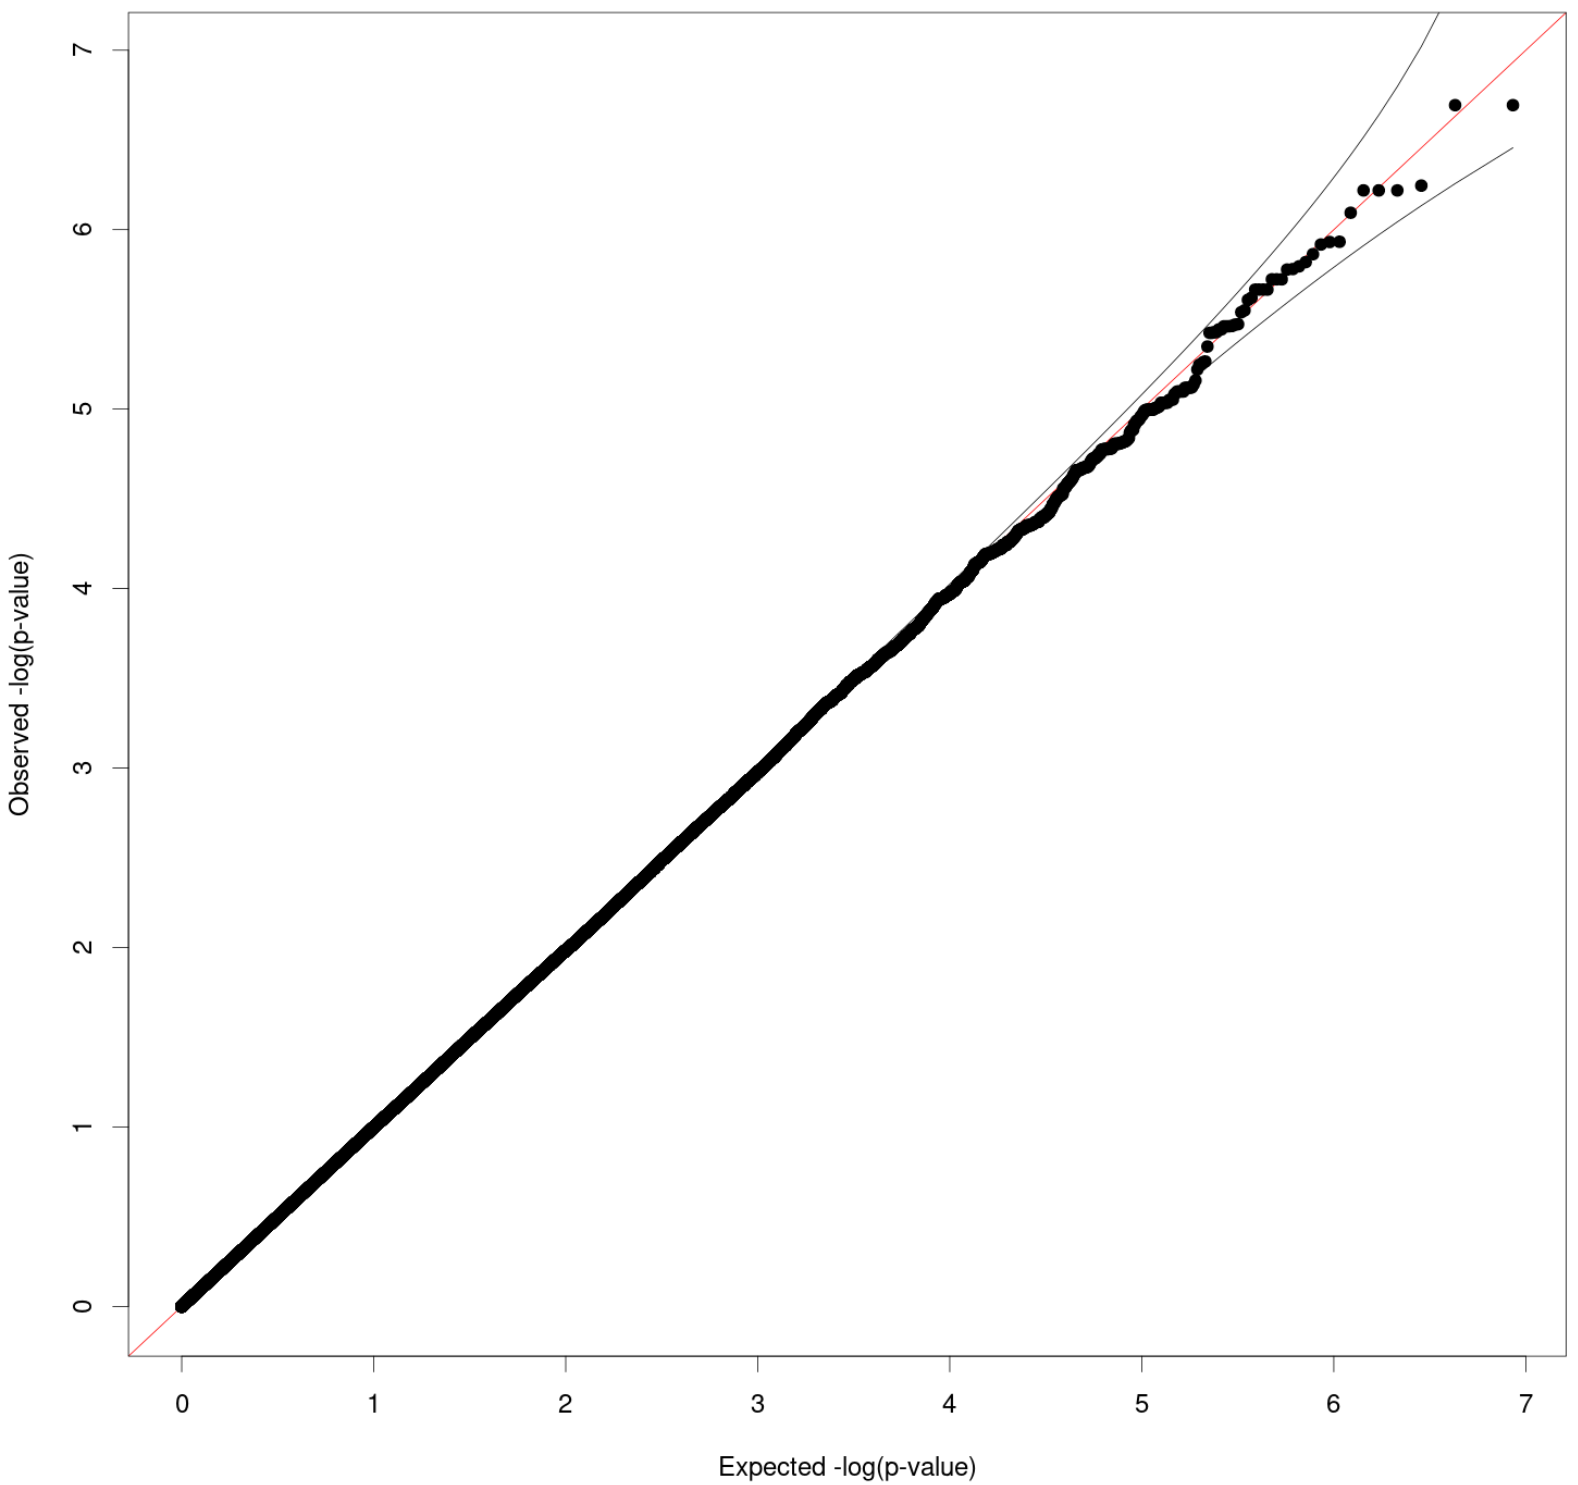

QQ plot for mz126.022\_t55.6, taurine  
inflation factor = 0.9915

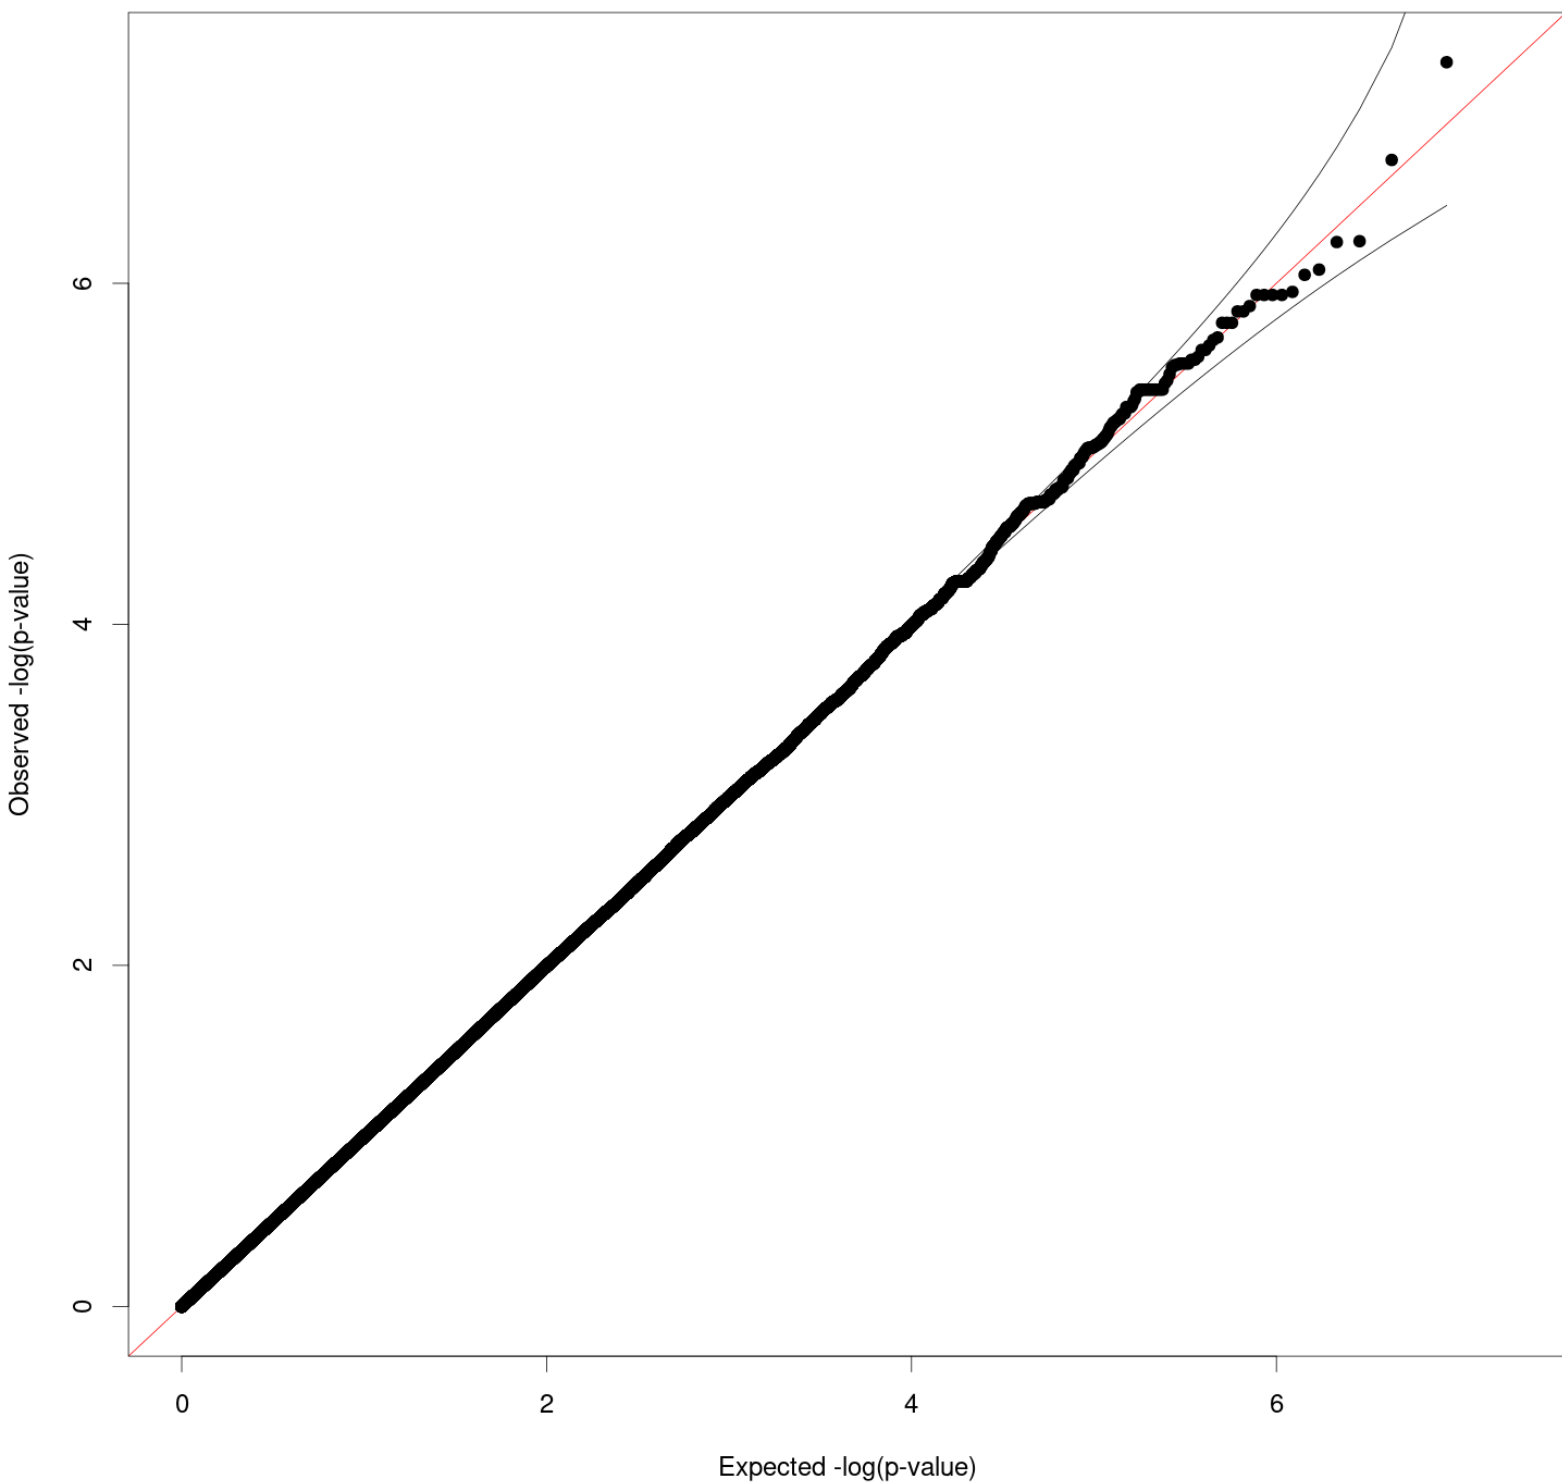

QQ plot for mz127.0503\_t70.4, 4-imidazoleacetic acid  
inflation factor = 0.9794

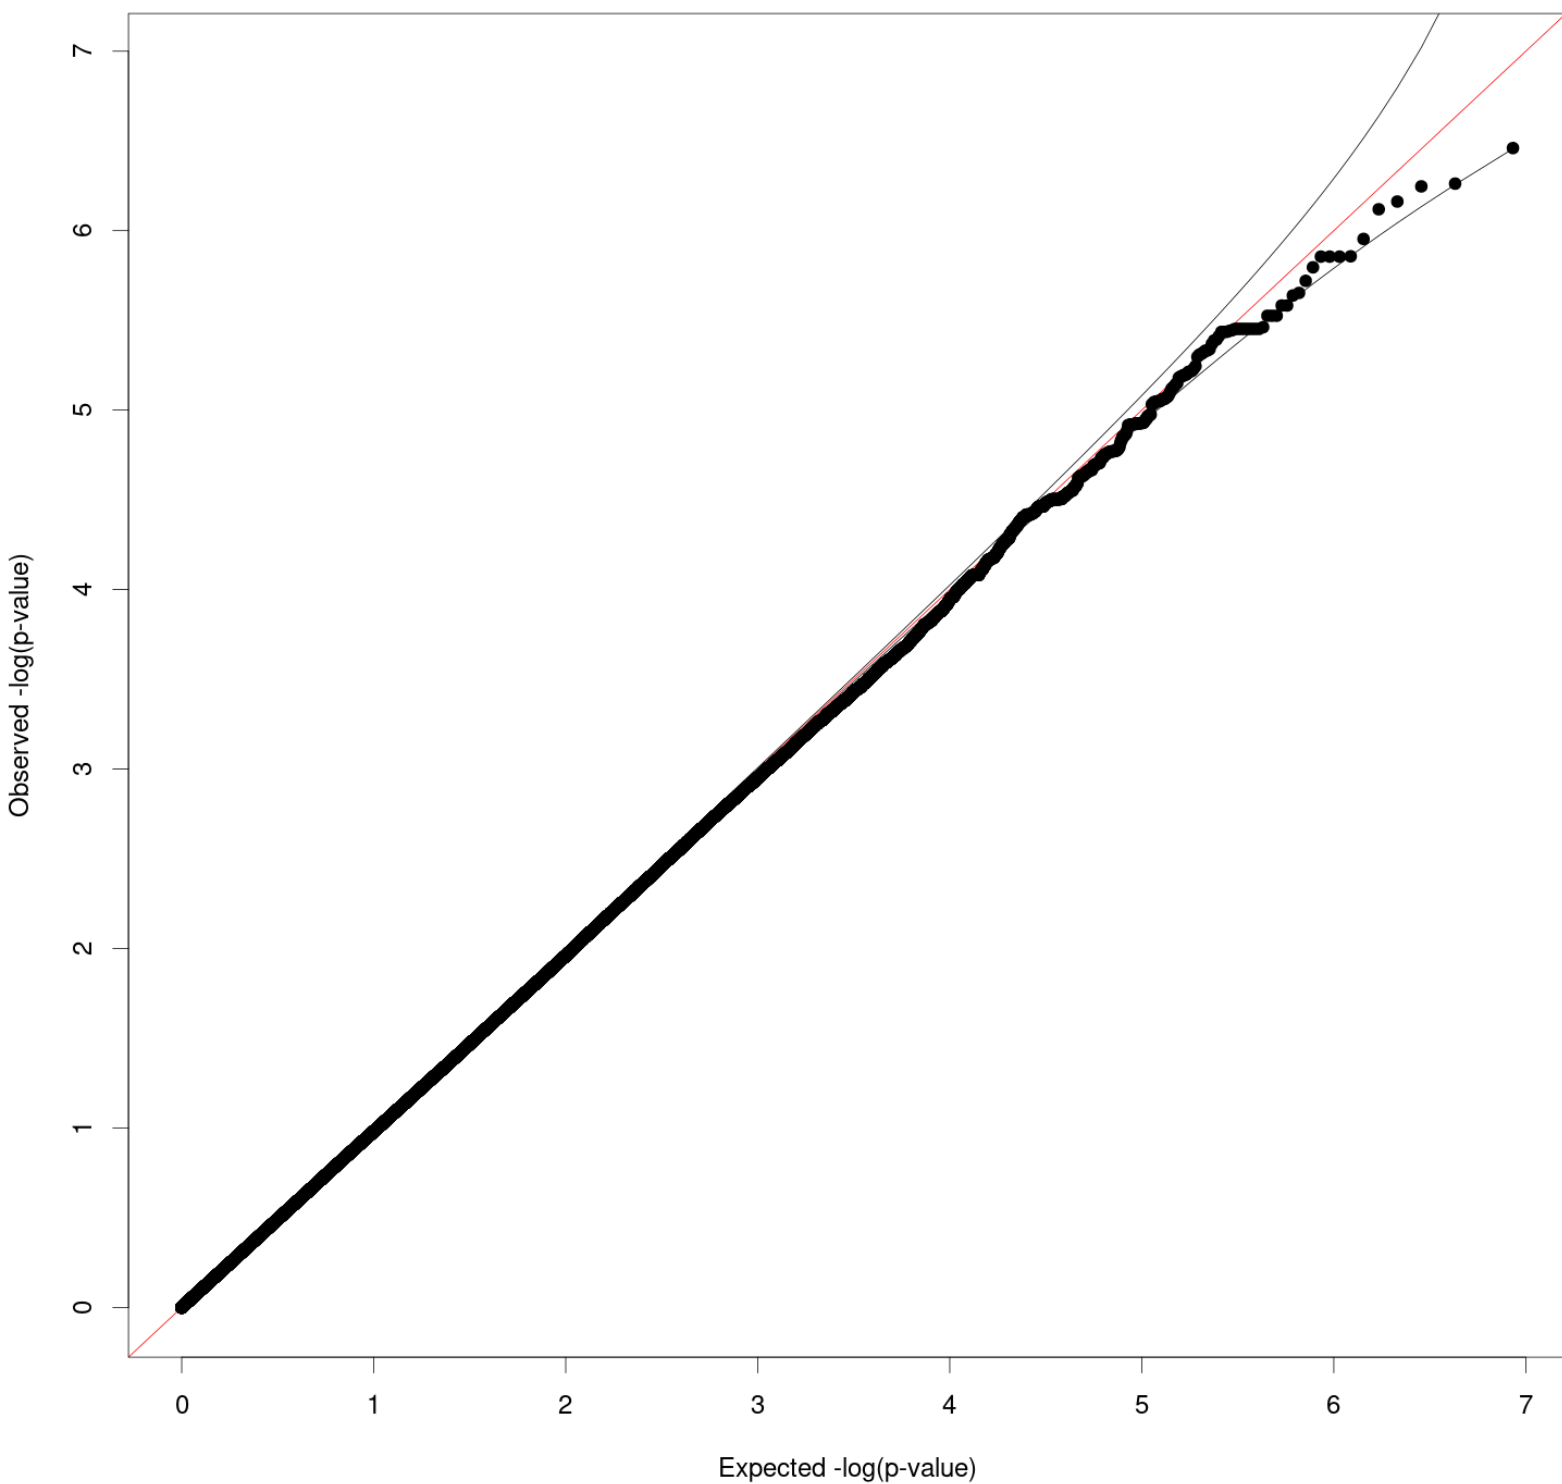

QQ plot for mz130.0863\_t52.9, pipecolate  
inflation factor = 0.9944

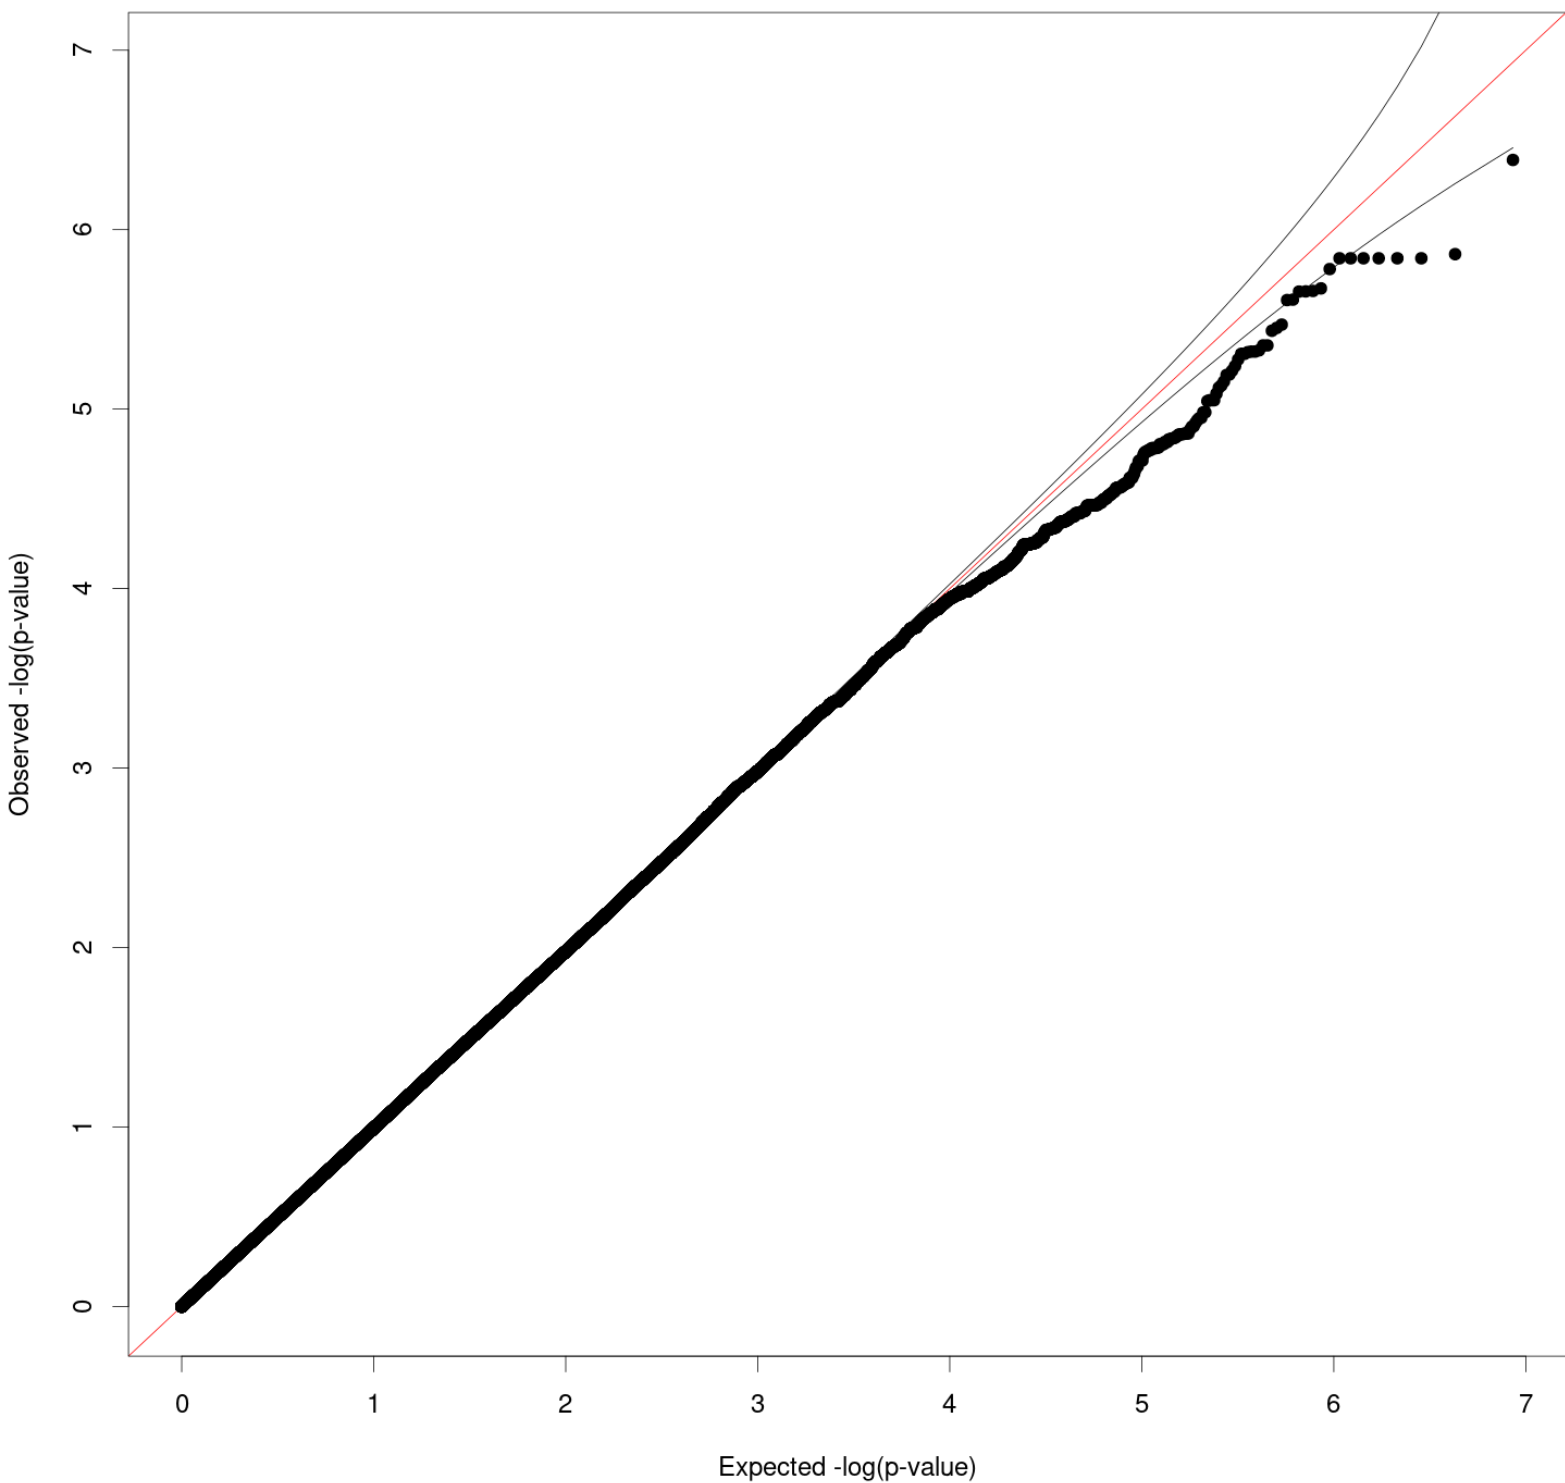

QQ plot for mz130.0873\_t23, norleucine  
inflation factor = 0.99

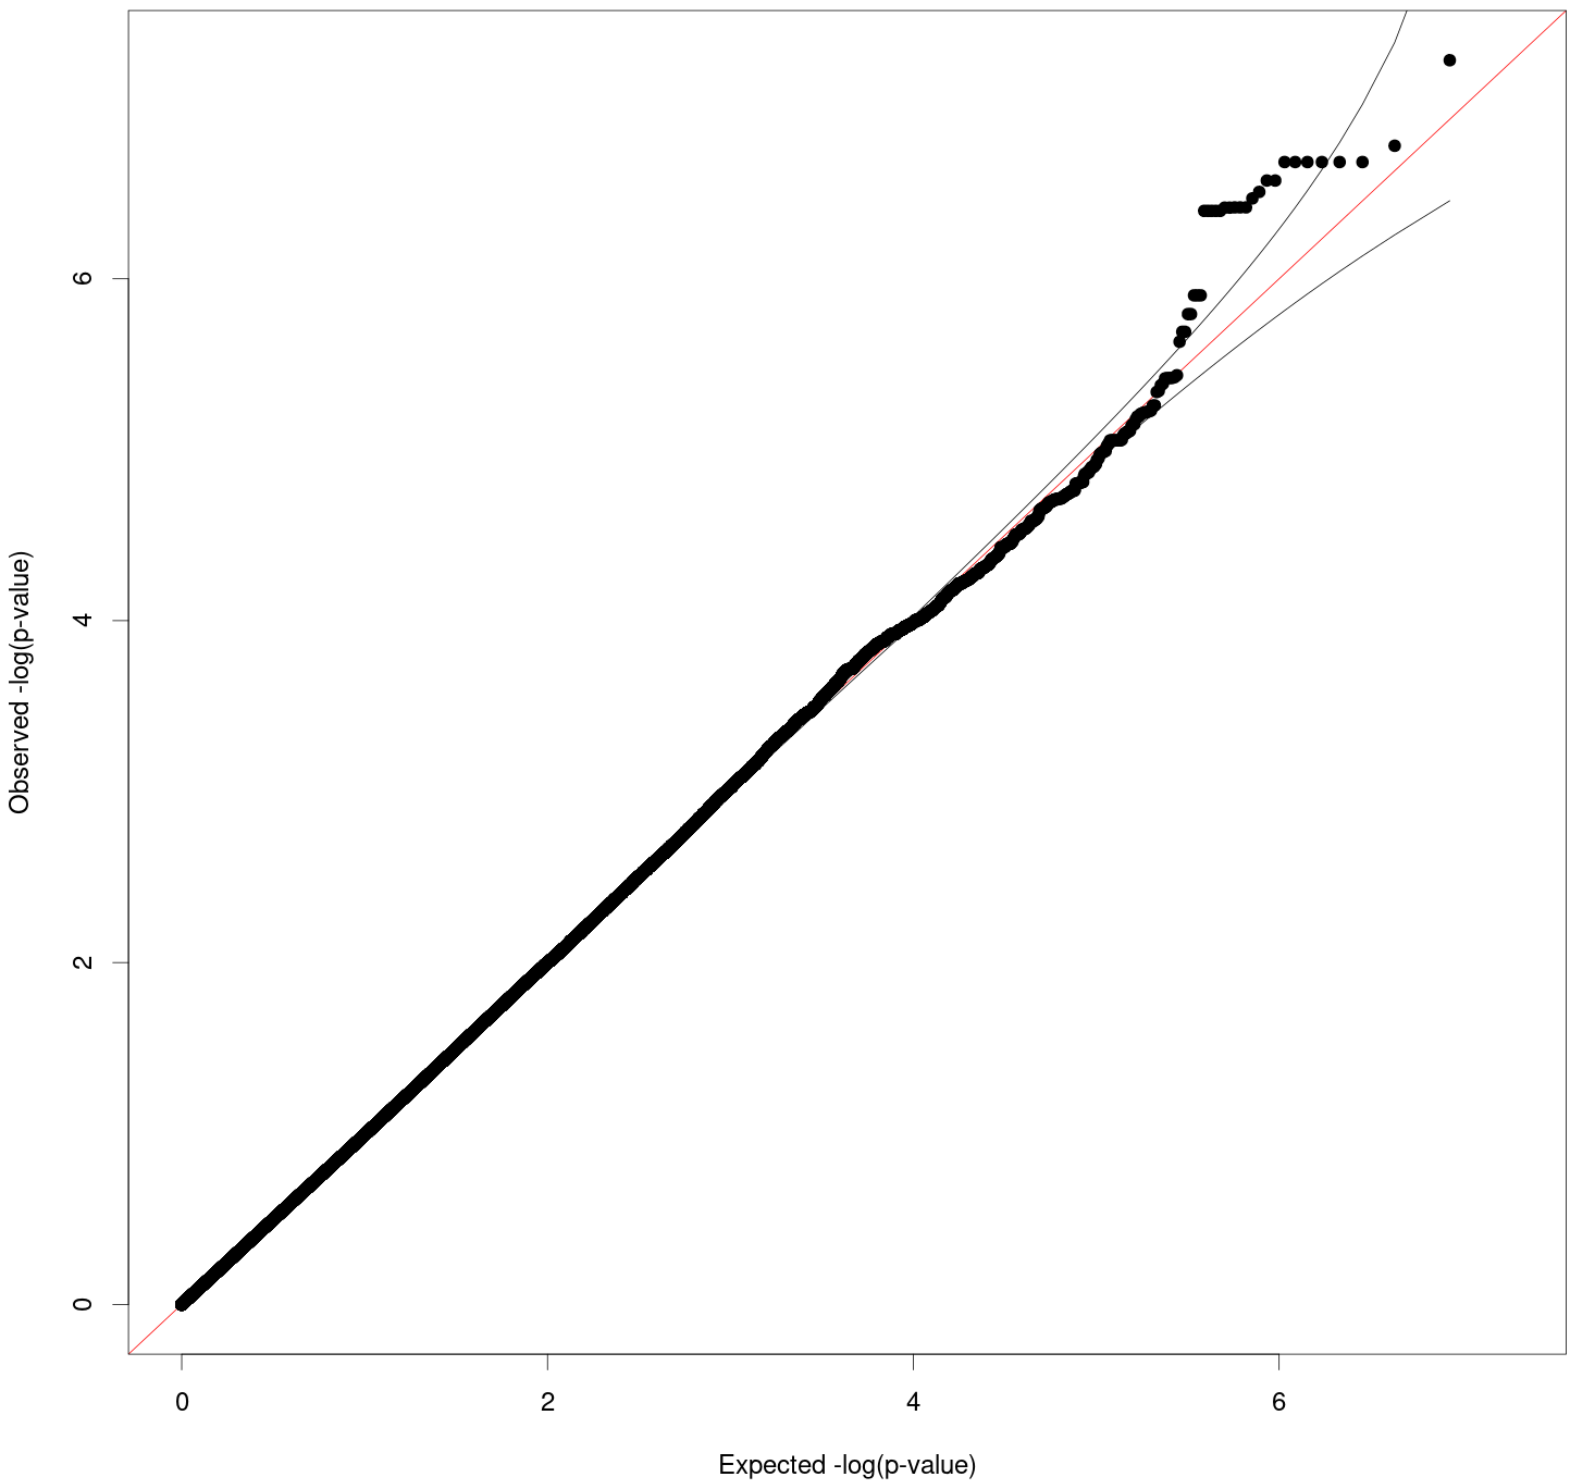



QQ plot for mz131.0459\_t20.7, 3-ureidopropionate  
inflation factor = 1.002

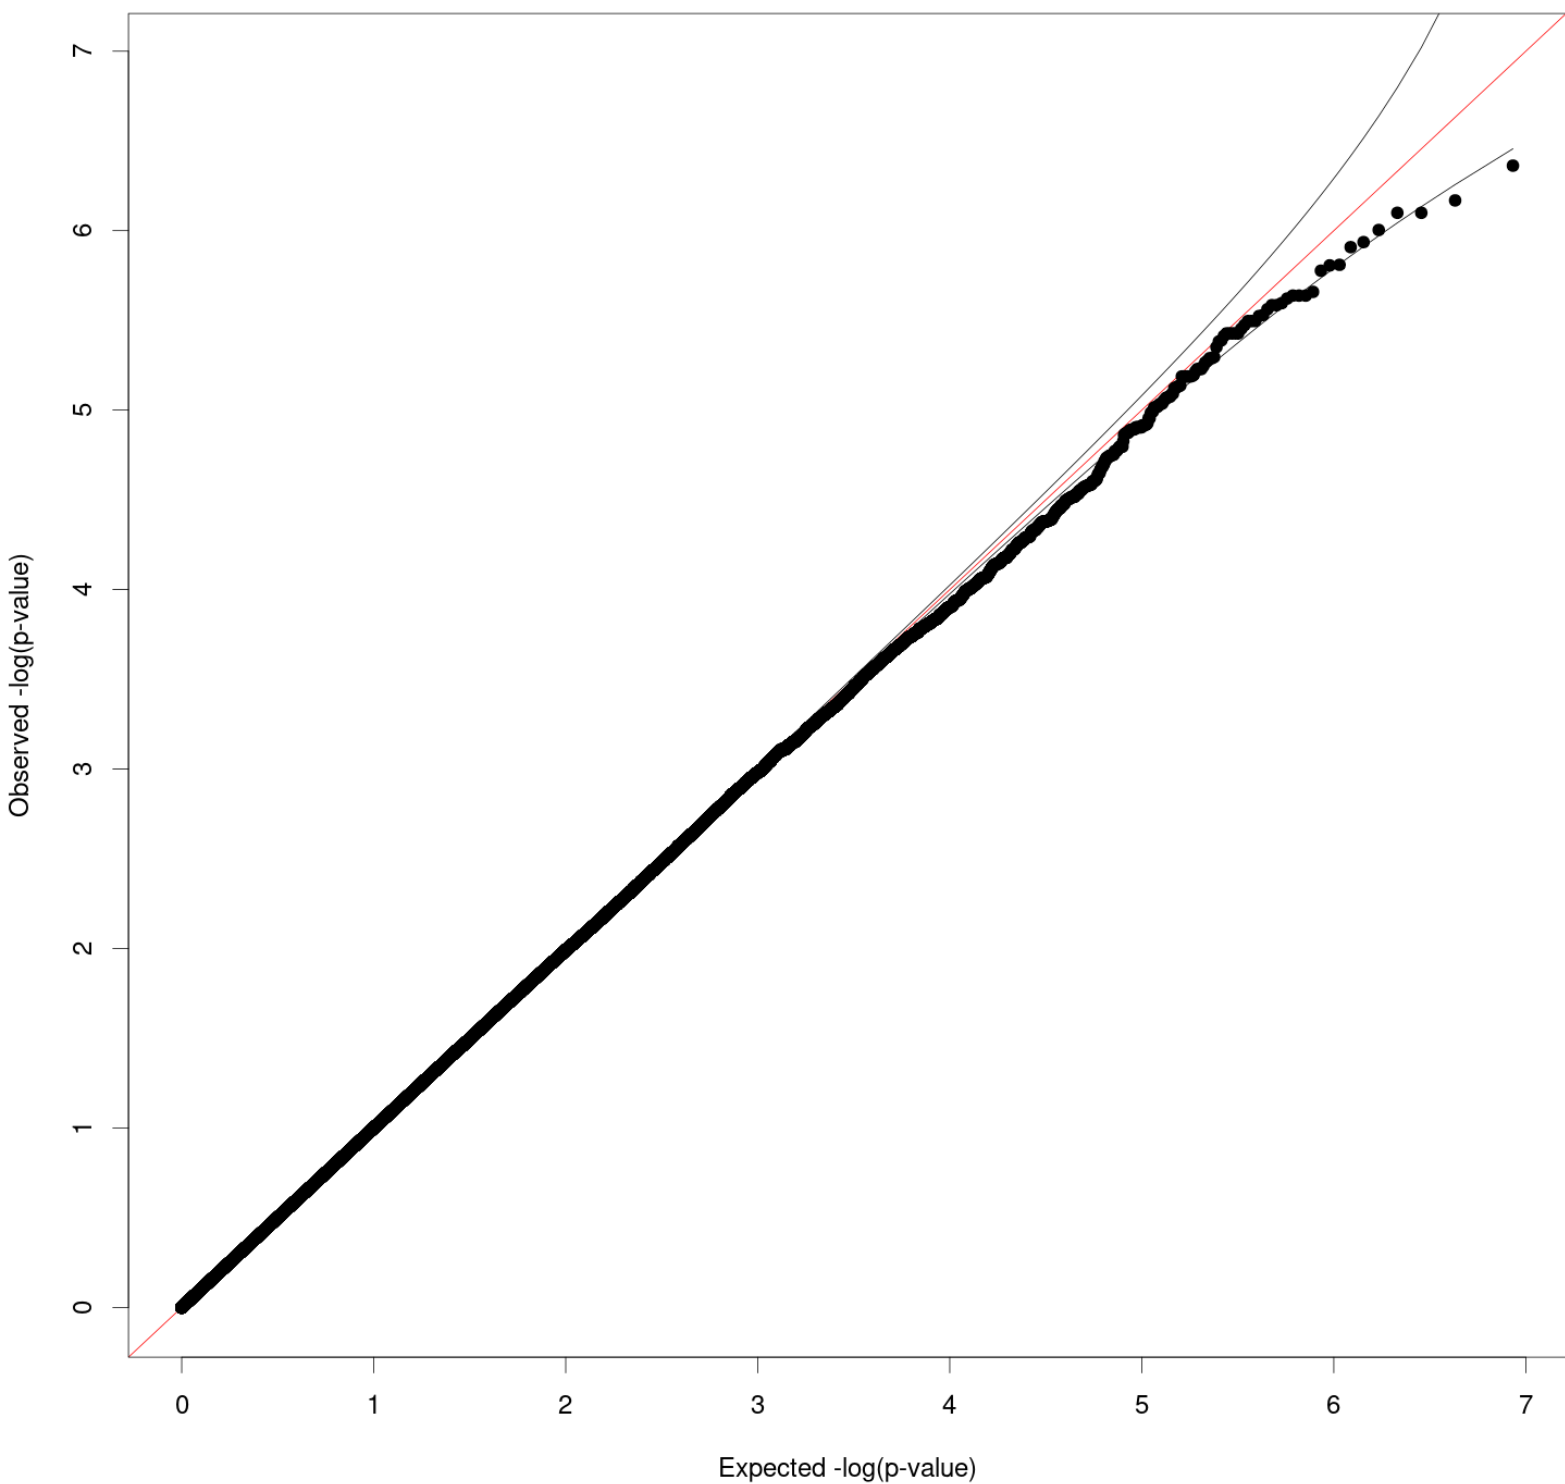

QQ plot for mz132.0765\_t72.5, creatine  
inflation factor = 1.001

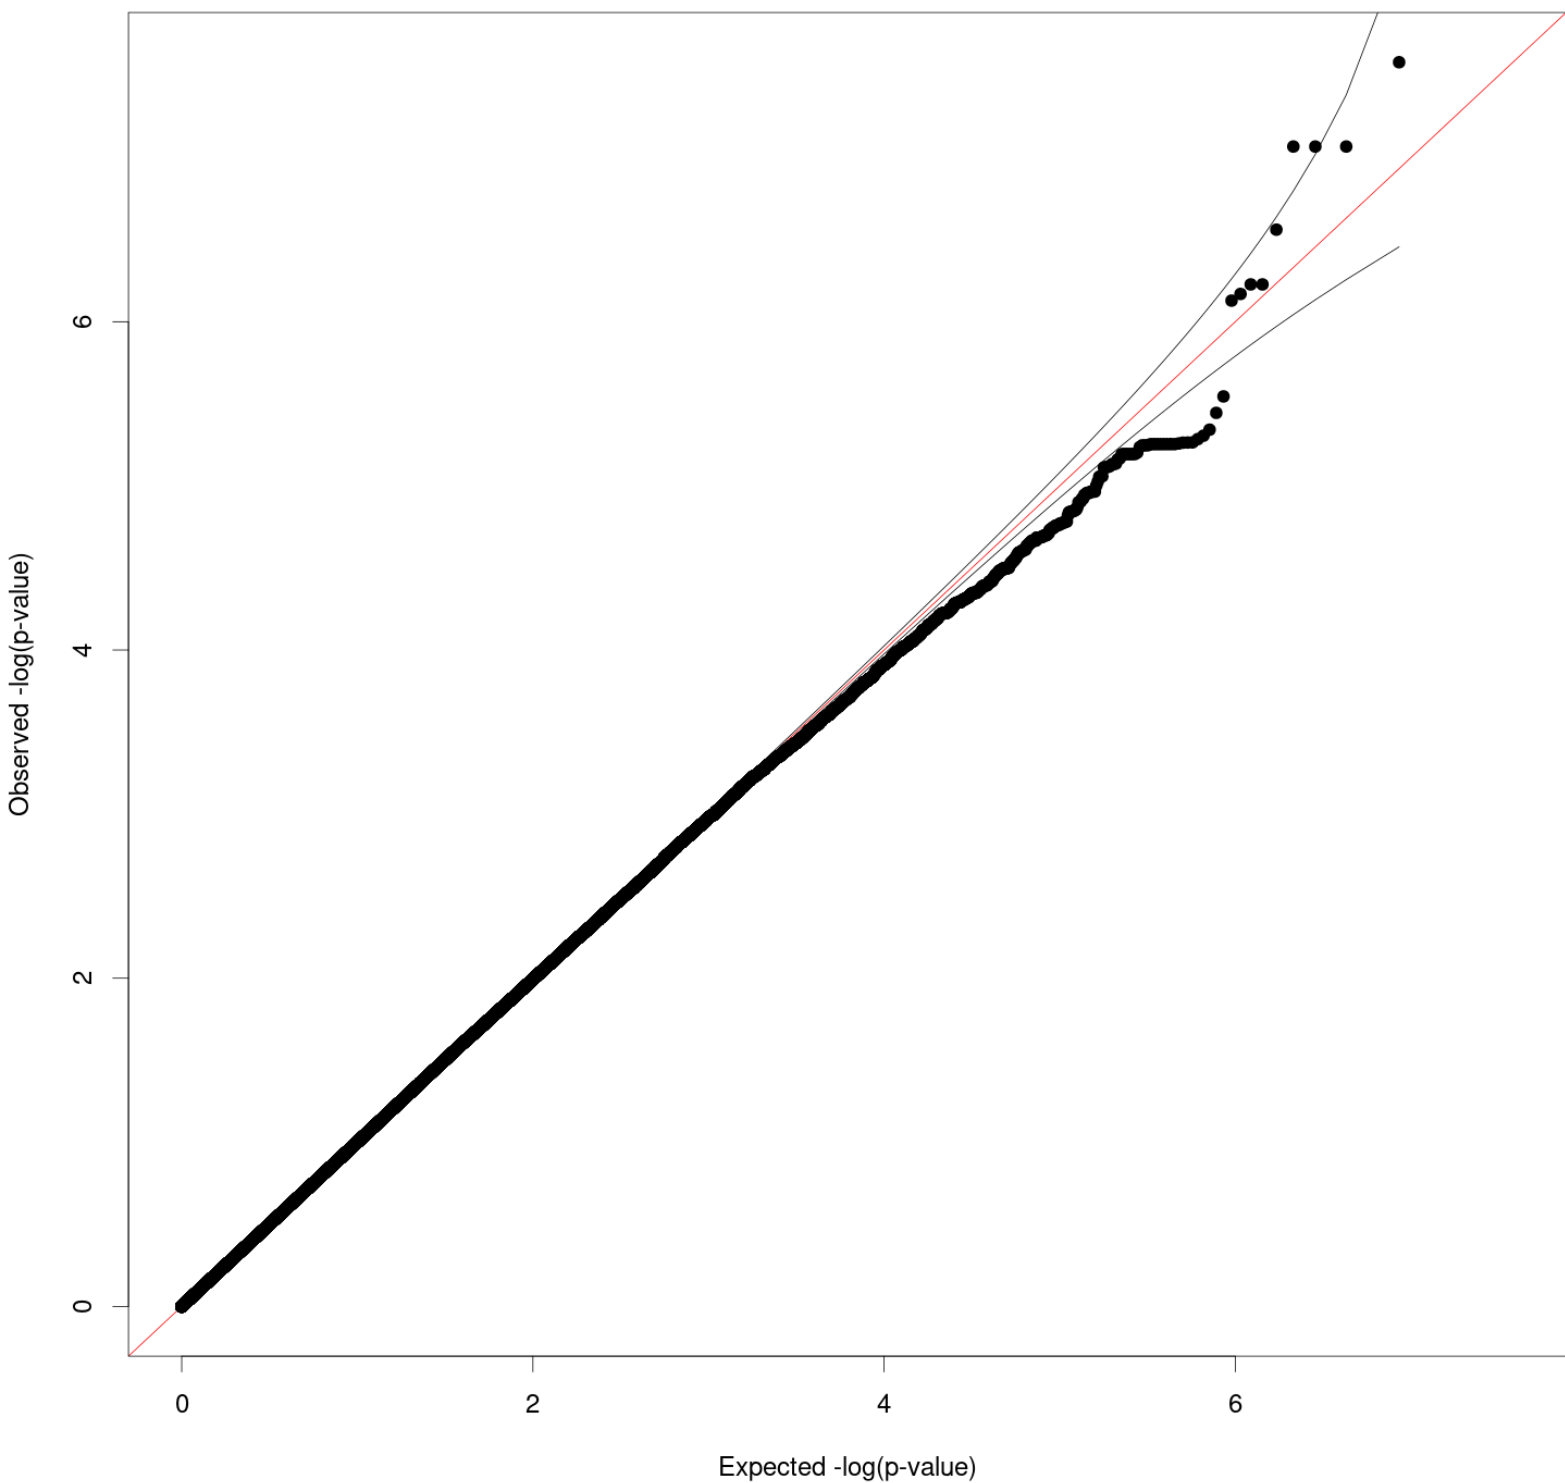

QQ plot for mz133.0647\_t24.9, trans-cinnamaldehyde  
inflation factor = 0.9969

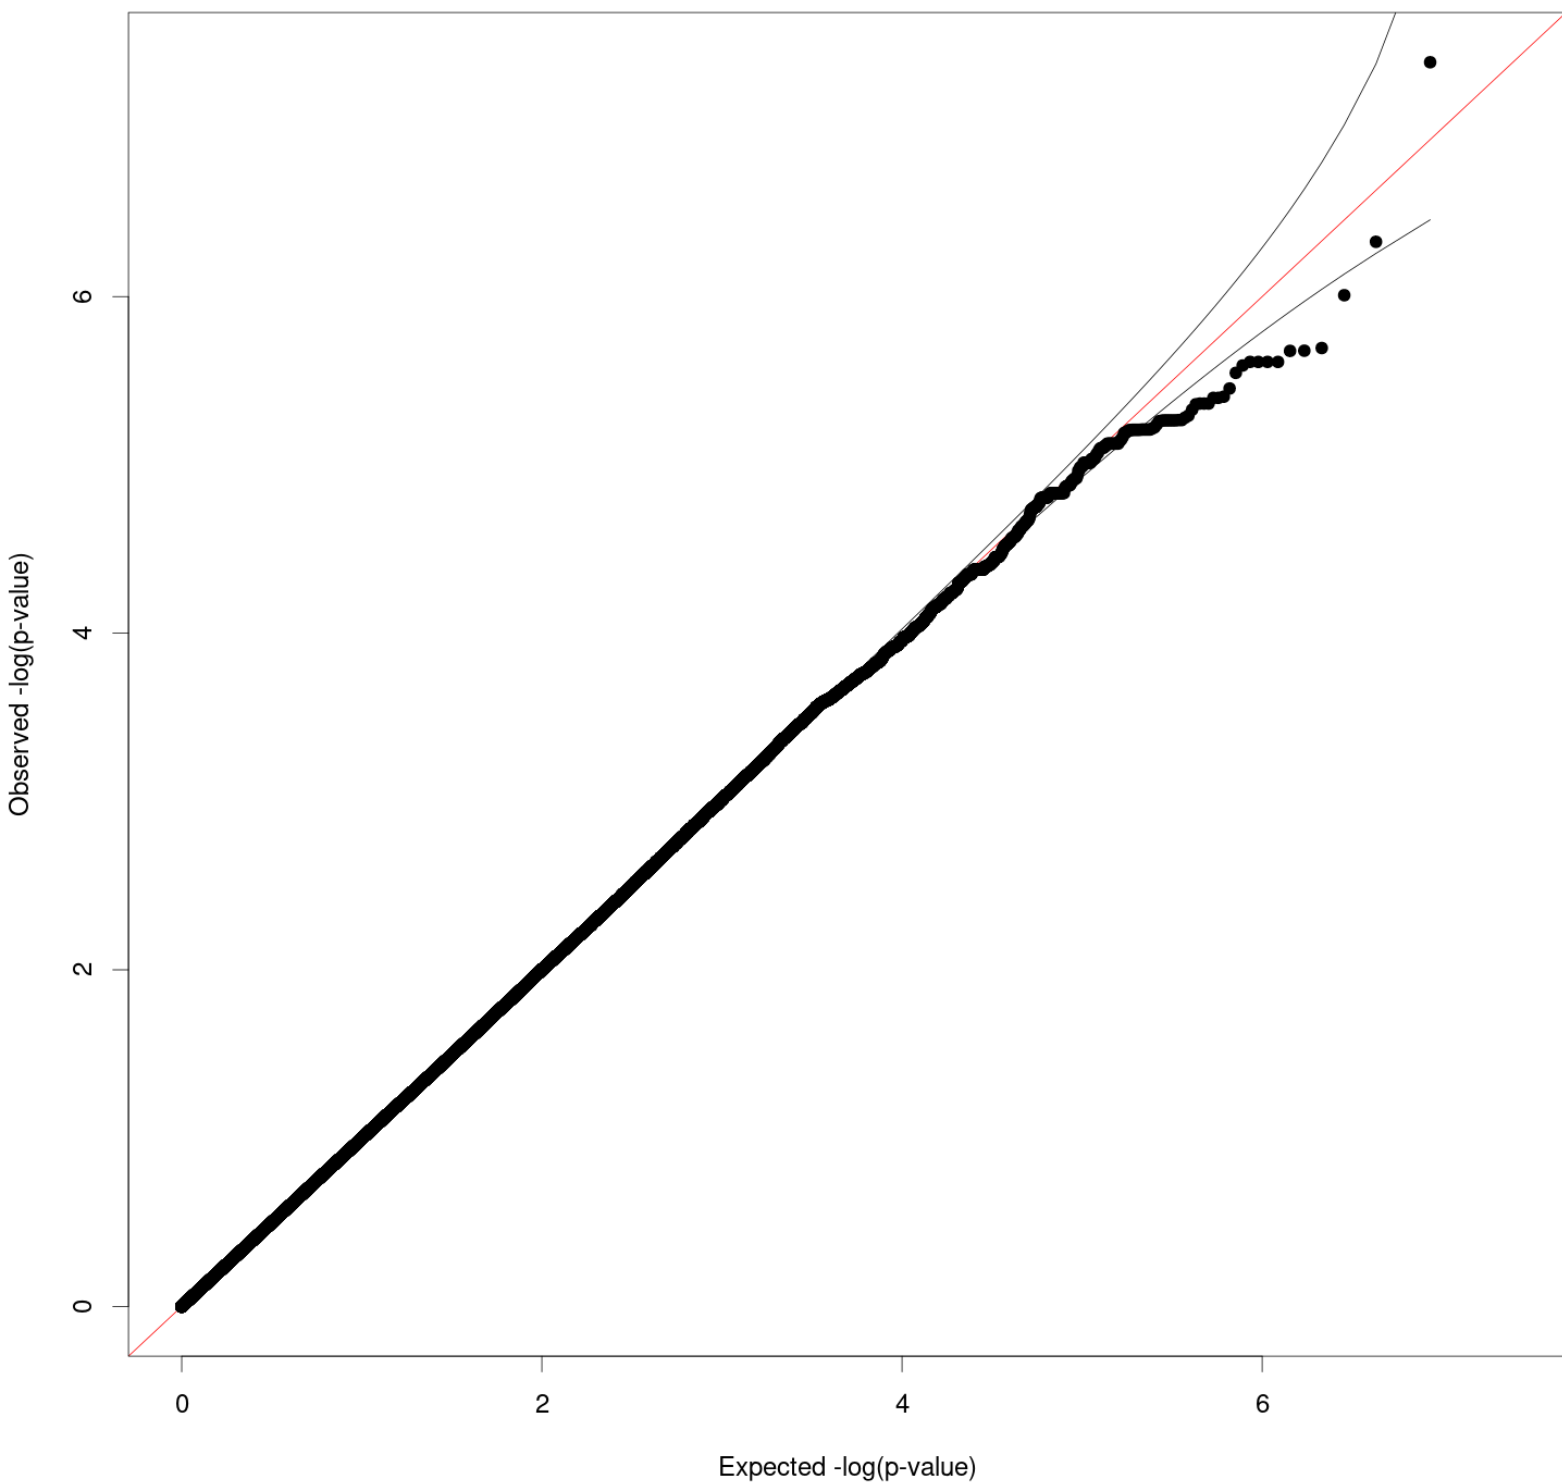

QQ plot for mz134.06\_t21.2, indoxyl sulfate  
inflation factor = 1.002

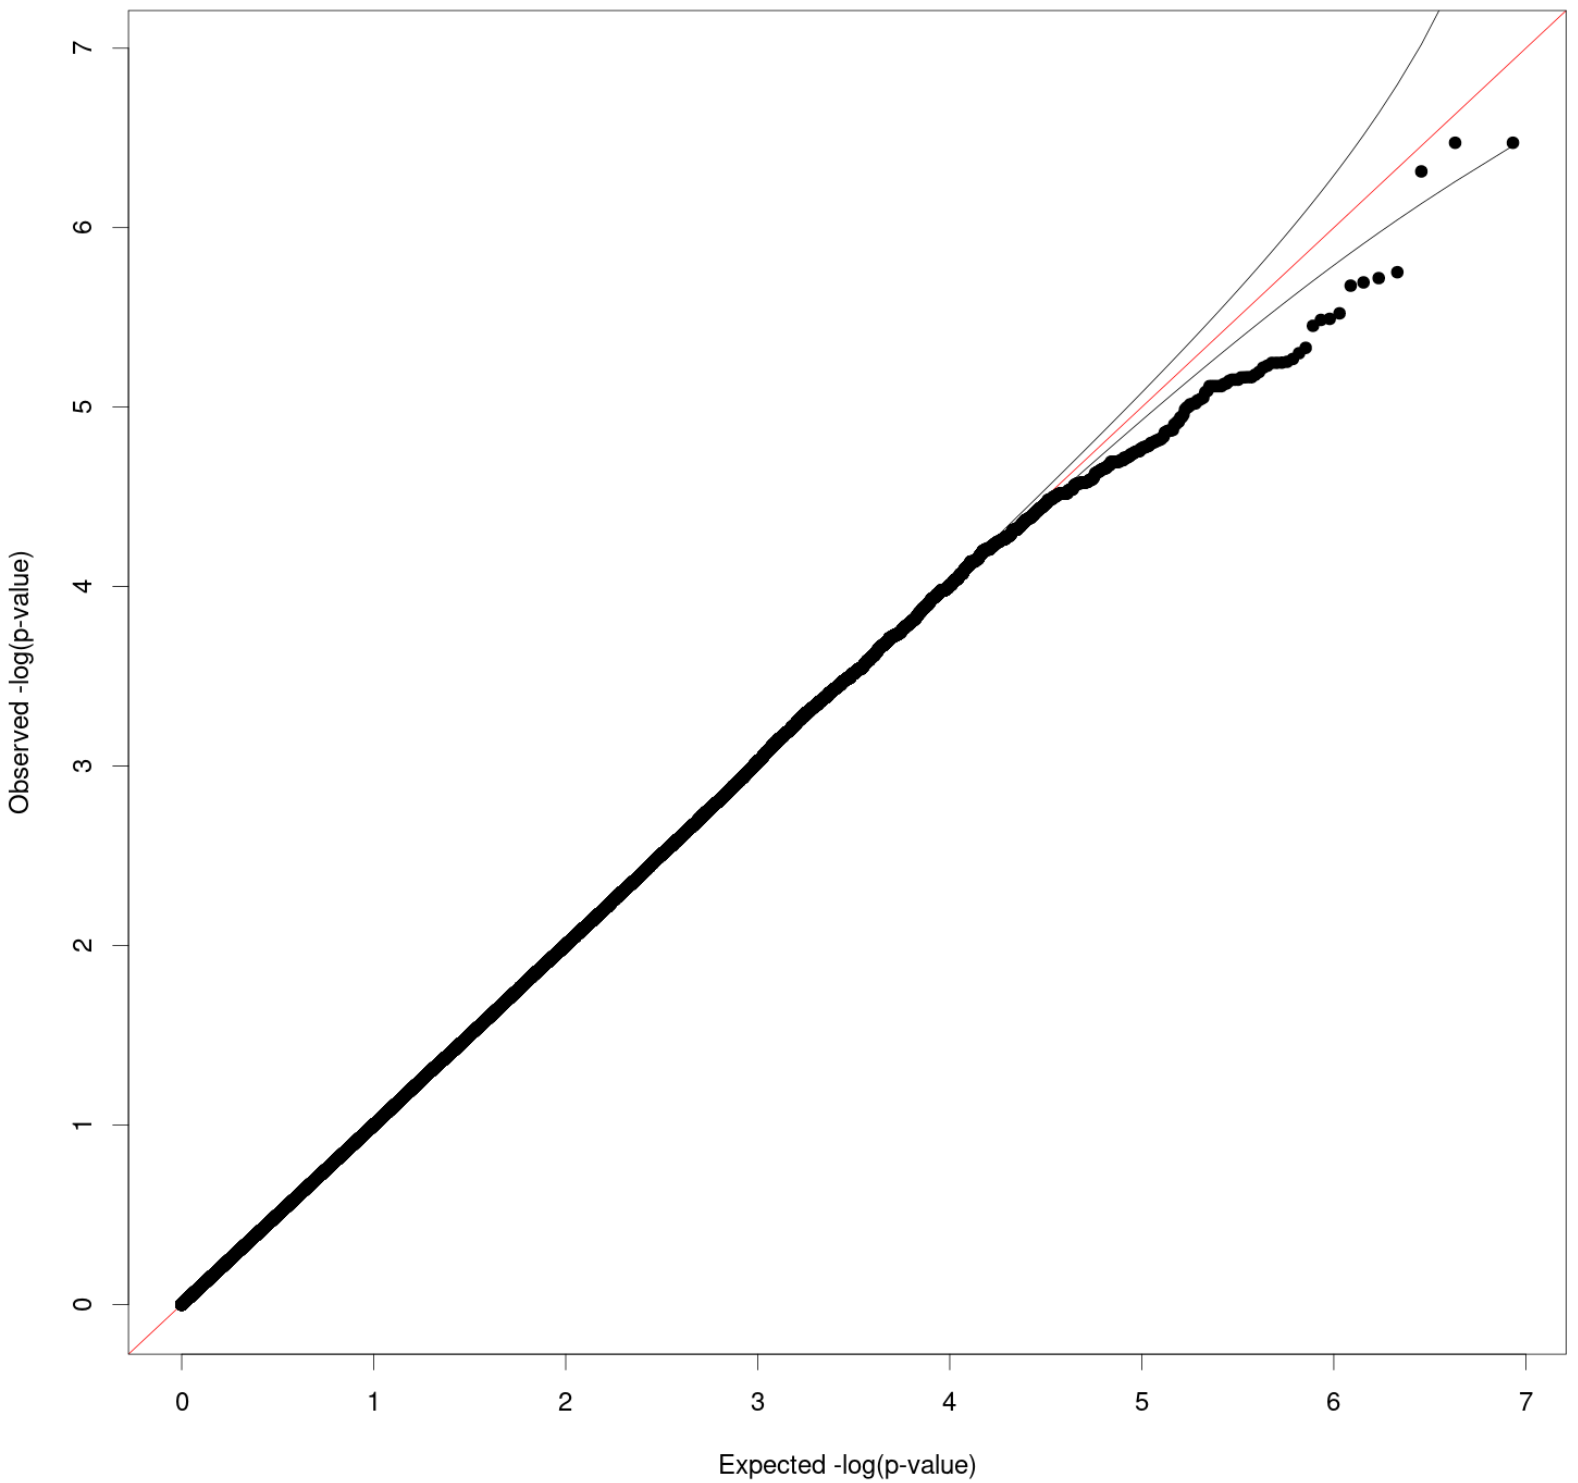

QQ plot for mz135.0306\_t23.2, hypoxanthine  
inflation factor = 1.003

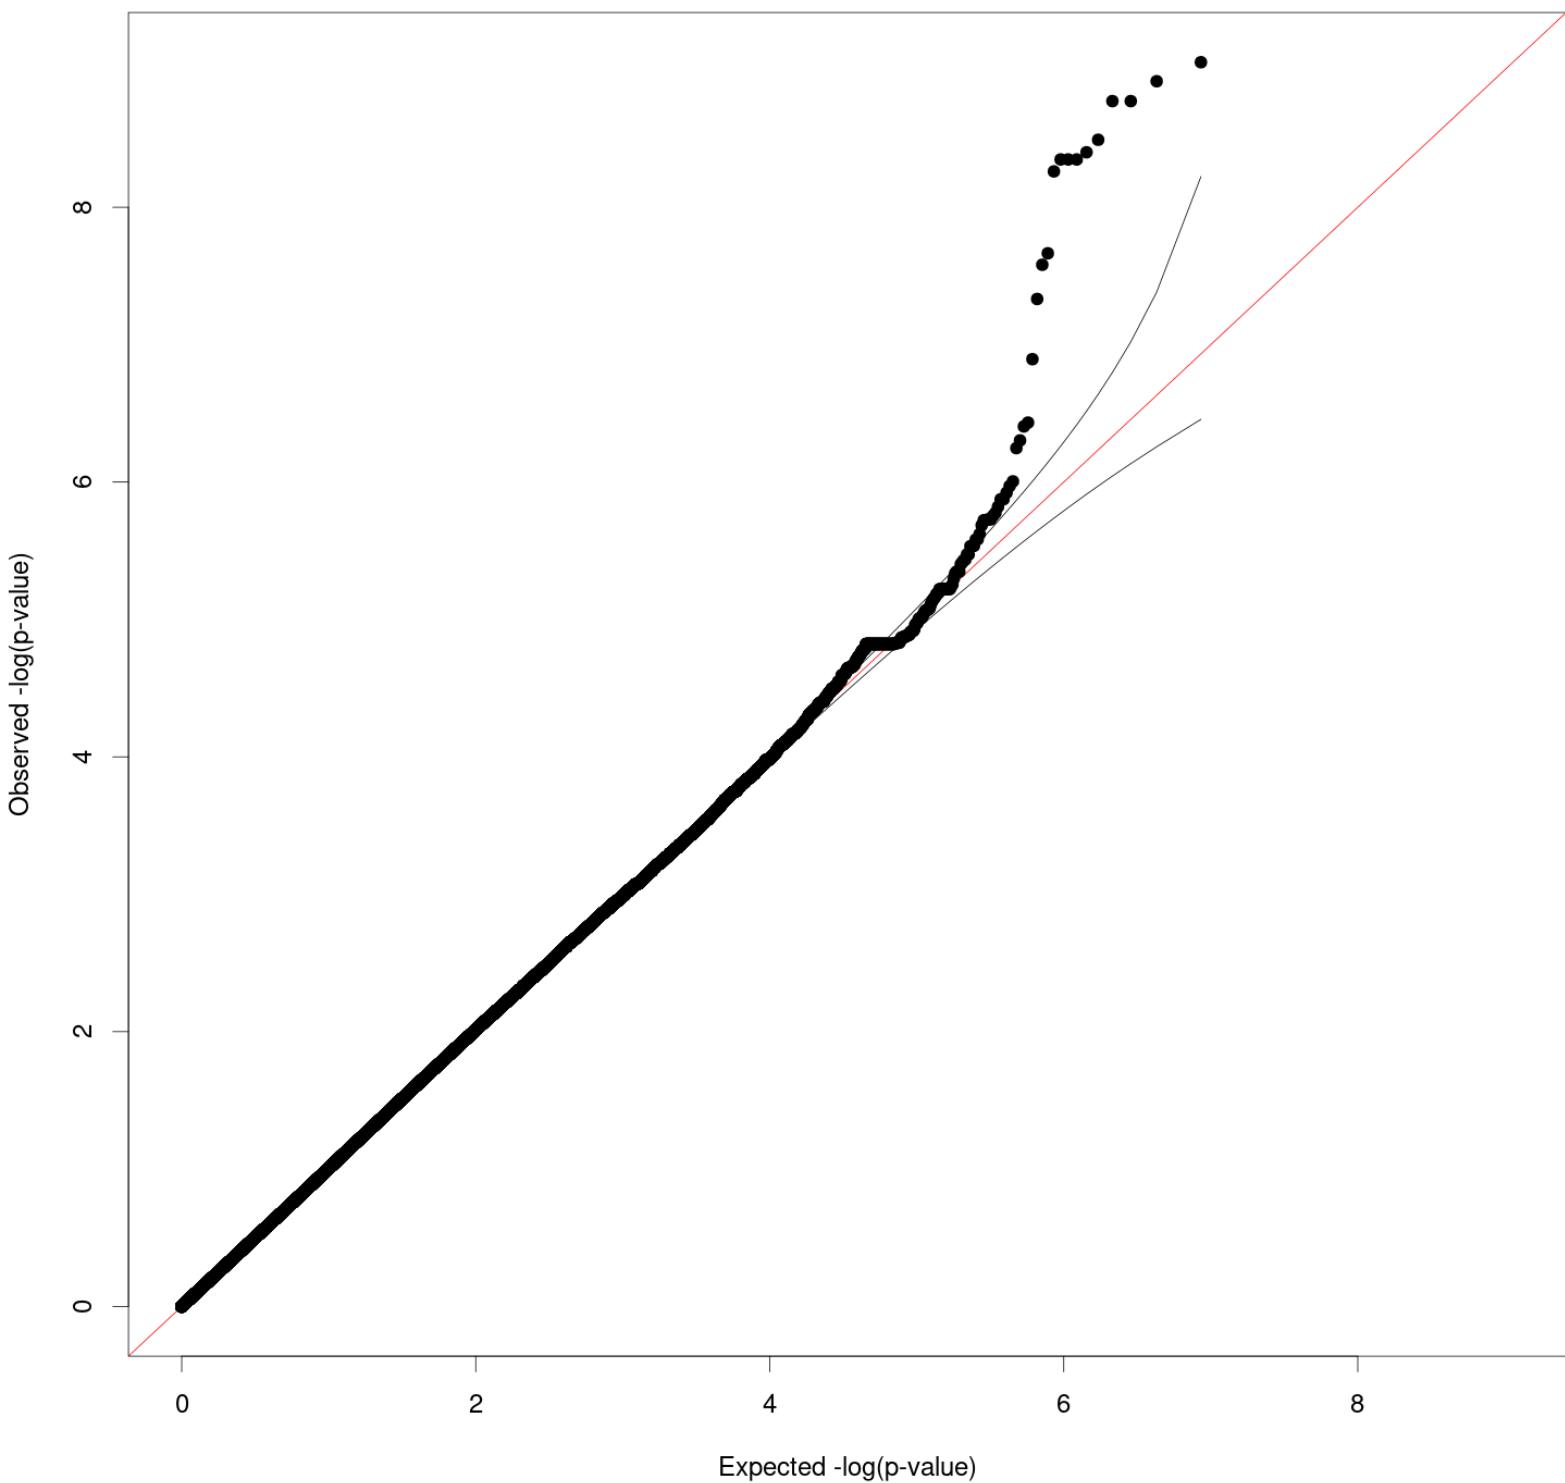

QQ plot for mz136.0428\_t56.3, homocysteine  
inflation factor = 0.9928

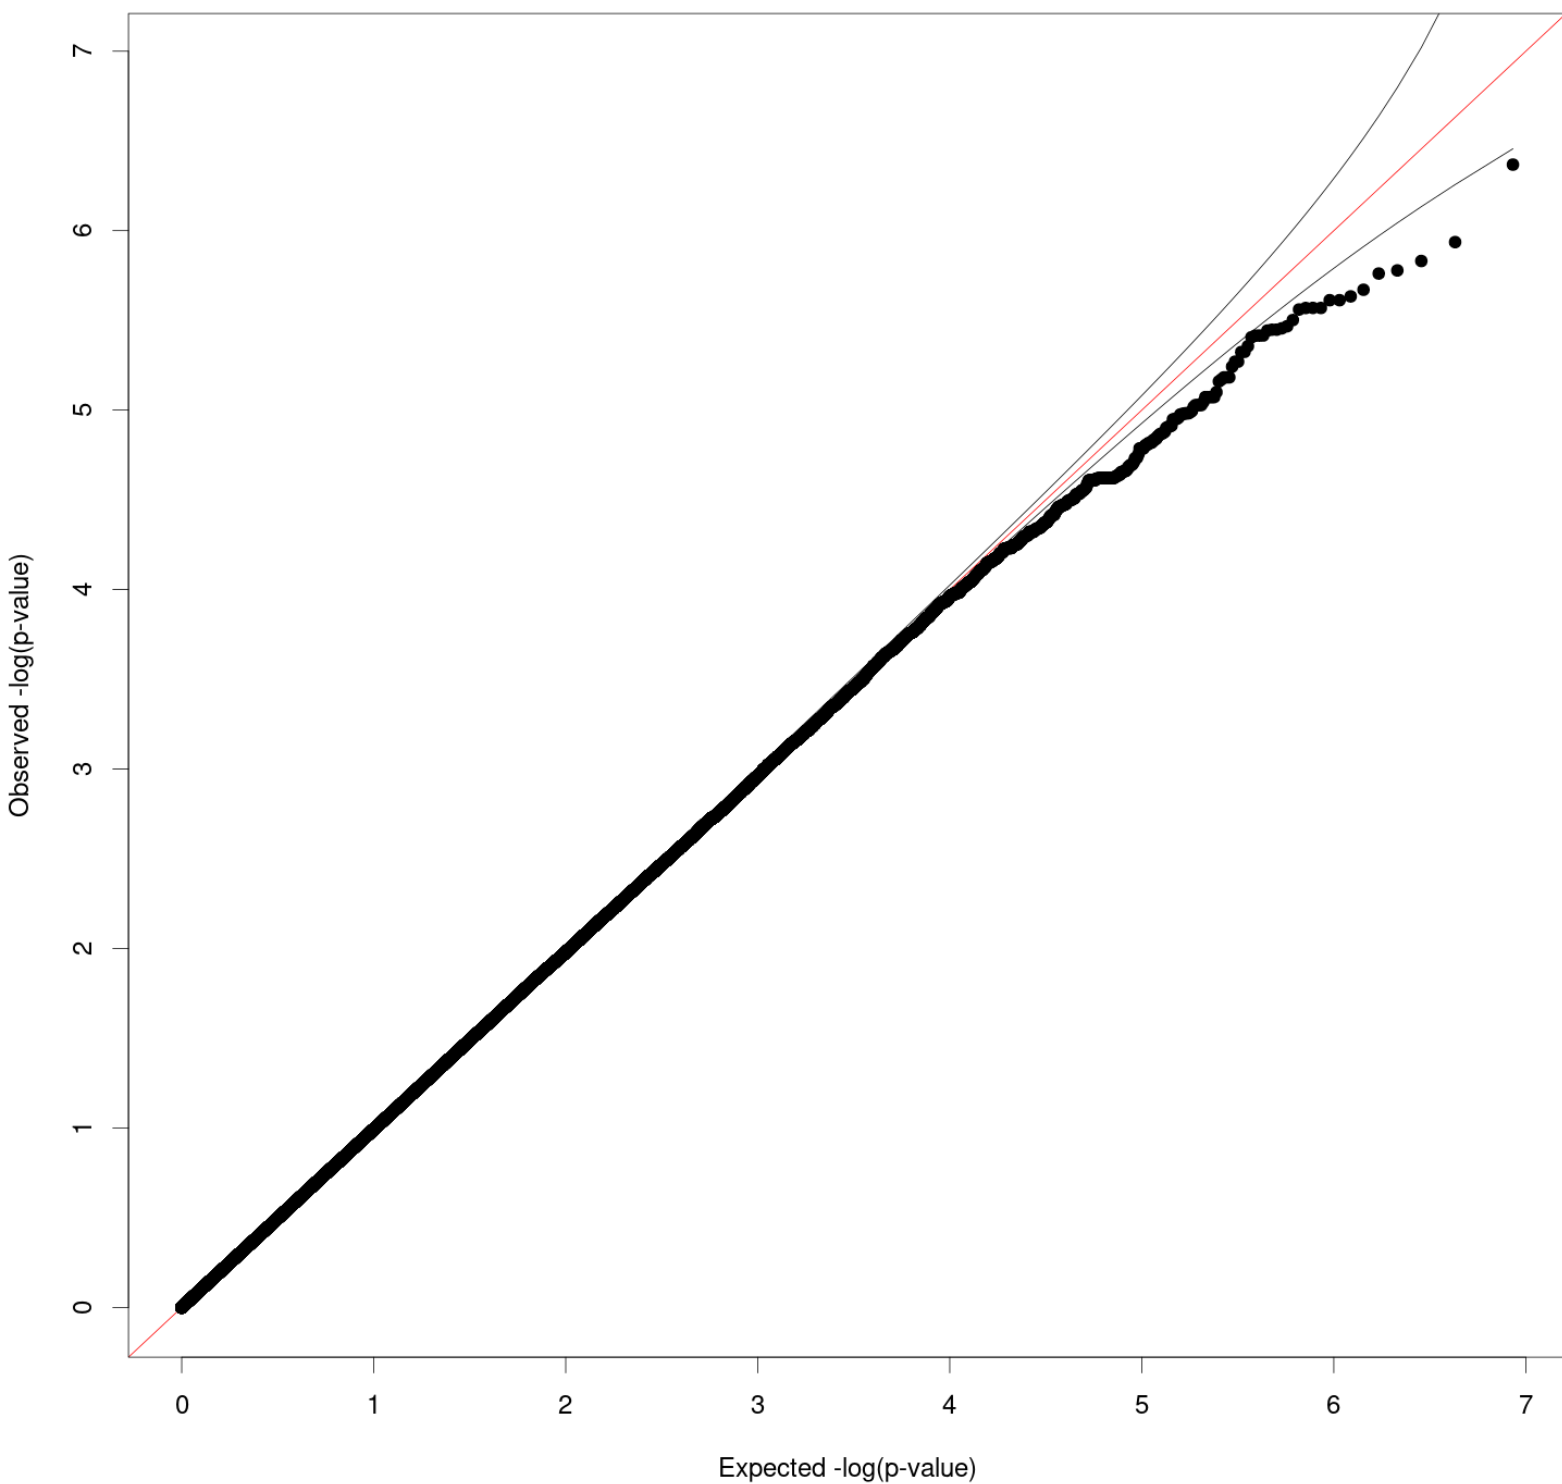

QQ plot for mz137.0457\_t39.7, hypoxanthine  
inflation factor = 0.9998

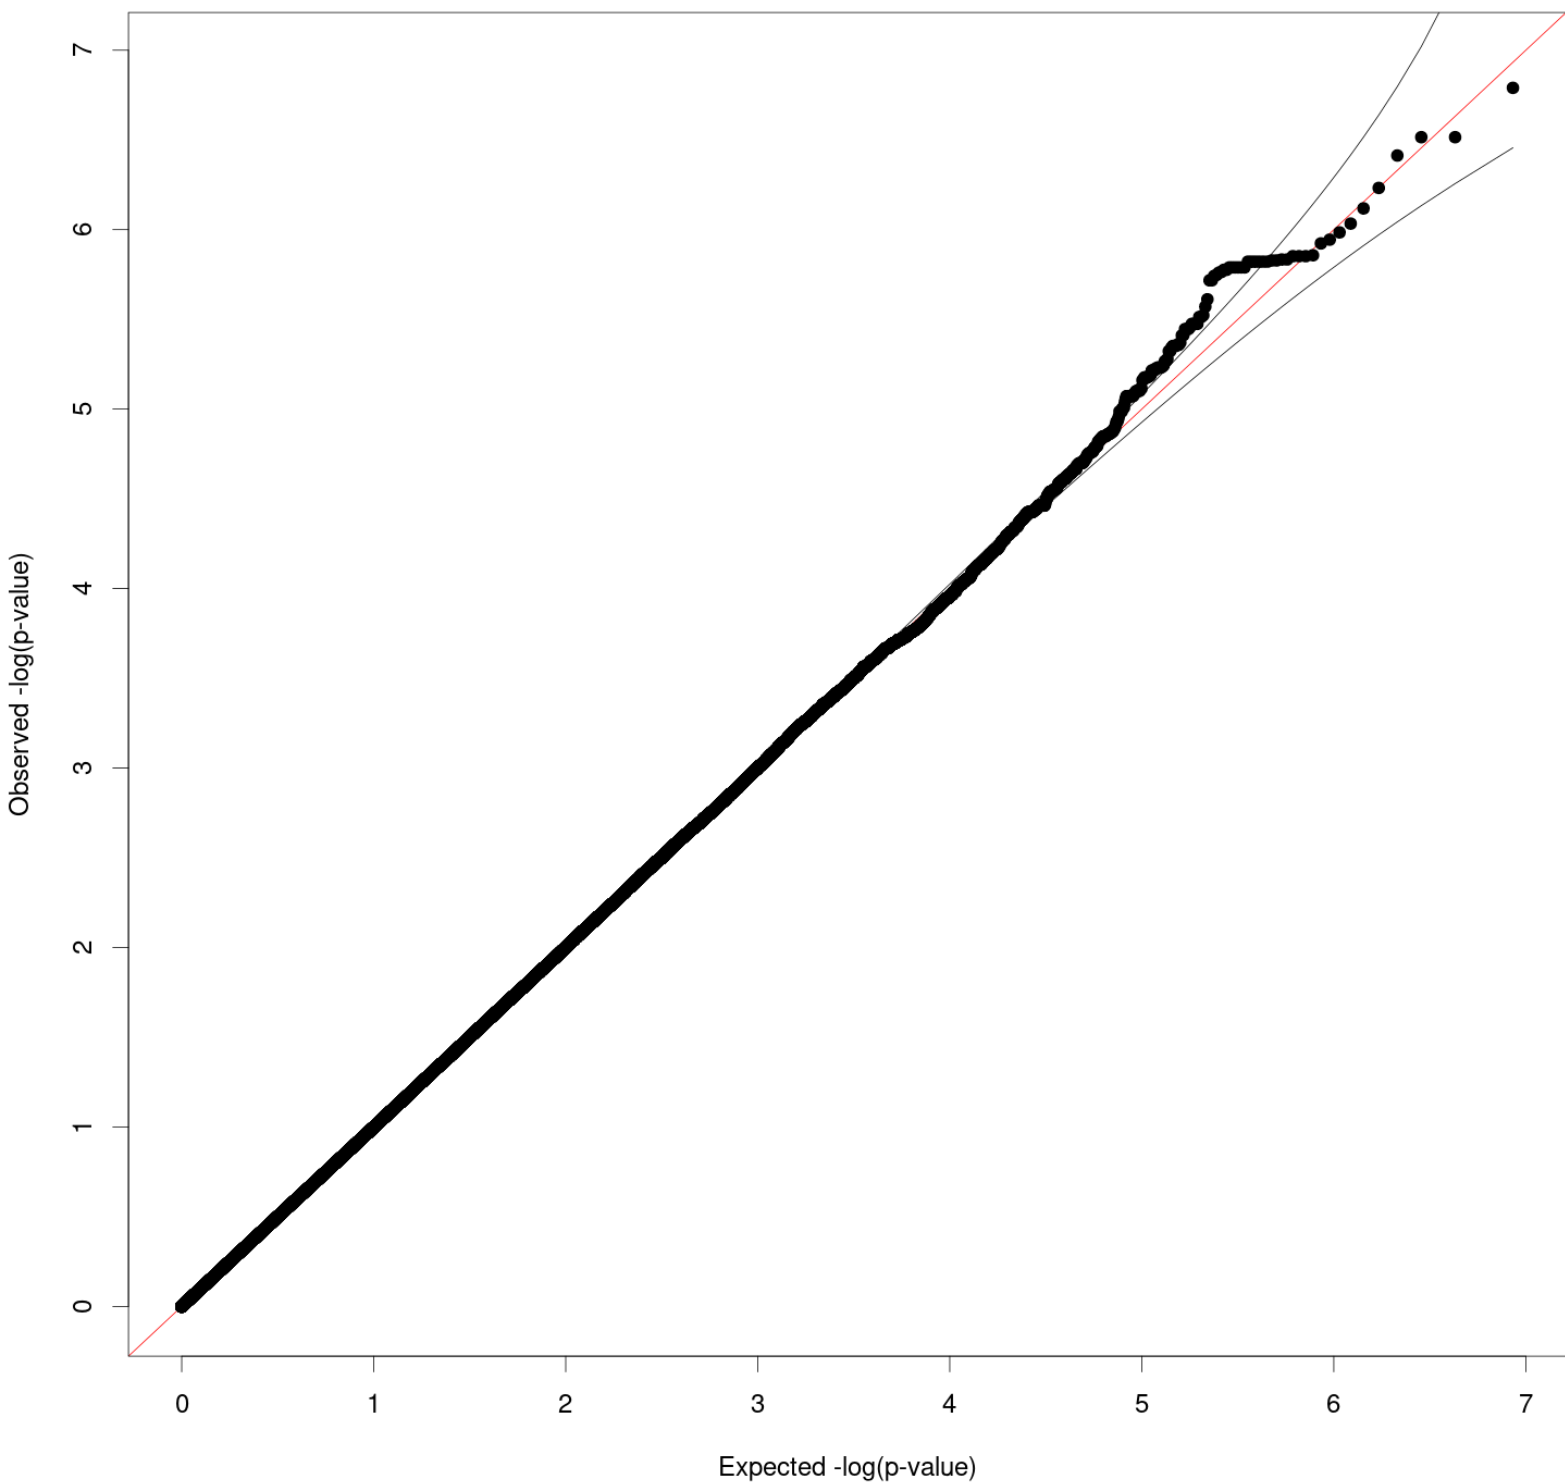

QQ plot for mz138.055\_t53.8, trigonelline  
inflation factor = 0.9912

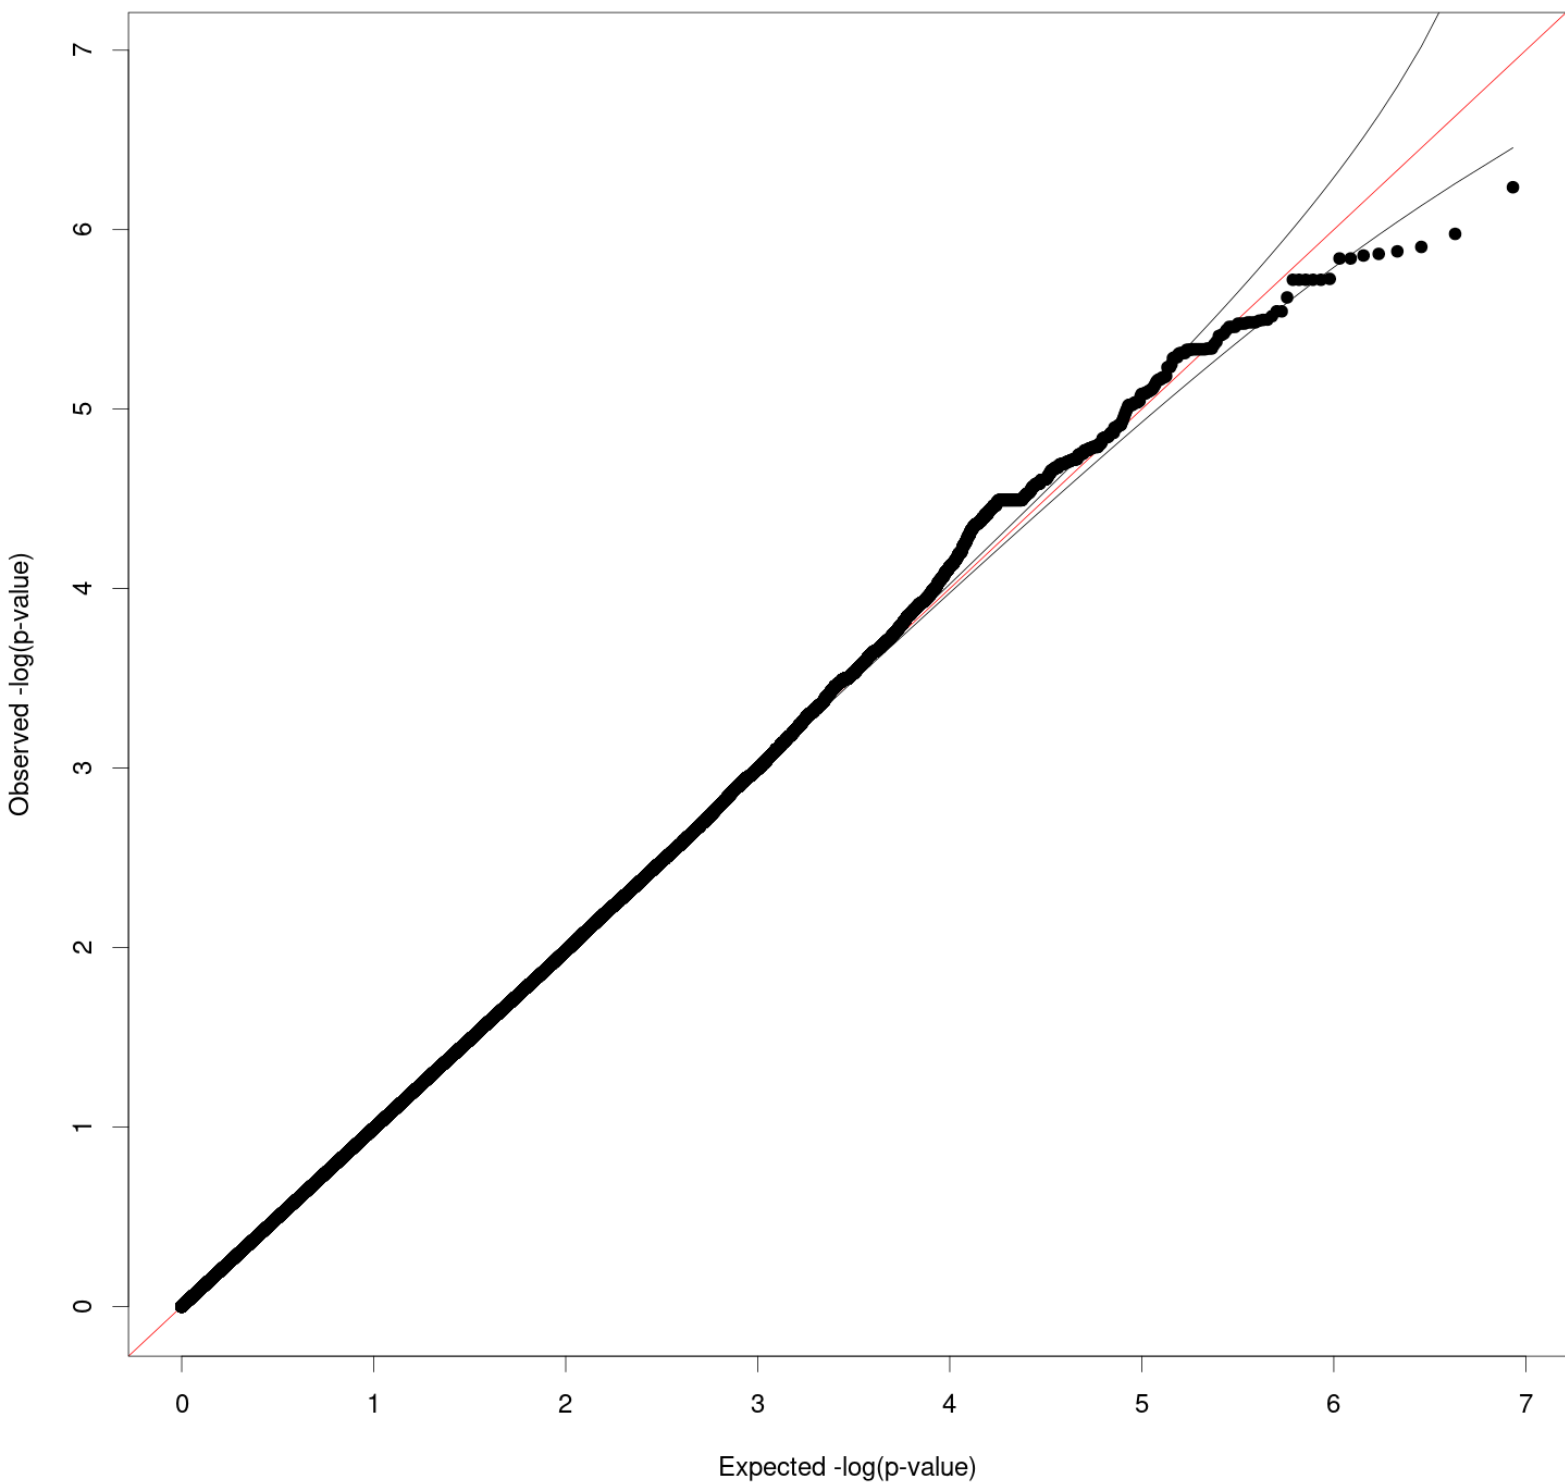



QQ plot for mz138.0795\_t55.7, 1-methylnicotinamide  
inflation factor = 1.003

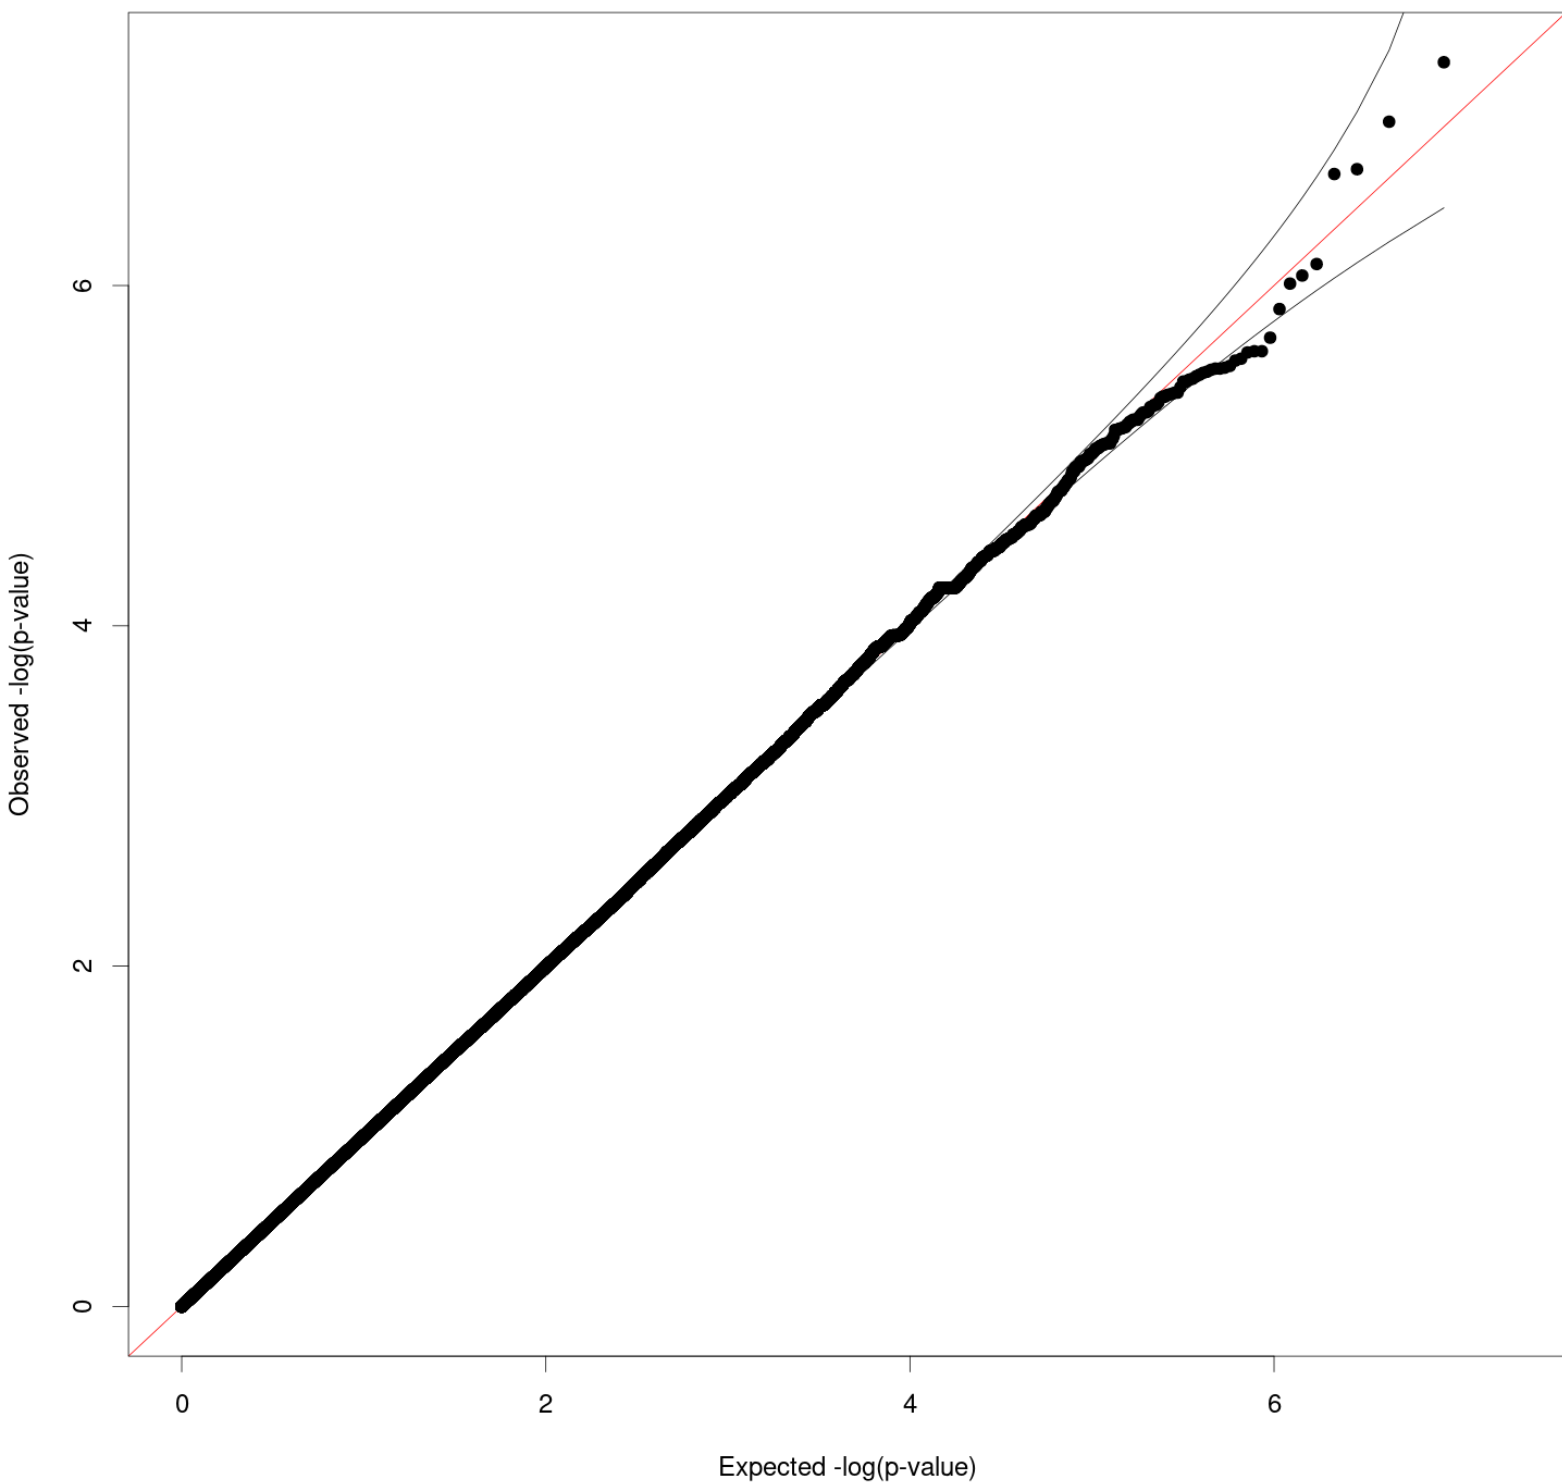

QQ plot for mz139.0502\_t64.4, urocanate  
inflation factor = 1

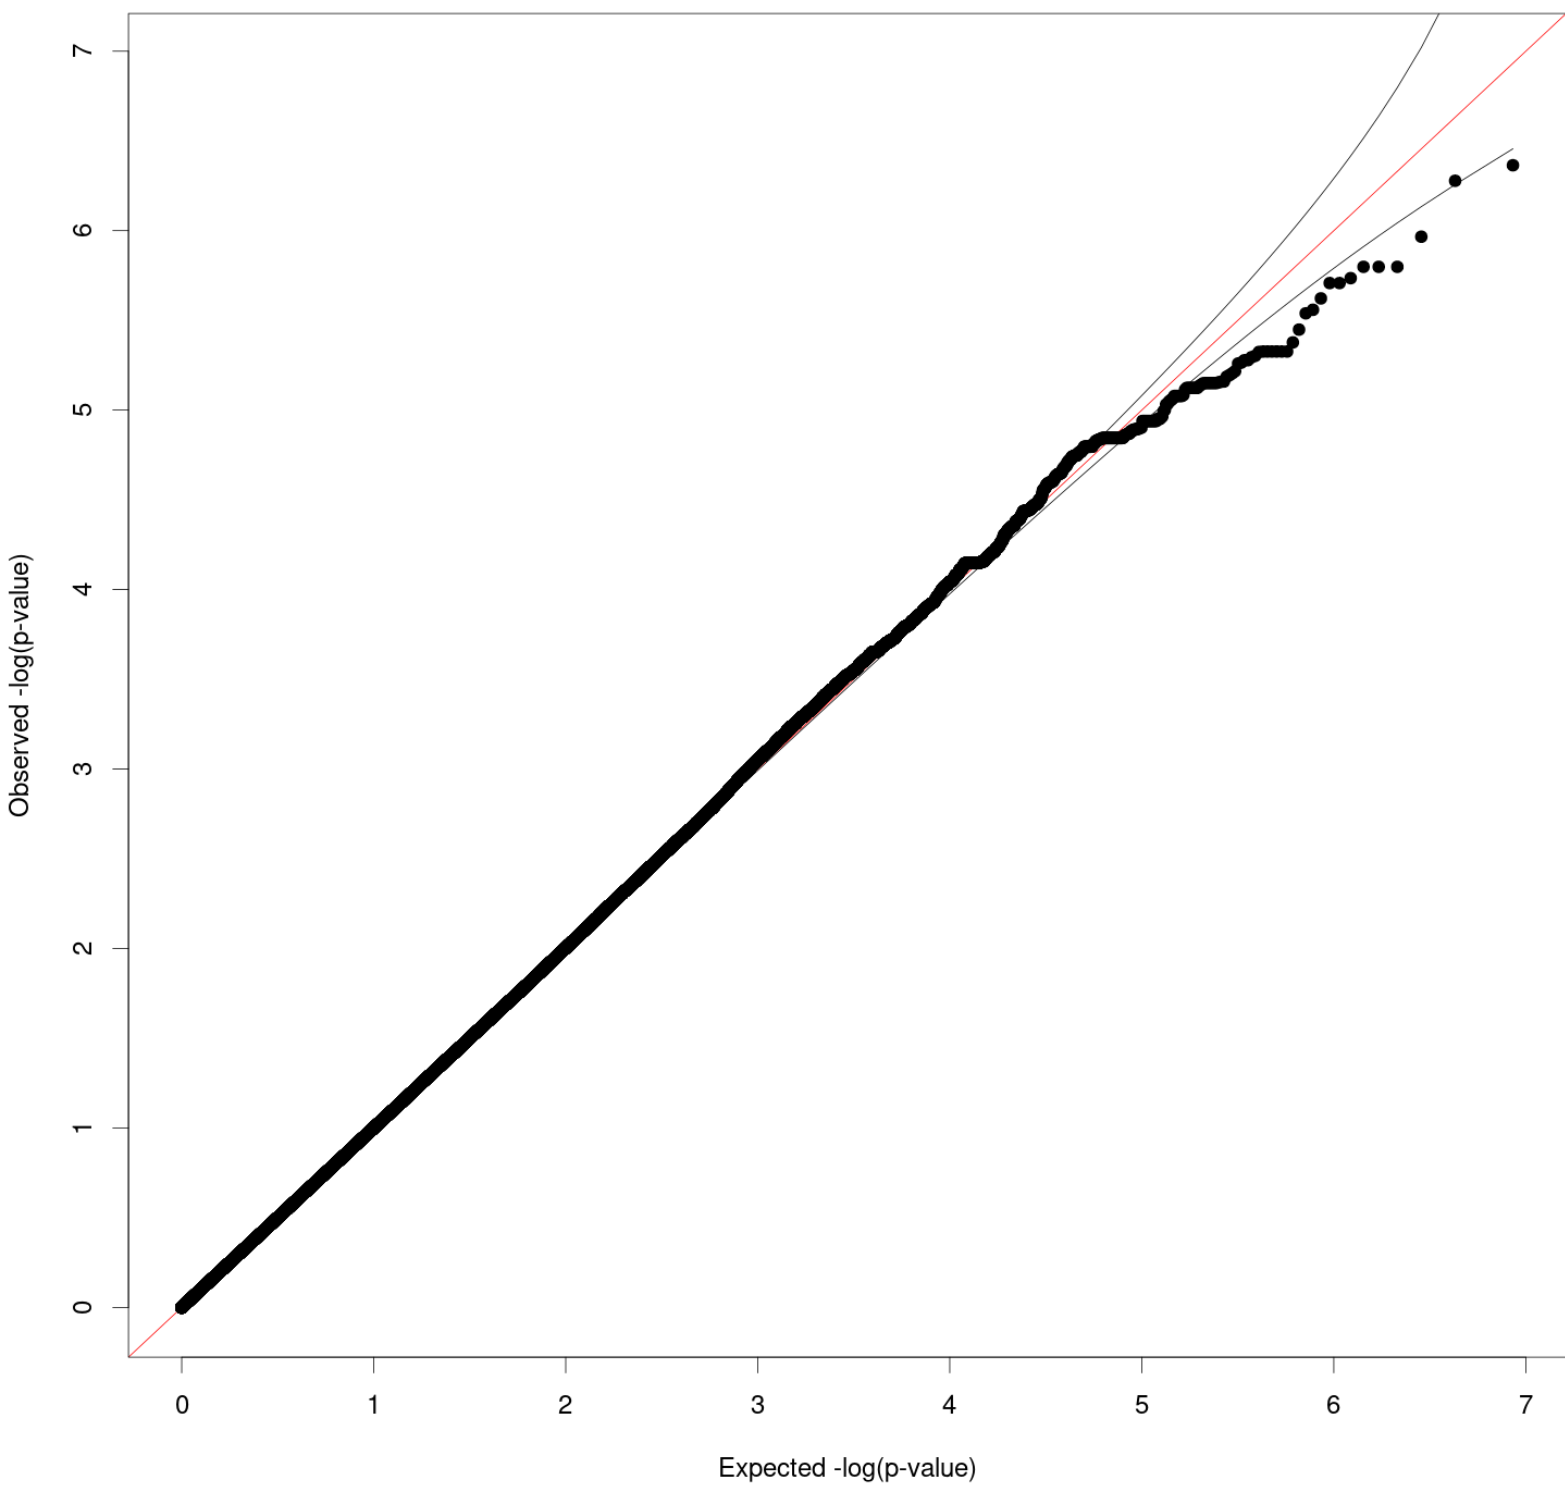

QQ plot for mz140.0118\_t36.8, ethanolamine phosphate  
inflation factor = 0.9929

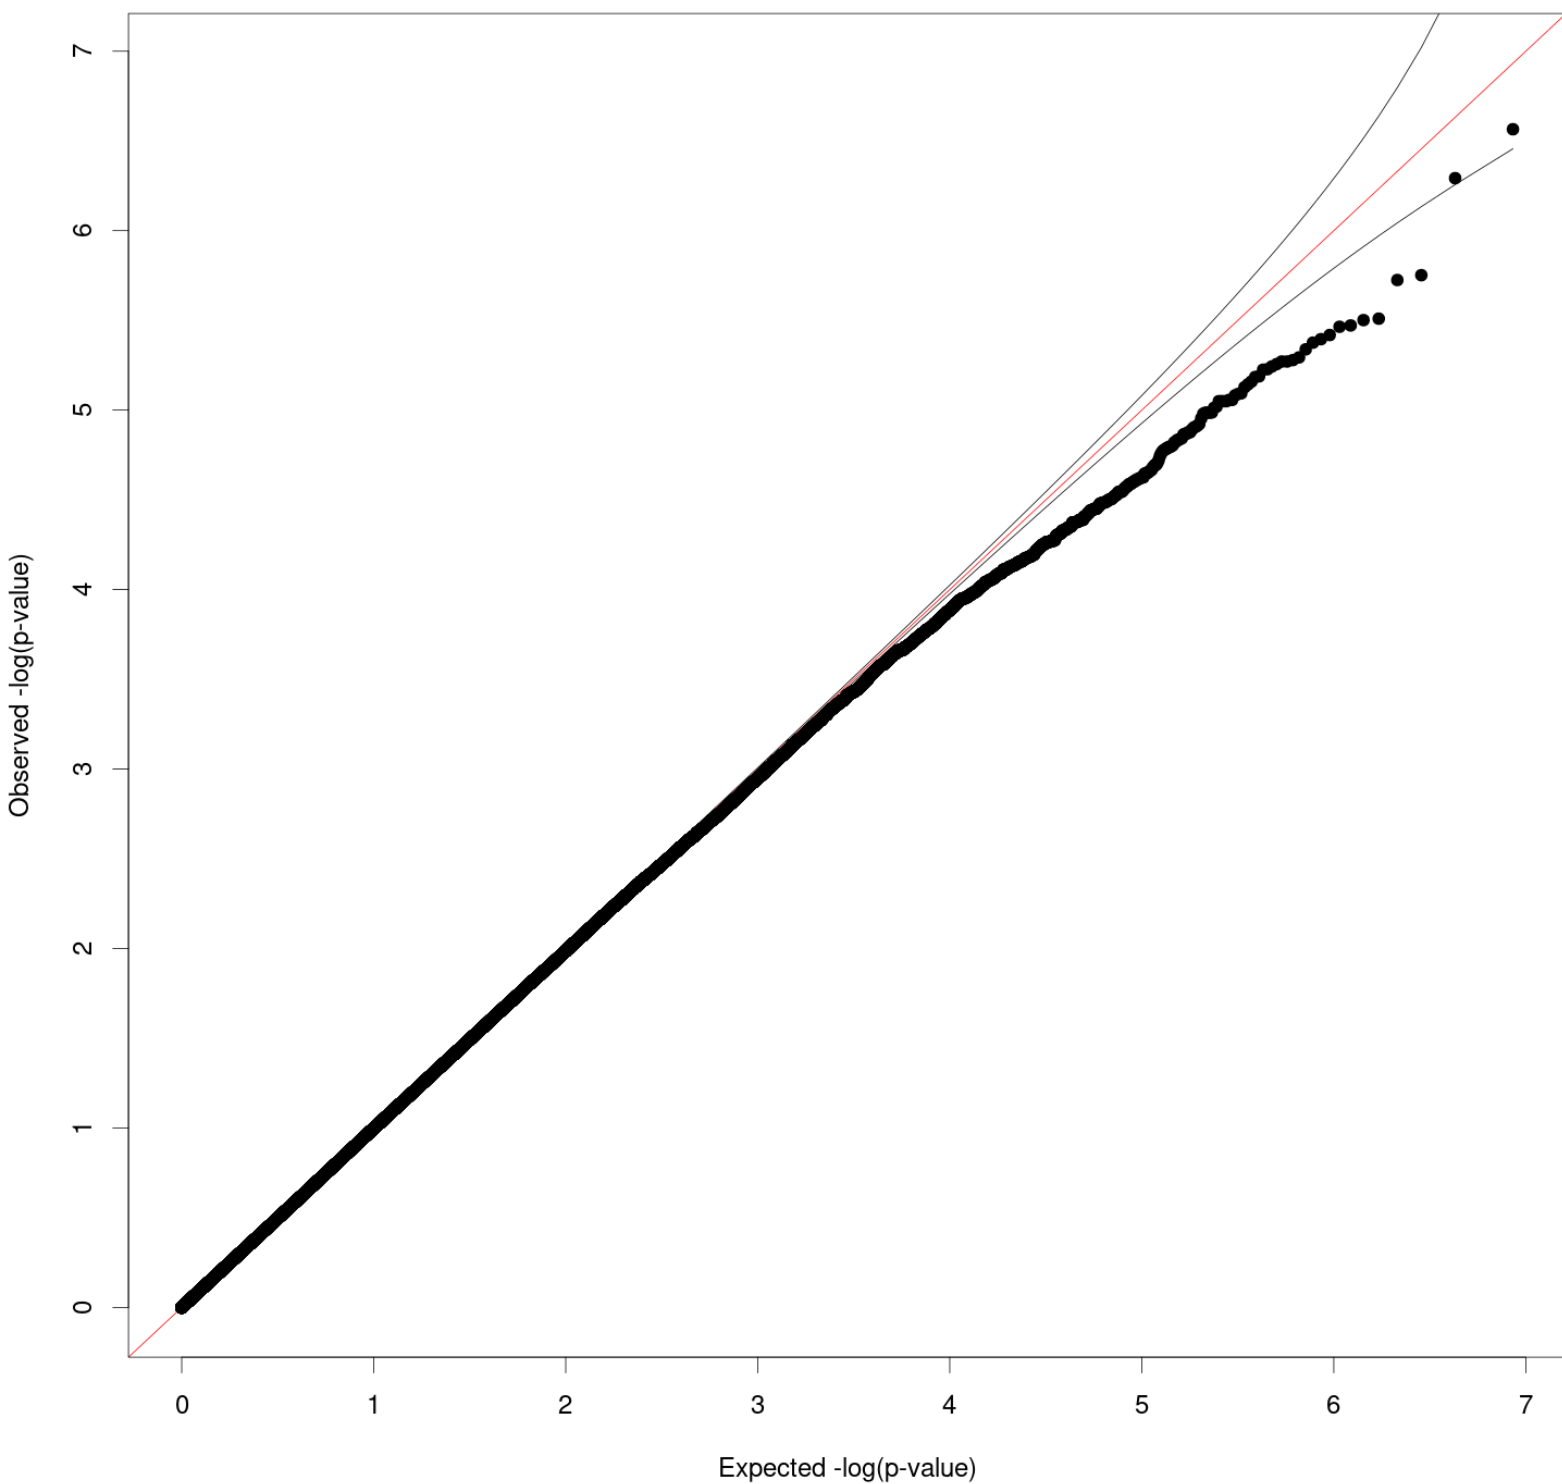

QQ plot for mz143.1077\_t59.1, caprylic acid  
inflation factor = 0.9963

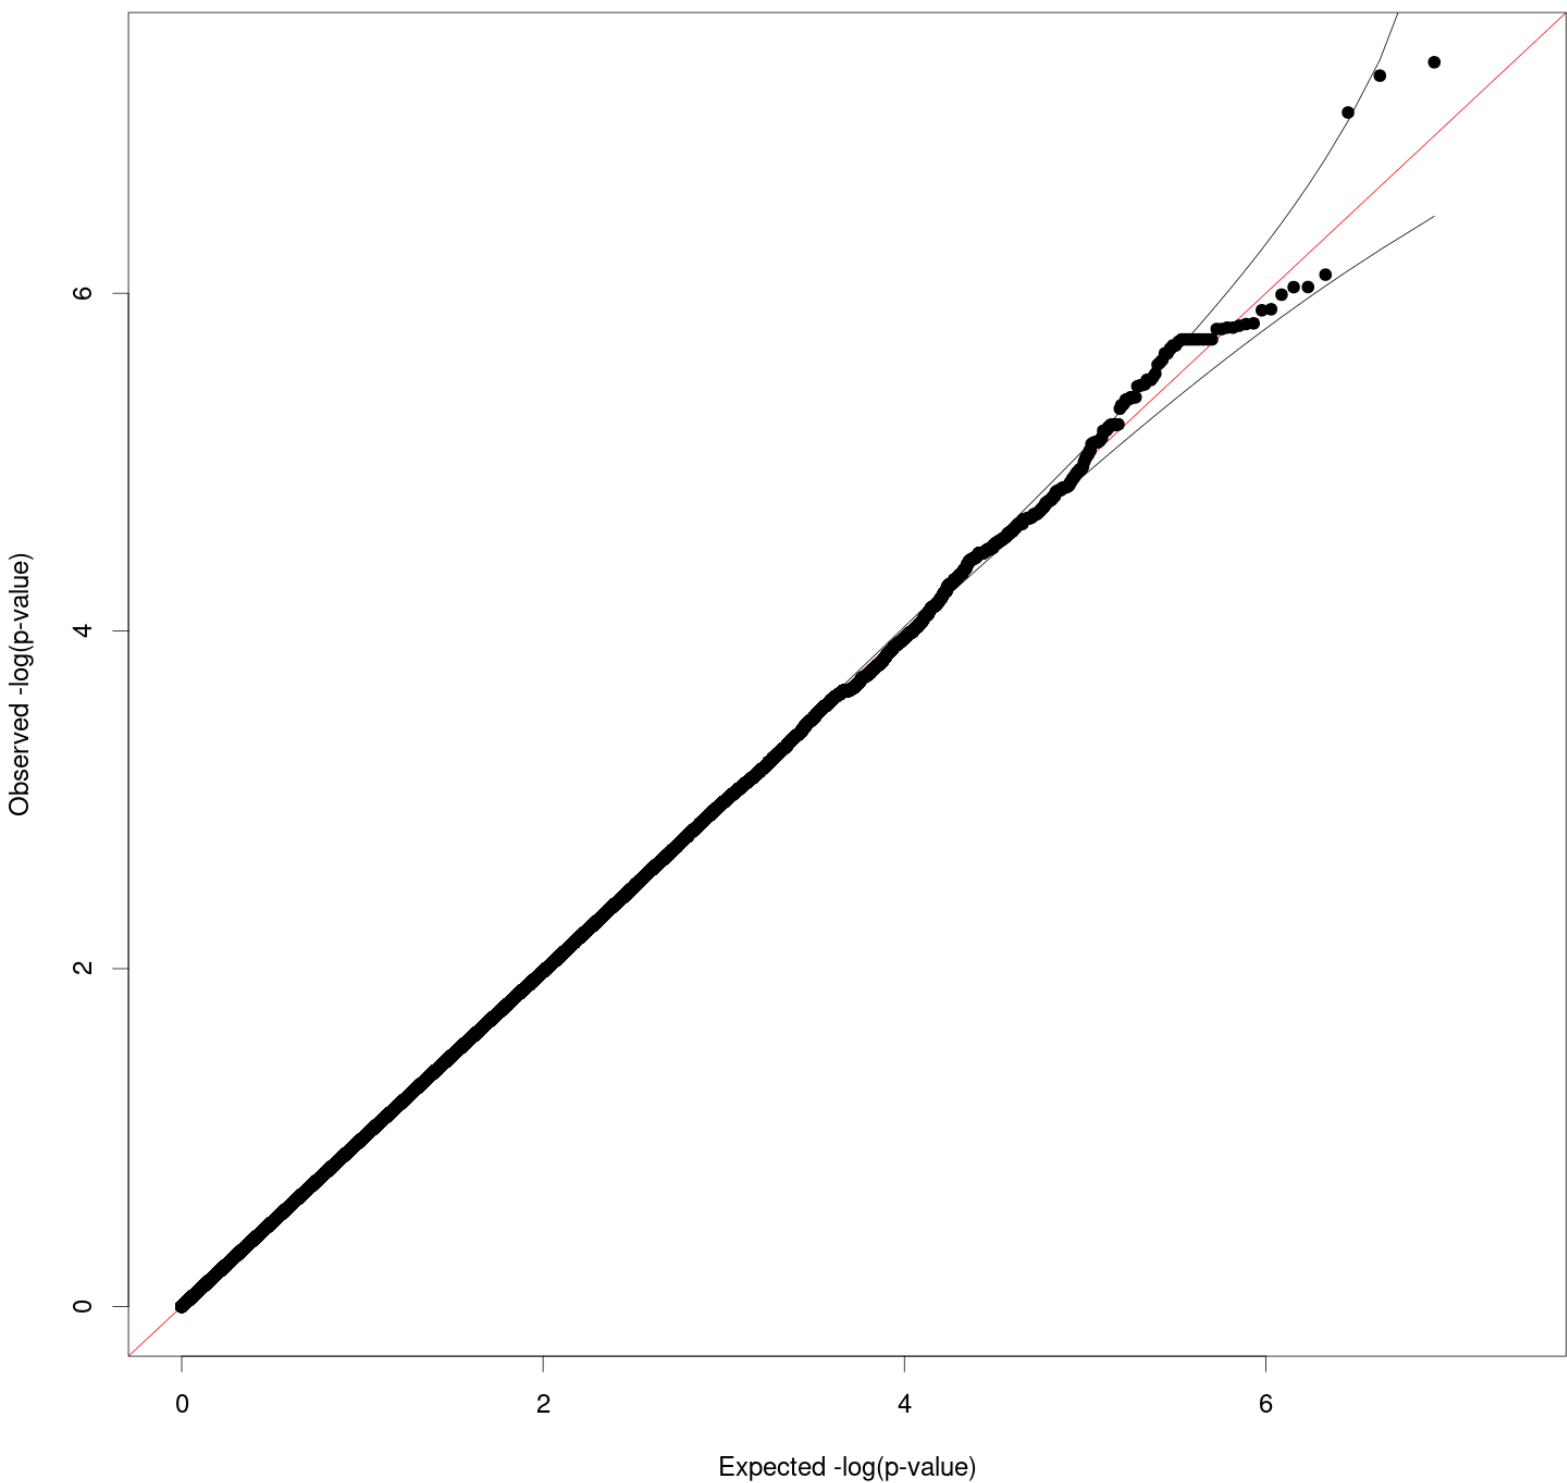

QQ plot for mz144.0807\_t46.2, 1-naphthylamine  
inflation factor = 1.001

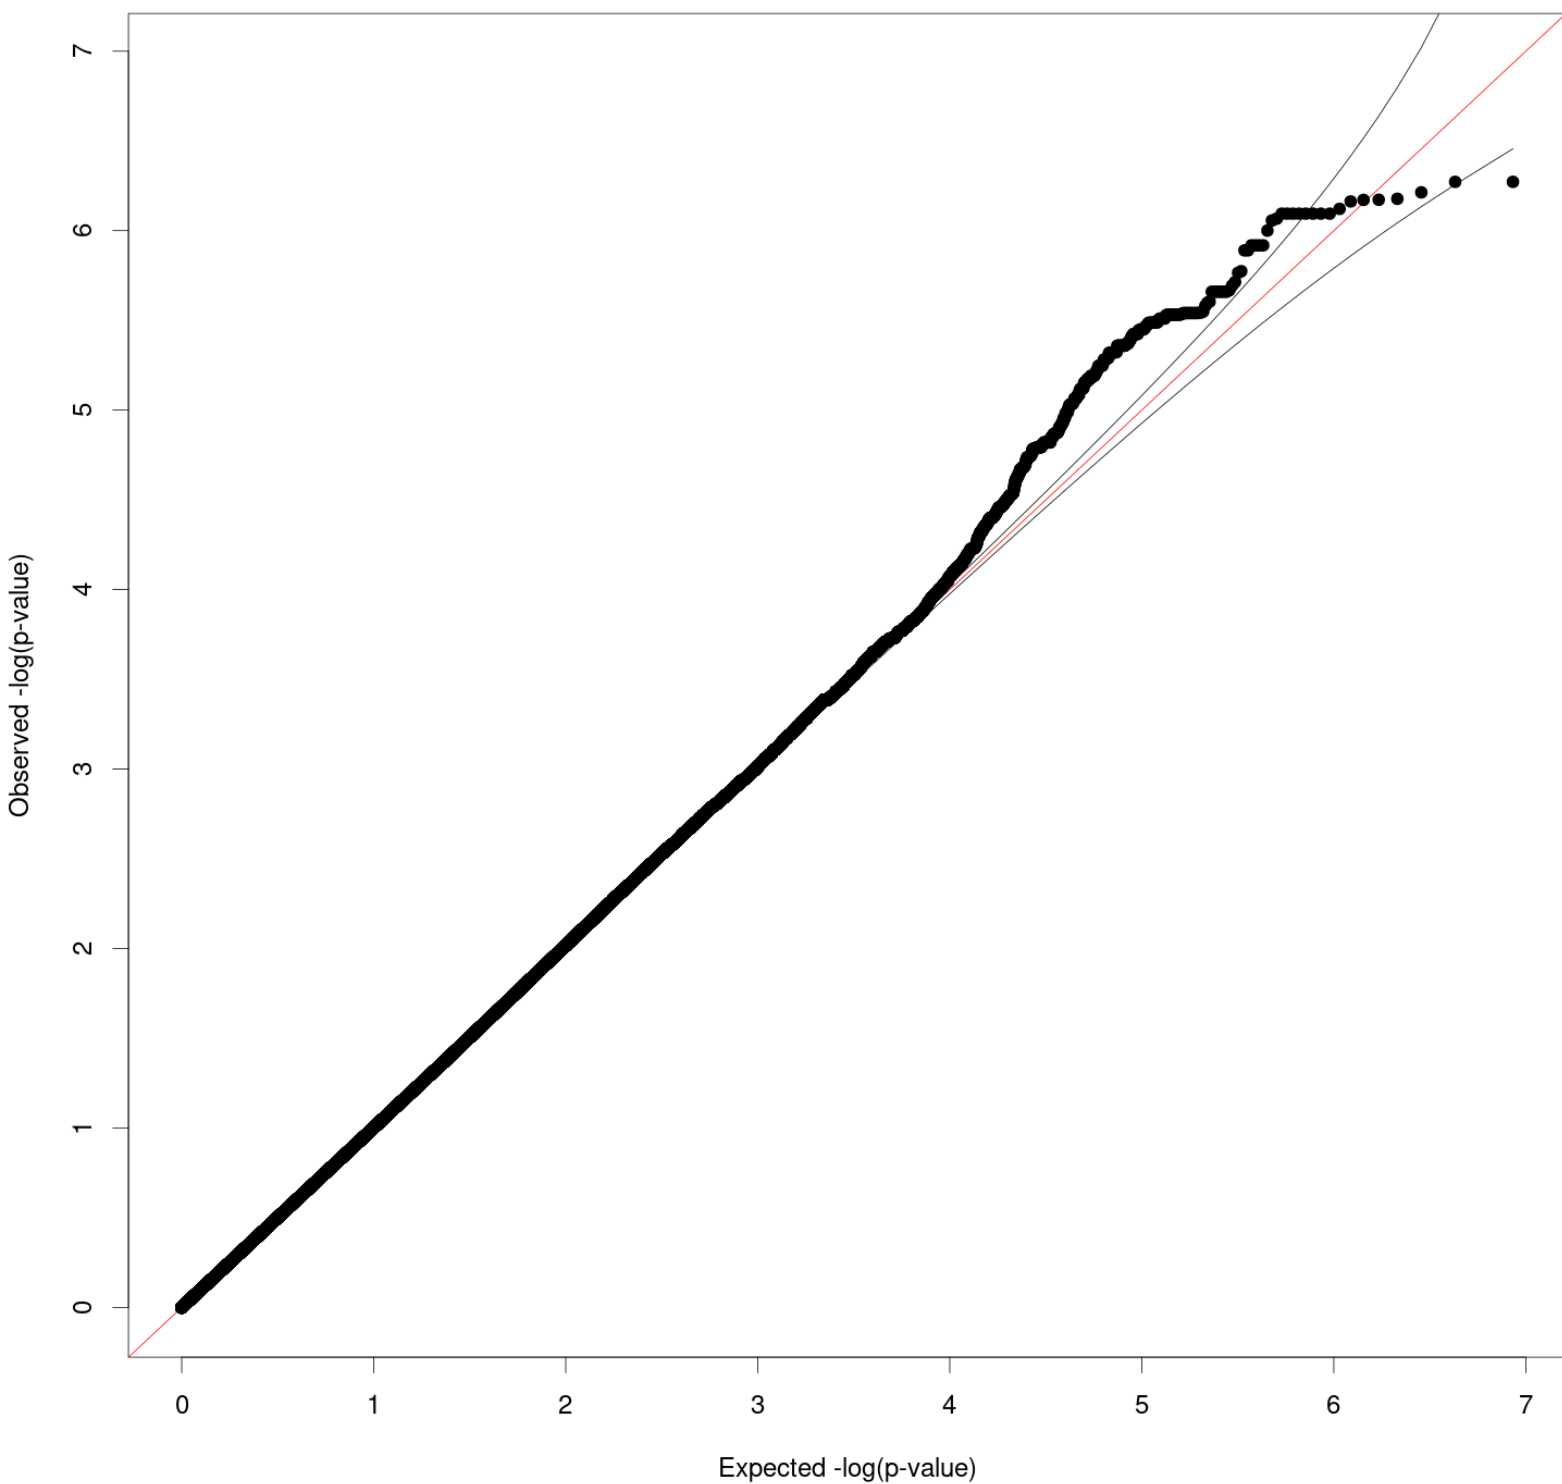

QQ plot for mz145.0142\_t24.5, alpha-ketoglutaric acid  
inflation factor = 1.001

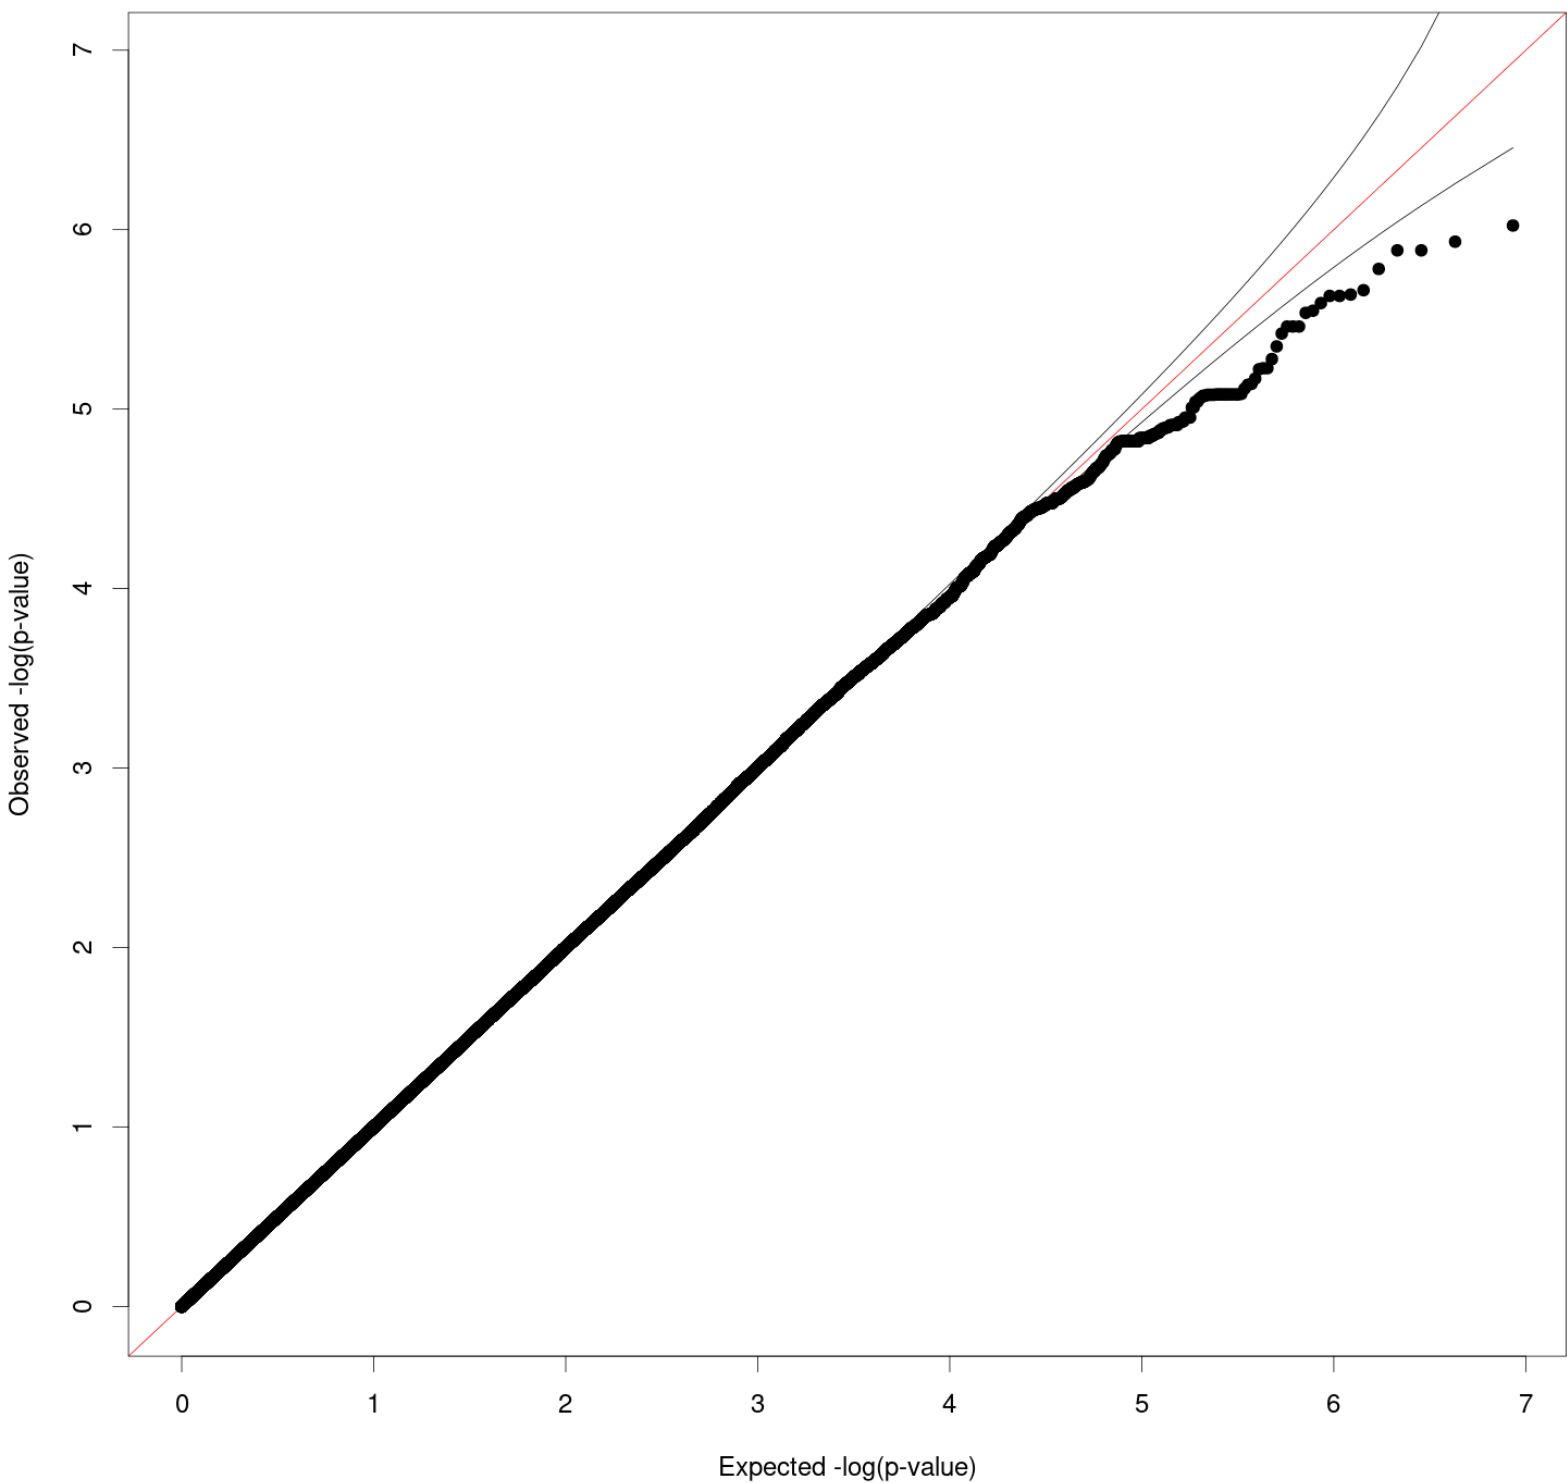

QQ plot for mz145.0618\_t22.9, glutamine  
inflation factor = 0.9984

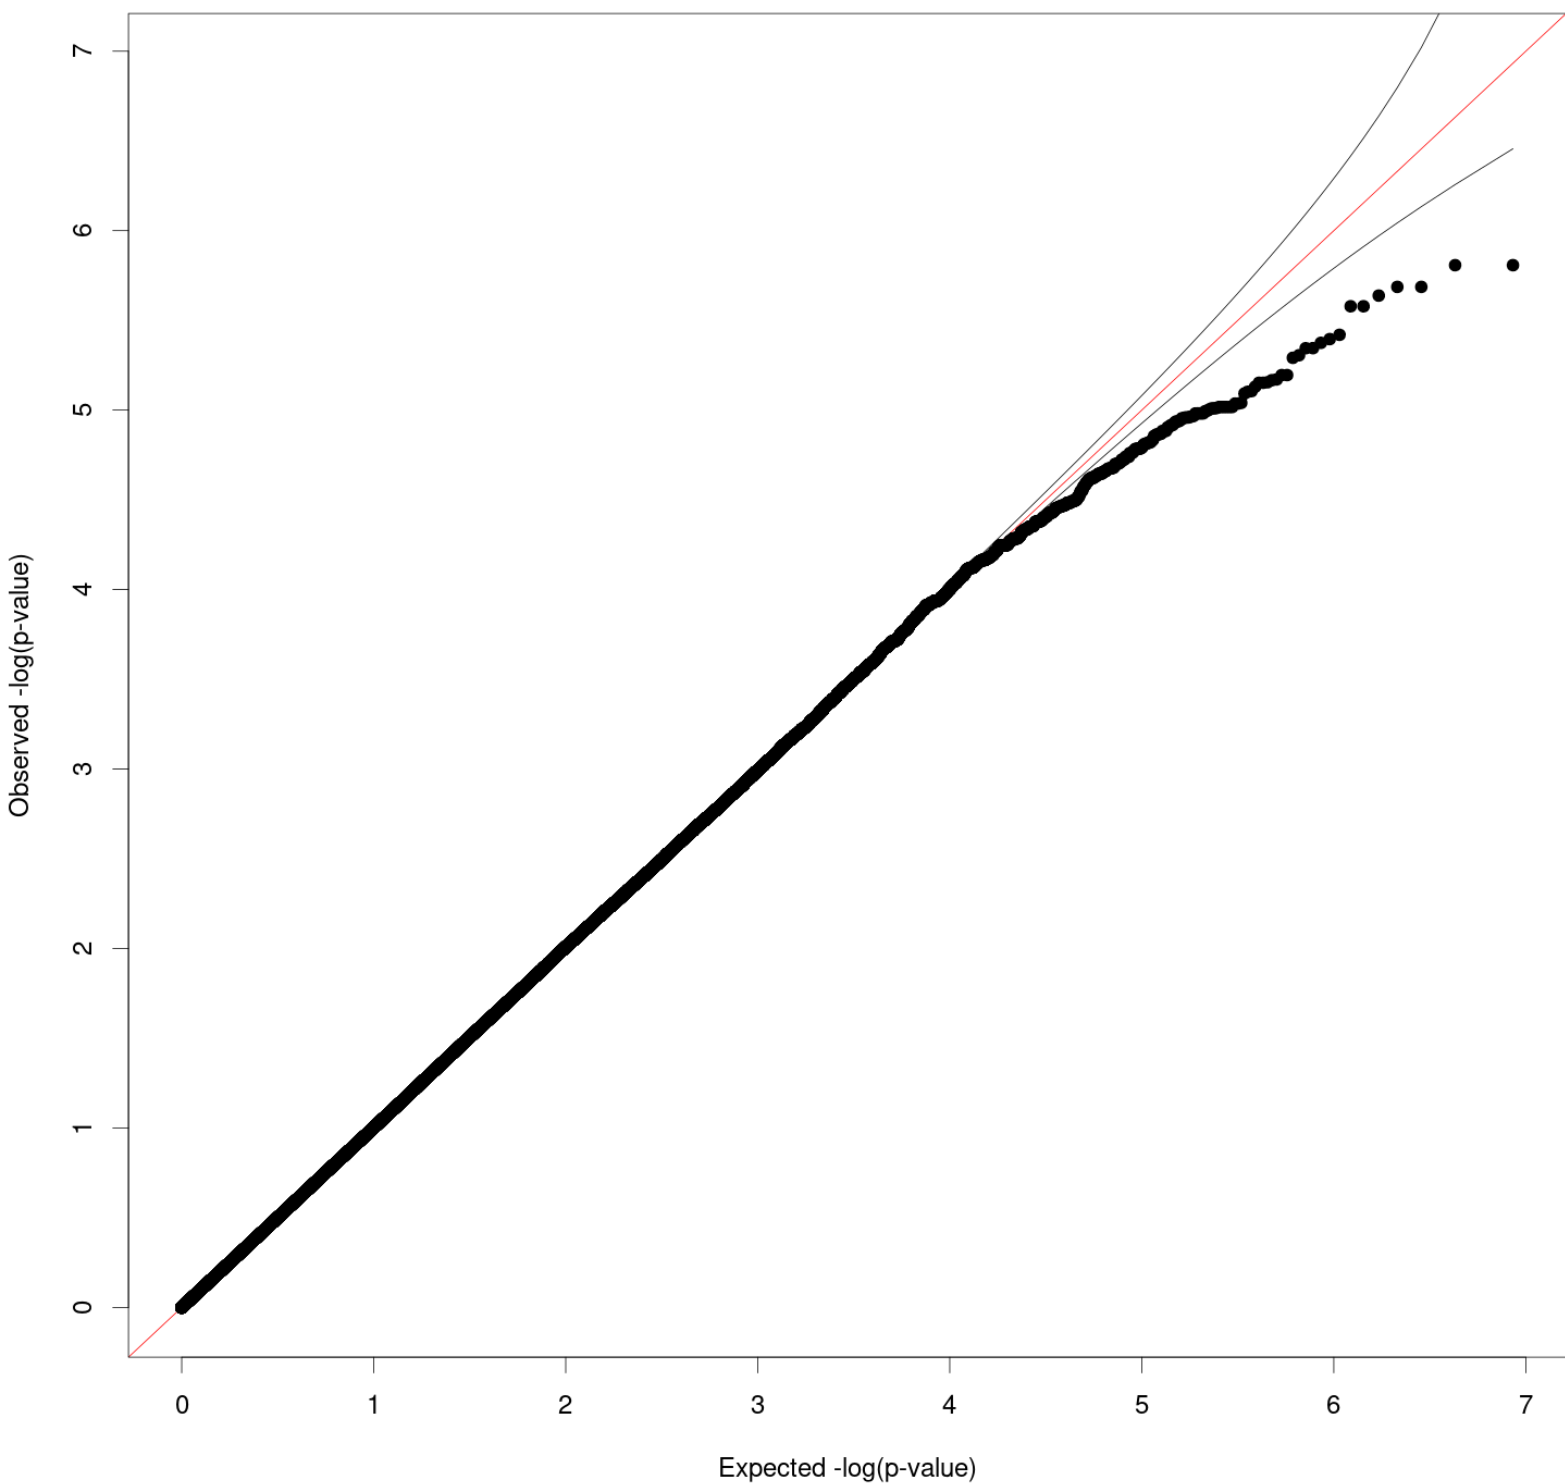

QQ plot for mz145.0982\_t37, lysine  
inflation factor = 0.9995

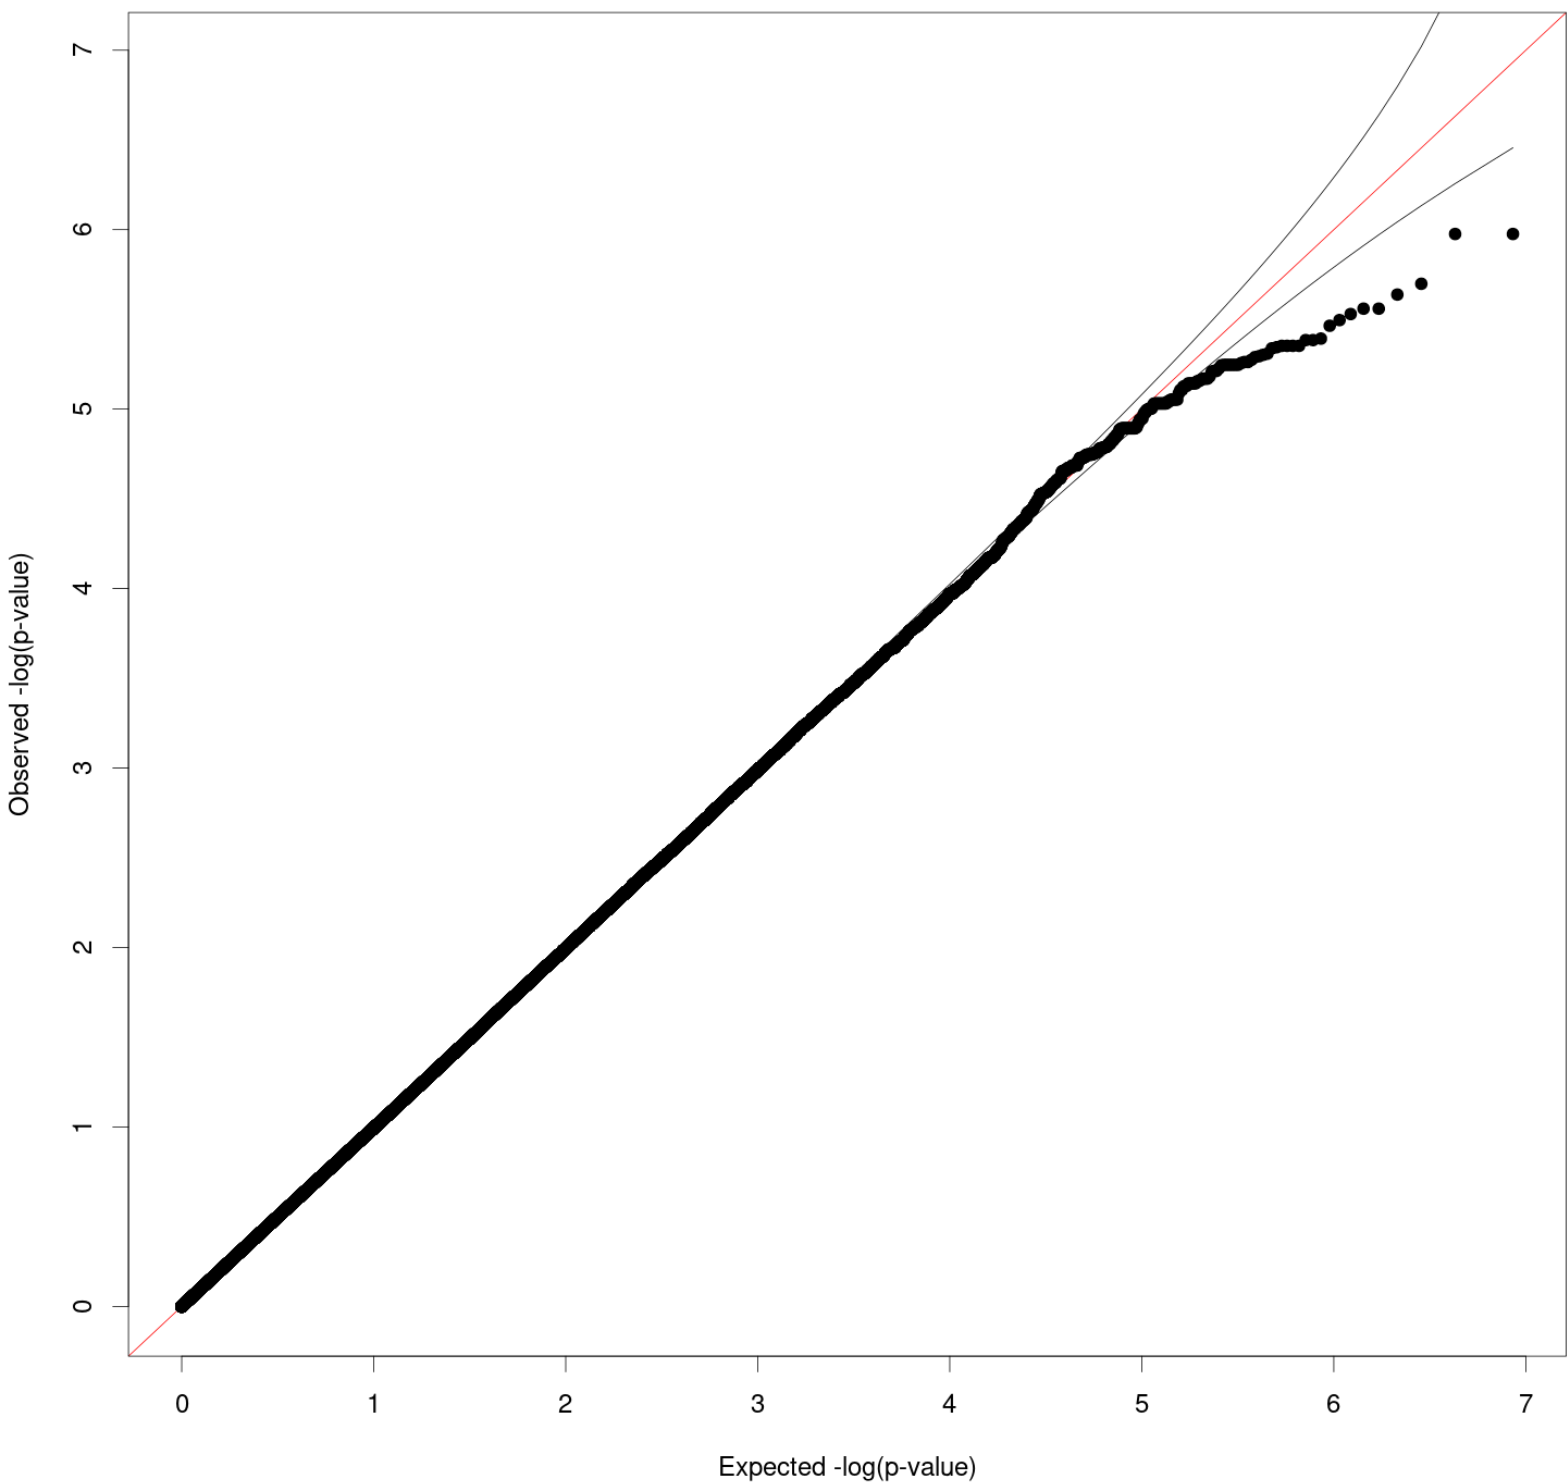



QQ plot for mz147.045\_t46.9, trans-cinnamate  
inflation factor = 0.9929

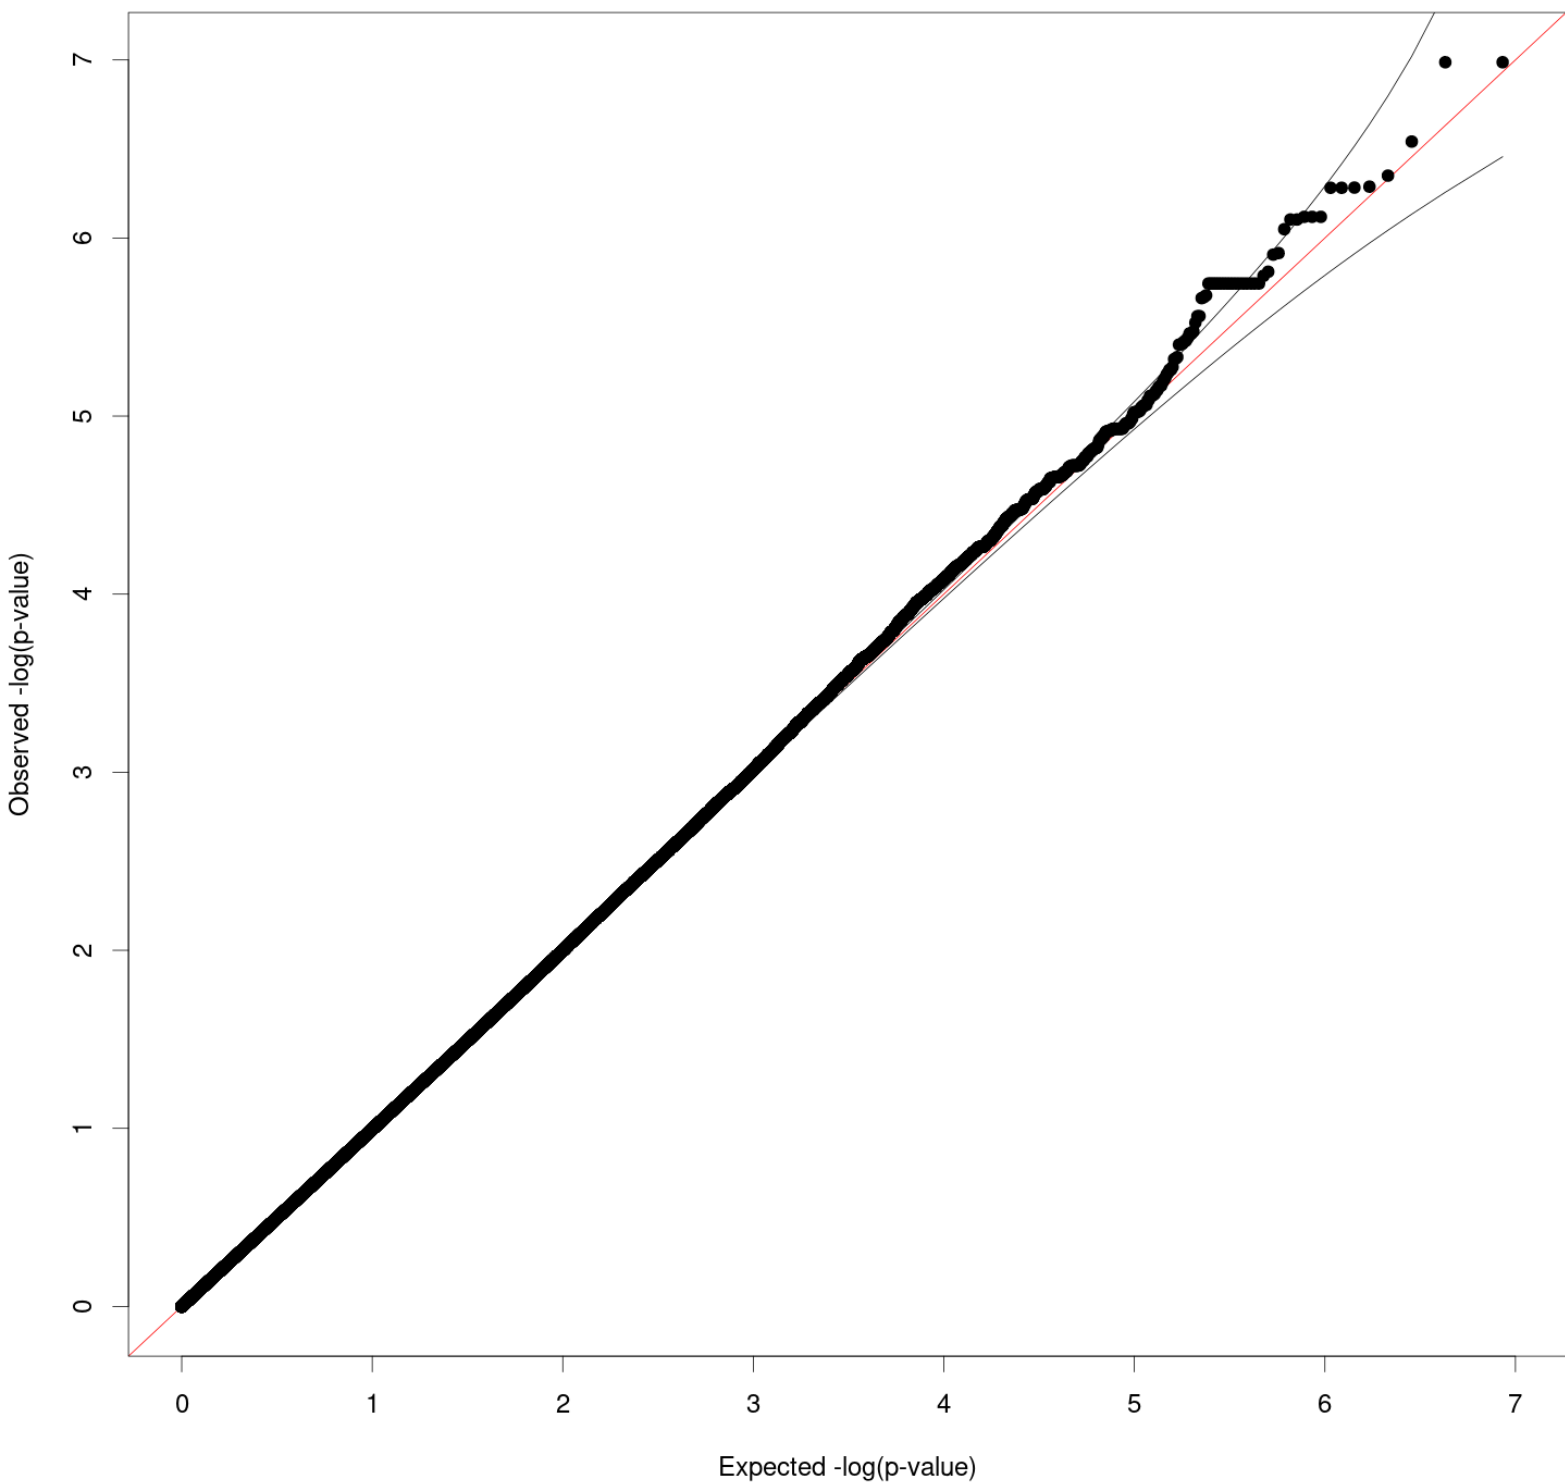

QQ plot for mz147.0298\_t23.1, citramalate  
inflation factor = 0.9947

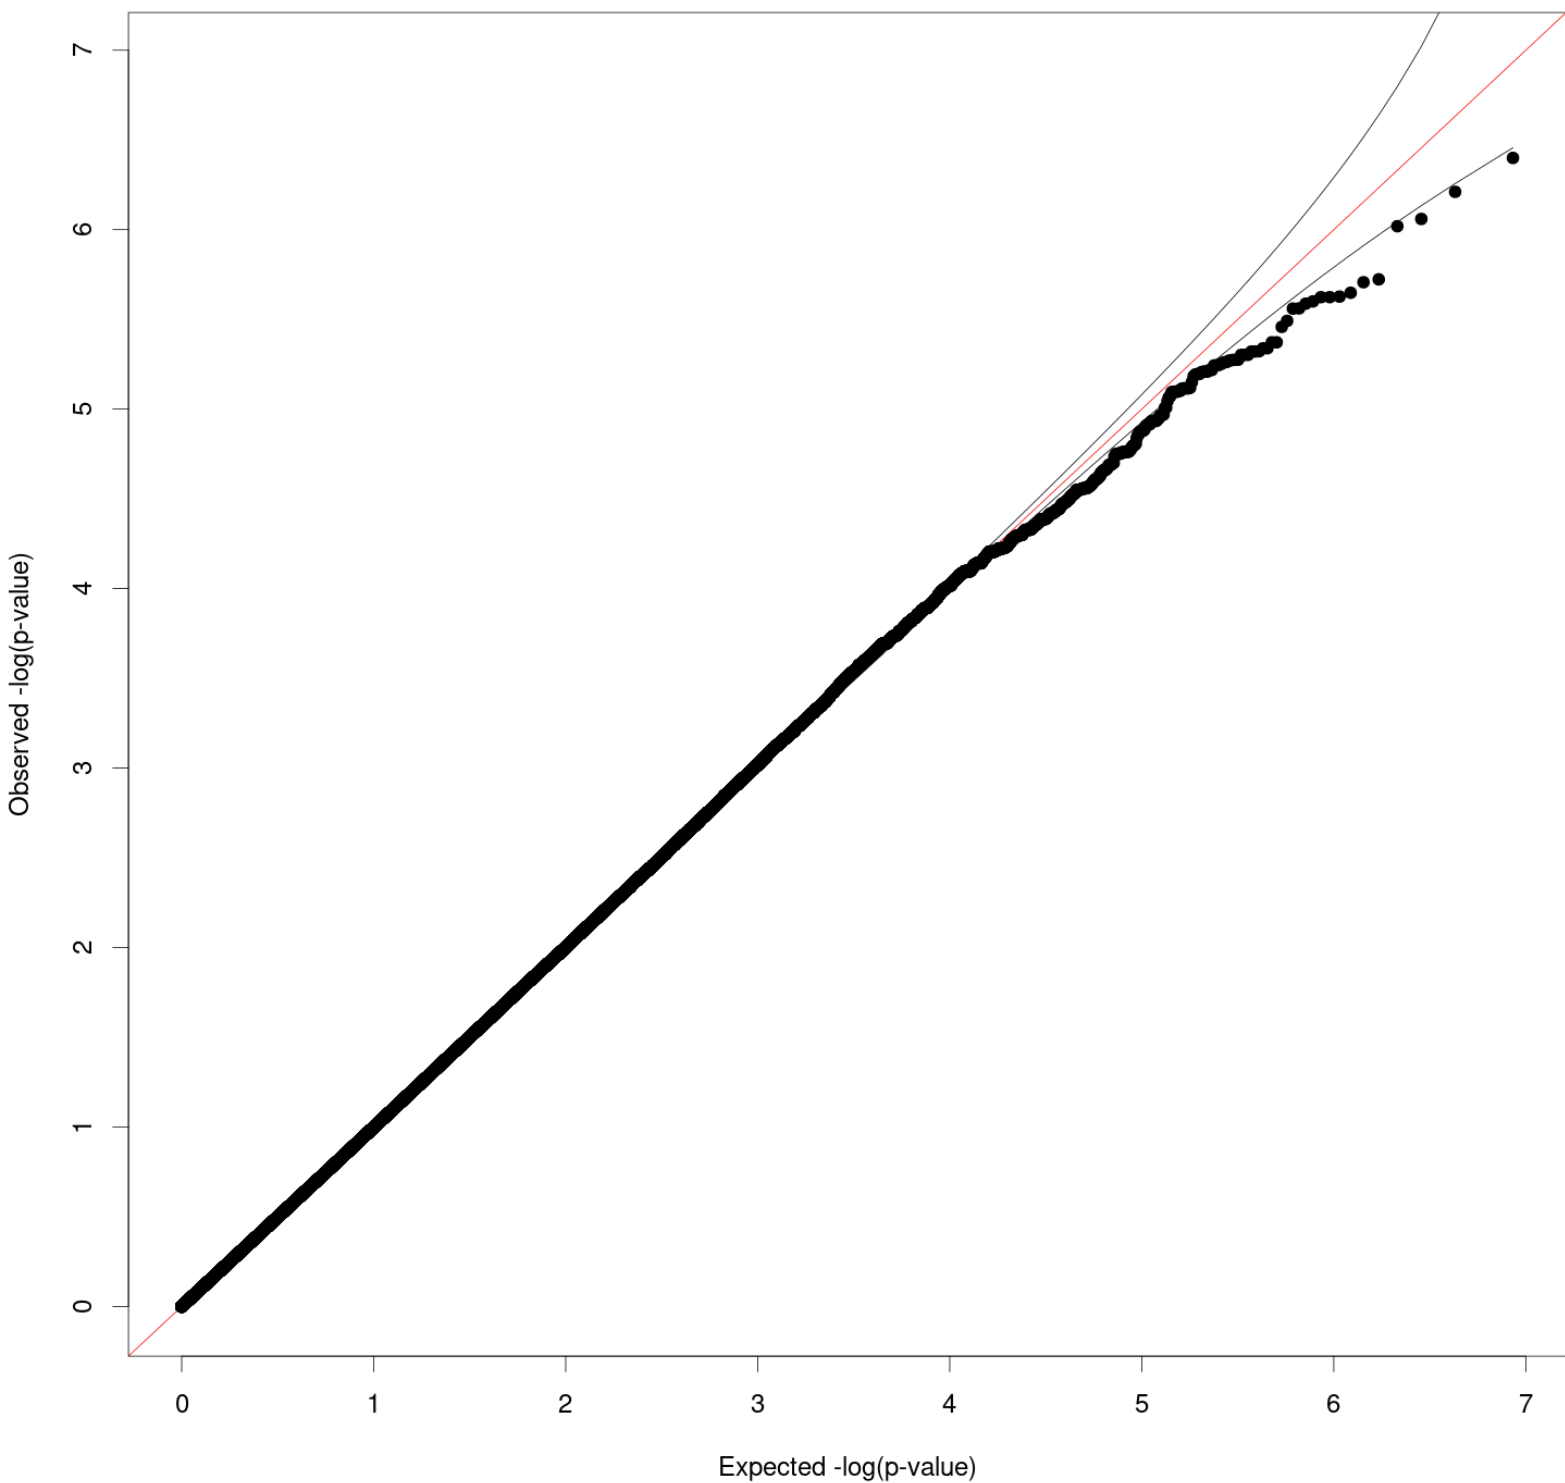

QQ plot for mz147.0661\_t24.1, (rs)-mevalonic acid lithium salt  
inflation factor = 1.007

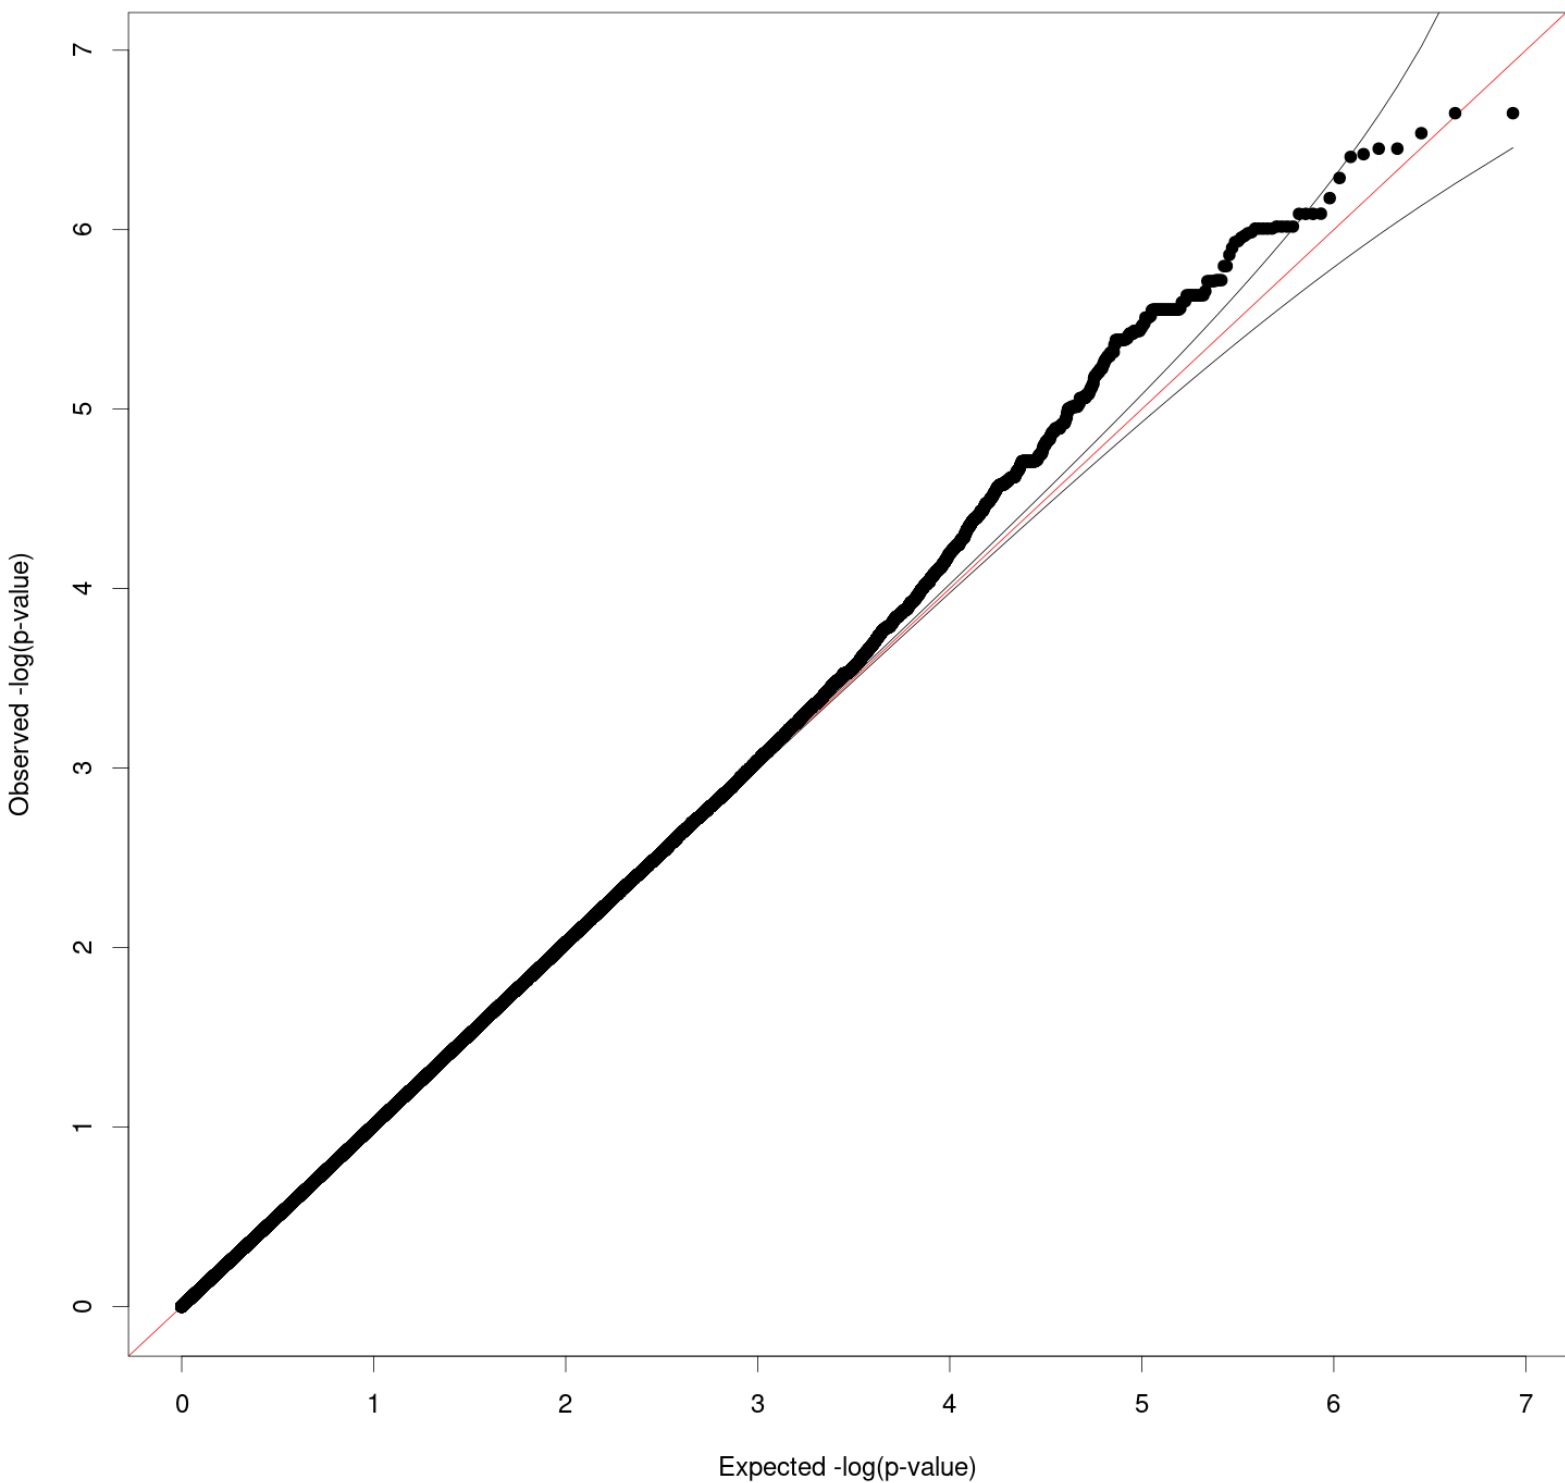

QQ plot for mz147.0764\_t81.7, glutamine  
inflation factor = 0.9966

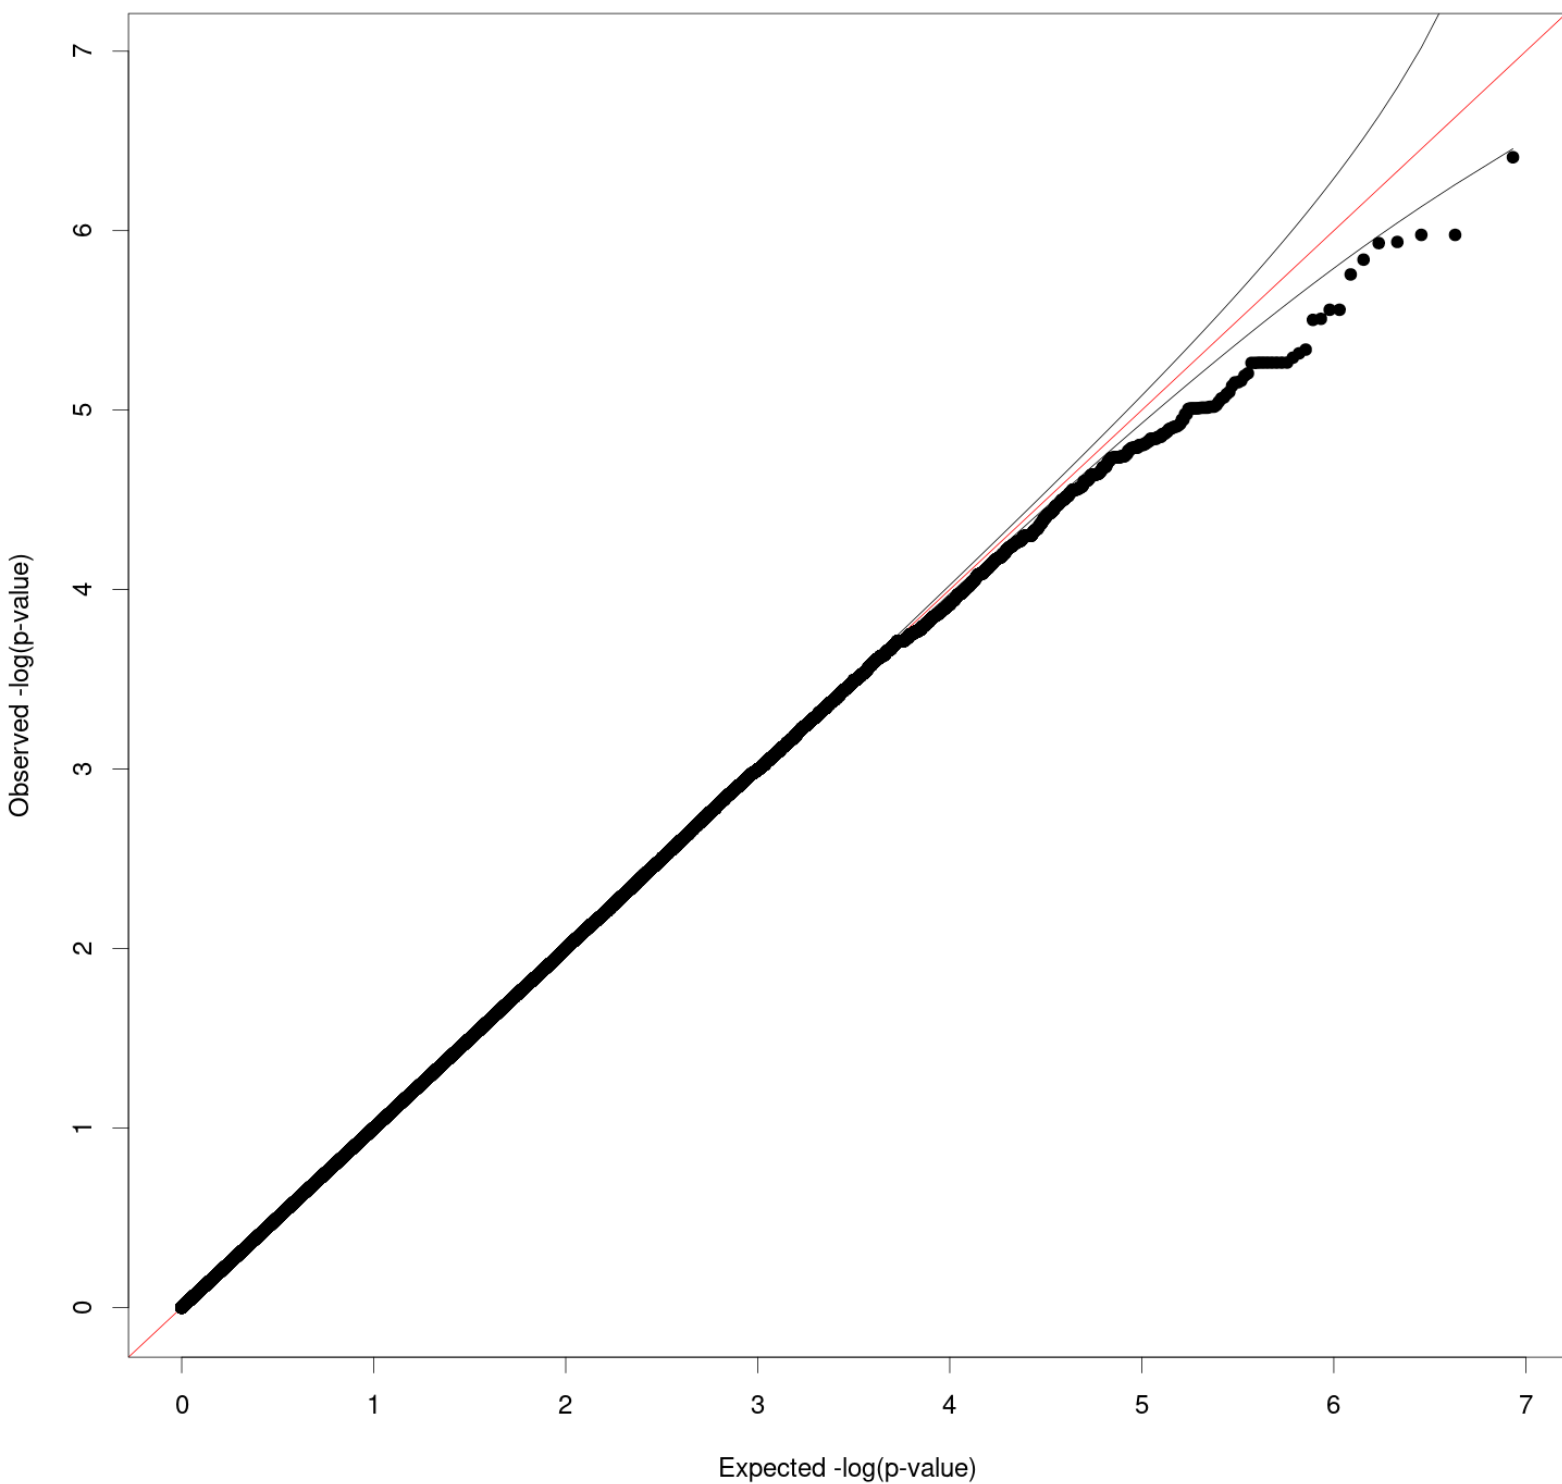

QQ plot for mz148.0437\_t35.7, methionine  
inflation factor = 0.9876

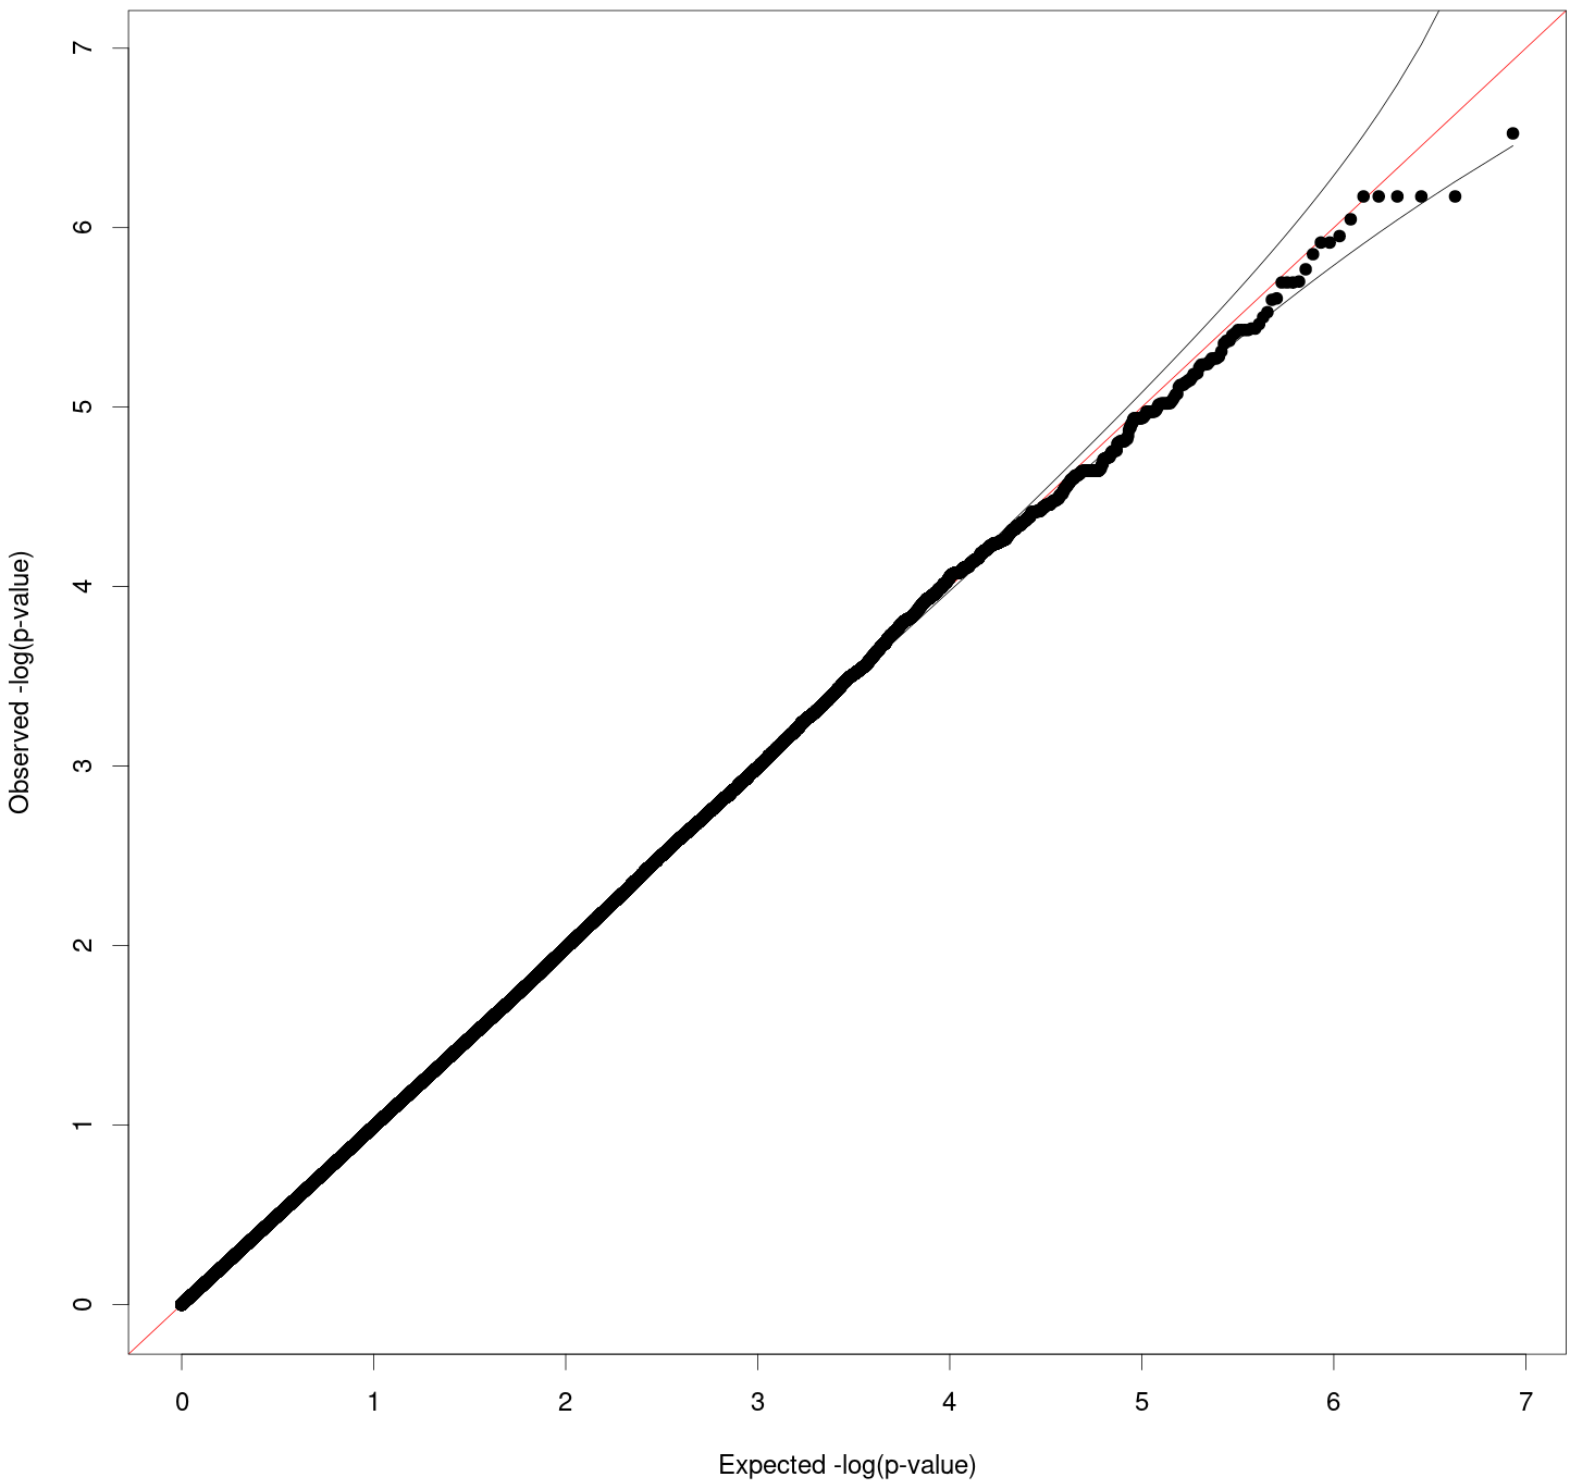

QQ plot for mz148.0757\_t44.7, 3-methyl-2-oxindole  
inflation factor = 1.005

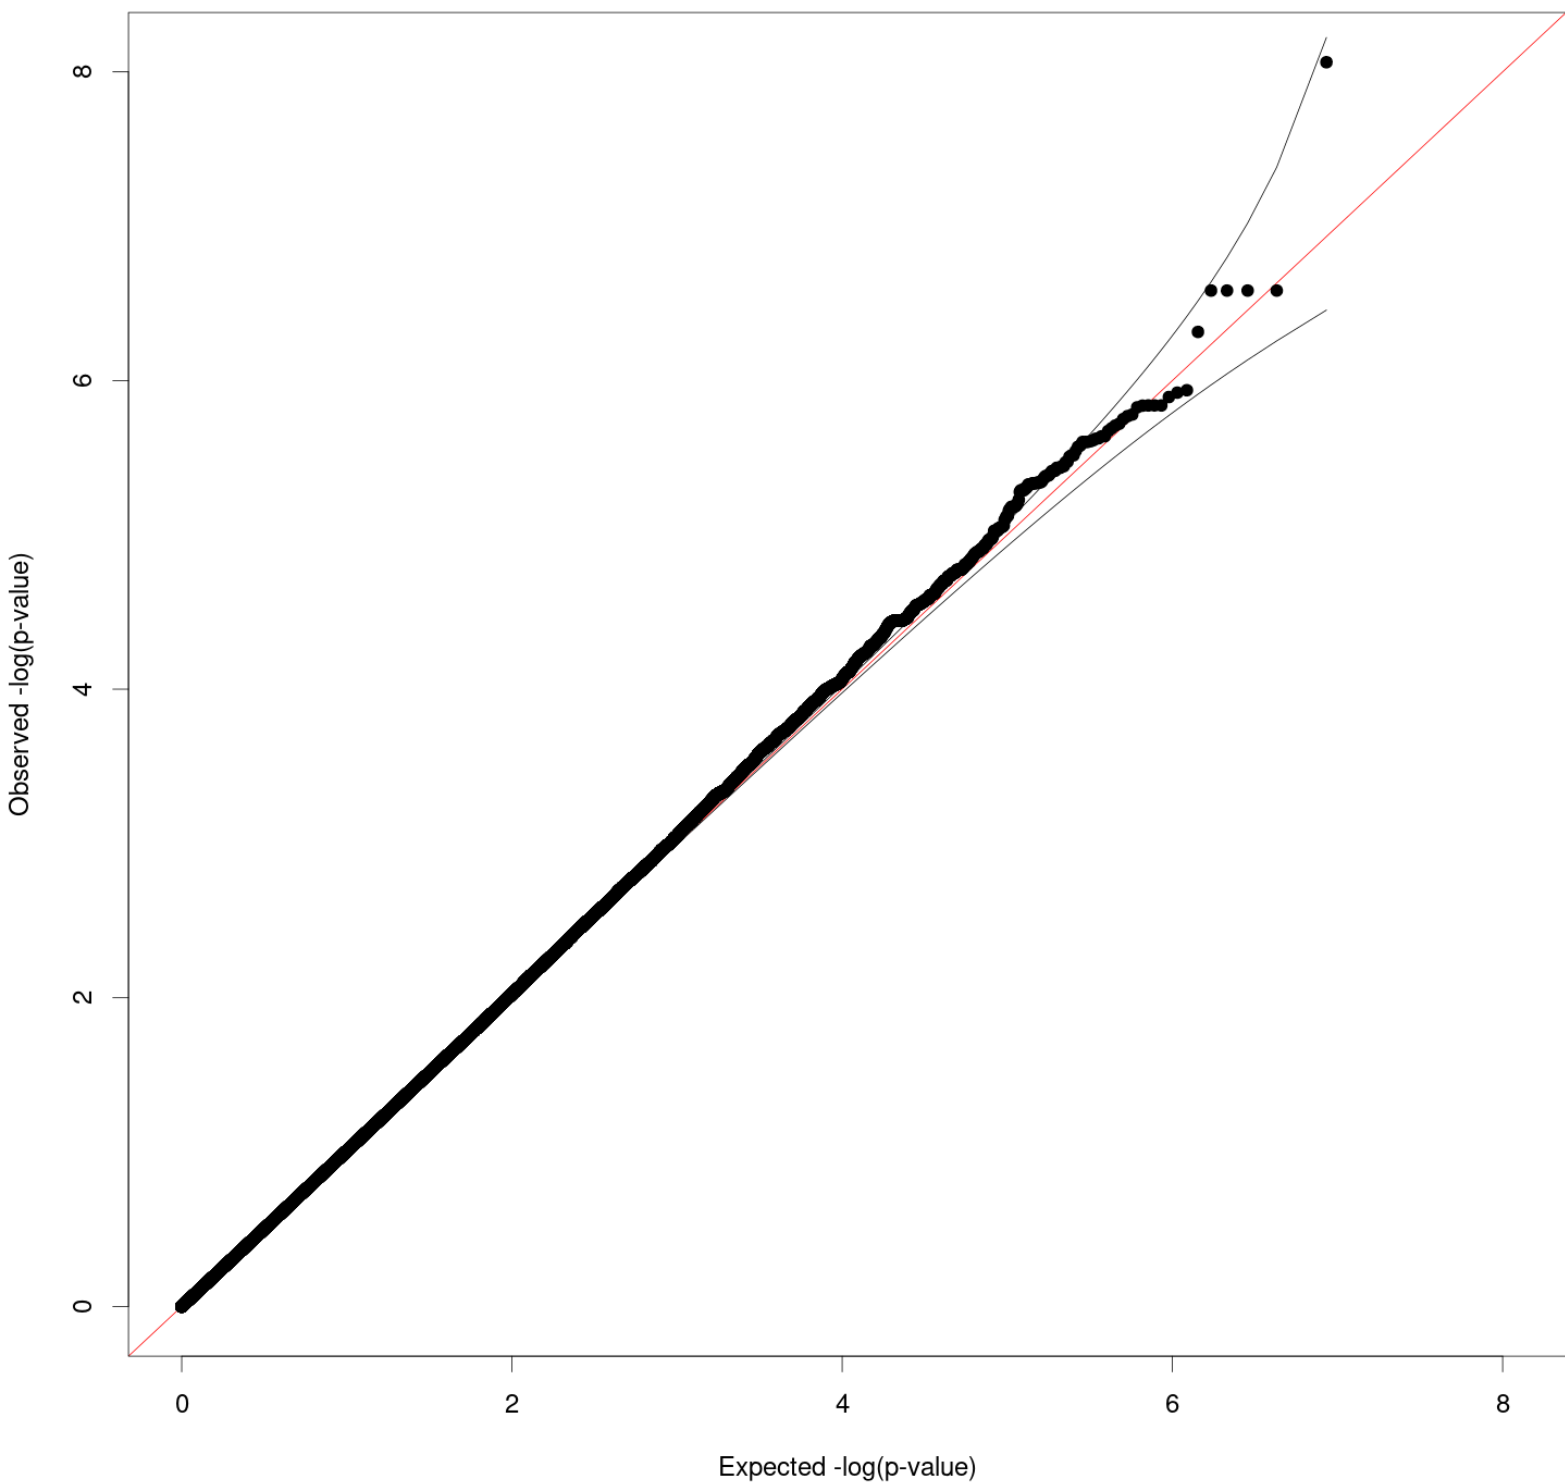

QQ plot for mz149.0278\_t28.8, 2-hydroxy-4-(methylthio)butyric acid  
inflation factor = 1.023

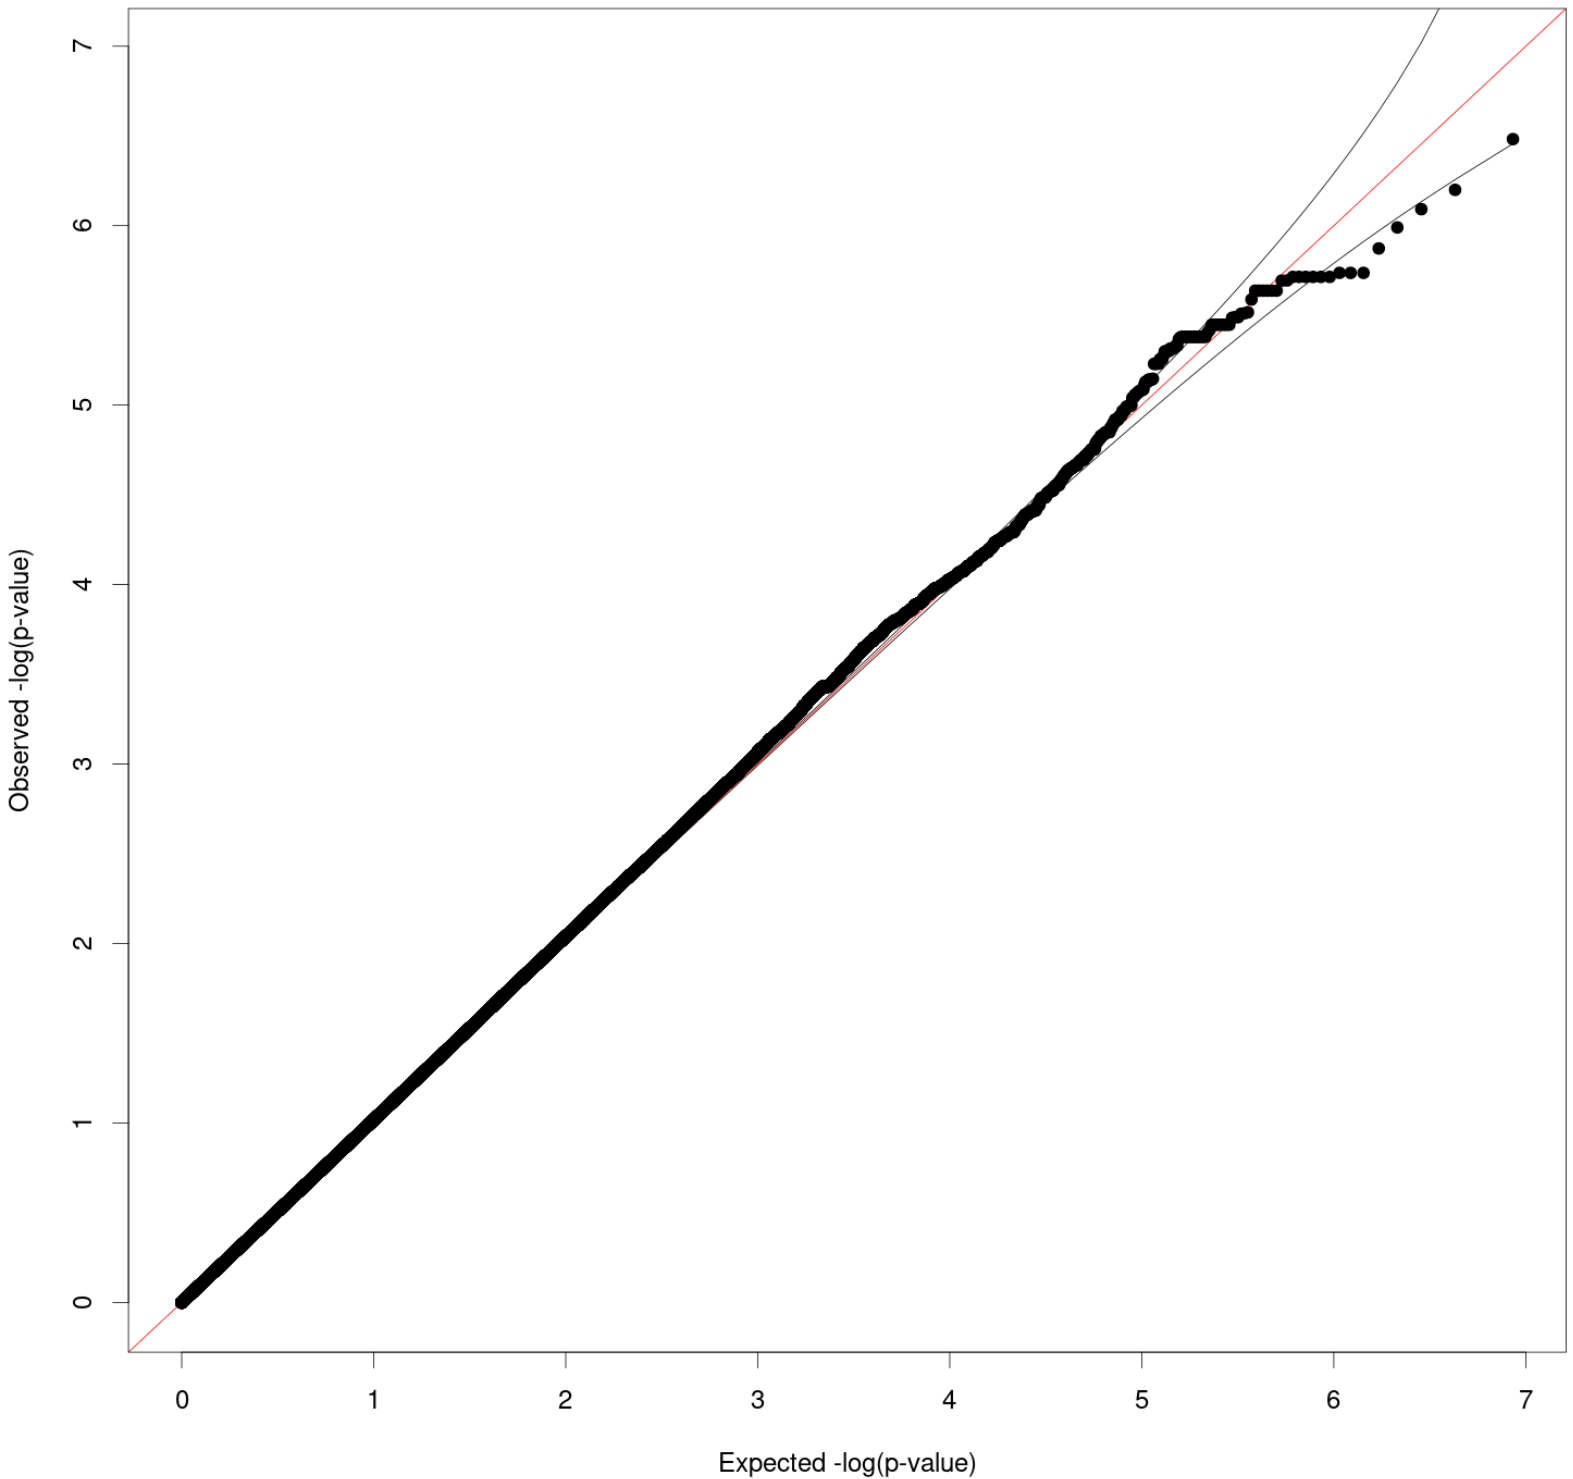

QQ plot for mz150.0583\_t52.3, methionine  
inflation factor = 0.9982

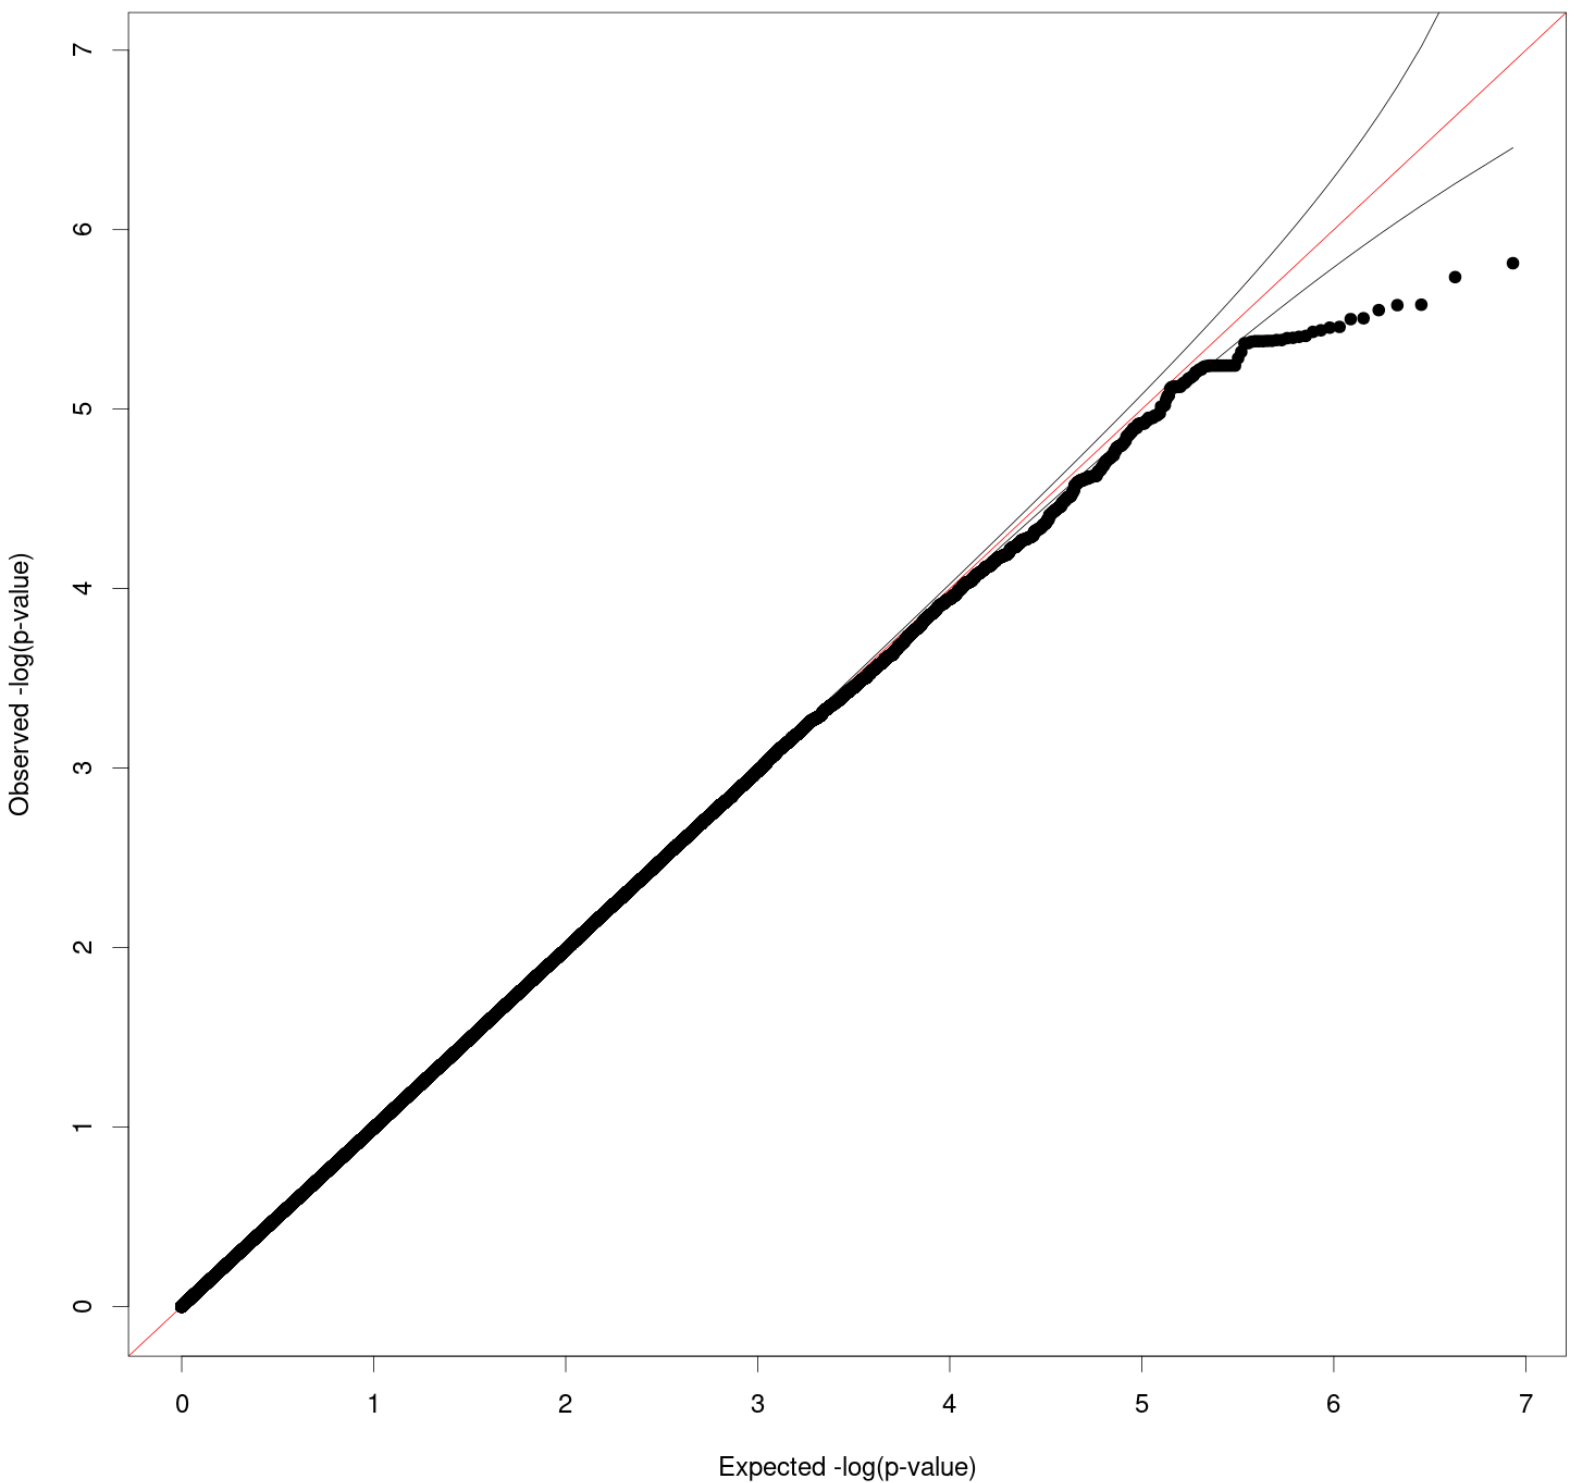



QQ plot for mz151.026\_t22.8, xanthine  
inflation factor = 0.9914

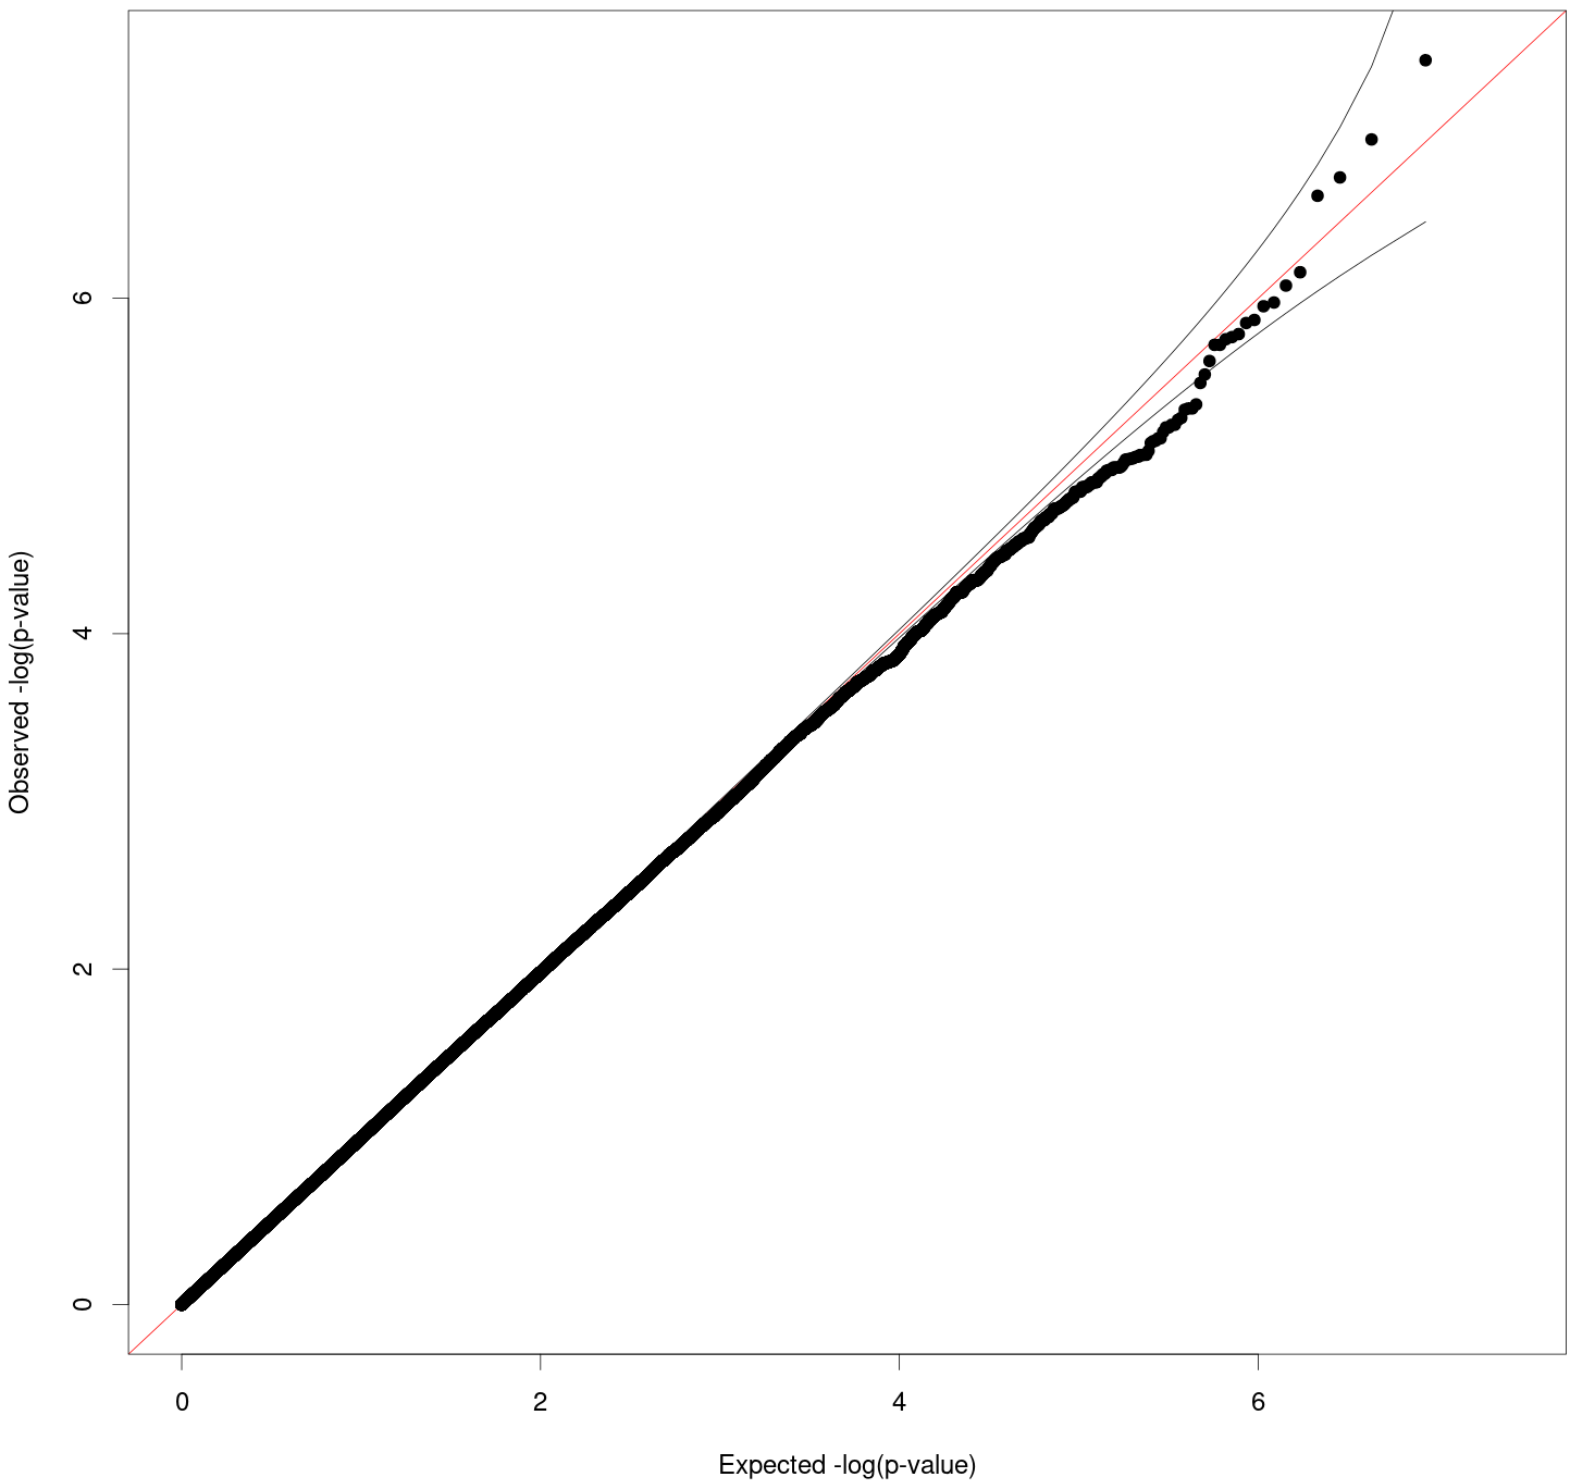

QQ plot for mz153.0407\_t42, xanthine  
inflation factor = 1.004

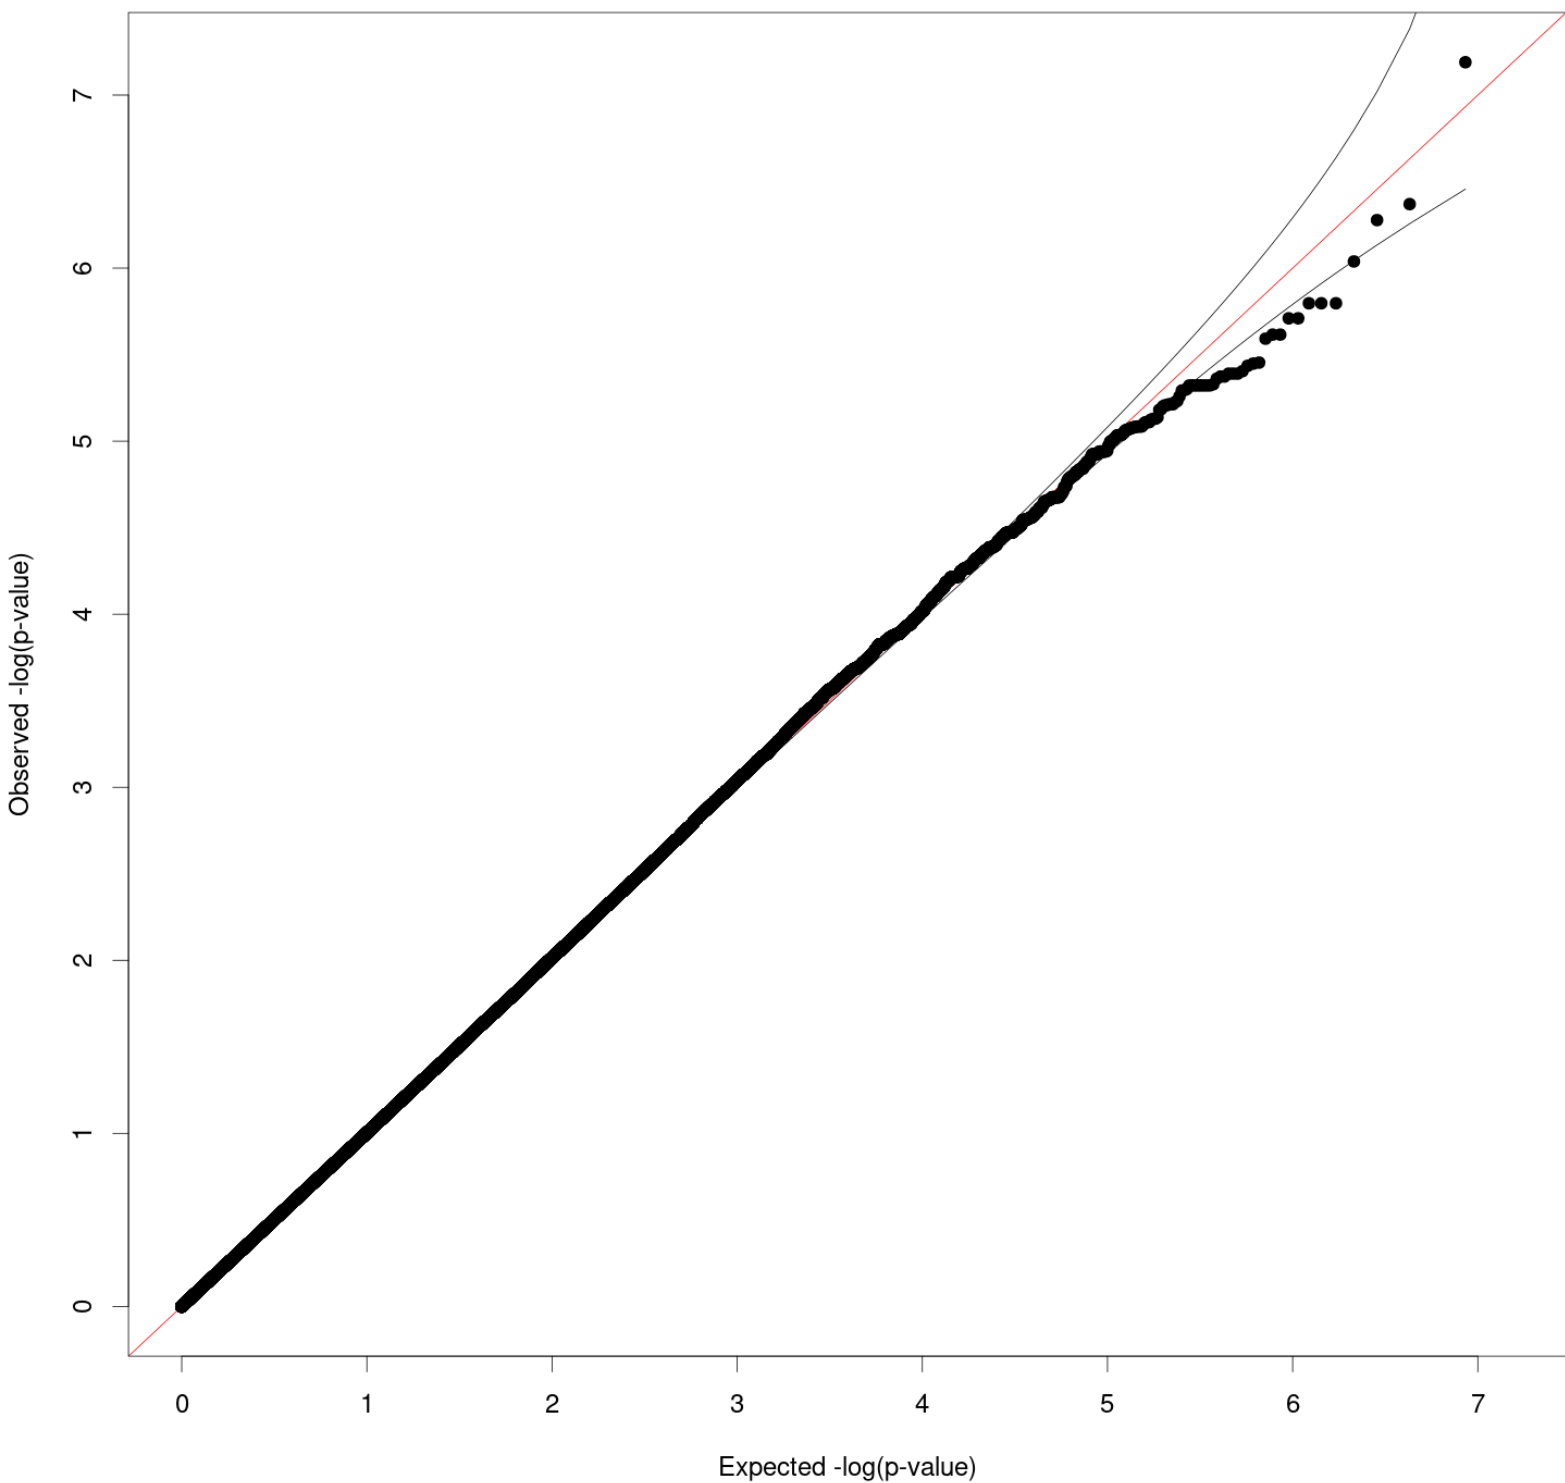

QQ plot for mz153.0772\_t51.3, arabitol  
inflation factor = 1.001

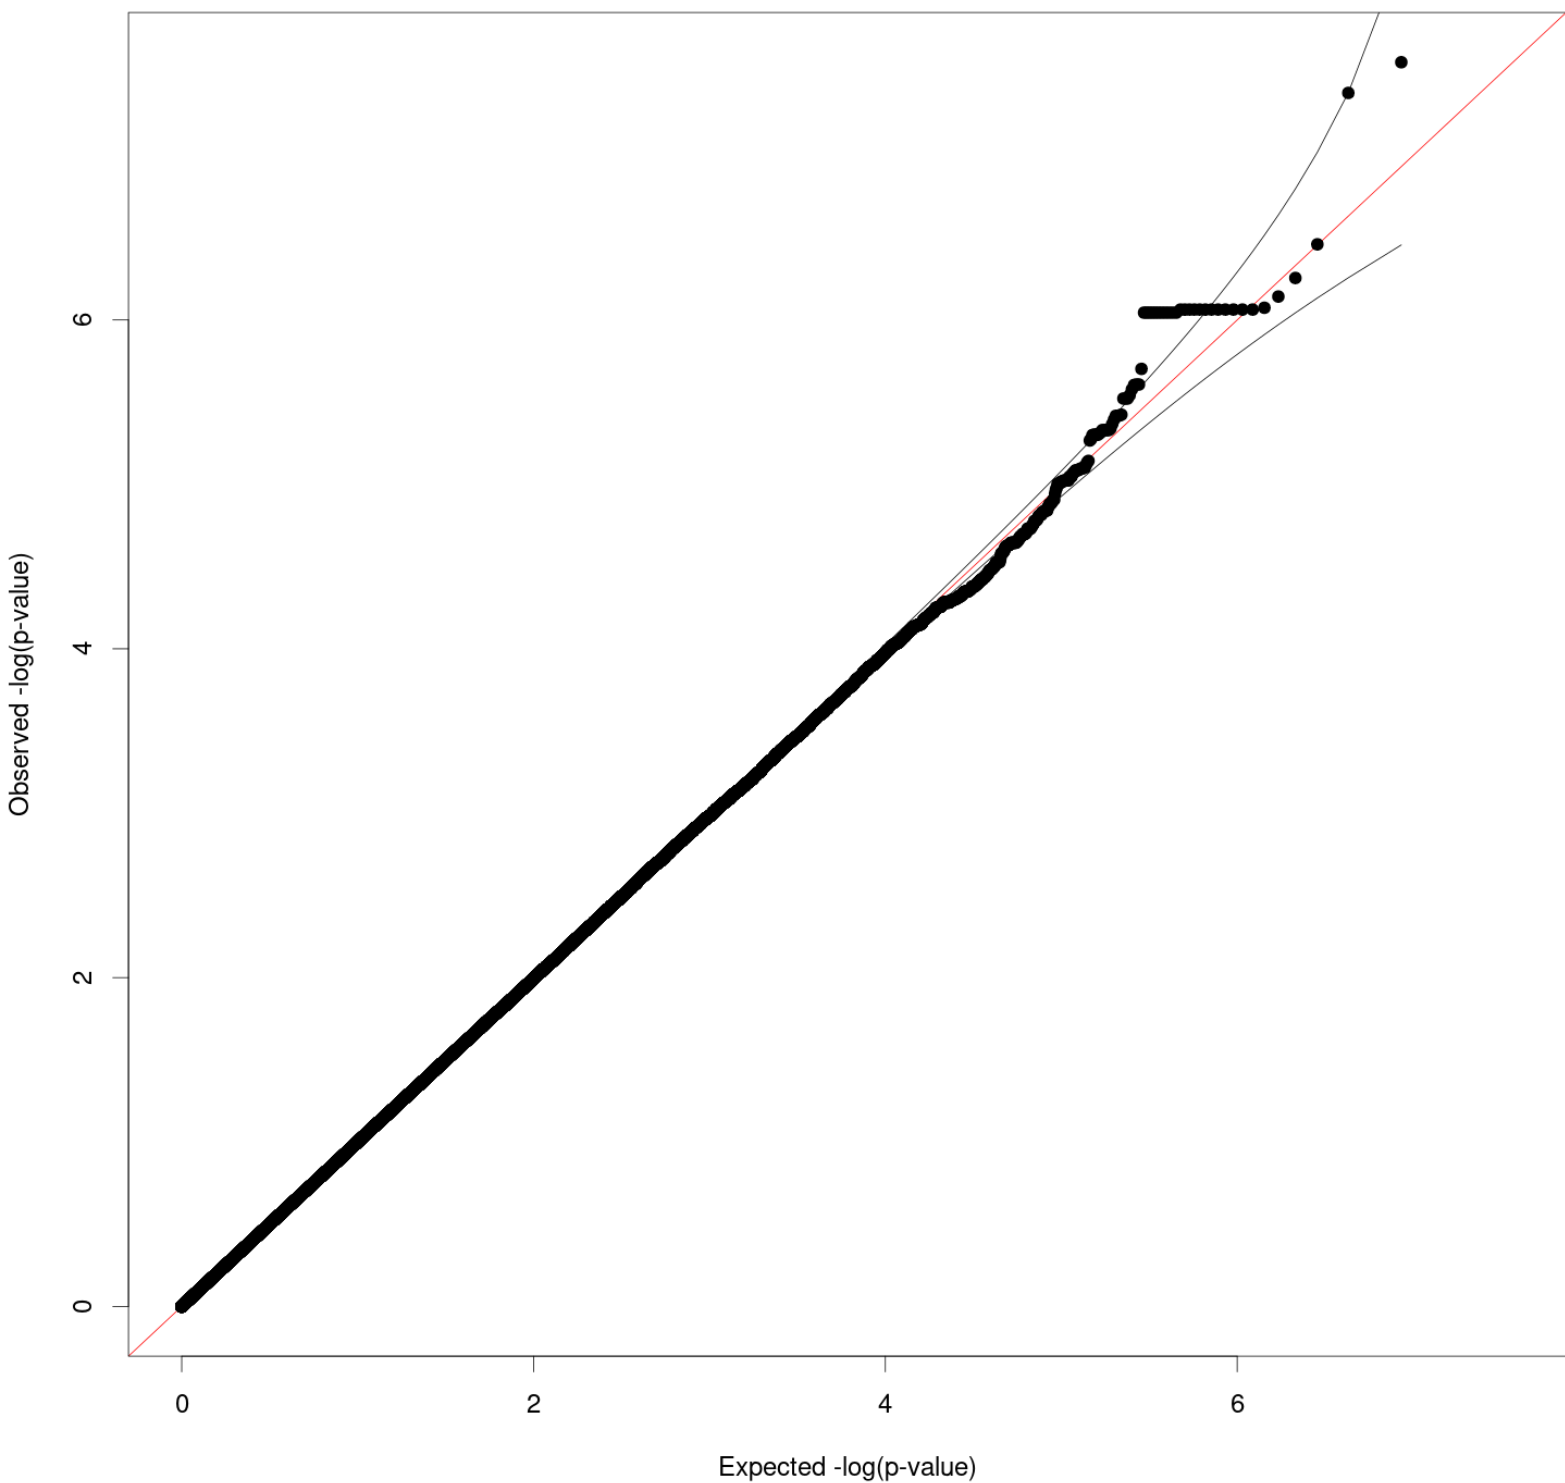

QQ plot for mz154.0621\_t21.1, histidine  
inflation factor = 1.007

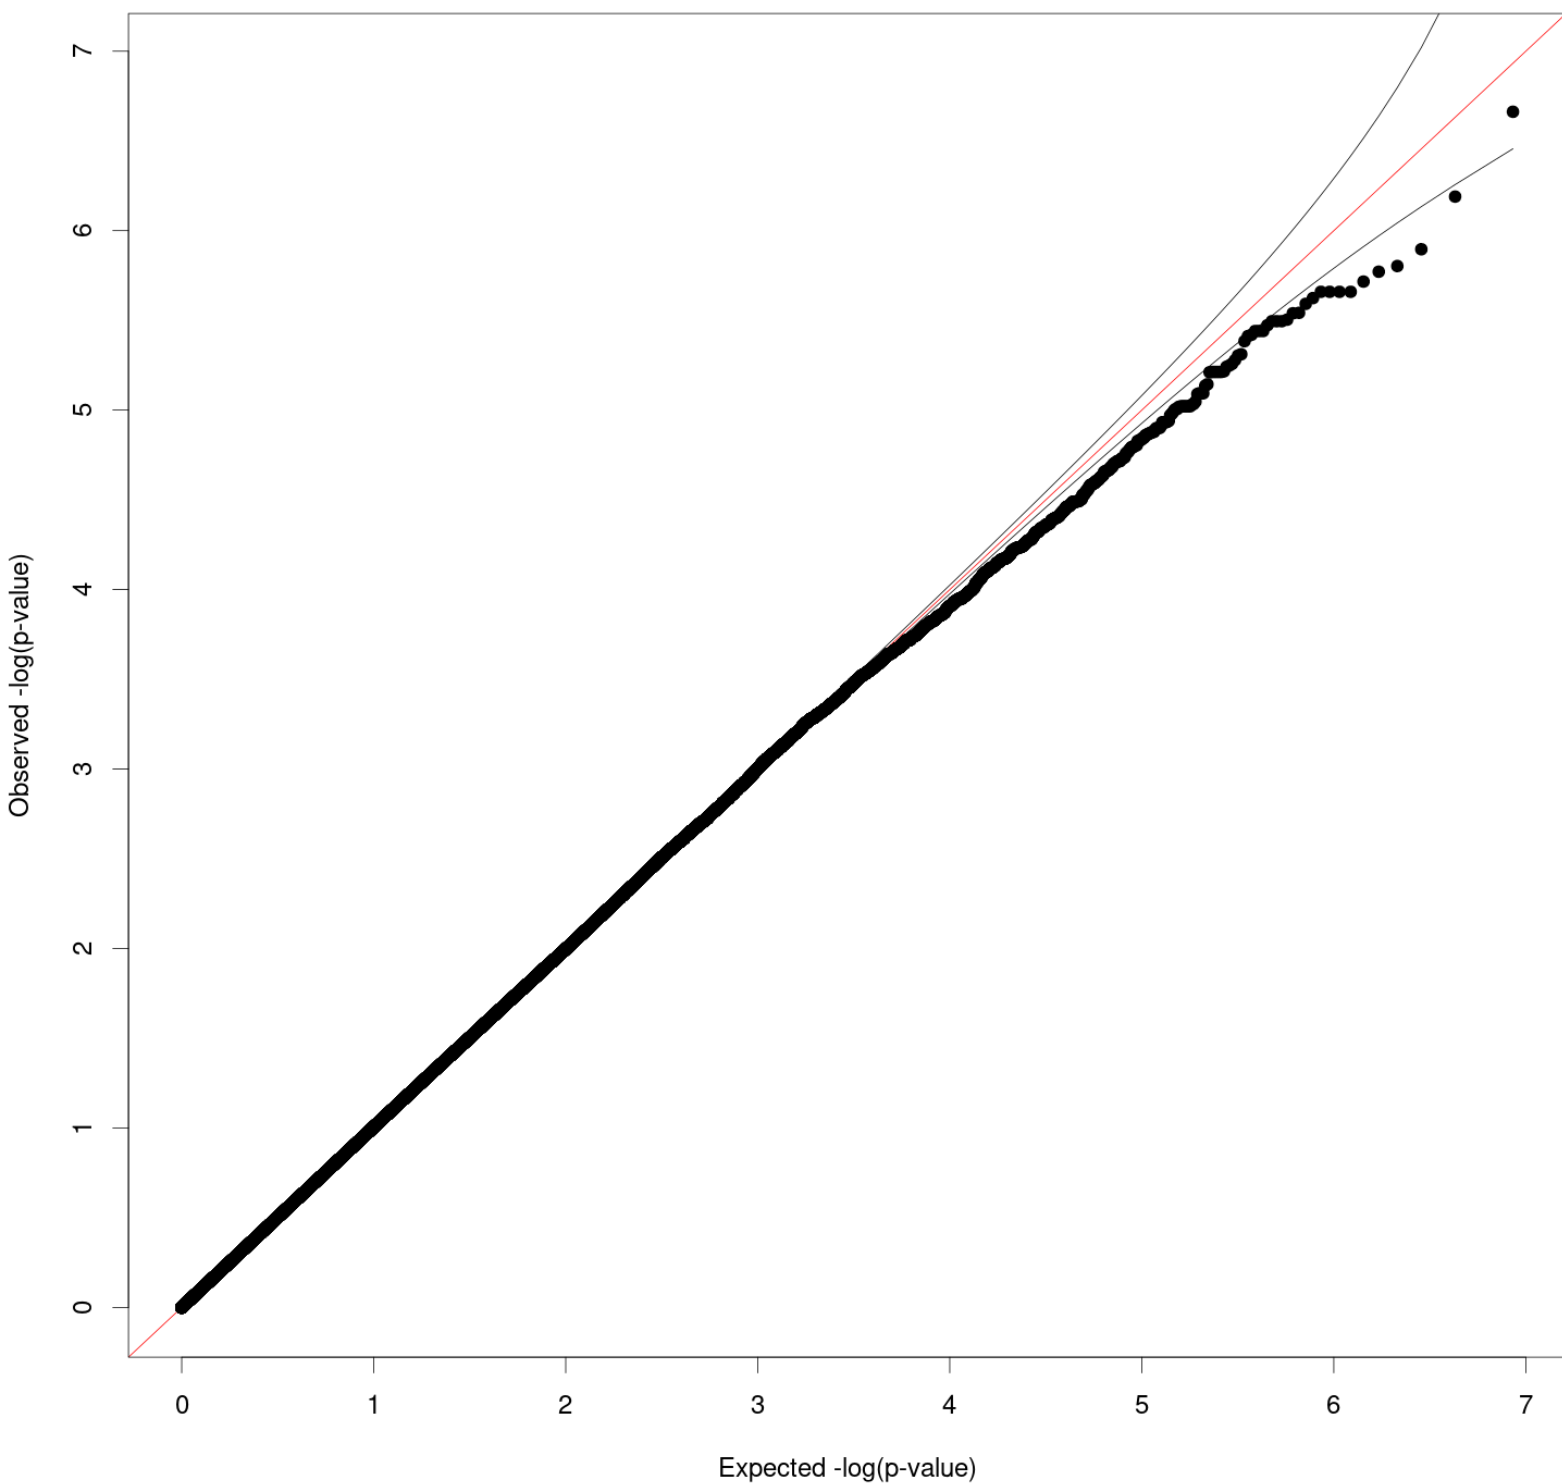

QQ plot for mz156.0767\_t105, histidine  
inflation factor = 0.9952

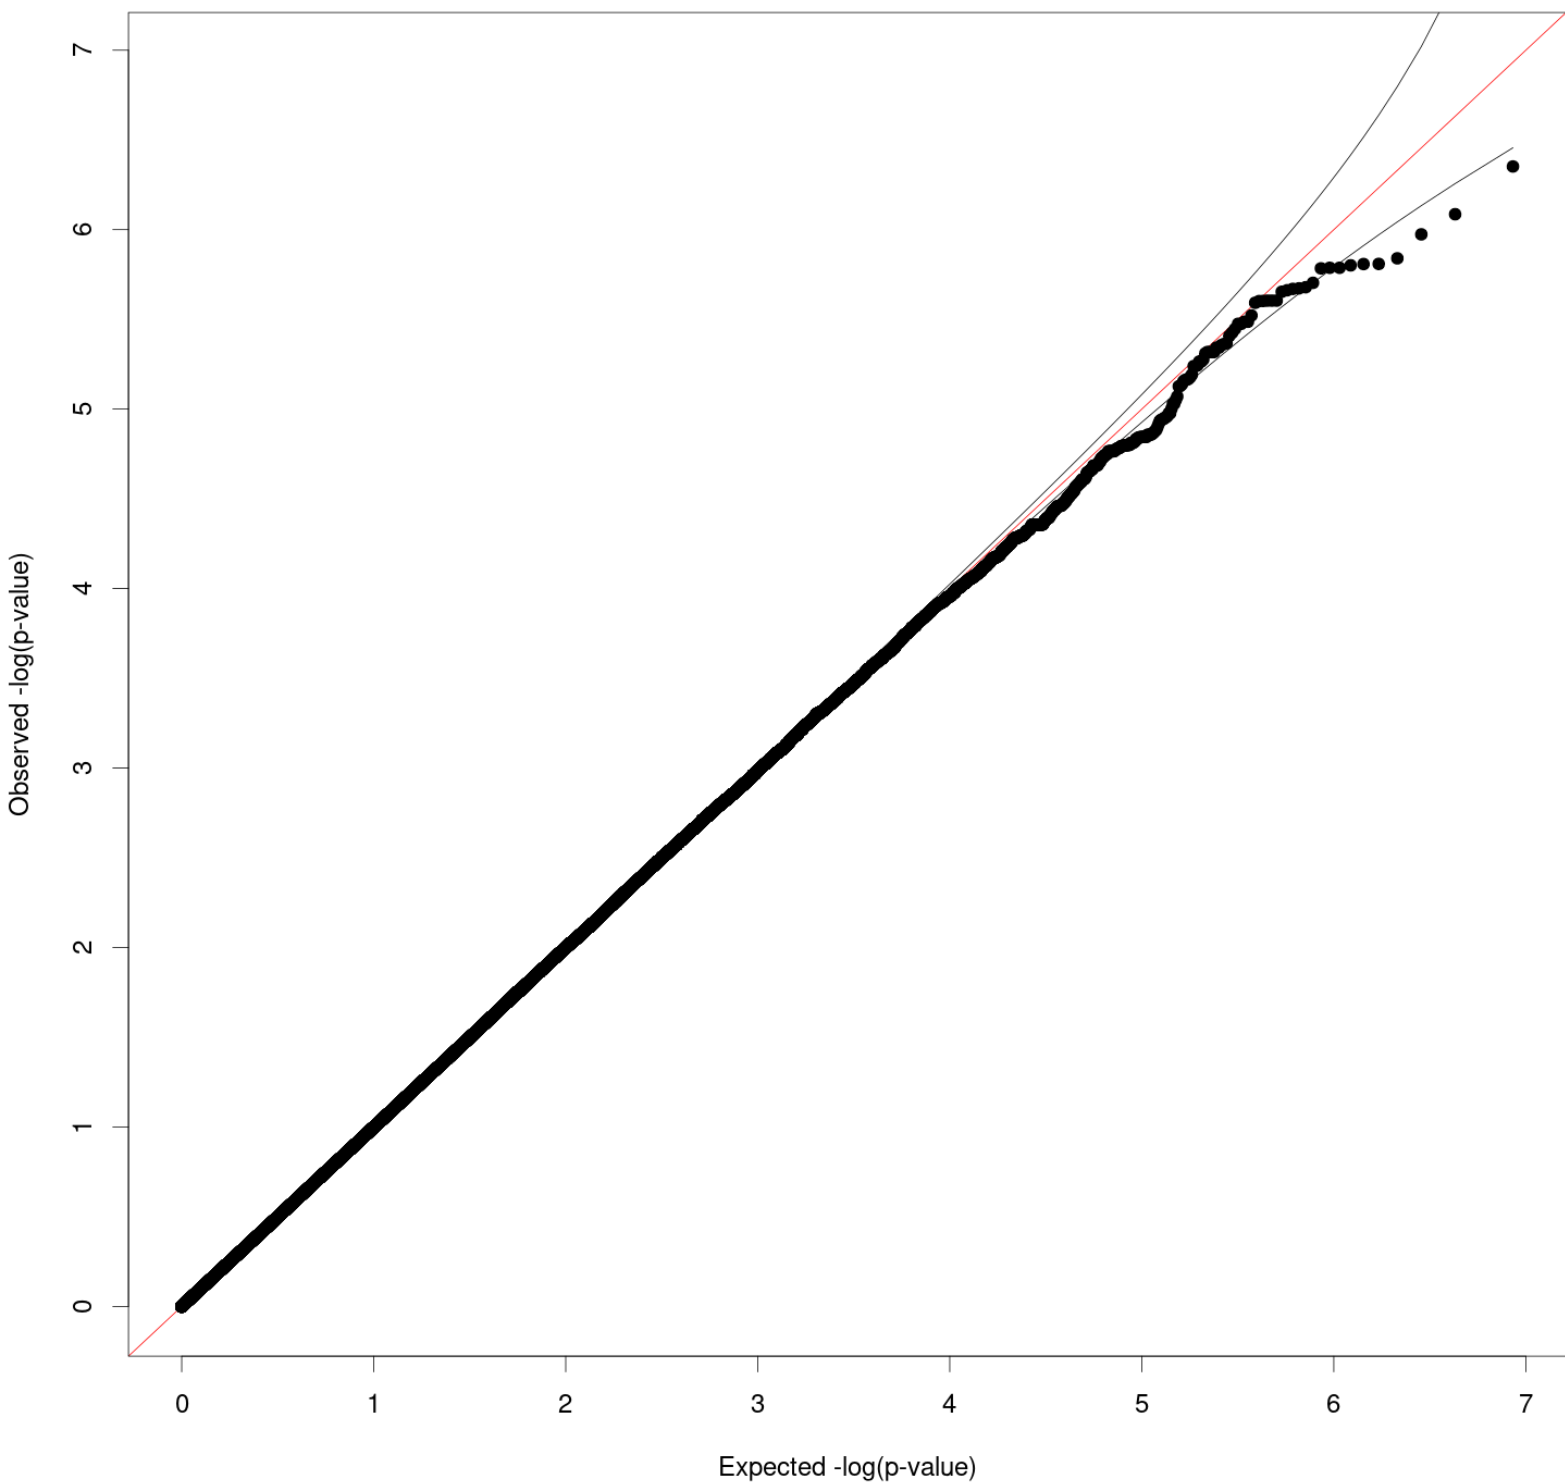

QQ plot for mz159.0515\_t42.1, allantoin  
inflation factor = 1.005

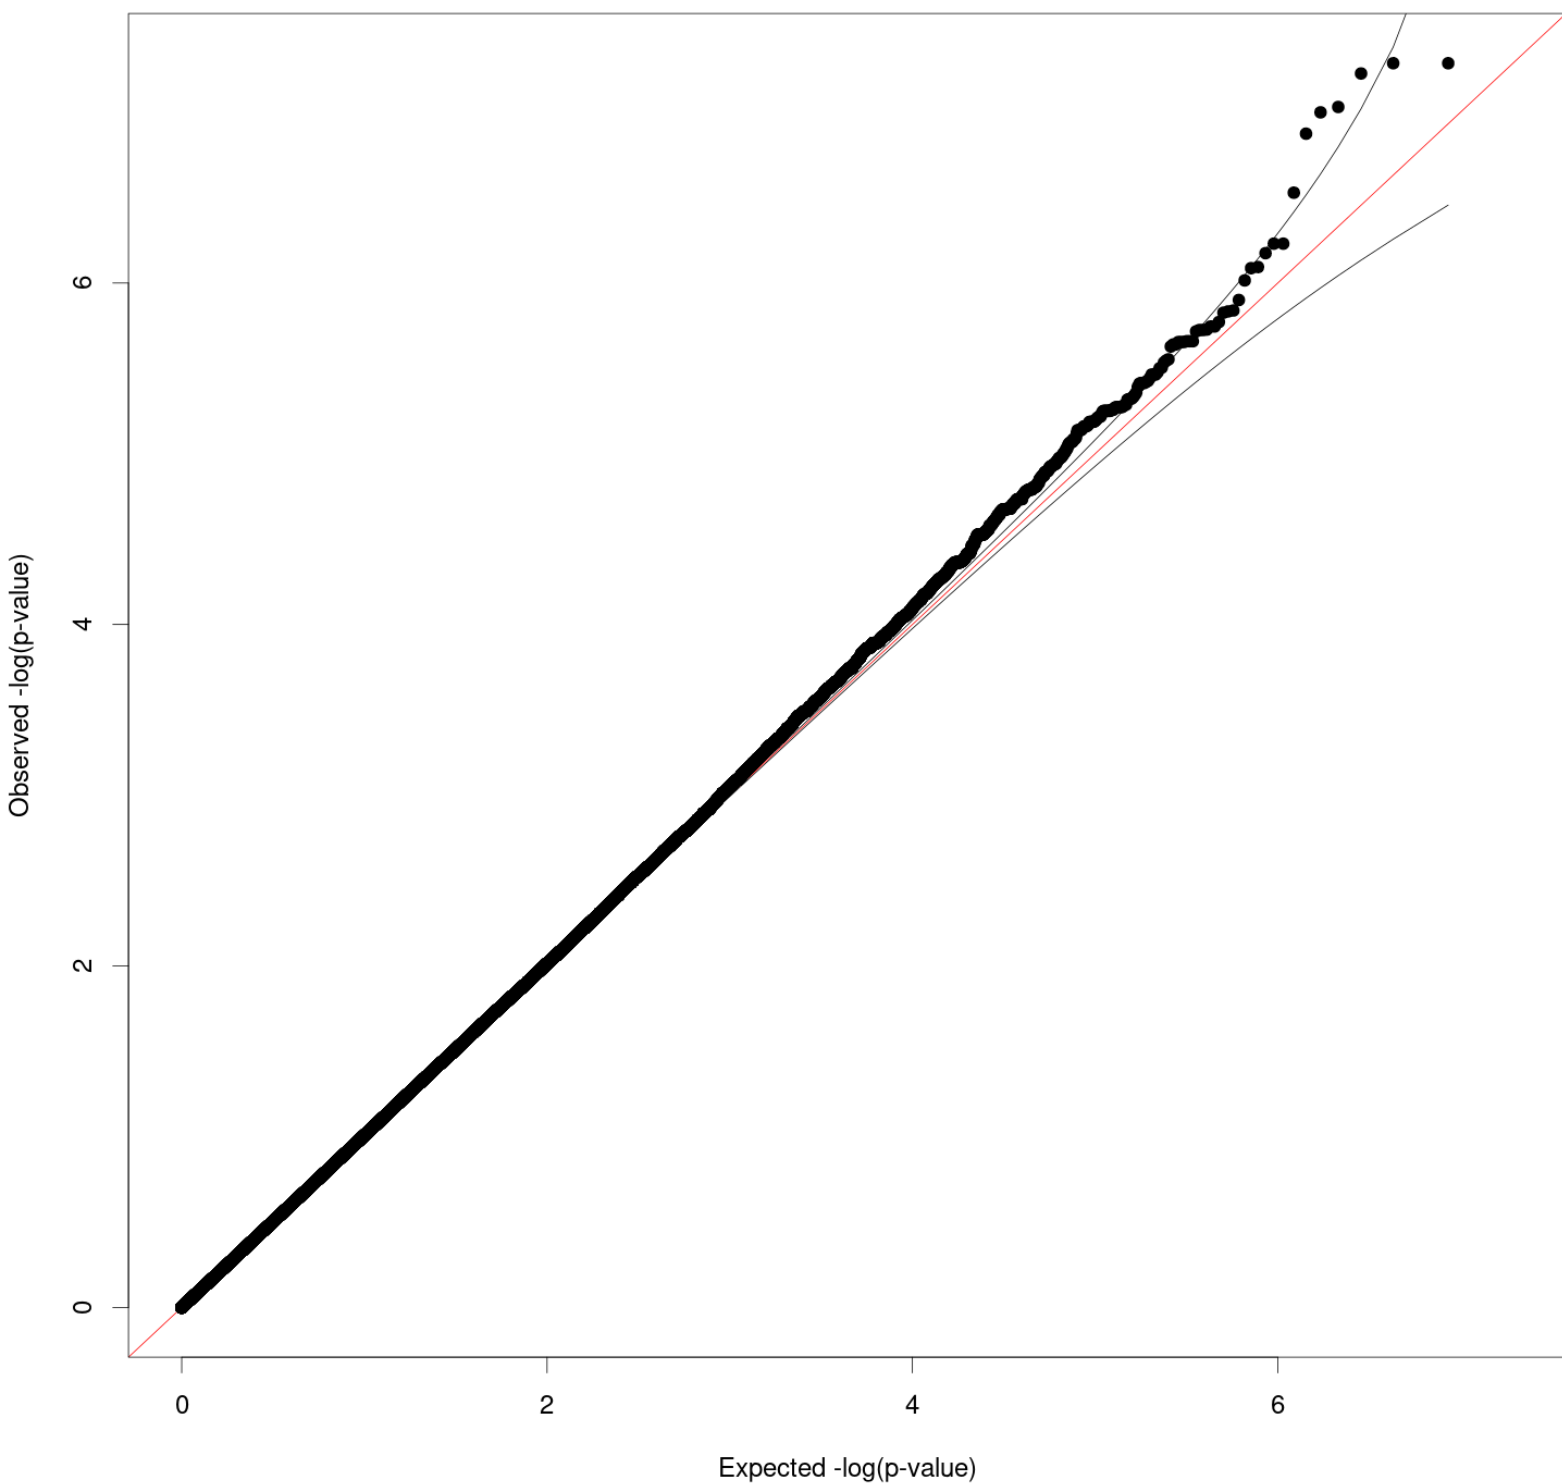

QQ plot for mz162.056\_t60.4, 3-methyl-2-oxindole  
inflation factor = 1.001

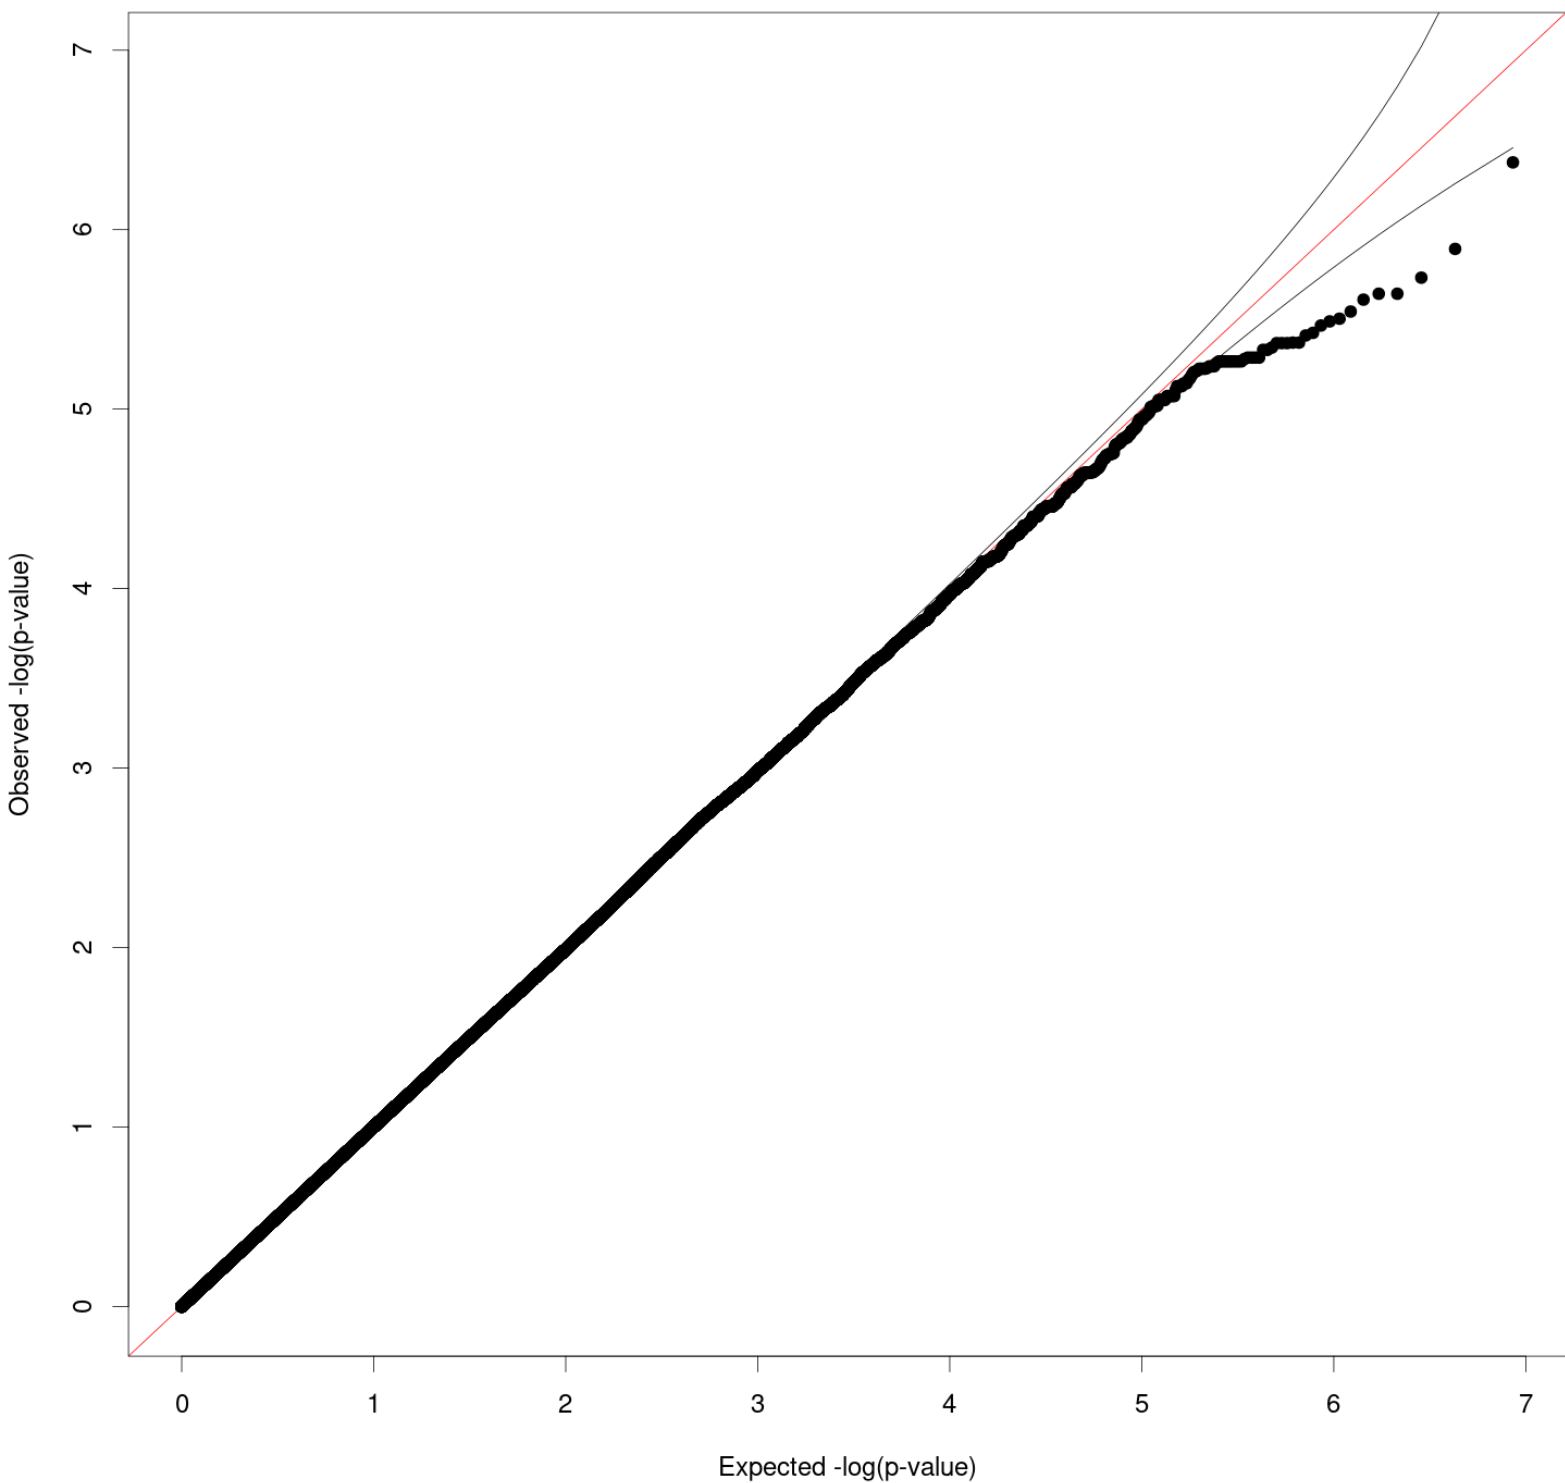

QQ plot for mz162.1124\_t80.7, carnitine  
inflation factor = 1.001

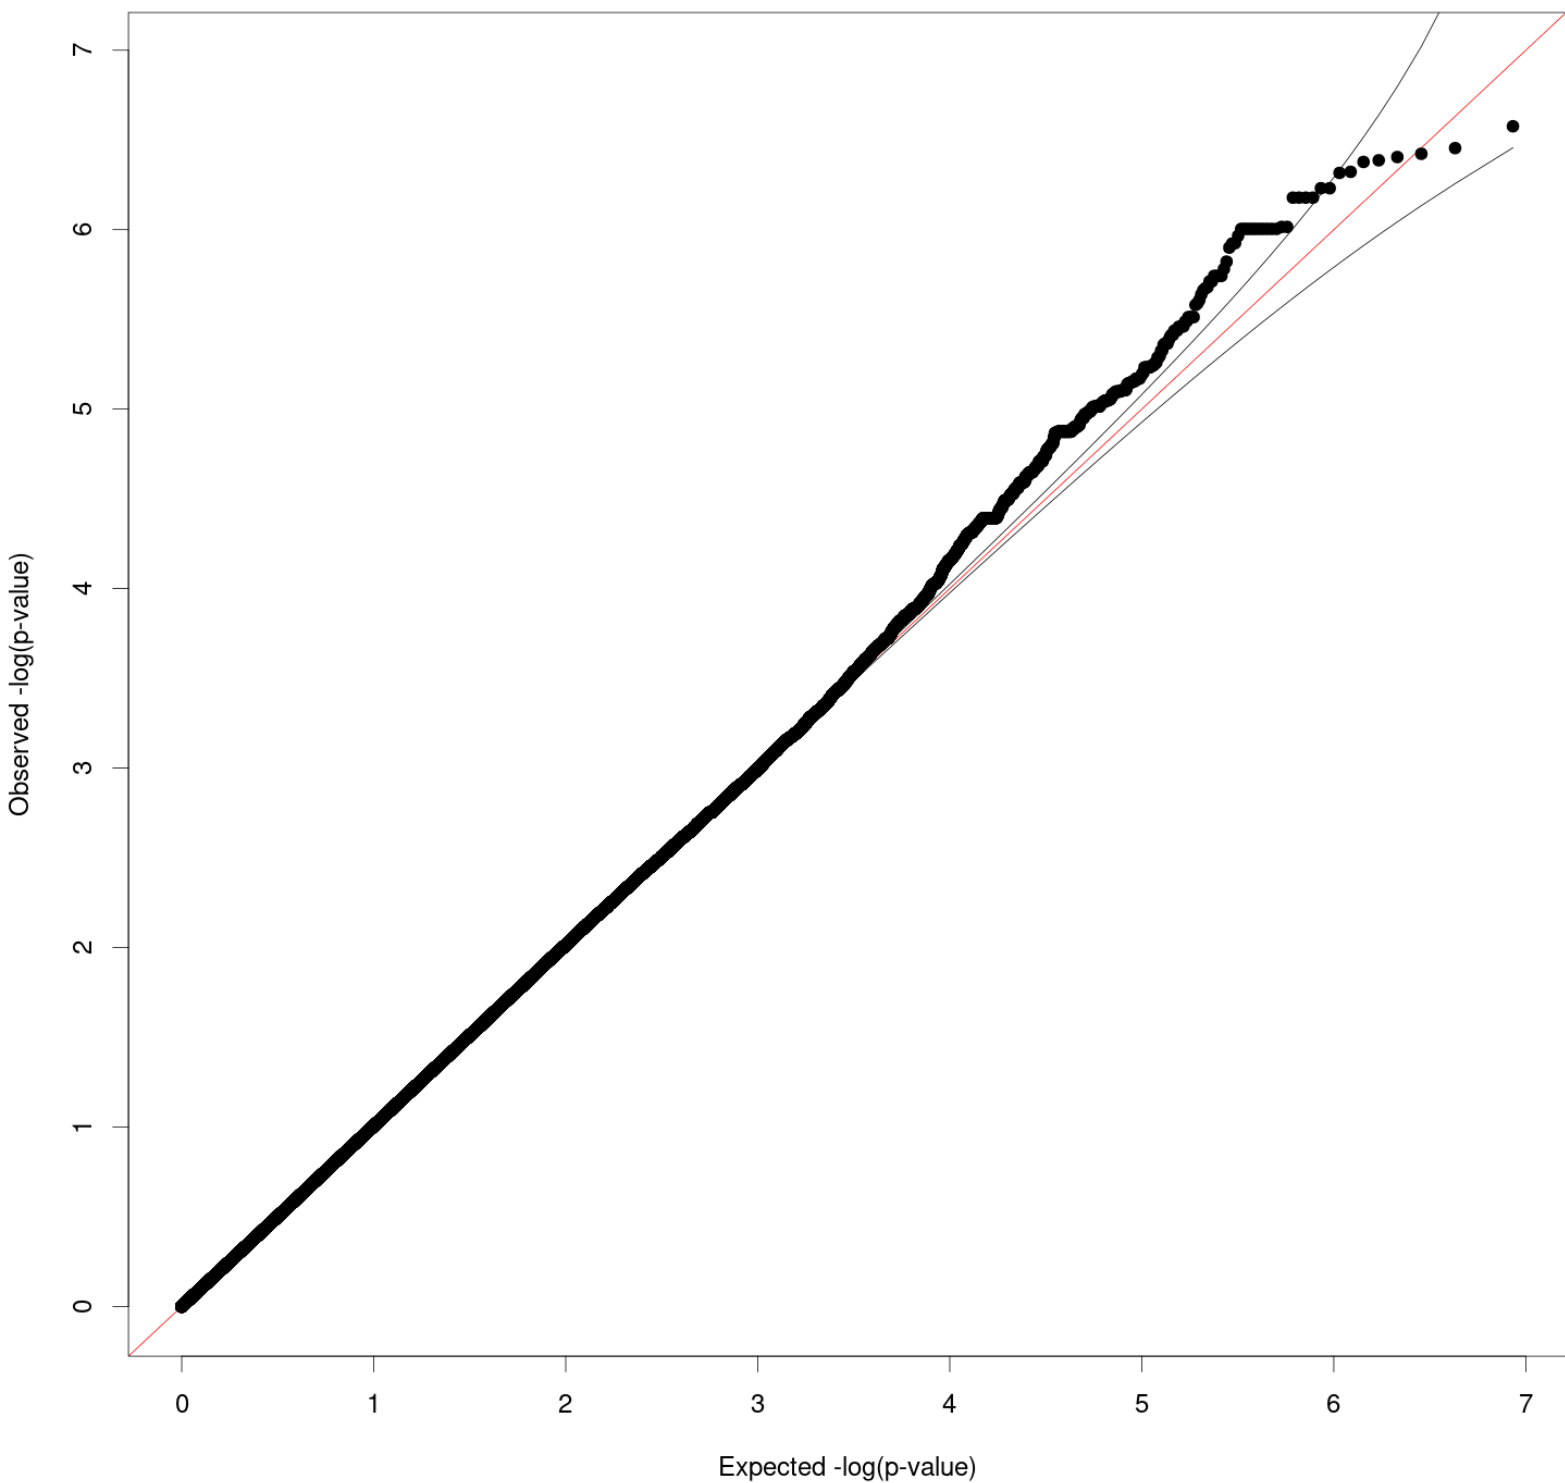



QQ plot for mz163.1229\_t40.3, (s)-nicotine  
inflation factor = 1.006

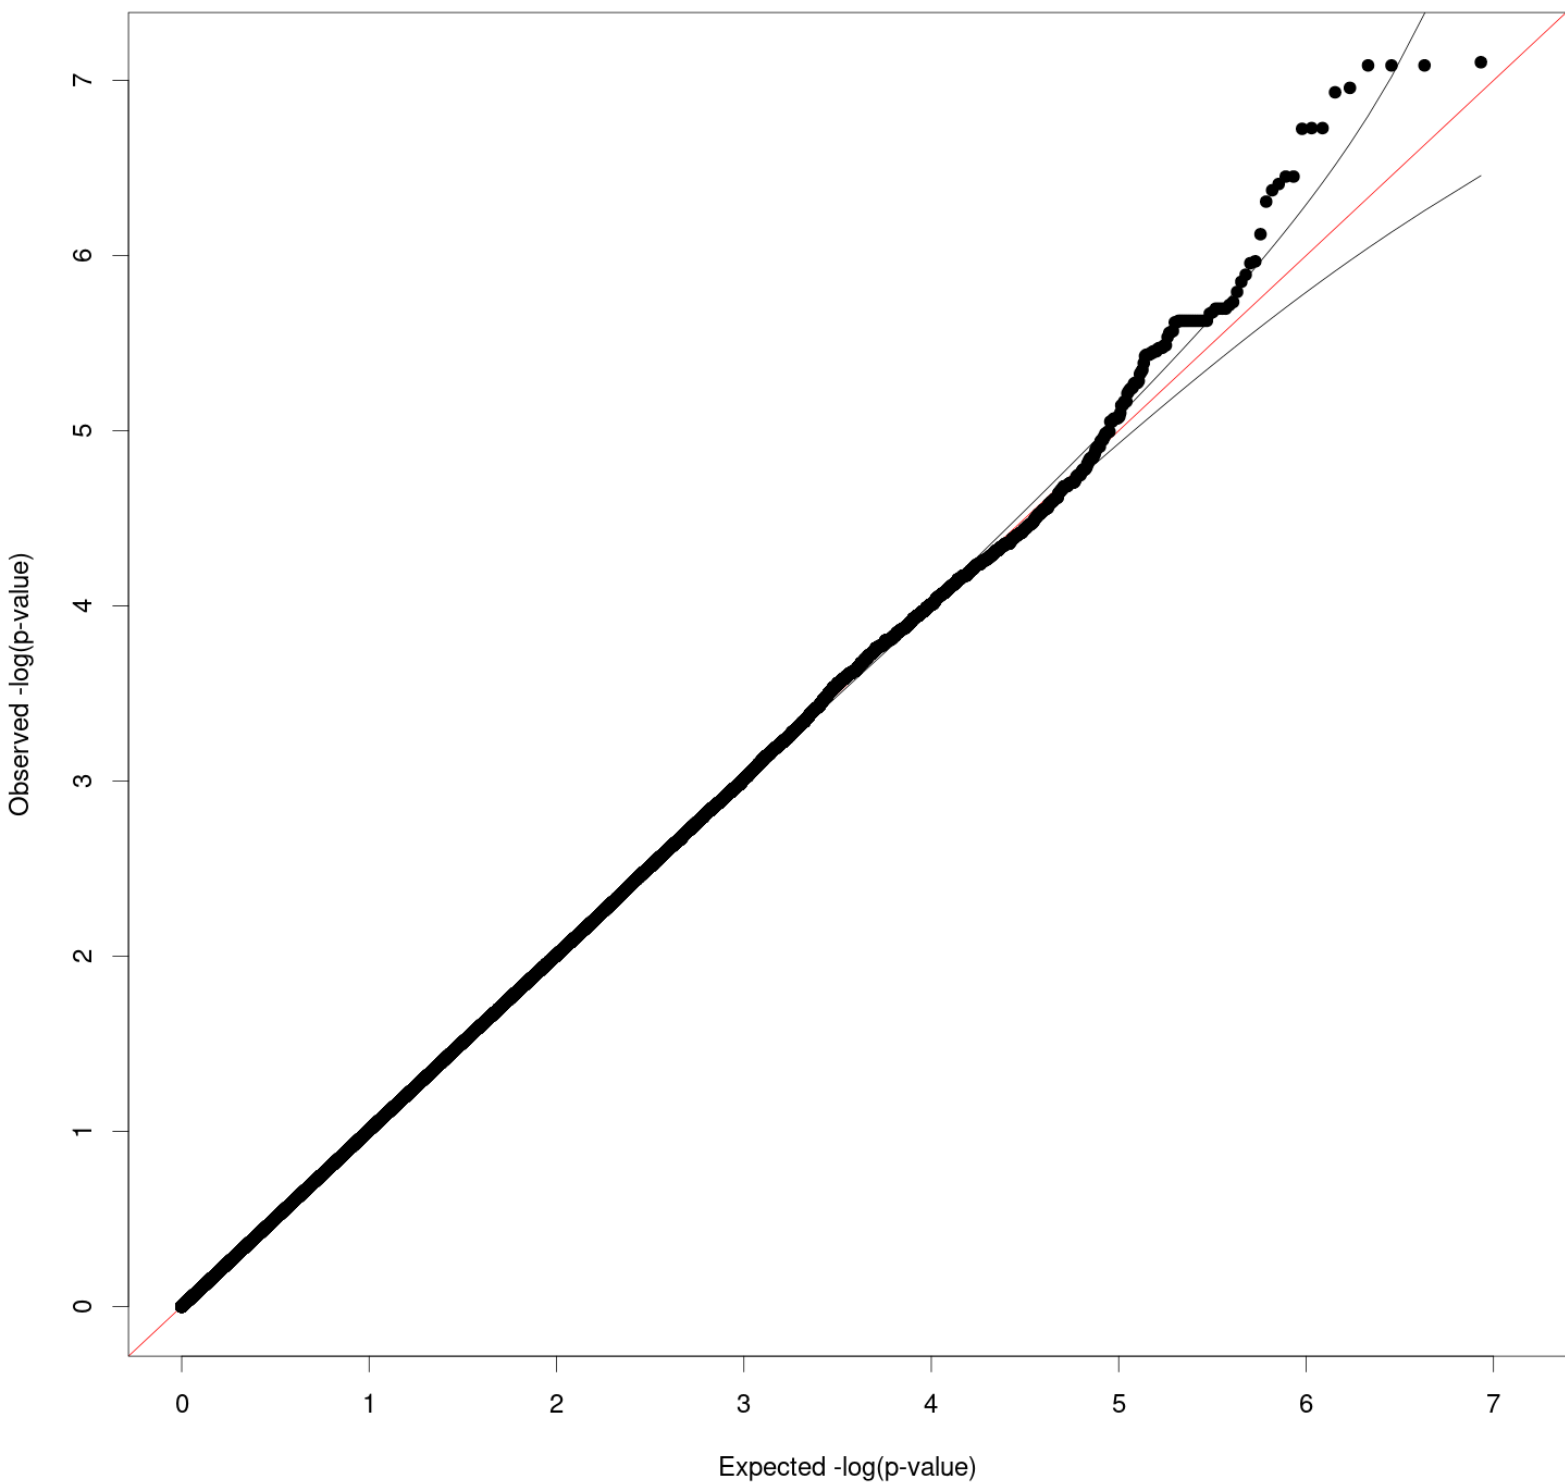

QQ plot for mz164.0377\_t43.9, n-acetyl-l-cysteine  
inflation factor = 0.9998

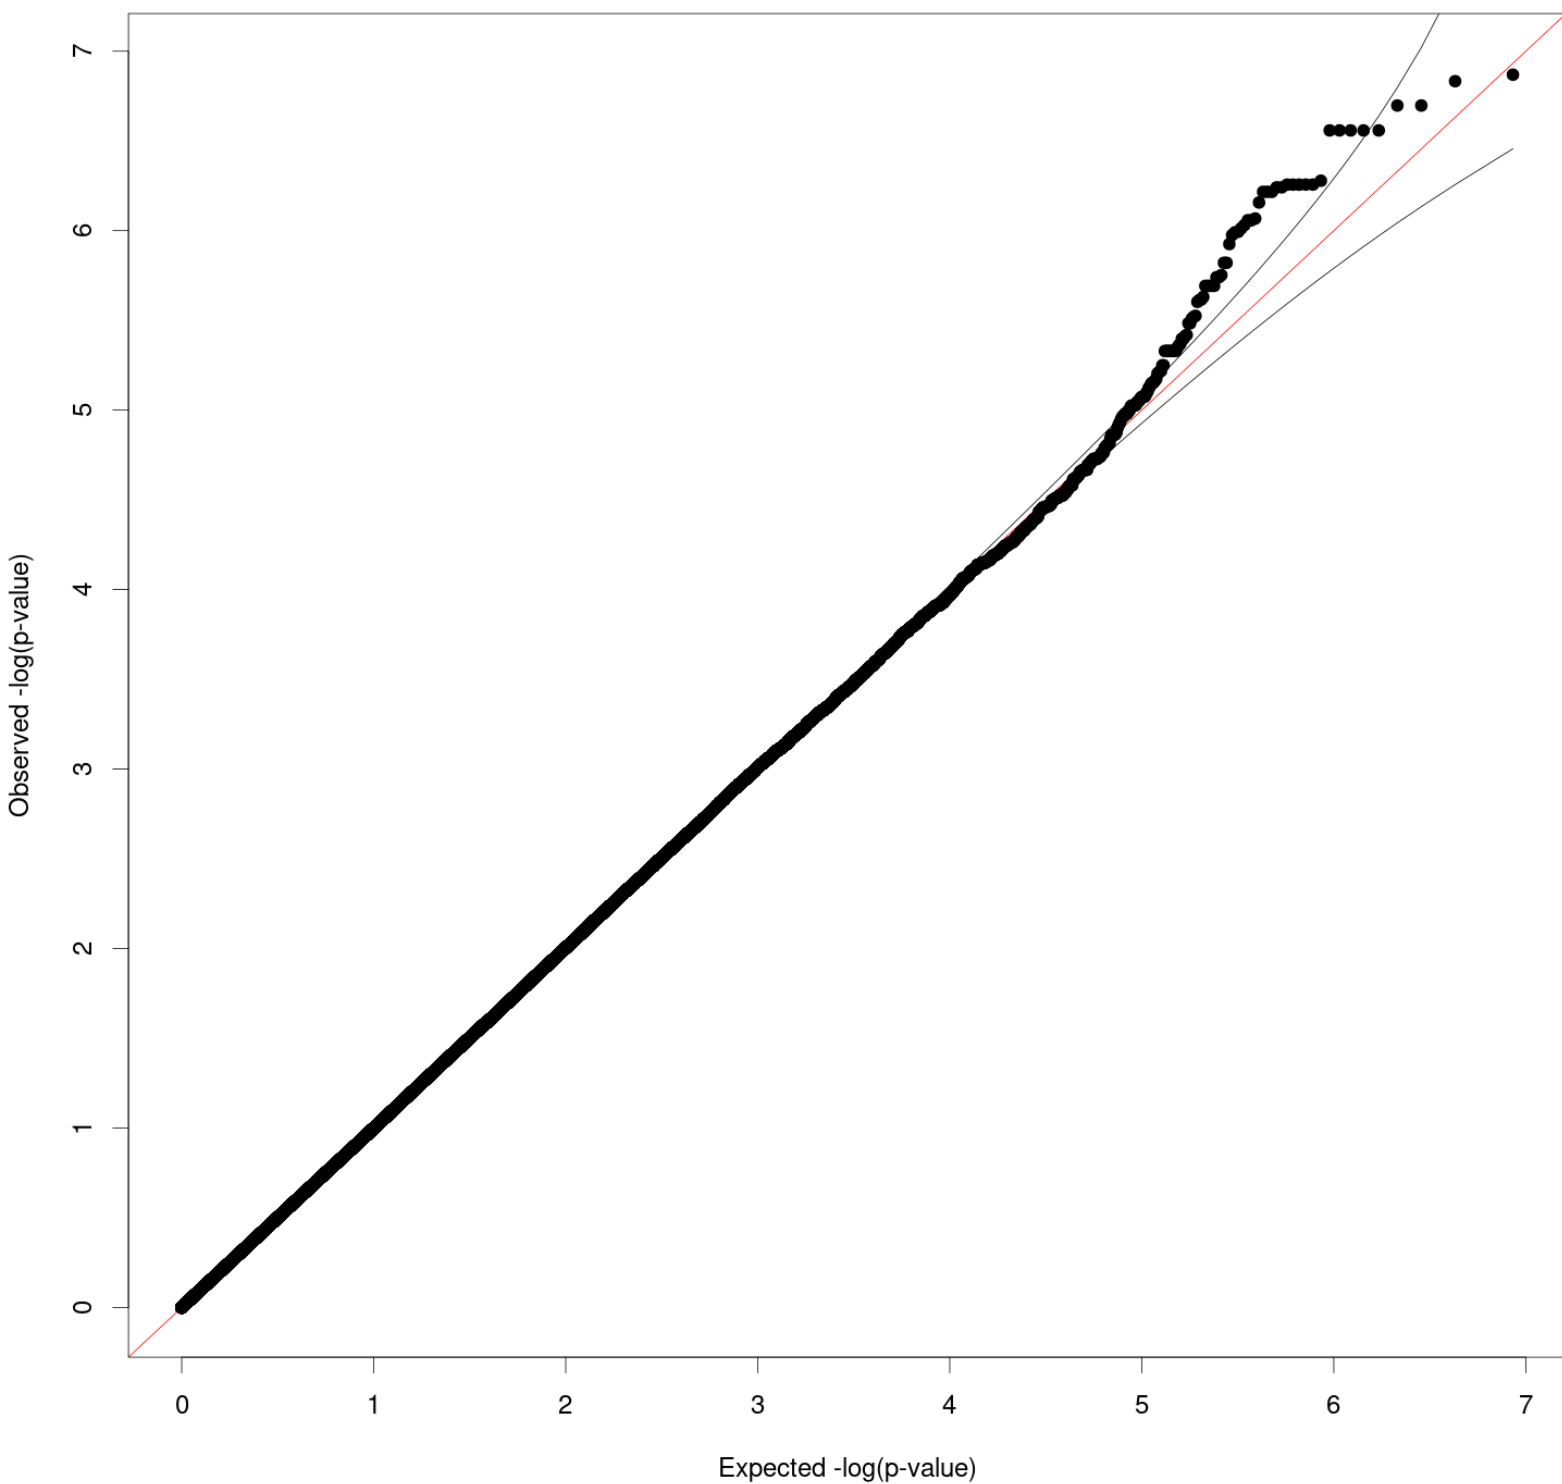

QQ plot for mz164.0717\_t22.7, phenylalanine  
inflation factor = 0.9968

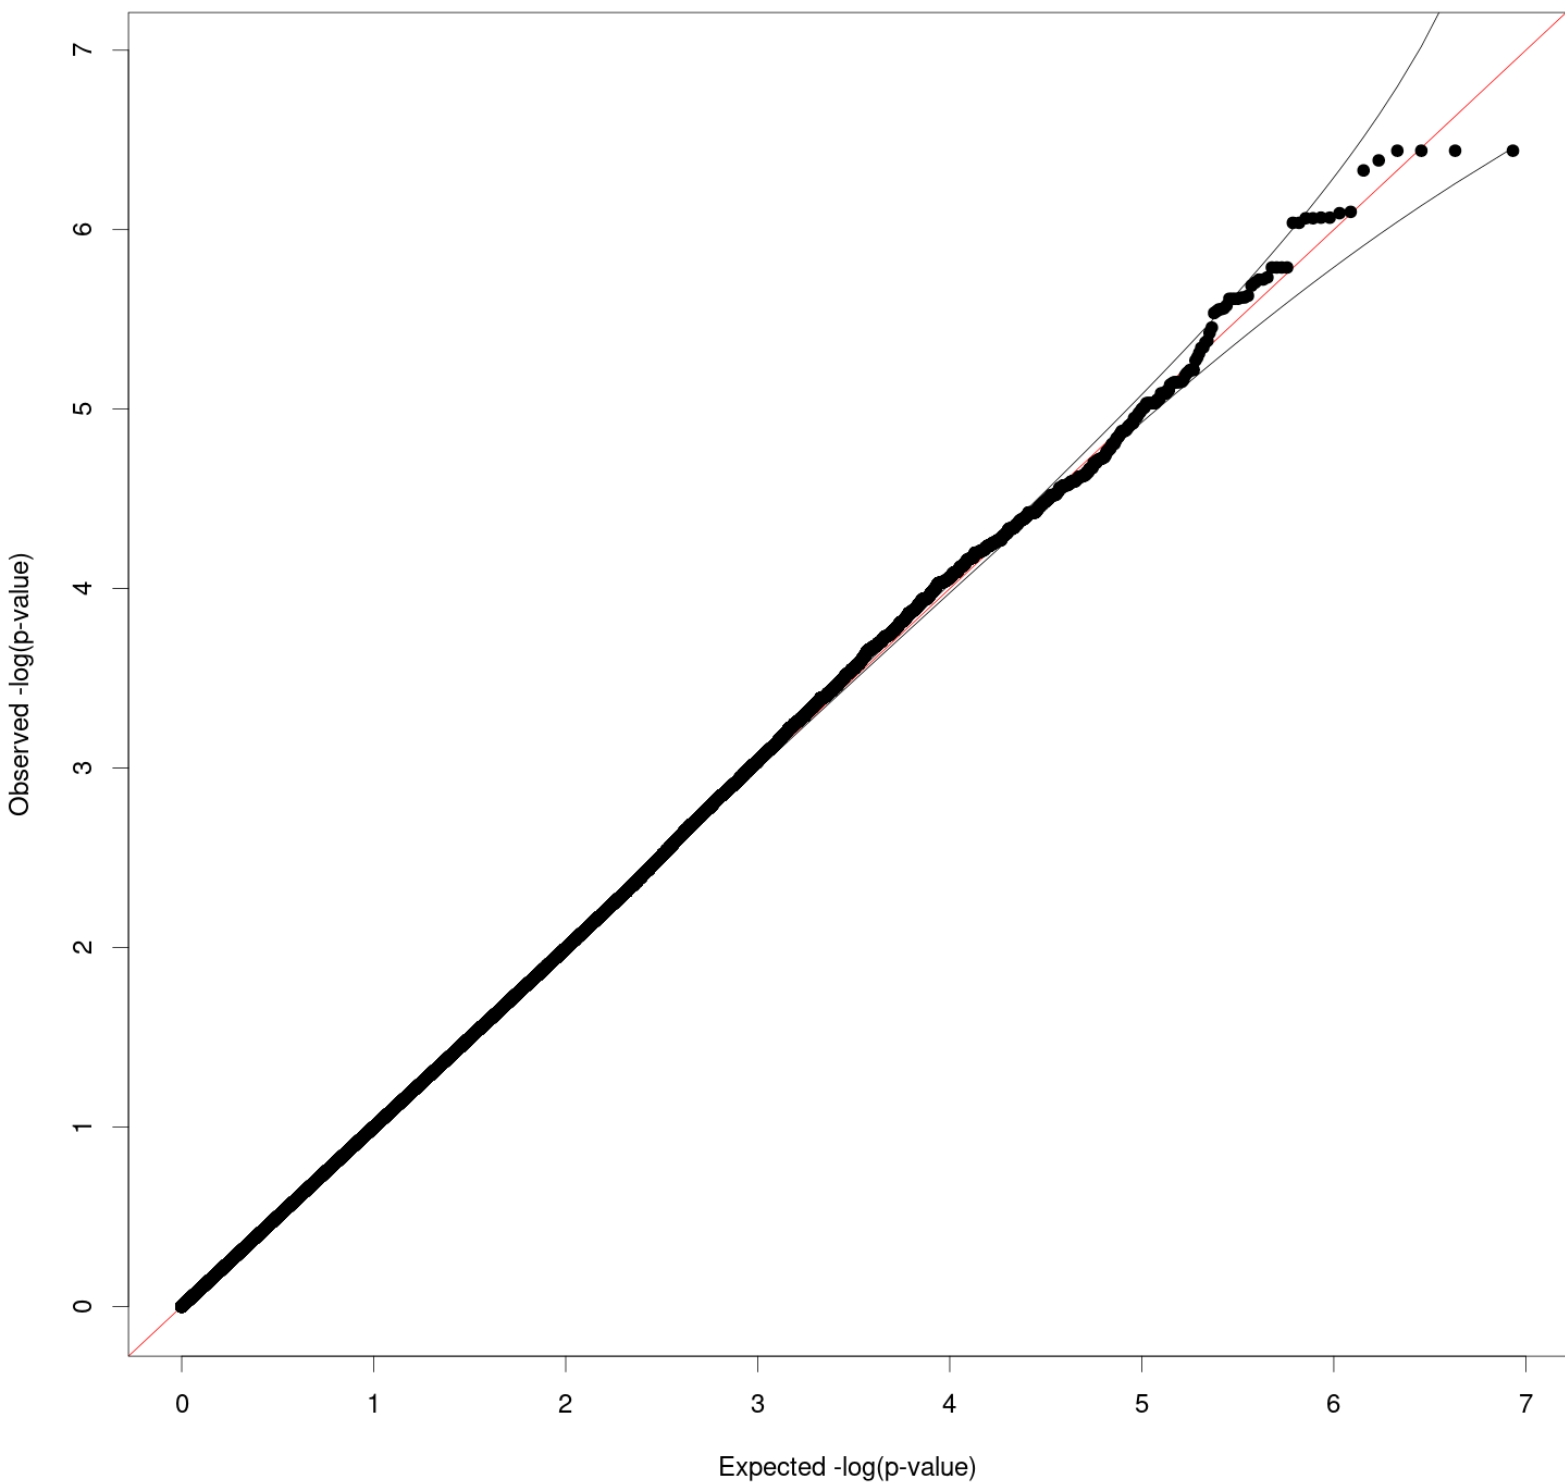

QQ plot for mz165.0557\_t49.5, 3-(2-hydroxyphenyl)propanoate  
inflation factor = 1.003

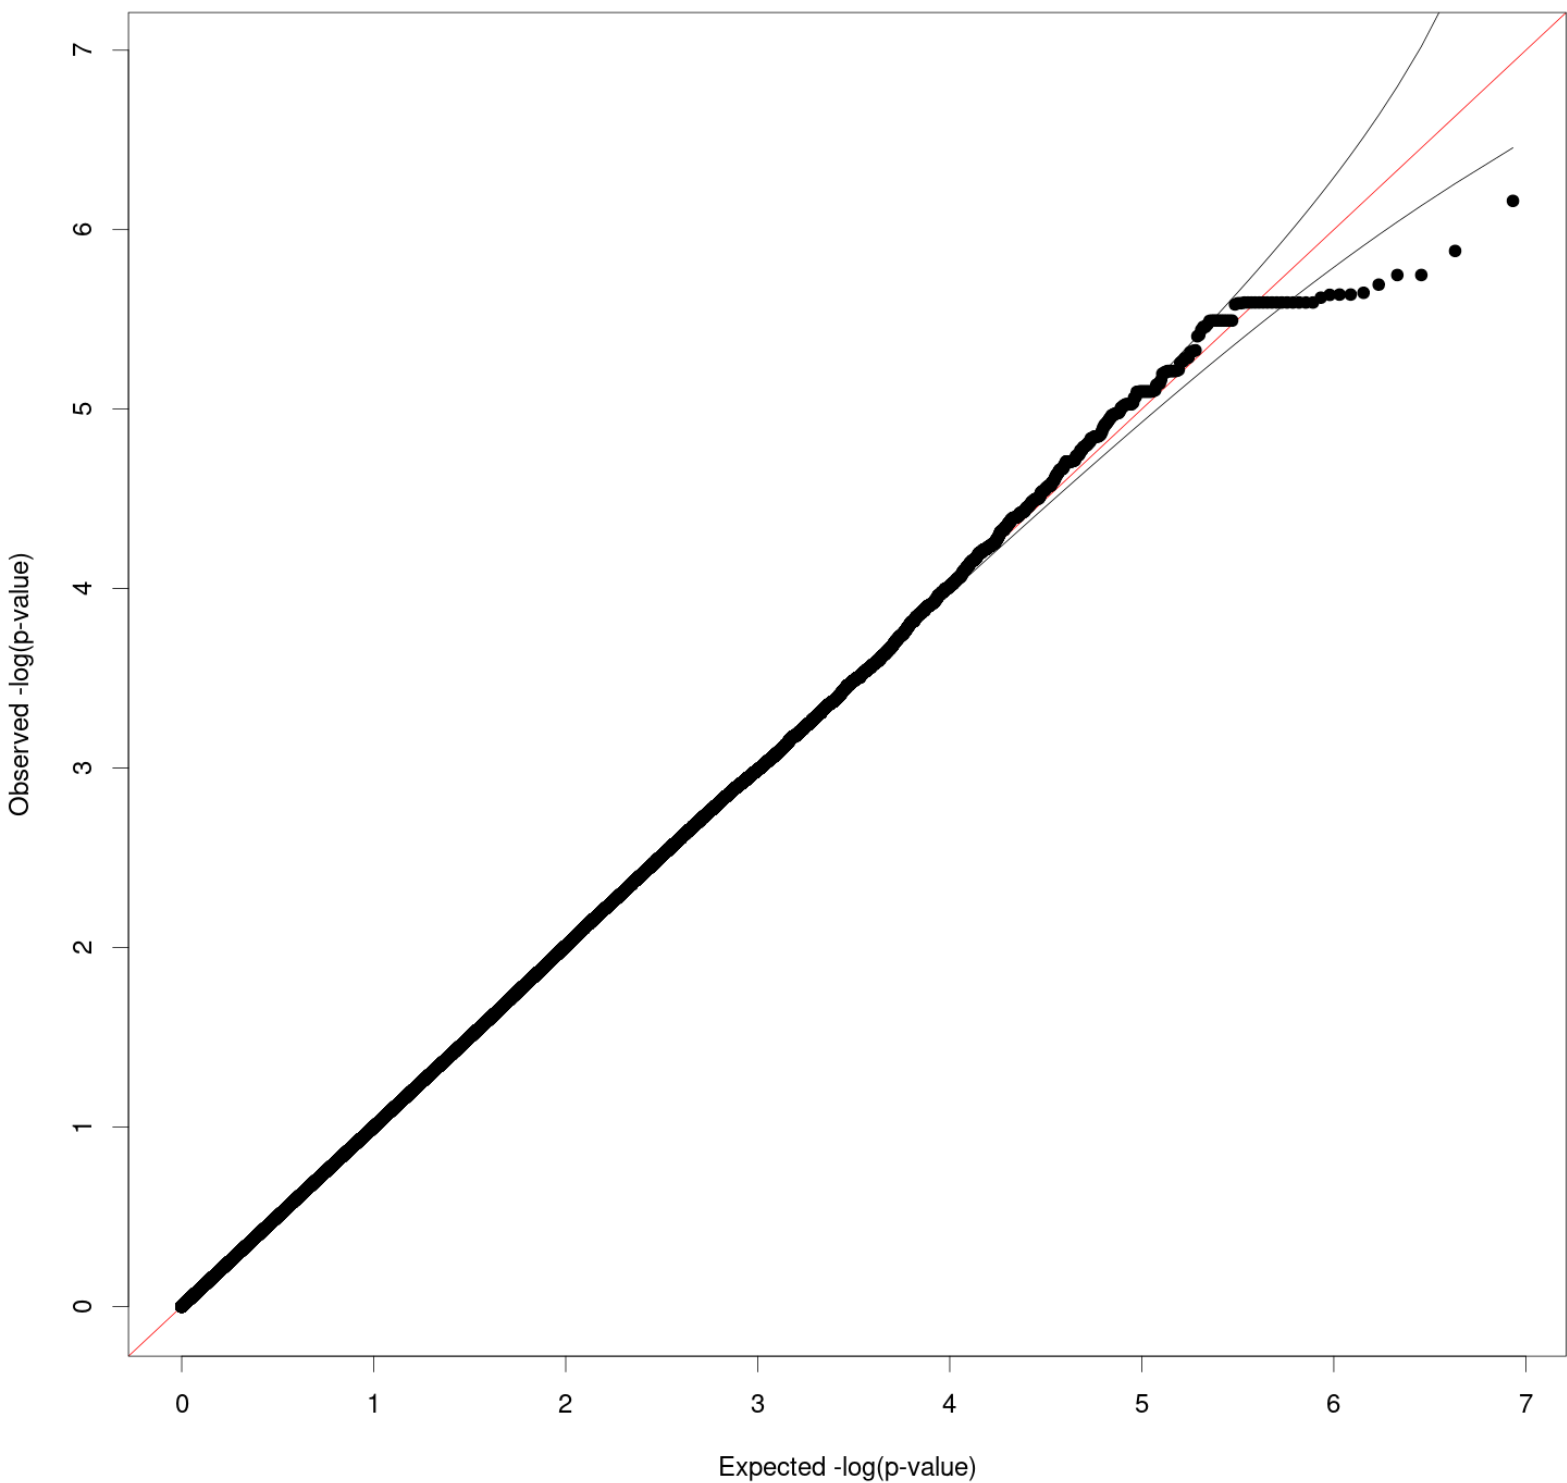

QQ plot for mz166.0862\_t46.5, phenylalanine  
inflation factor = 0.9954

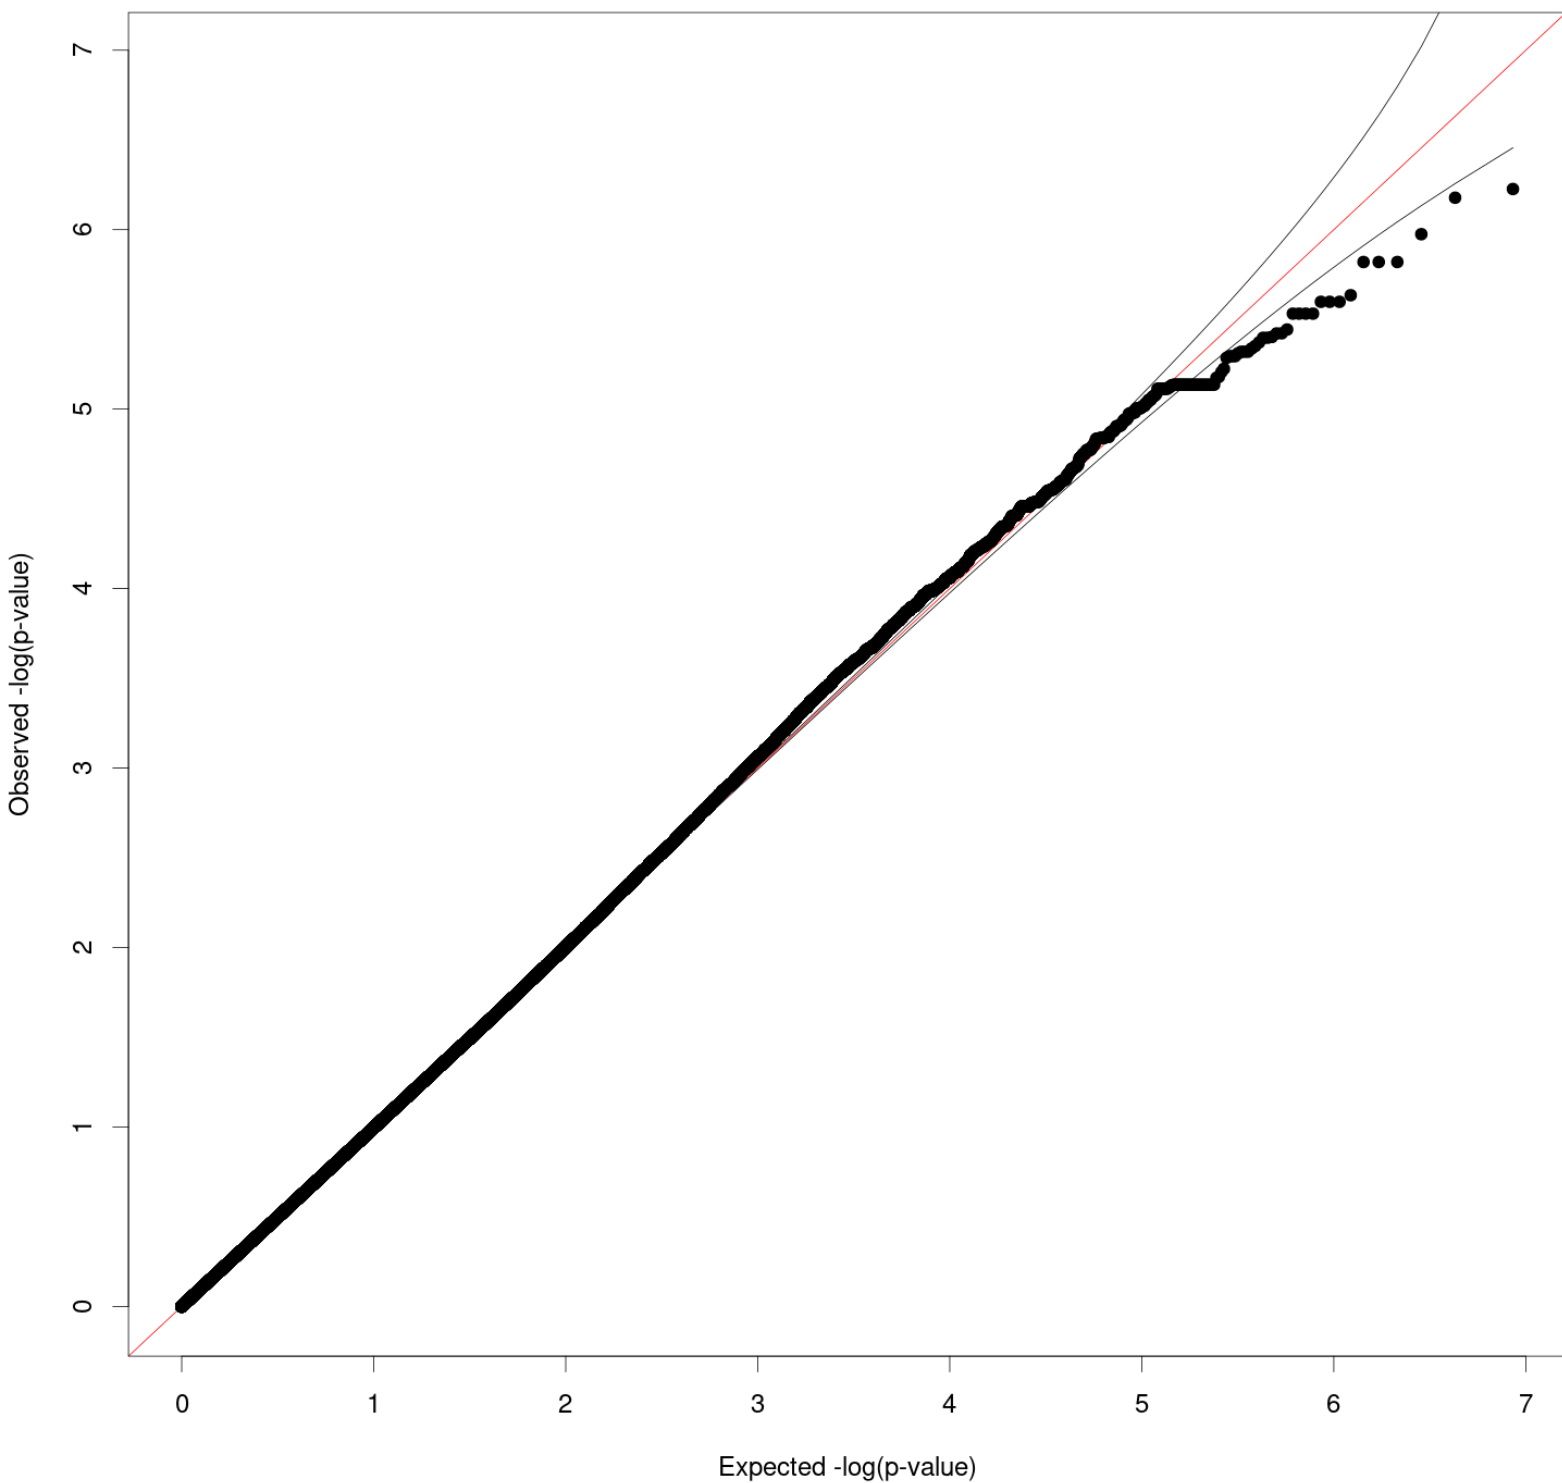

QQ plot for mz167.0211\_t23.9, urate  
inflation factor = 1.002

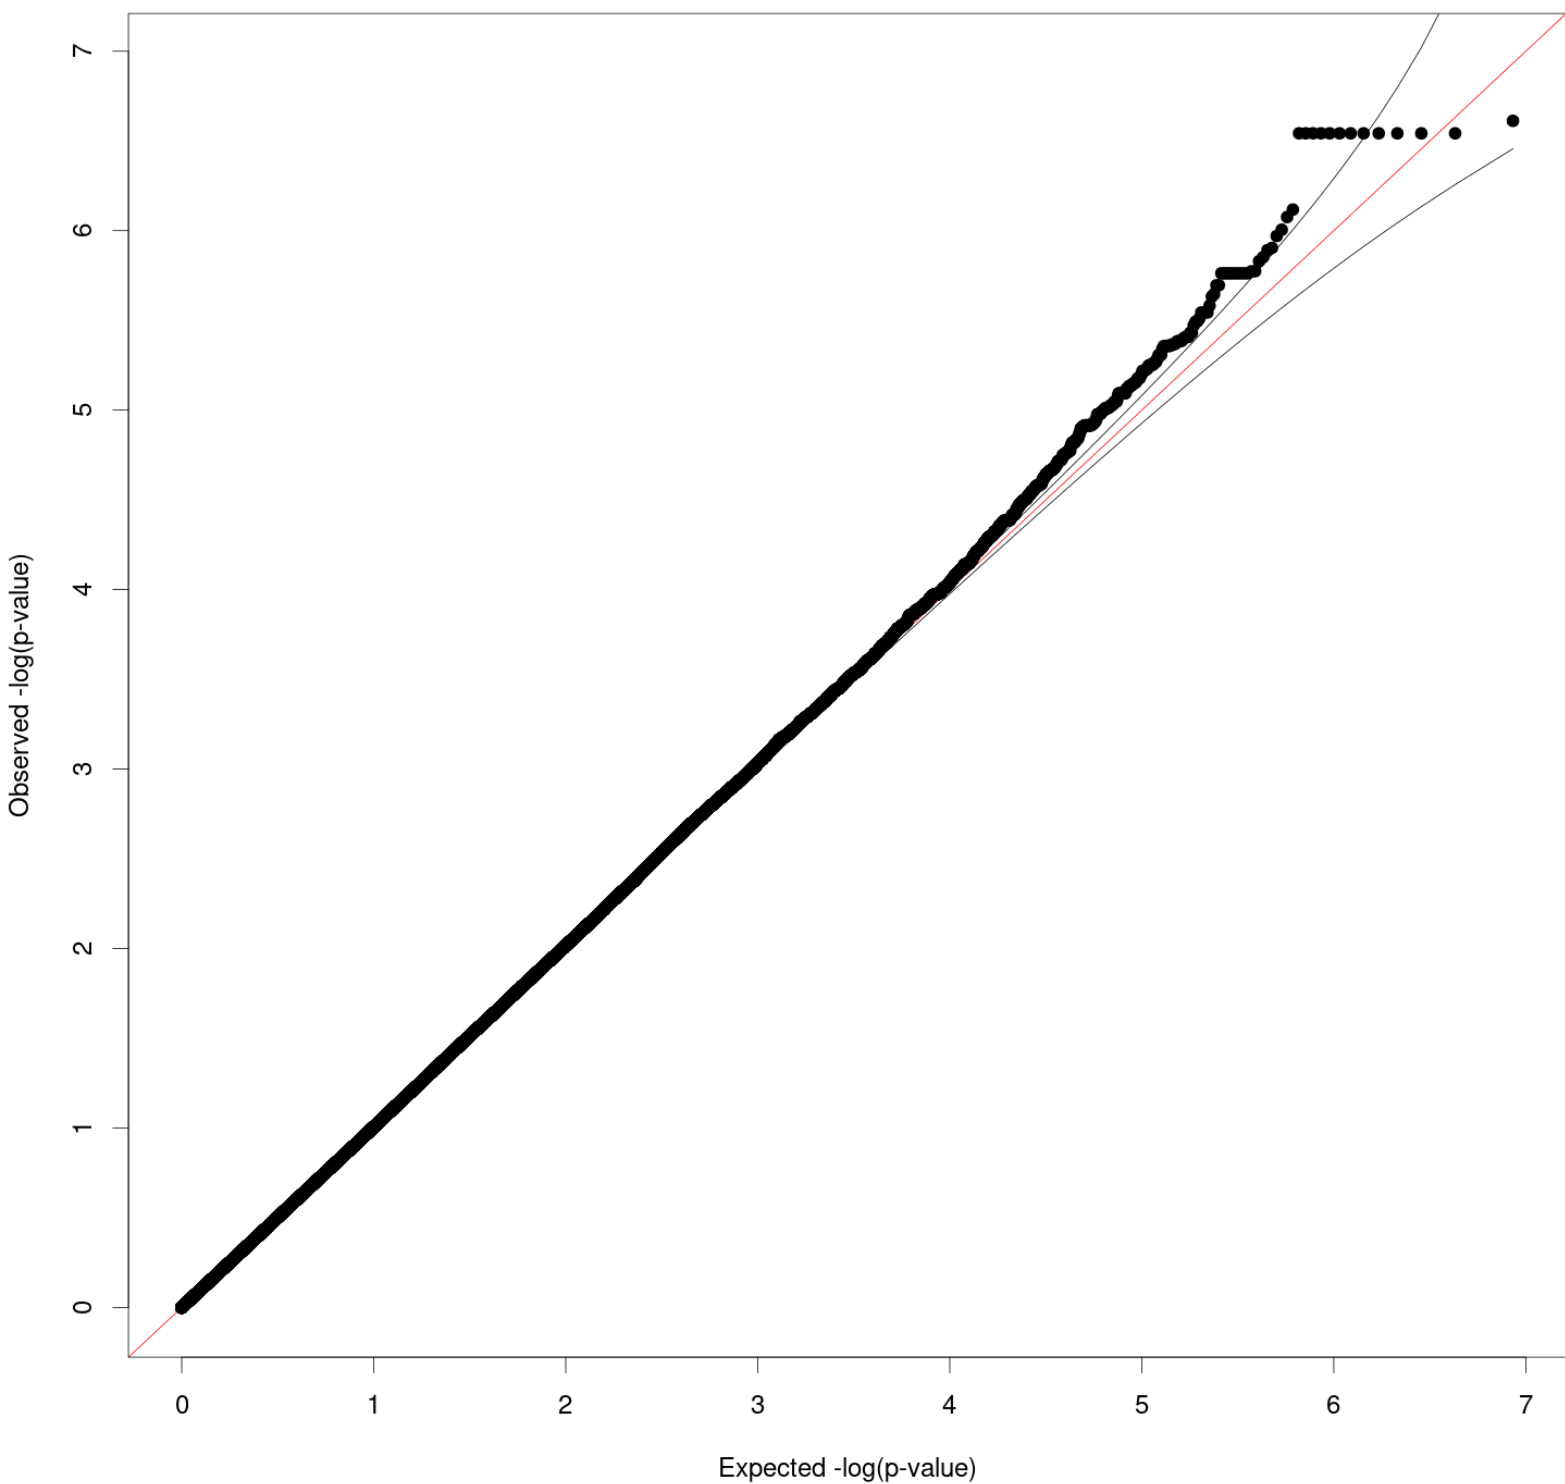

QQ plot for mz168.1019\_t36, 3-methoxytyramine  
inflation factor = 0.9977

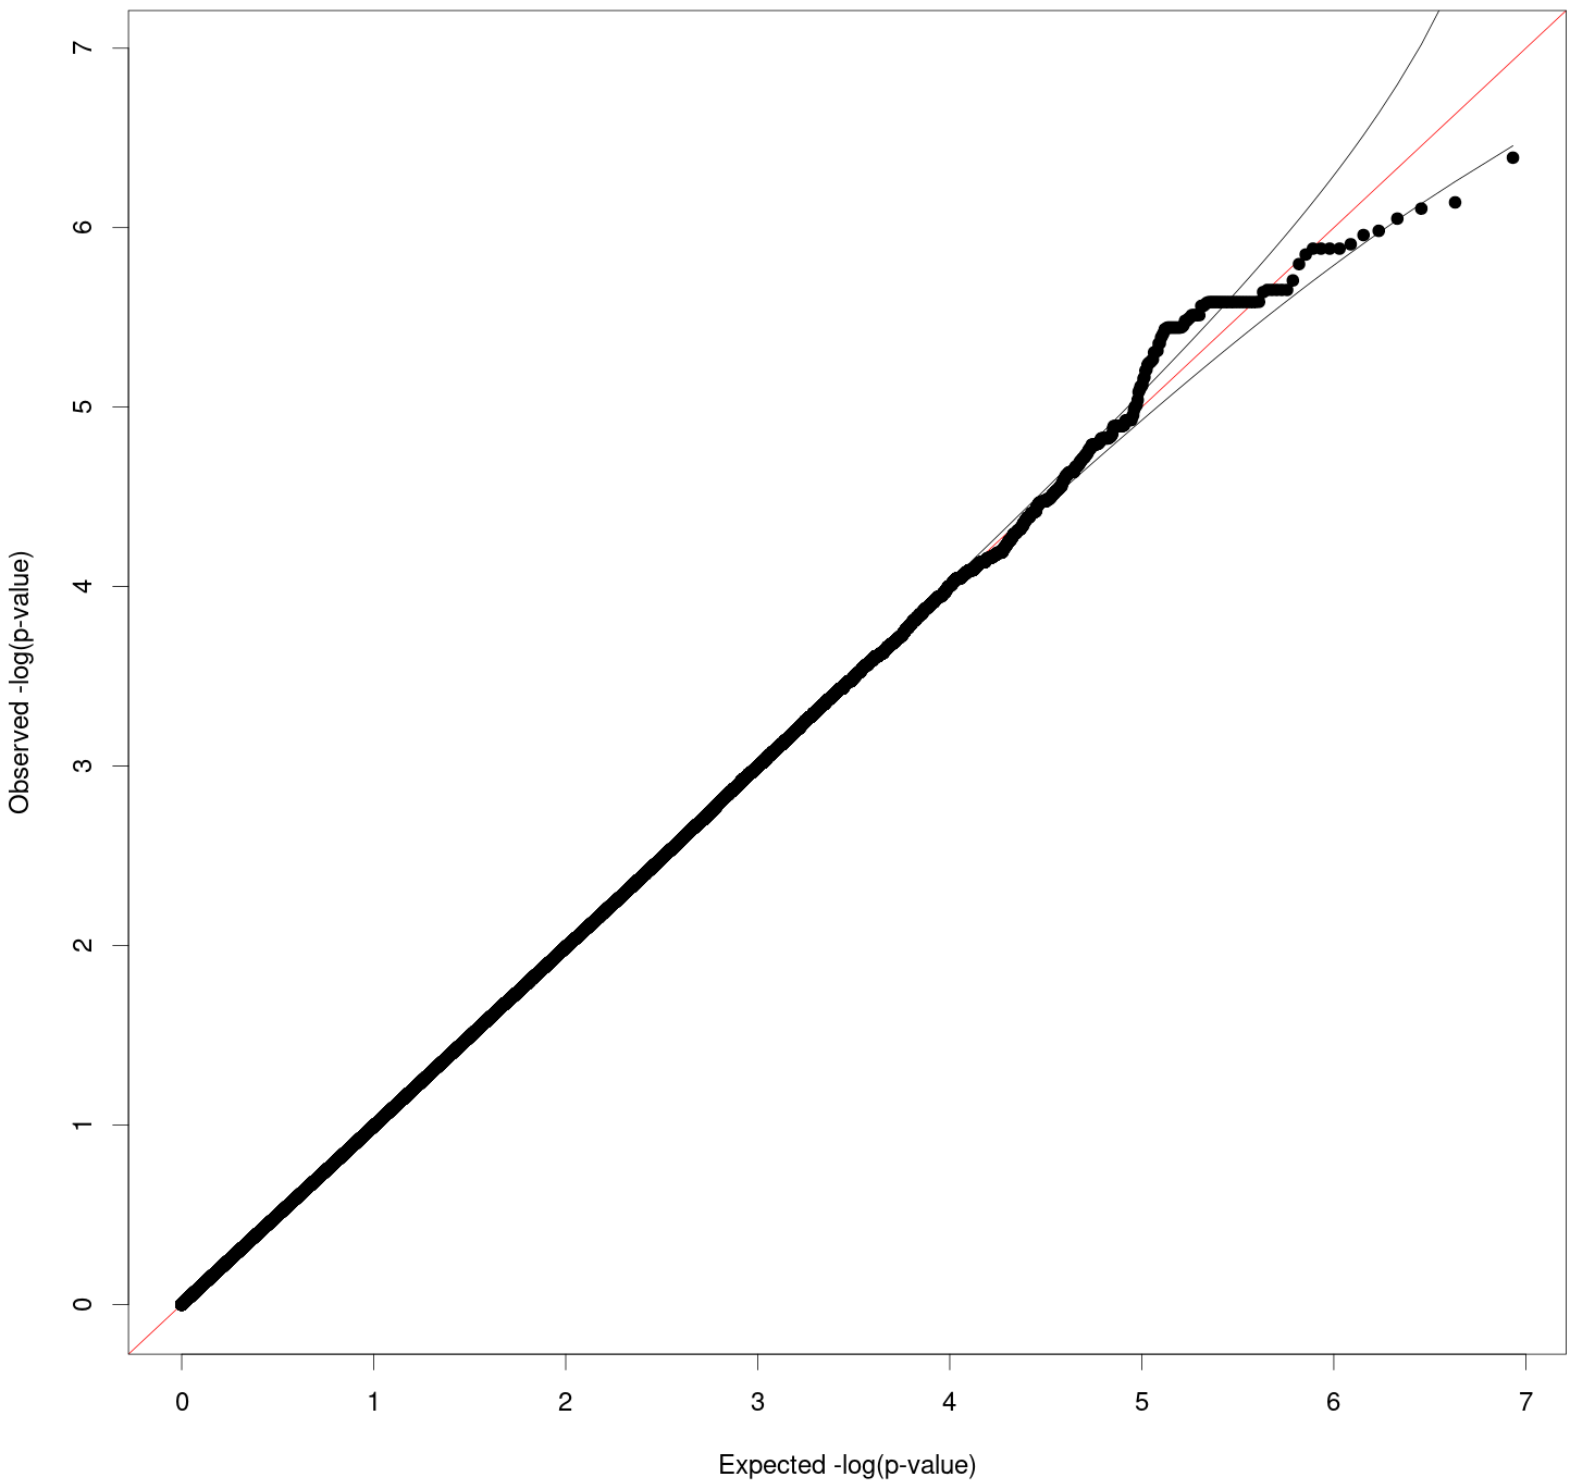

QQ plot for mz169.0357\_t49, urate  
inflation factor = 0.9996

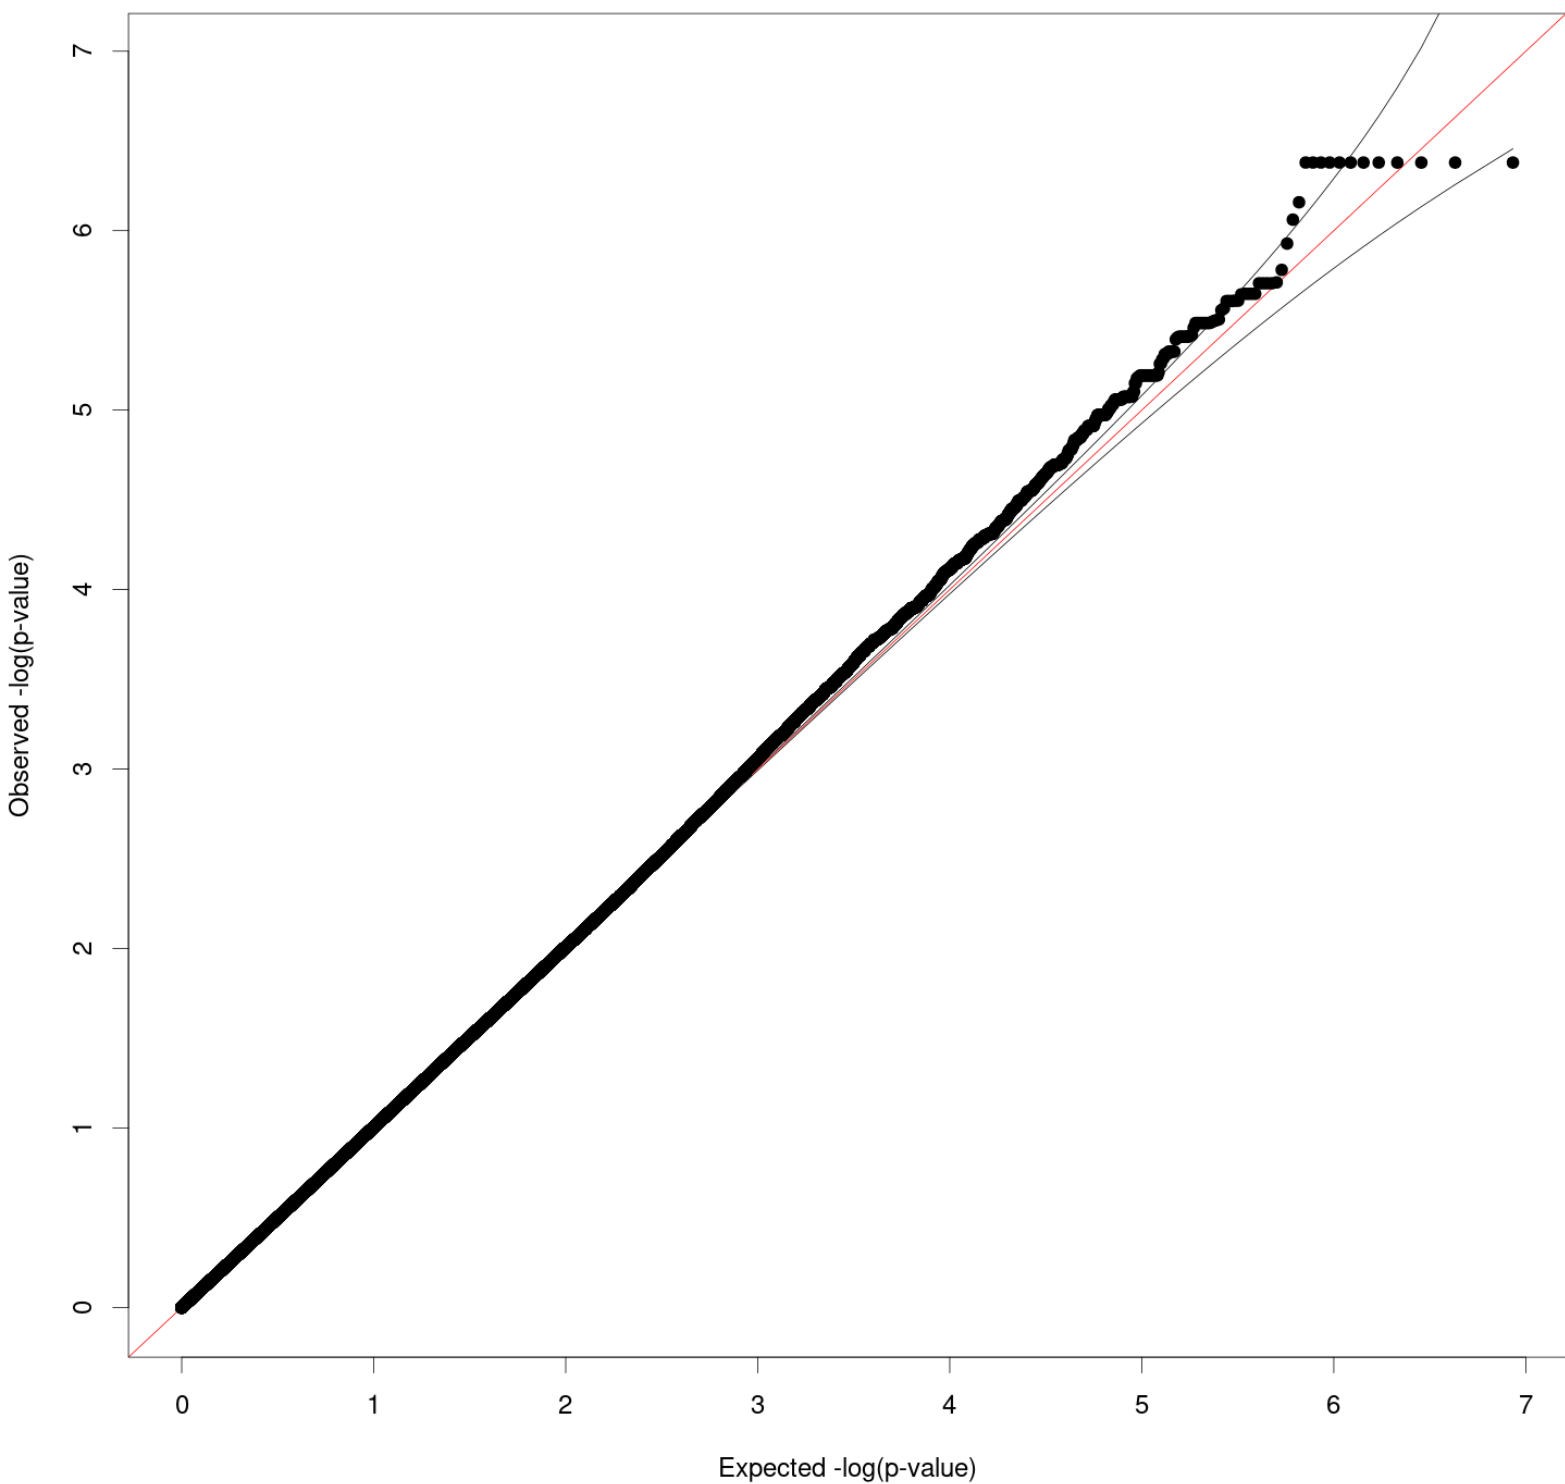



QQ plot for mz169.0971\_t67.2, pyridoxamine  
inflation factor = 1.004

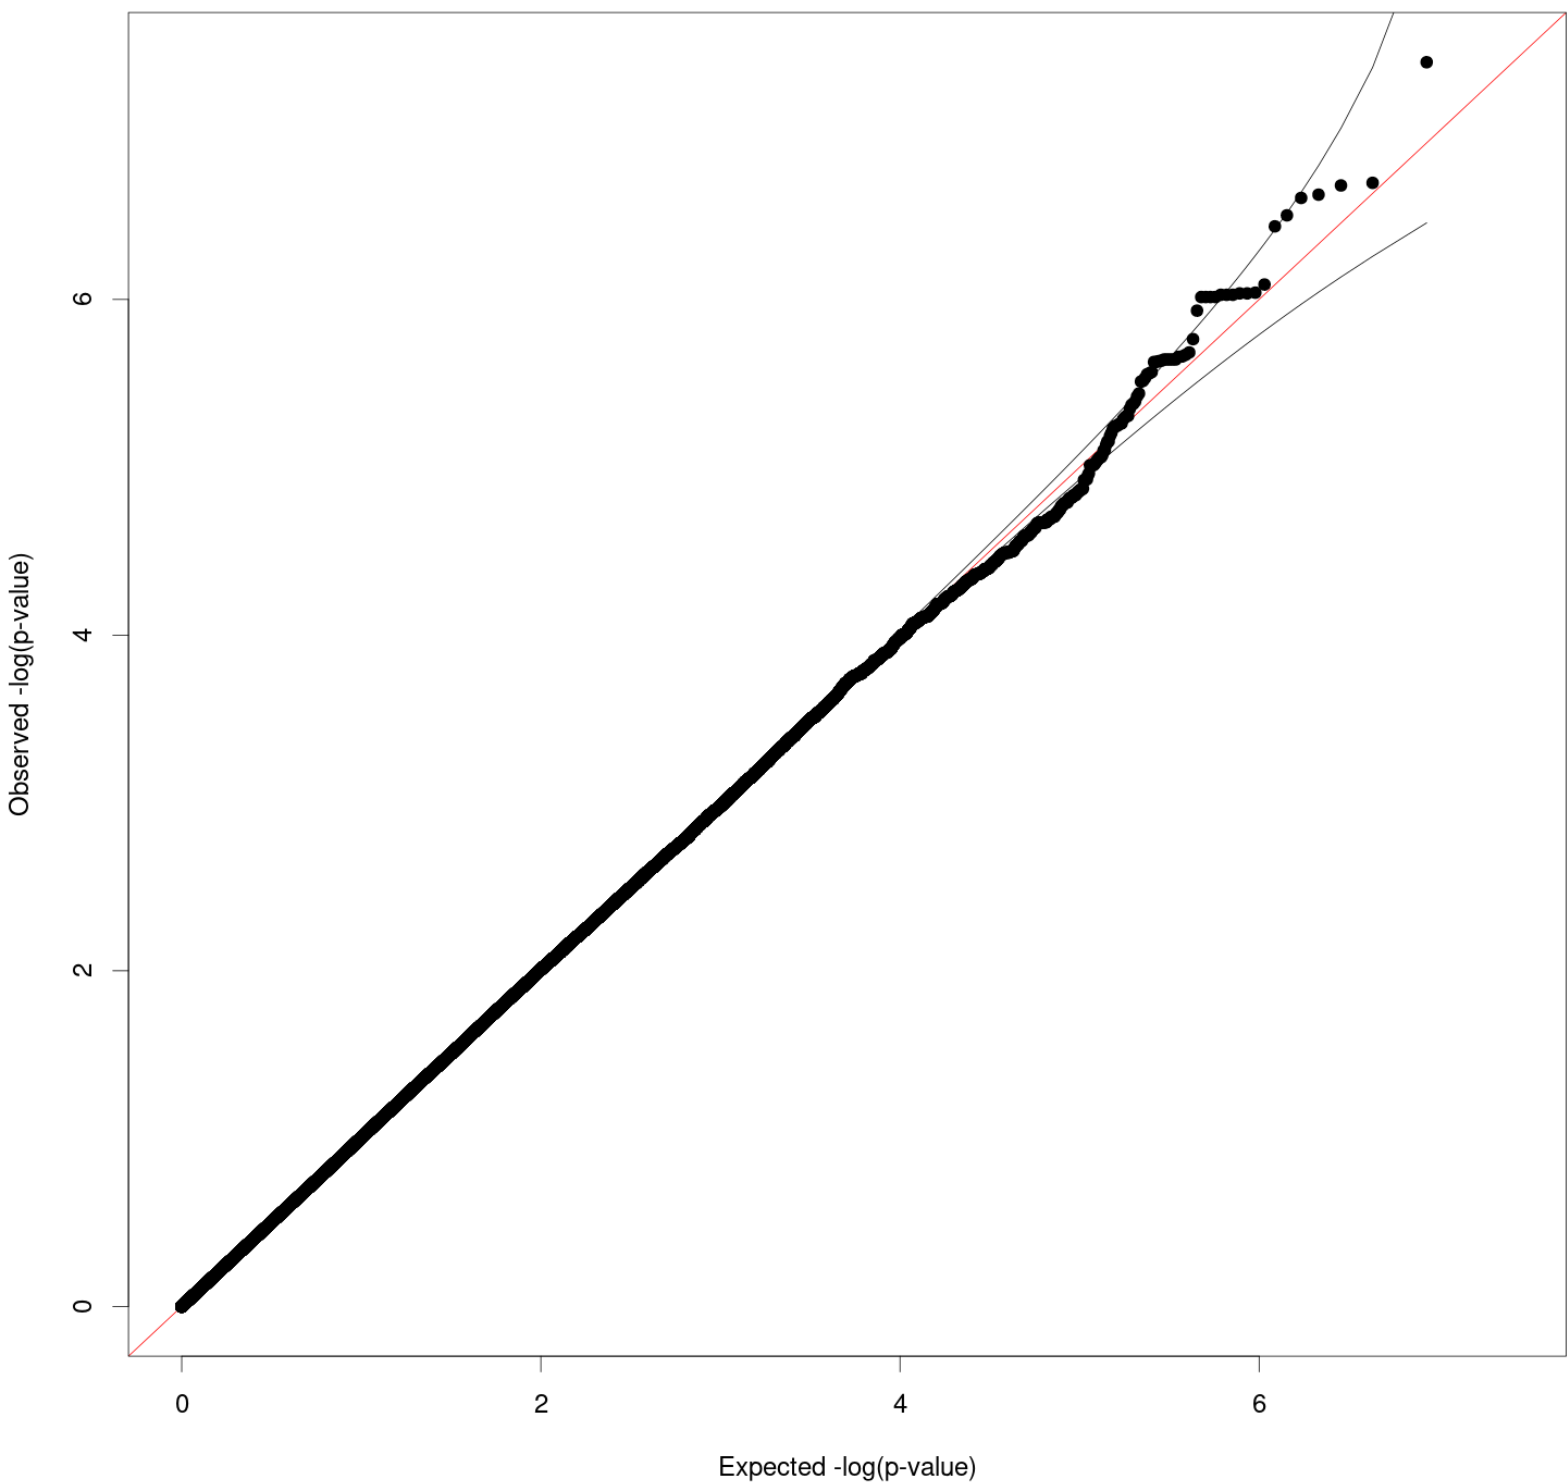

QQ plot for mz173.0091\_t25.6, trans-aconitate  
inflation factor = 0.9966

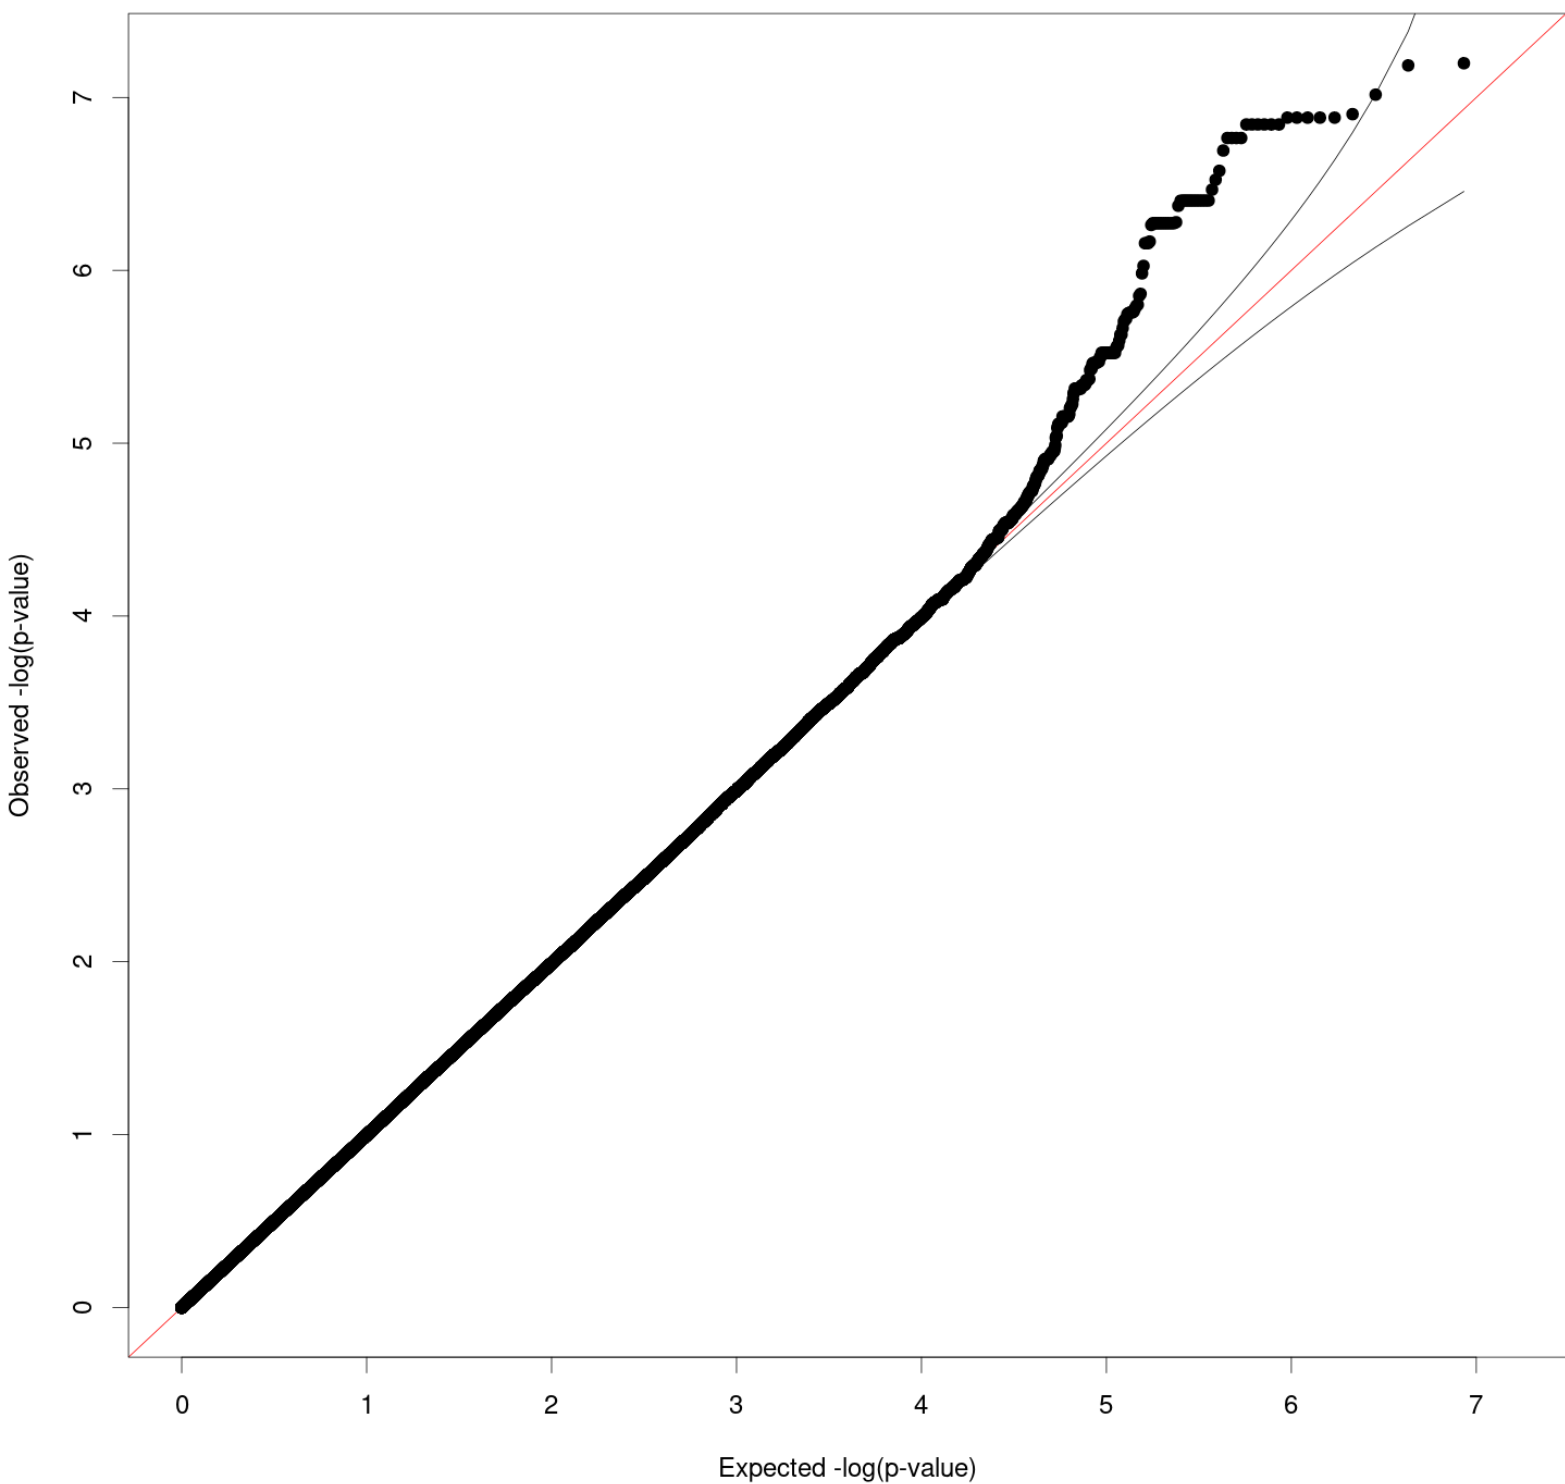

QQ plot for mz173.0456\_t23.2, shikimate  
inflation factor = 0.9946

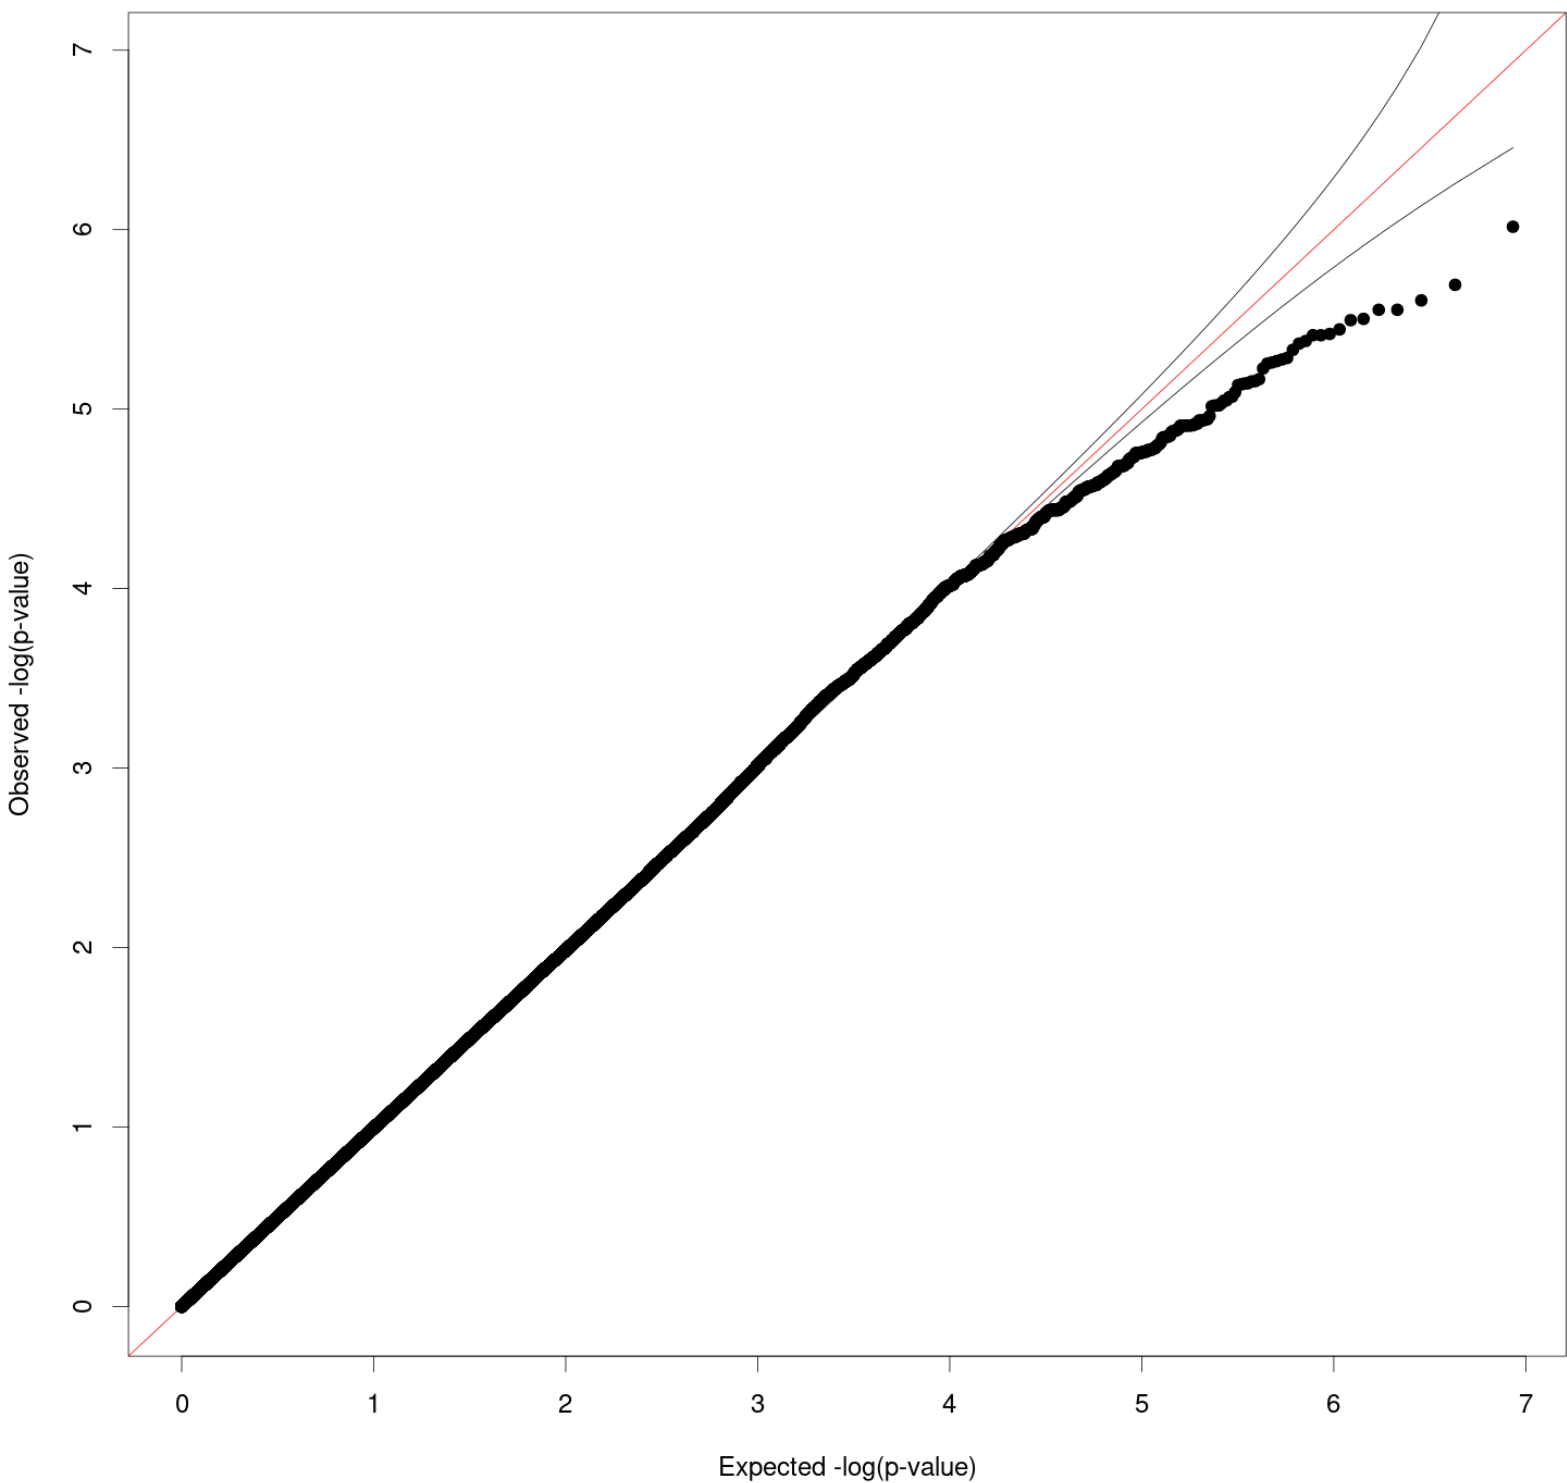

QQ plot for mz173.1044\_t19.5, arginine  
inflation factor = 0.9948

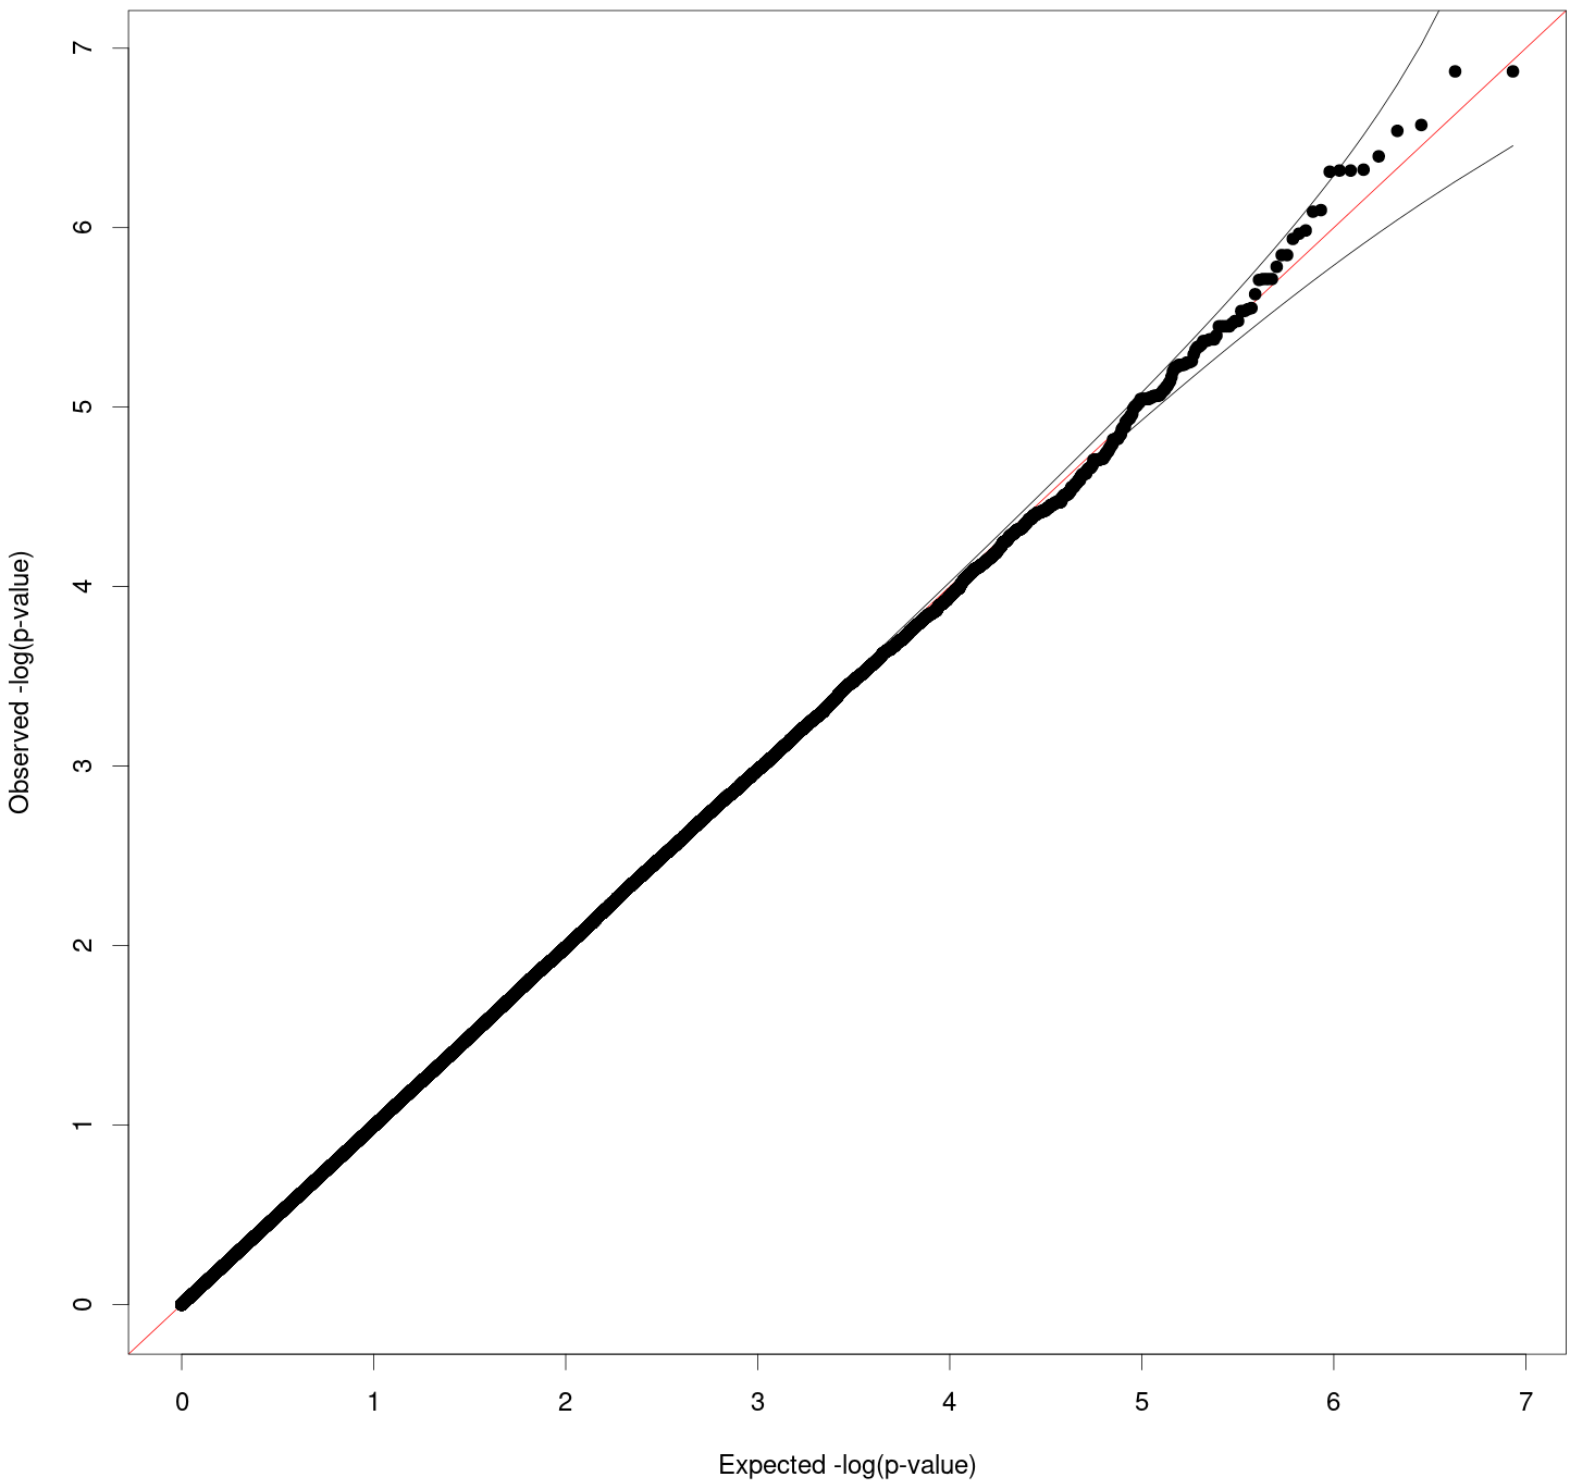

QQ plot for mz174.056\_t47.1, indole-3-acetate  
inflation factor = 0.998

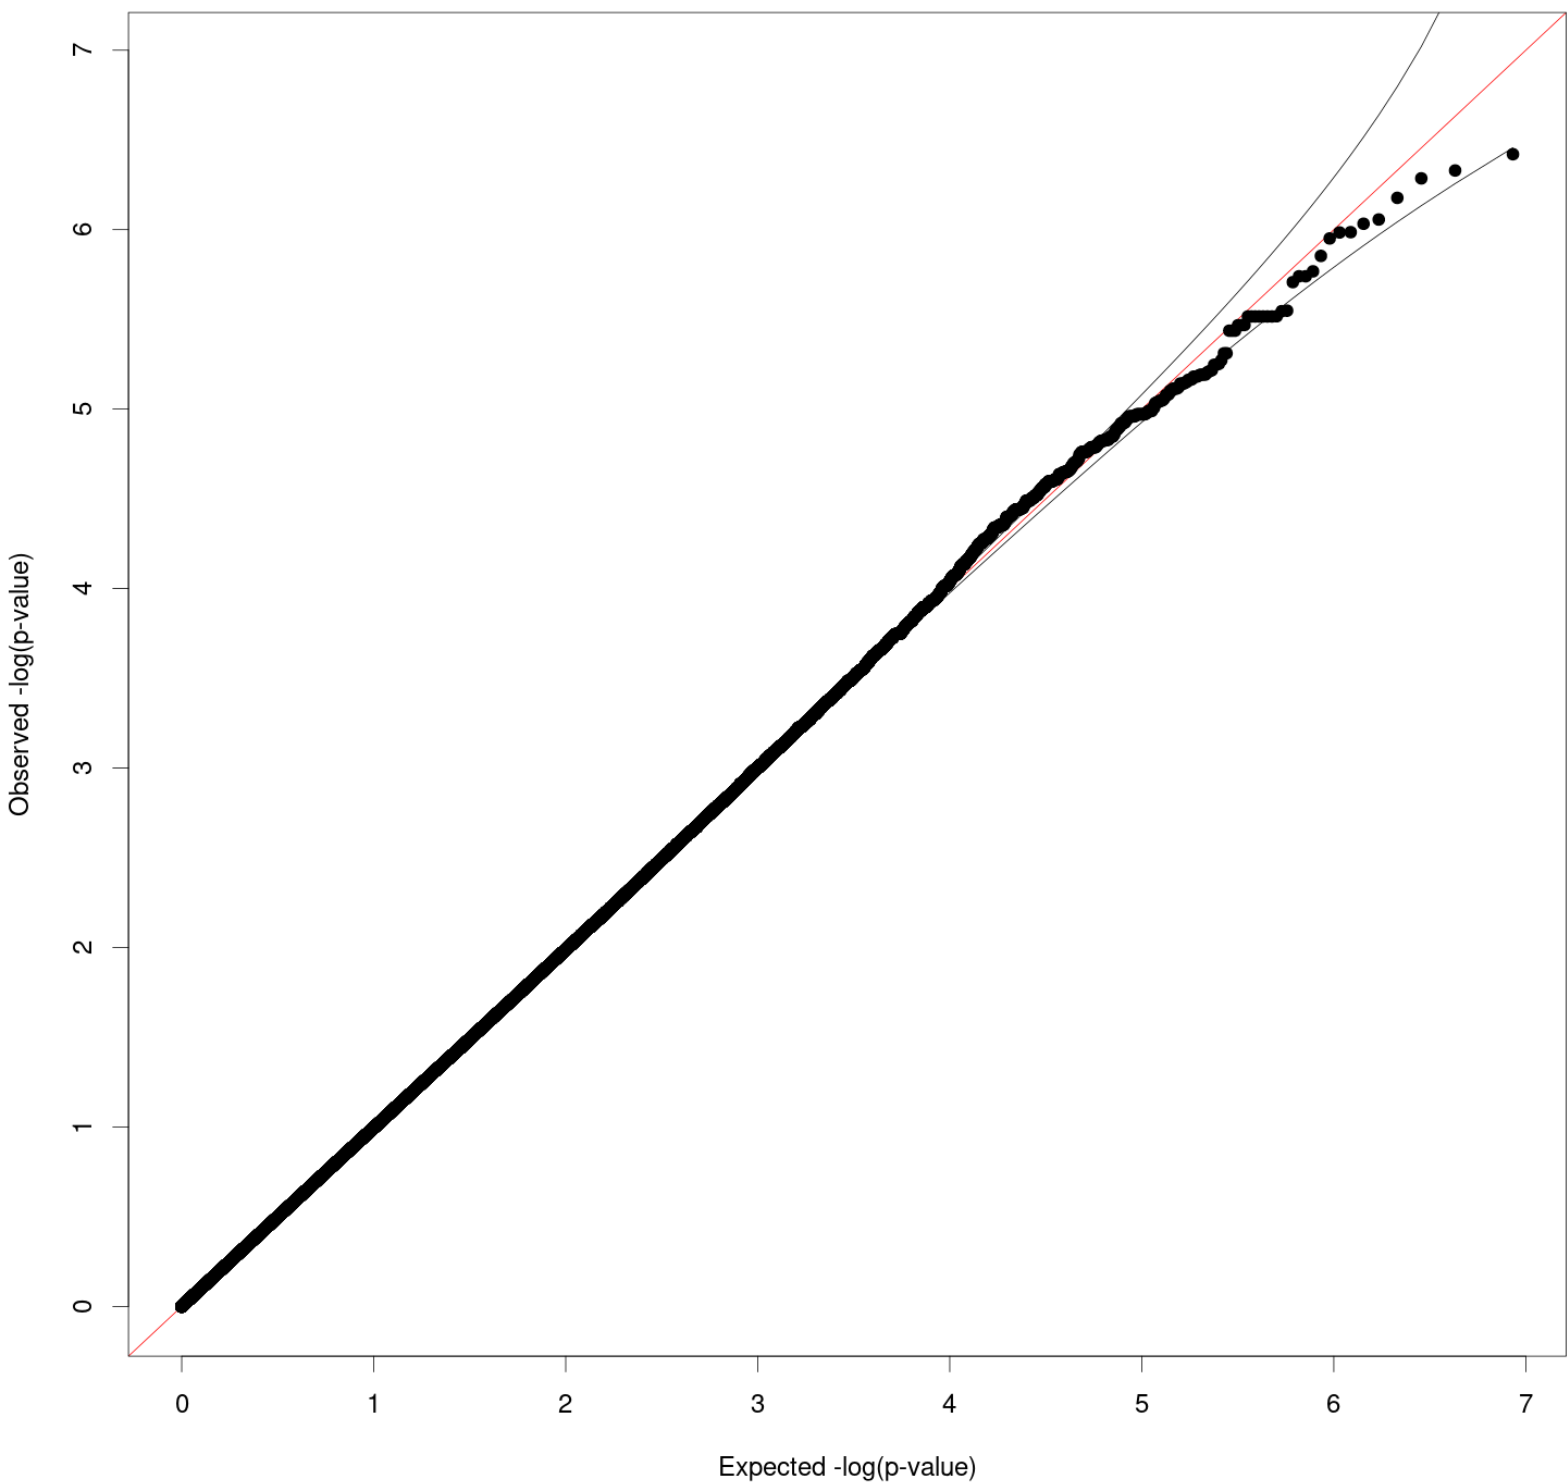

QQ plot for mz174.0884\_t21.1, citrulline  
inflation factor = 1.011

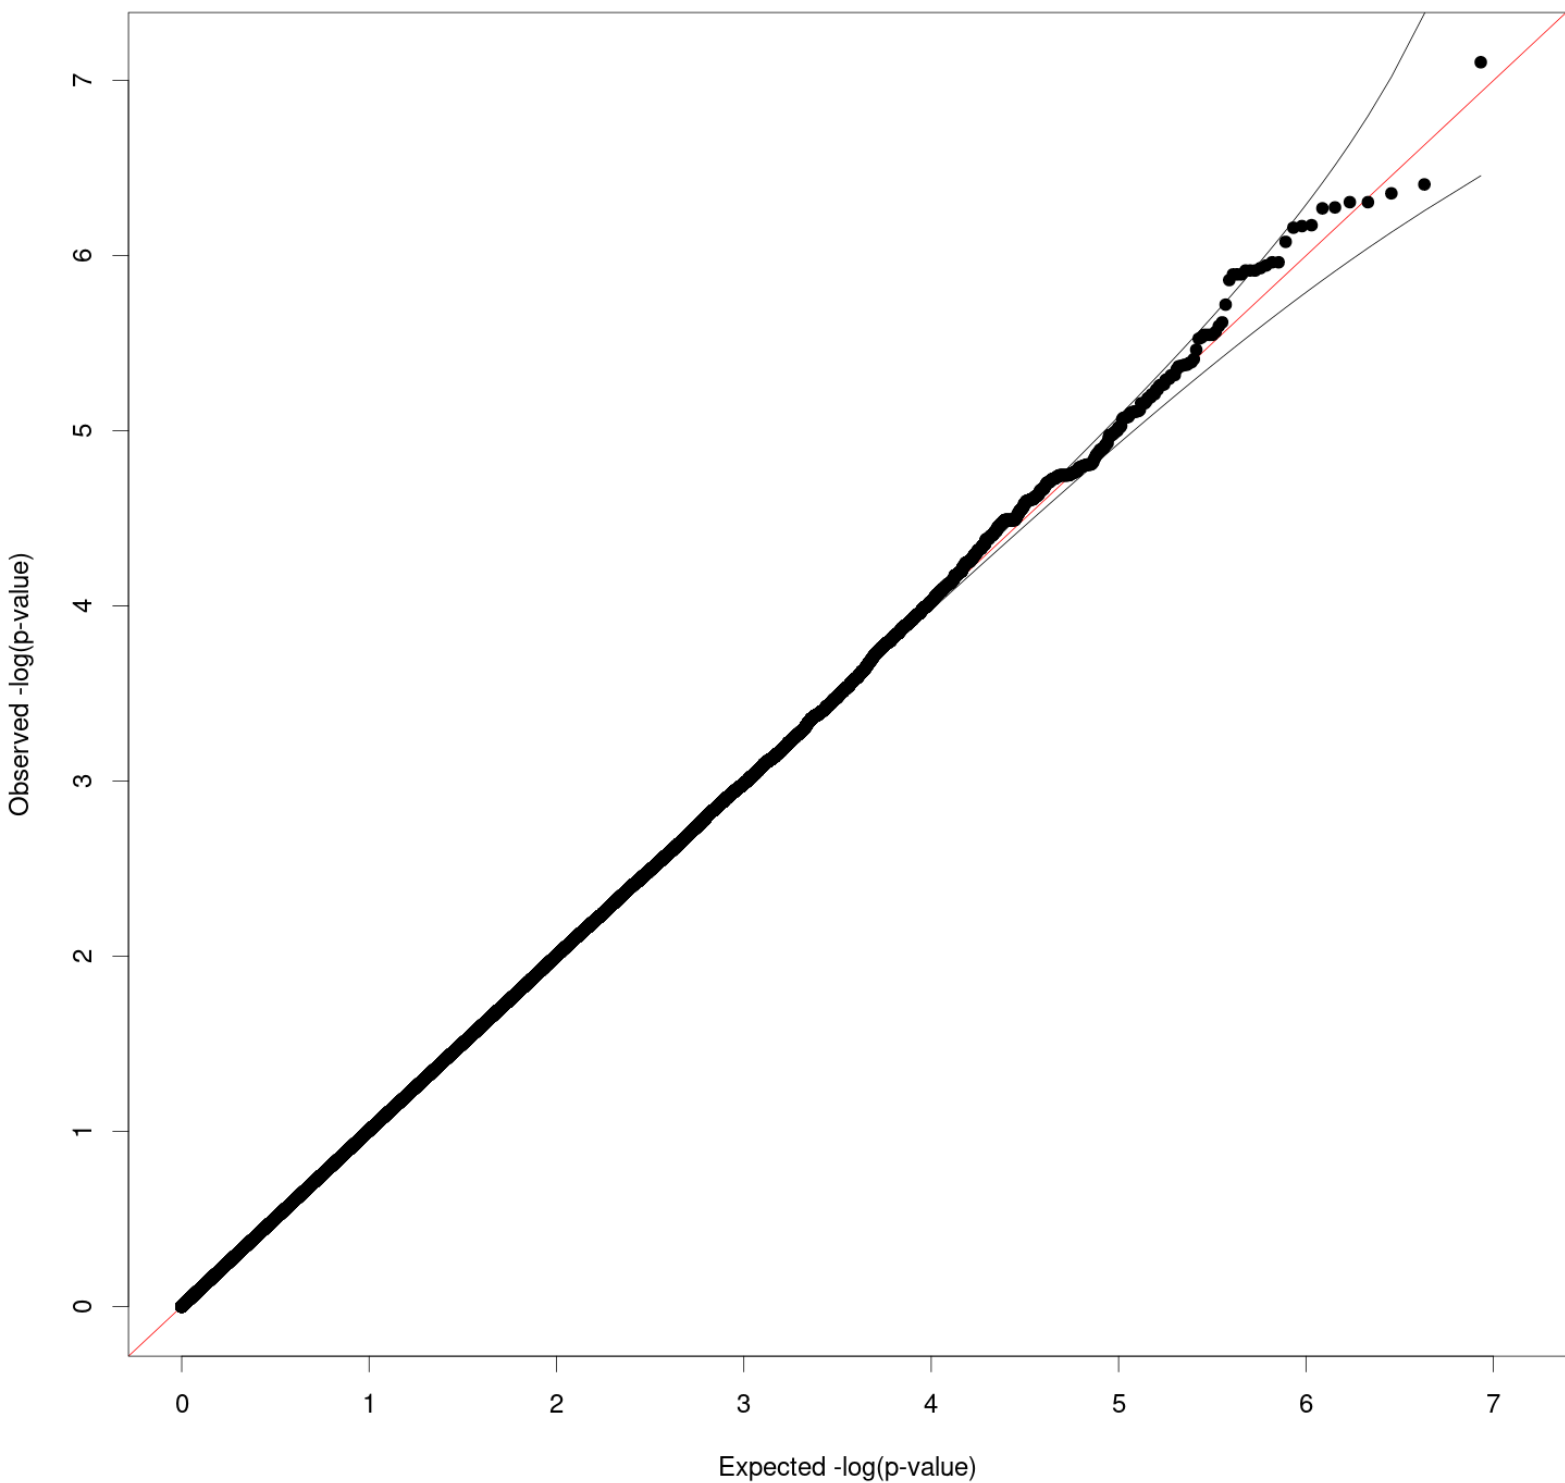

QQ plot for mz175.0866\_t42.7, indole-3-acetamide  
inflation factor = 1.008

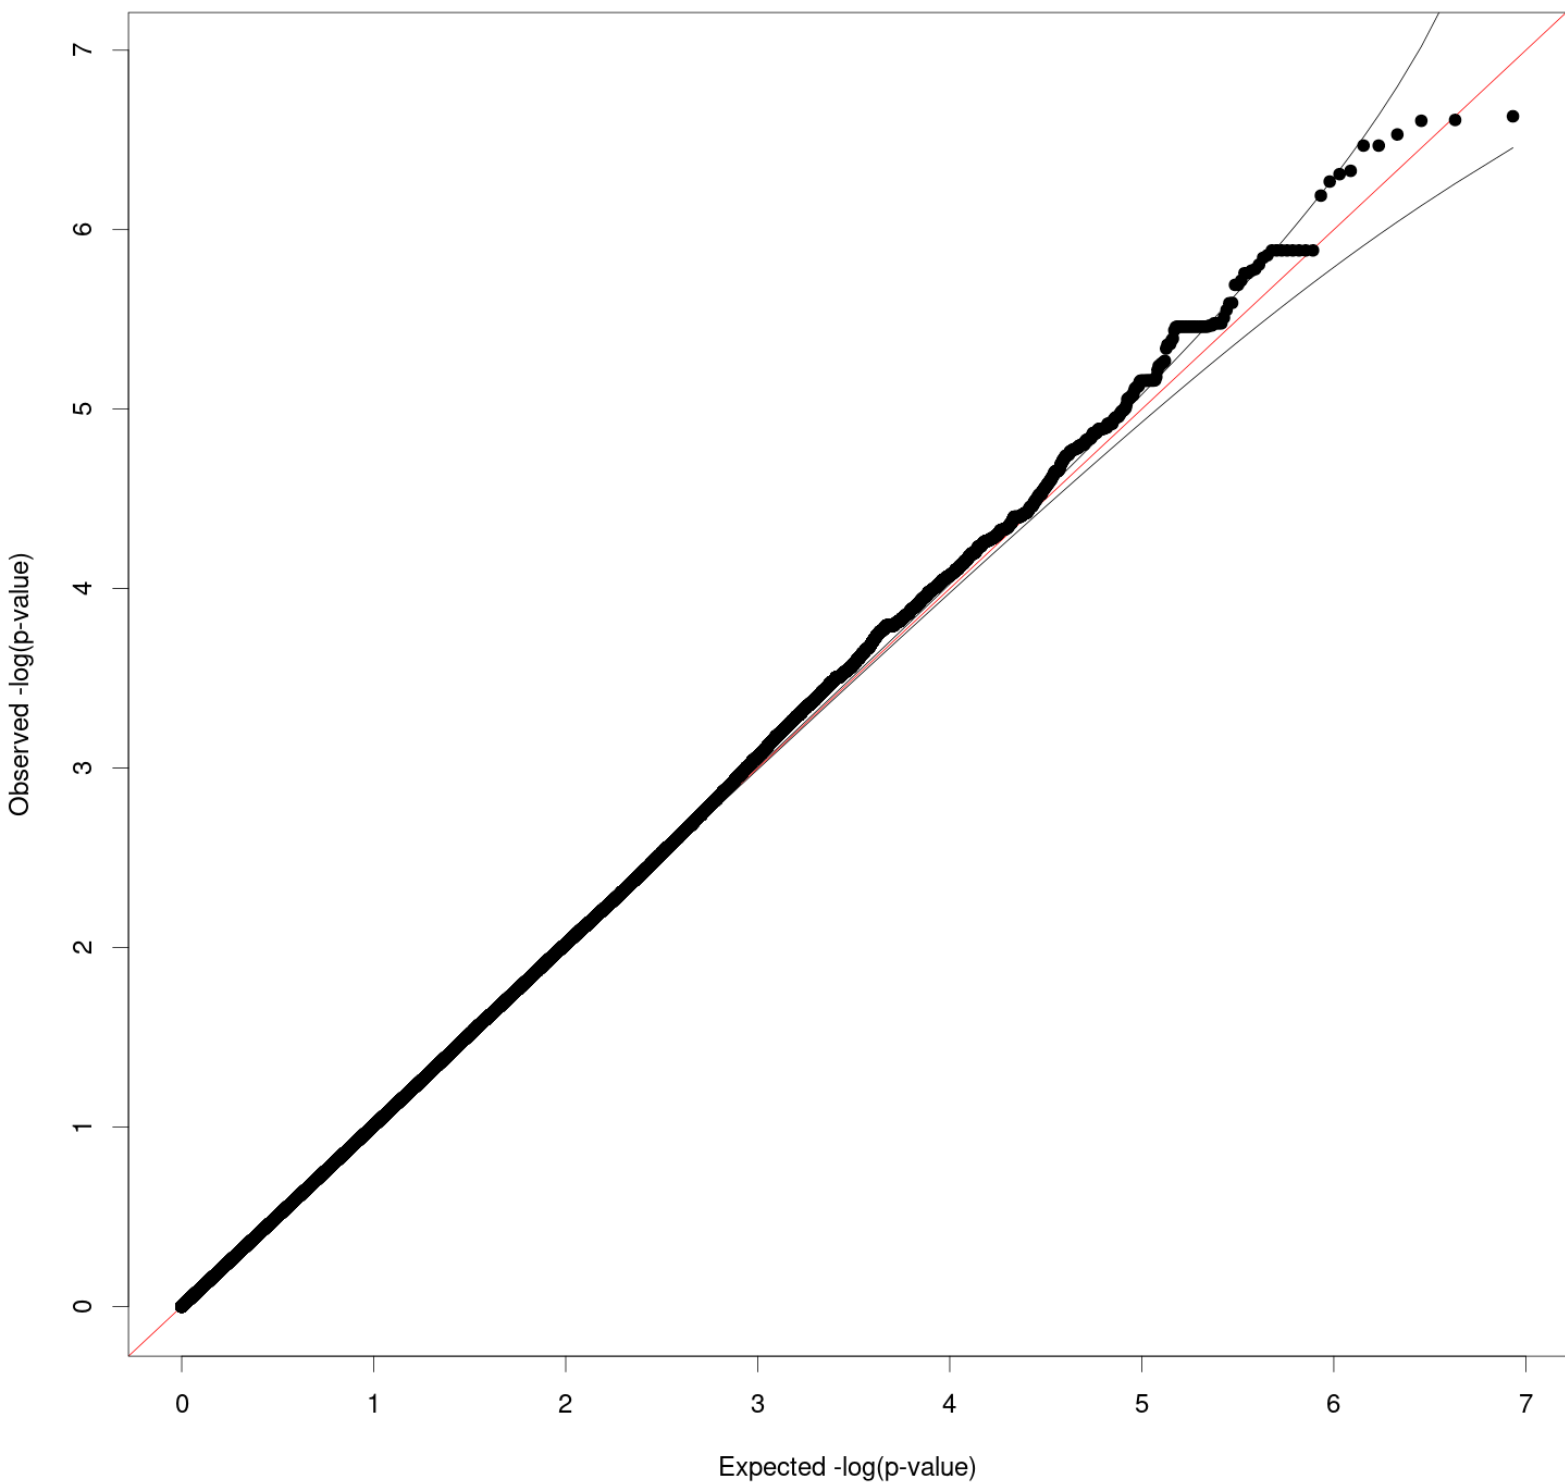

QQ plot for mz176.0388\_t26.6, formyl-l-methionyl peptide  
inflation factor = 0.9961

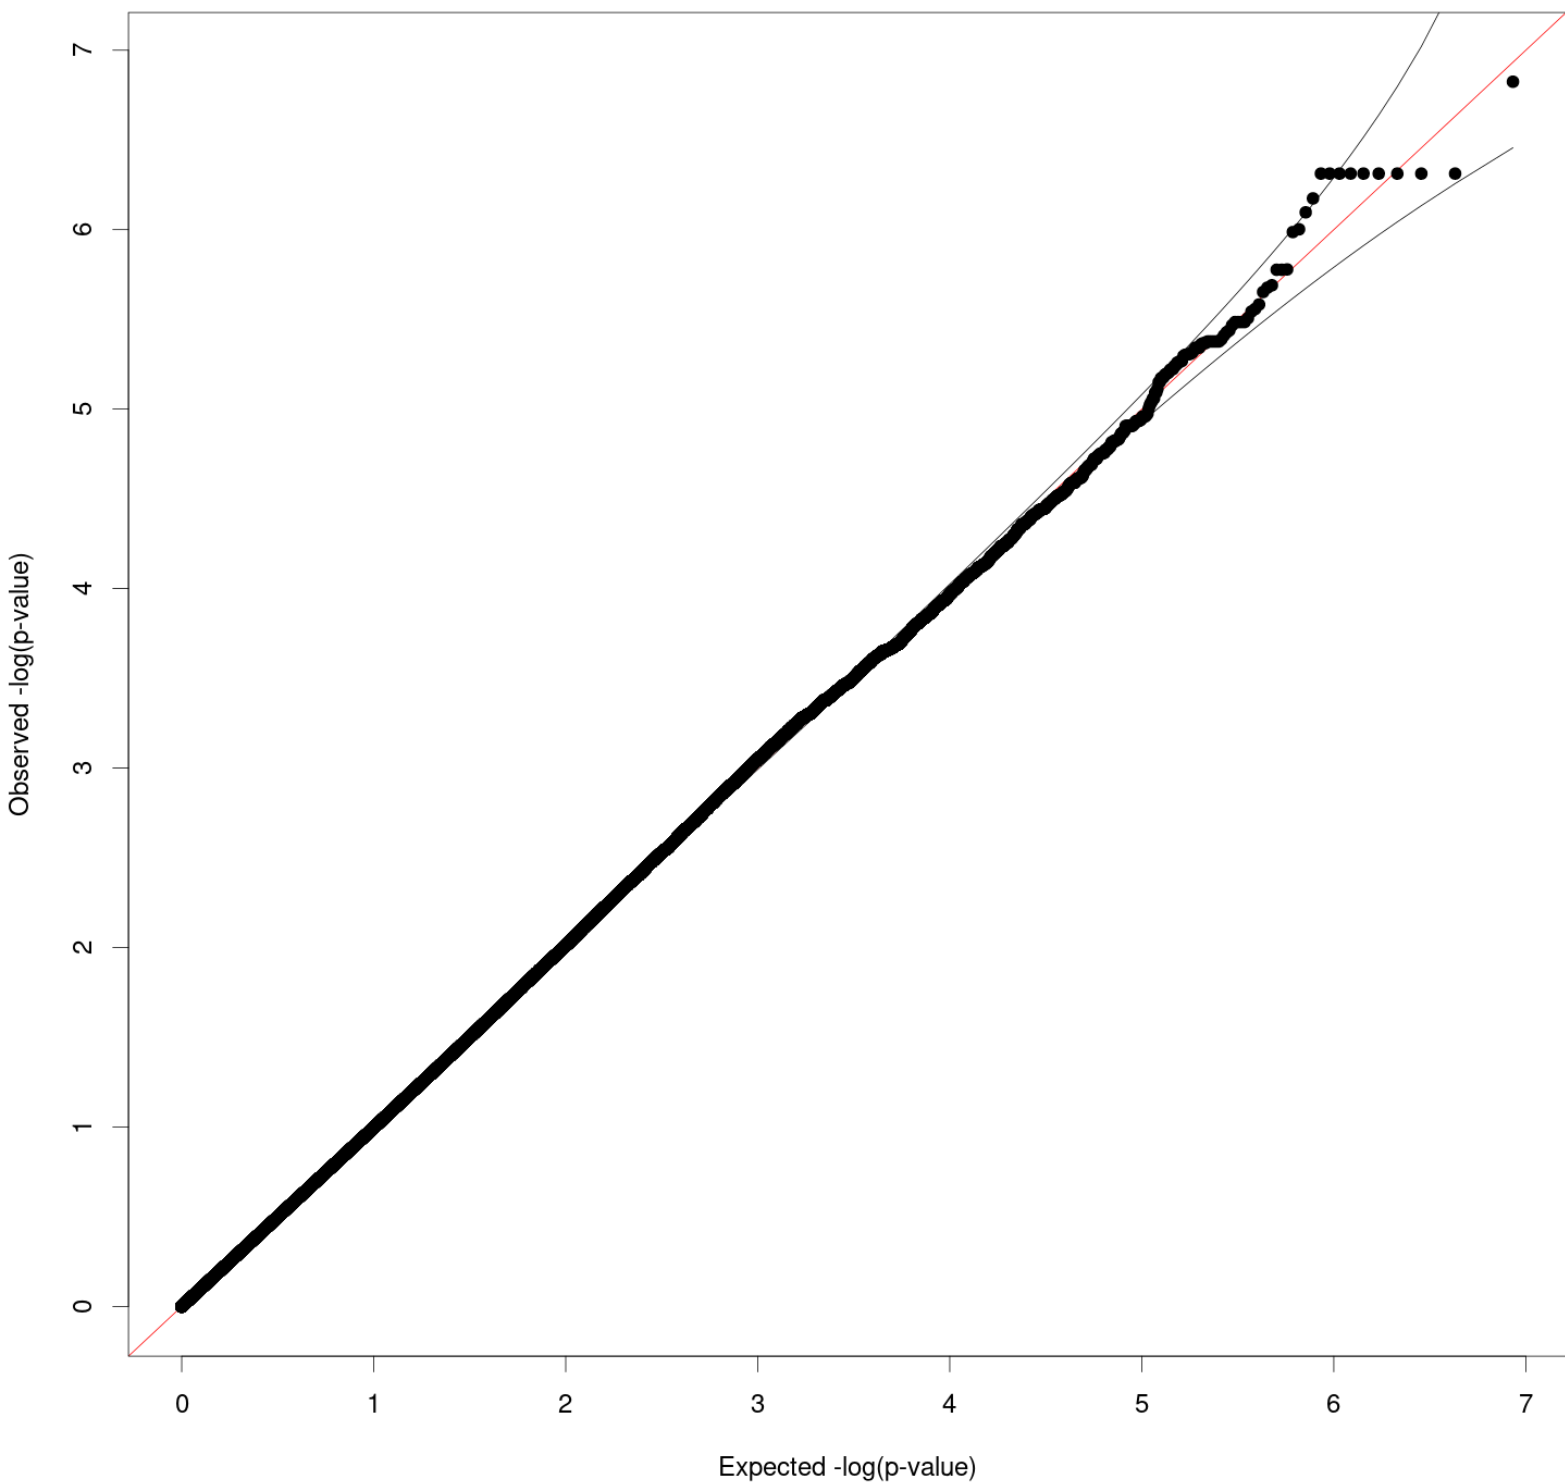



QQ plot for mz176.0663\_t49, n-amidino-l-aspartate  
inflation factor = 0.9997

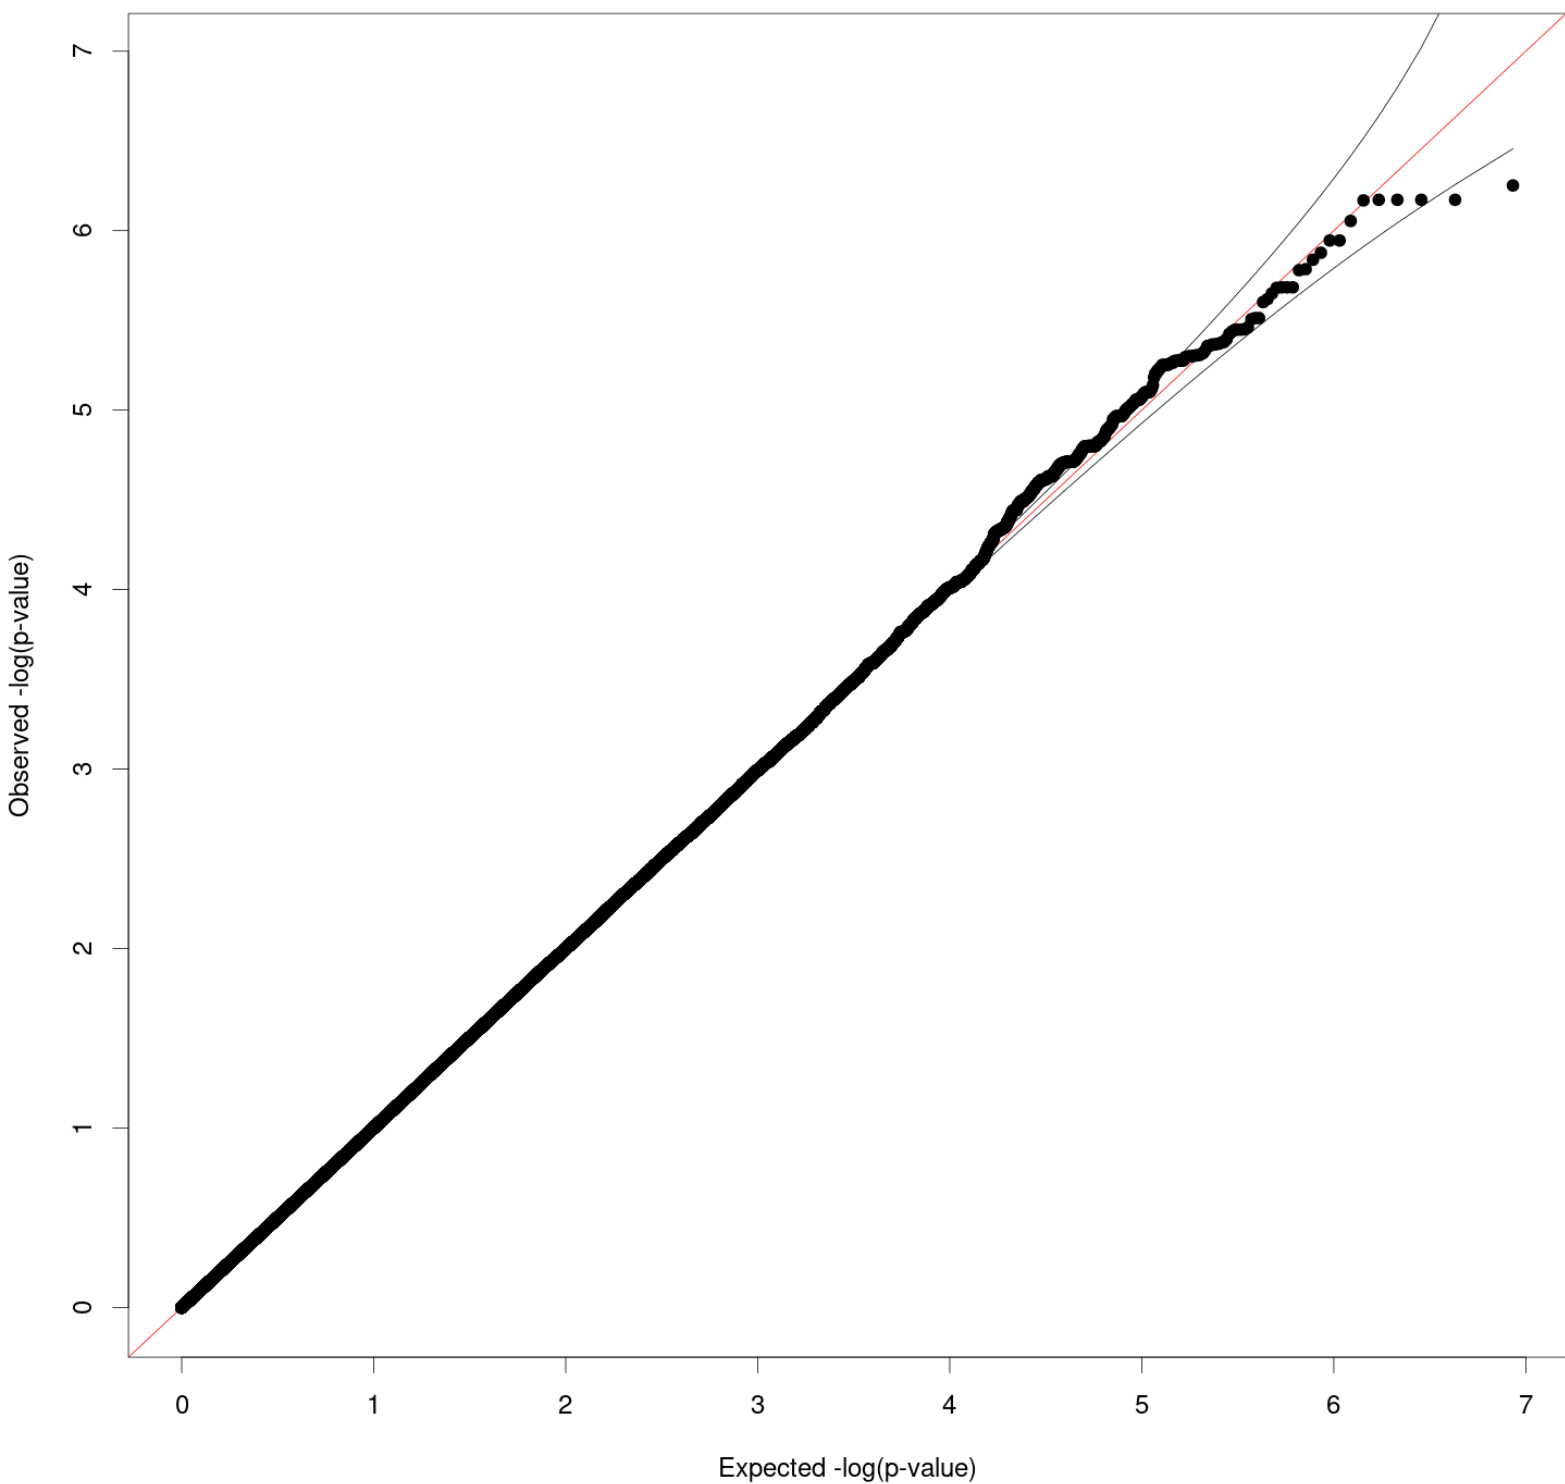

QQ plot for mz176.1029\_t90.6, citrulline  
inflation factor = 0.9956

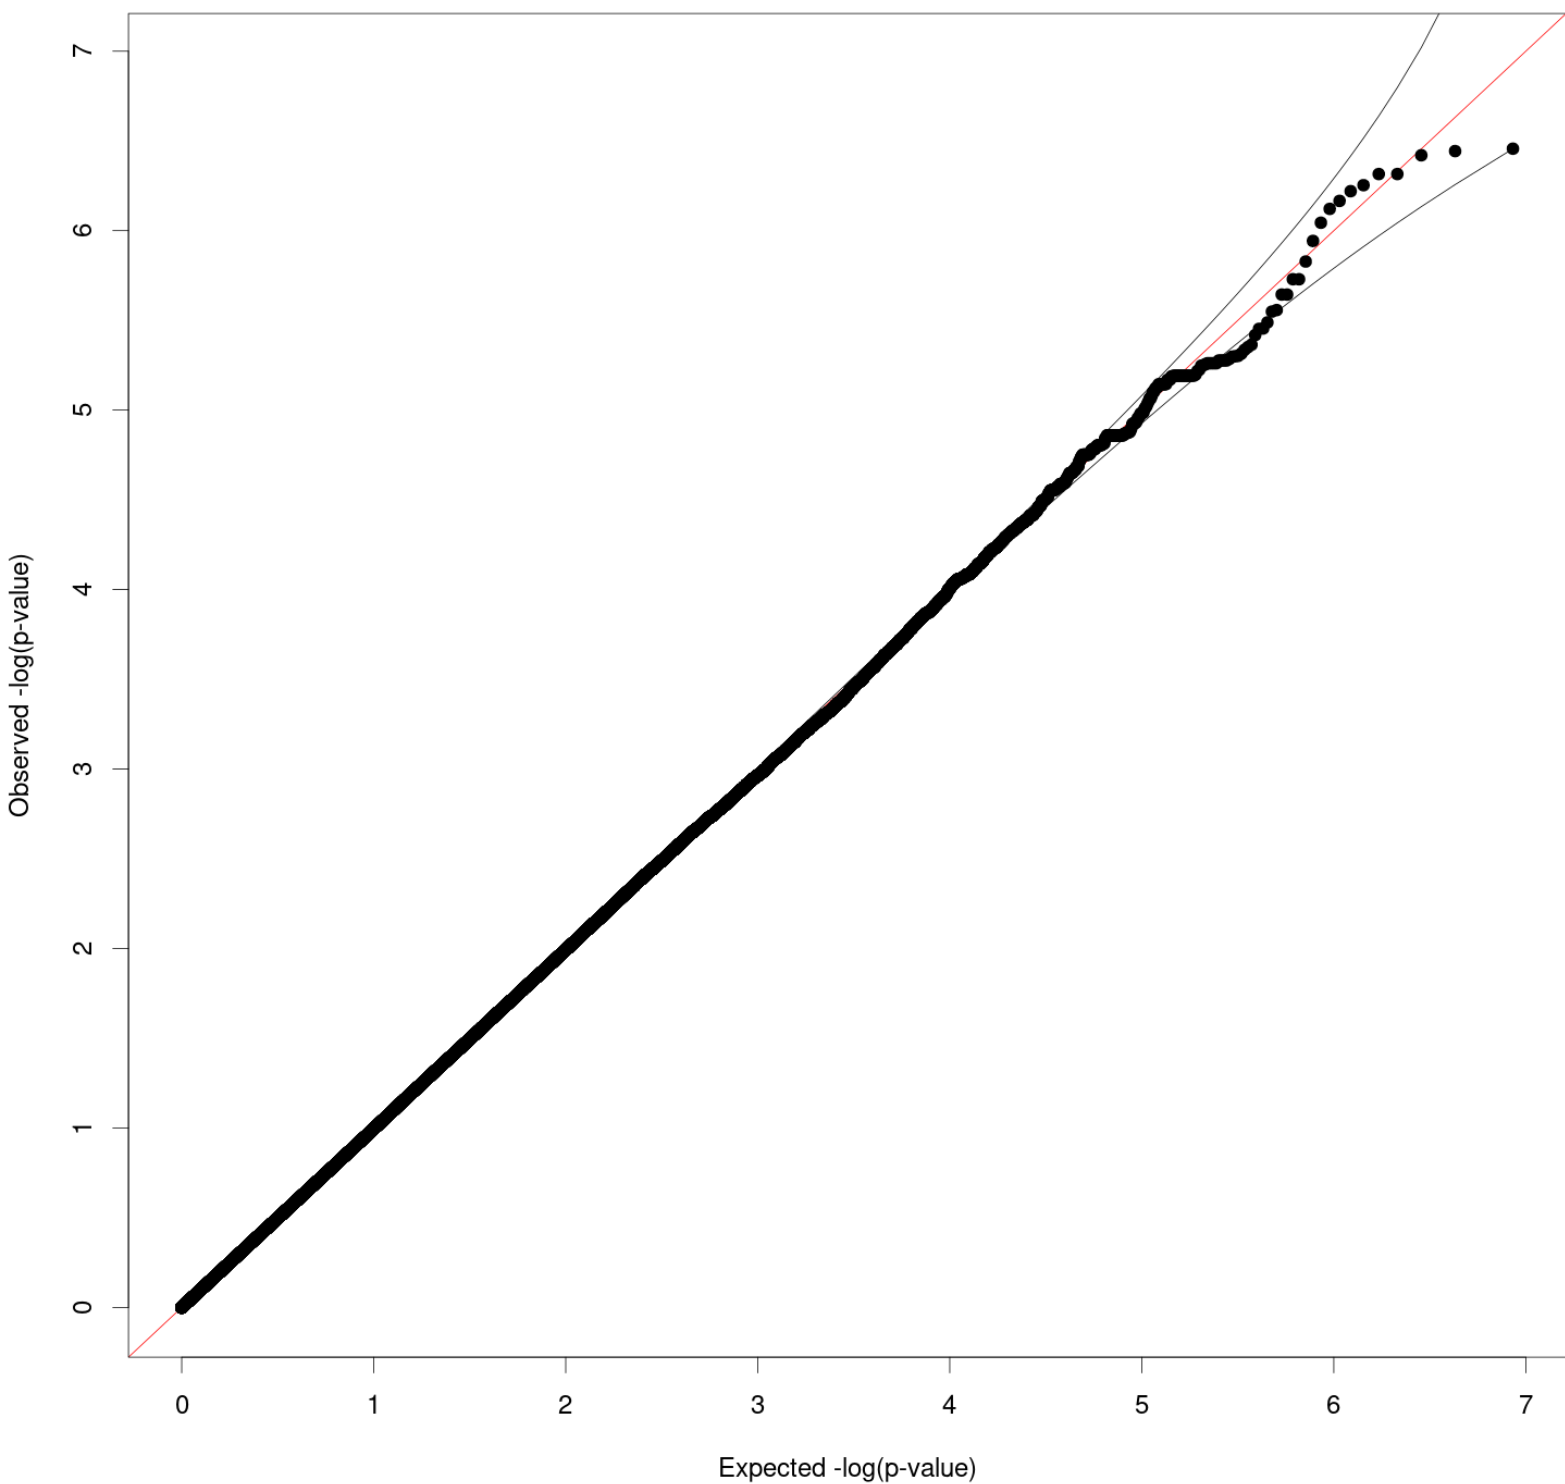

QQ plot for mz177.0405\_t19.7, d-gulonic acid gama-lactone  
inflation factor = 0.9999

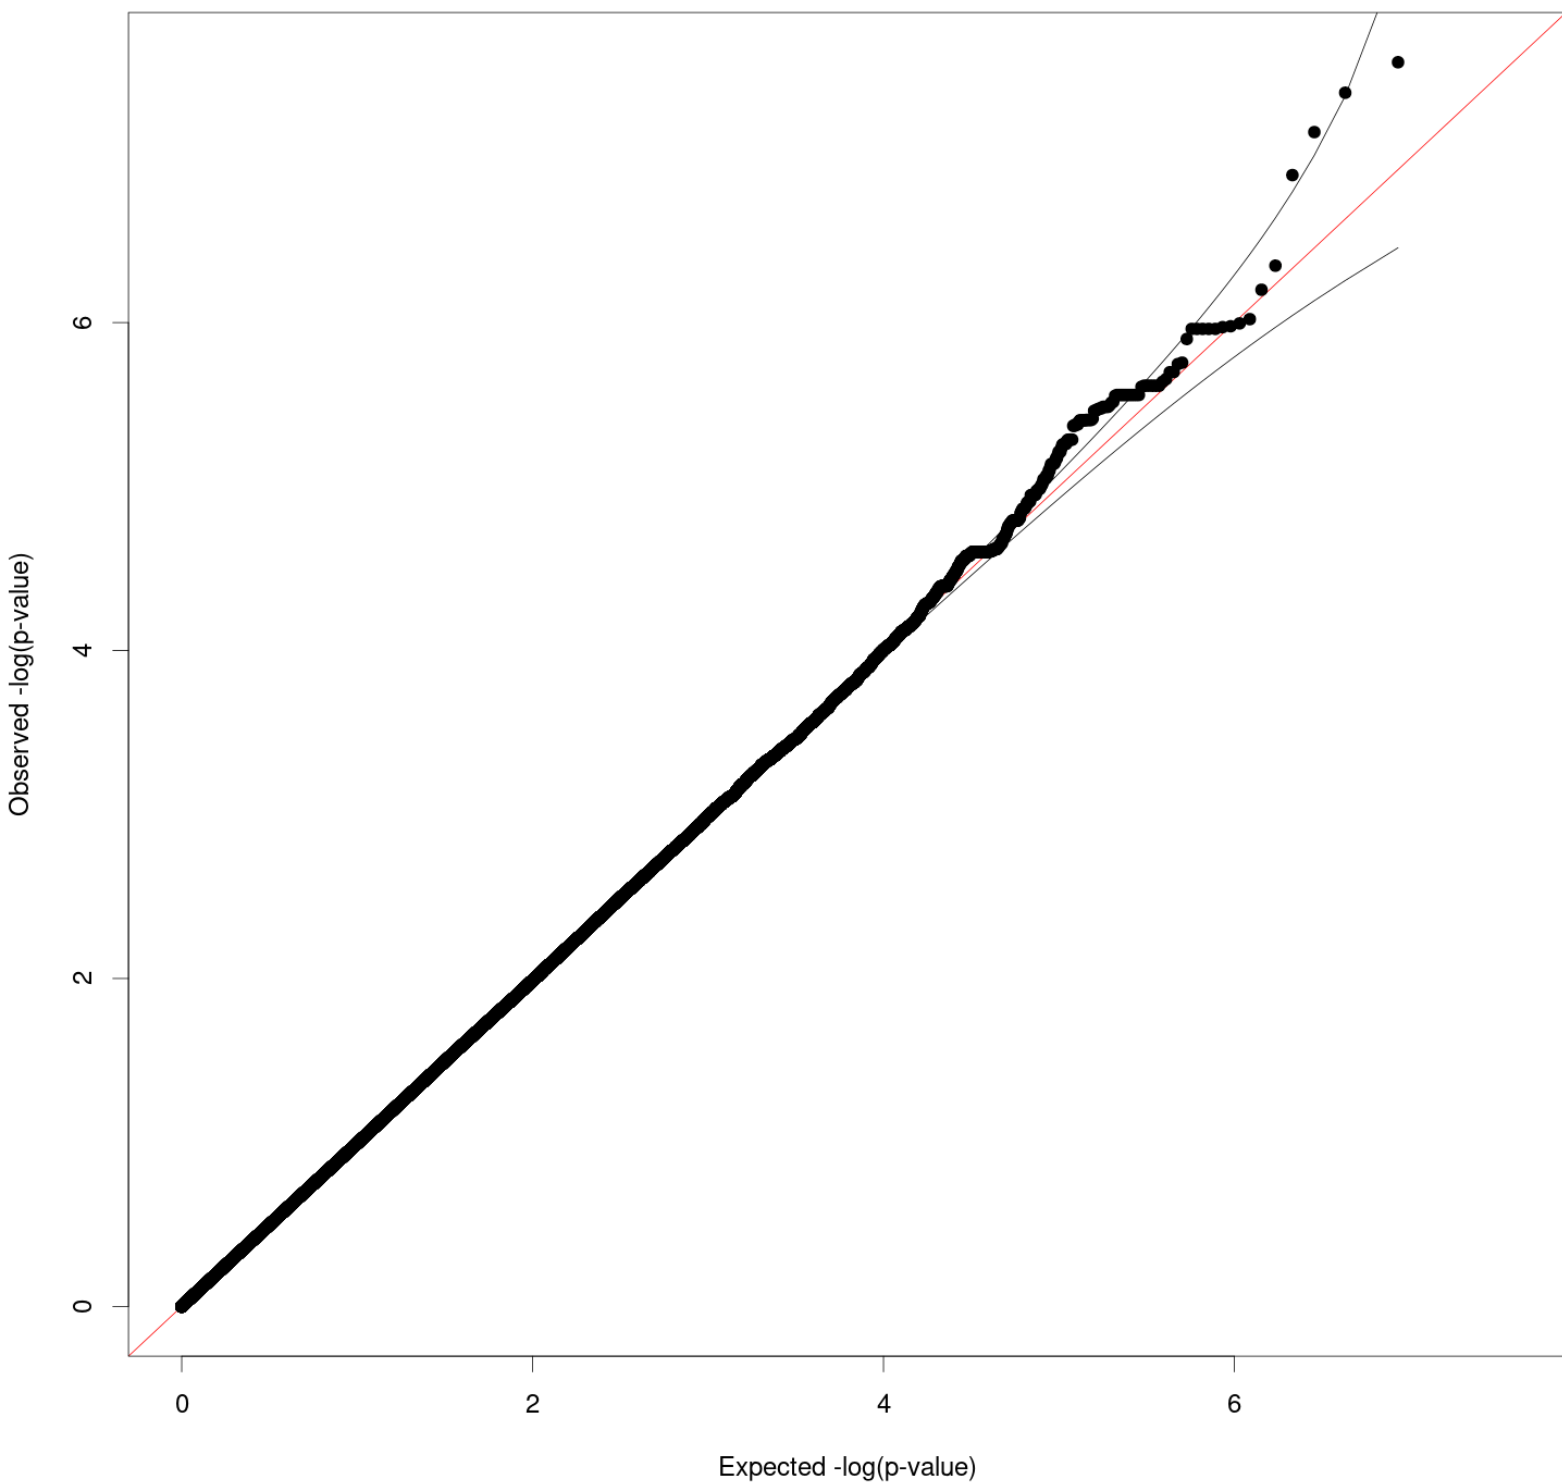

QQ plot for mz178.051\_t30.3, hippurate  
inflation factor = 0.9994

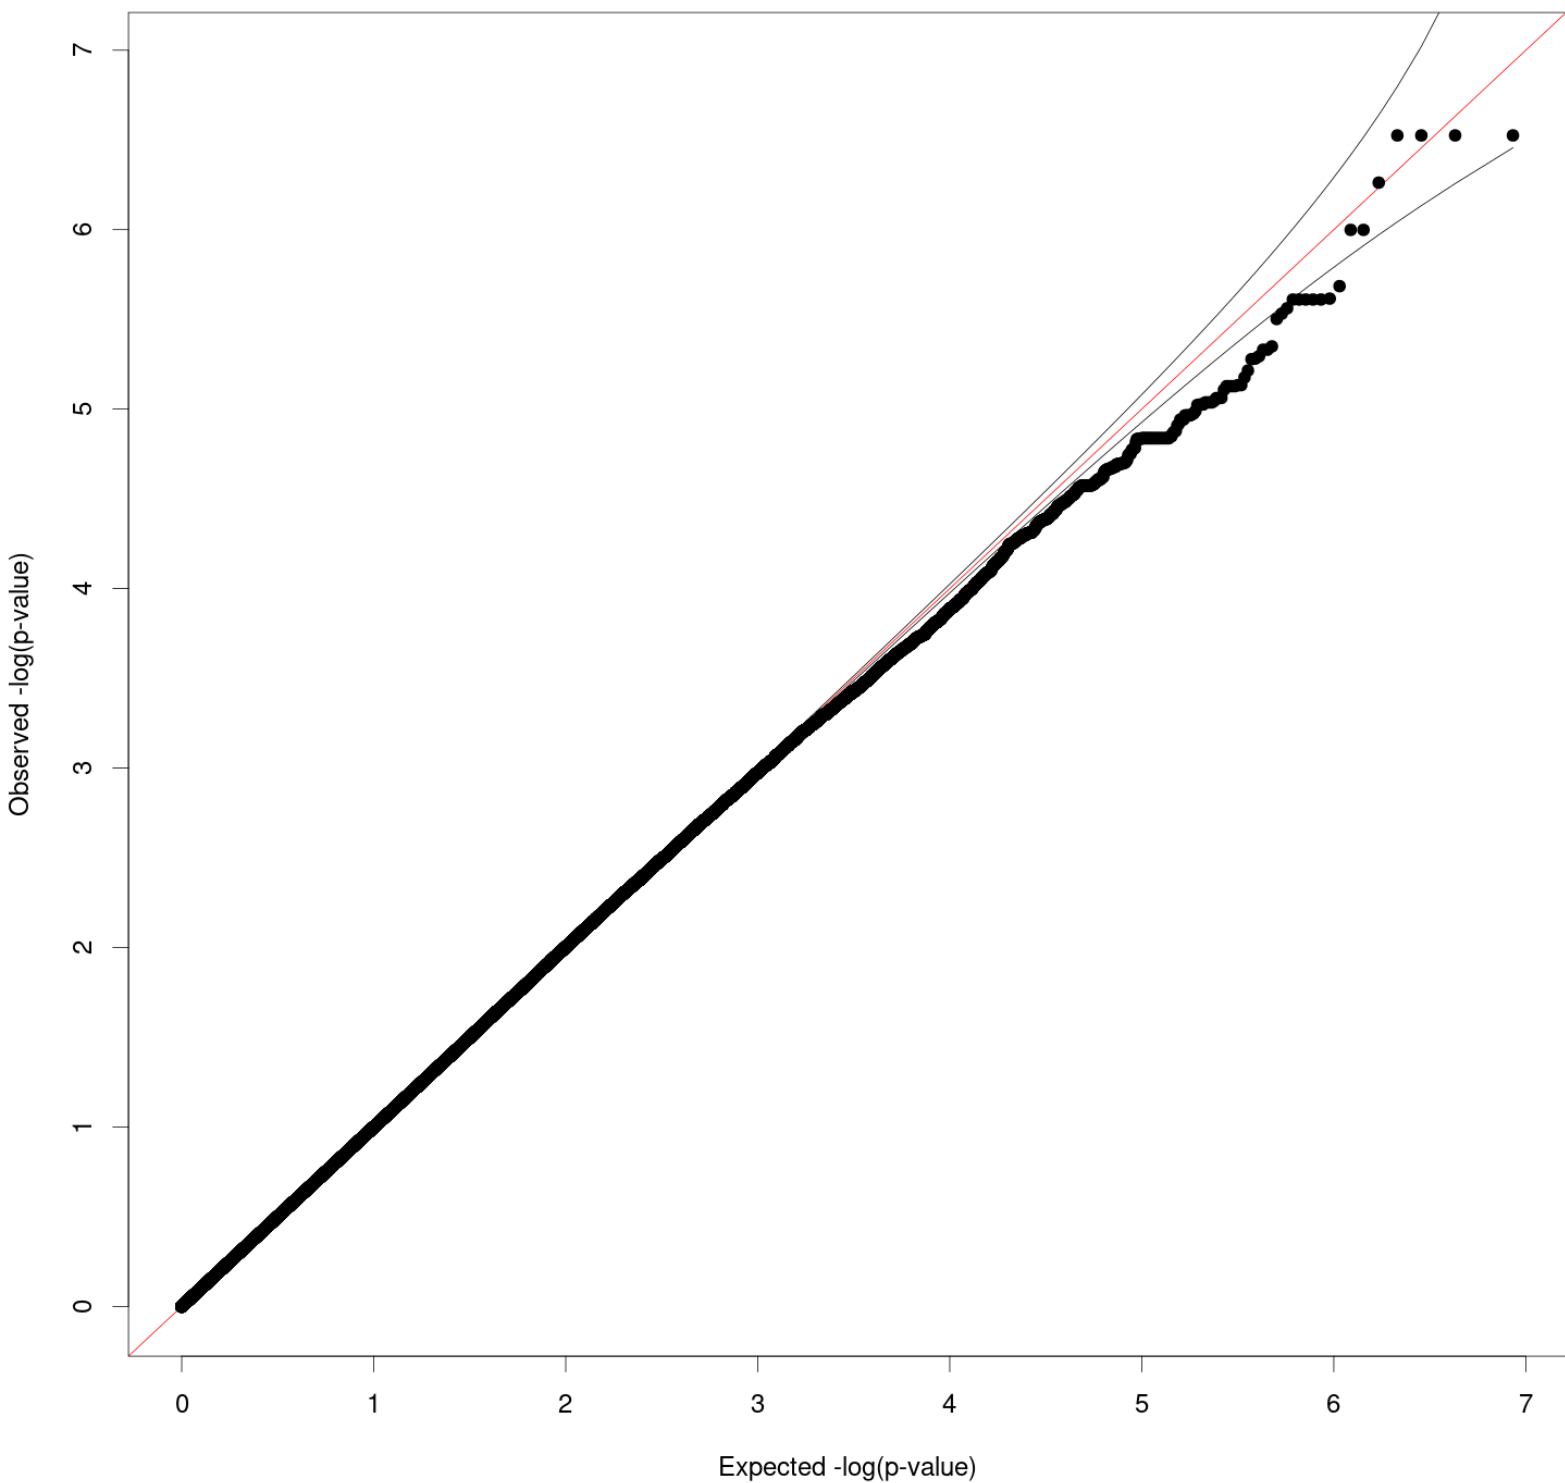

QQ plot for mz178.0533\_t51.9, formyl-l-methionyl peptide  
inflation factor = 0.997

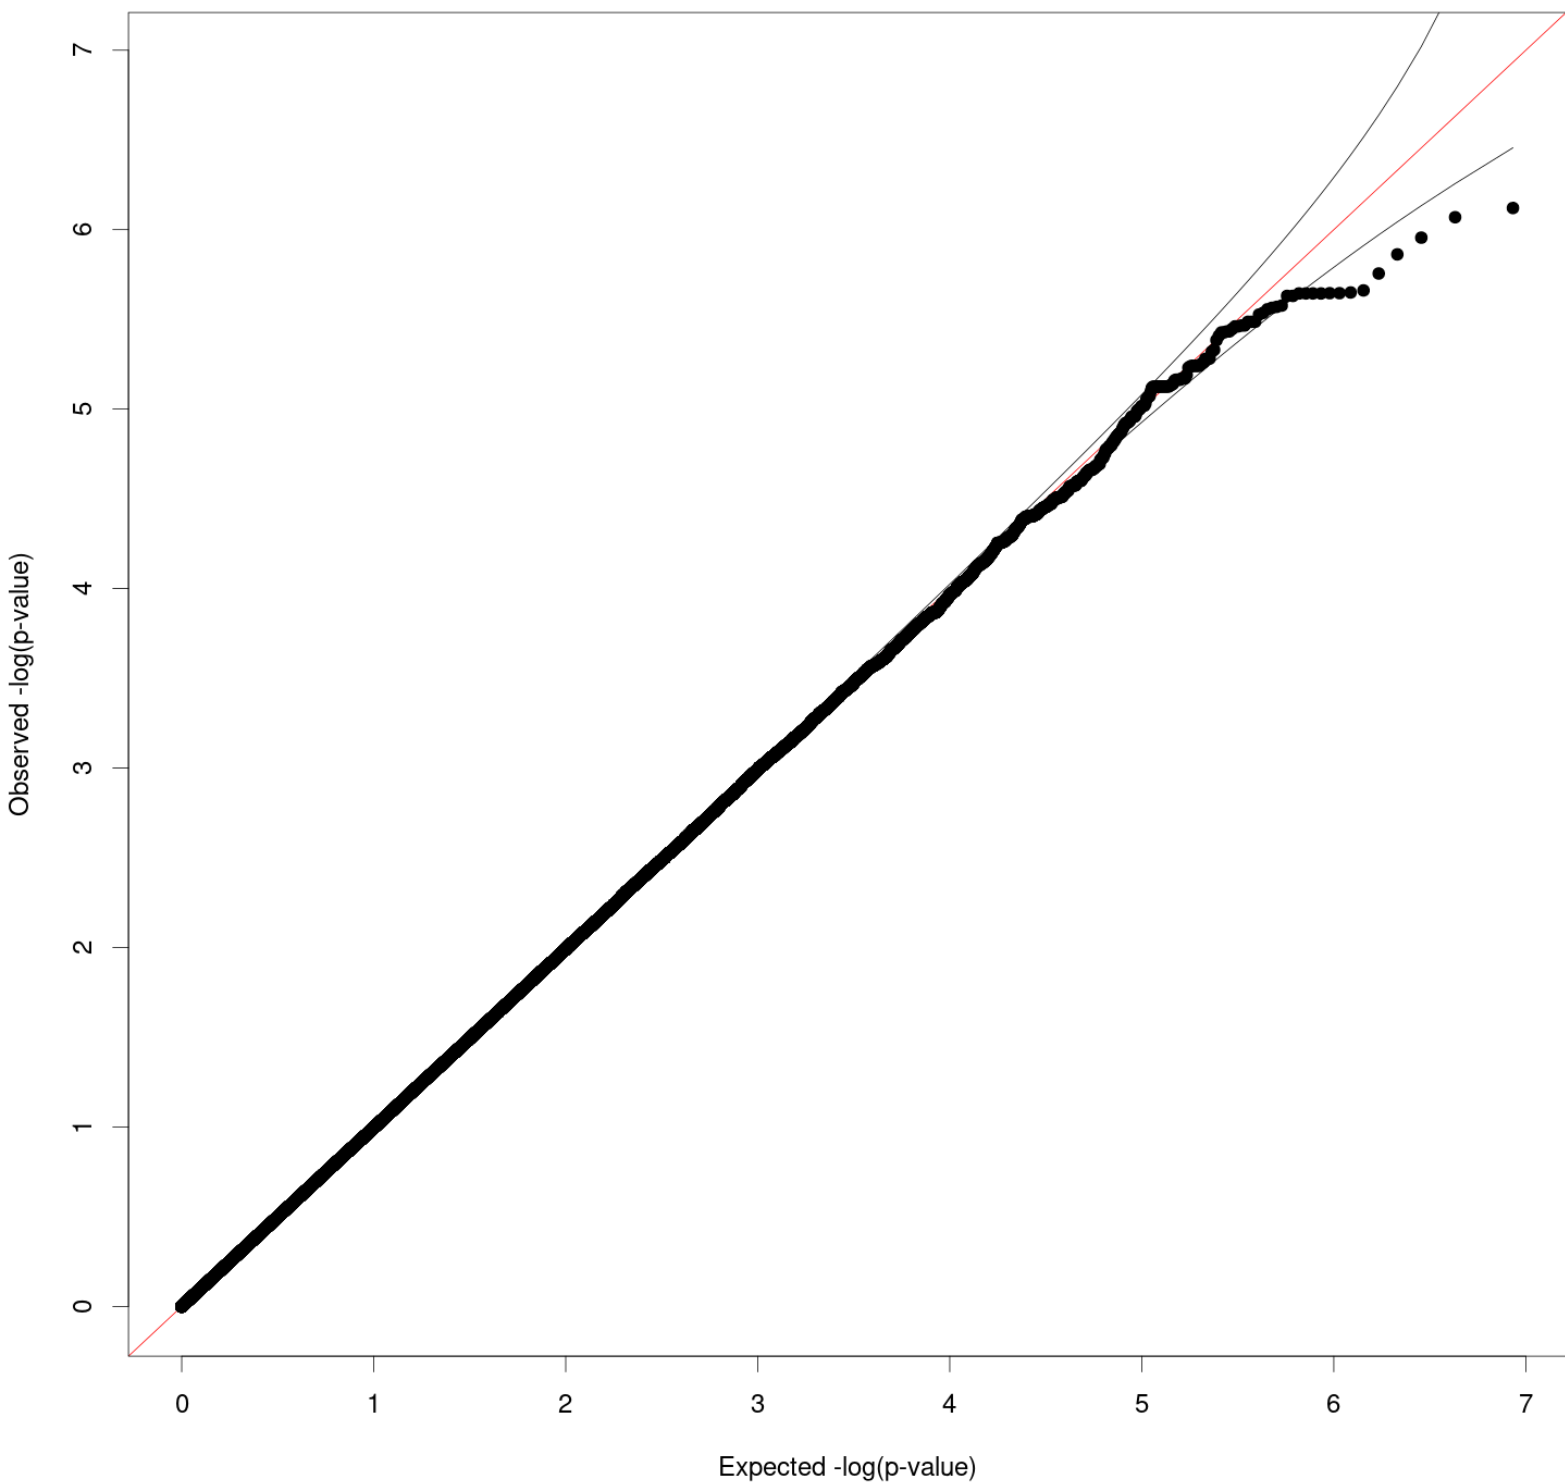

QQ plot for mz179.035\_t25.5, caffeate  
inflation factor = 0.9938

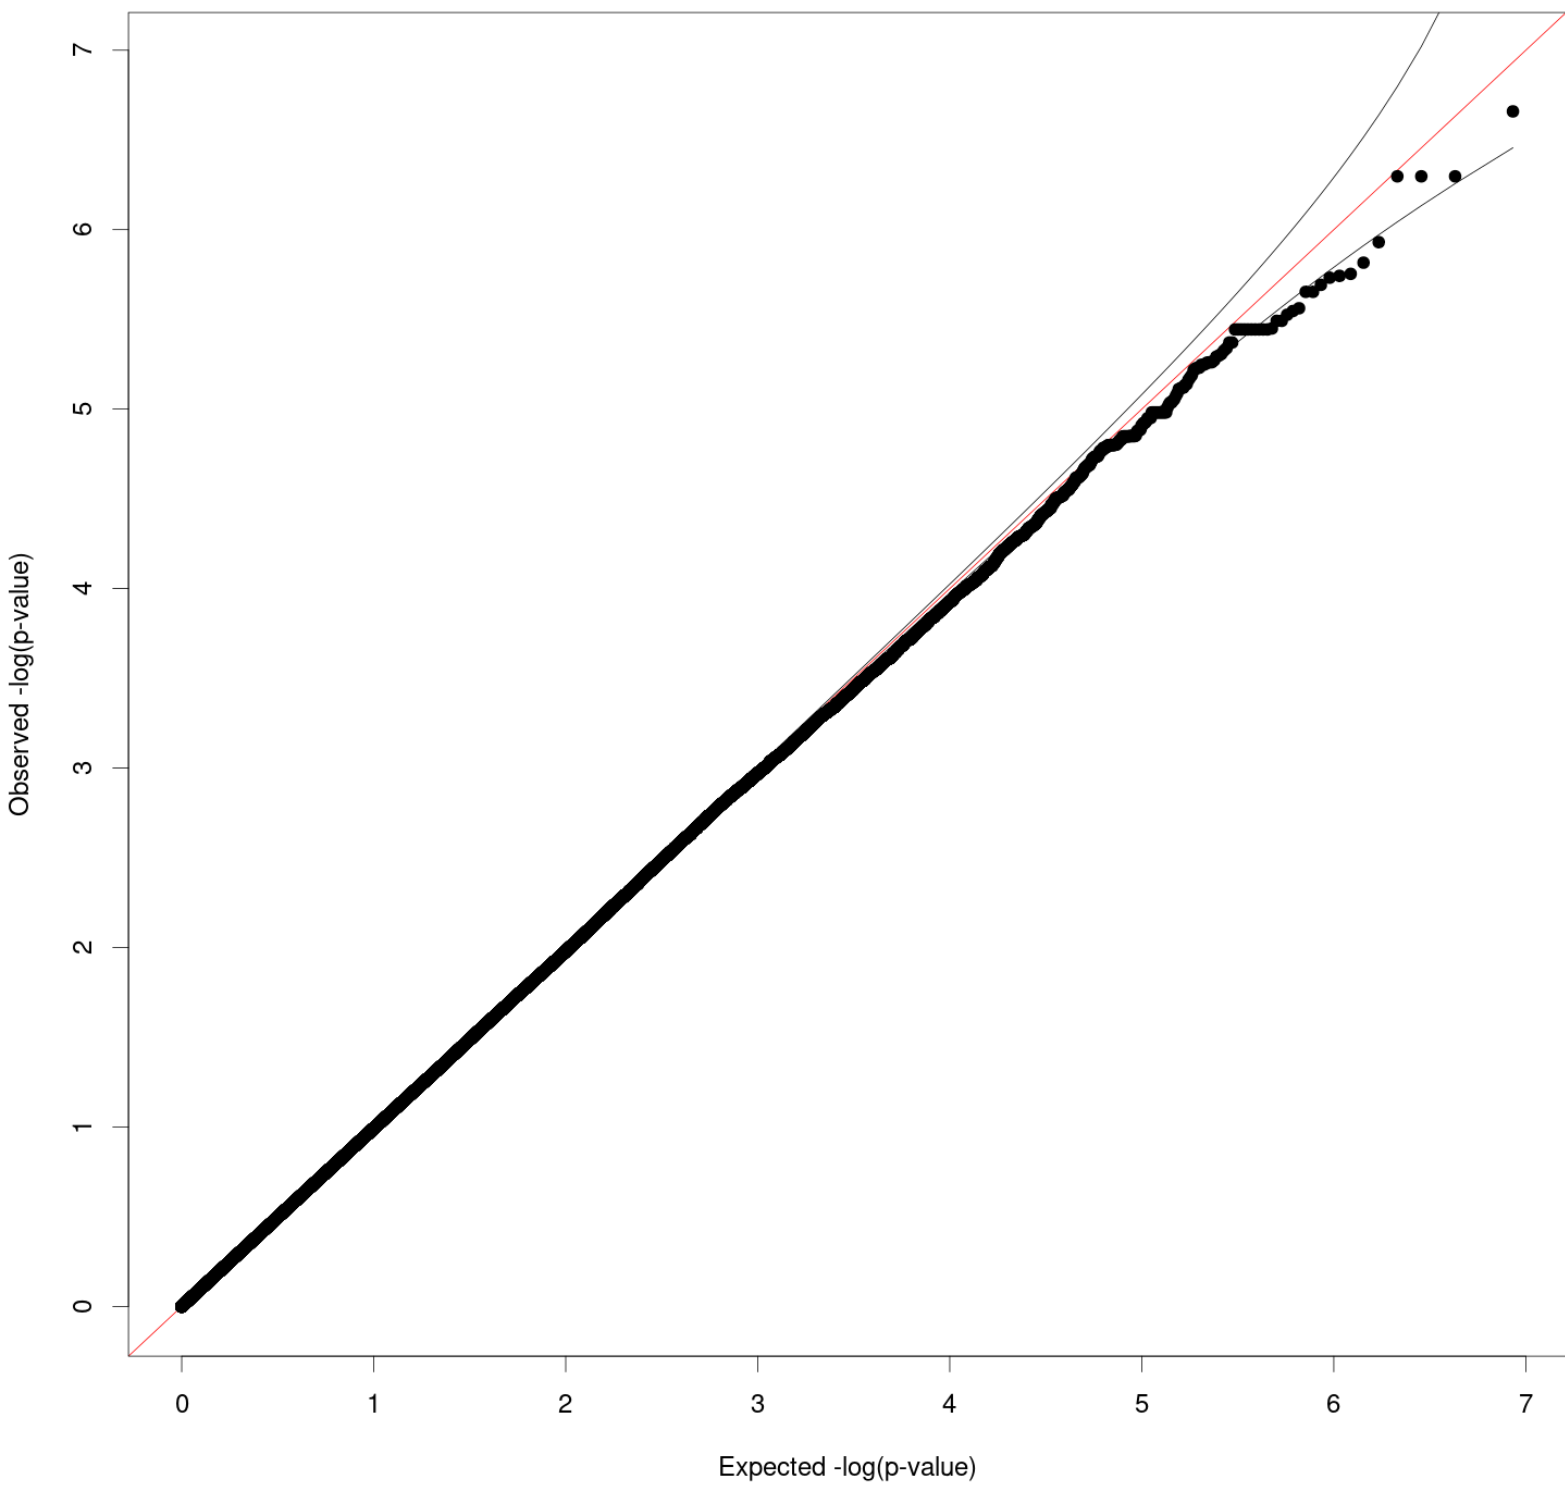

QQ plot for mz180.0329\_t57.5, s-carboxymethyl-l-cysteine  
inflation factor = 0.9968

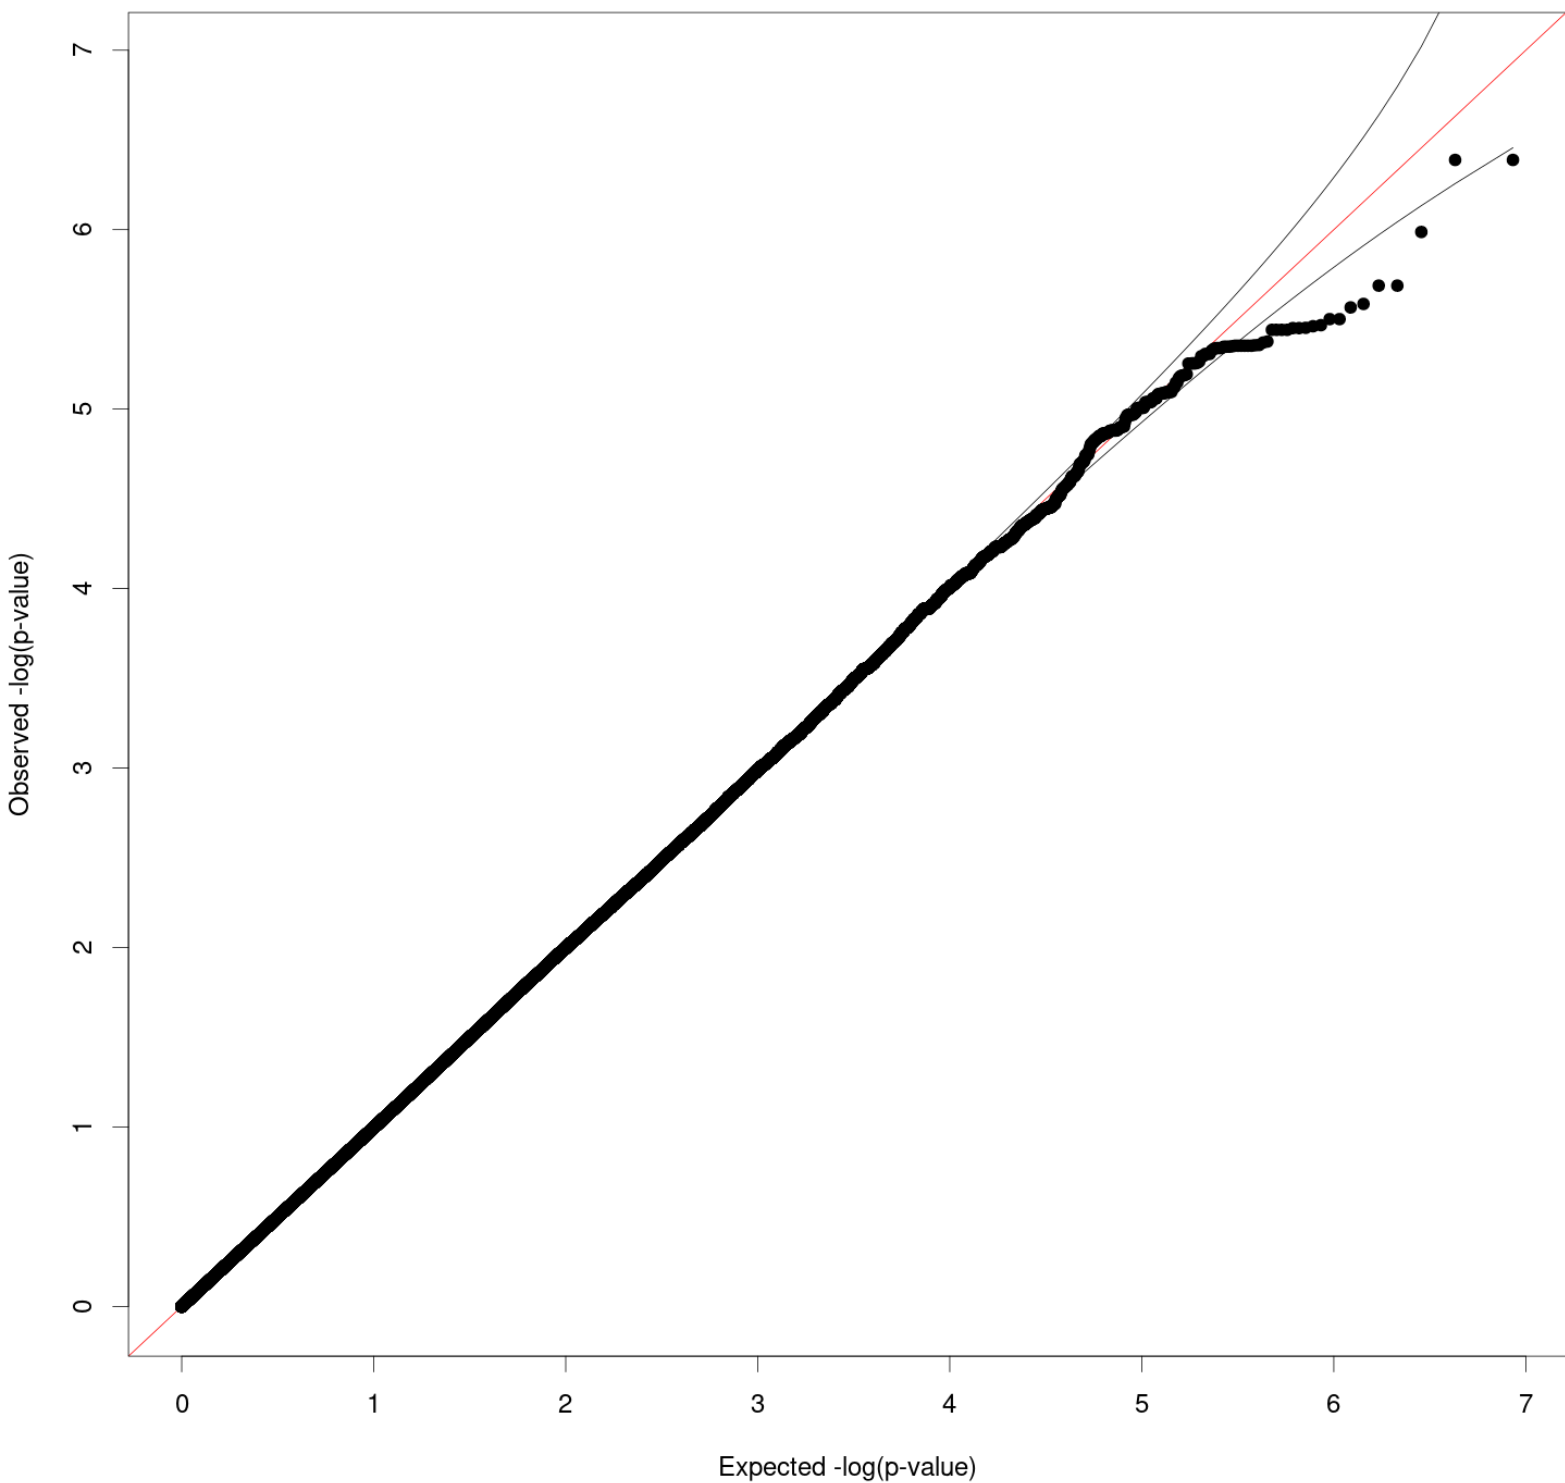

QQ plot for mz180.1019\_t47.4, 1-methyl-6,7-dihydroxy-1,2,3,4-tetrahydroisoquinoline  
inflation factor = 1

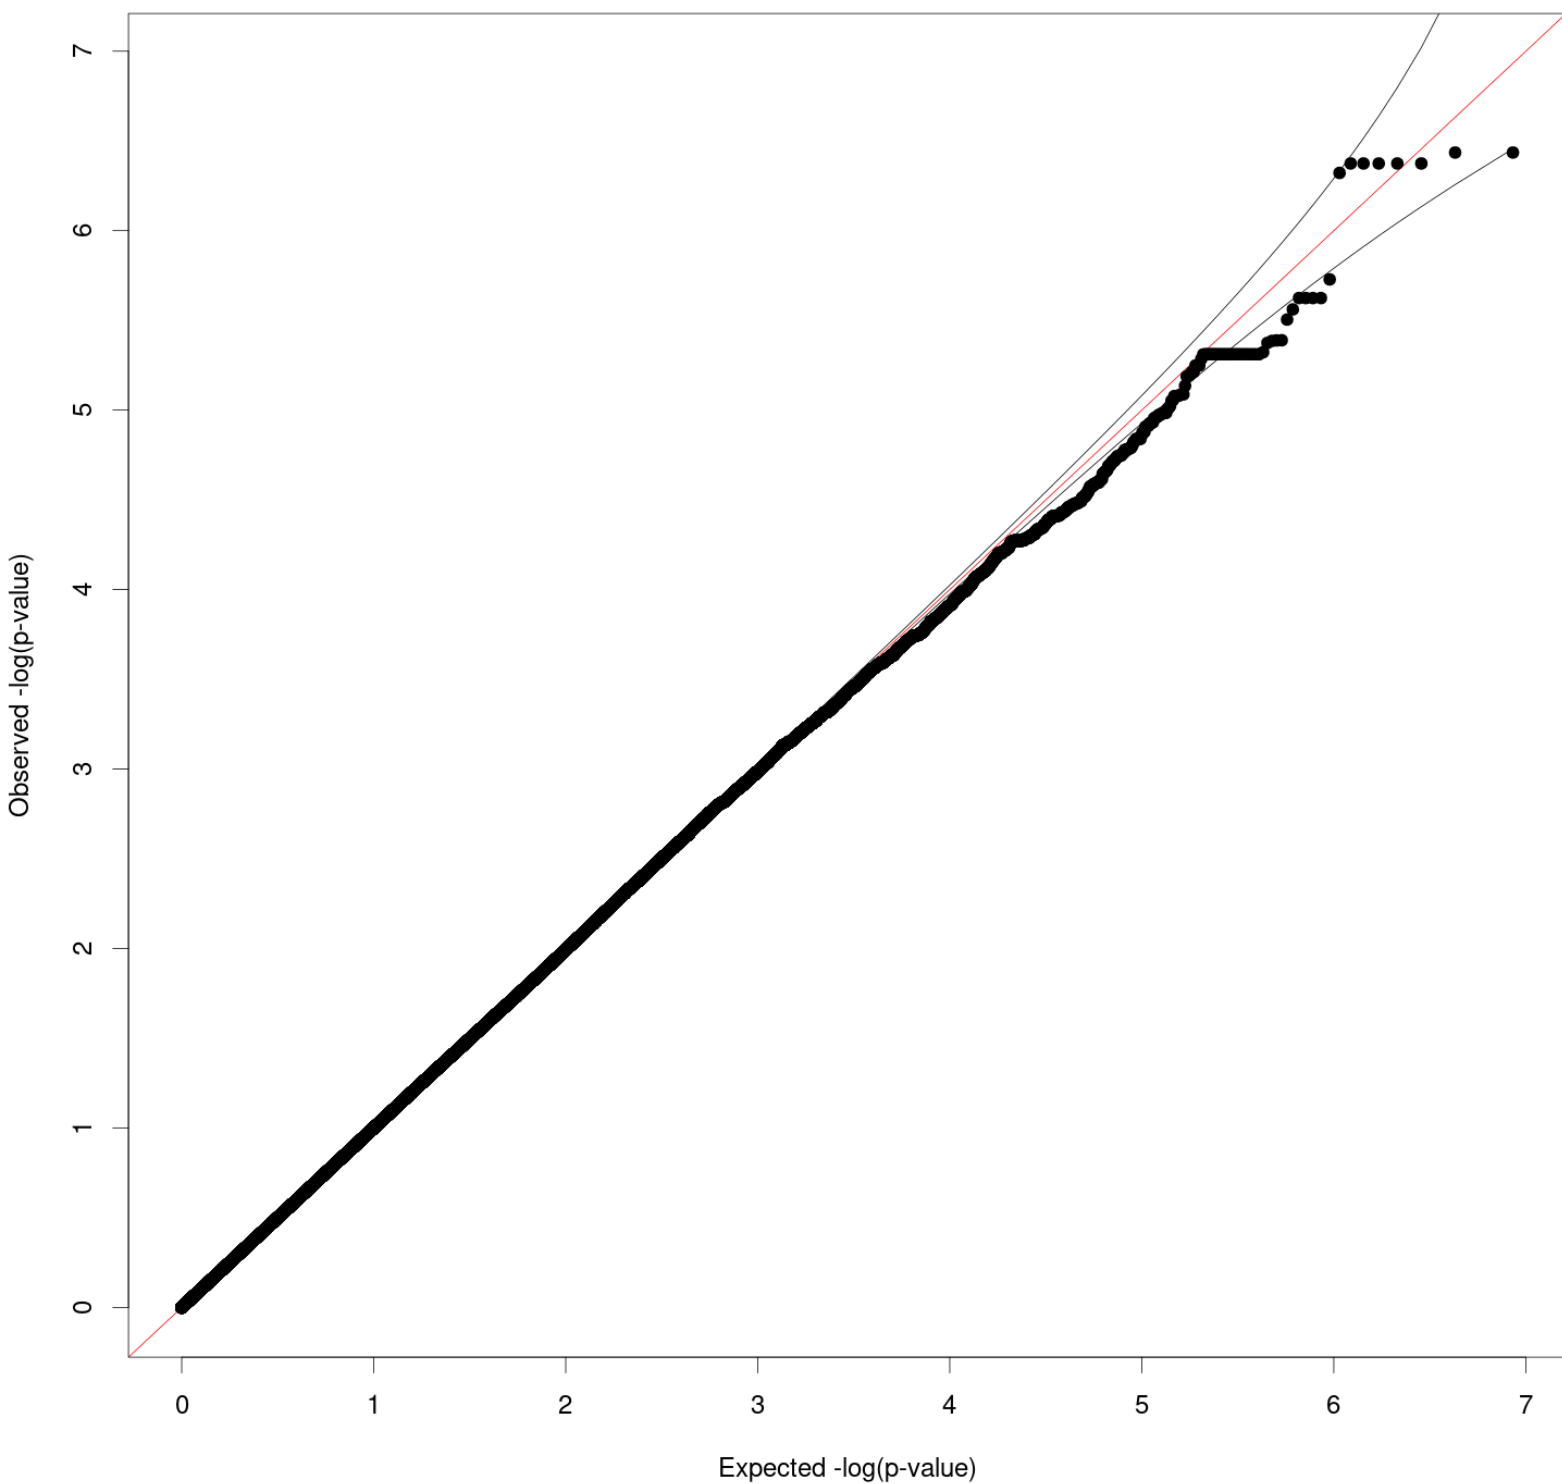



QQ plot for mz182.0811\_t55.8, tyrosine  
inflation factor = 0.9906

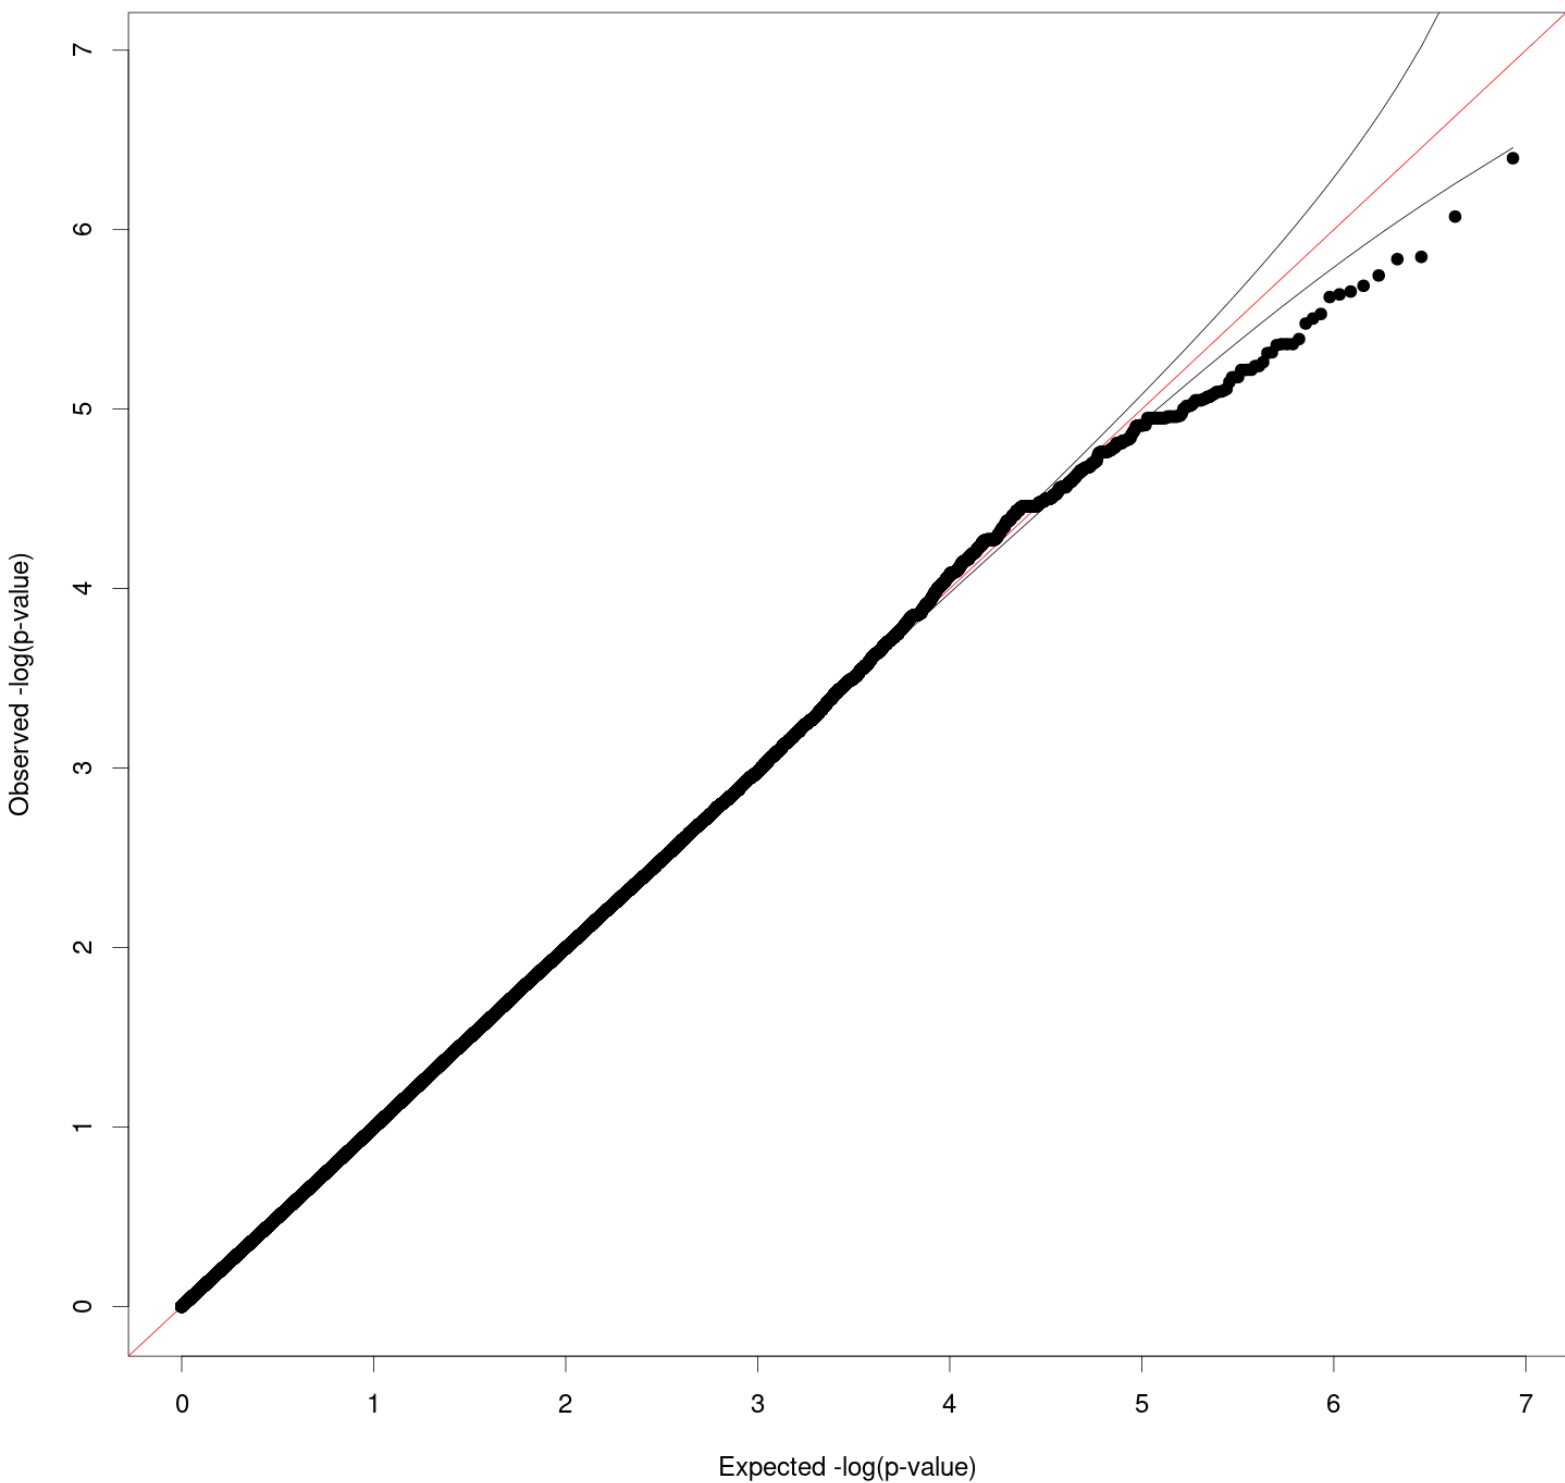

QQ plot for mz184.0603\_t21, 4-pyridoxate  
inflation factor = 0.9974

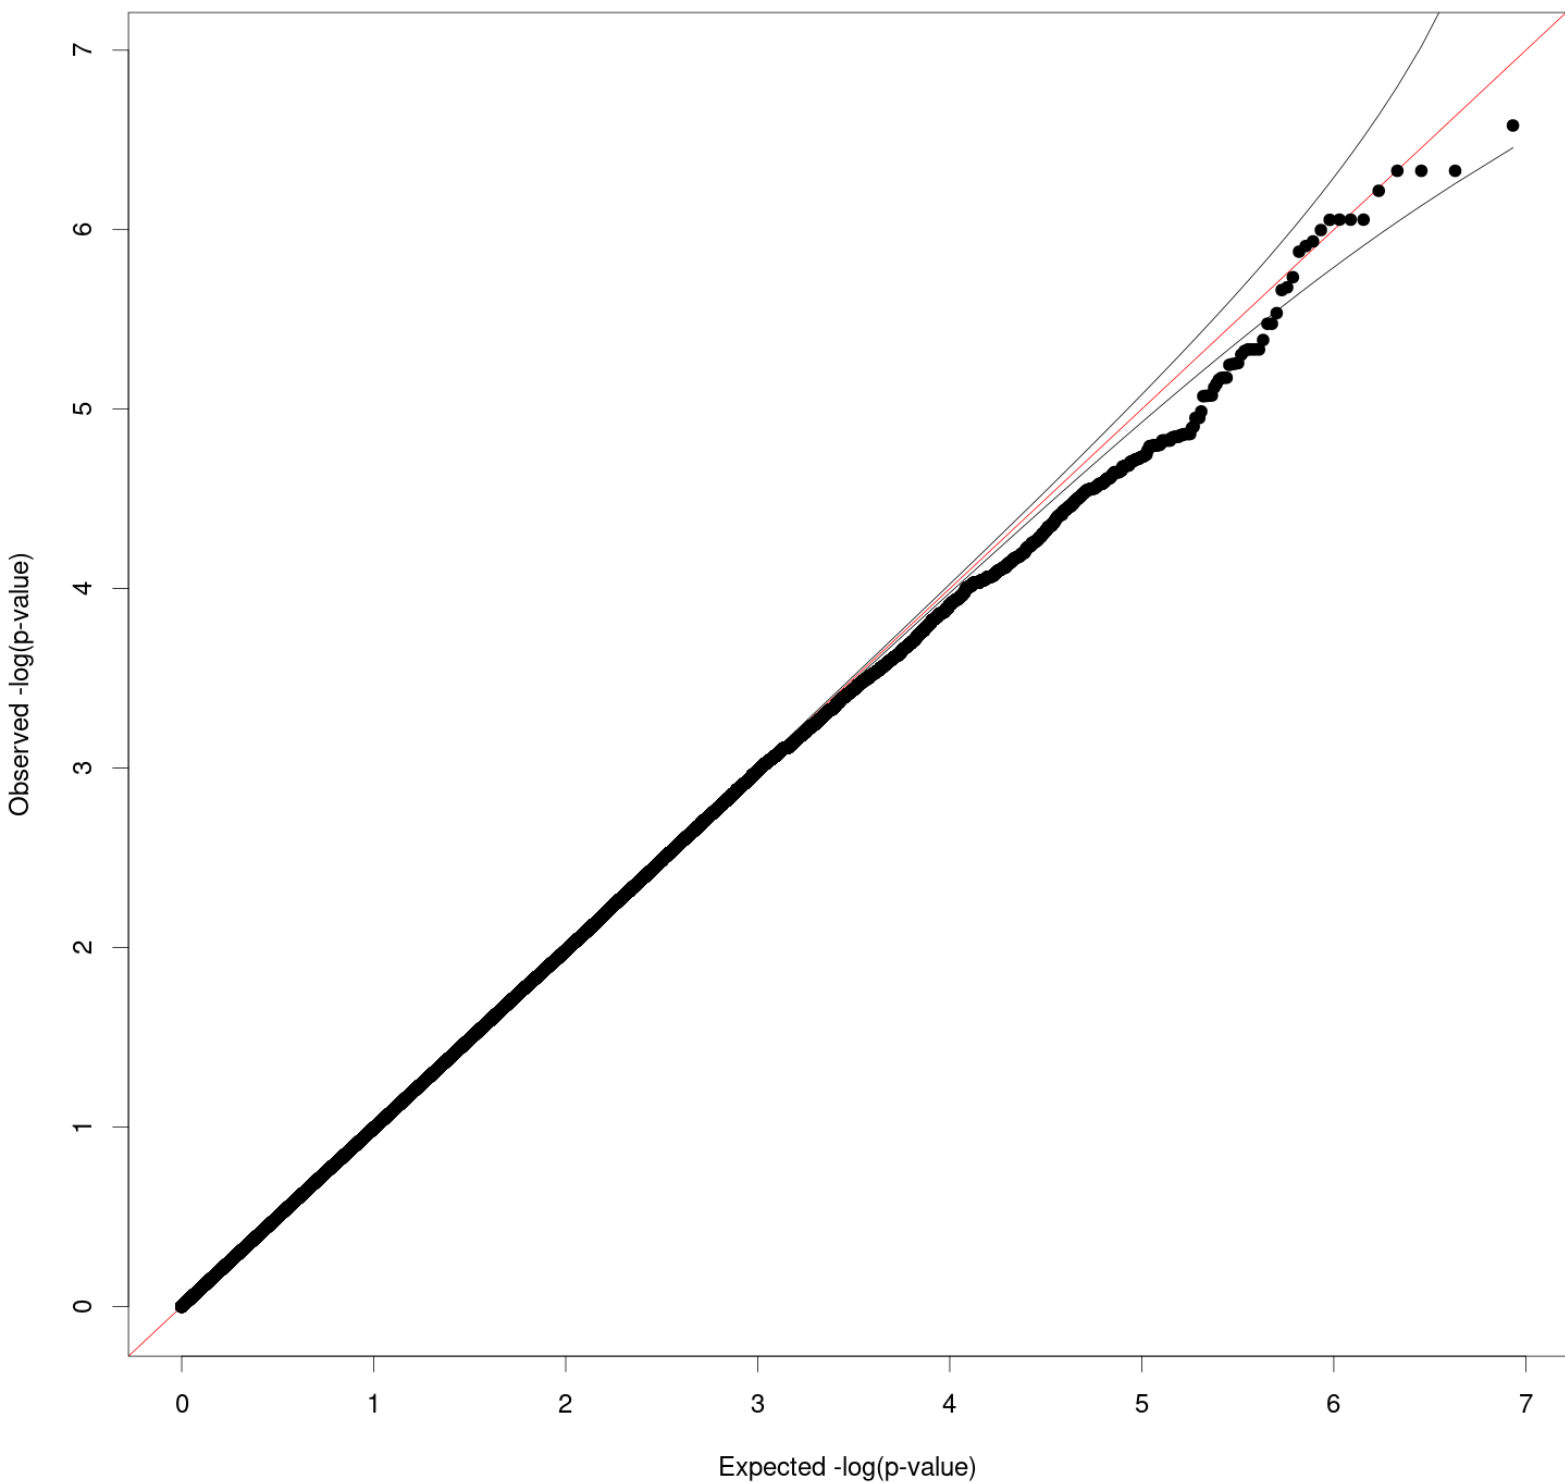

QQ plot for mz189.088\_t31.9, II-2,6-diaminoheptanedioate  
inflation factor = 0.9939

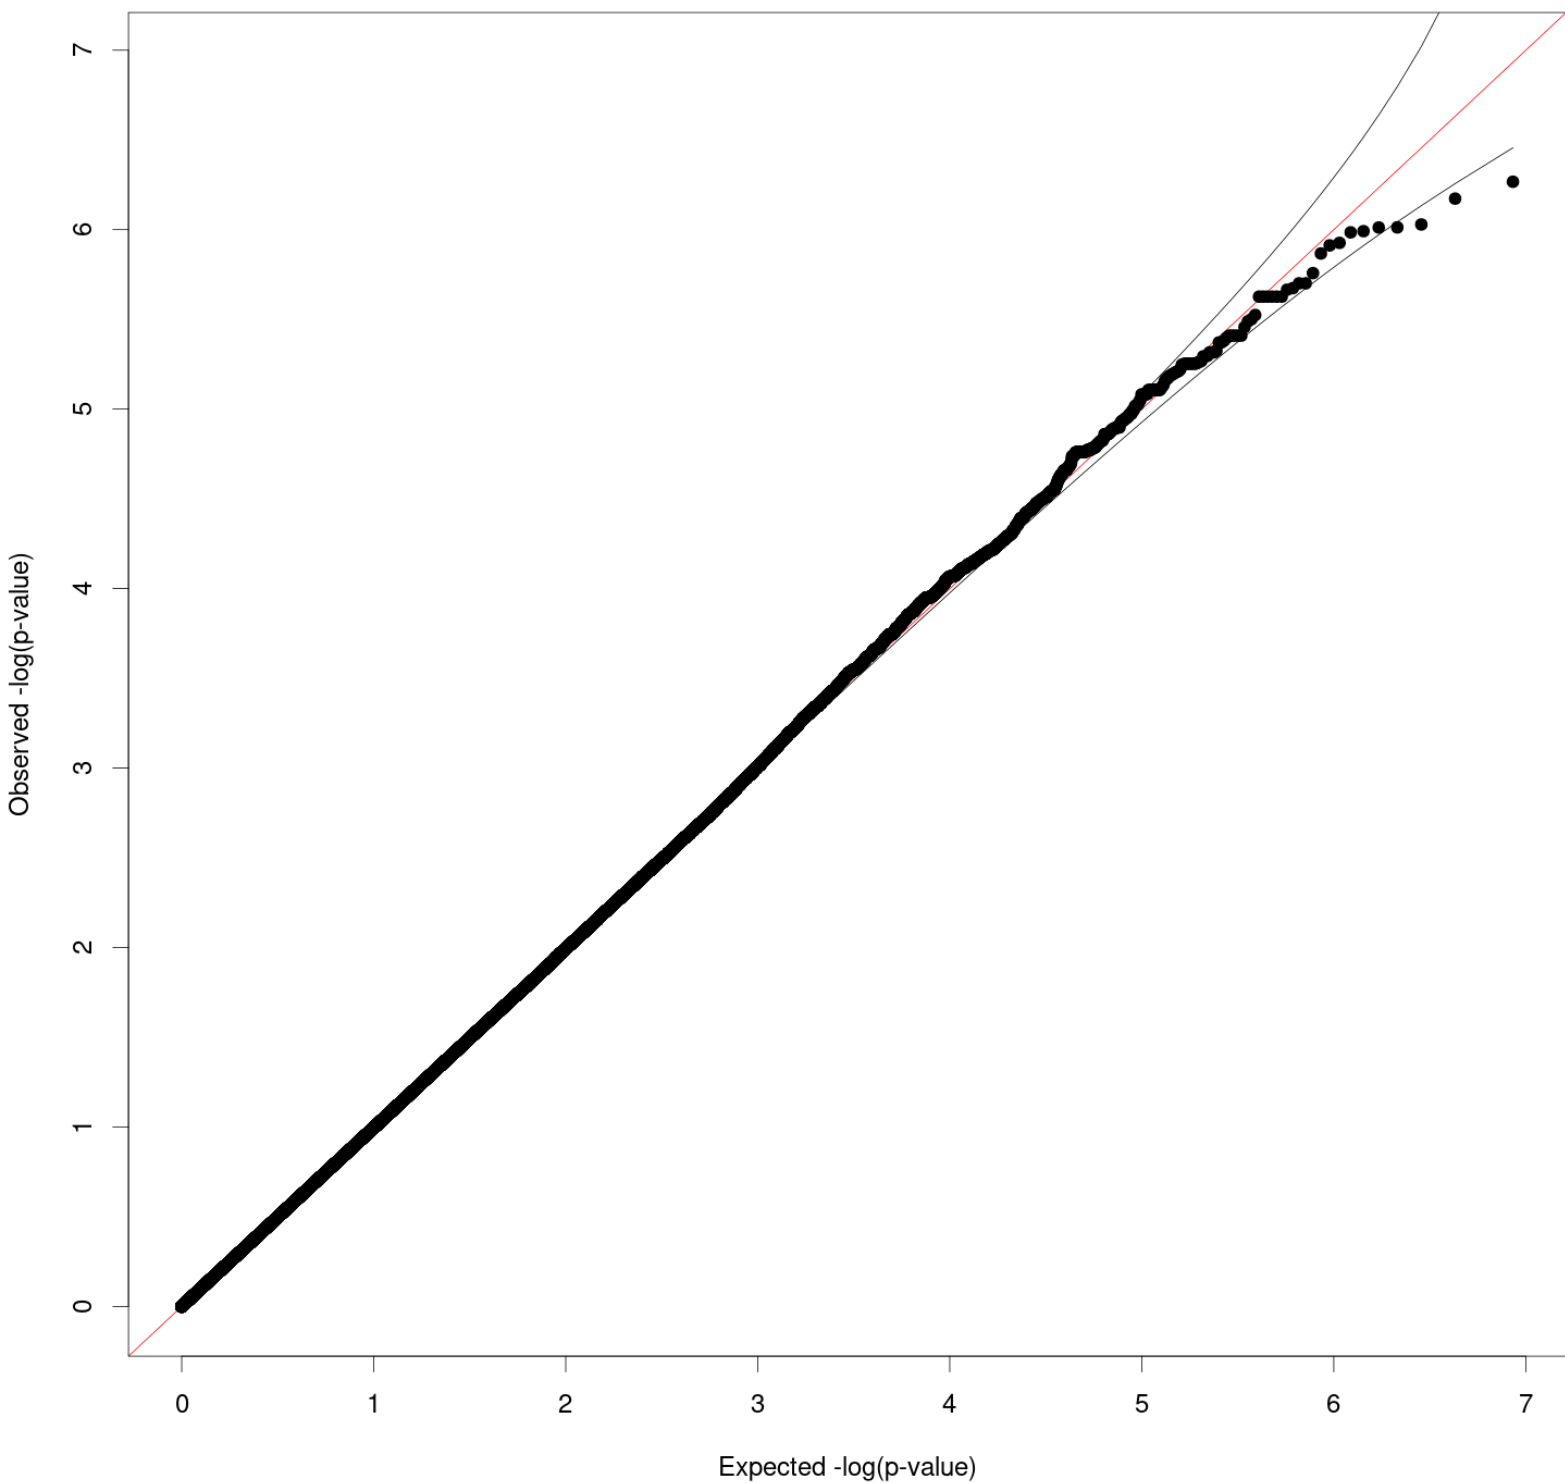

QQ plot for mz189.1233\_t69.3, nalpha-acetyl-l-lysine  
inflation factor = 0.9941

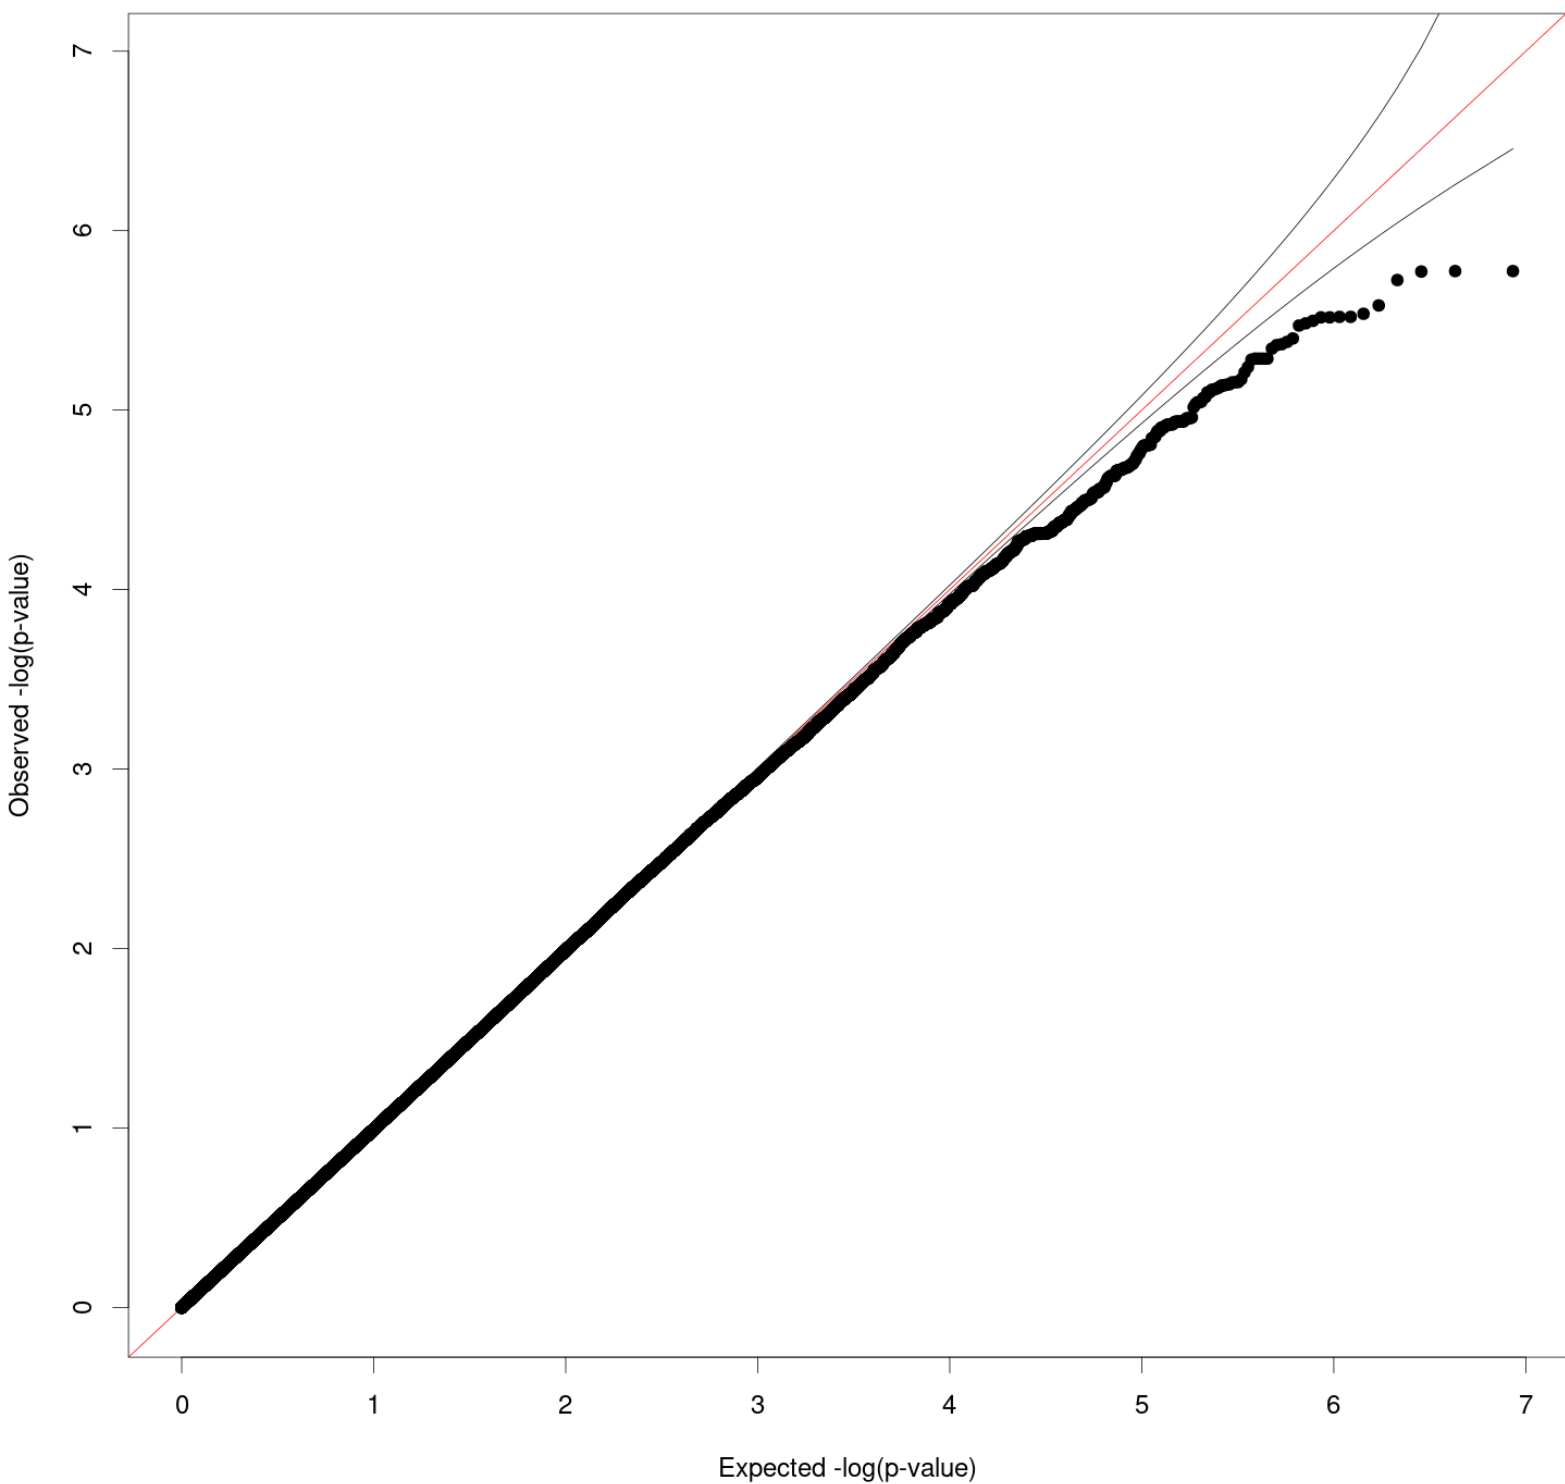

QQ plot for mz190.0496\_t20, 4-hydroxy-2-quinolinecarboxylic acid  
inflation factor = 1.005

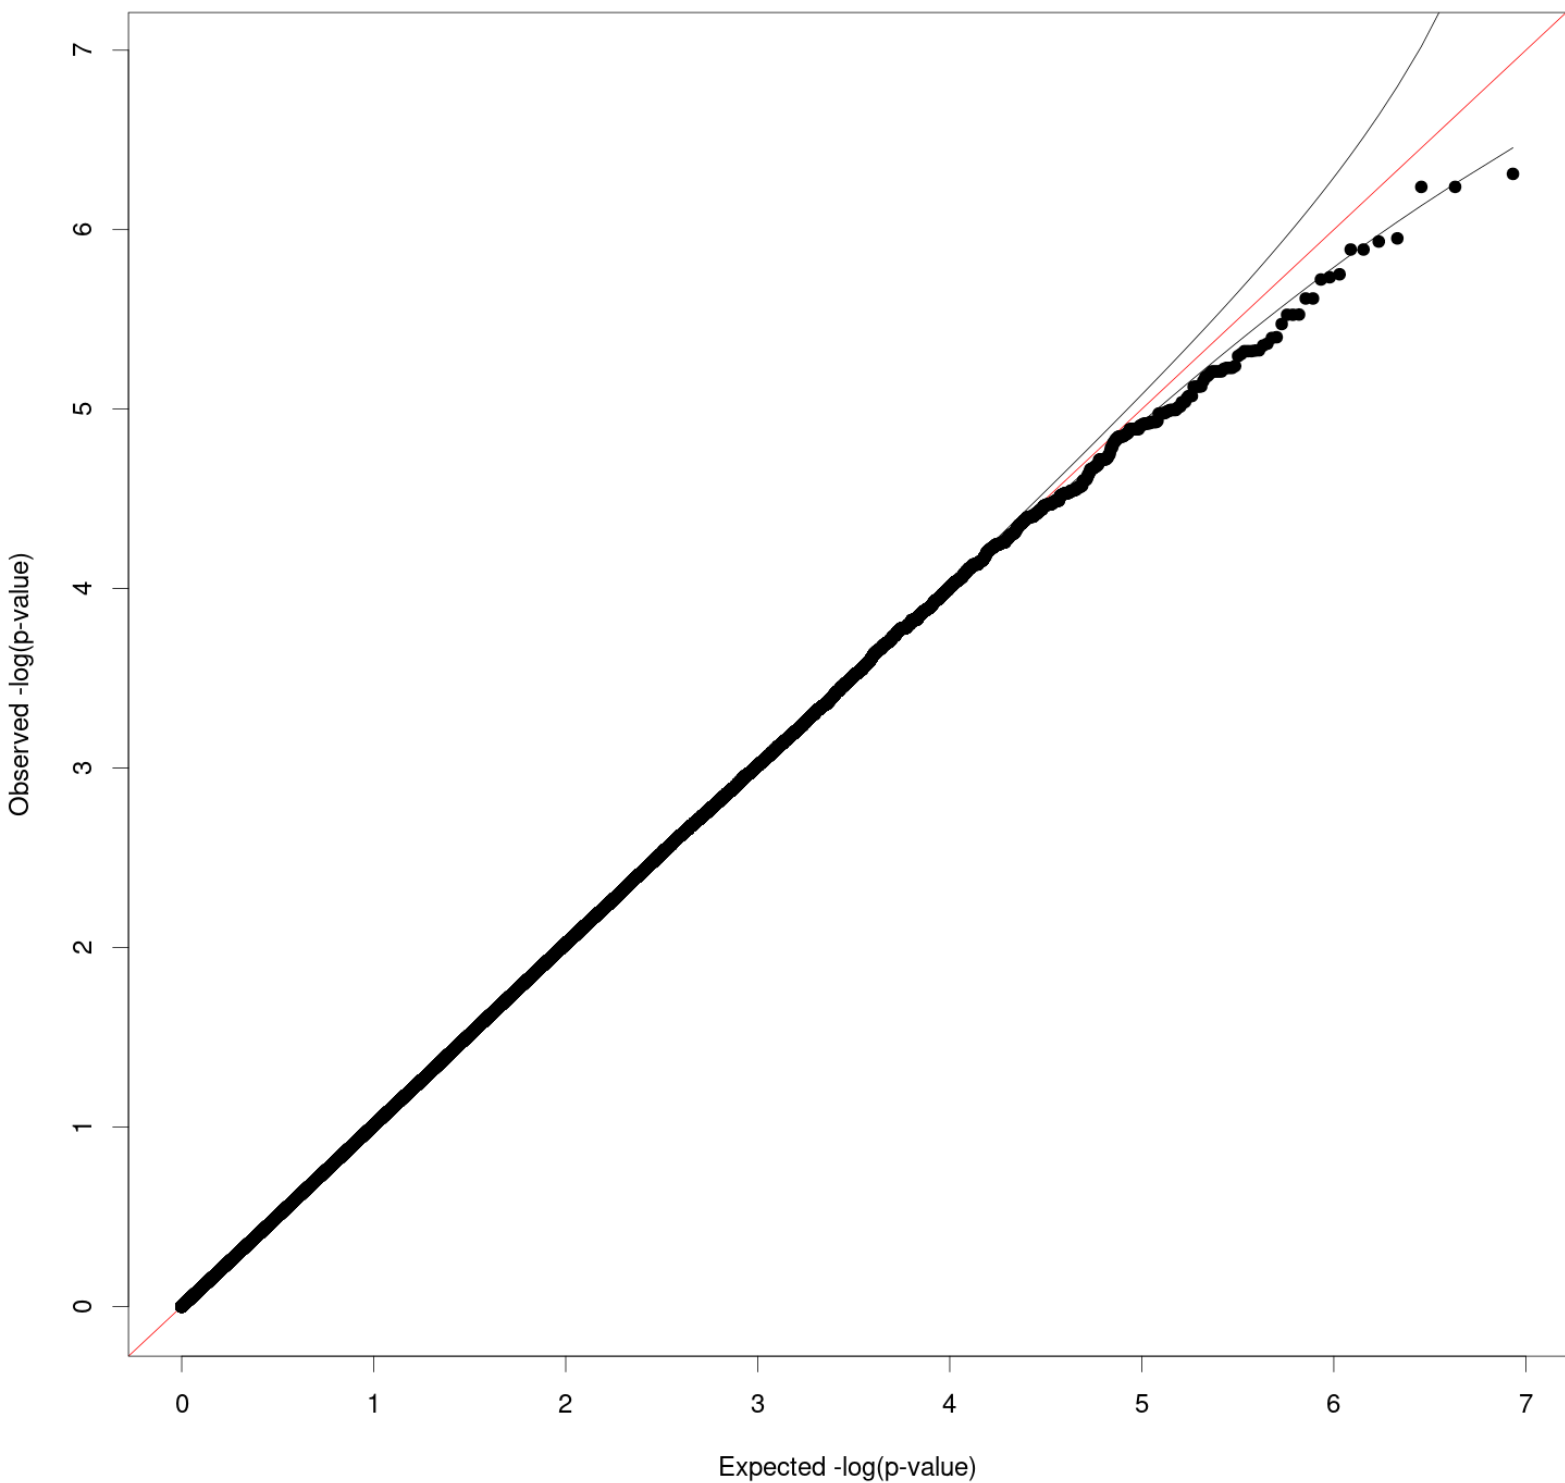

QQ plot for mz190.0544\_t27.4, n-acetyl-dl-methionine  
inflation factor = 0.9999

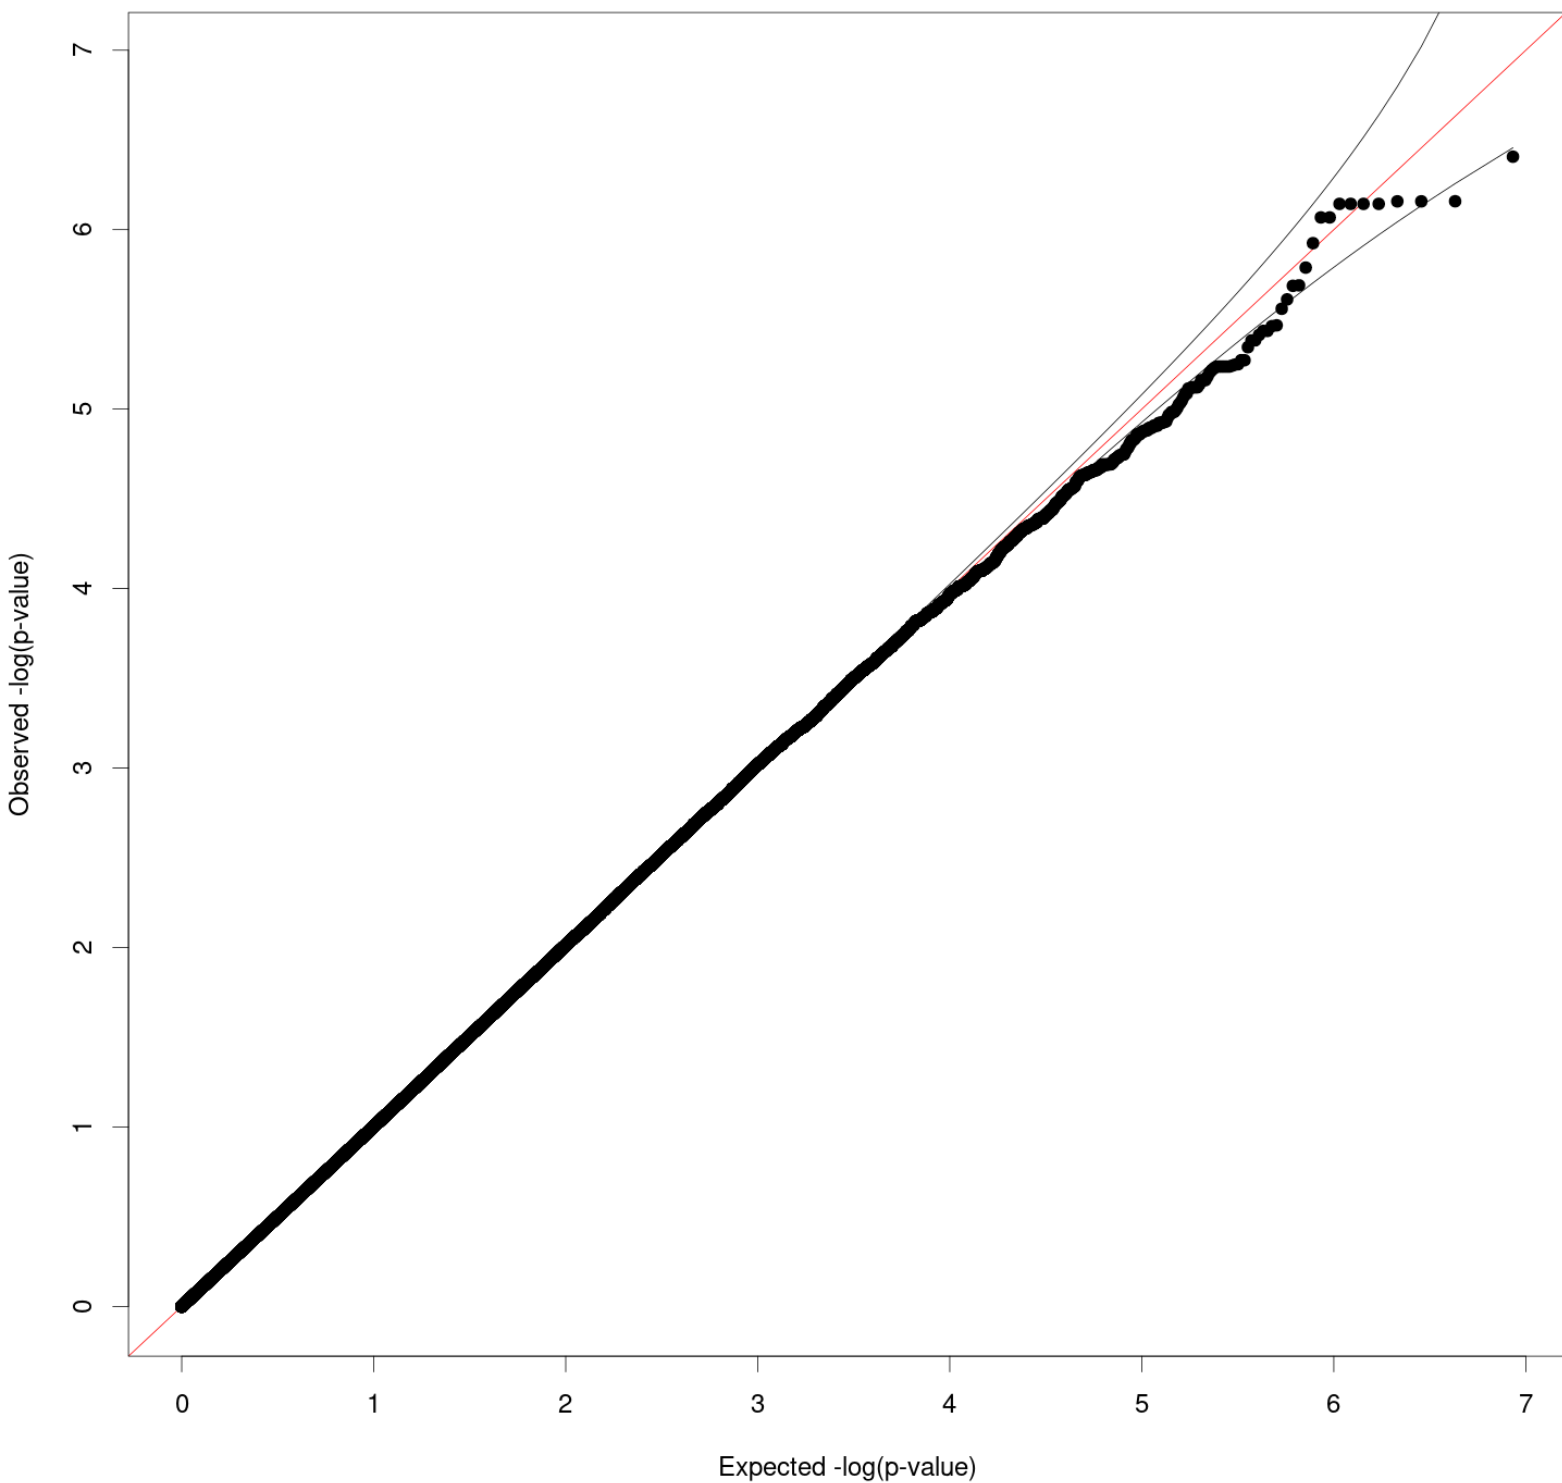

QQ plot for mz192.0655\_t46.6, 5-hydroxyindoleacetate  
inflation factor = 0.9961

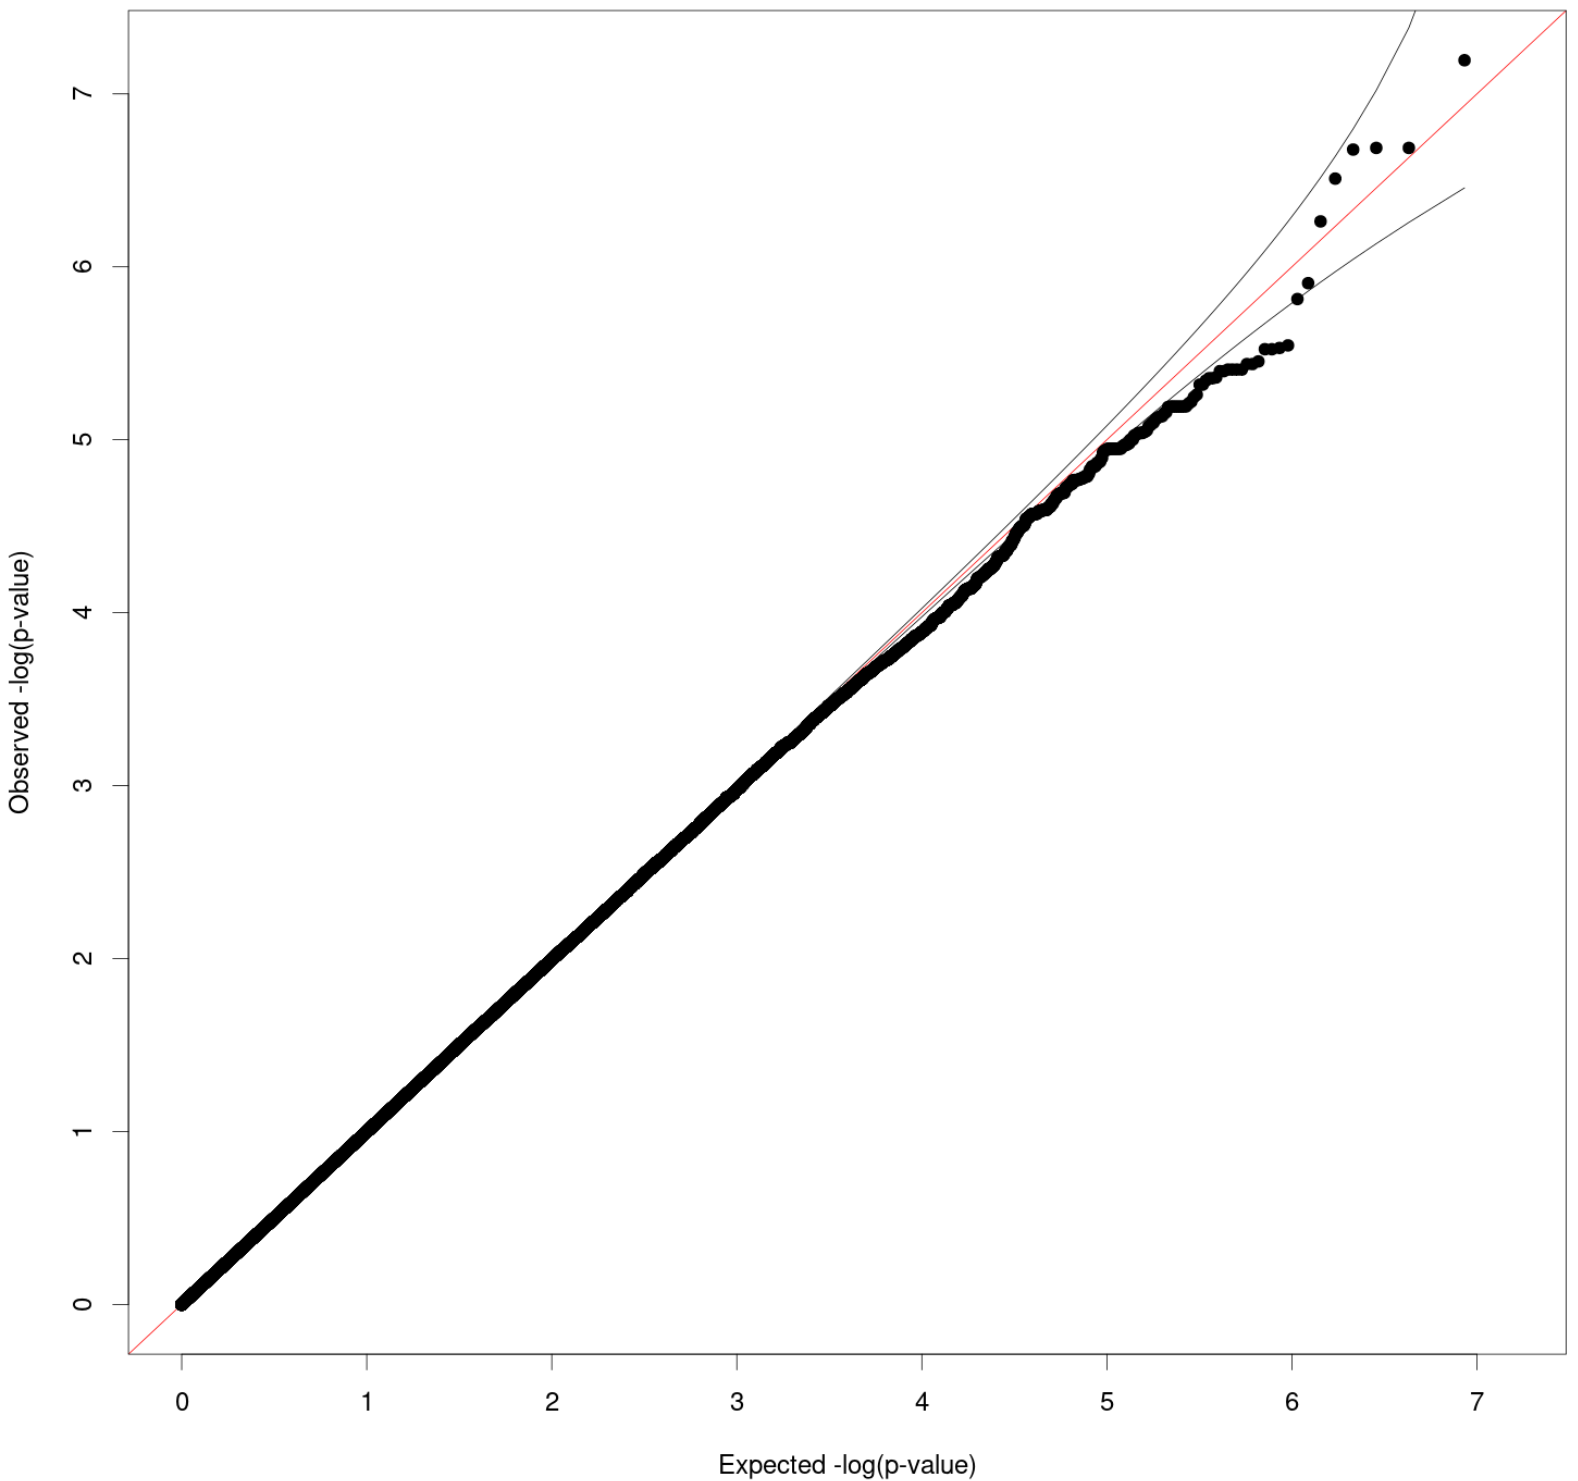

QQ plot for mz195.0505\_t48.3, d-glucuronic acid  
inflation factor = 1.006

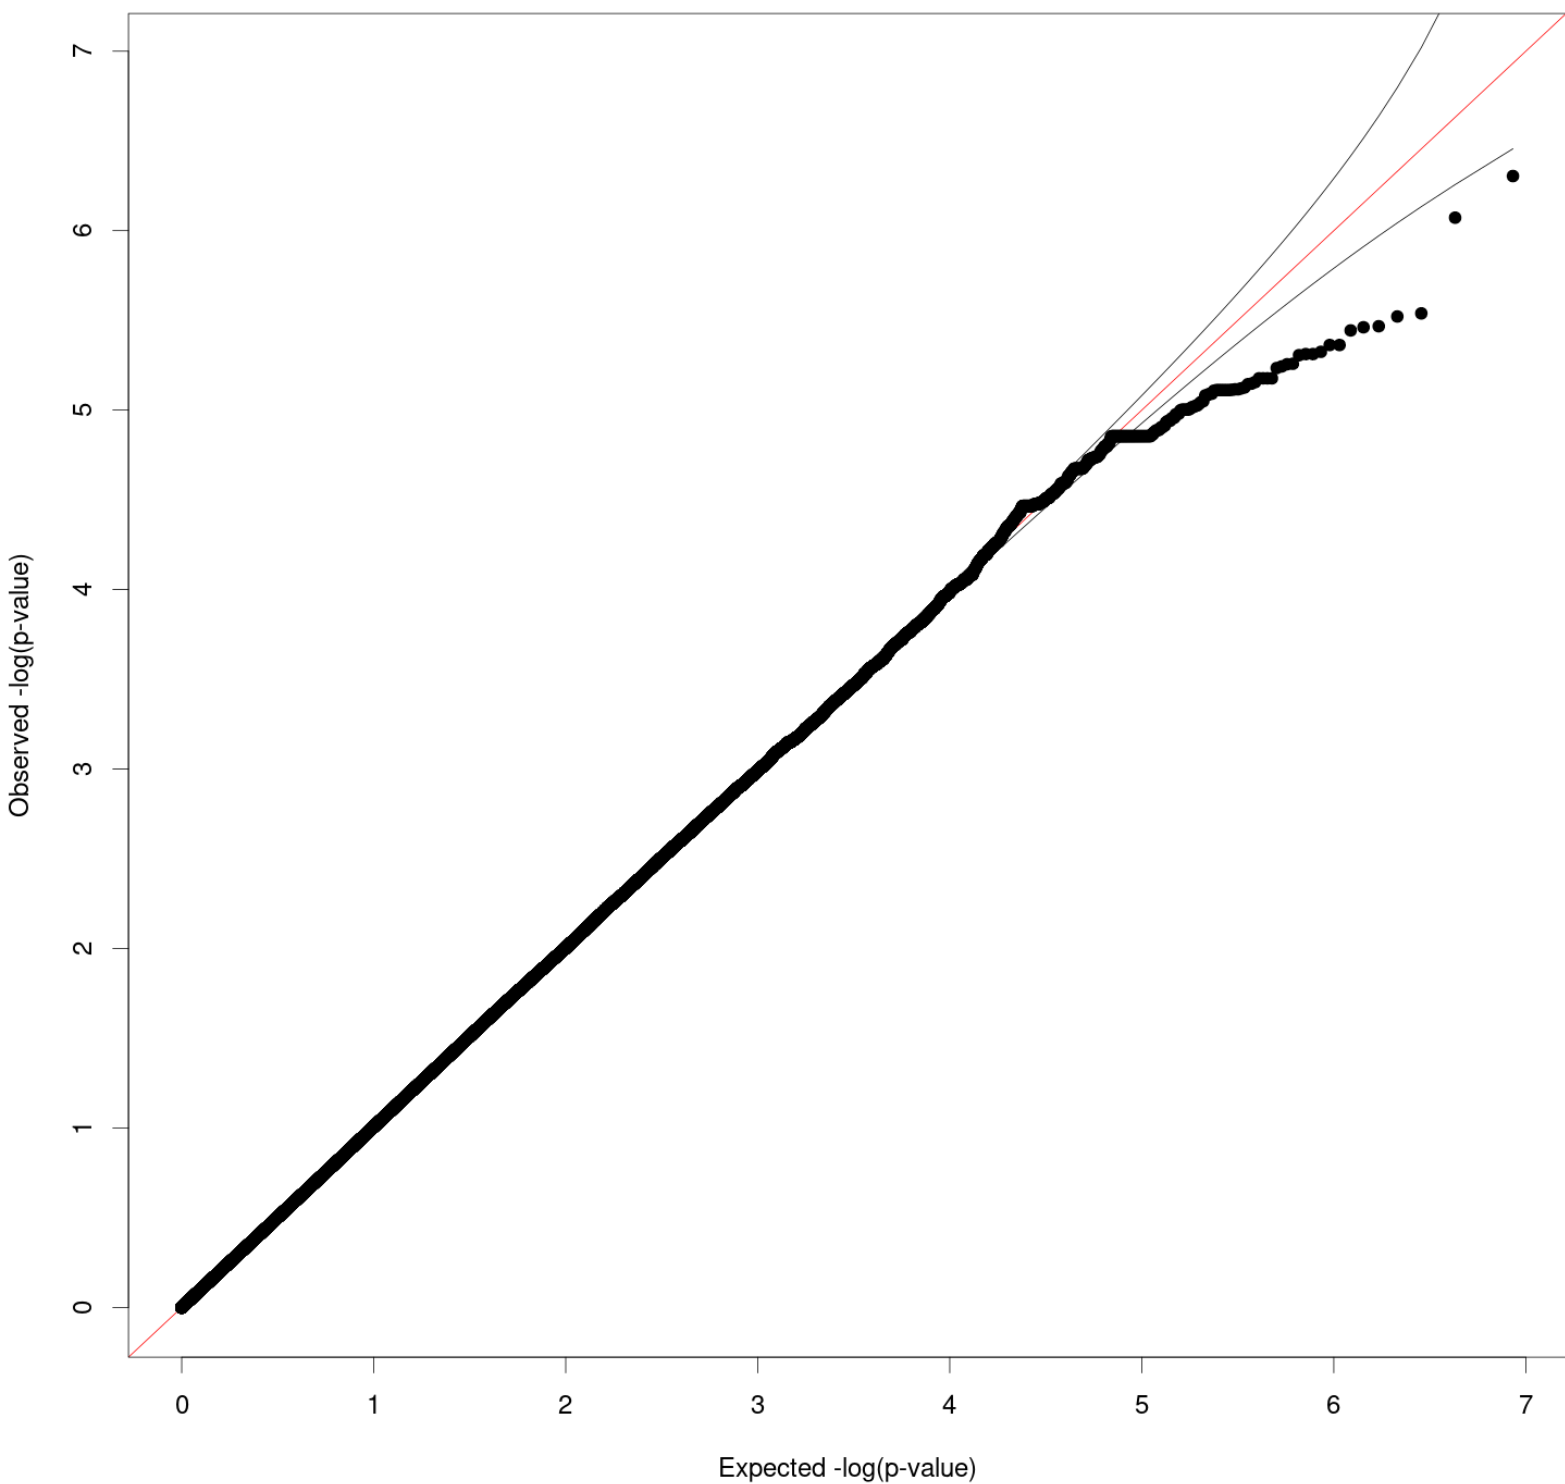



QQ plot for mz195.0511\_t23.4, gluconic acid  
inflation factor = 0.9992

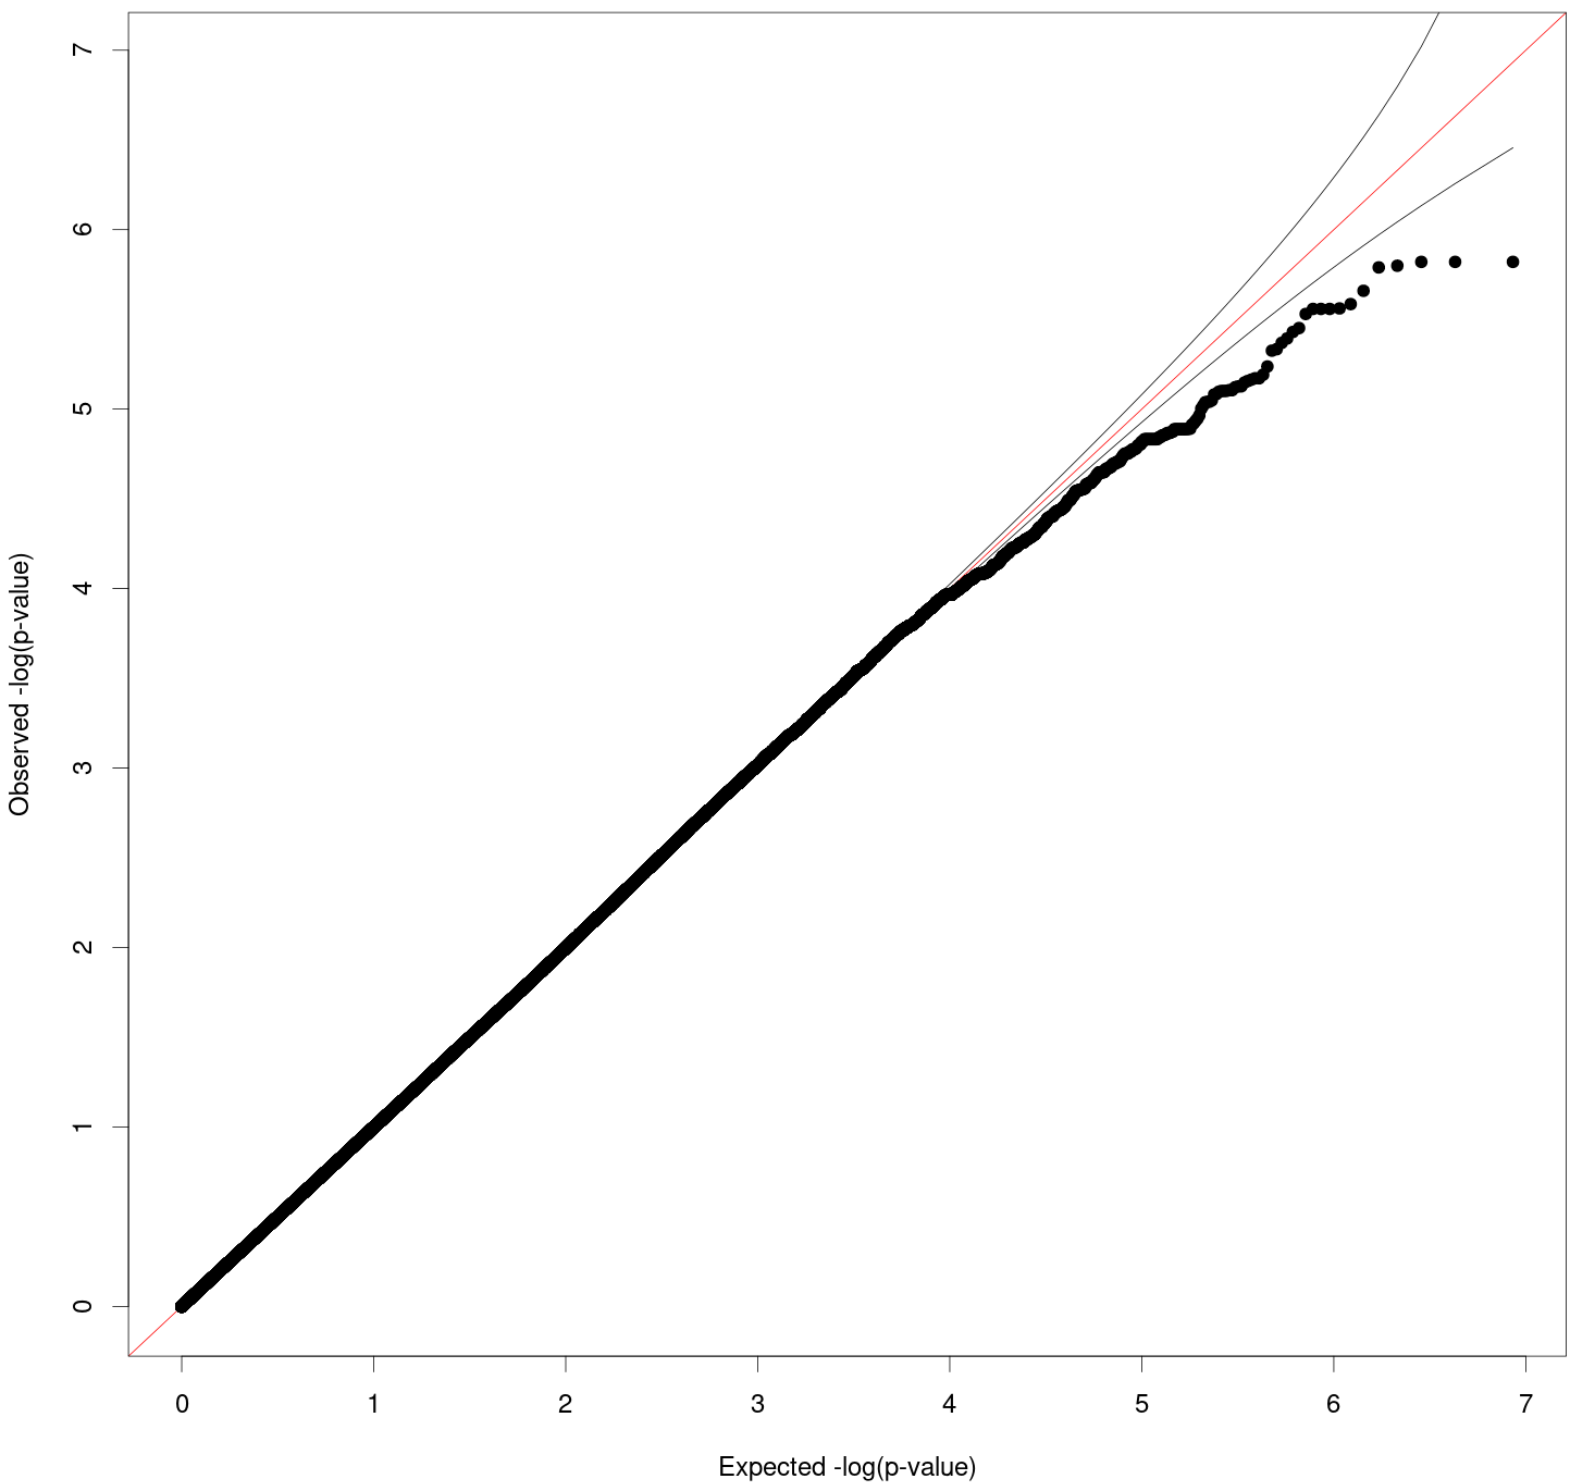

QQ plot for mz195.0651\_t53.4, ferulate  
inflation factor = 0.996

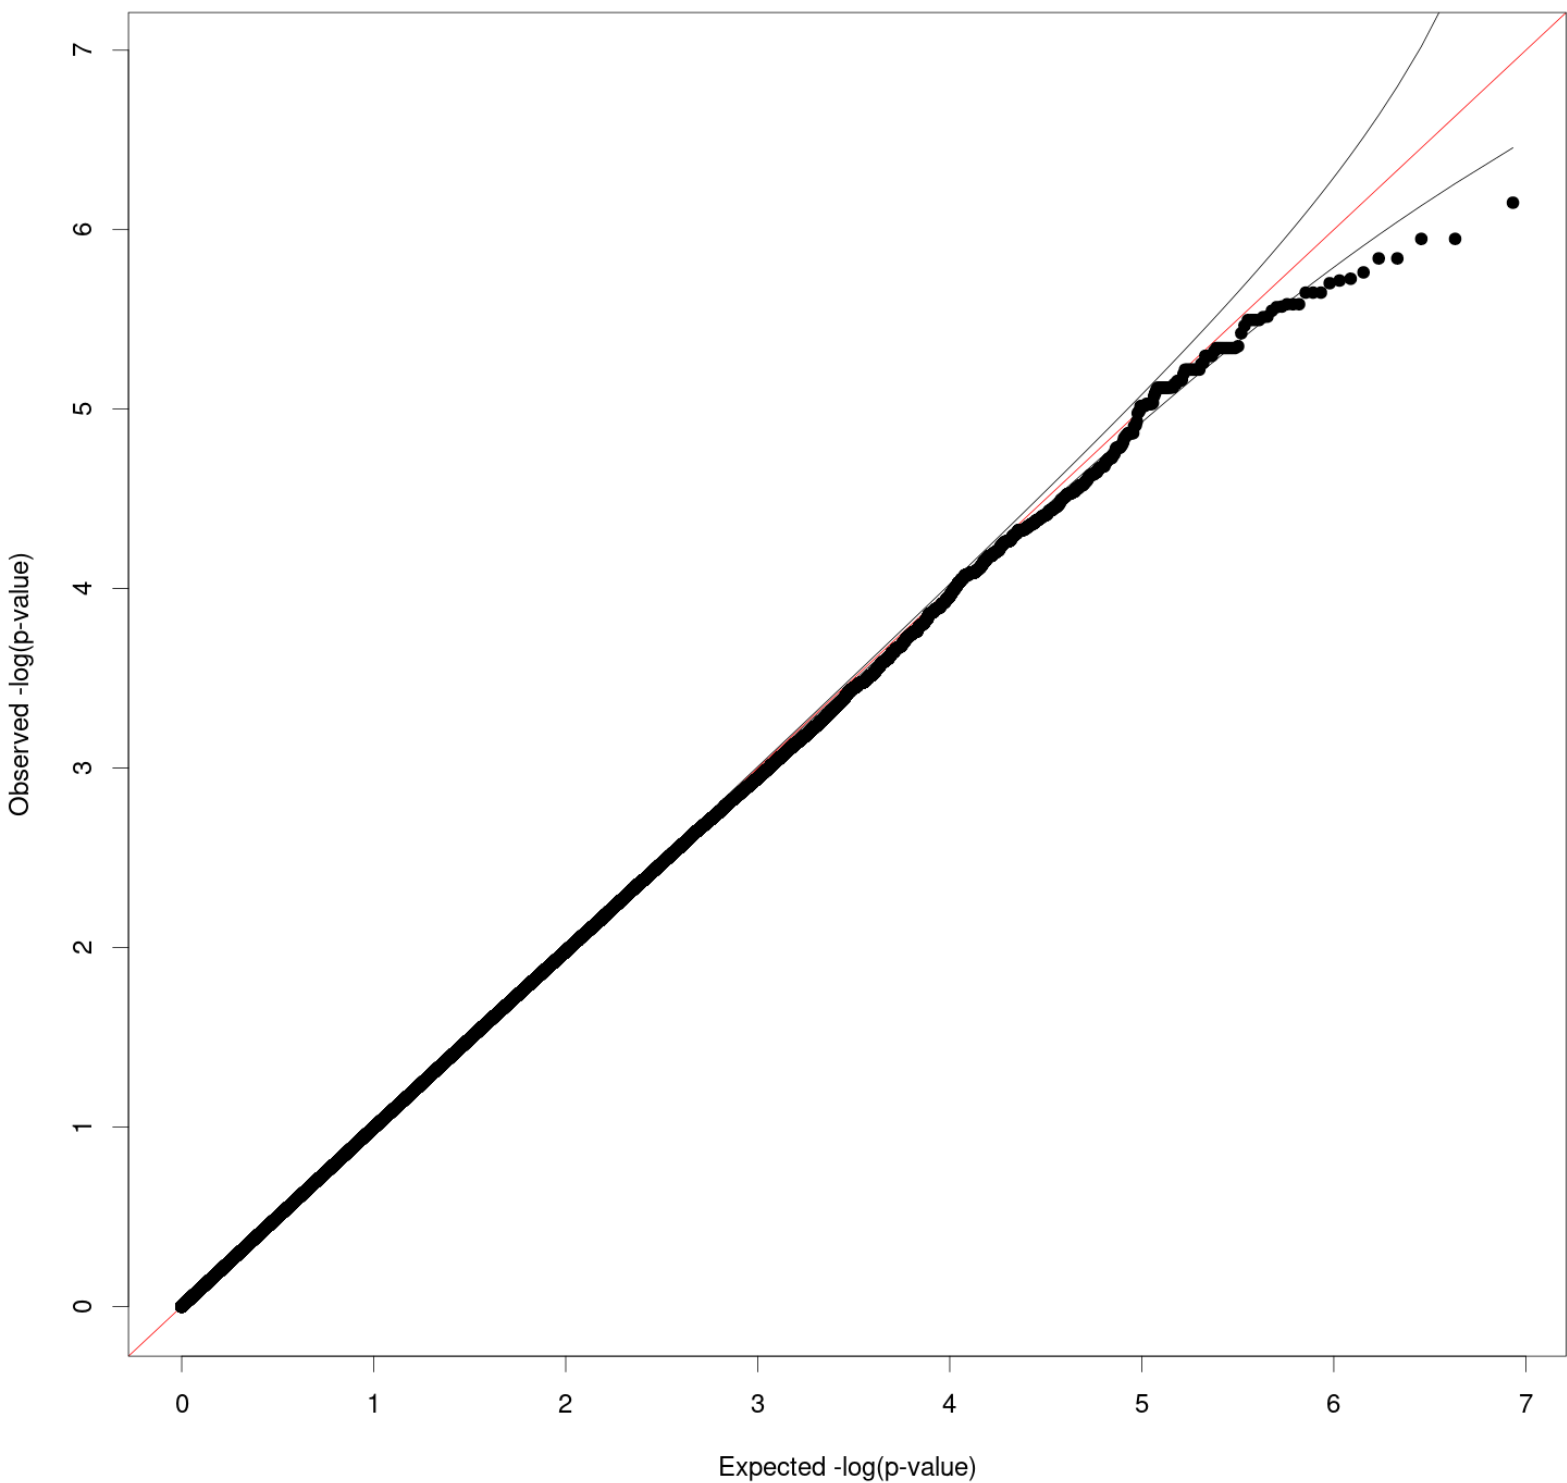

QQ plot for mz197.0433\_t40.7, 3-methoxy-4-hydroxymandelate  
inflation factor = 0.9964

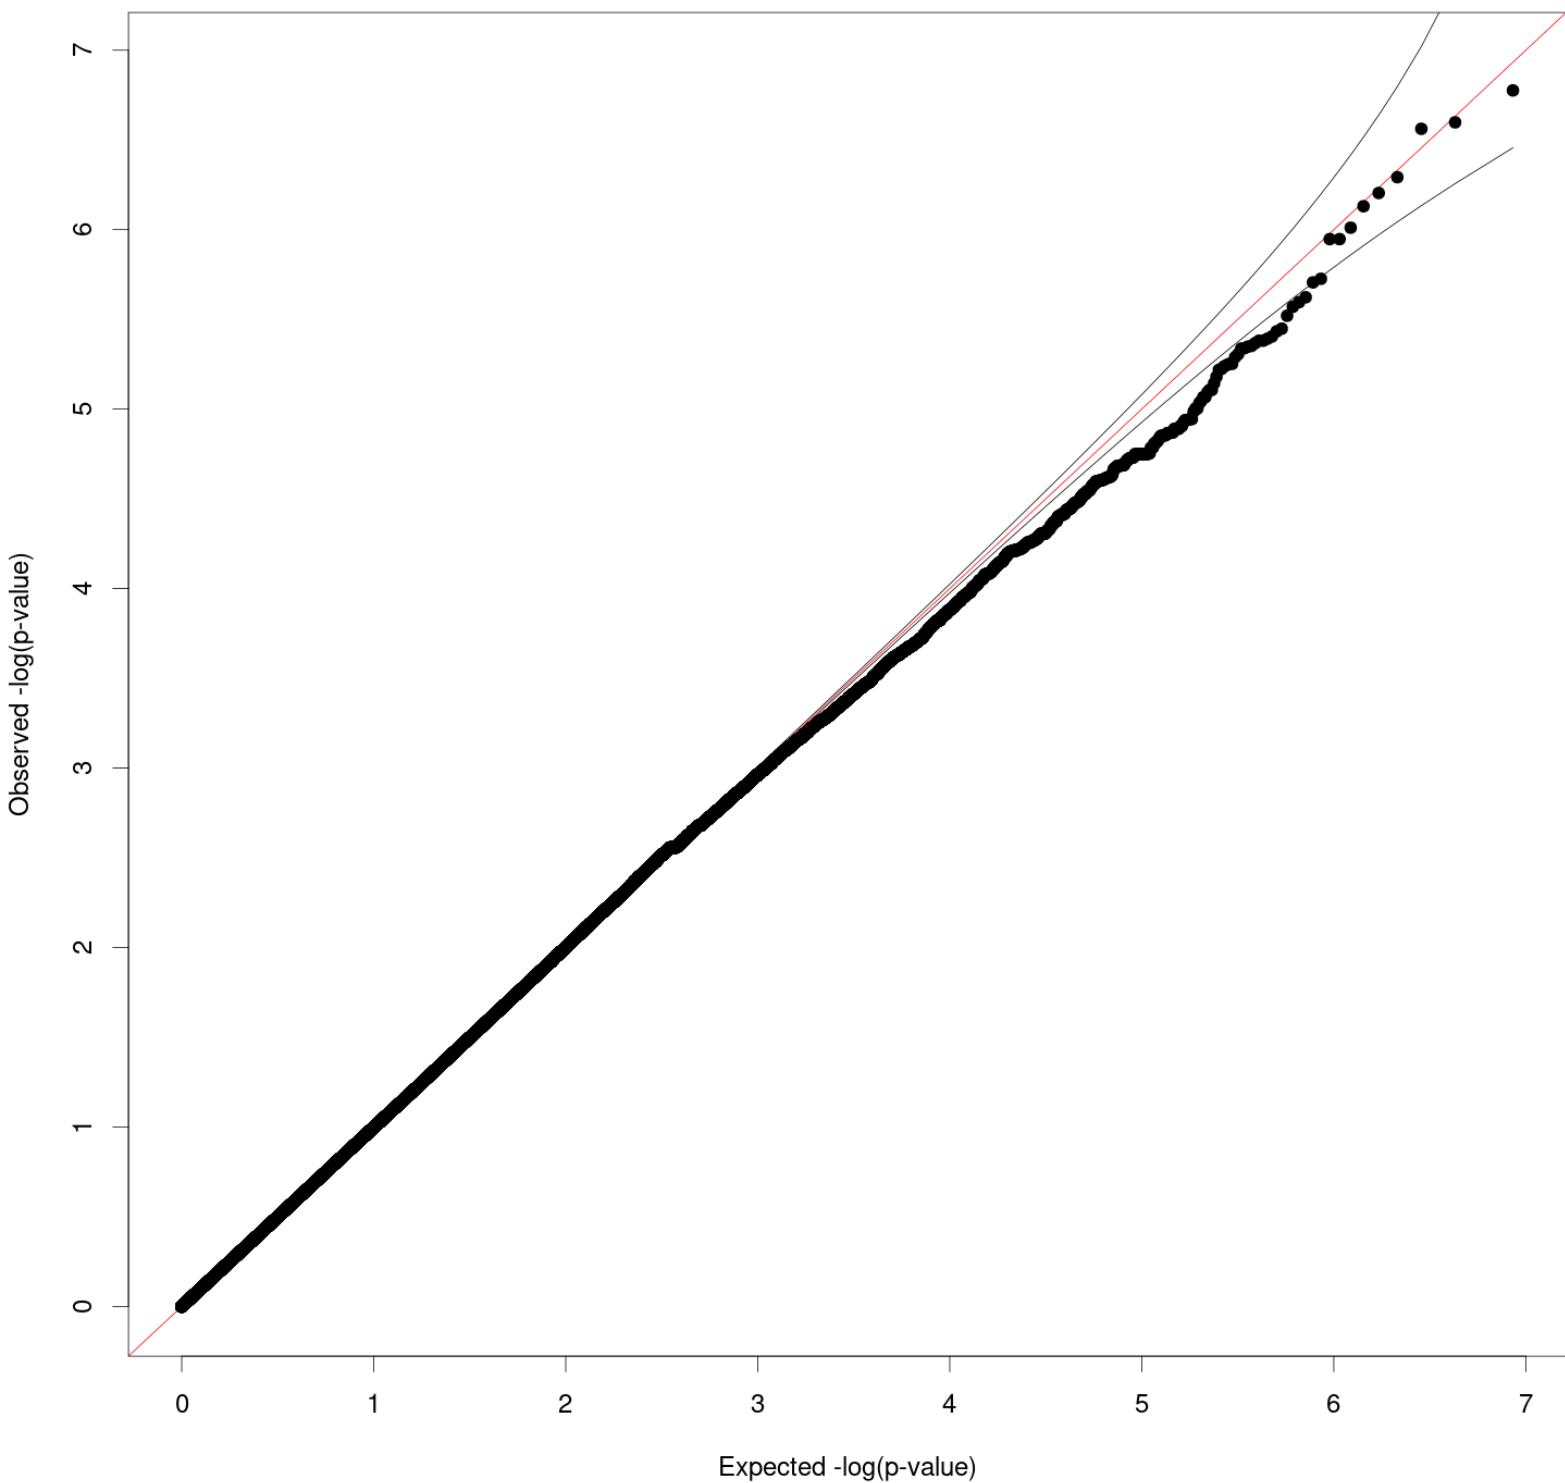

QQ plot for mz198.076\_t50.3, 3,4-dihydroxy-l-phenylalanine (l-dopa)  
inflation factor = 0.9933

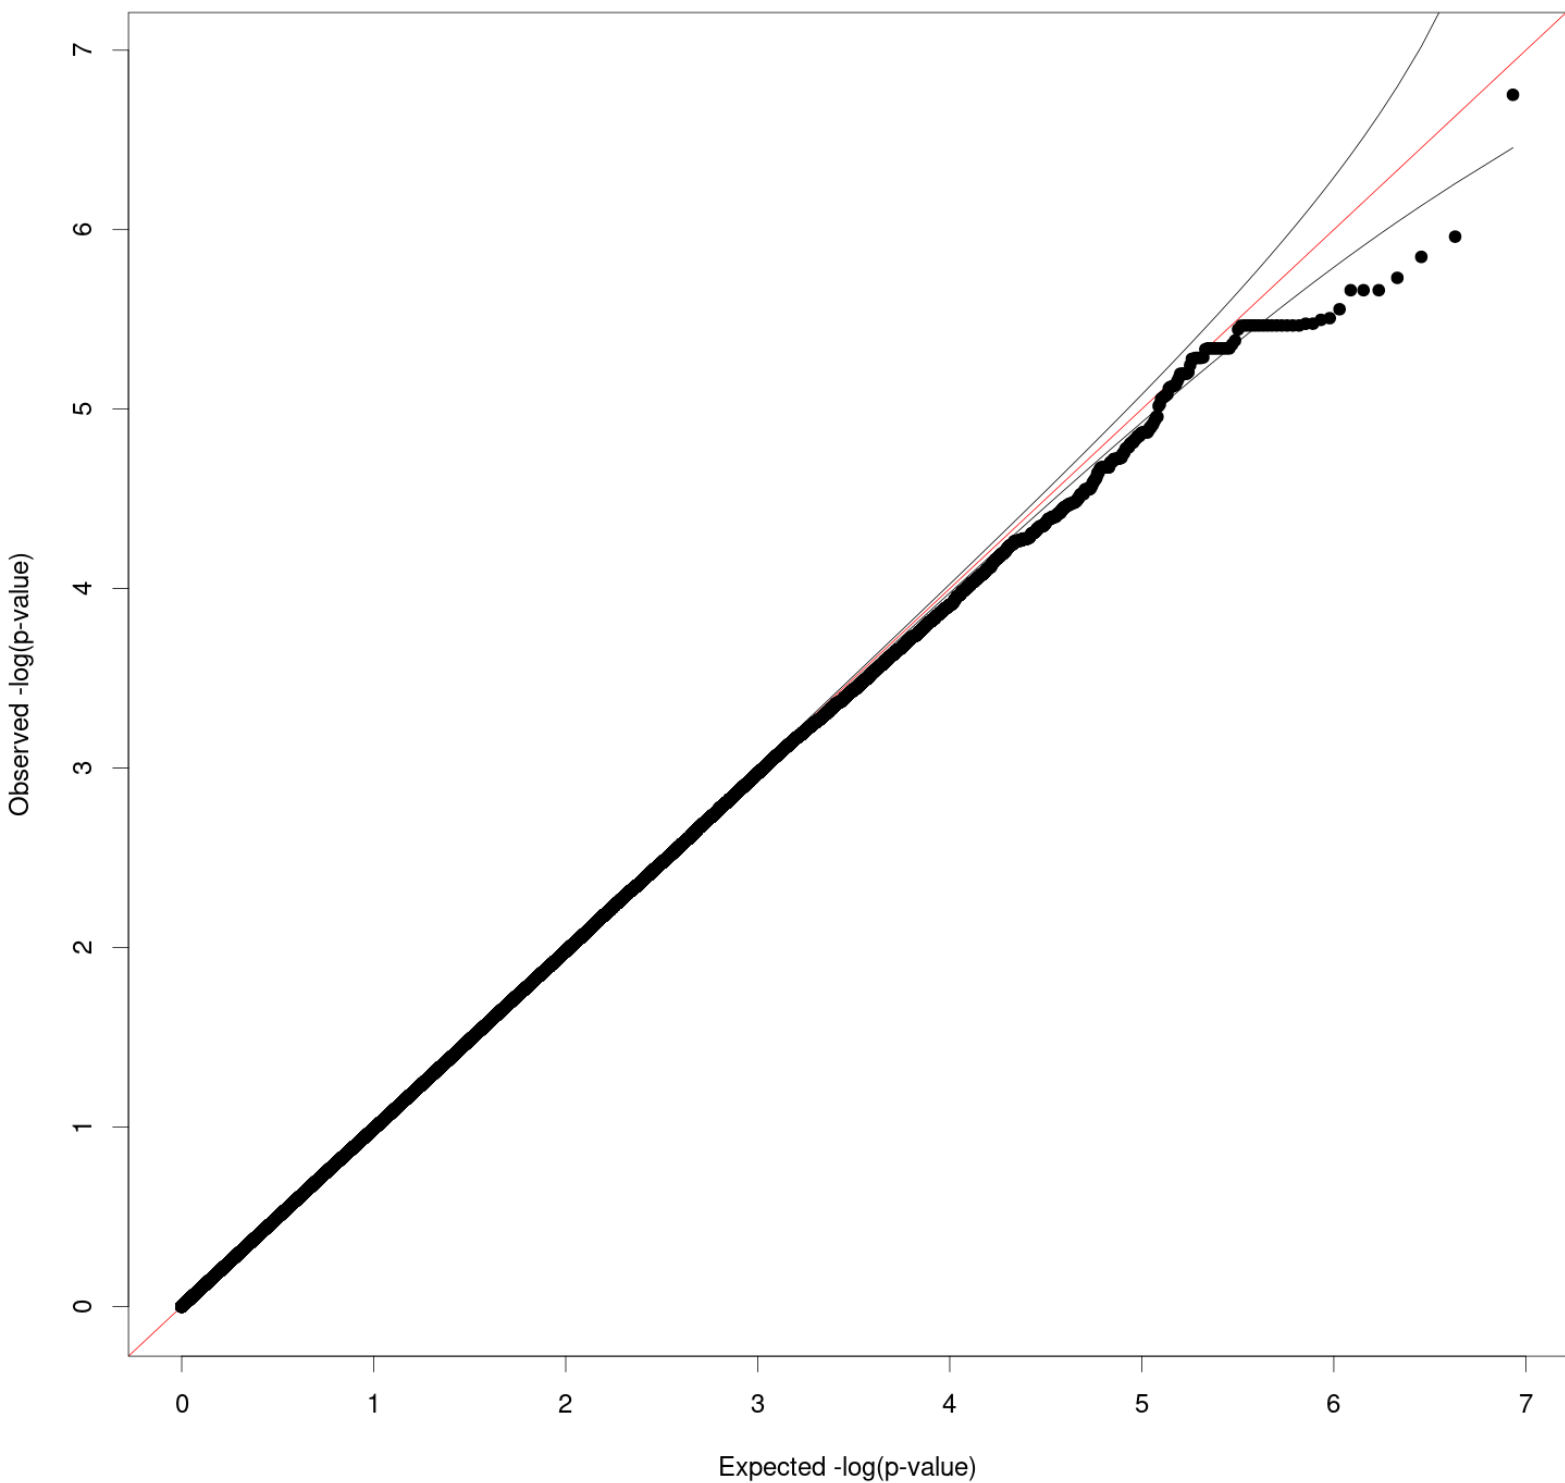

QQ plot for mz199.1704\_t152.3, lauric acid  
inflation factor = 1

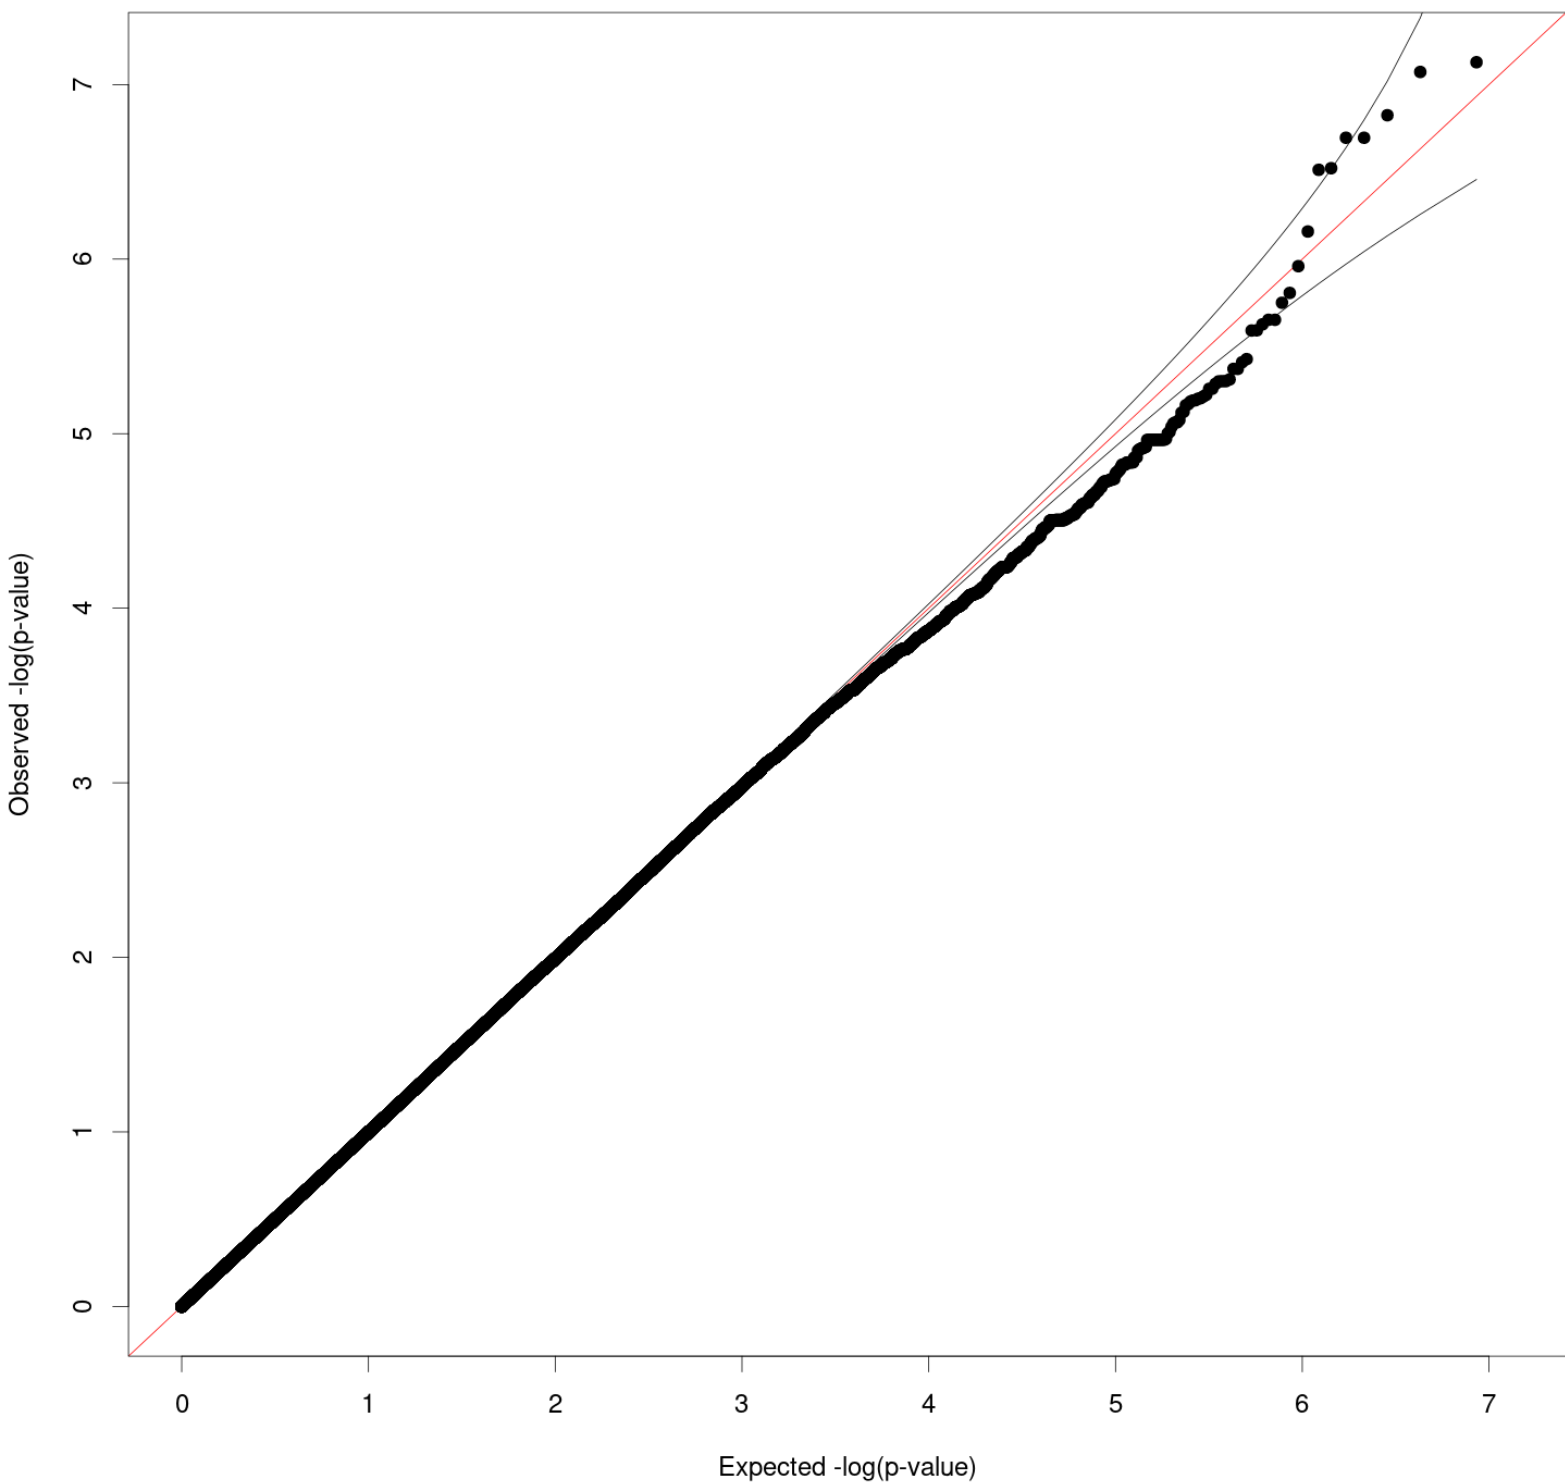

QQ plot for mz202.1087\_t40.9, n6-(delta2-isopentenyl)-adenine  
inflation factor = 1.003

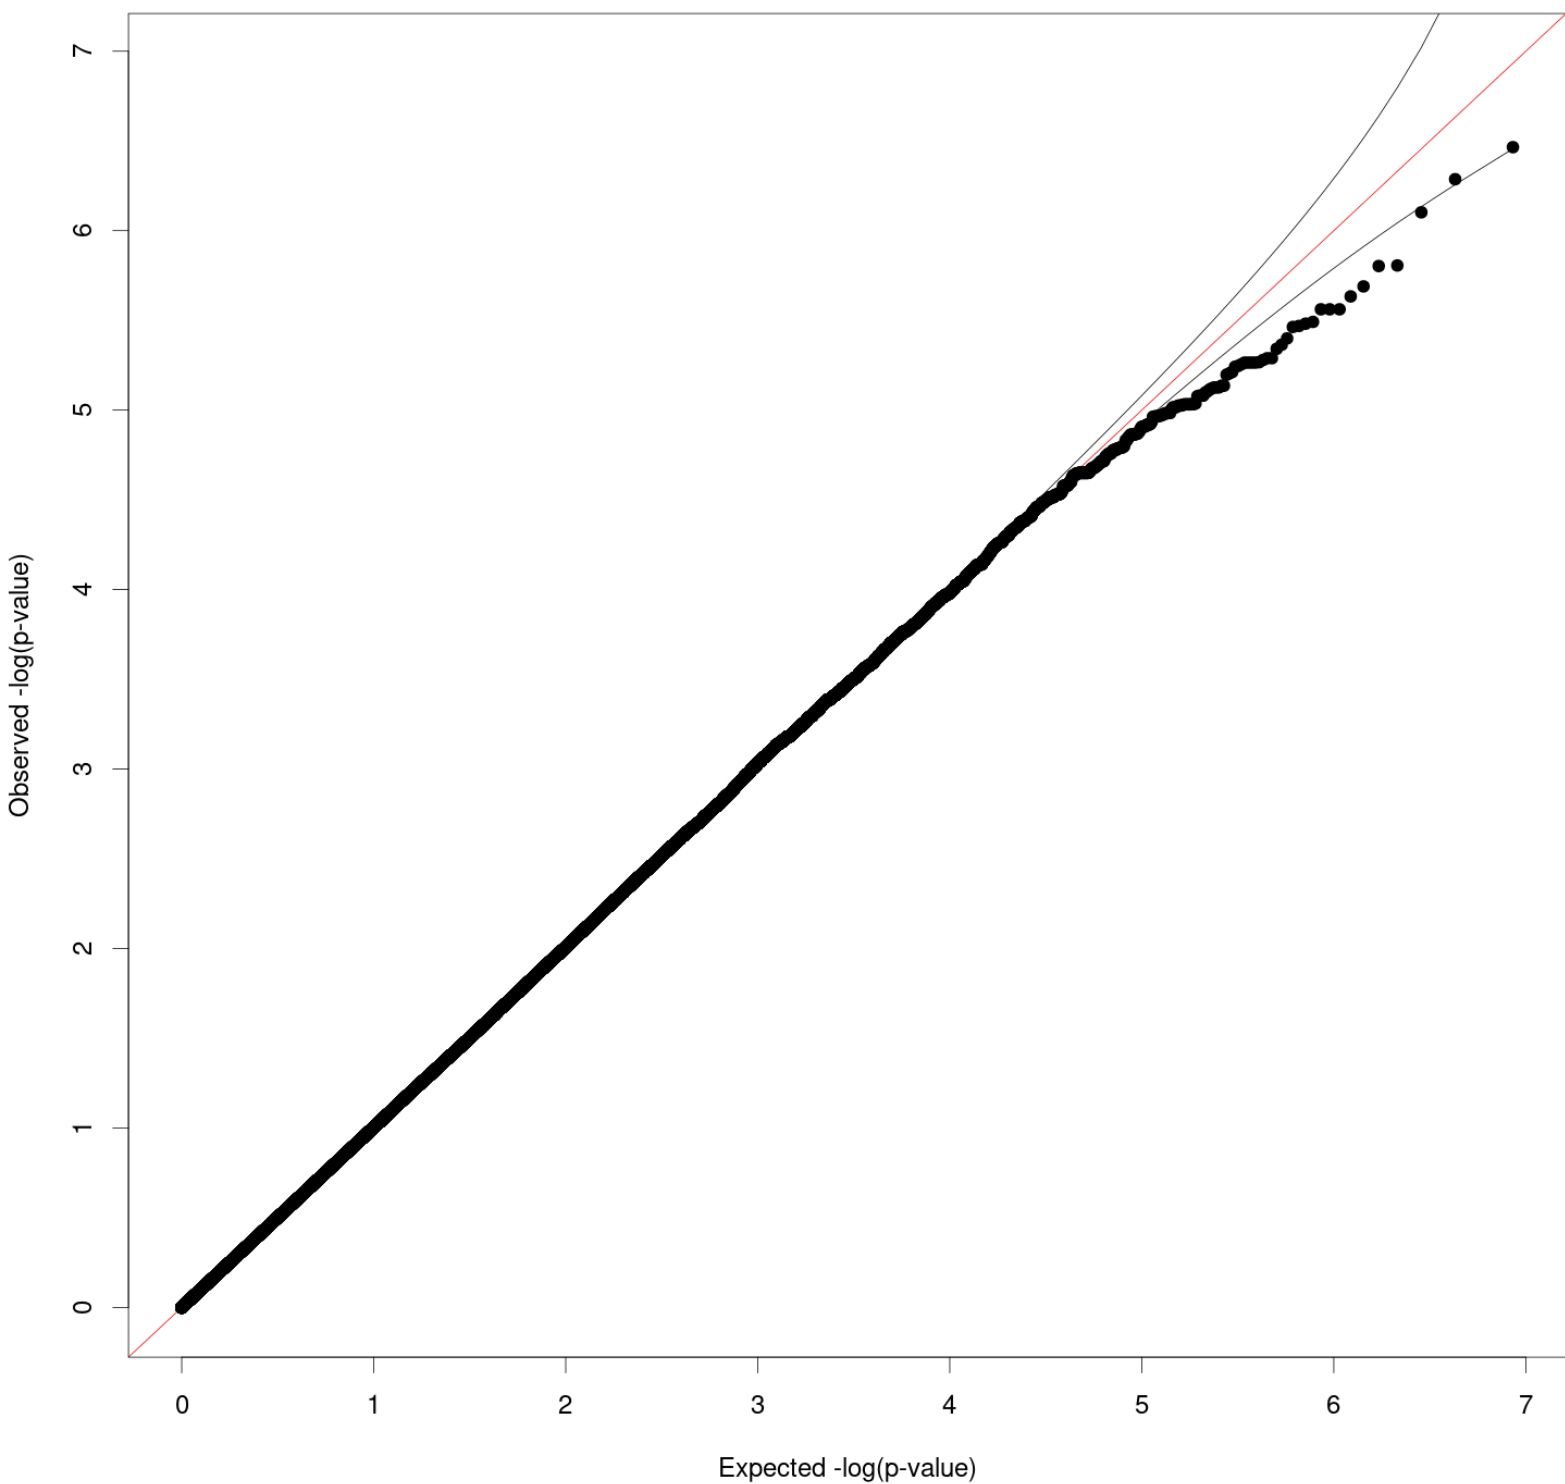

QQ plot for mz204.123\_t63.1, o-acetyl-l-carnitine  
inflation factor = 1.005

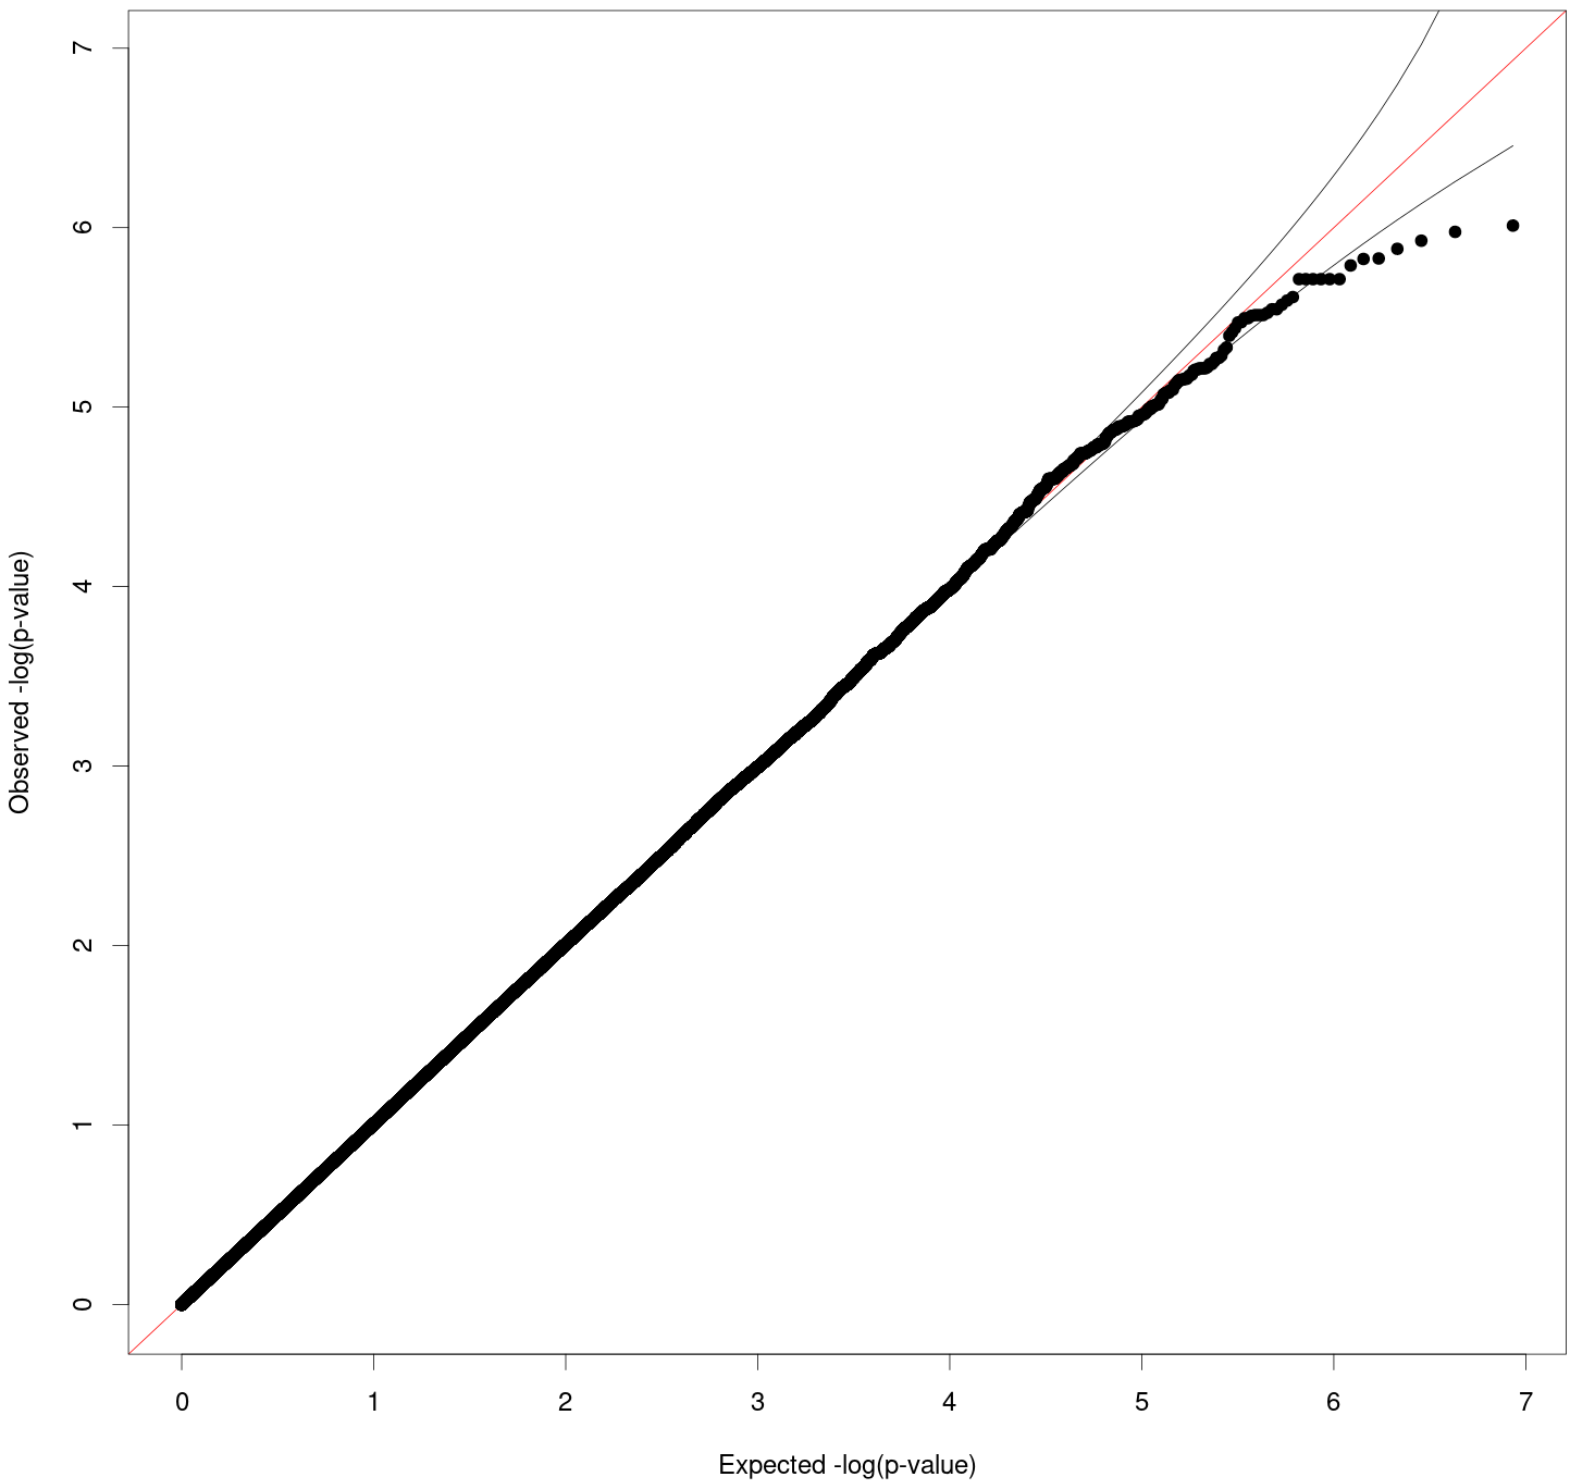

QQ plot for mz205.0972\_t45.9, tryptophan  
inflation factor = 0.9985

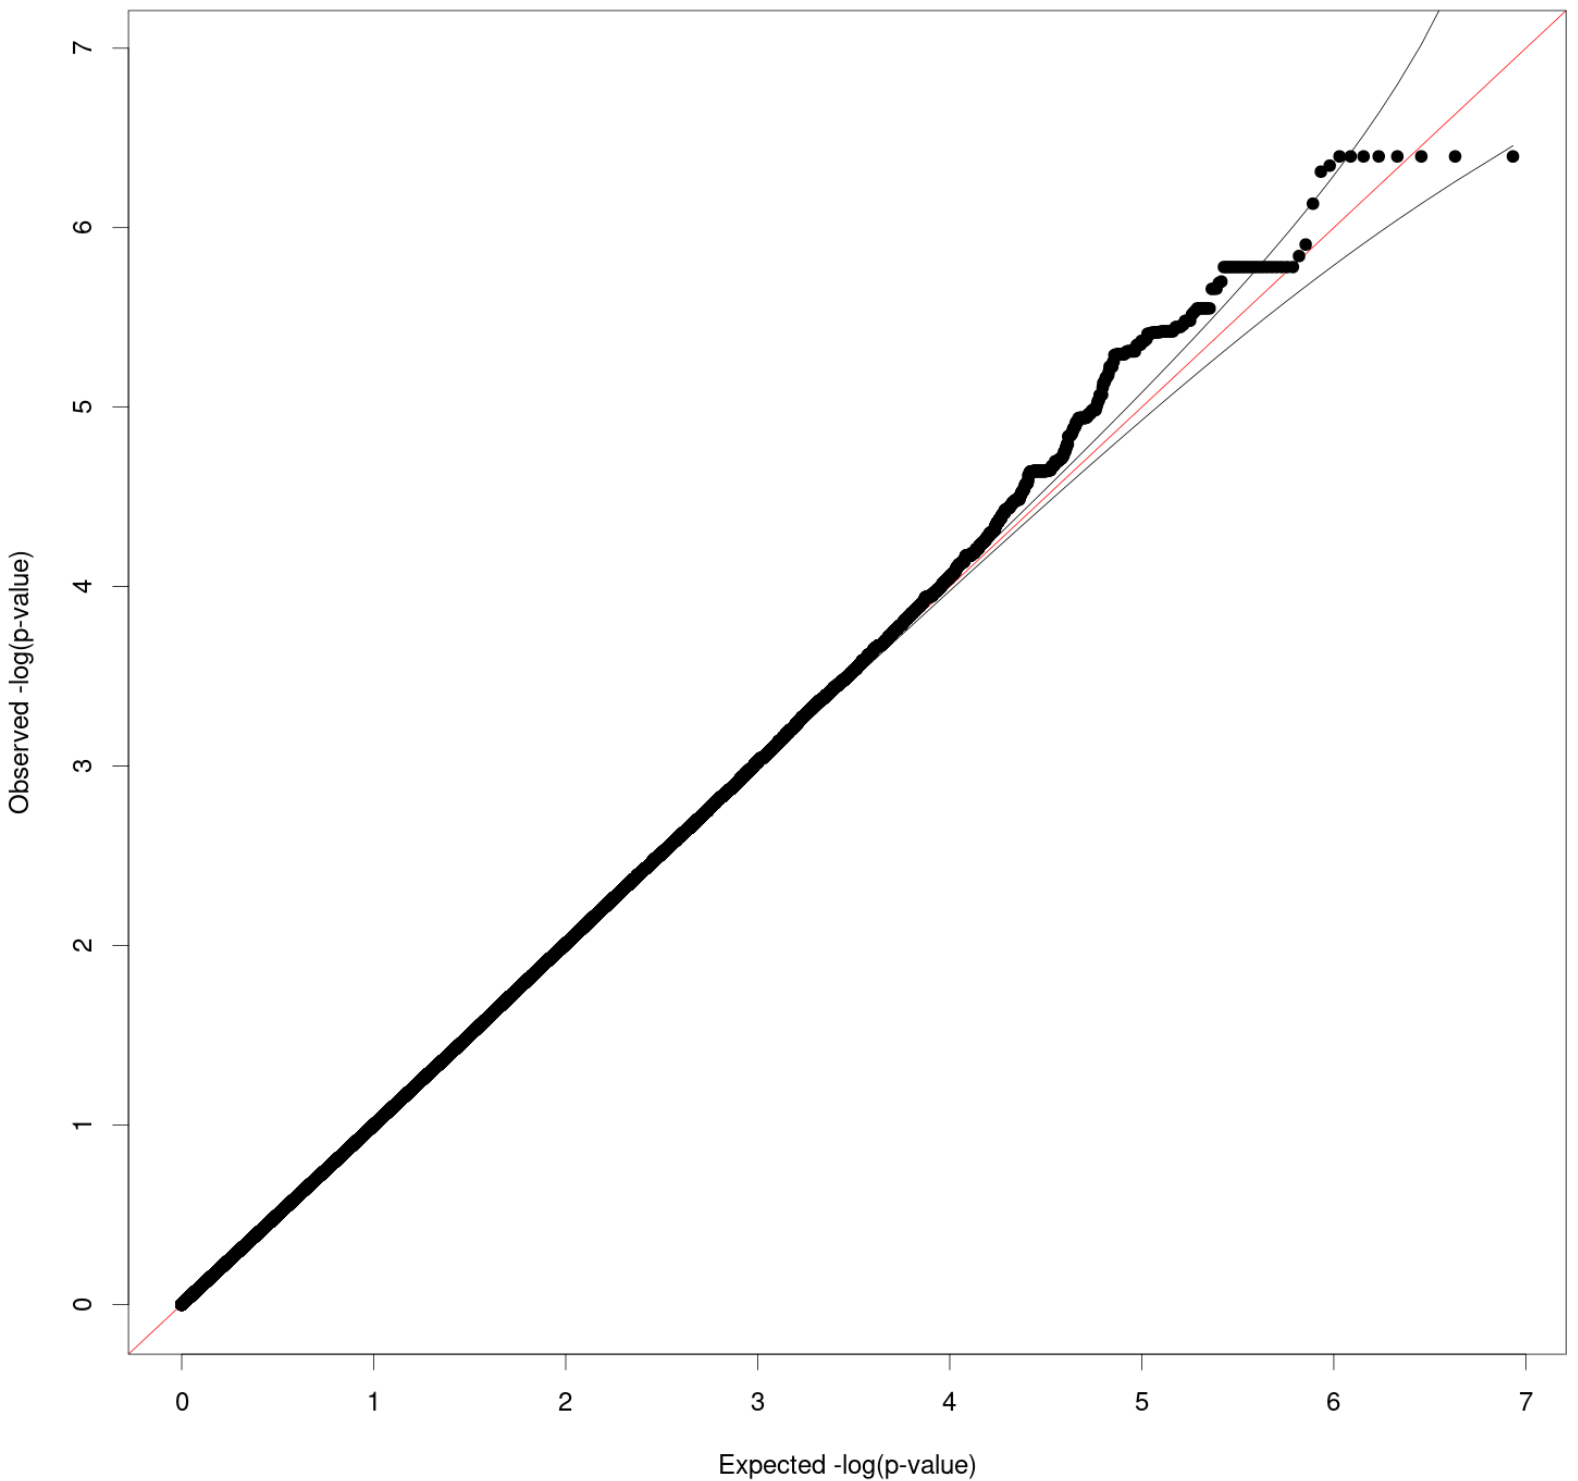



QQ plot for mz206.0825\_t46.2, n-acetyl-l-phenylalanine  
inflation factor = 1.011

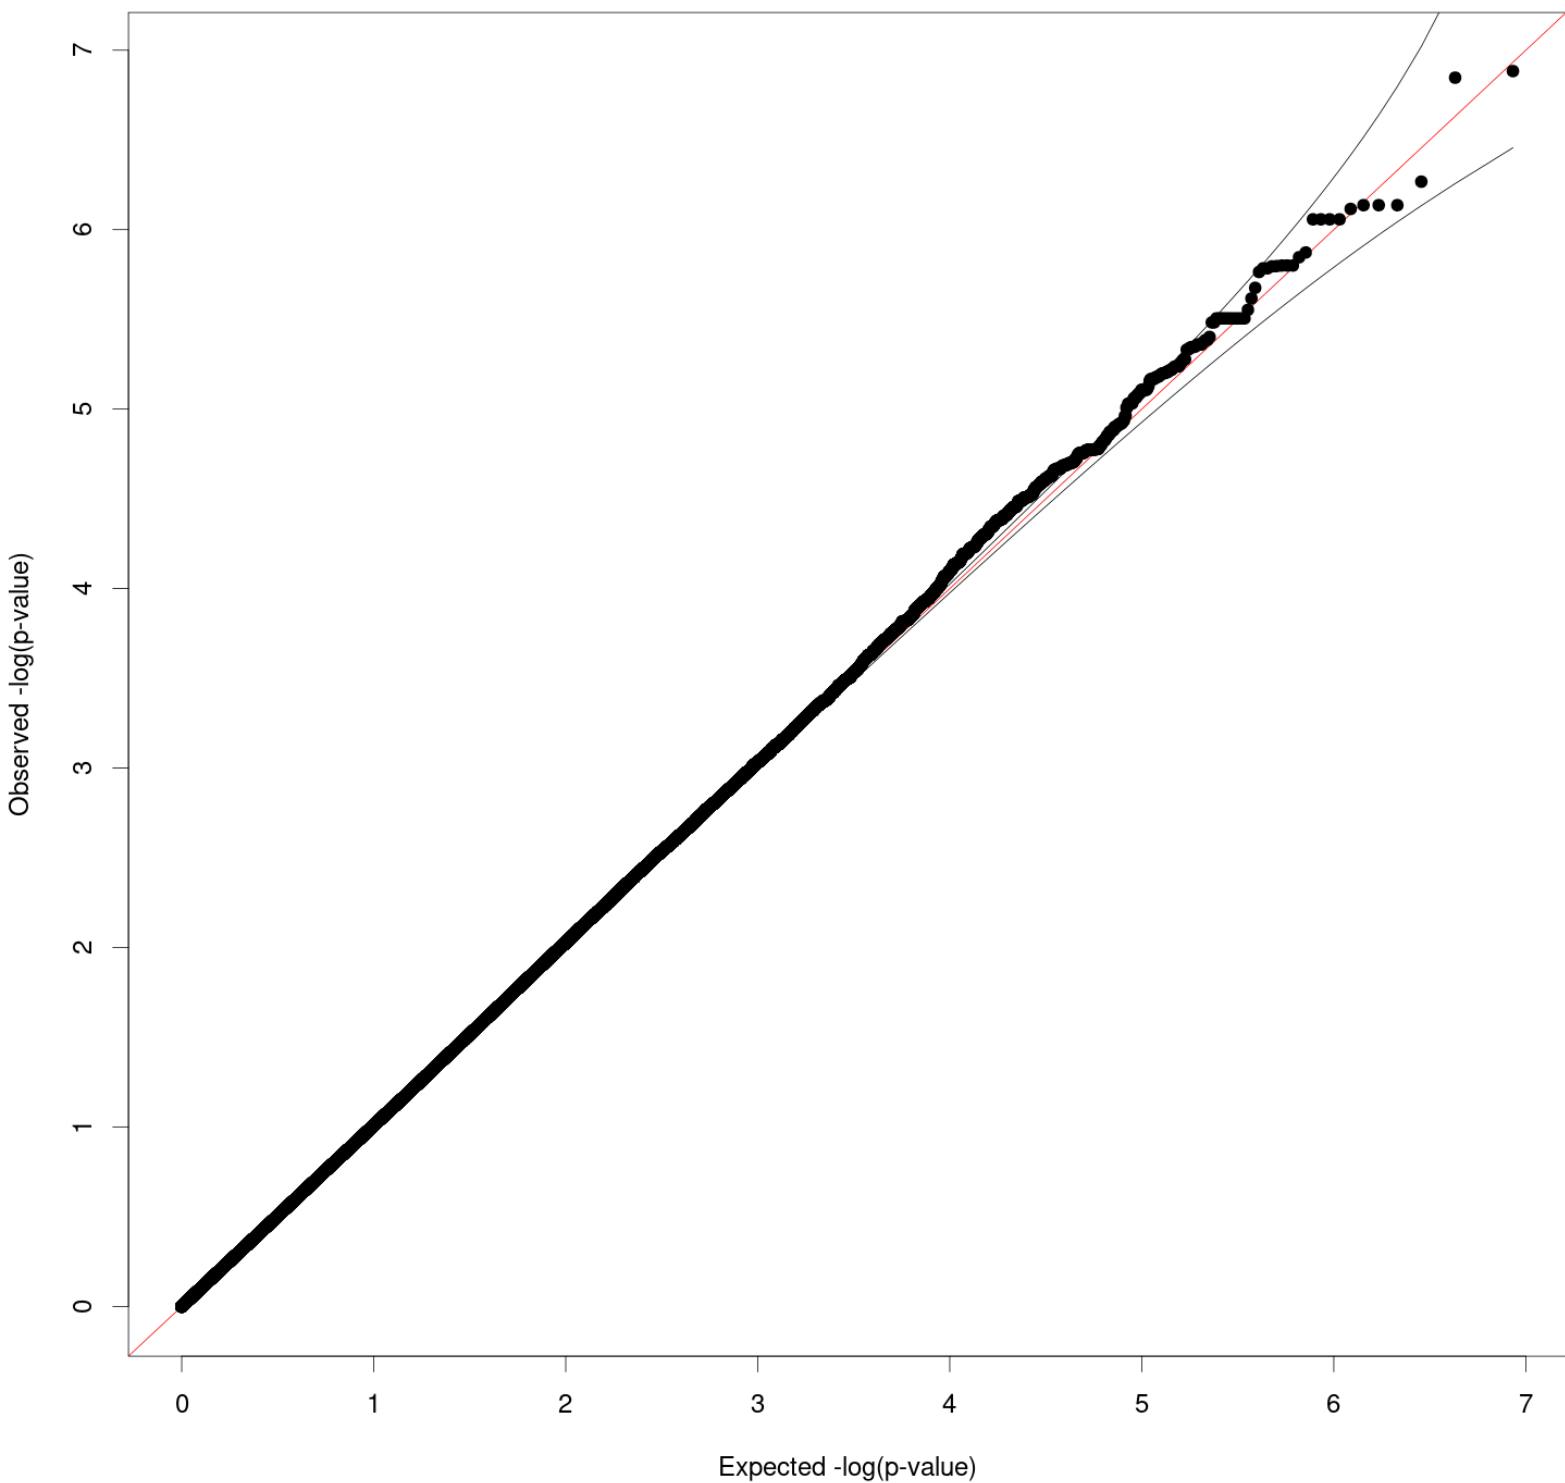

QQ plot for mz209.0308\_t34.2, d-saccharic acid  
inflation factor = 1.006

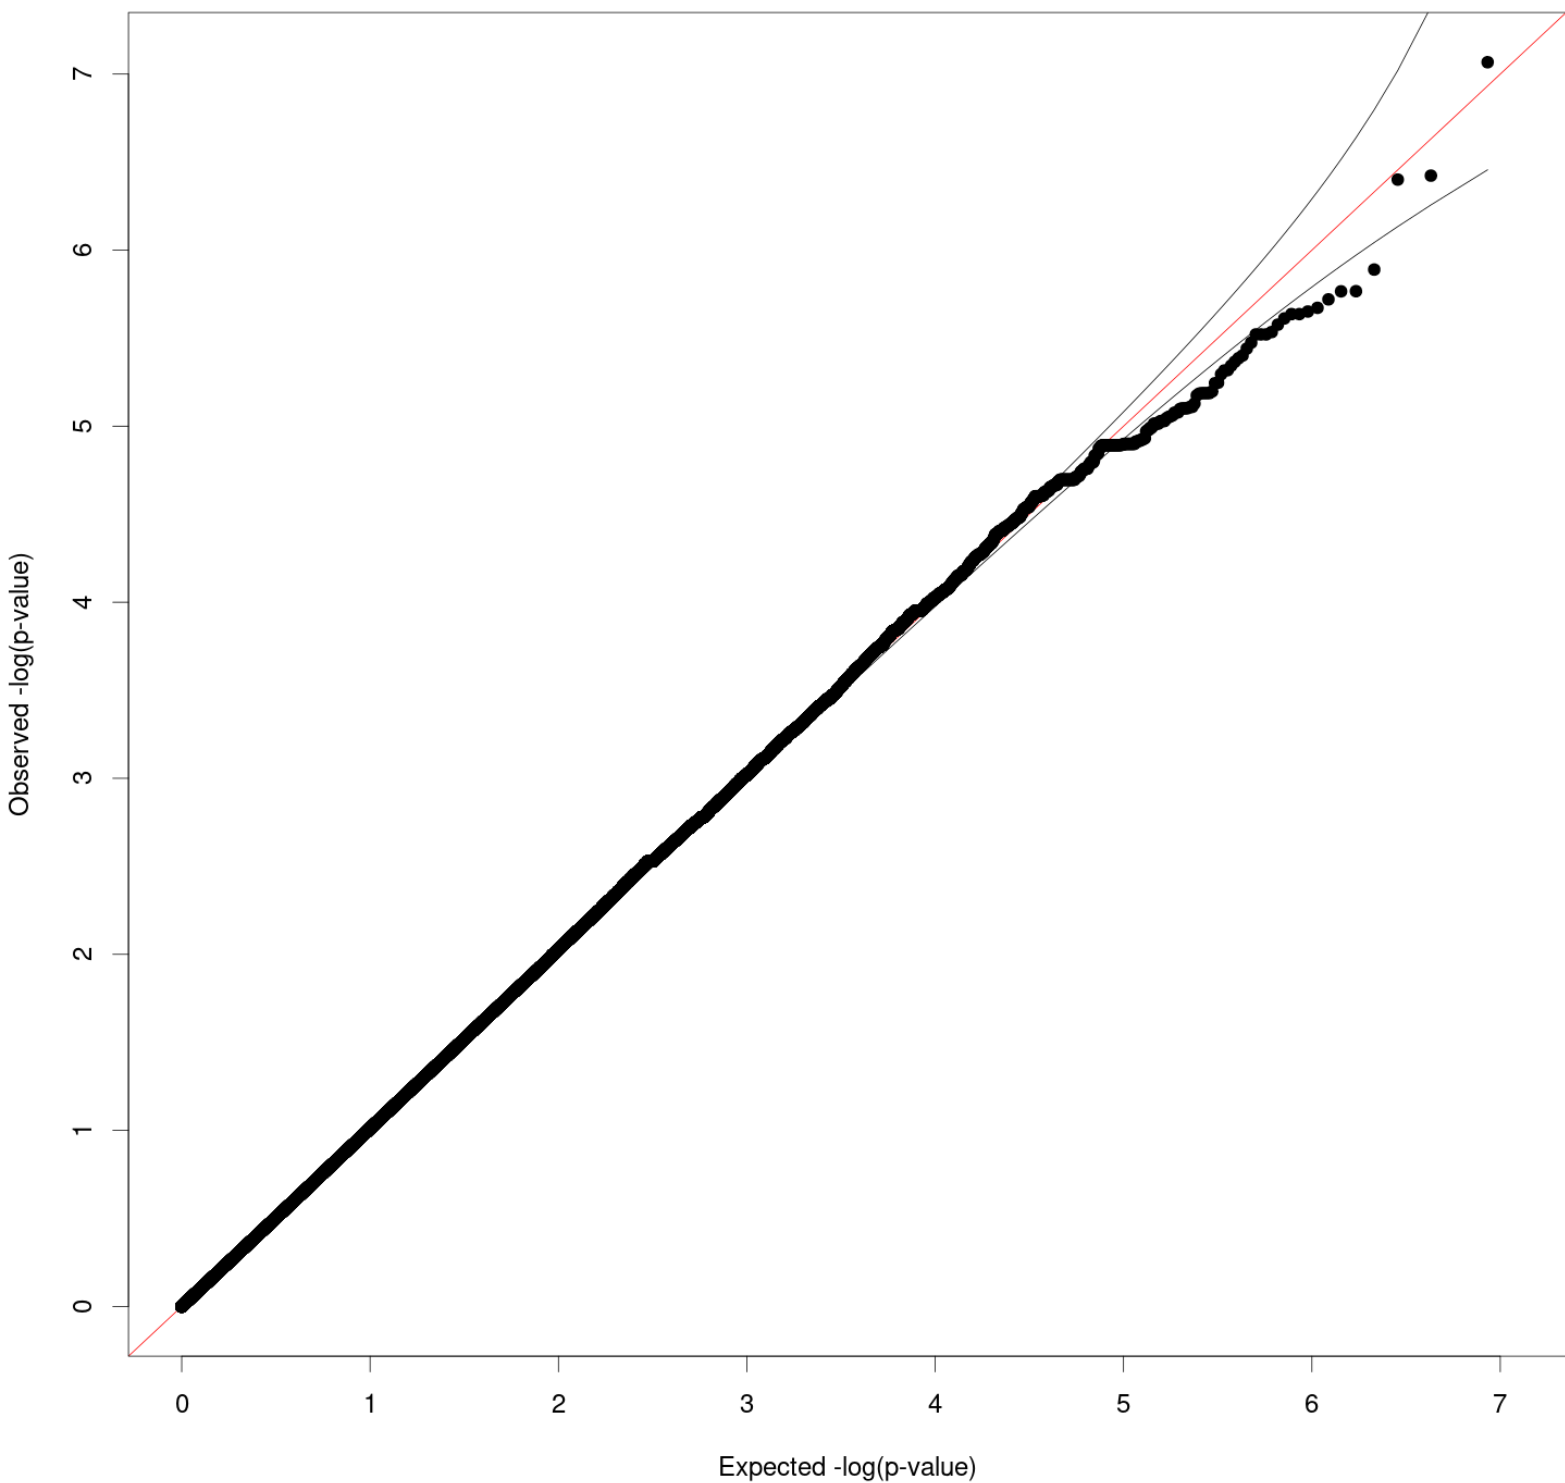

QQ plot for mz209.0921\_t47.2, kynurenine  
inflation factor = 0.9992

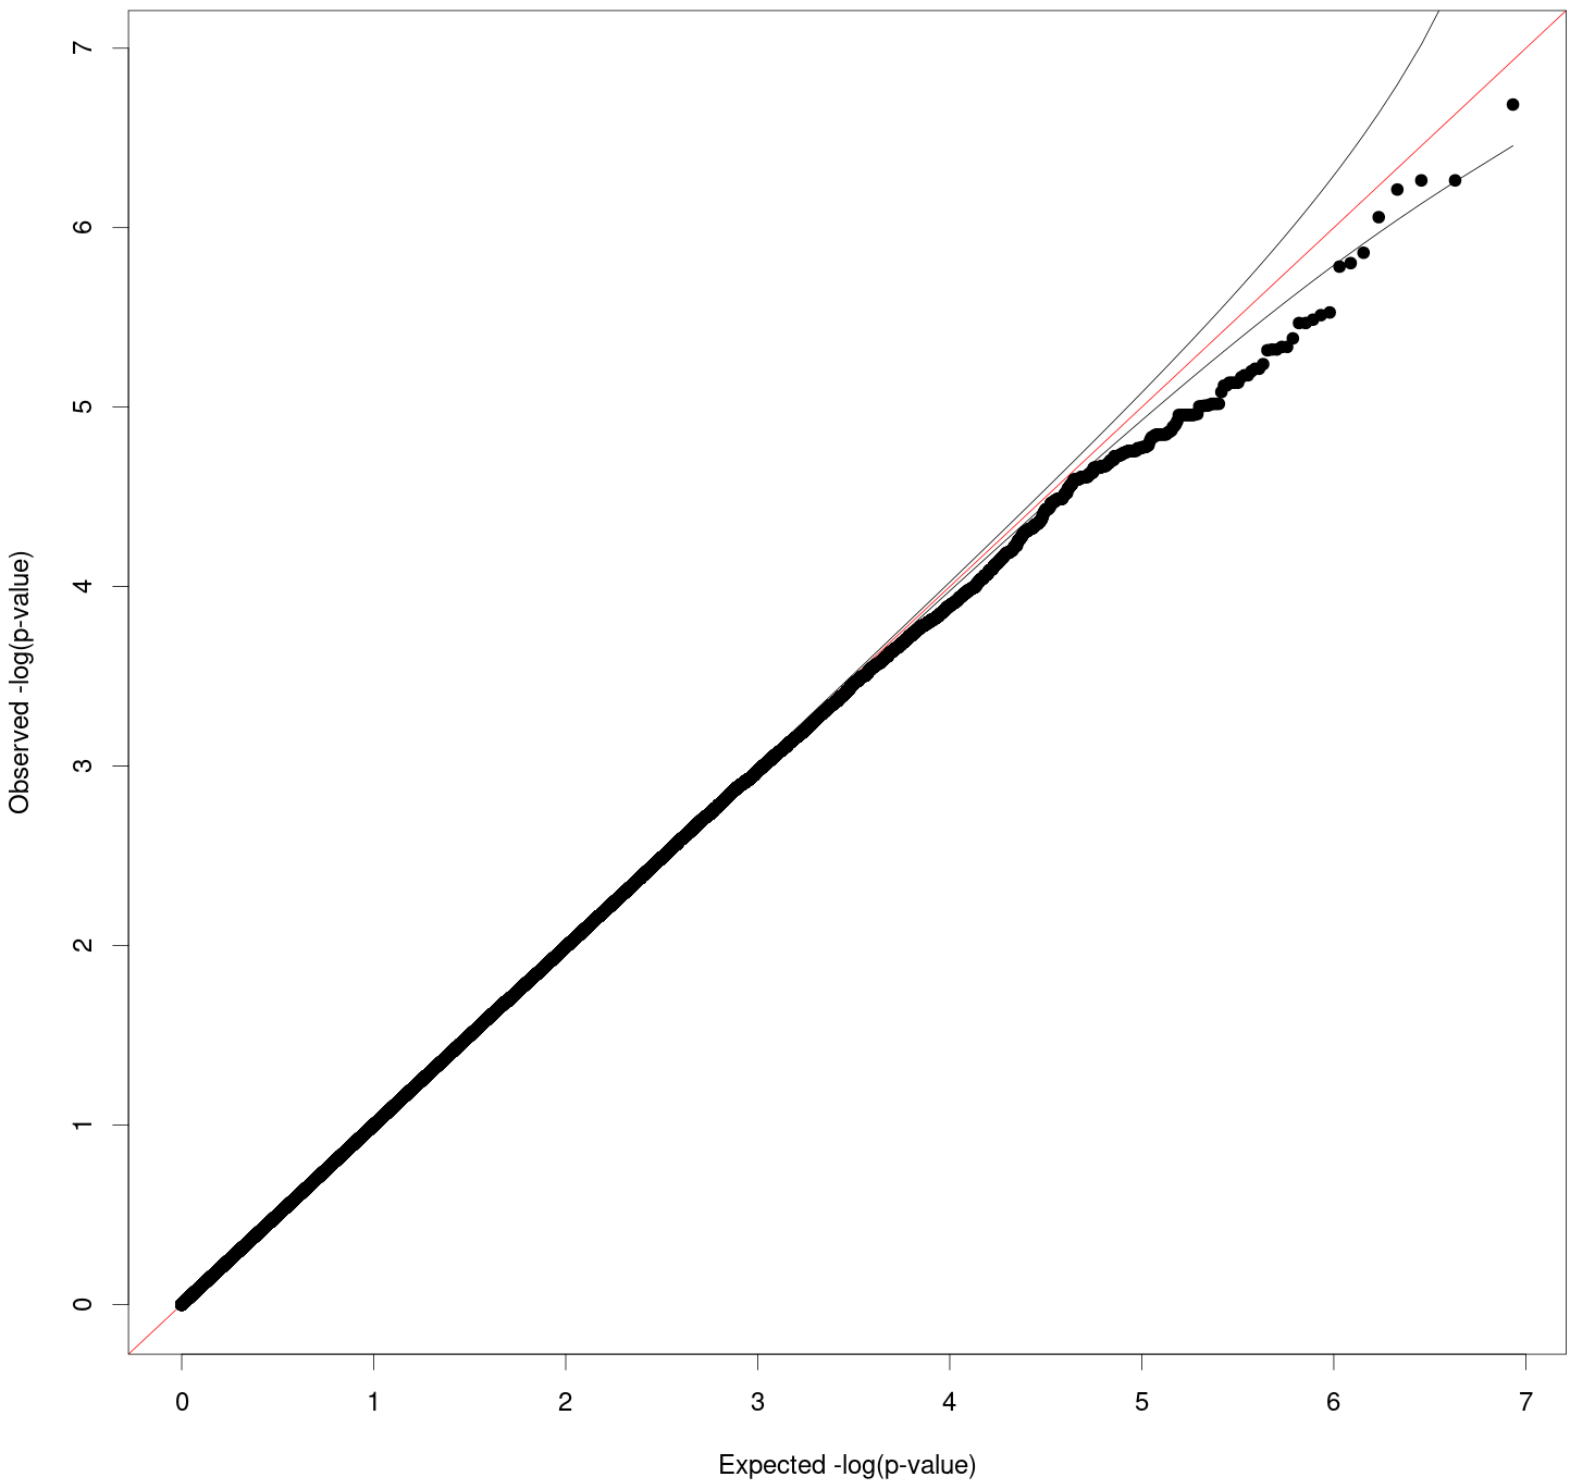

QQ plot for mz212.0433\_t126.8, phosphocreatine  
inflation factor = 0.9994

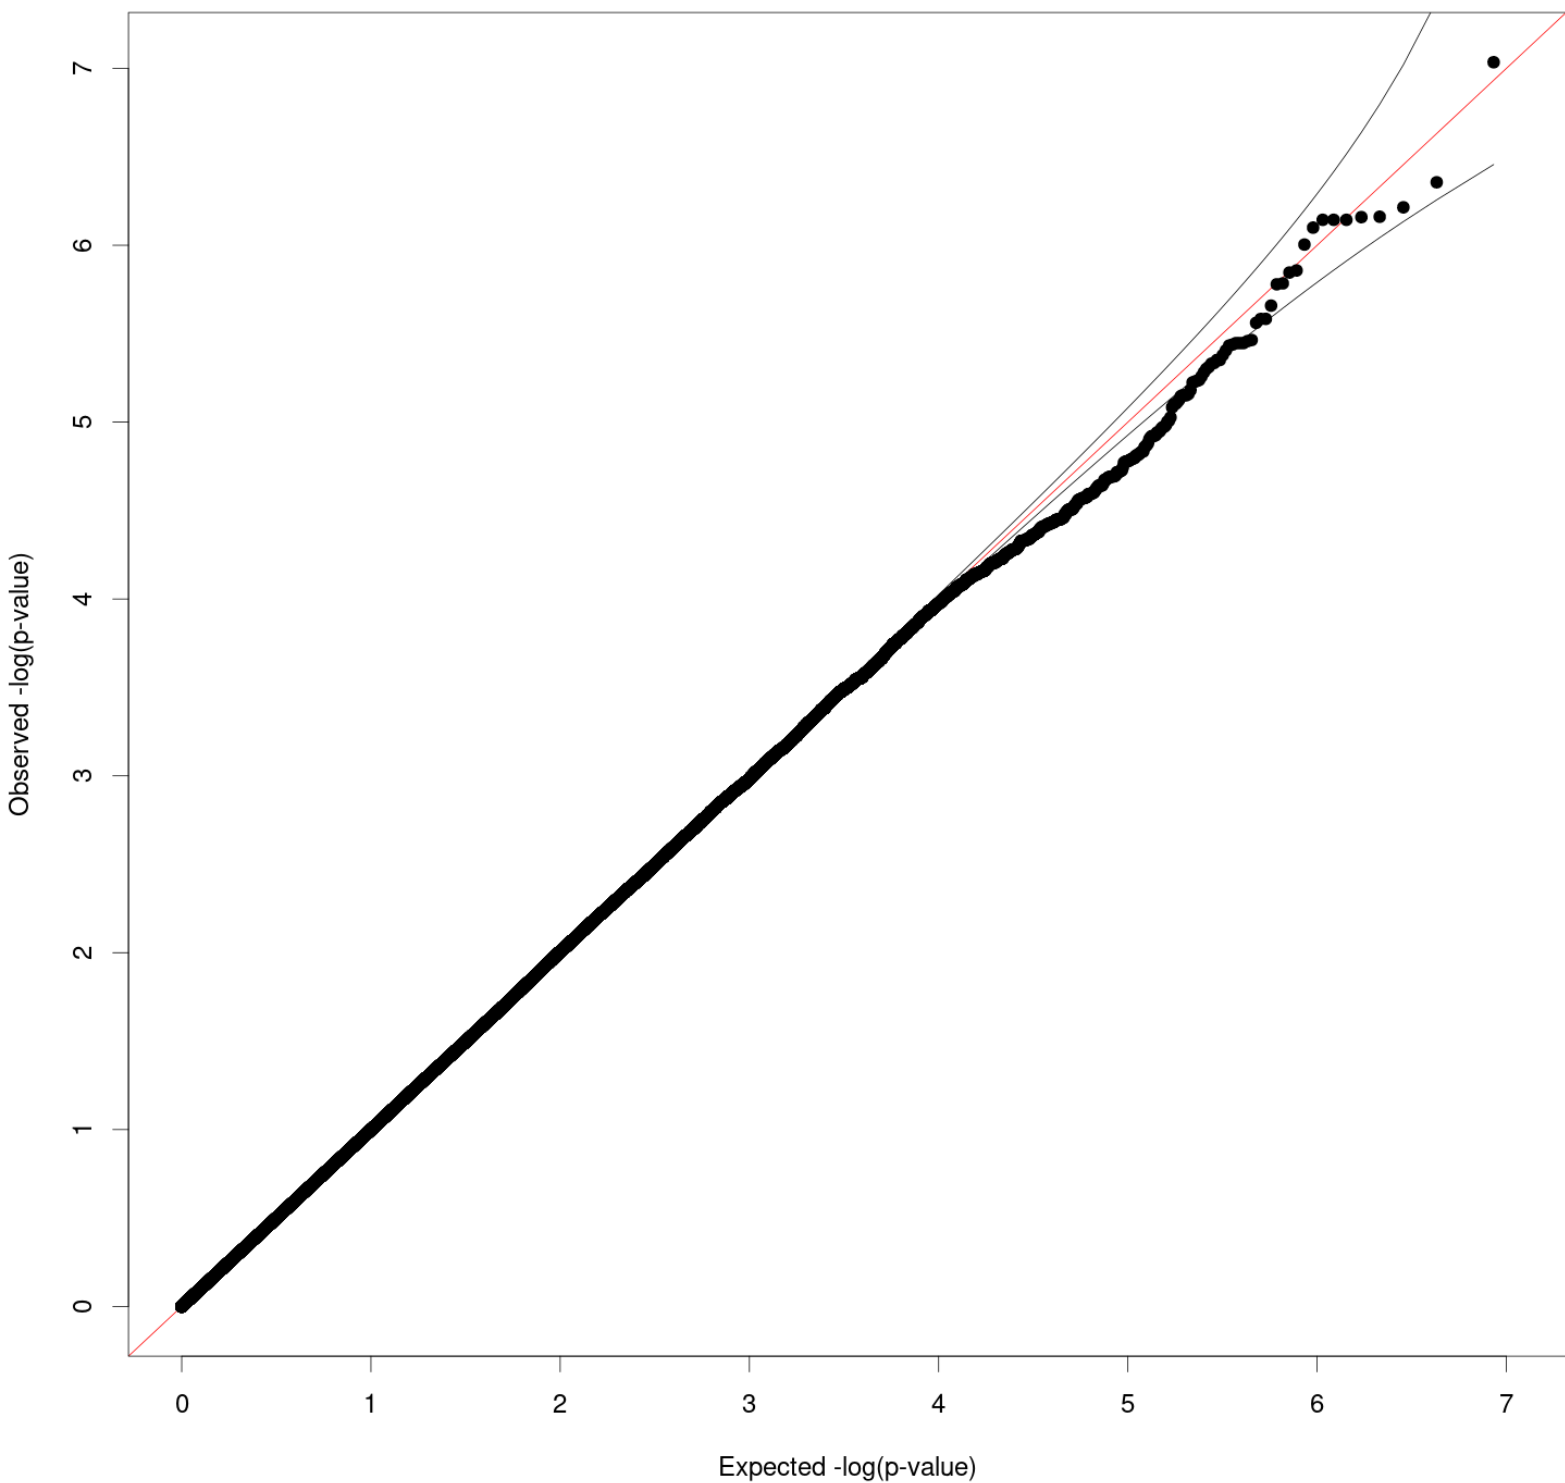

QQ plot for mz218.1037\_t23.6, d-pantothenic acid  
inflation factor = 1

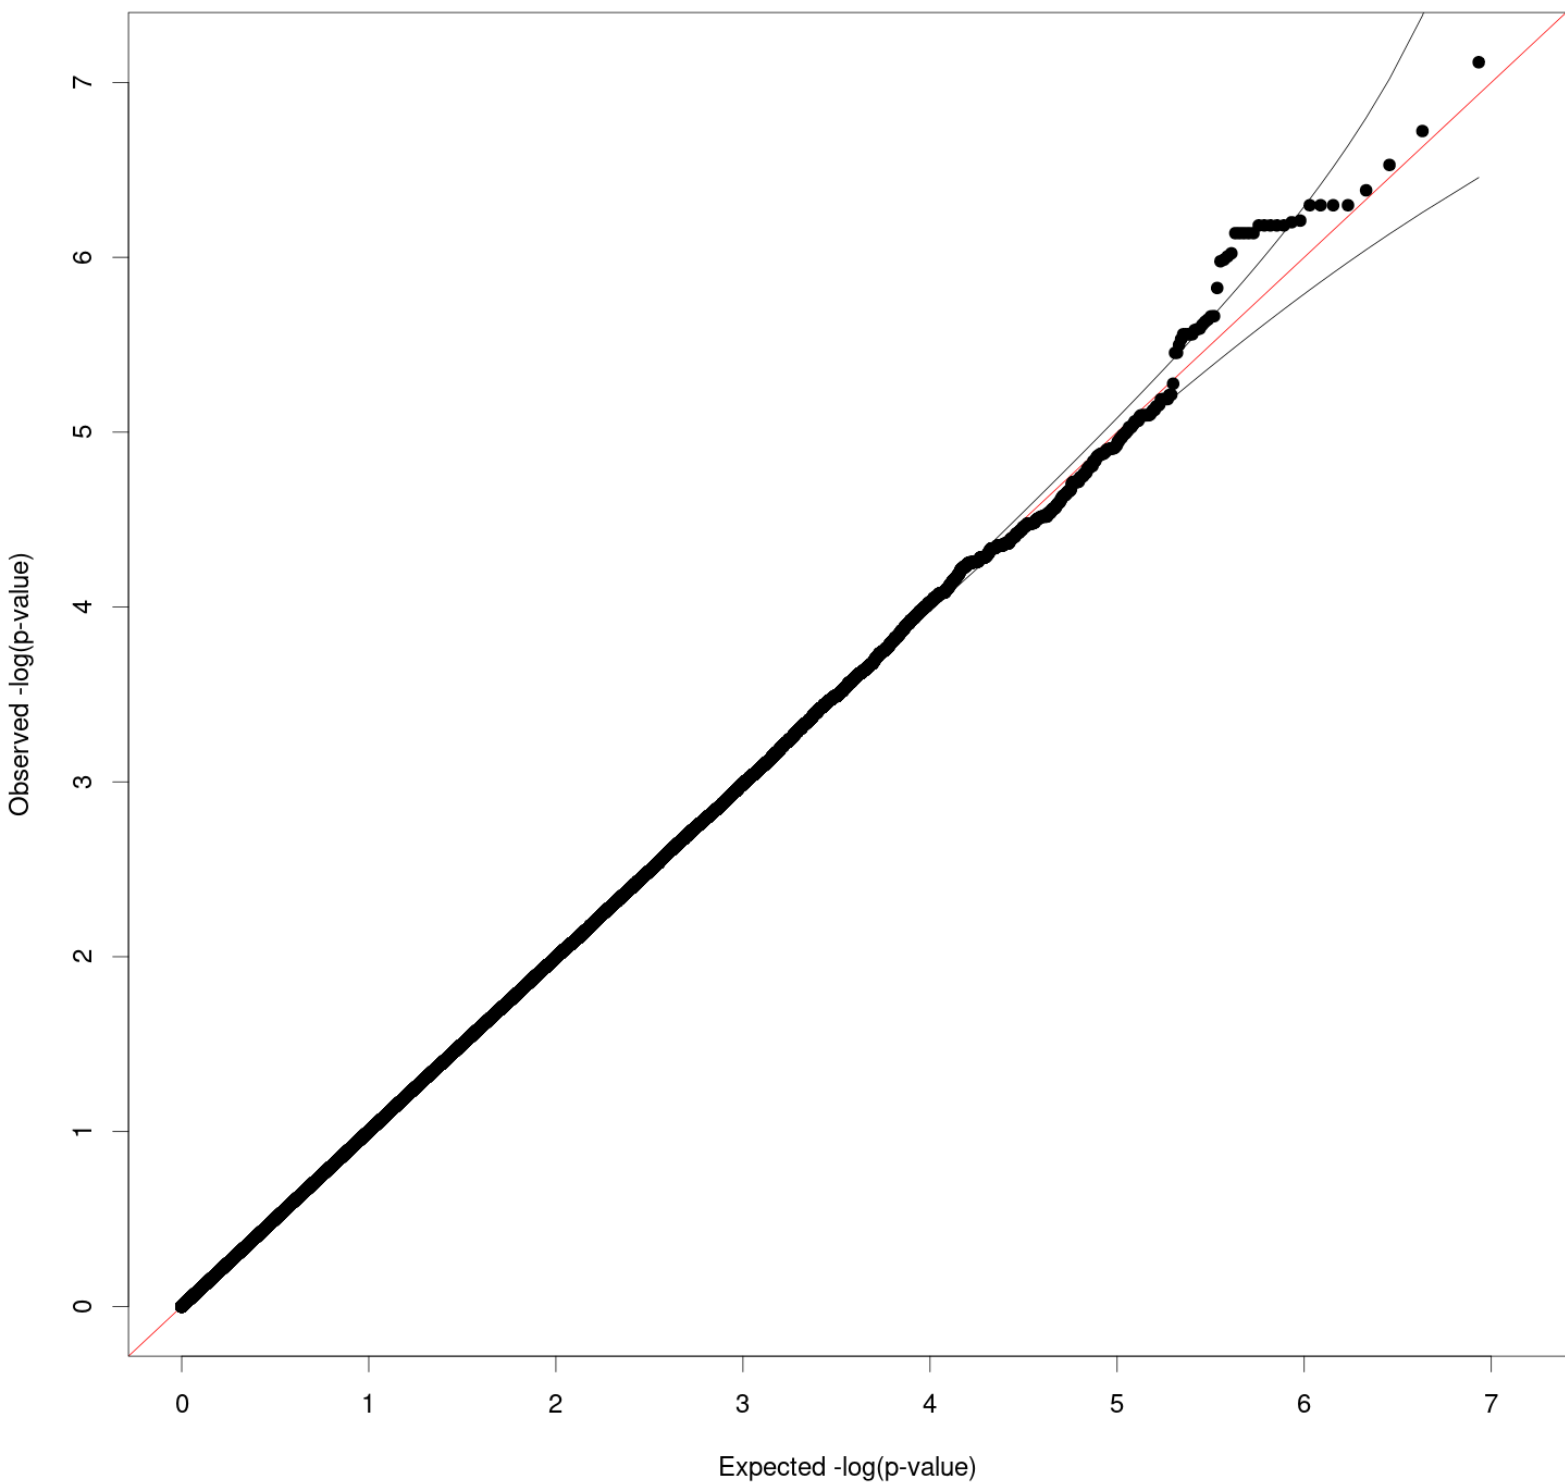

QQ plot for mz220.1182\_t64.5, d-pantothenic acid  
inflation factor = 0.9963

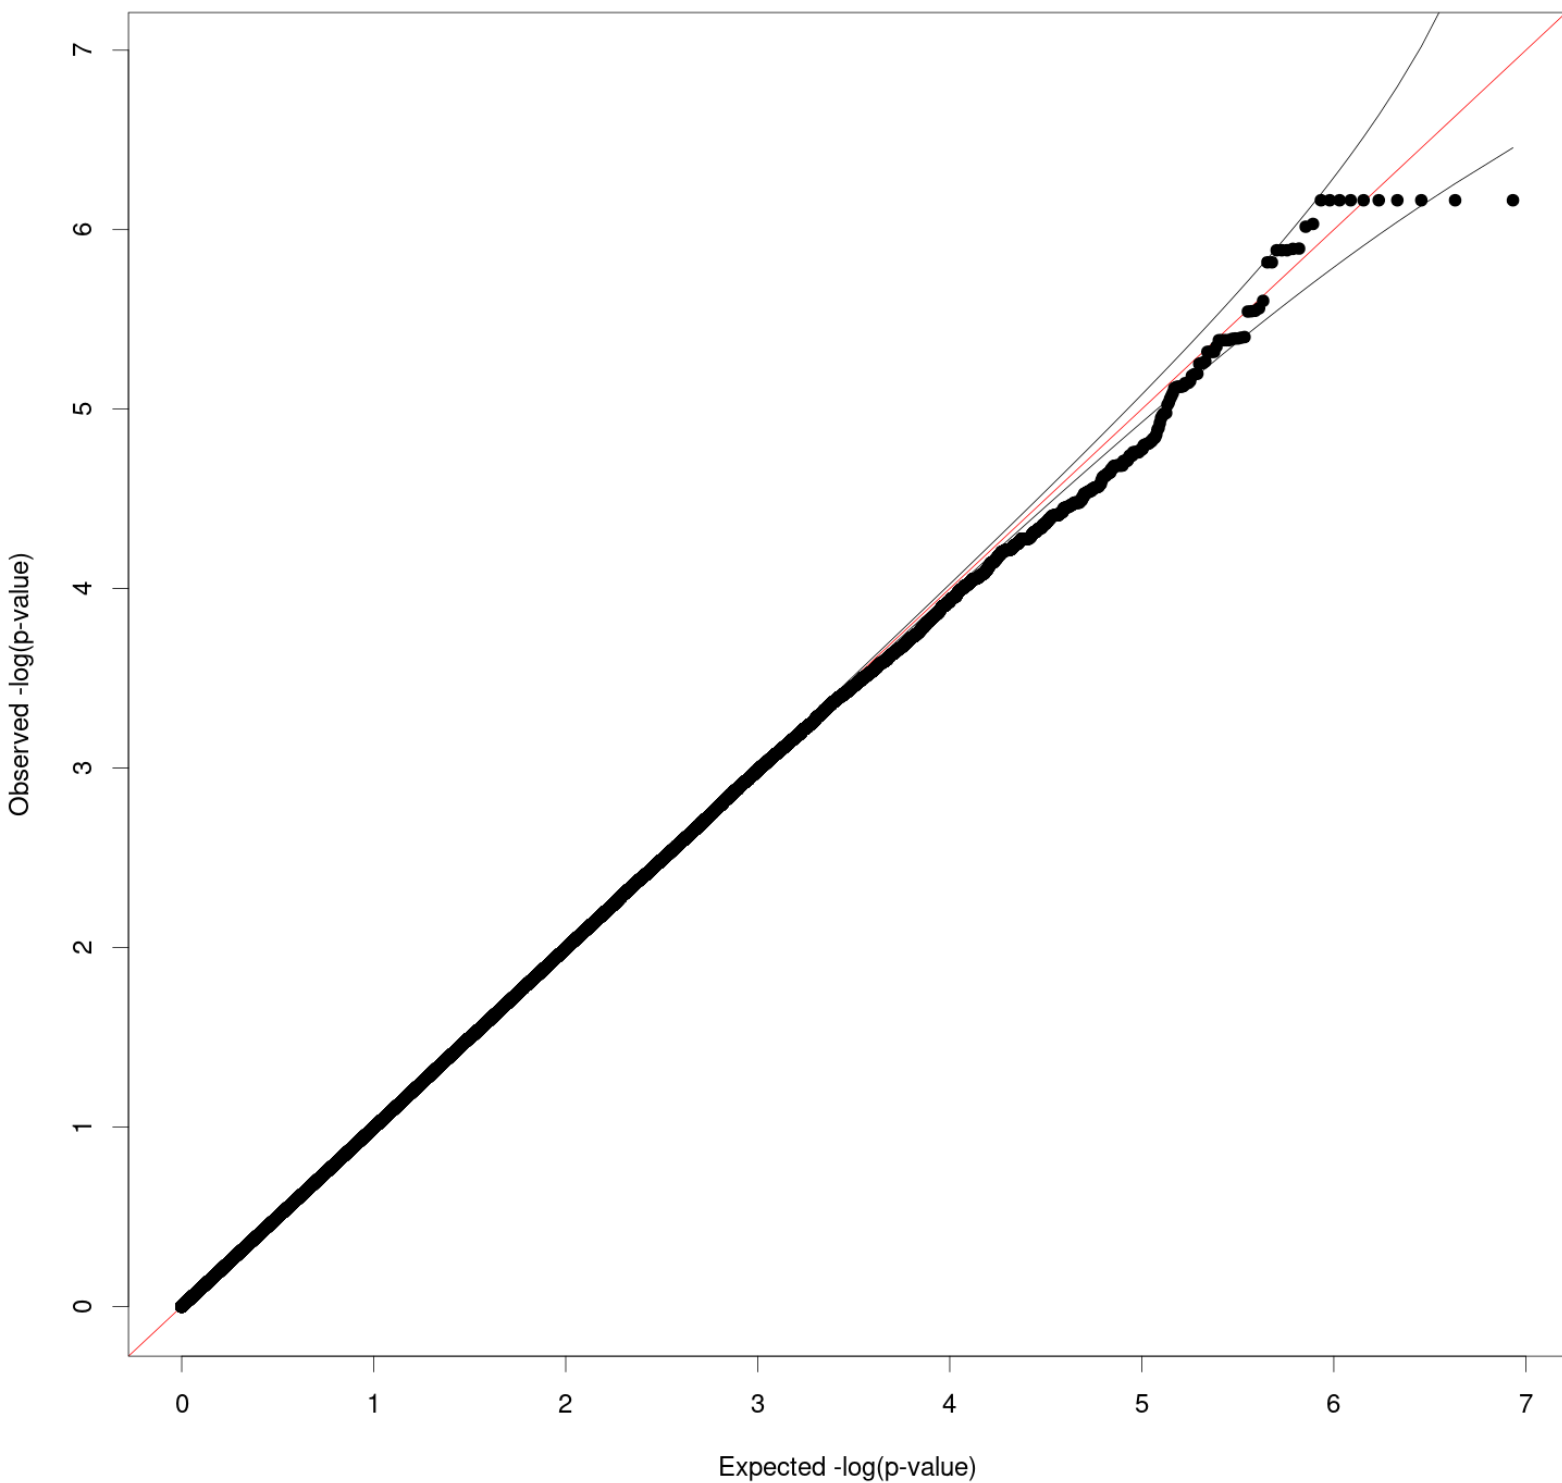

QQ plot for mz221.092\_t44.8, 5-hydroxy-L-tryptophan  
inflation factor = 1.006

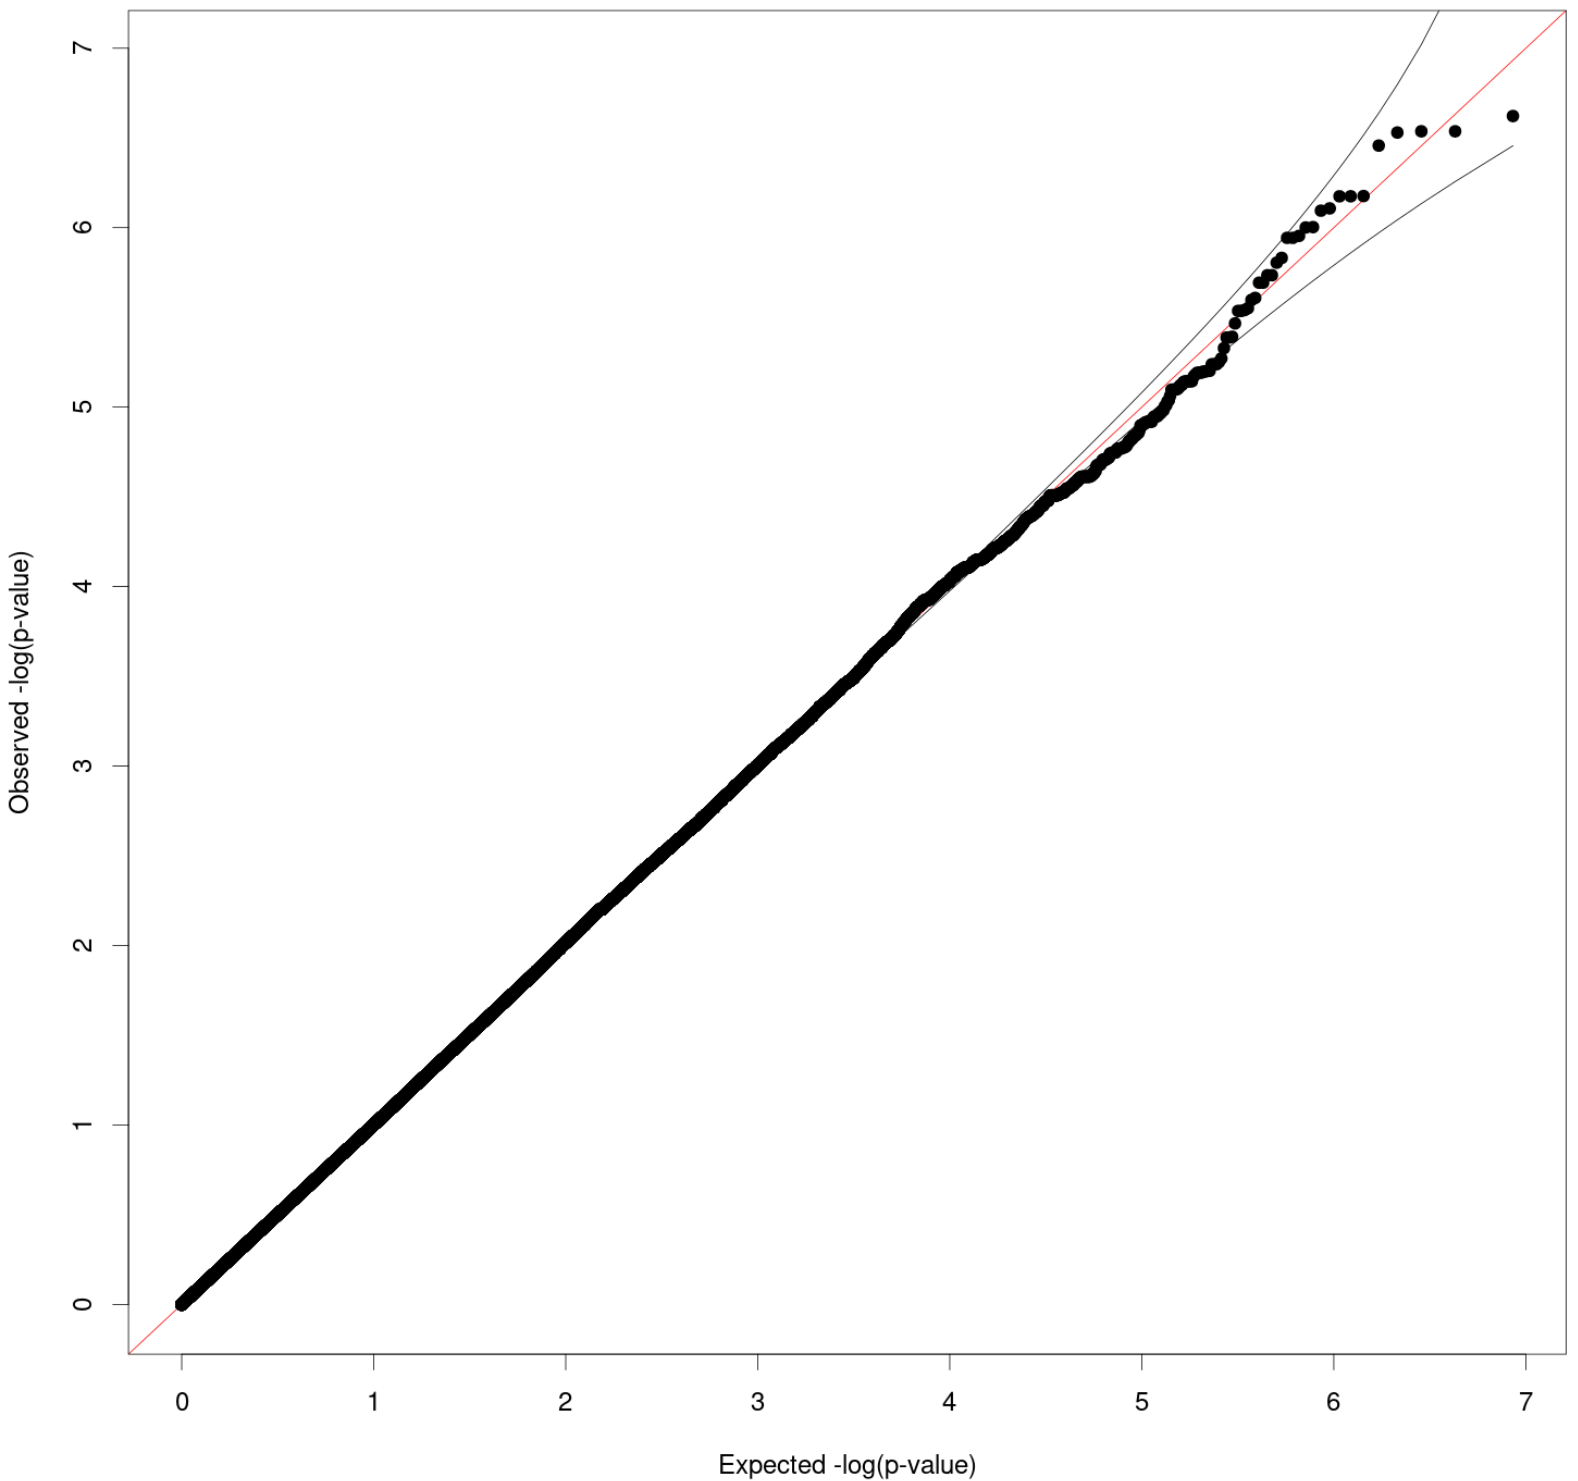

QQ plot for mz222.0962\_t43.6, n-acetyl-d-glucosamine  
inflation factor = 1.001

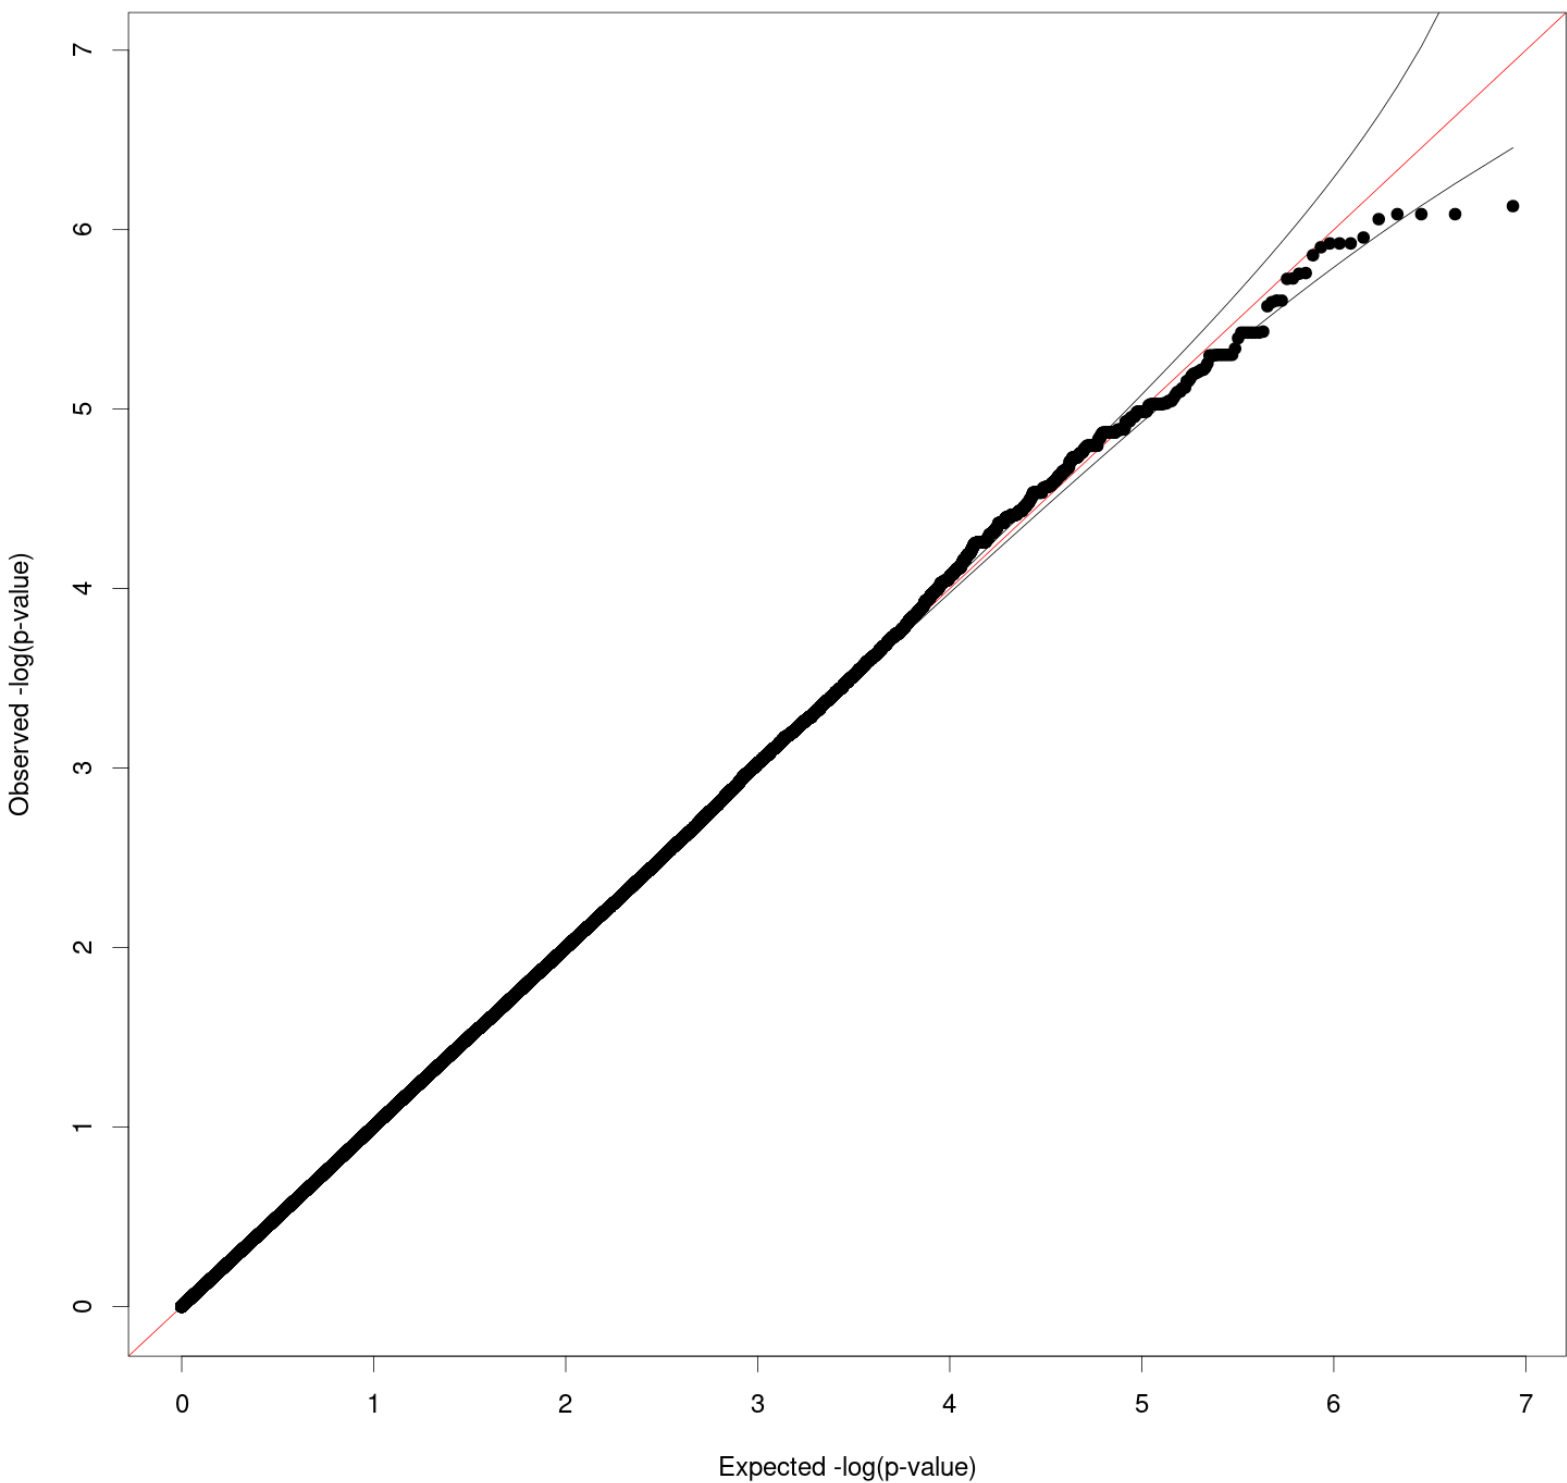



QQ plot for mz225.1484\_t26.7, methyl jasmonate  
inflation factor = 1.002

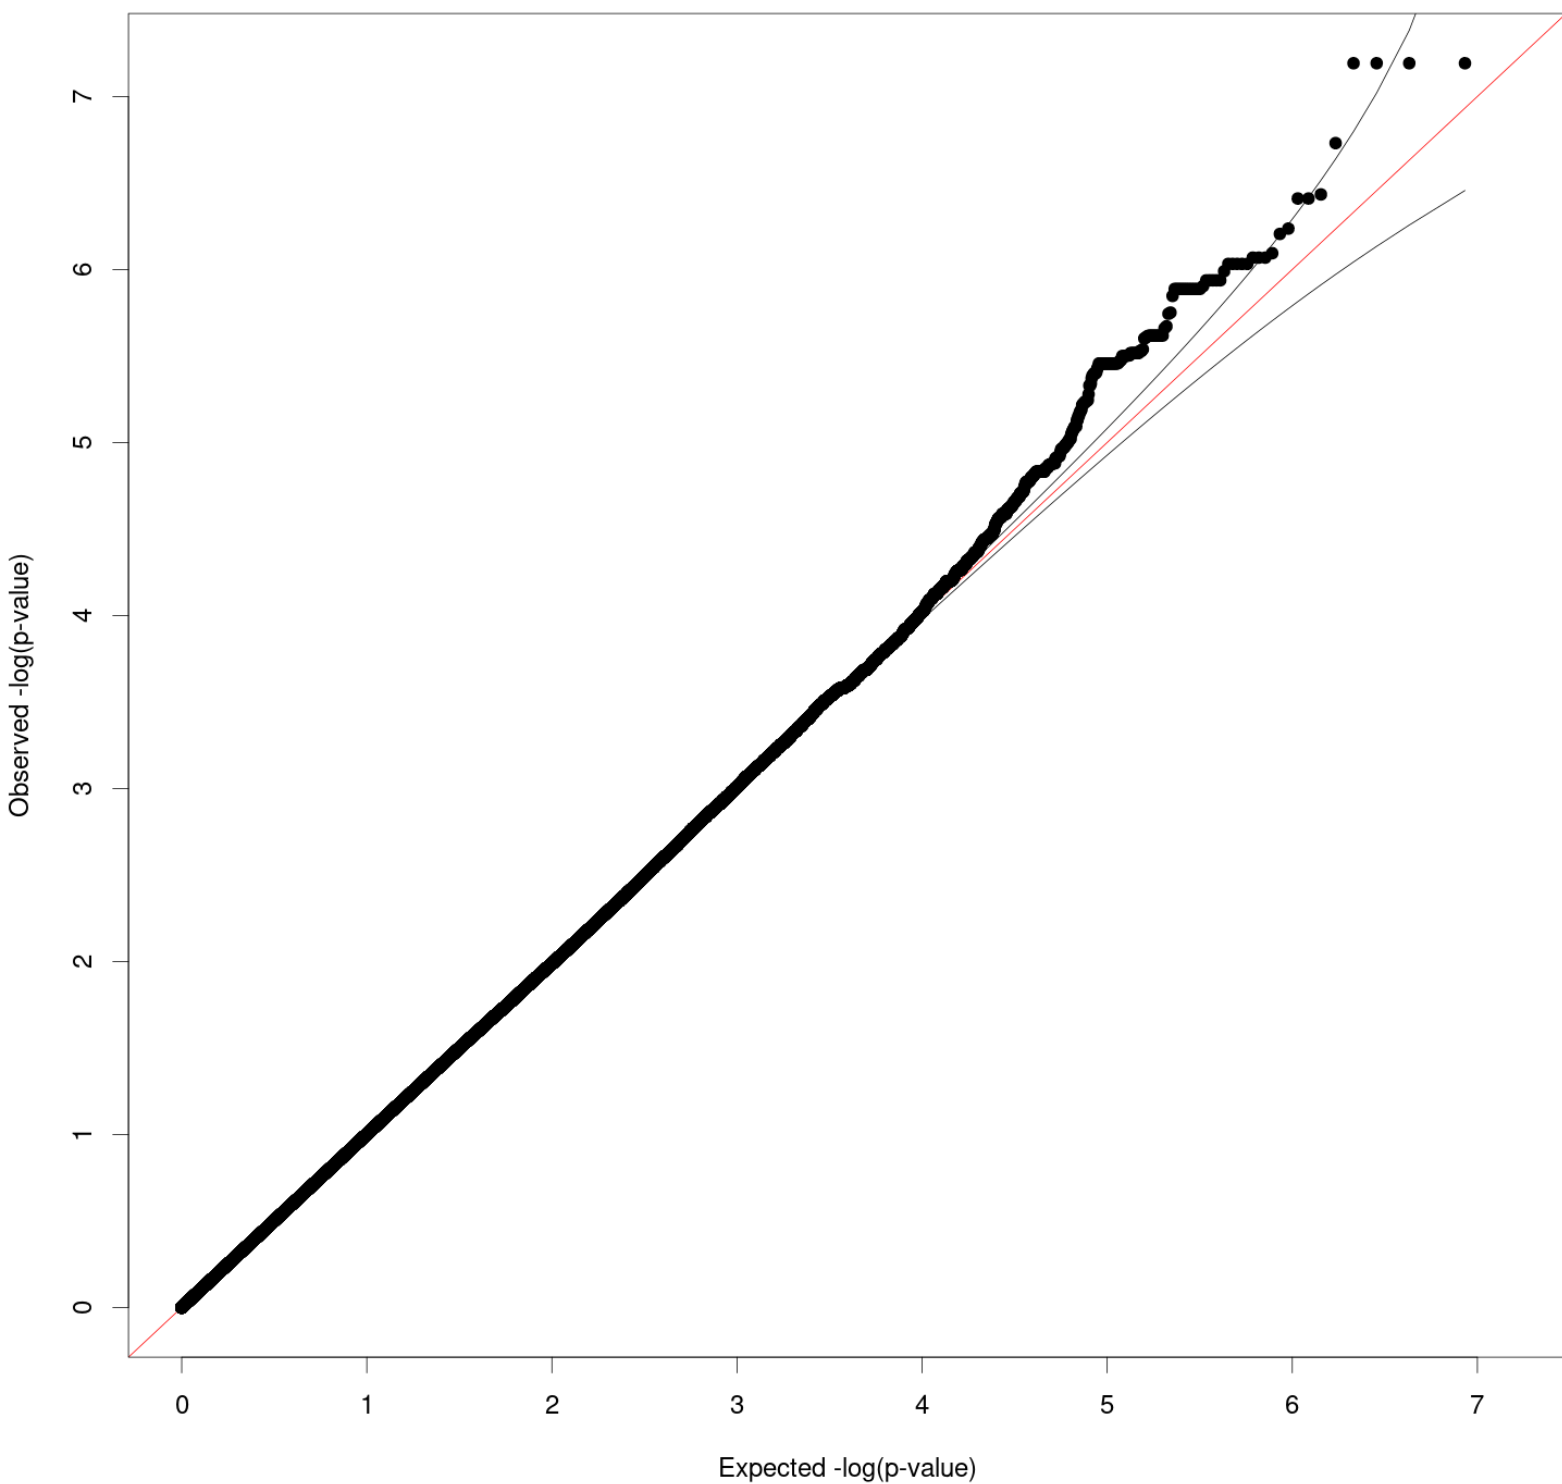

QQ plot for mz237.0362\_t73.2, quinate  
inflation factor = 1

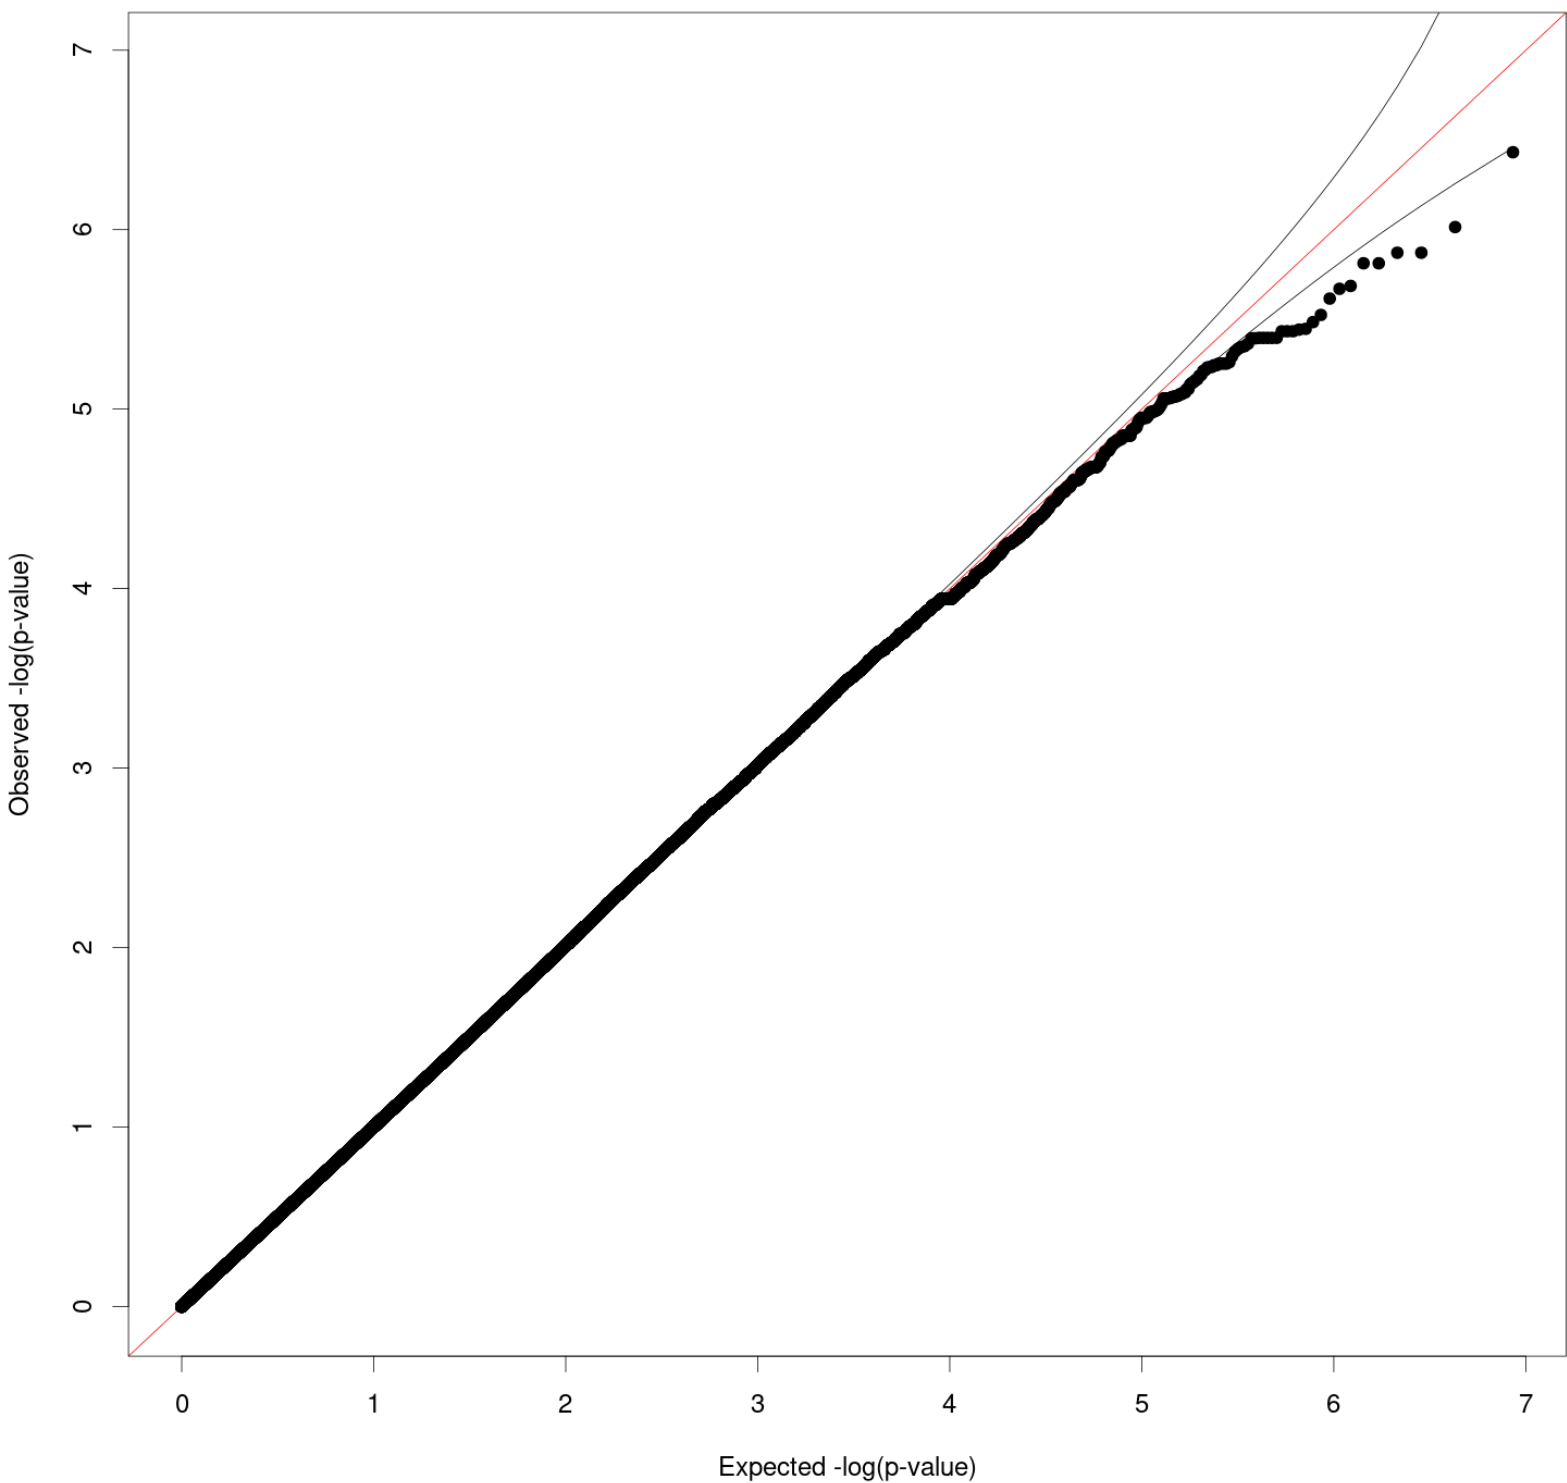

QQ plot for mz239.017\_t24.2, cystine  
inflation factor = 1.002

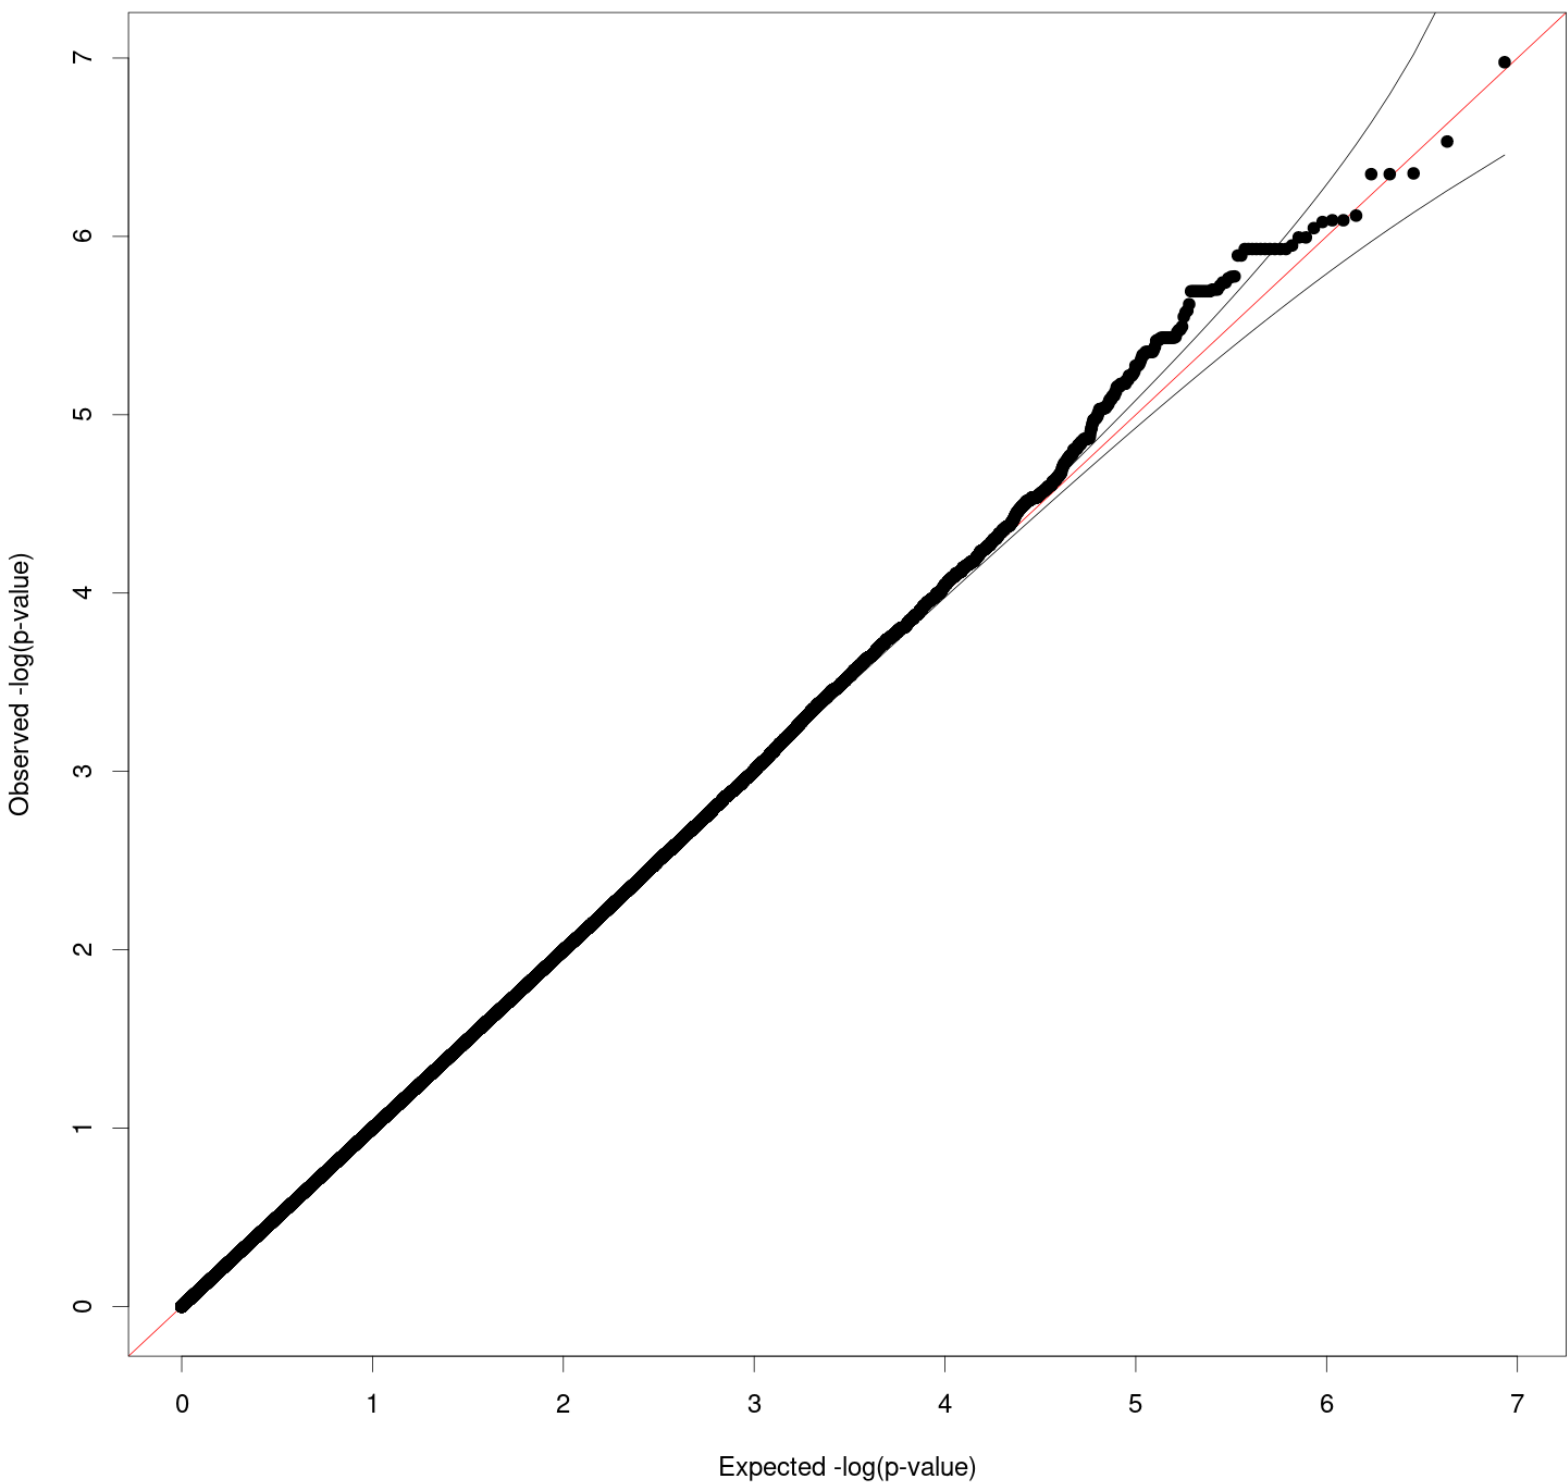

QQ plot for mz241.0311\_t181.3, cystine  
inflation factor = 0.9934

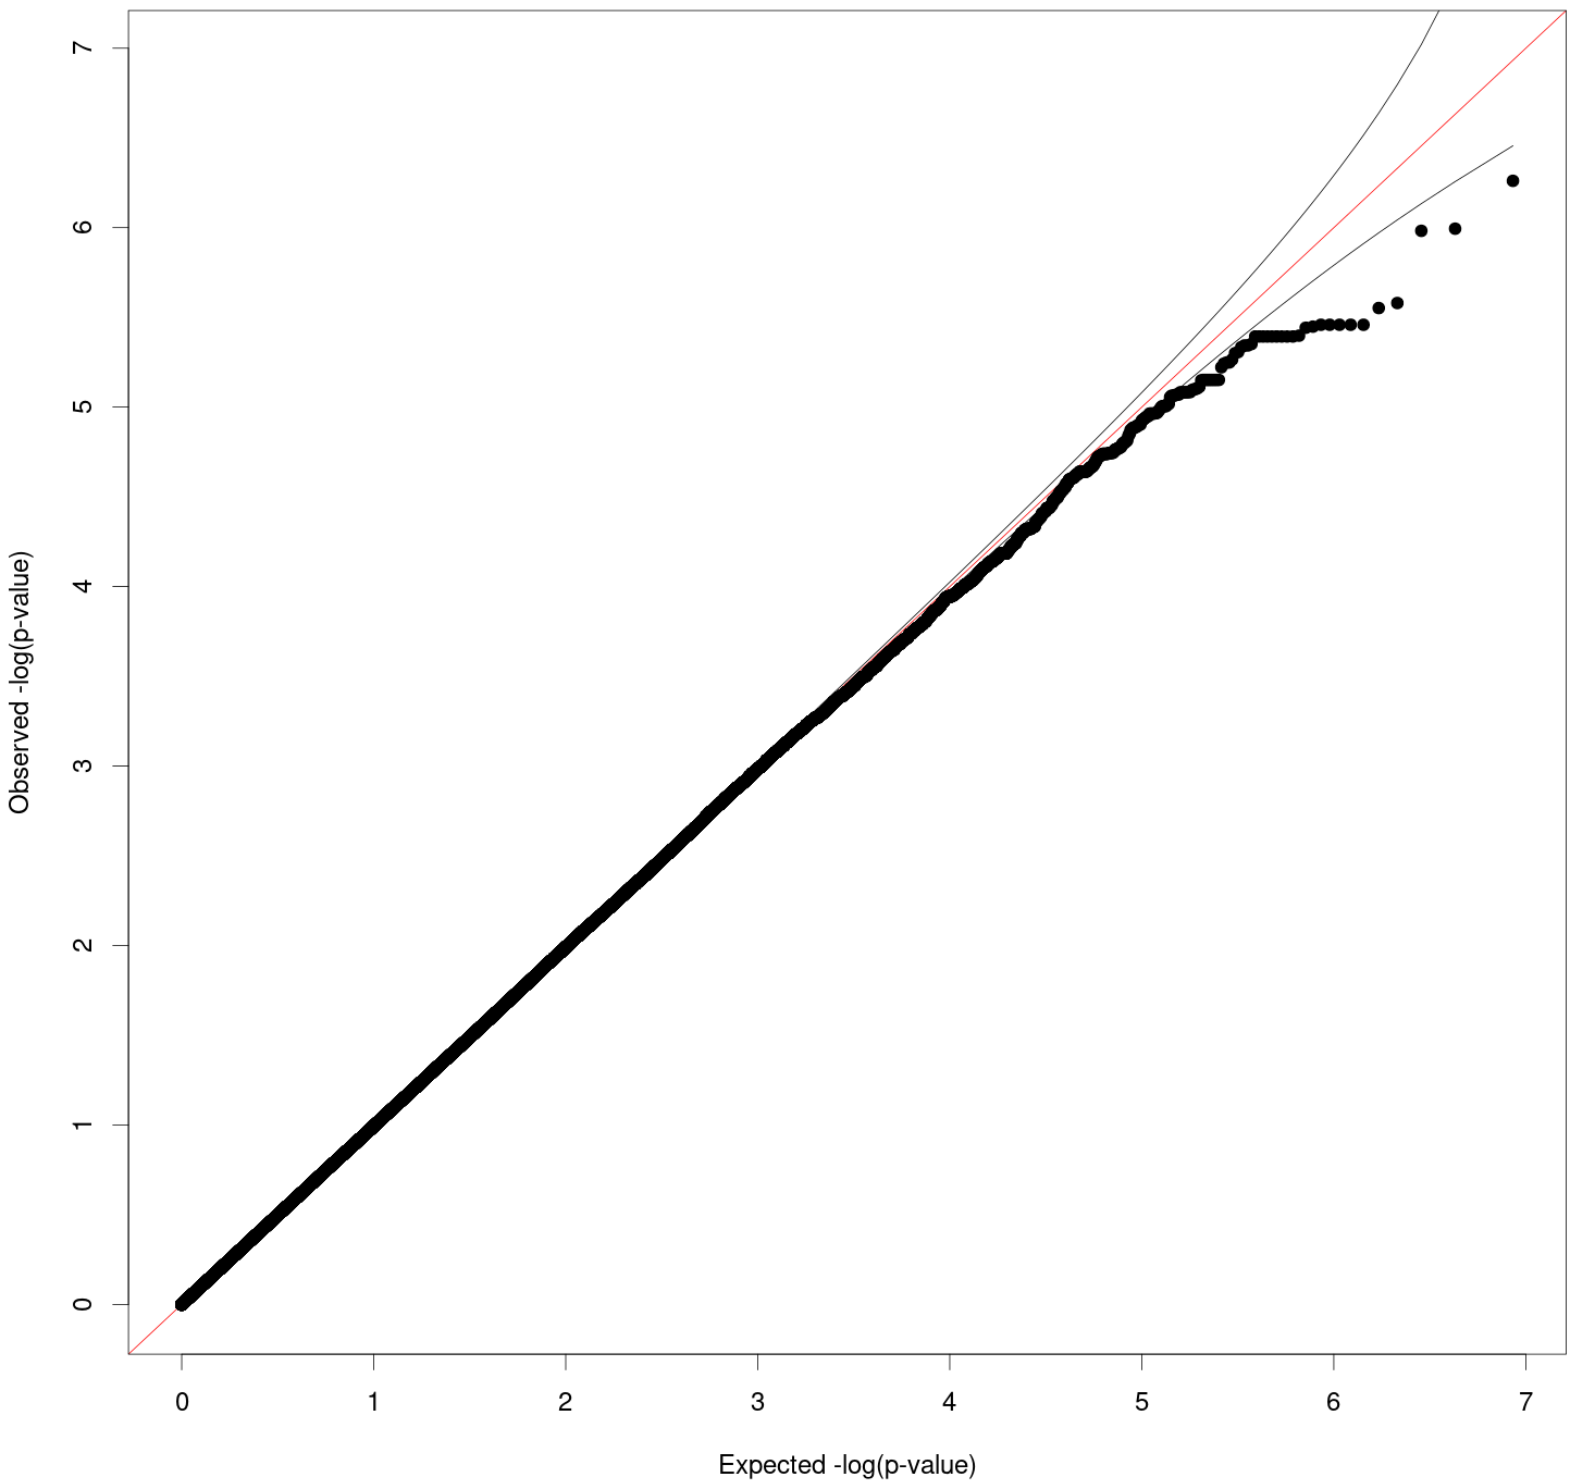

QQ plot for mz243.0627\_t22.4, uridine  
inflation factor = 1.006

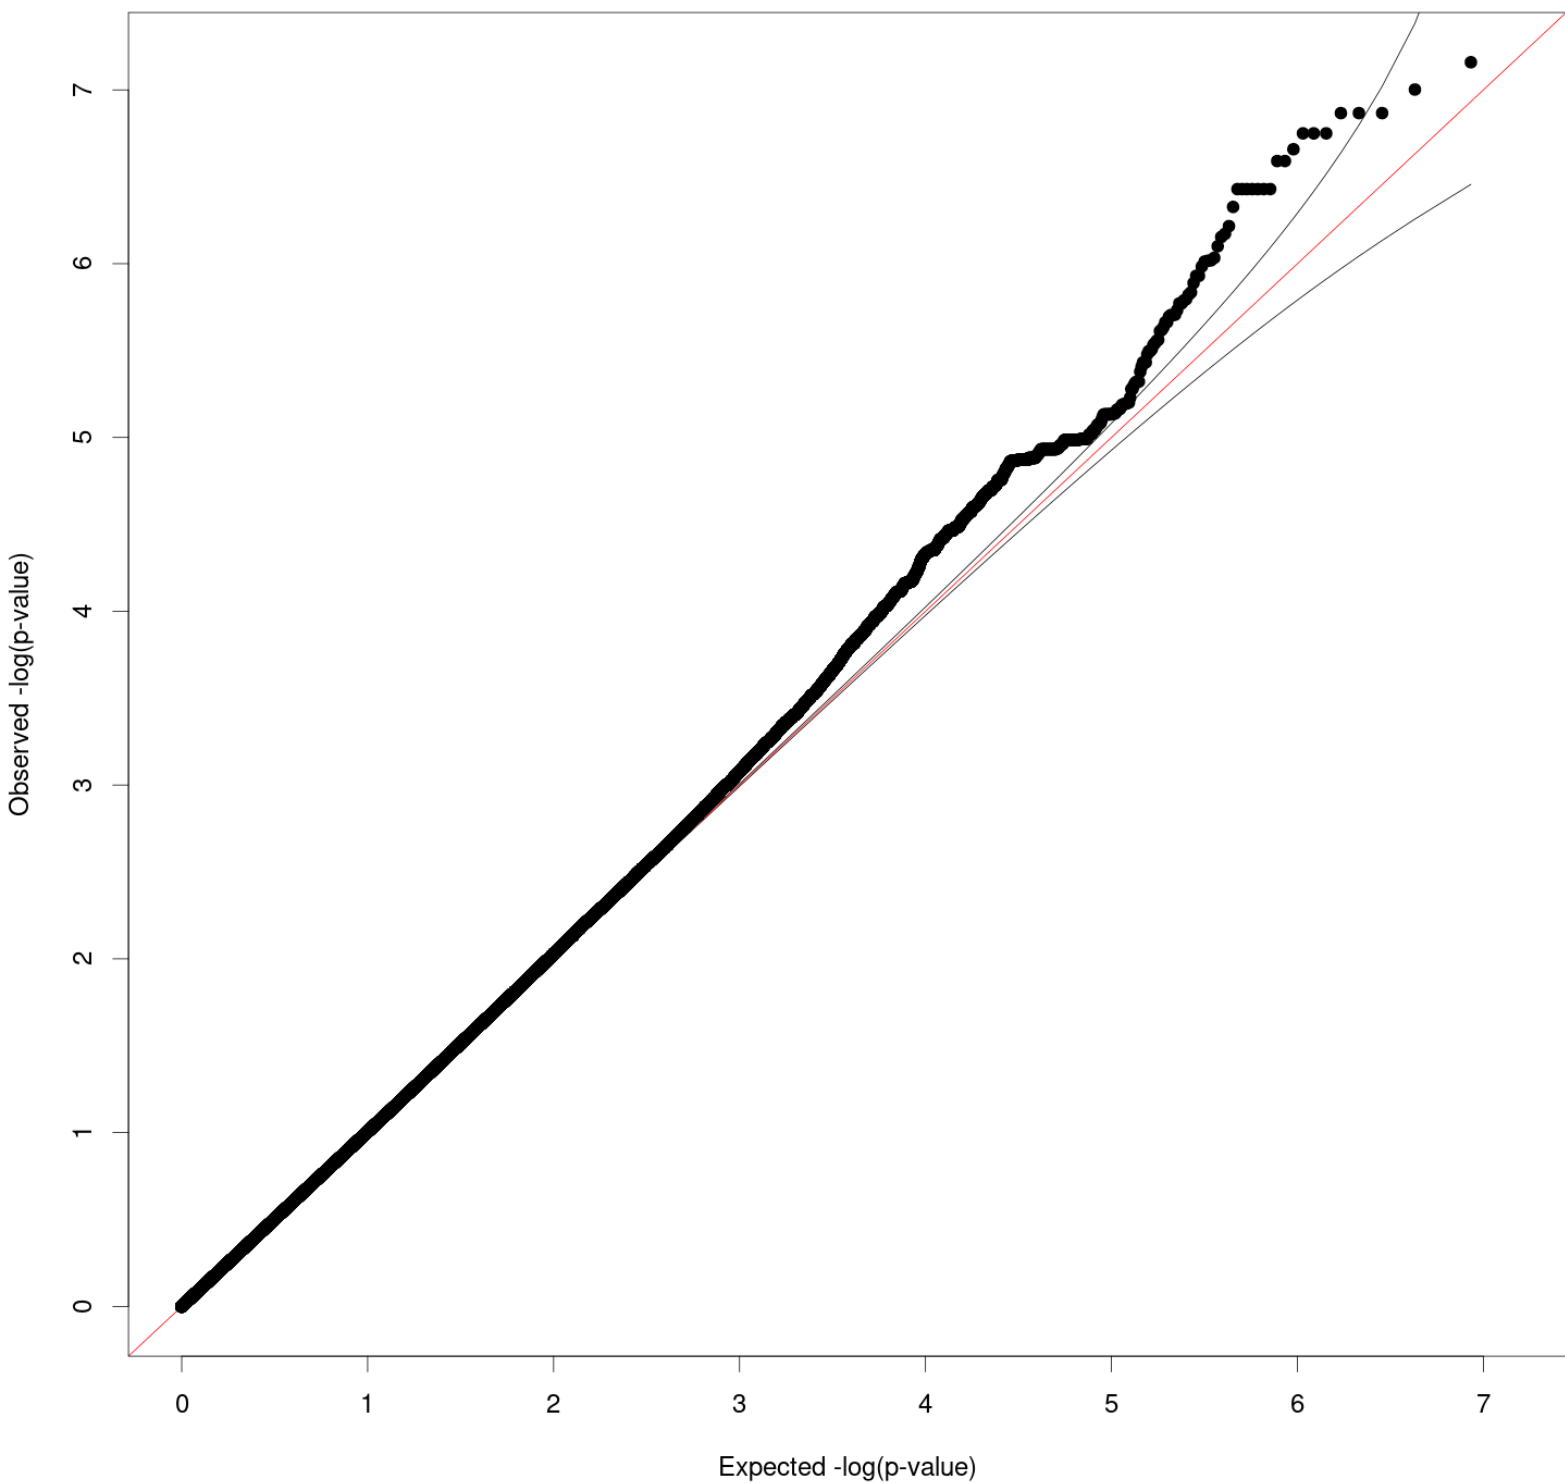

QQ plot for mz245.0769\_t45.3, uridine  
inflation factor = 0.9912

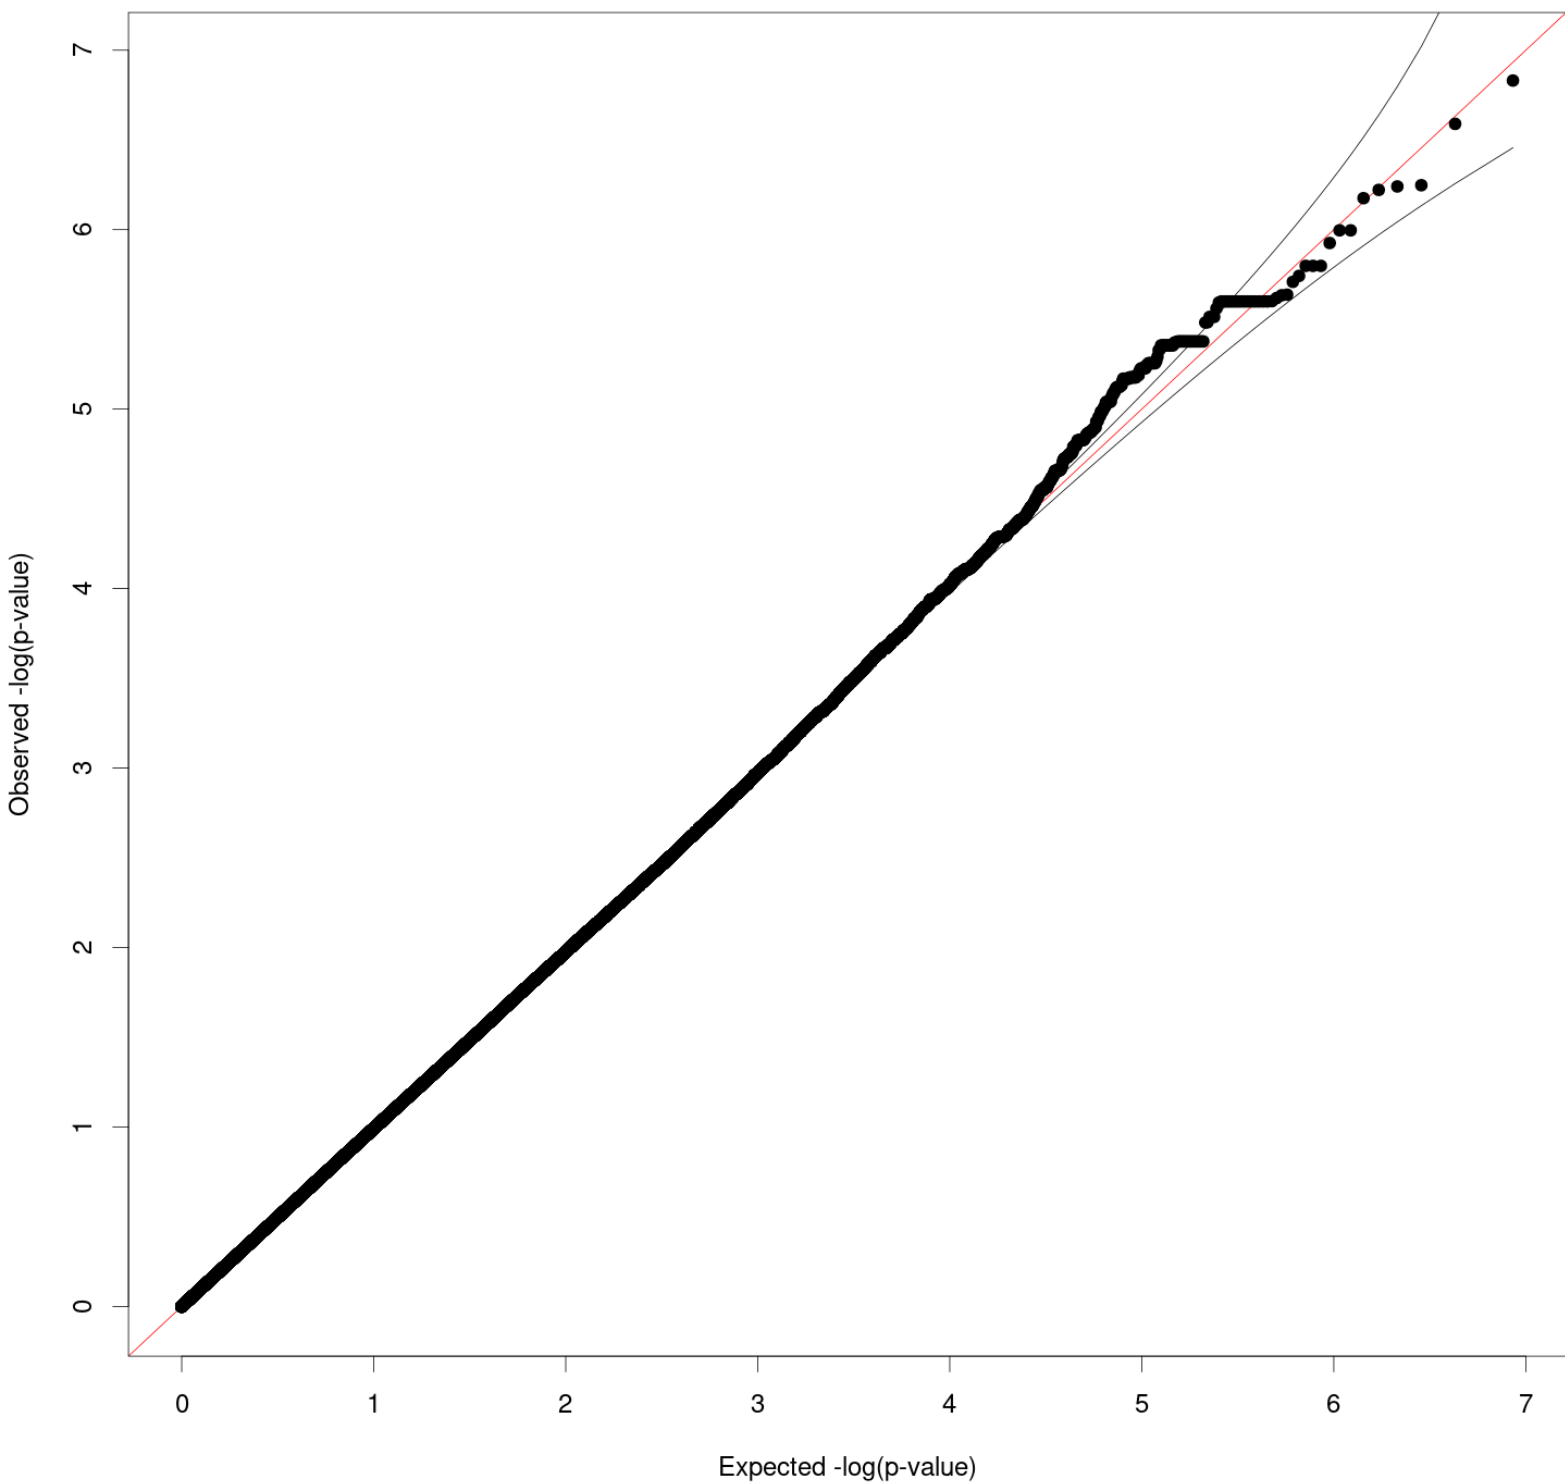

QQ plot for mz245.0935\_t49, n-acetyl-d-tryptophan  
inflation factor = 1.011

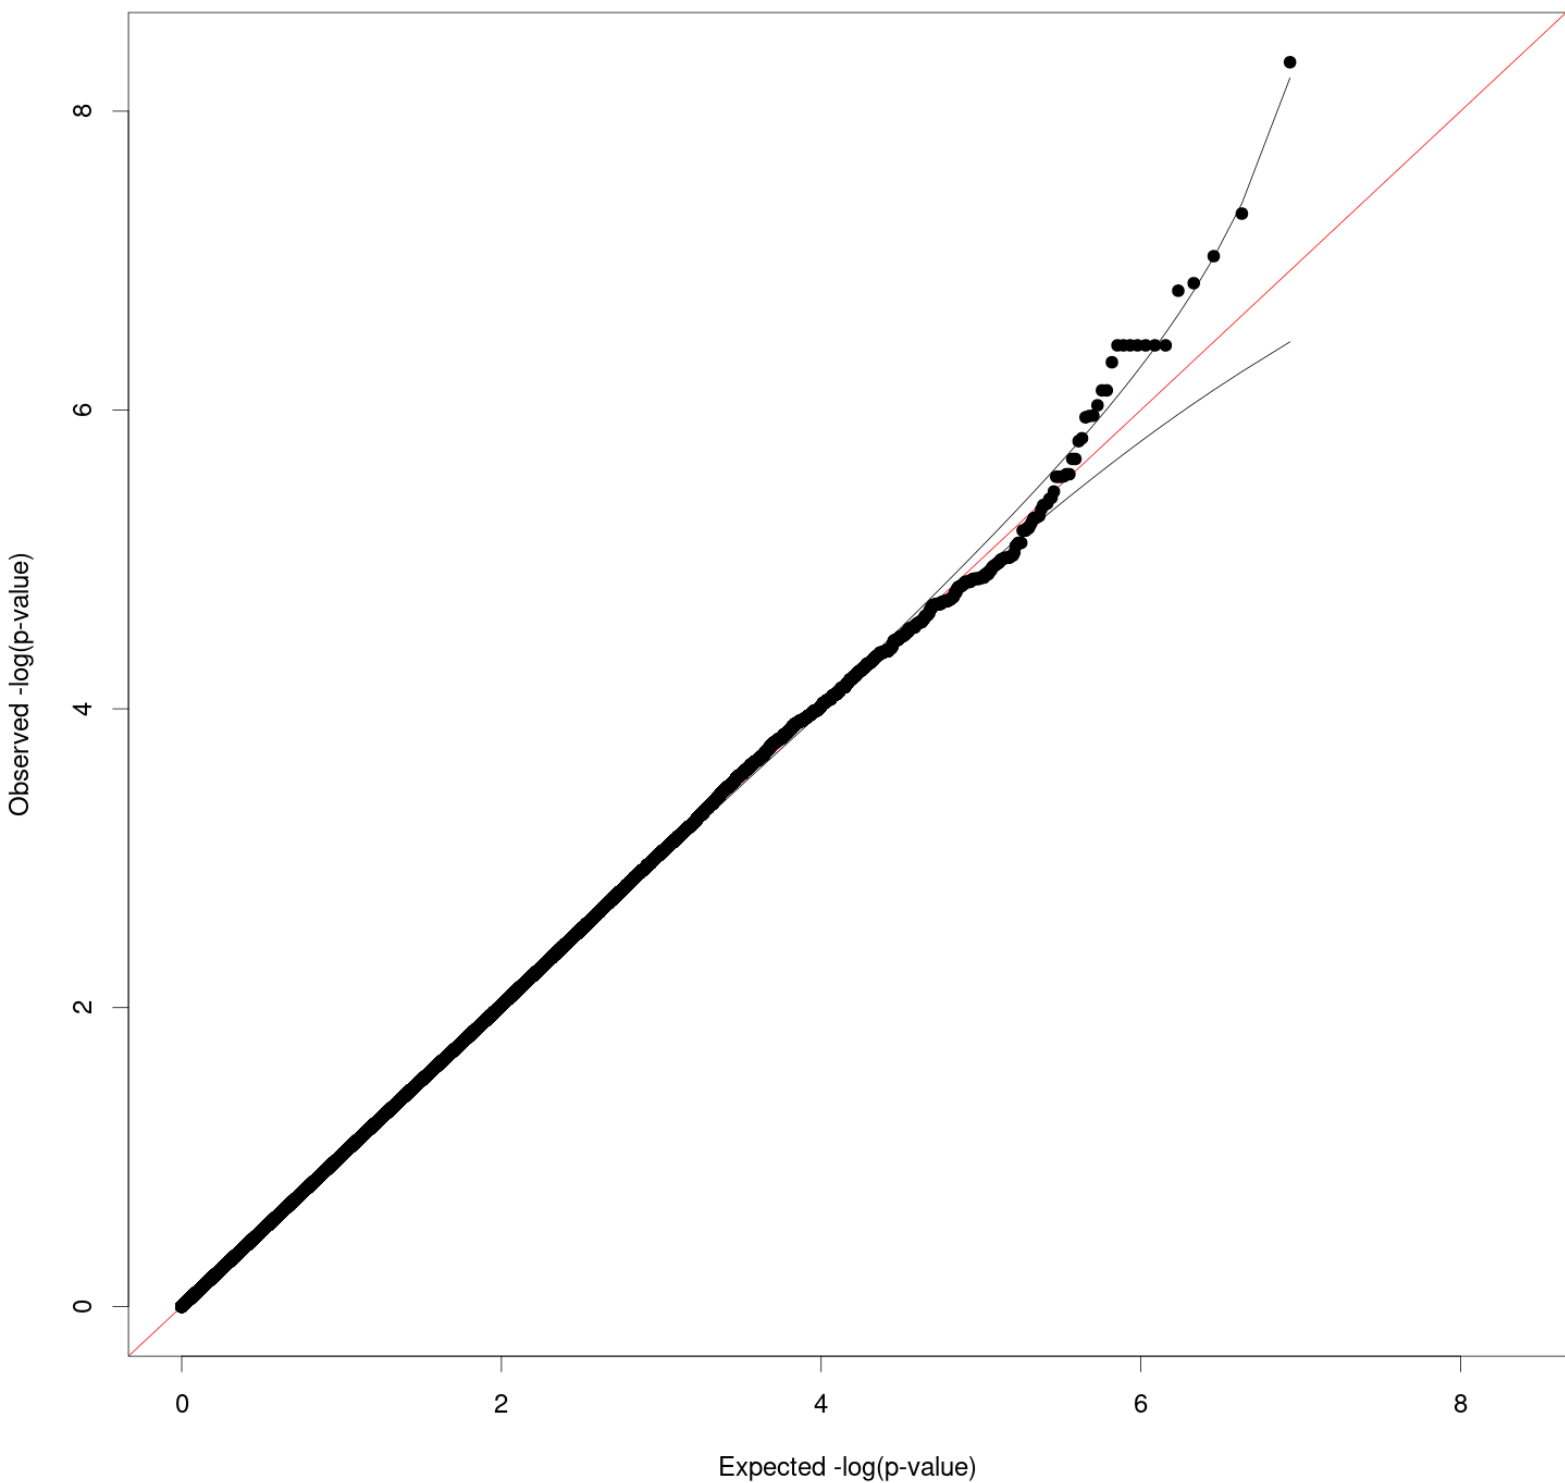

QQ plot for mz245.0971\_t55, biotin  
inflation factor = 1.008

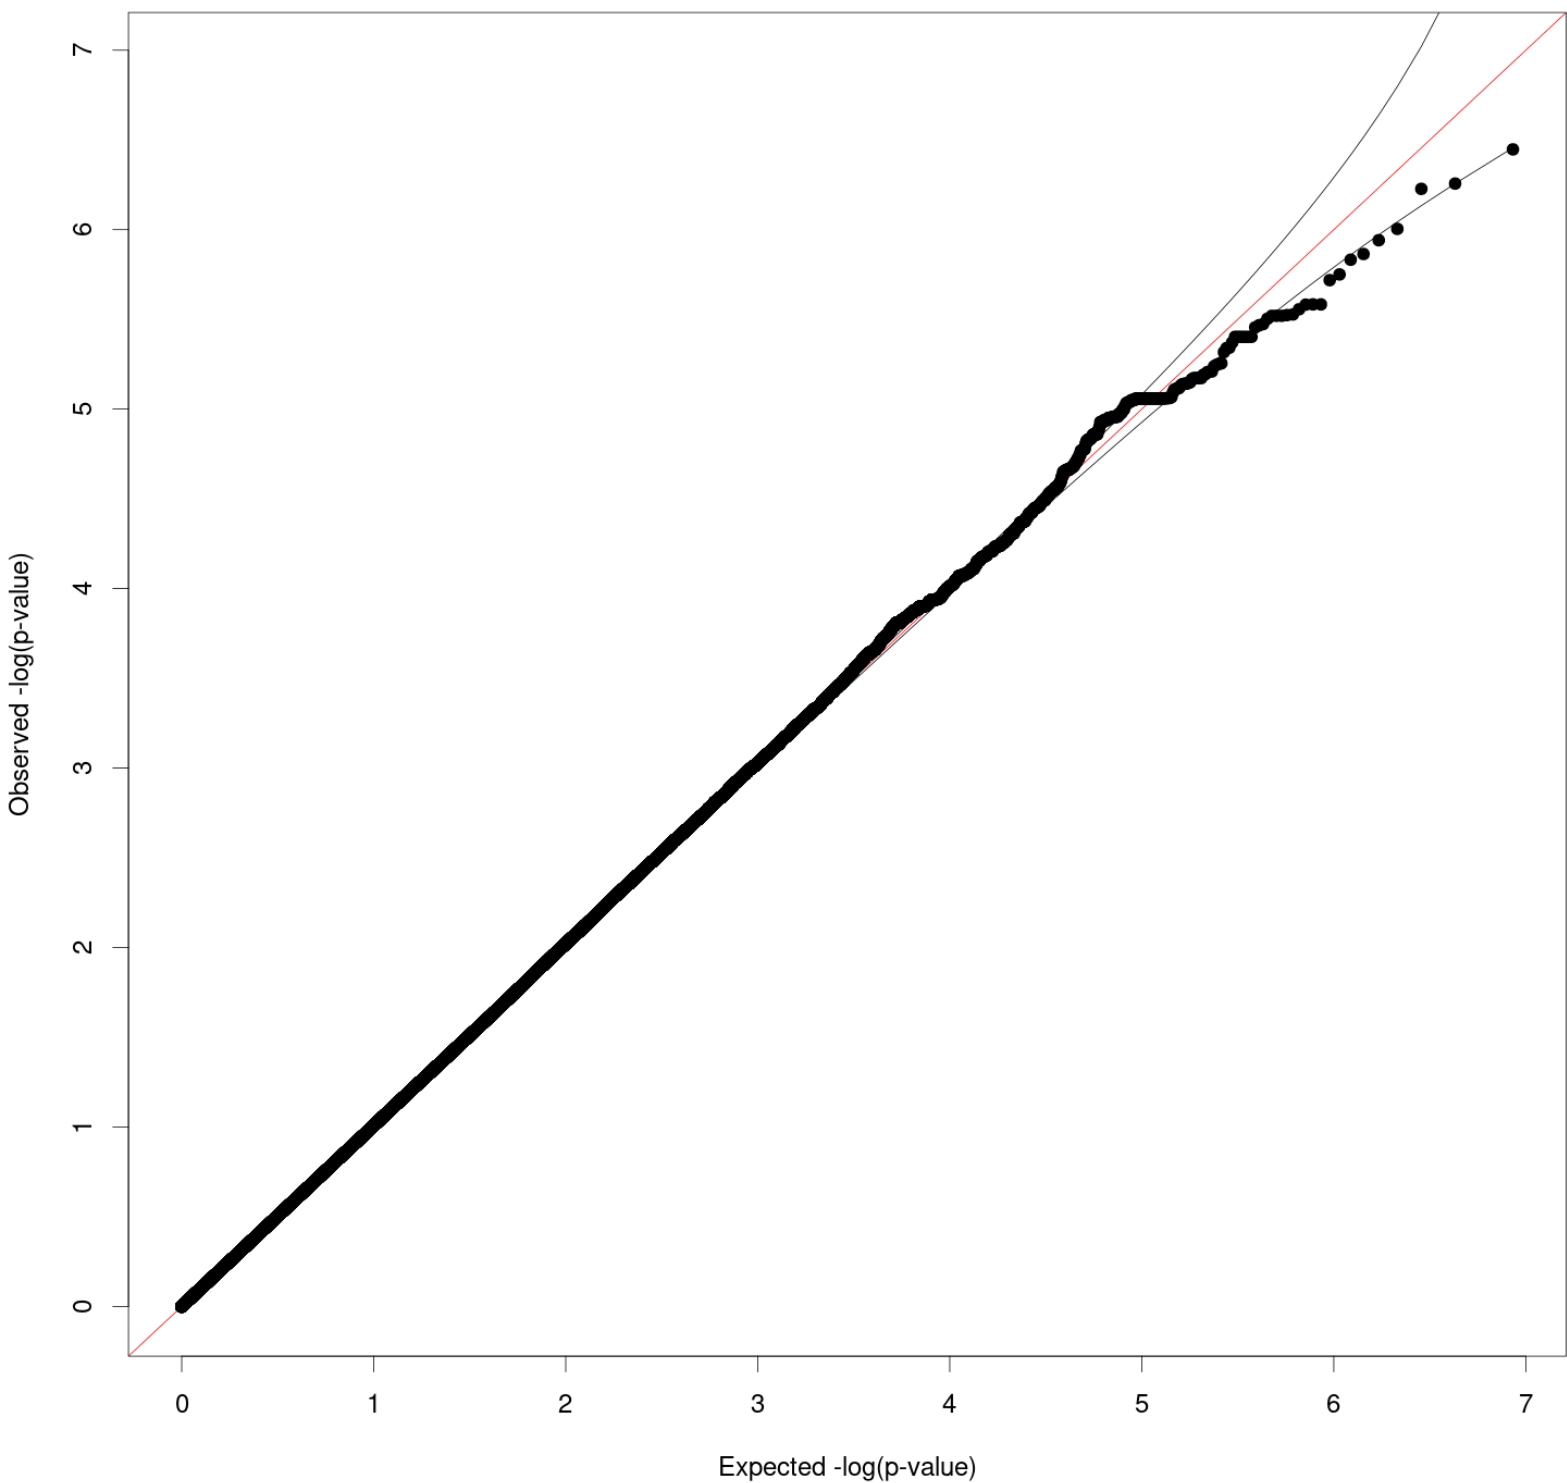



QQ plot for mz247.1076\_t34.1, n-acetyl-d-tryptophan  
inflation factor = 0.9978

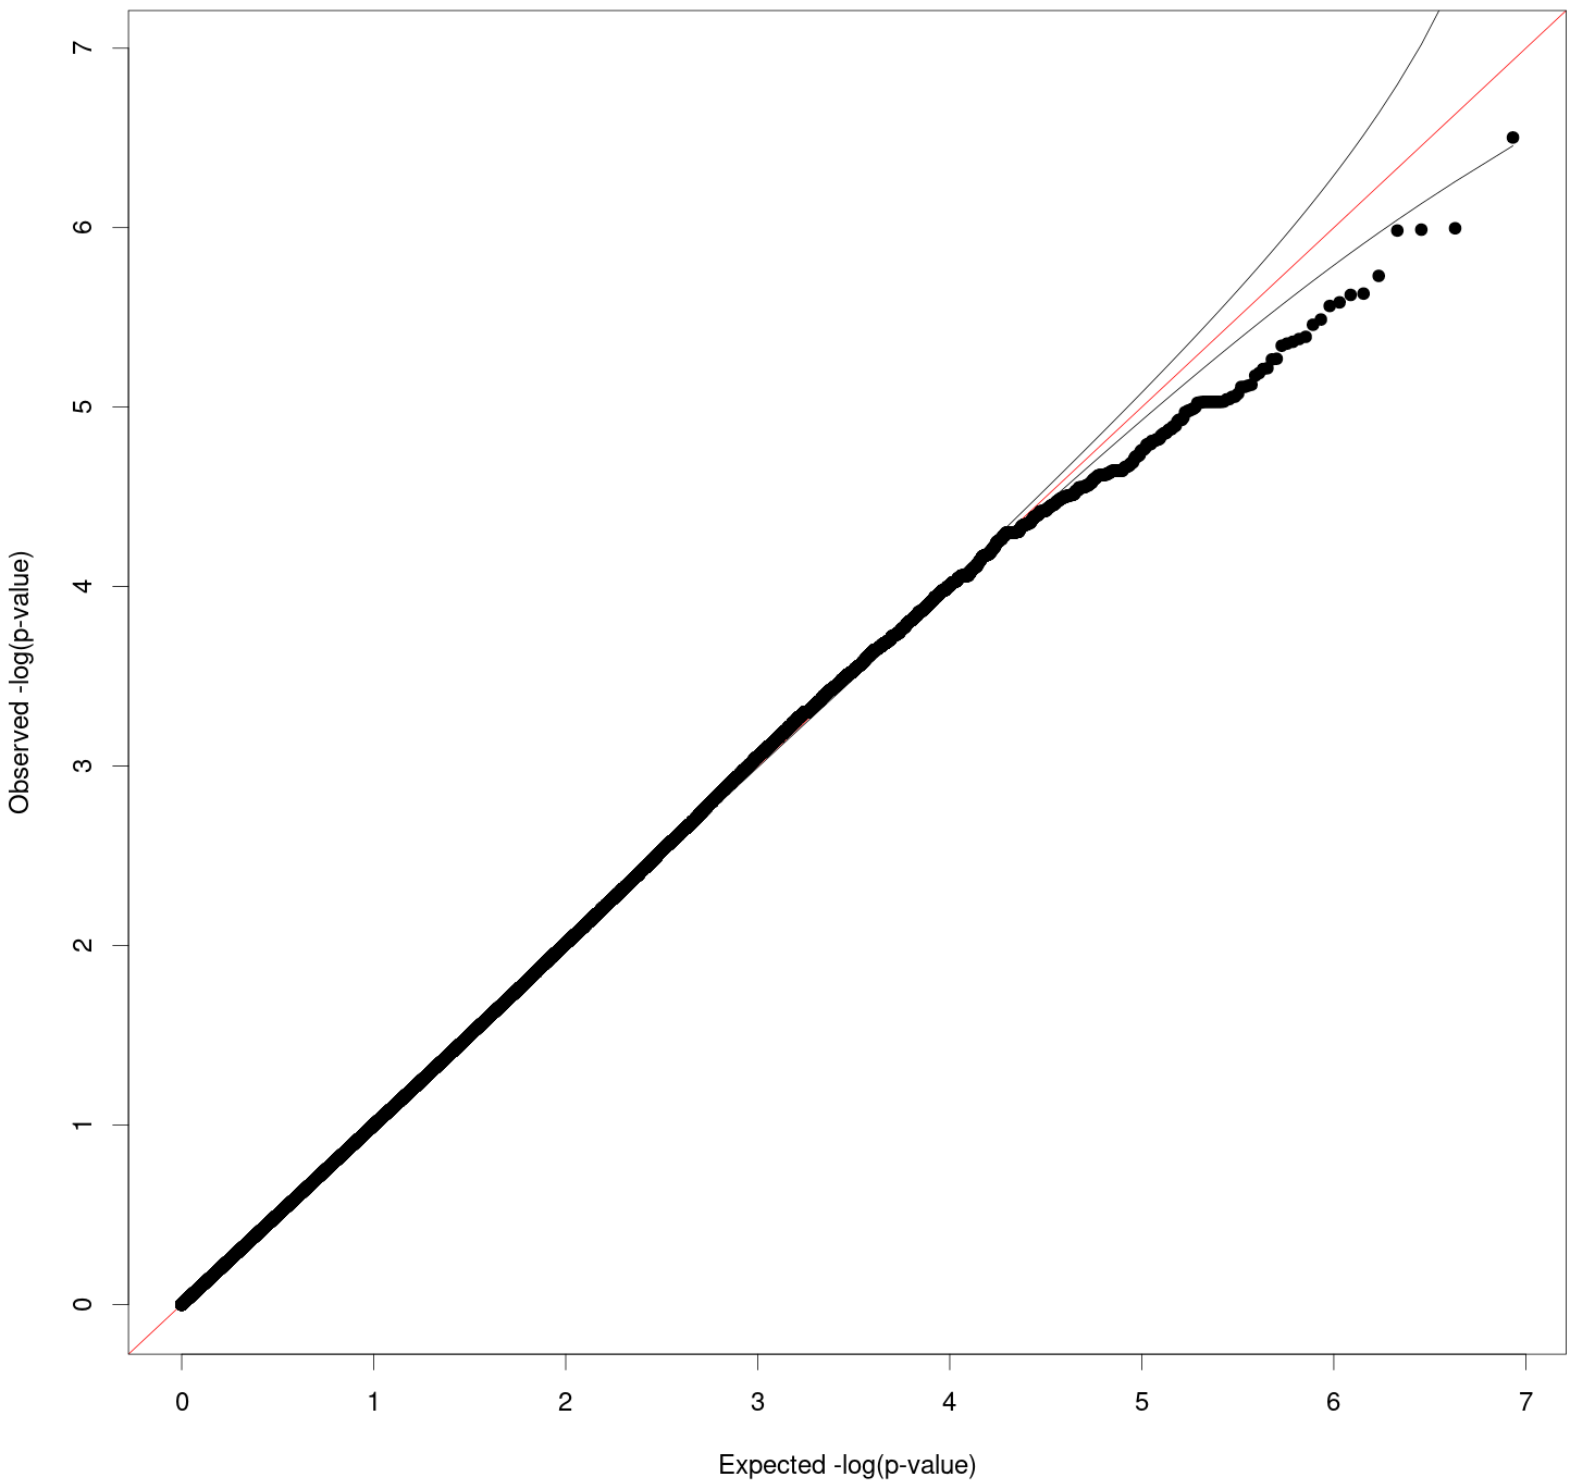

QQ plot for mz253.2177\_t230.4, palmitoleic acid  
inflation factor = 1.005

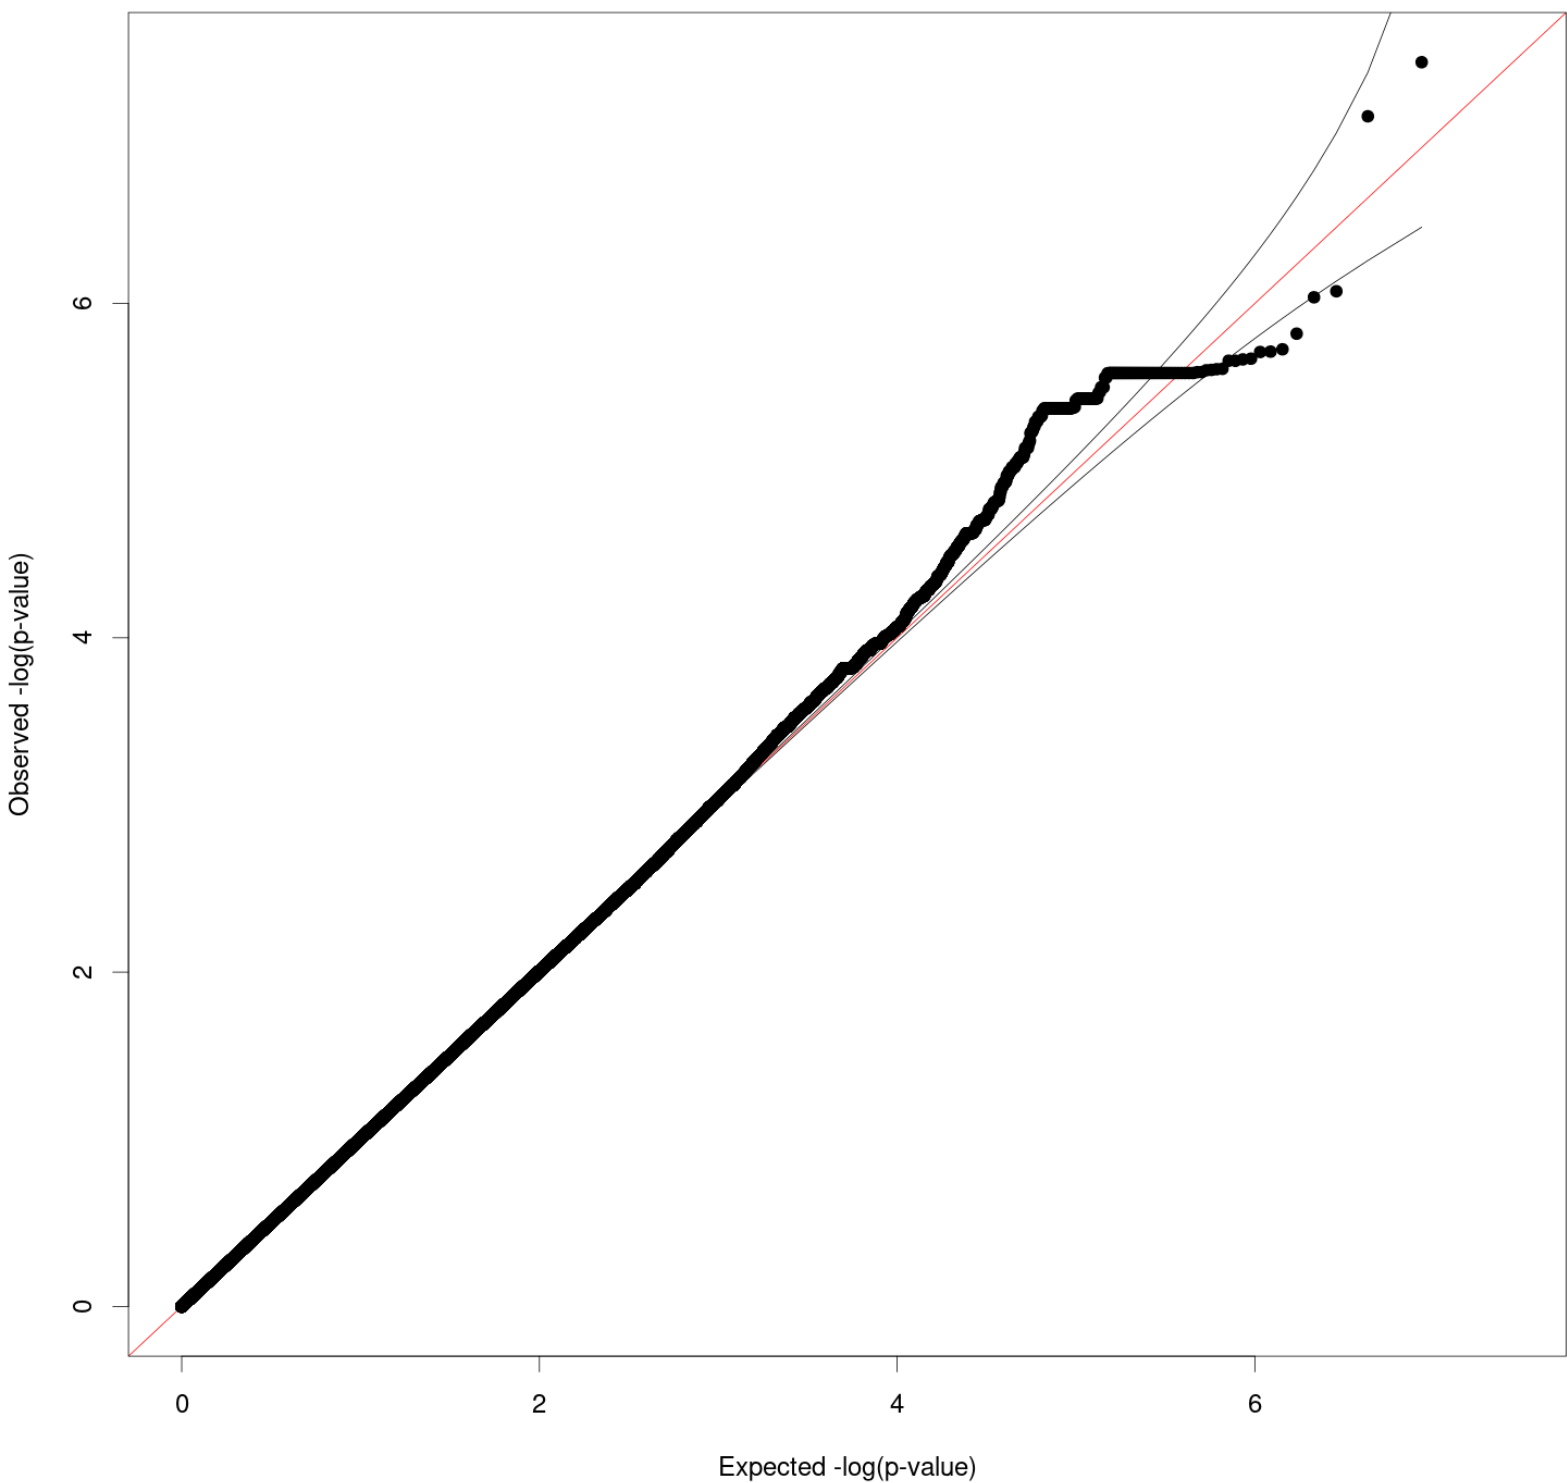

QQ plot for mz255.2318\_t21.7, palmitoleic acid  
inflation factor = 1.001

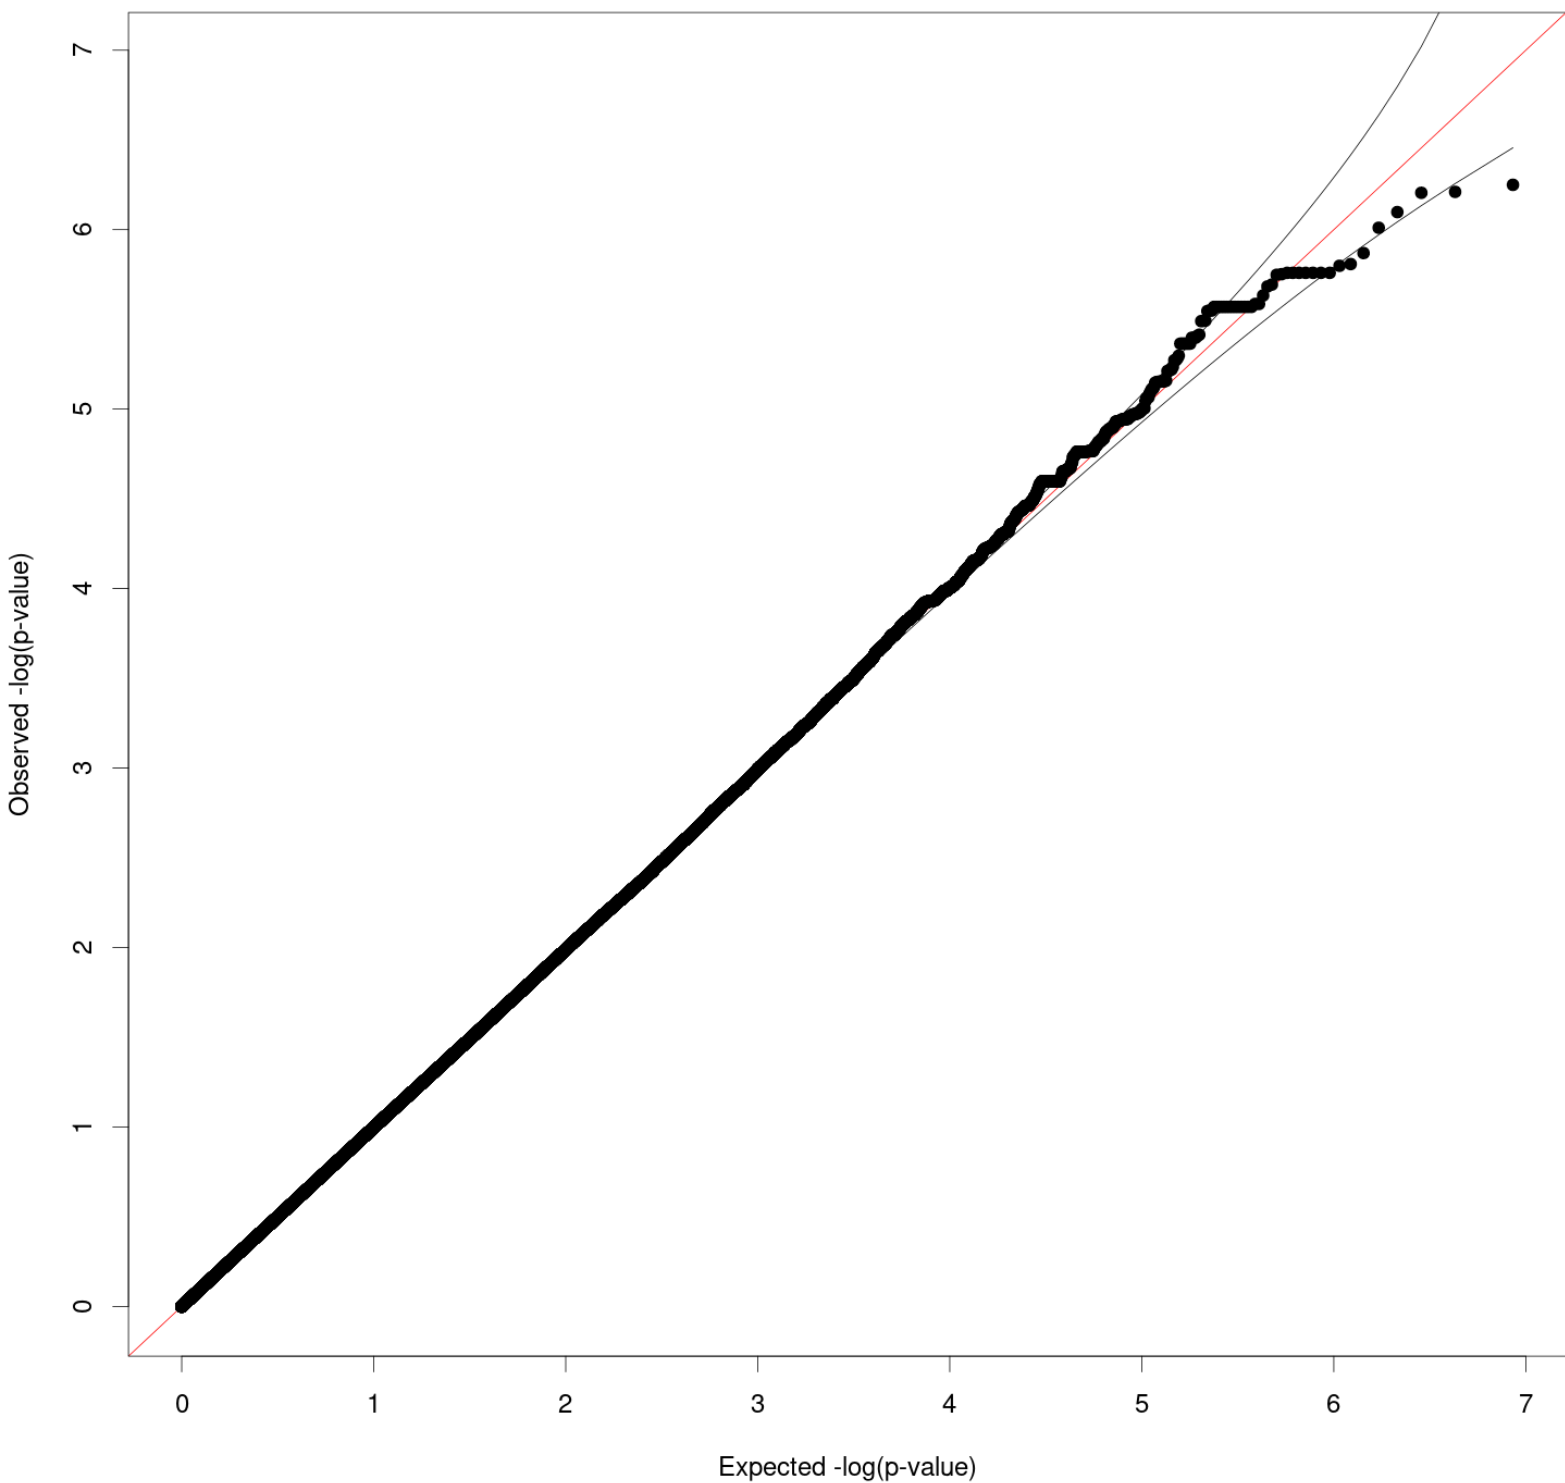

QQ plot for mz258.1102\_t114.4, sn-glycero-3-phosphocholine  
inflation factor = 0.9888

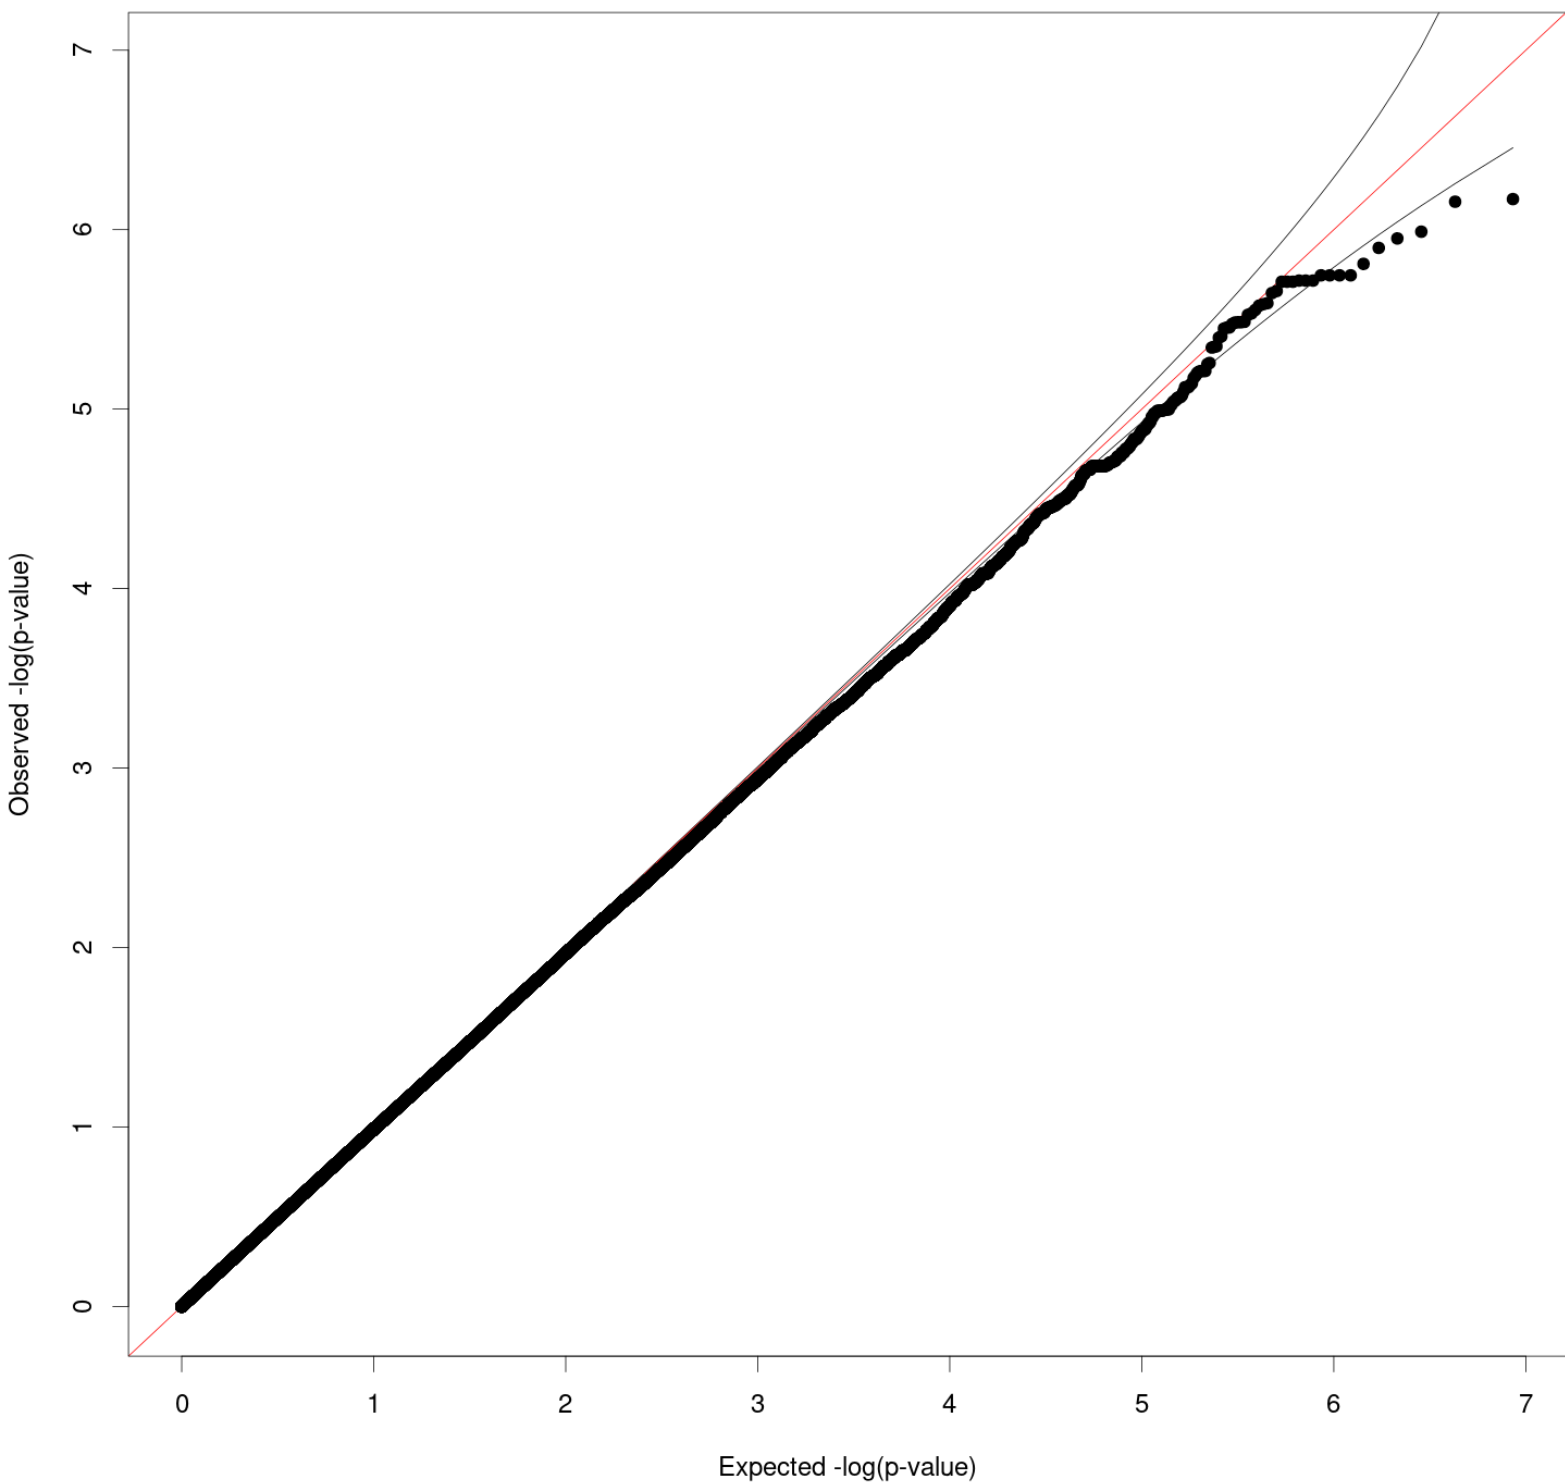

QQ plot for mz266.0893\_t18.4, adenosine  
inflation factor = 1.008

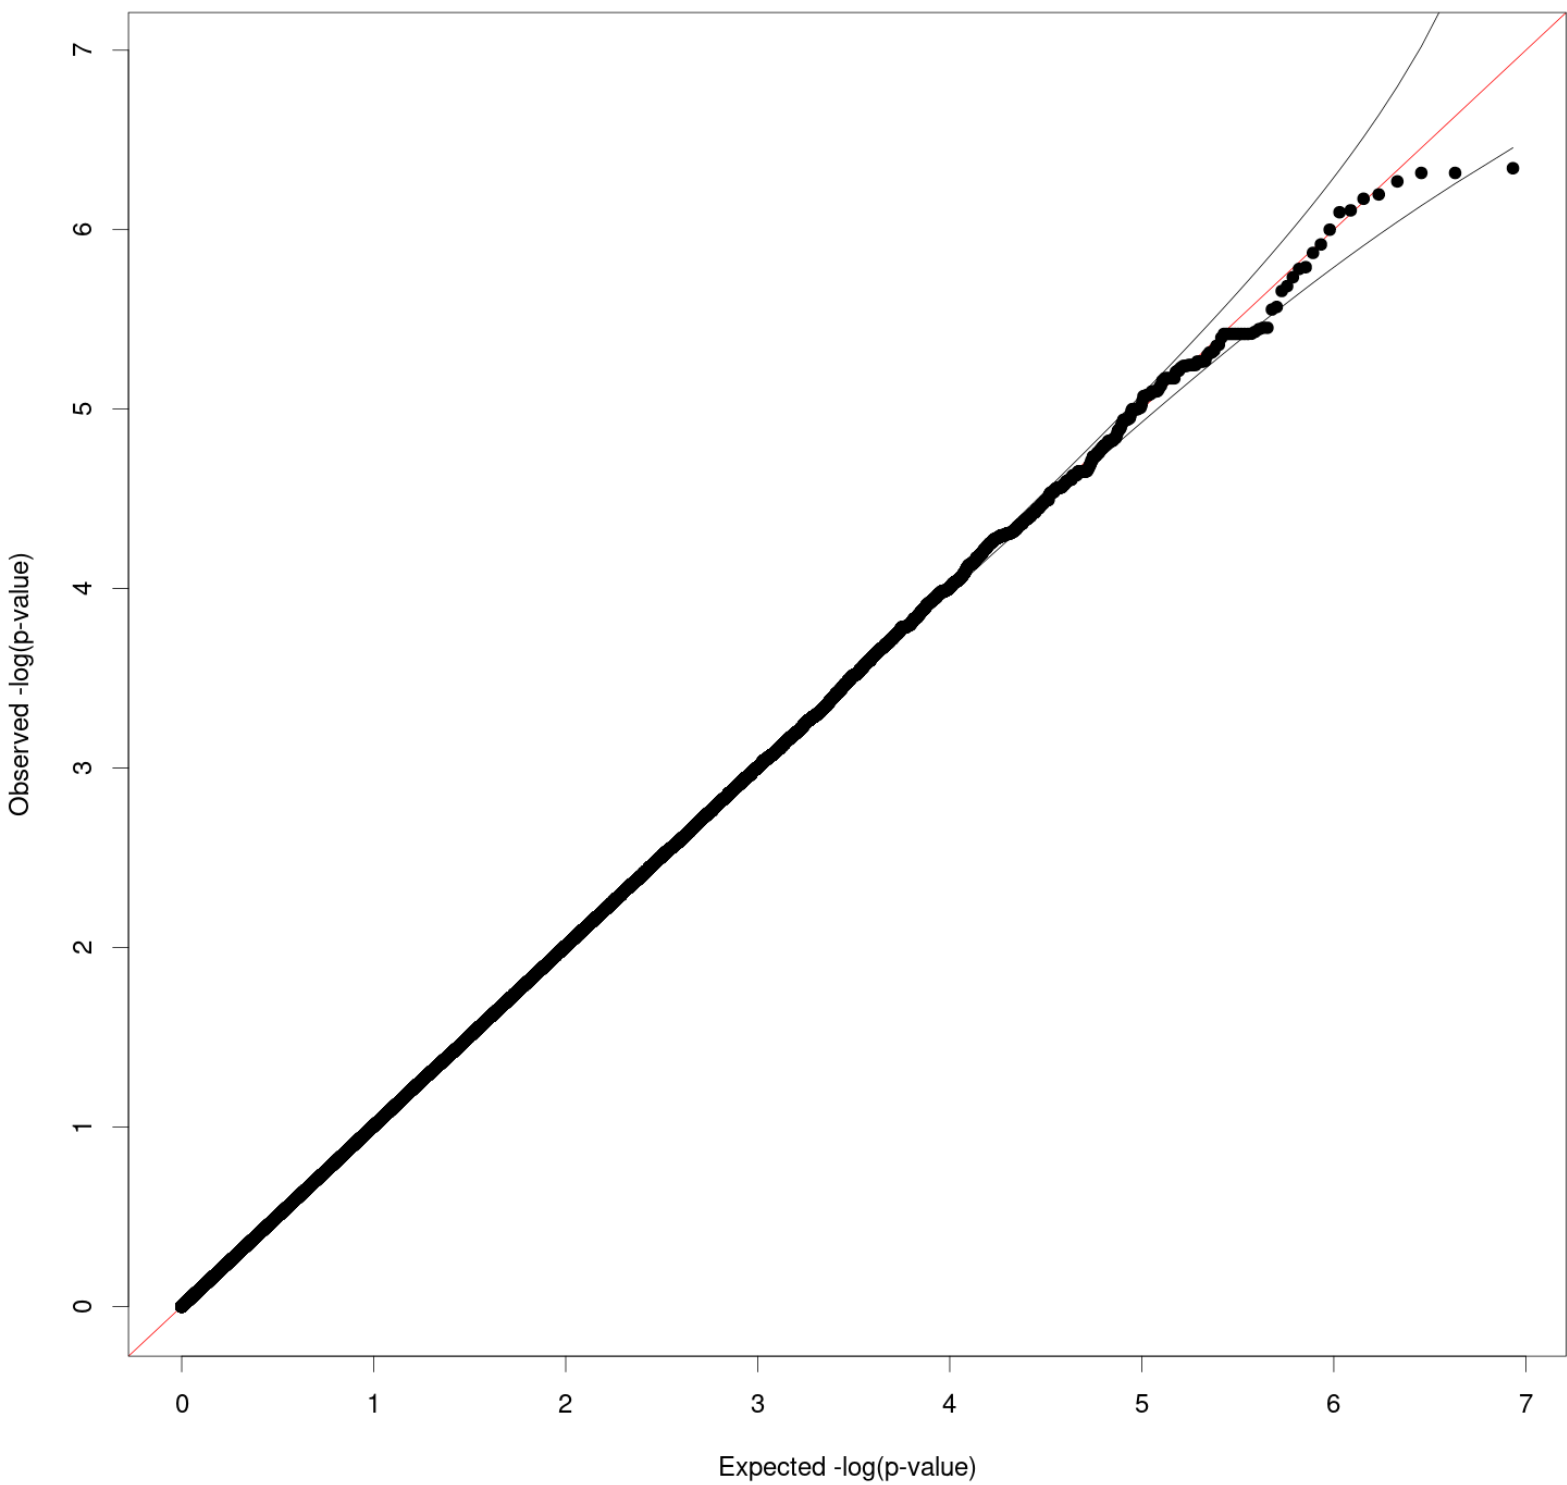

QQ plot for mz266.1215\_t33.8, thiamine  
inflation factor = 1.003

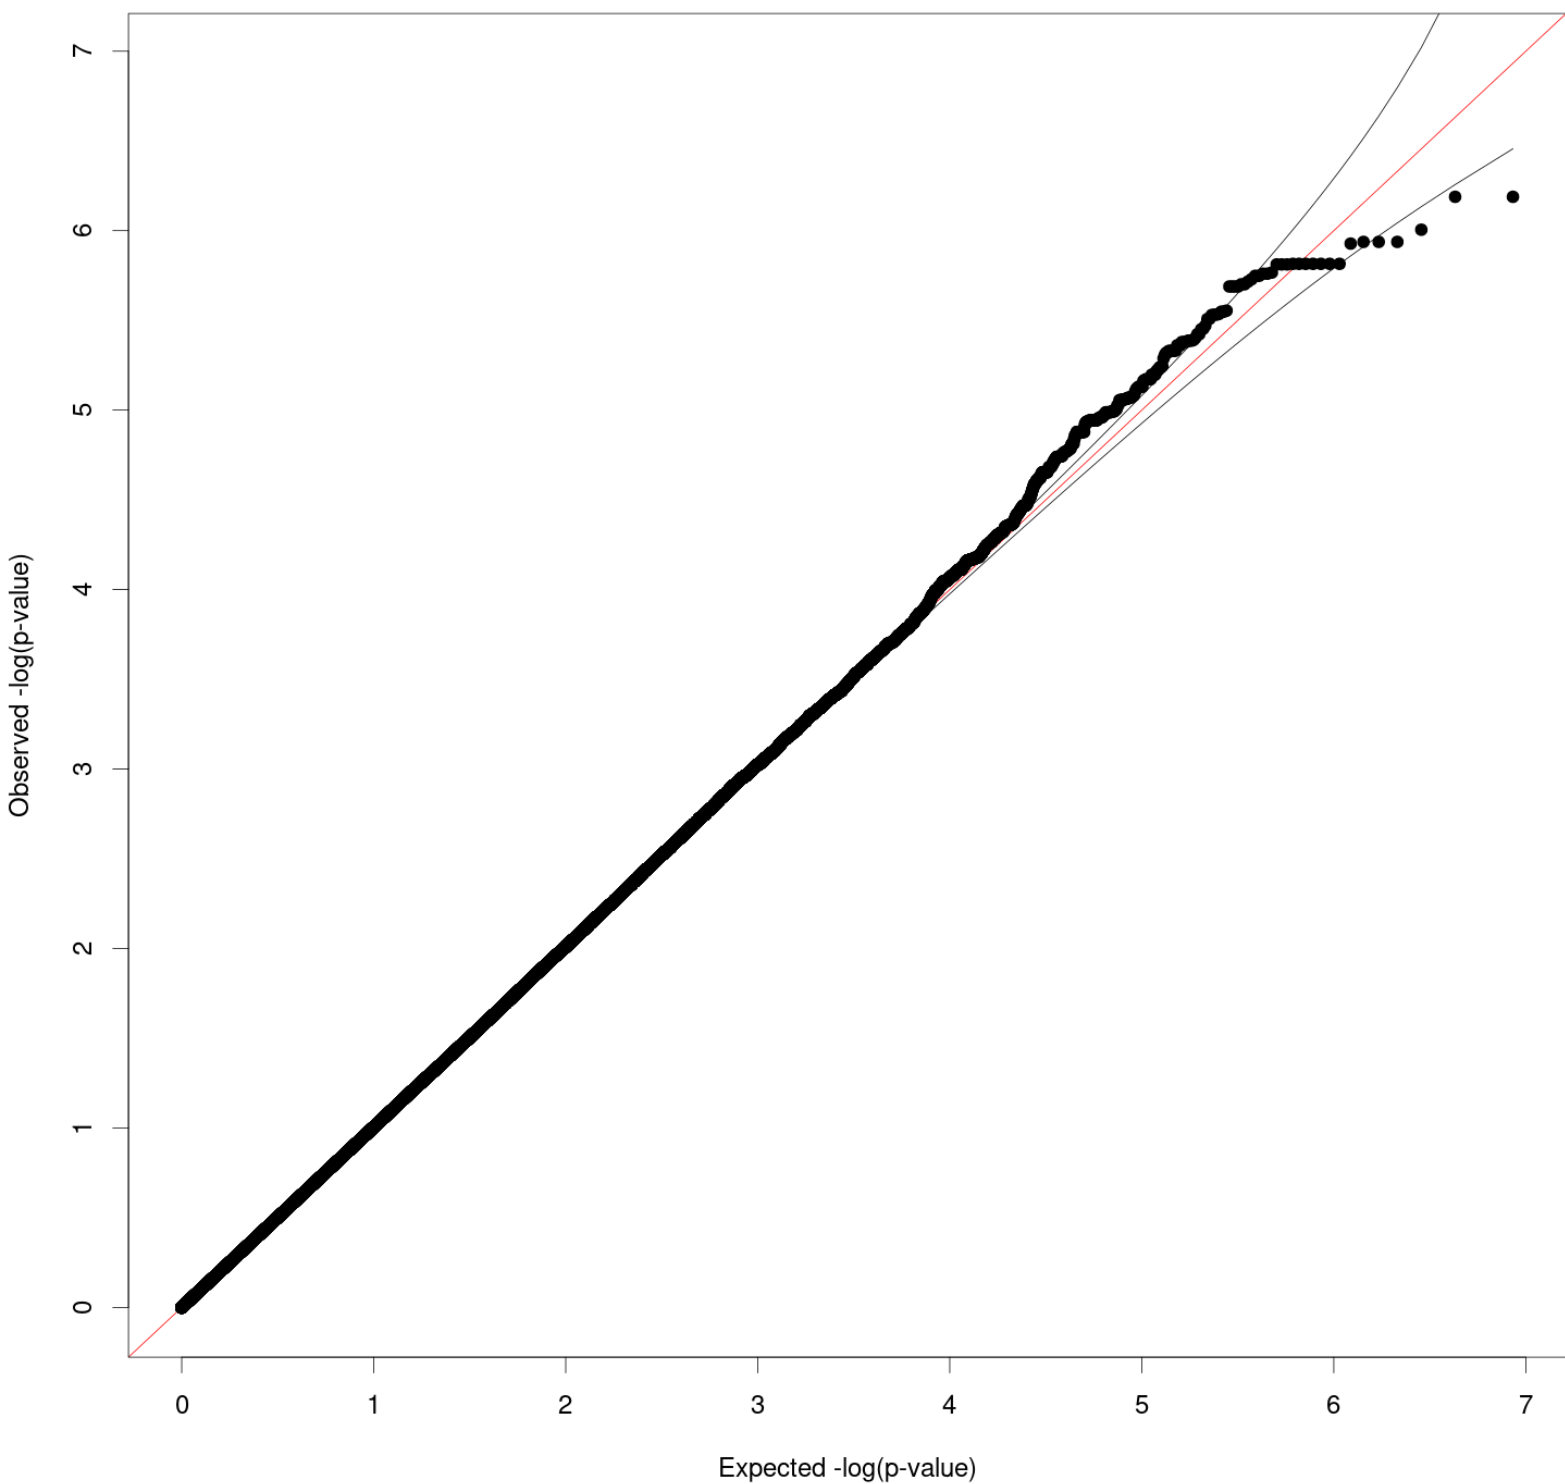

QQ plot for mz269.0881\_t43.1, inosine  
inflation factor = 0.9958

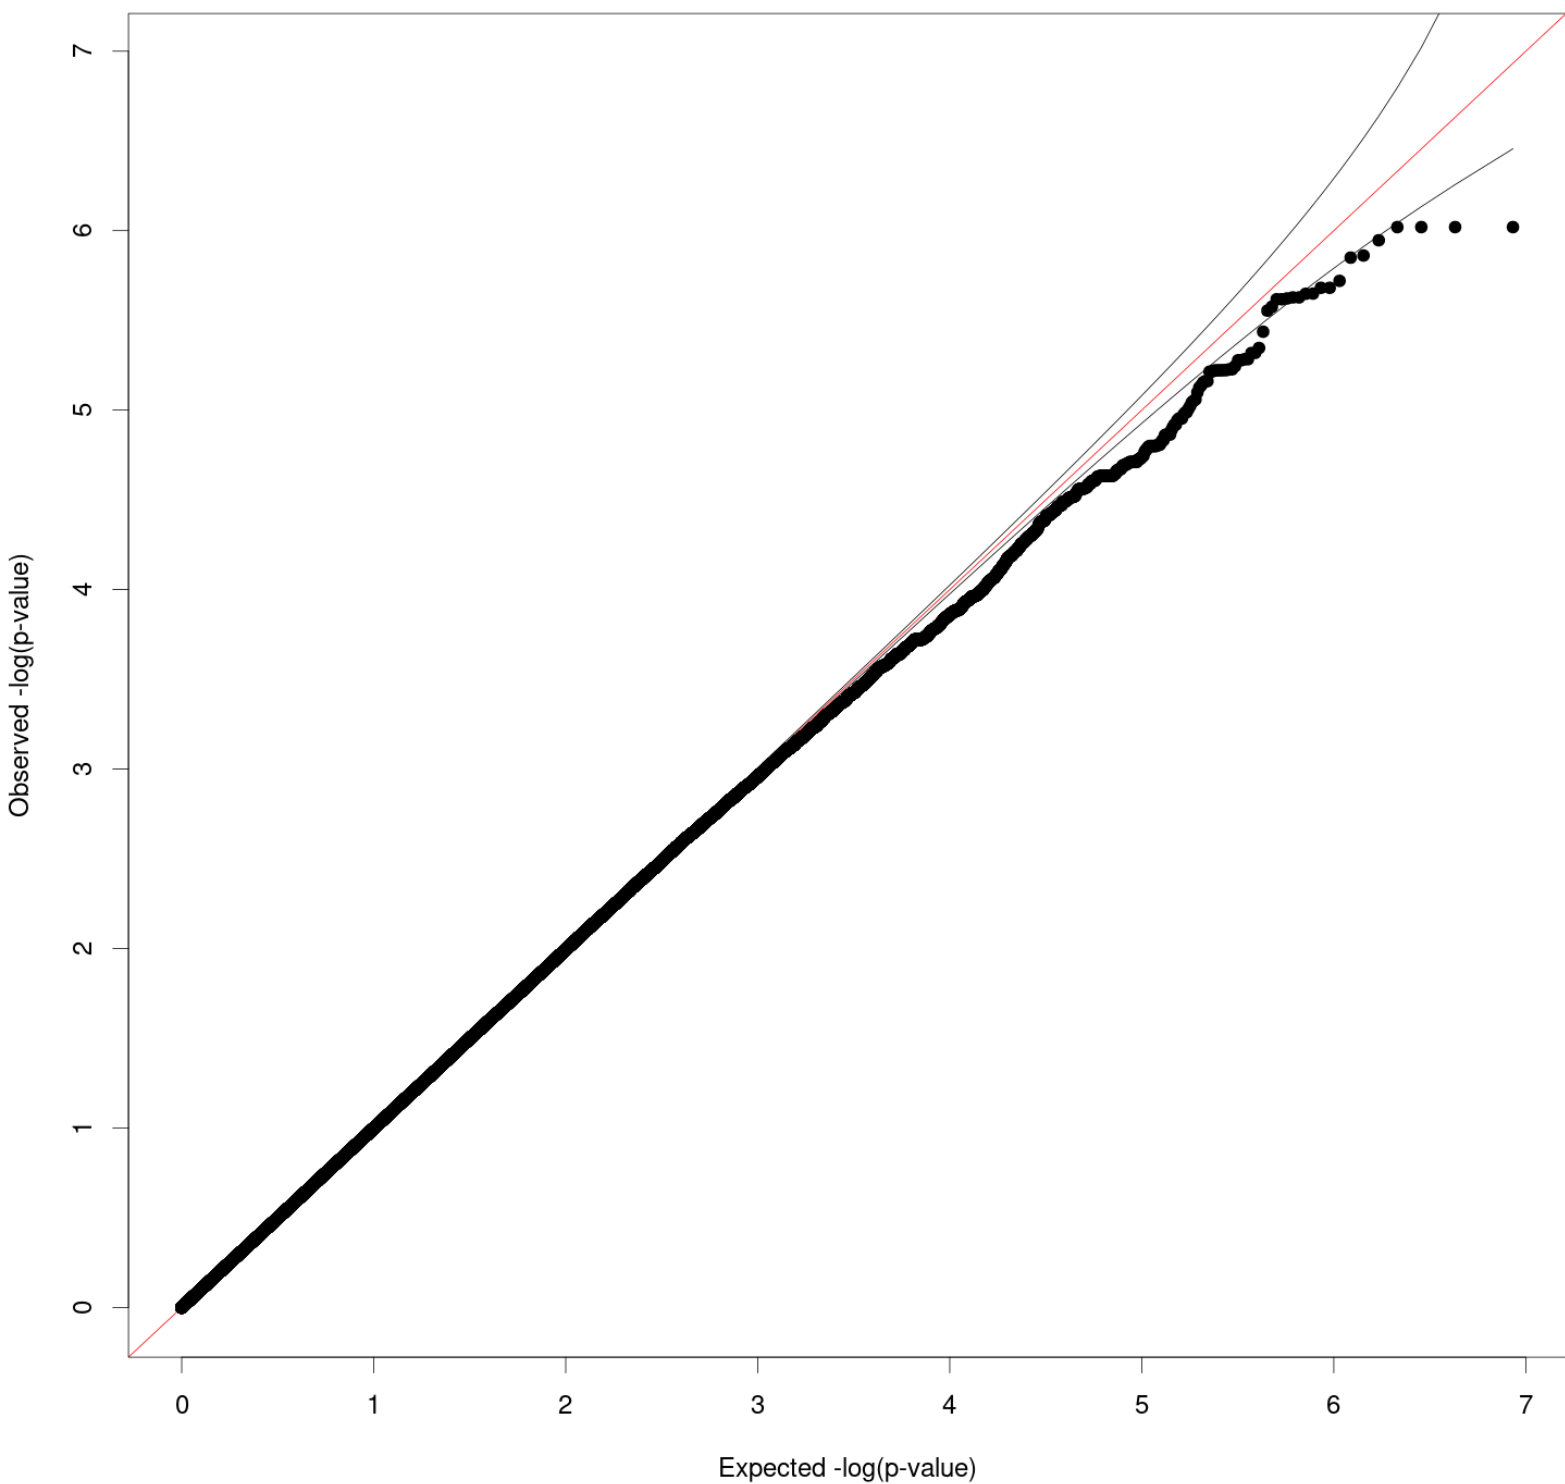

QQ plot for mz279.2319\_t23.7, gamma-linolenic acid  
inflation factor = 0.9958

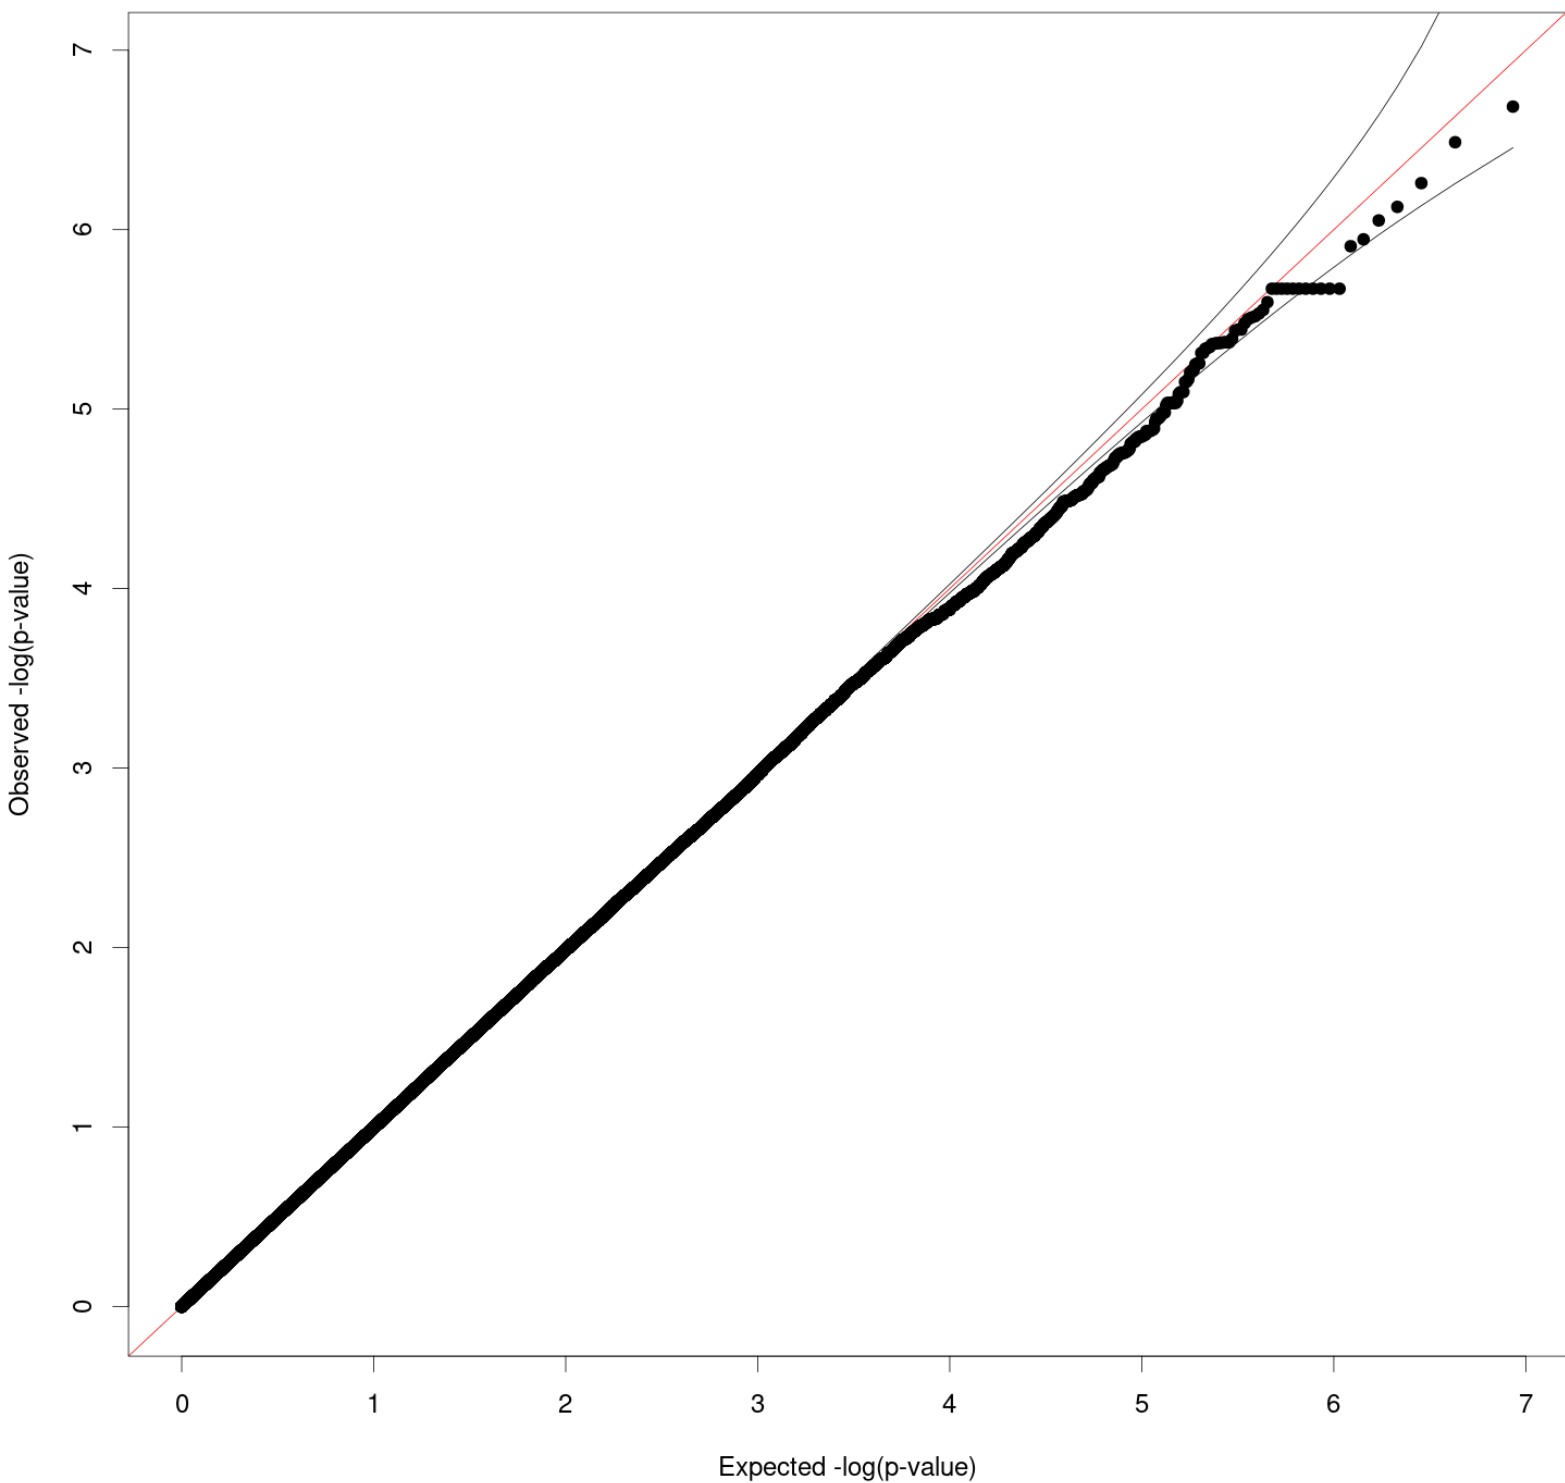



QQ plot for mz279.2335\_t237.1, linoleate  
inflation factor = 1.005

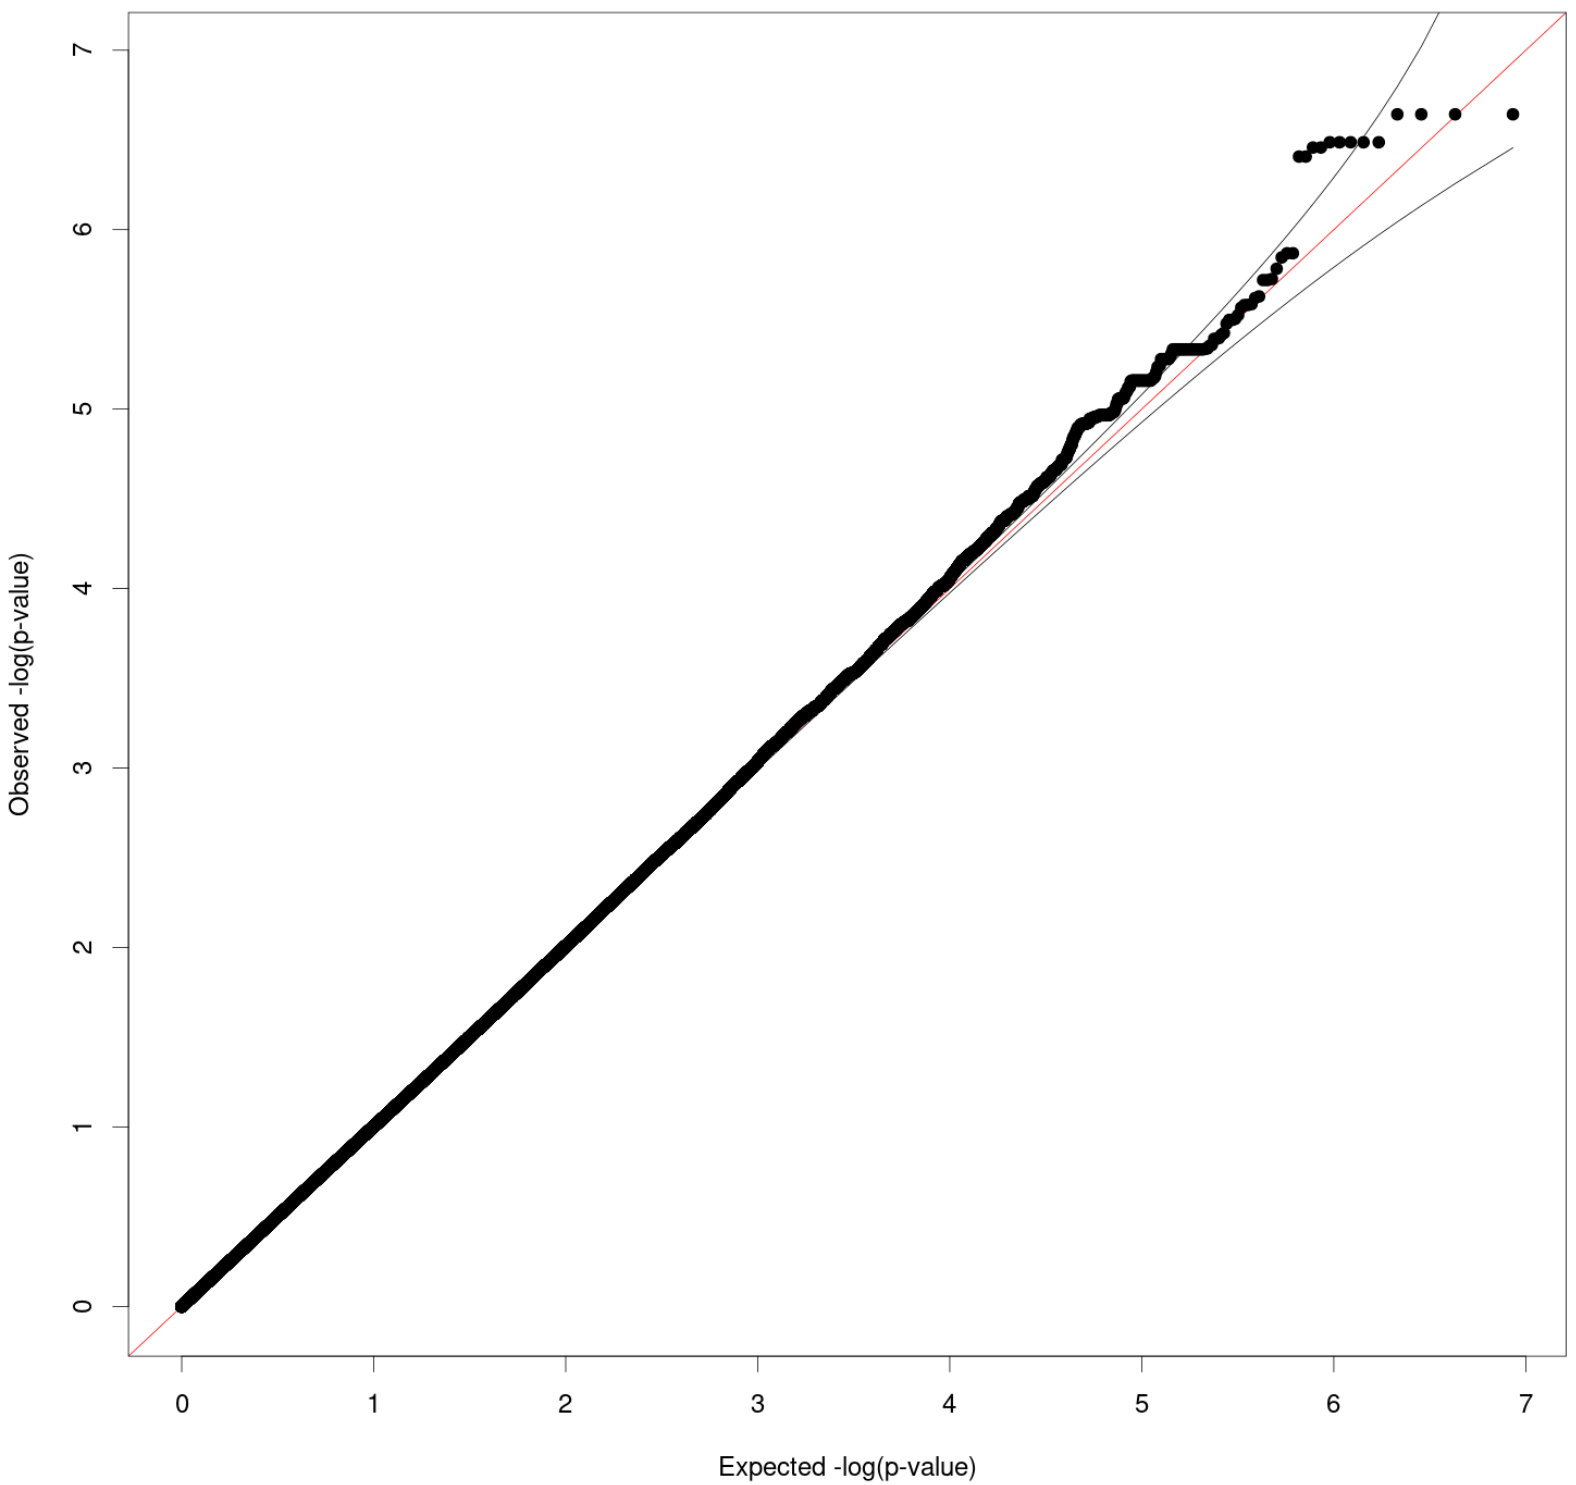

QQ plot for mz281.2476\_t28.9, linoleate  
inflation factor = 0.9918

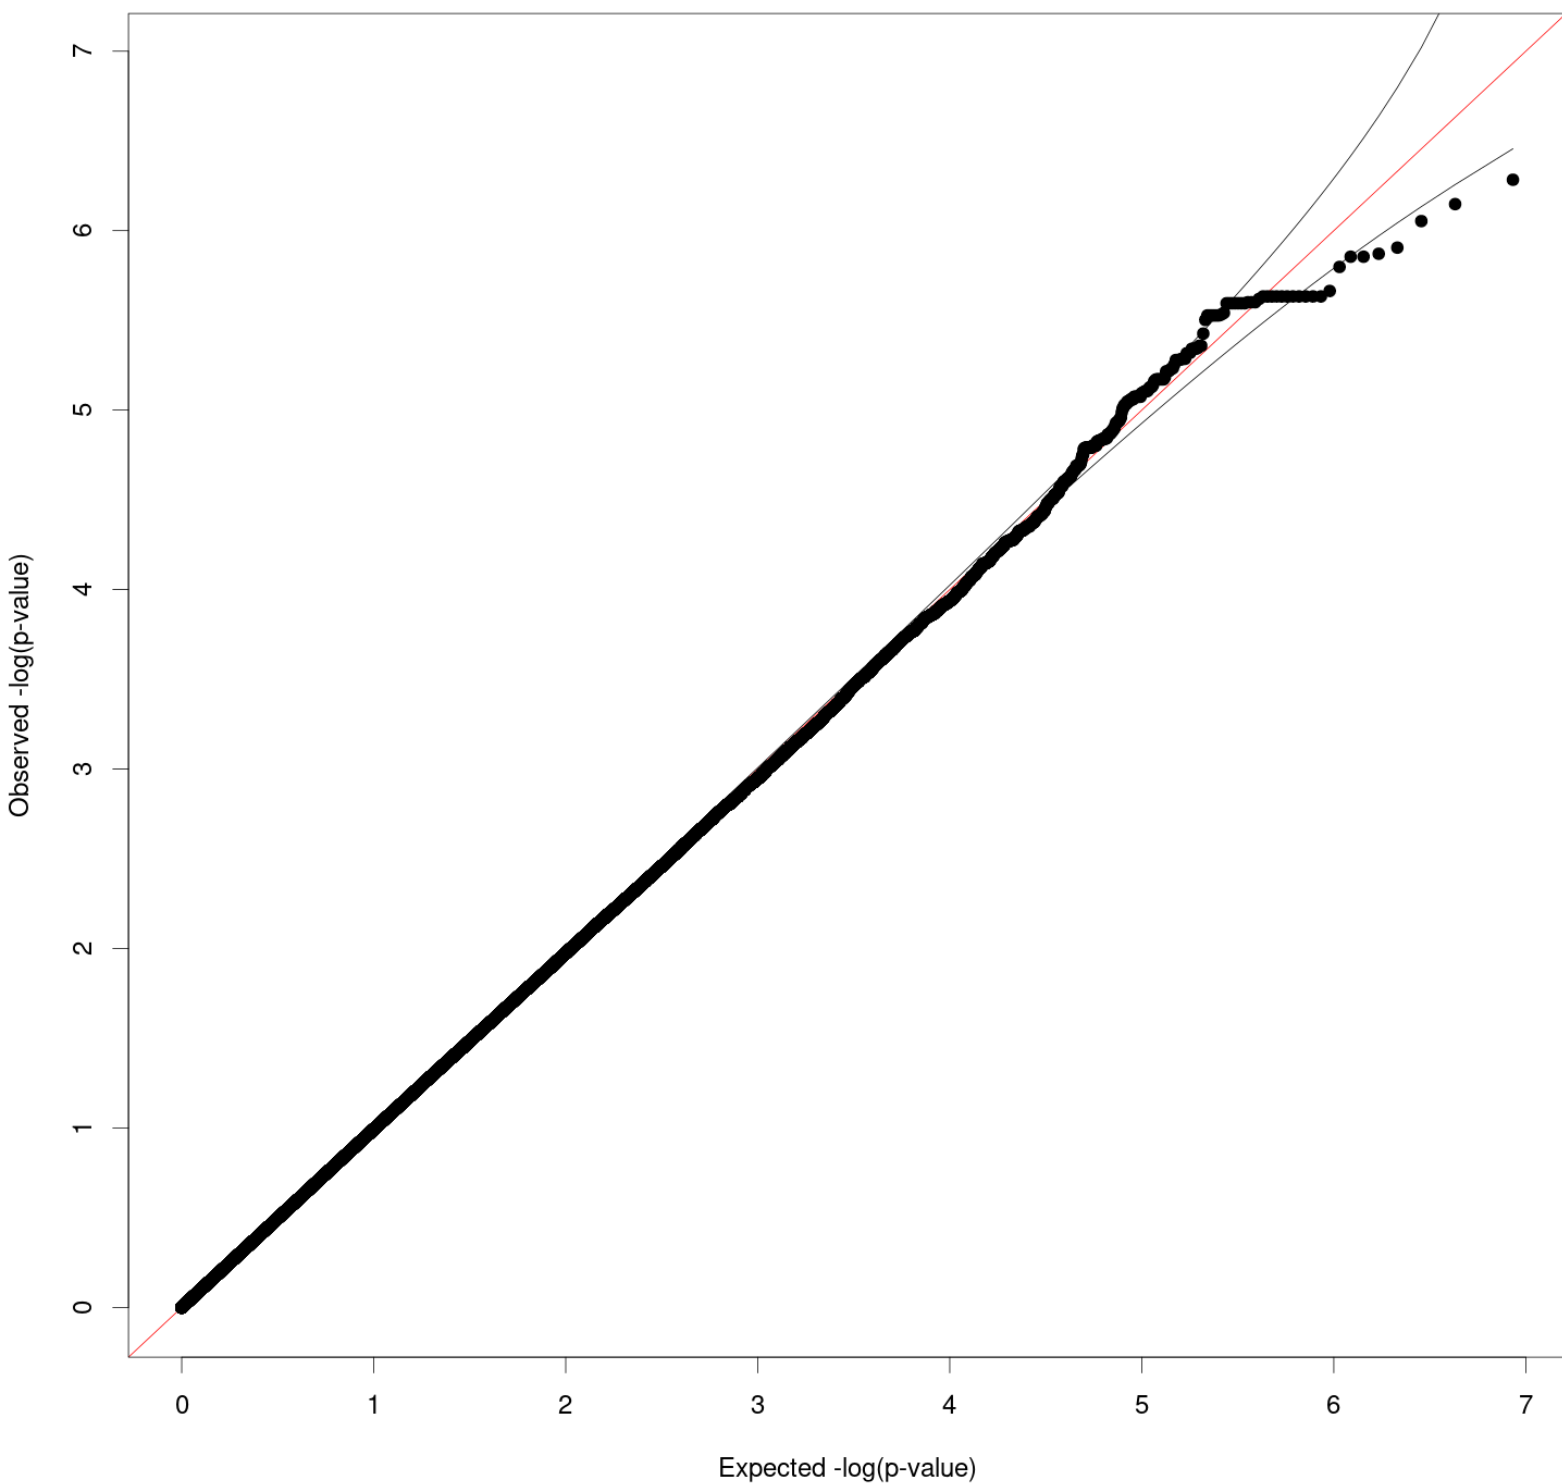

QQ plot for mz281.2493\_t256.8, elaidic acid  
inflation factor = 1.007

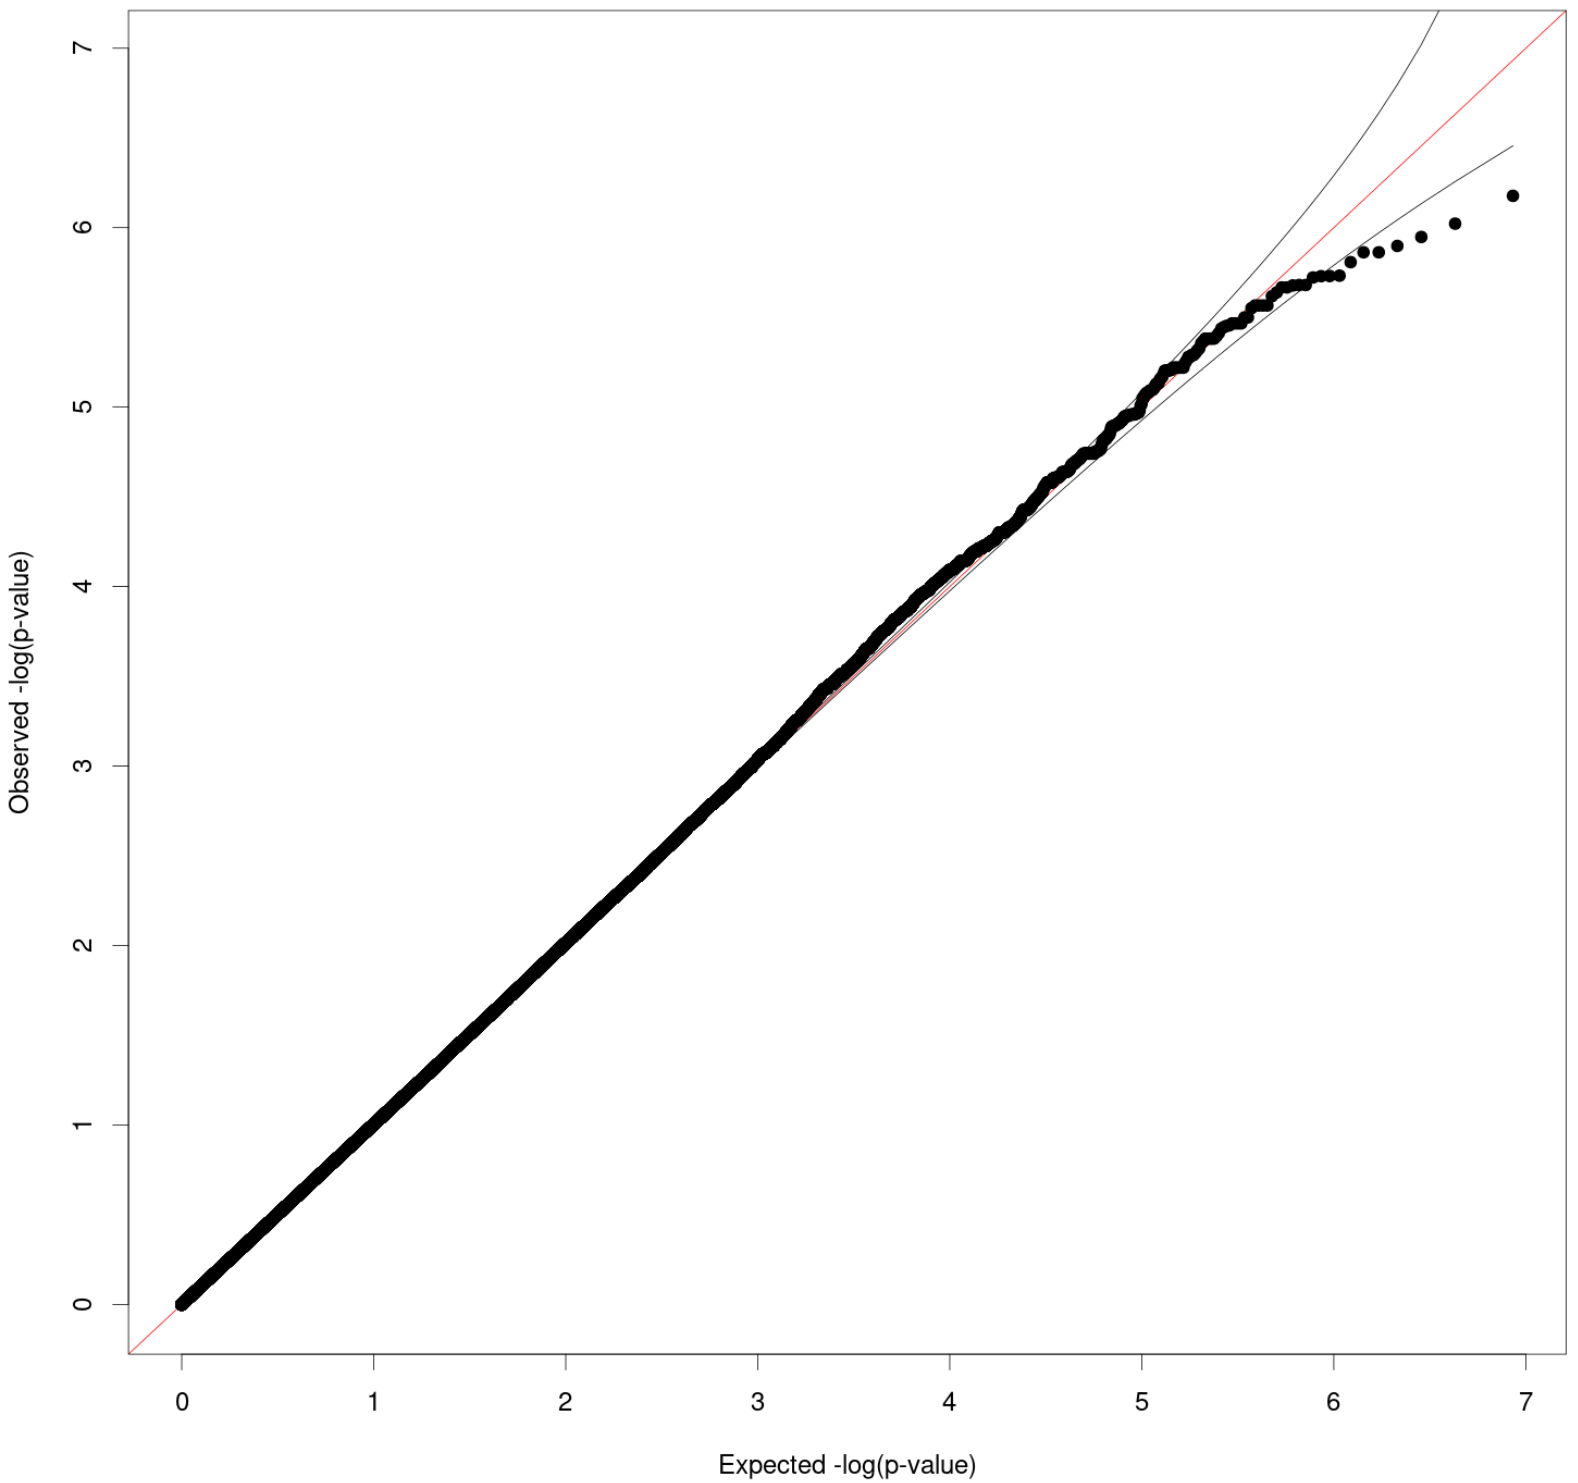

QQ plot for mz283.265\_t282.7, stearate  
inflation factor = 0.9998

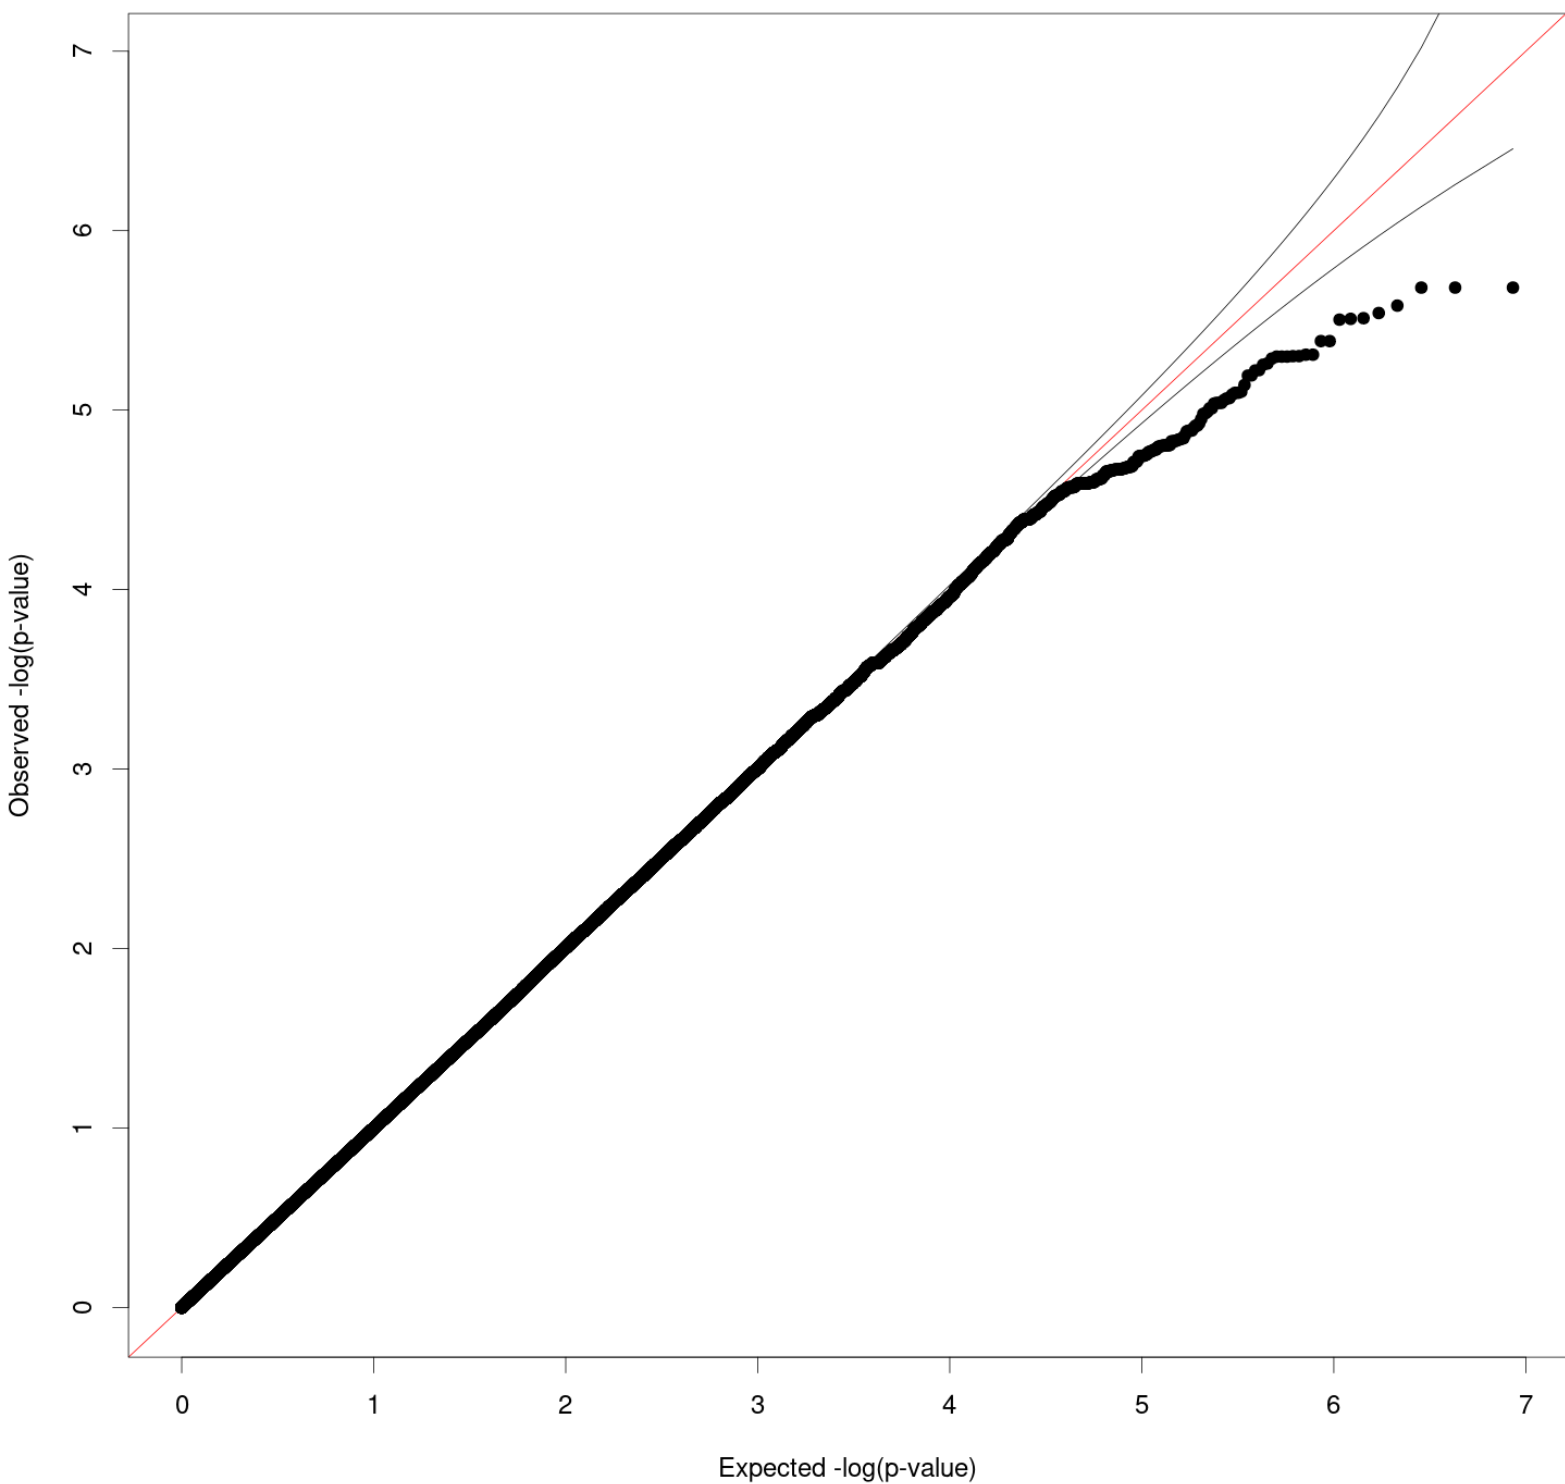

QQ plot for mz301.239\_t252, rac-glycerol 1-myristate  
inflation factor = 1.008

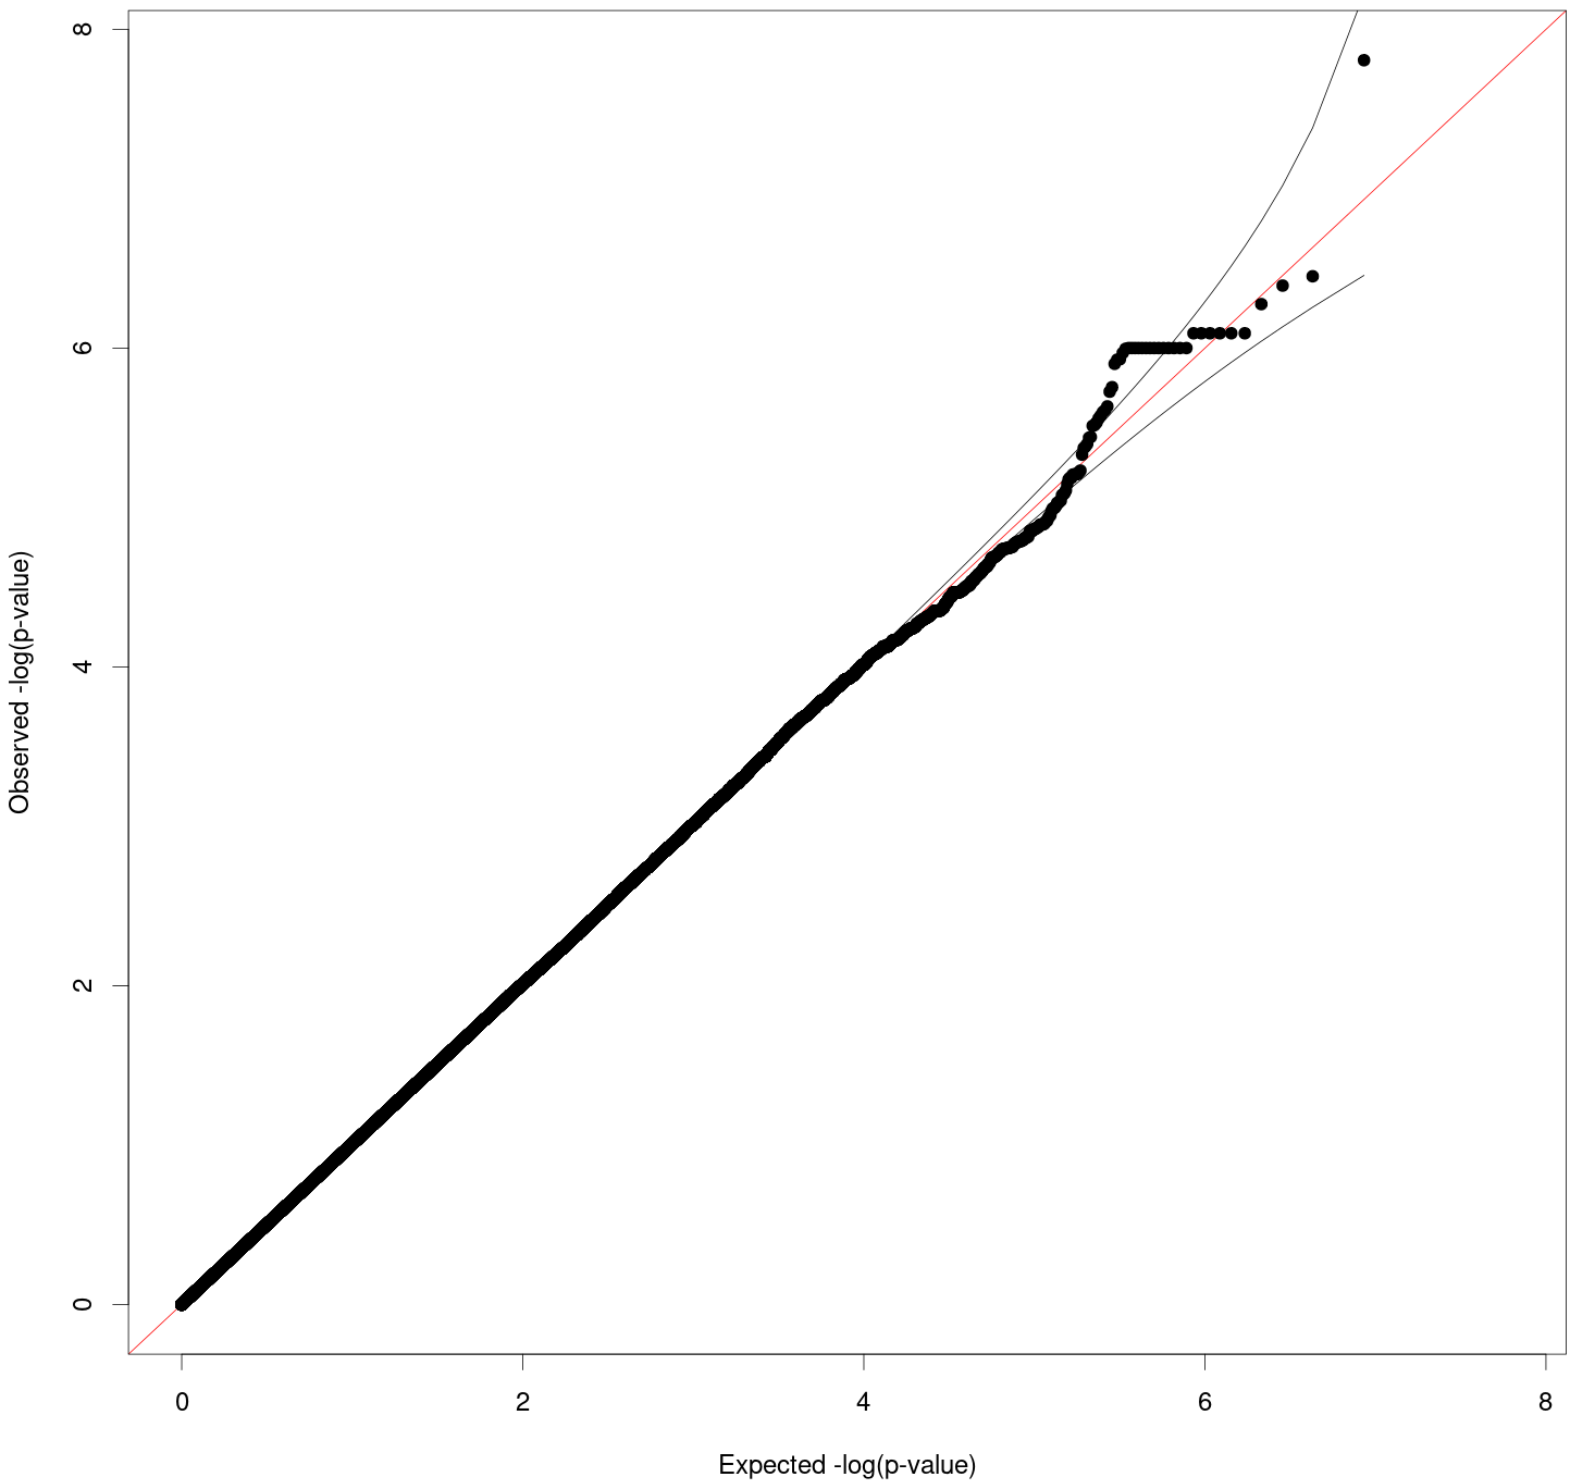

QQ plot for mz301.2167\_t26.6, retinoate  
inflation factor = 0.995

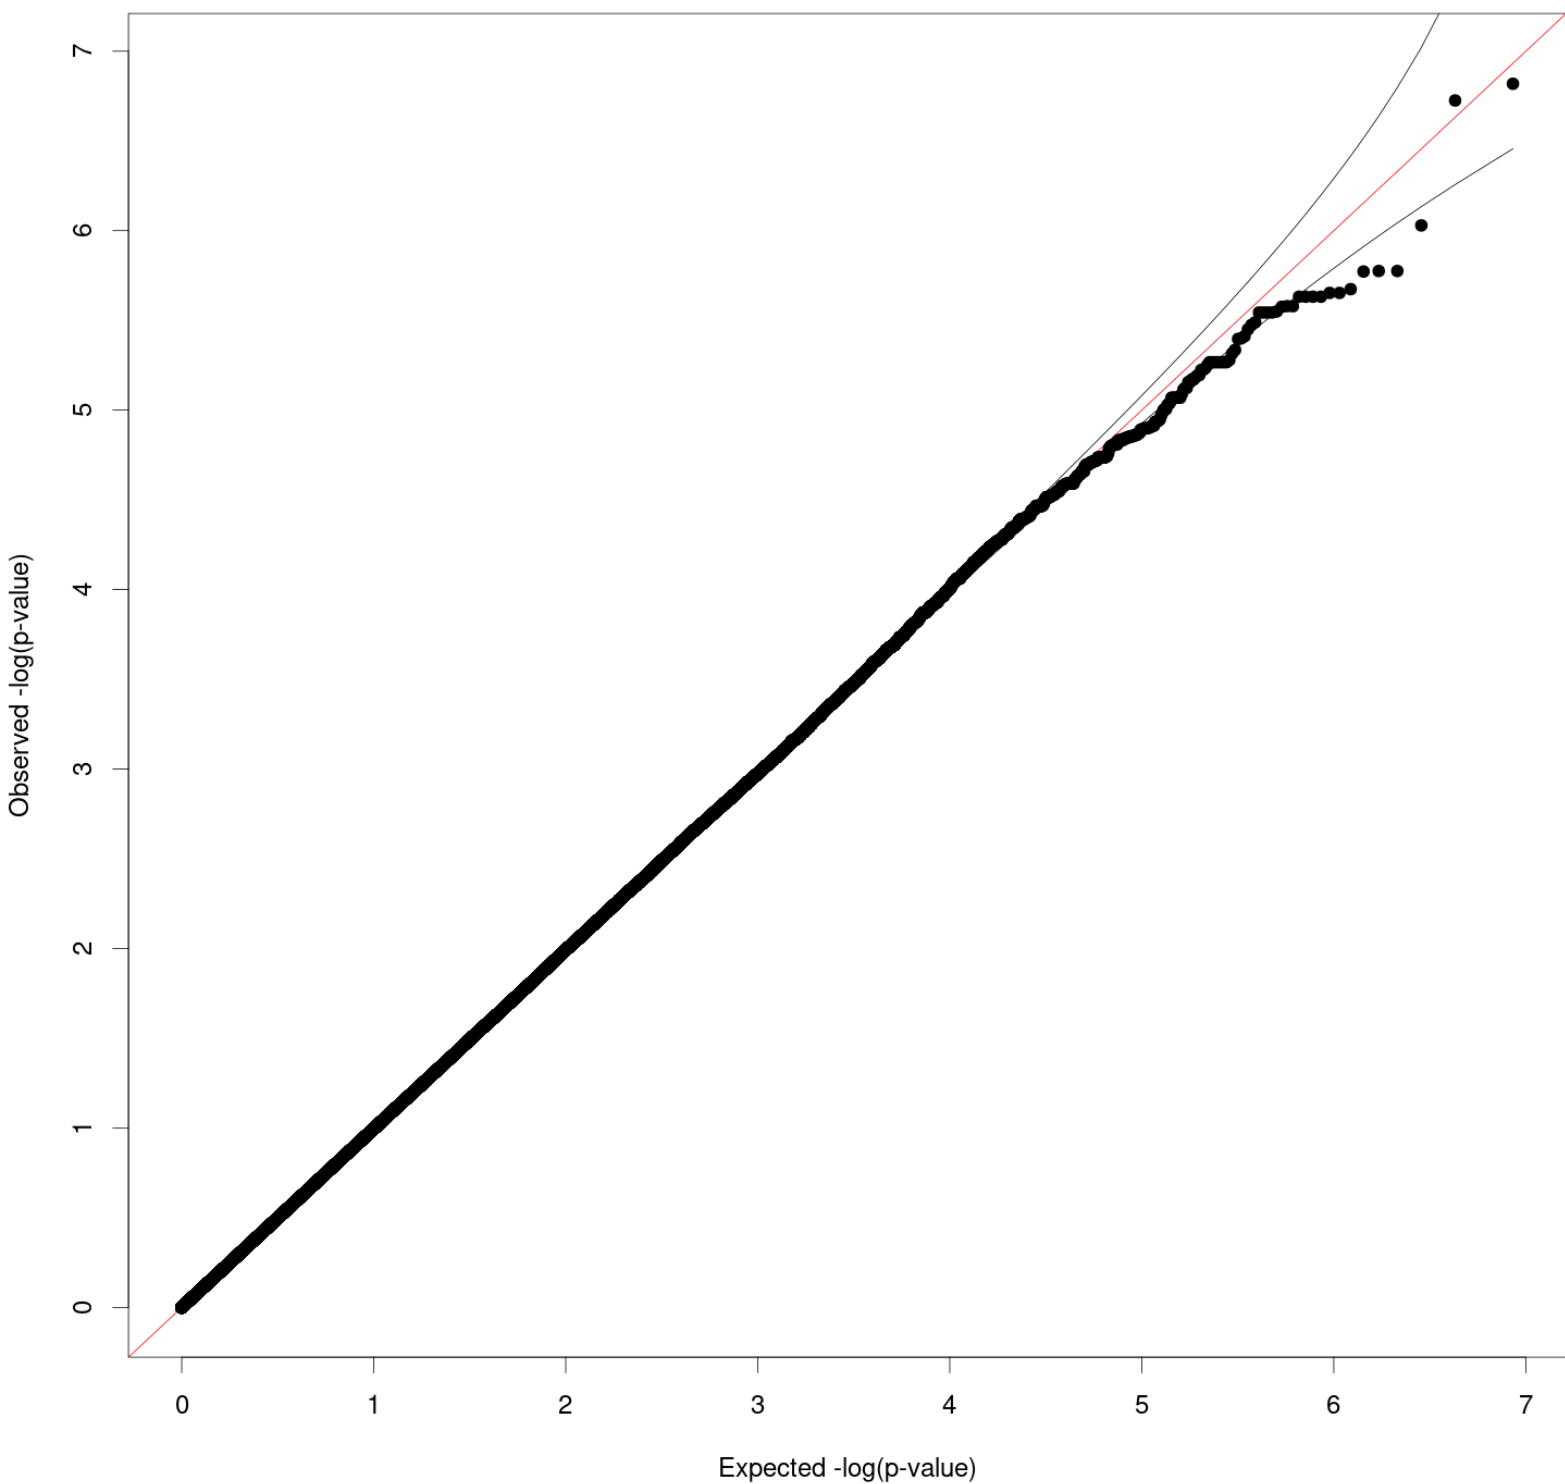

QQ plot for mz302.3054\_t35.1, sphinganine  
inflation factor = 1.002

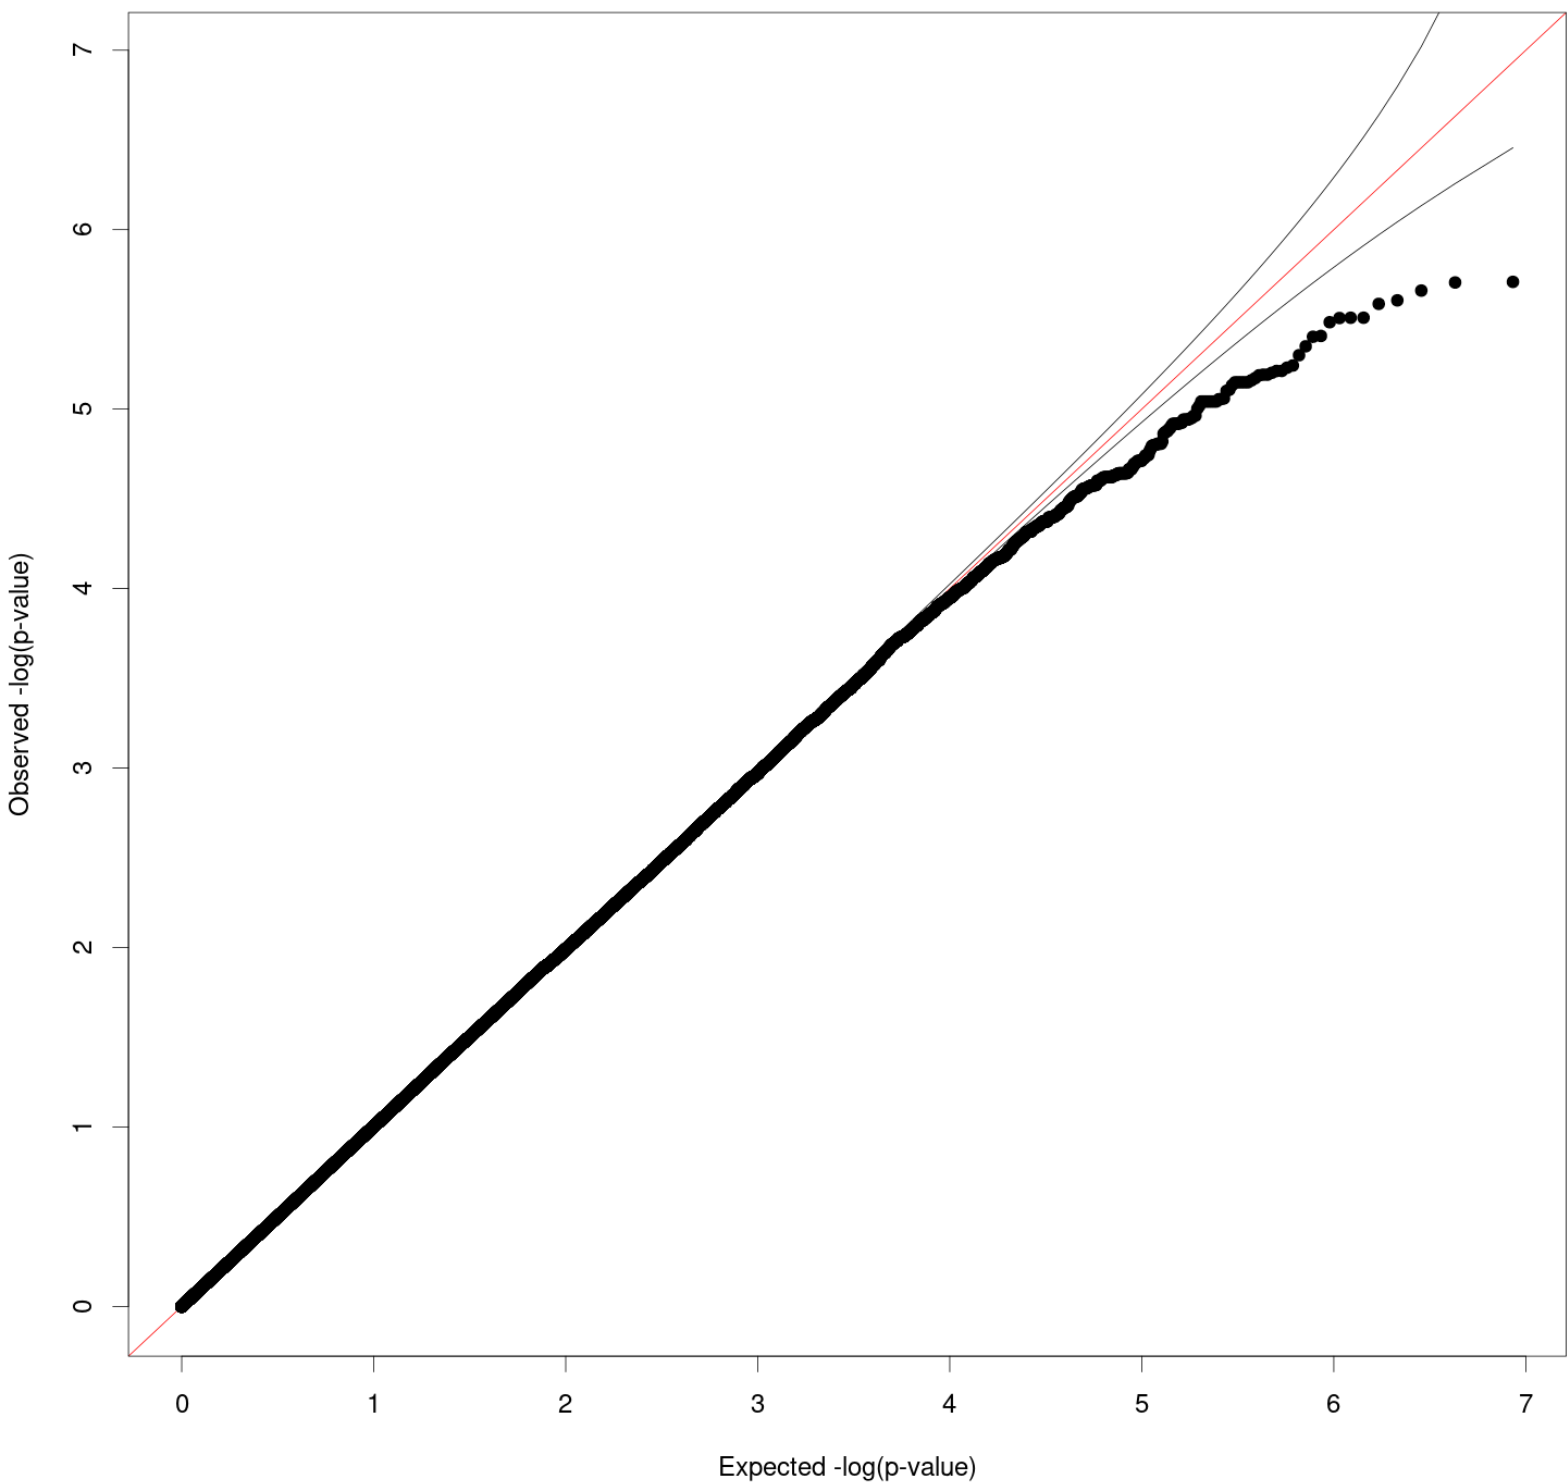

QQ plot for mz307.0316\_t28.5, 2'-deoxyuridine 5'-mono-phosphate  
inflation factor = 1.001

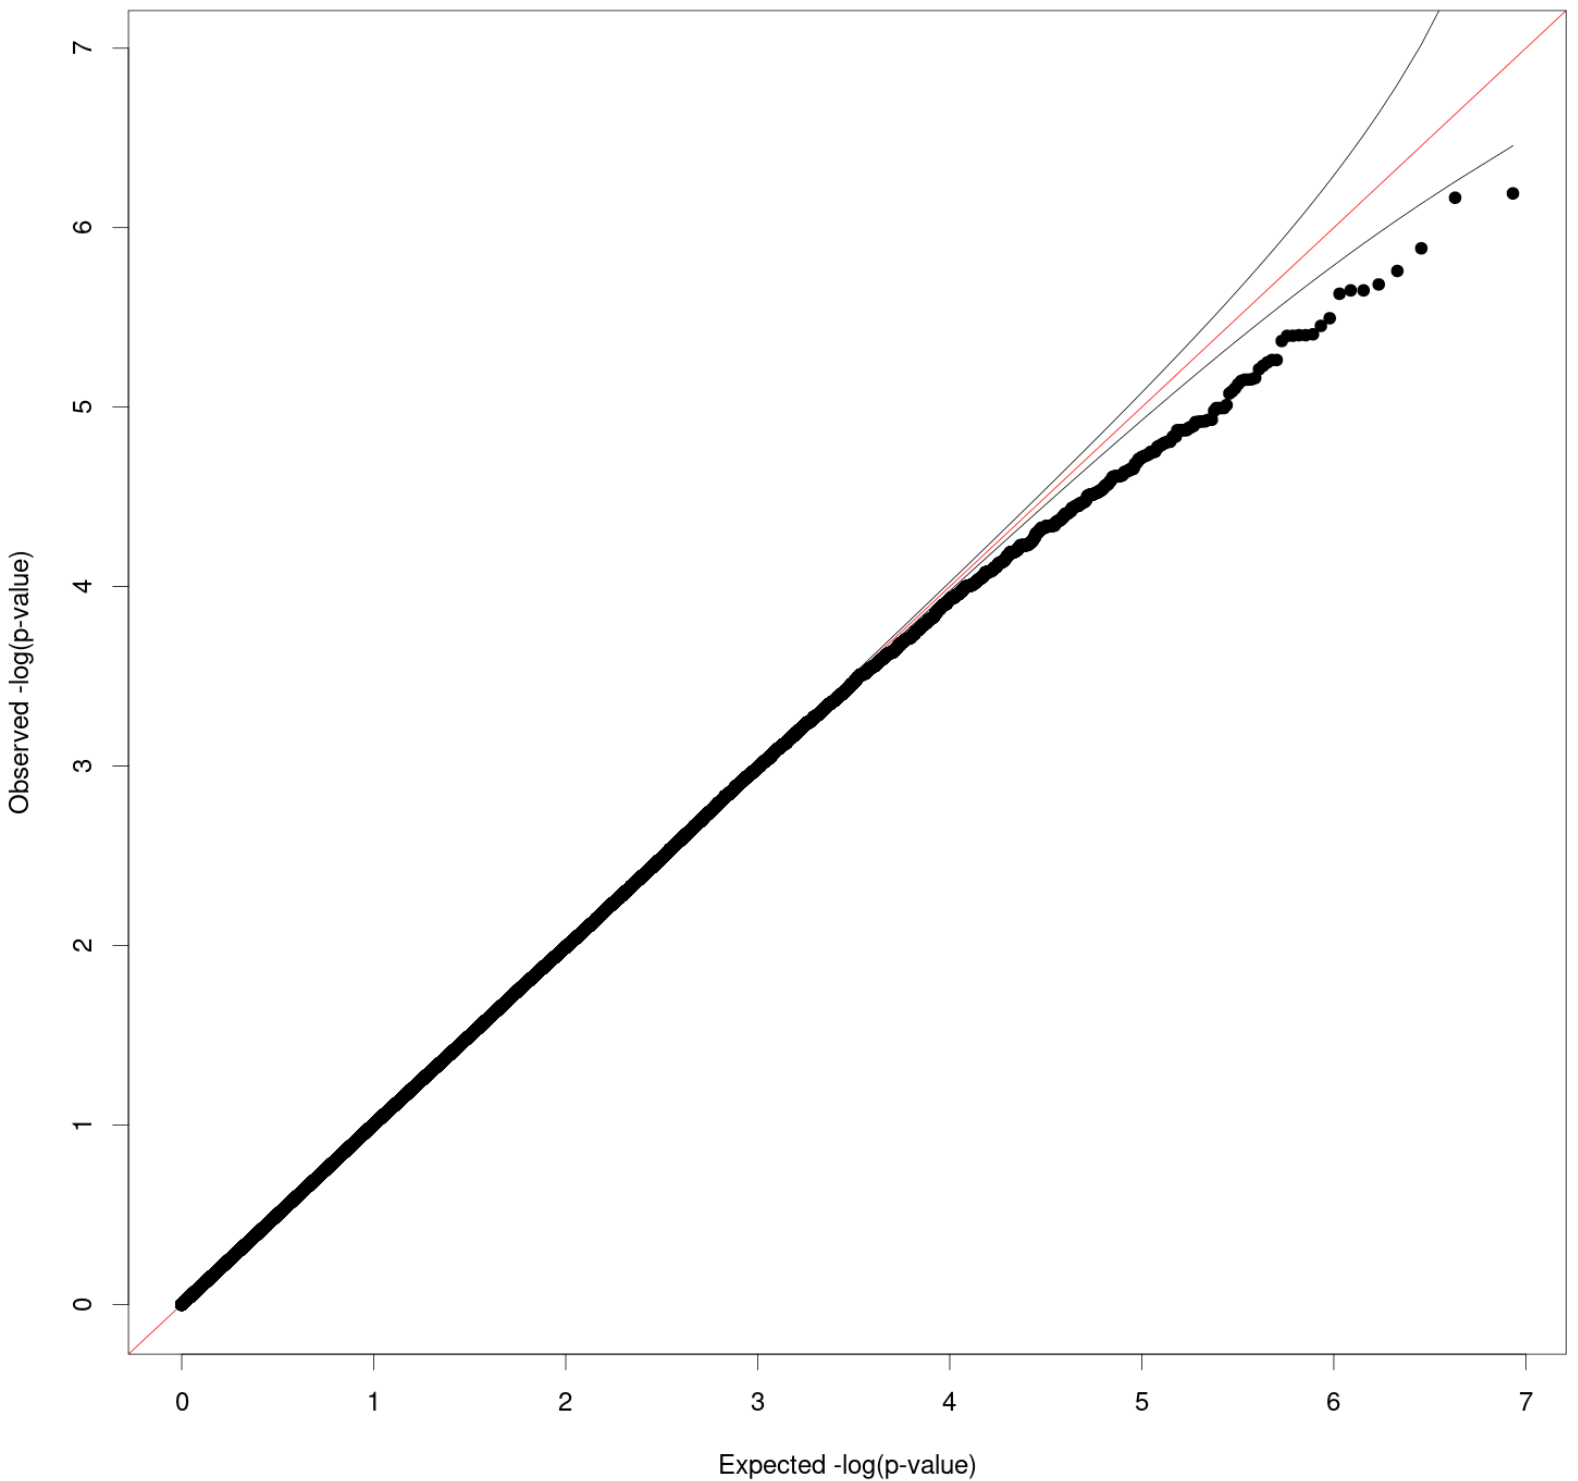



QQ plot for mz308.1\_t22.3, n-acetylneuramate  
inflation factor = 0.9921

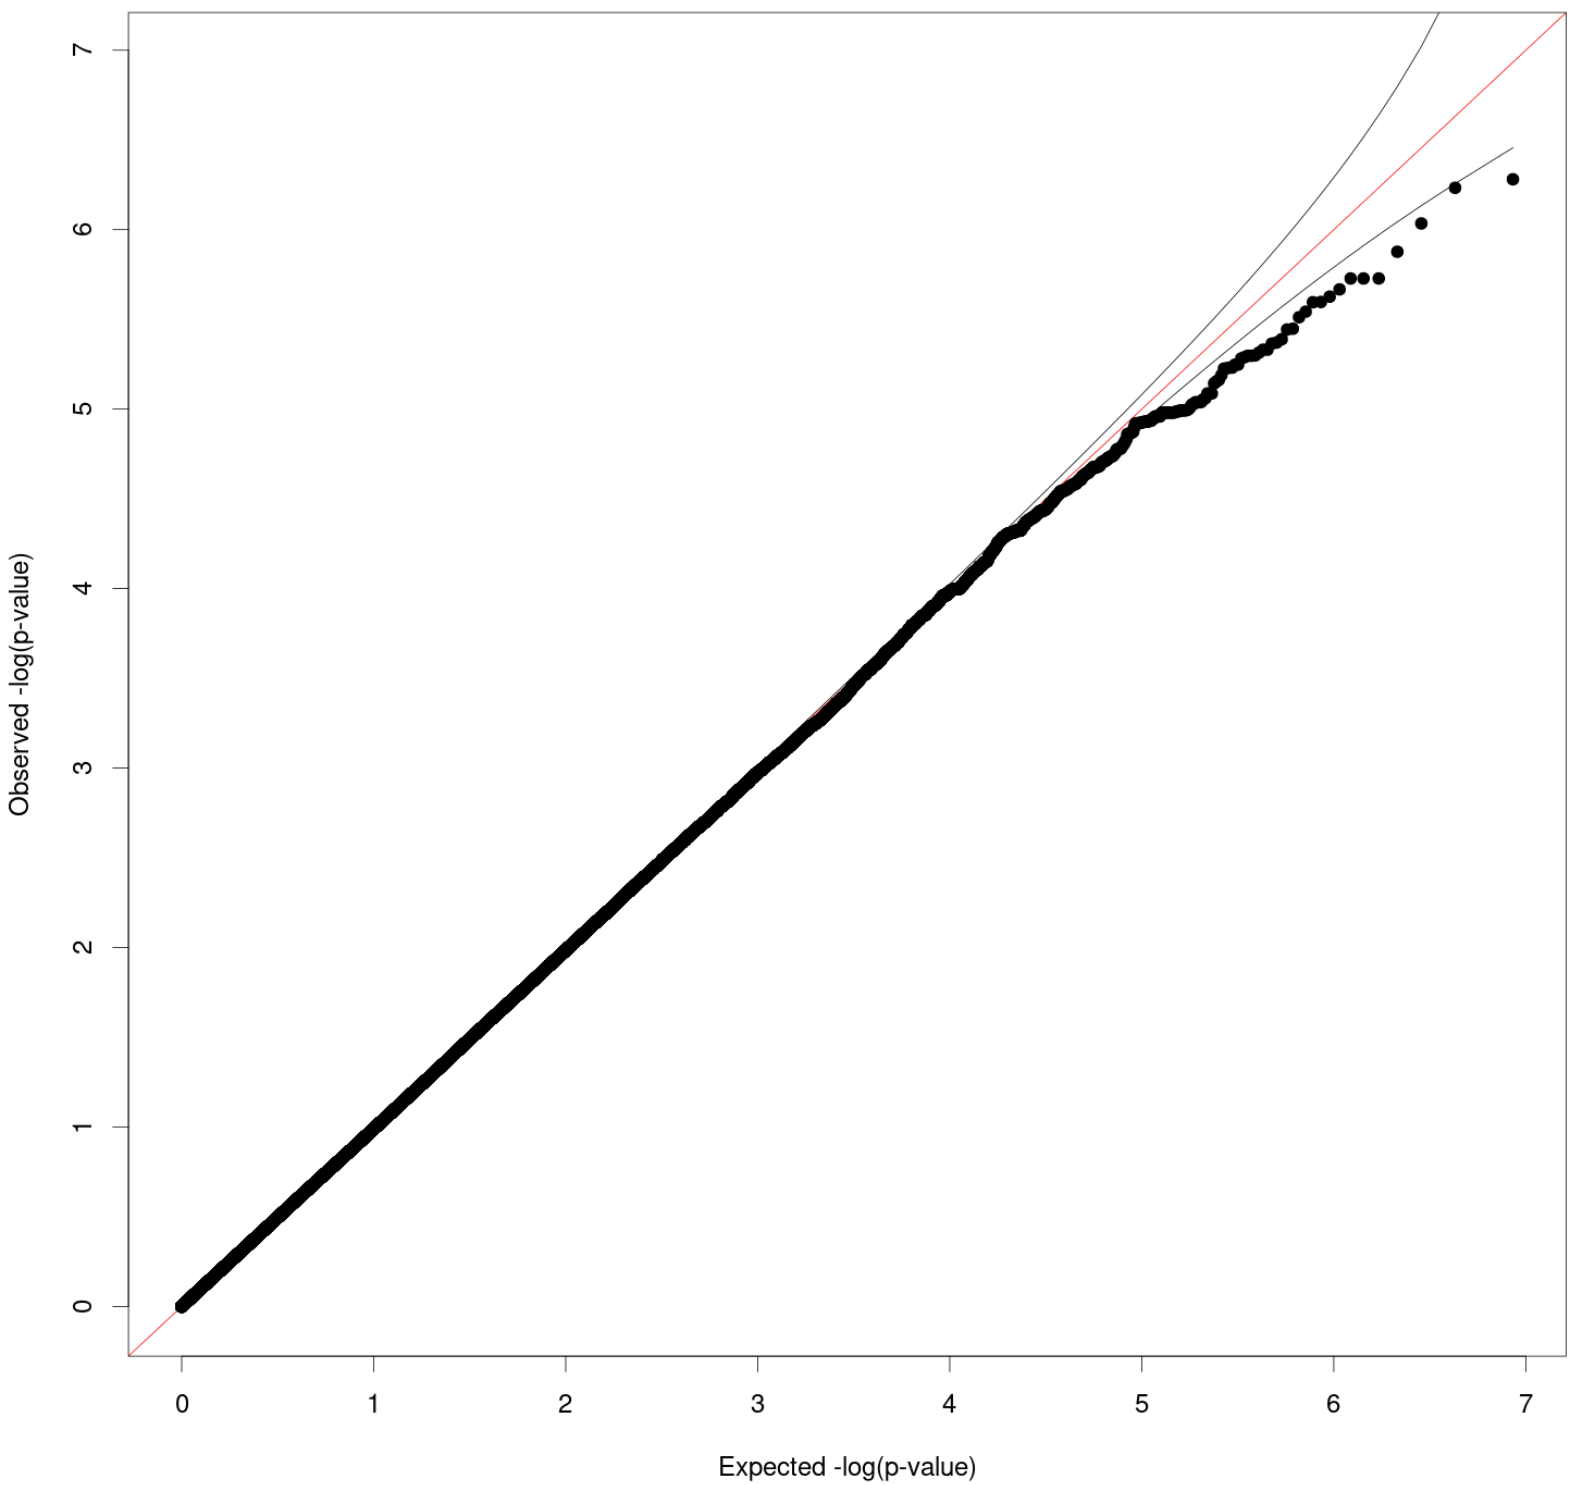

QQ plot for mz308.0929\_t55.3, glutathione  
inflation factor = 0.9845

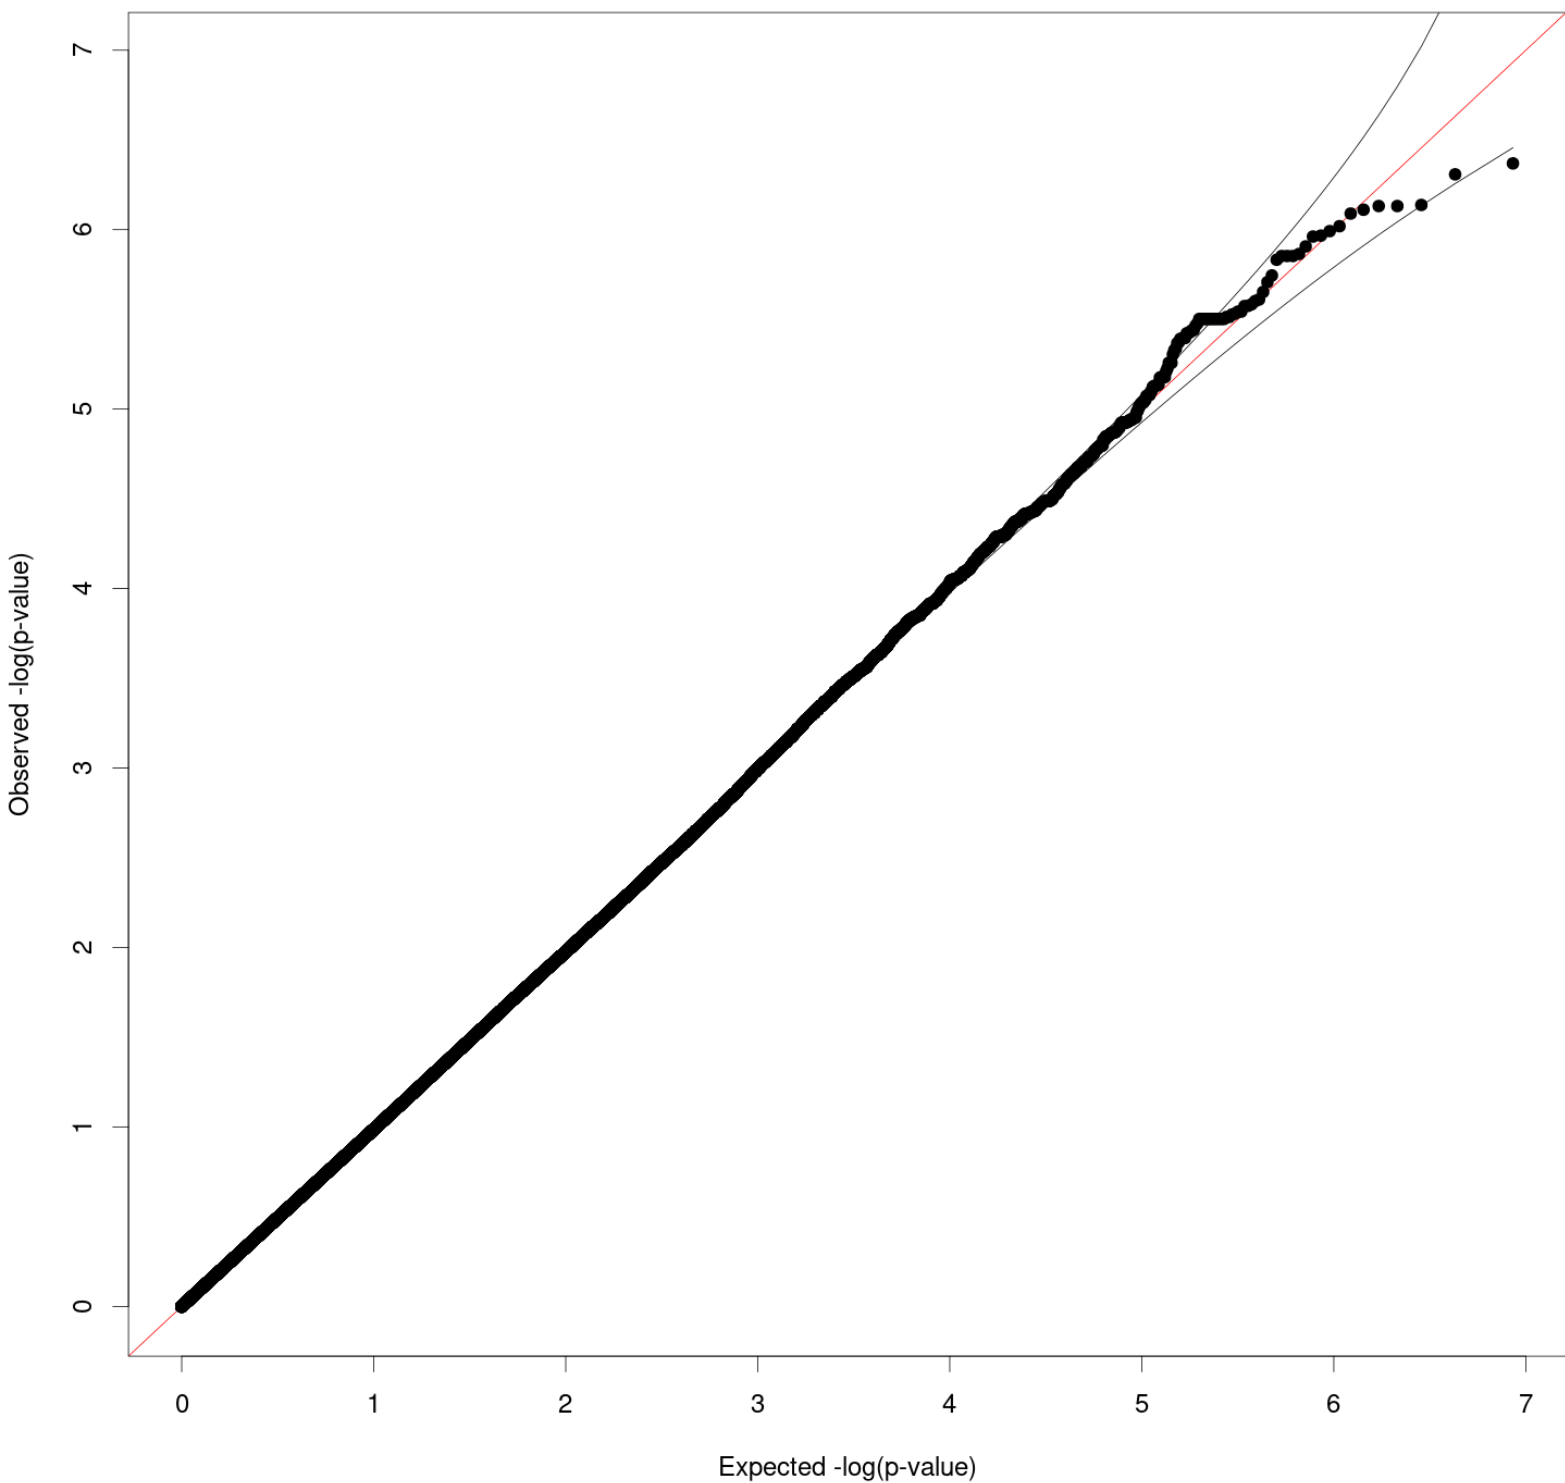

QQ plot for mz310.1137\_t48.2, n-acetylneuraminate  
inflation factor = 0.9984

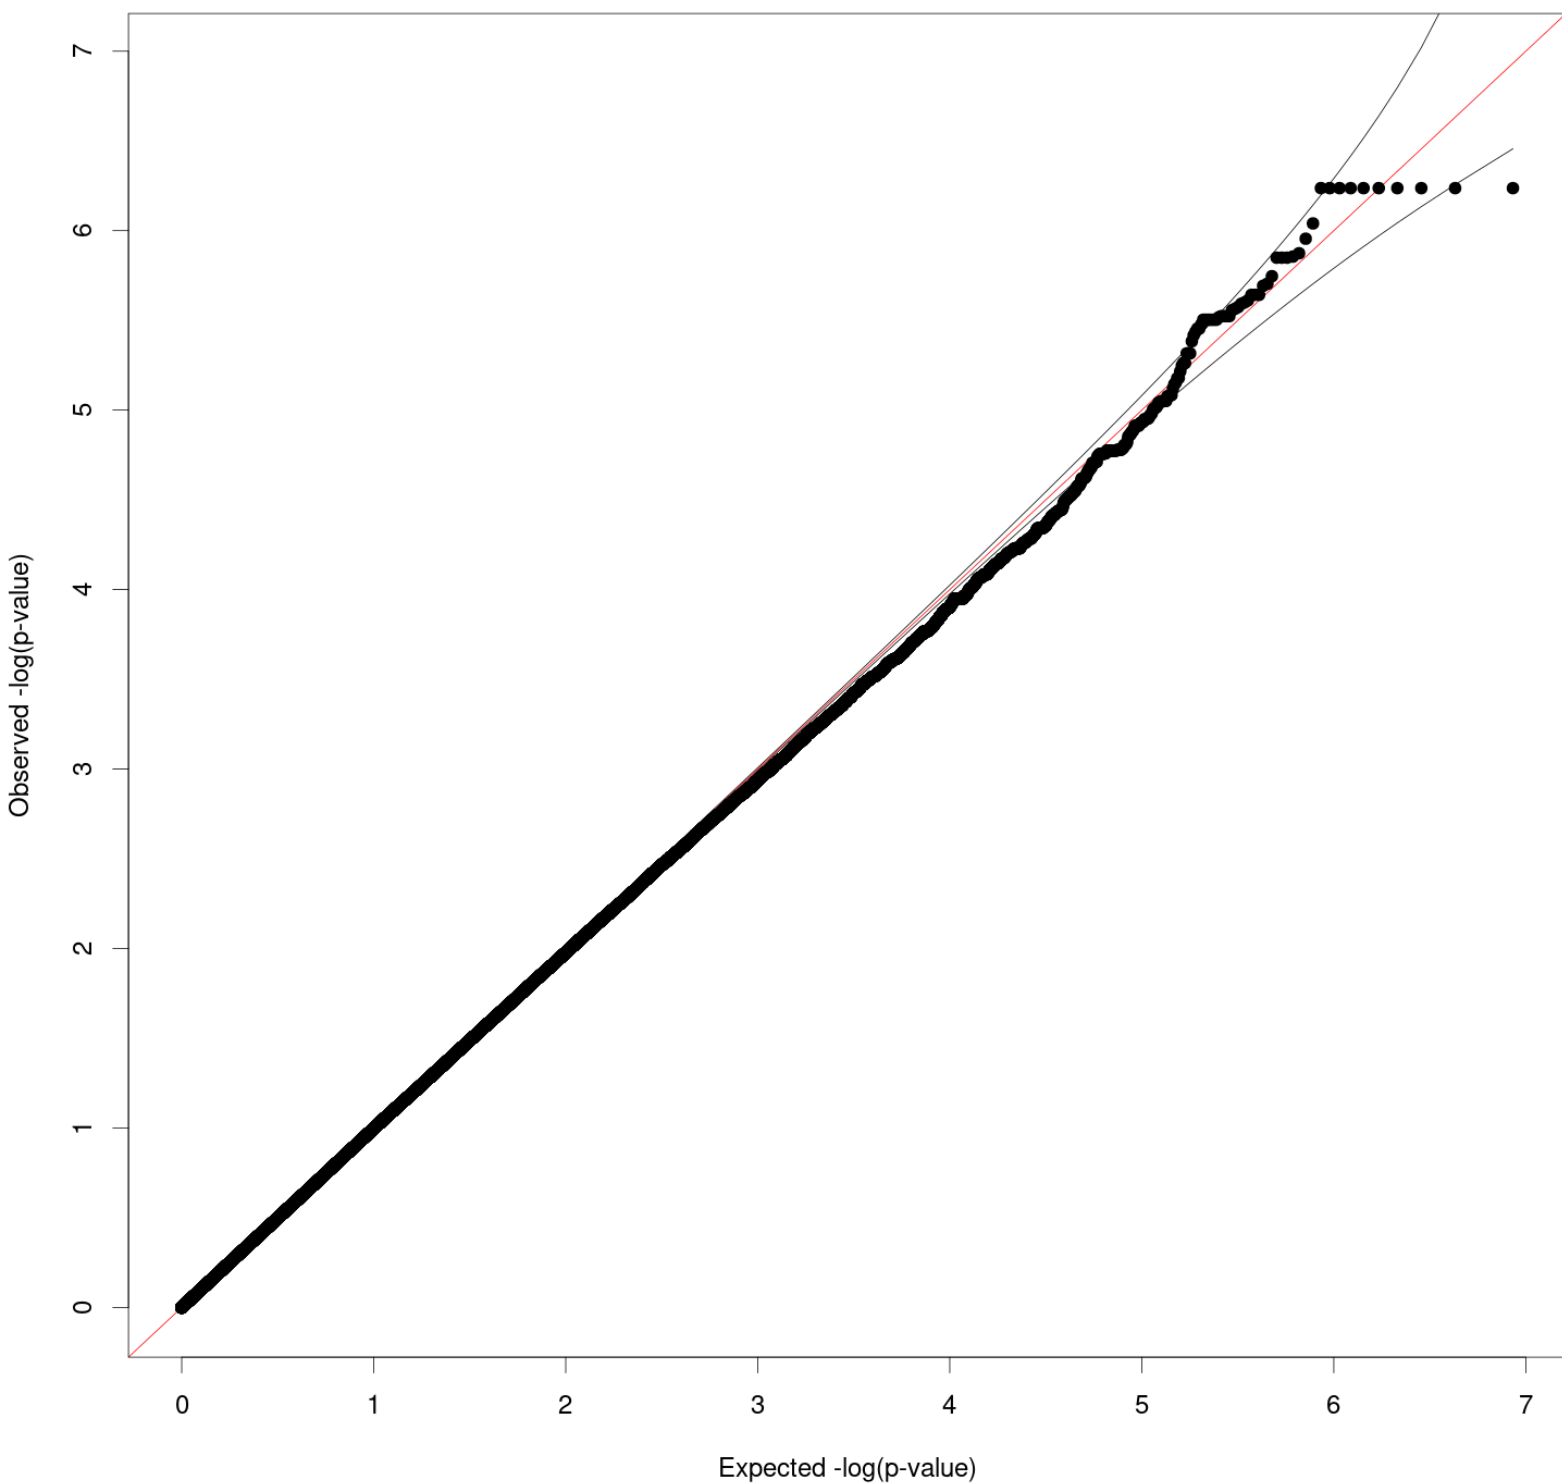

QQ plot for mz311.296\_t295.2, arachidic acid  
inflation factor = 1.01

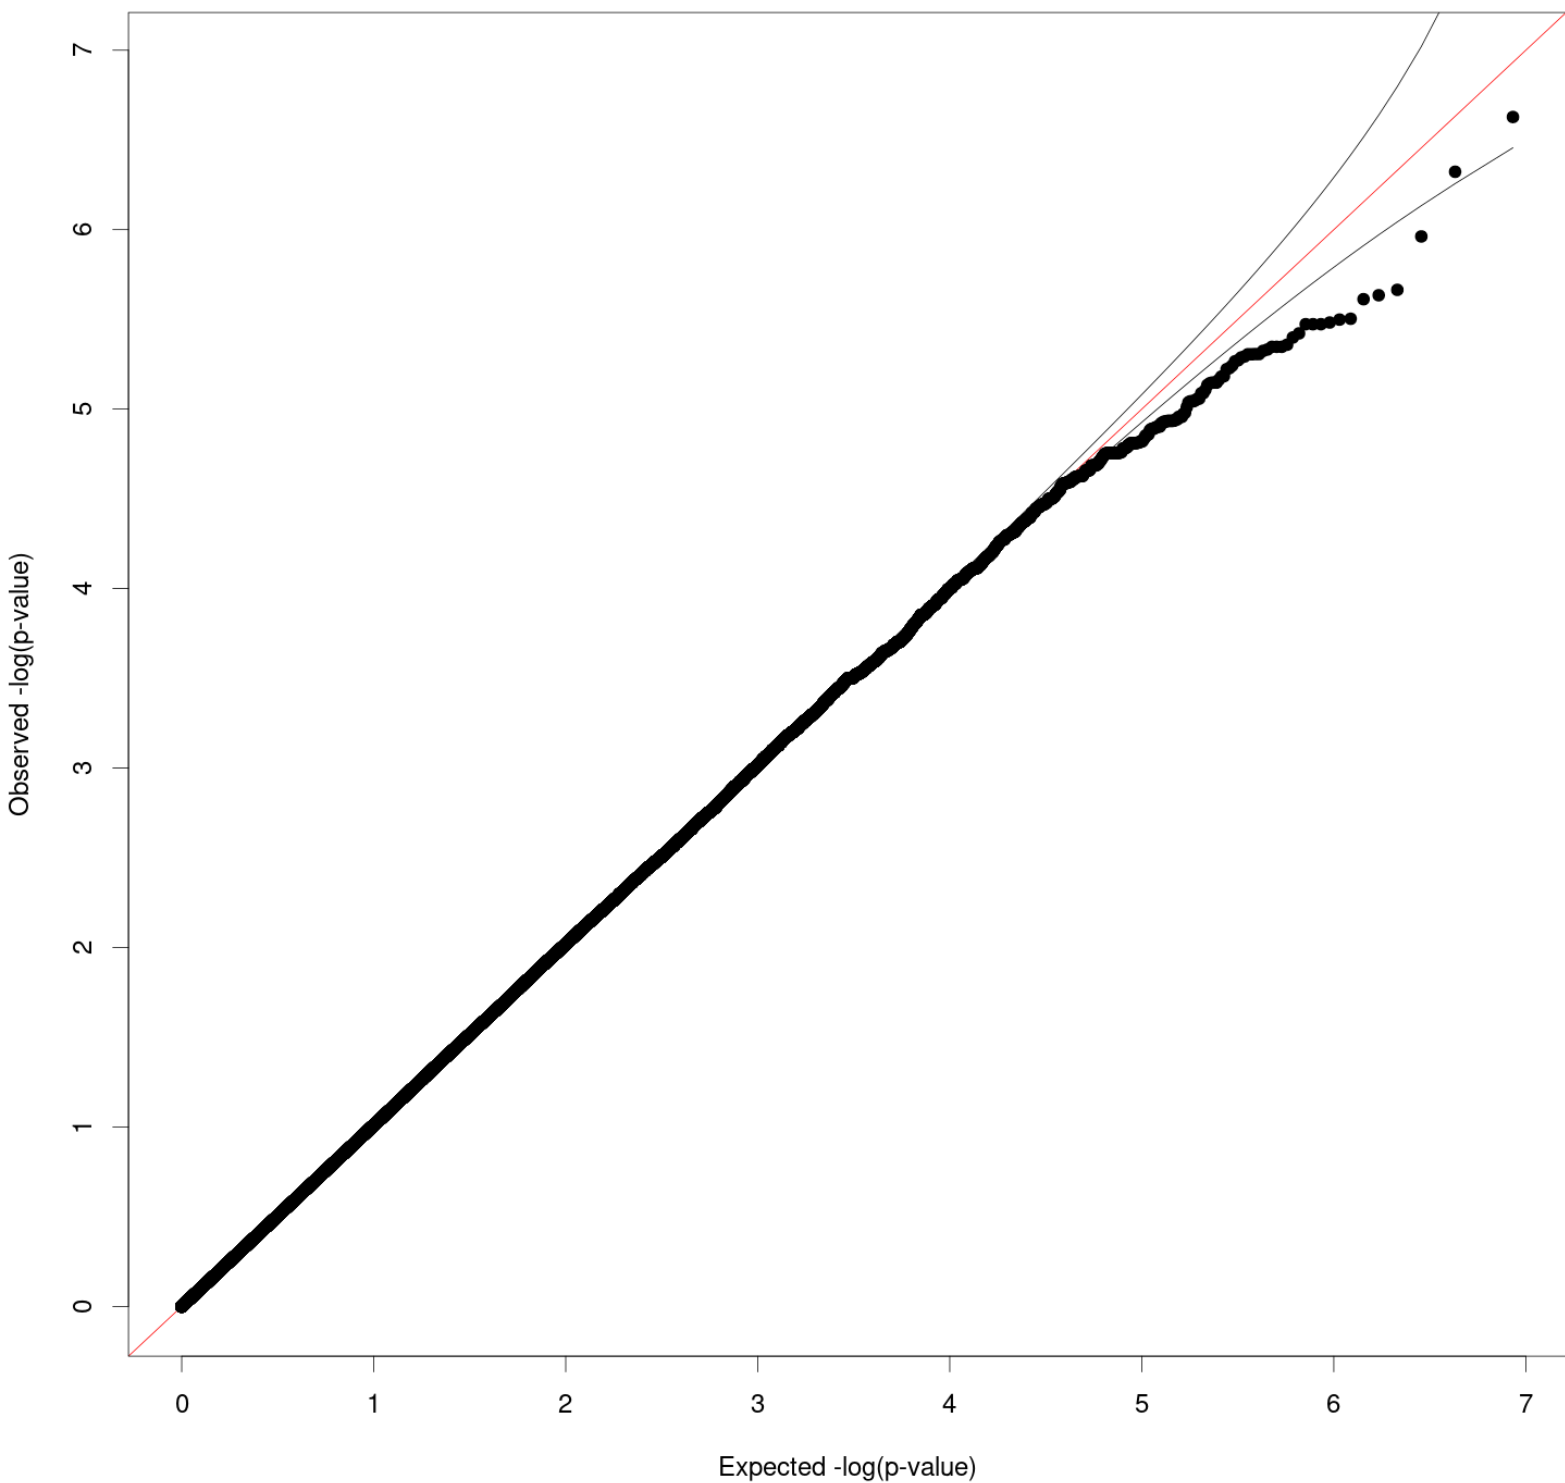

QQ plot for mz319.0692\_t48.2, melanin  
inflation factor = 1.002

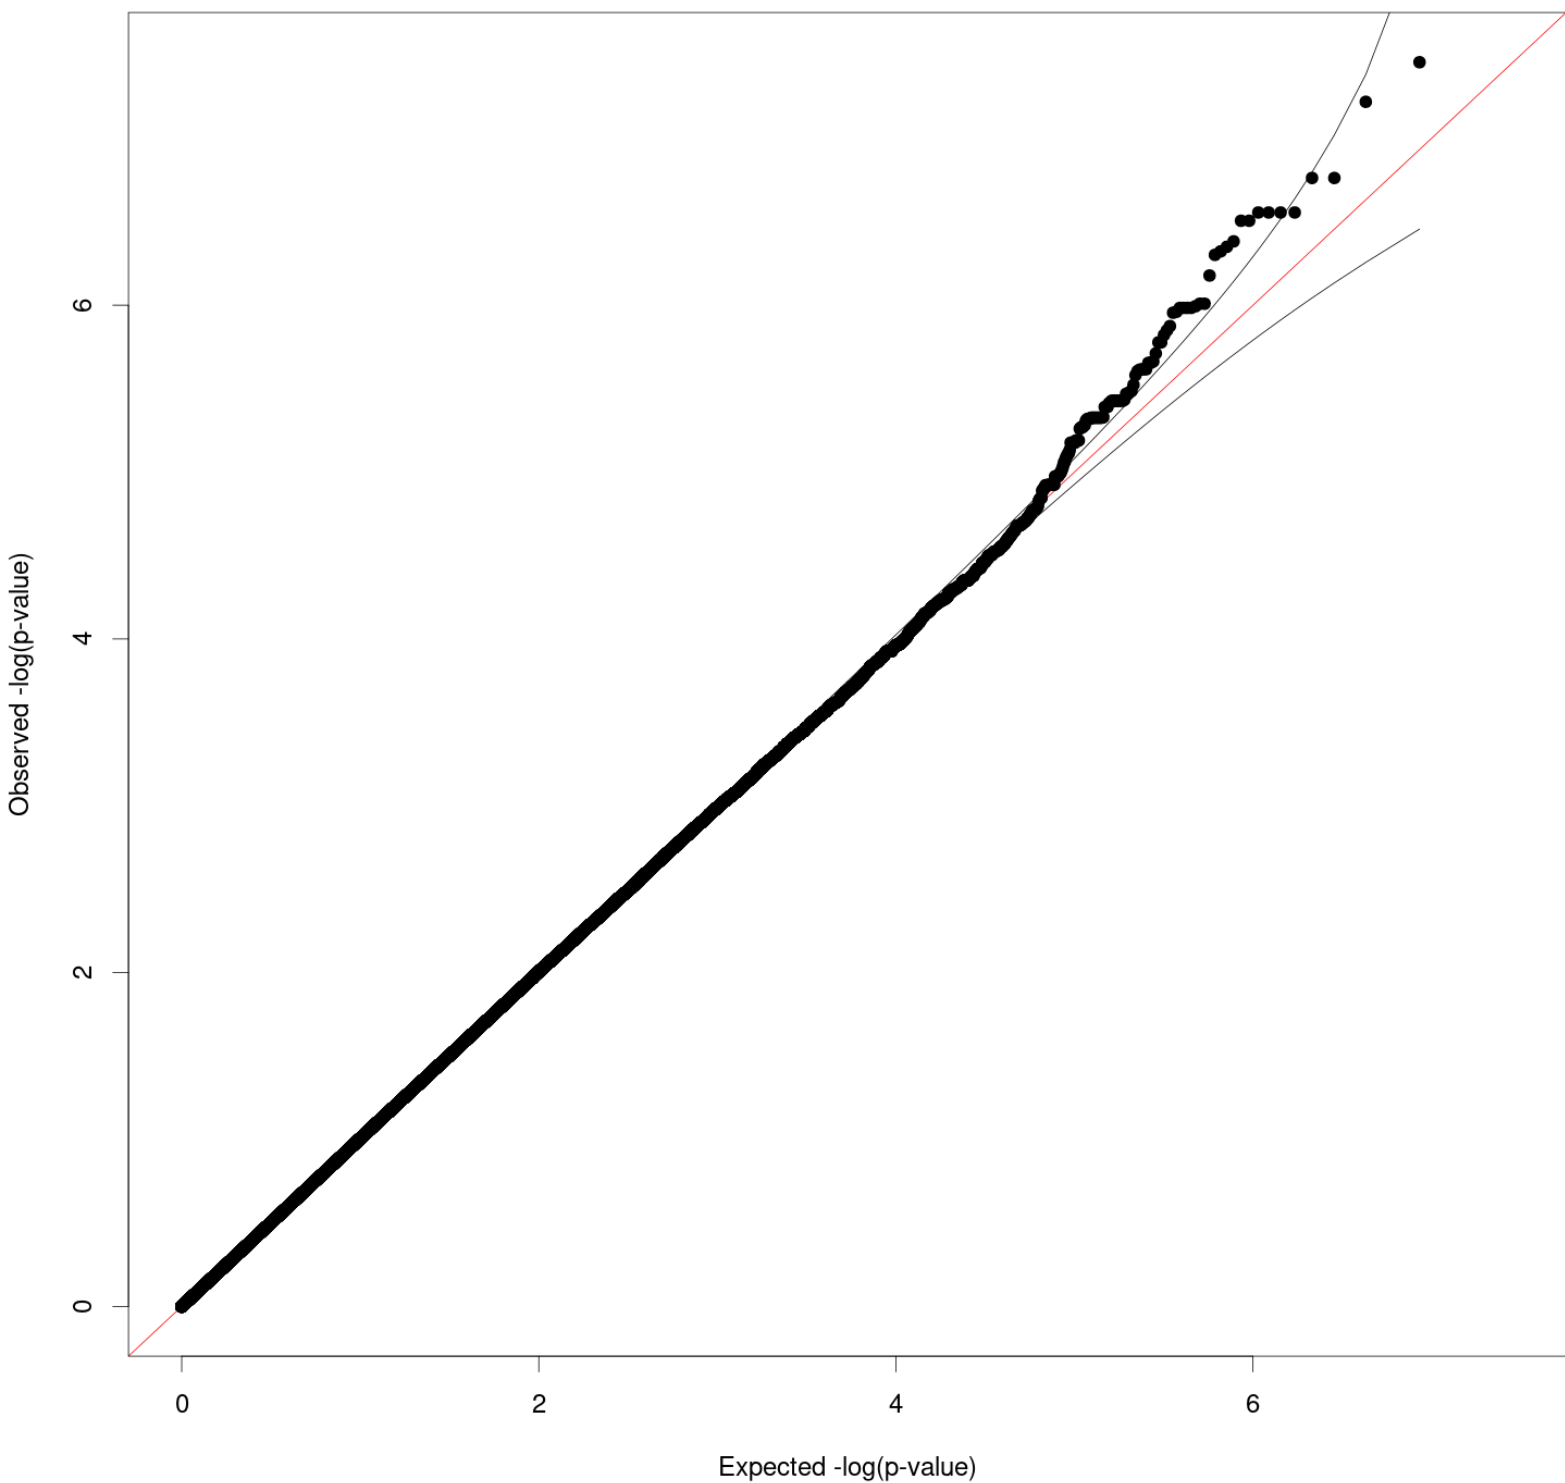

QQ plot for mz329.2502\_t29.9, docosahexaenoic acid  
inflation factor = 1.009

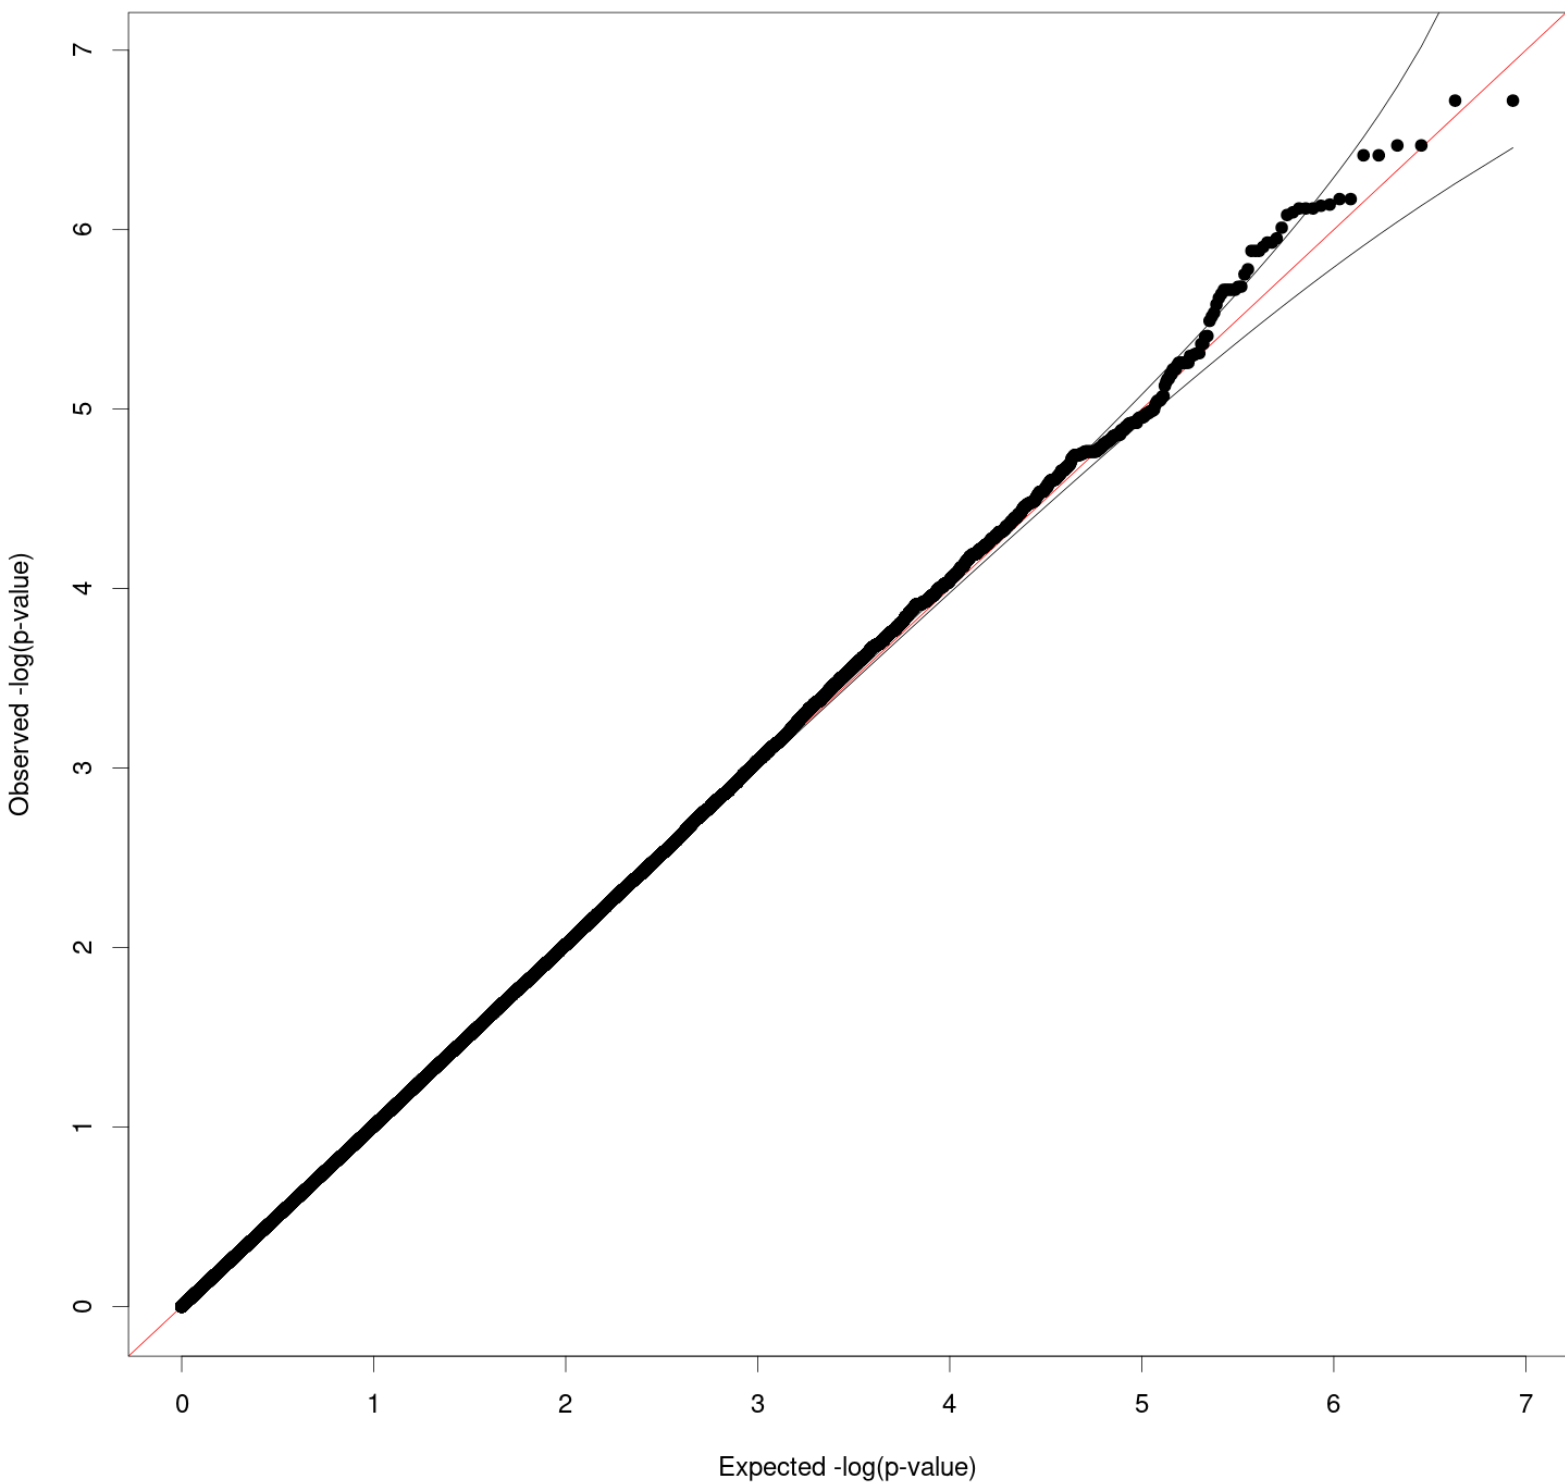

QQ plot for mz330.0603\_t50, adenosine 3,5-cyclic monophosphate  
inflation factor = 0.9908

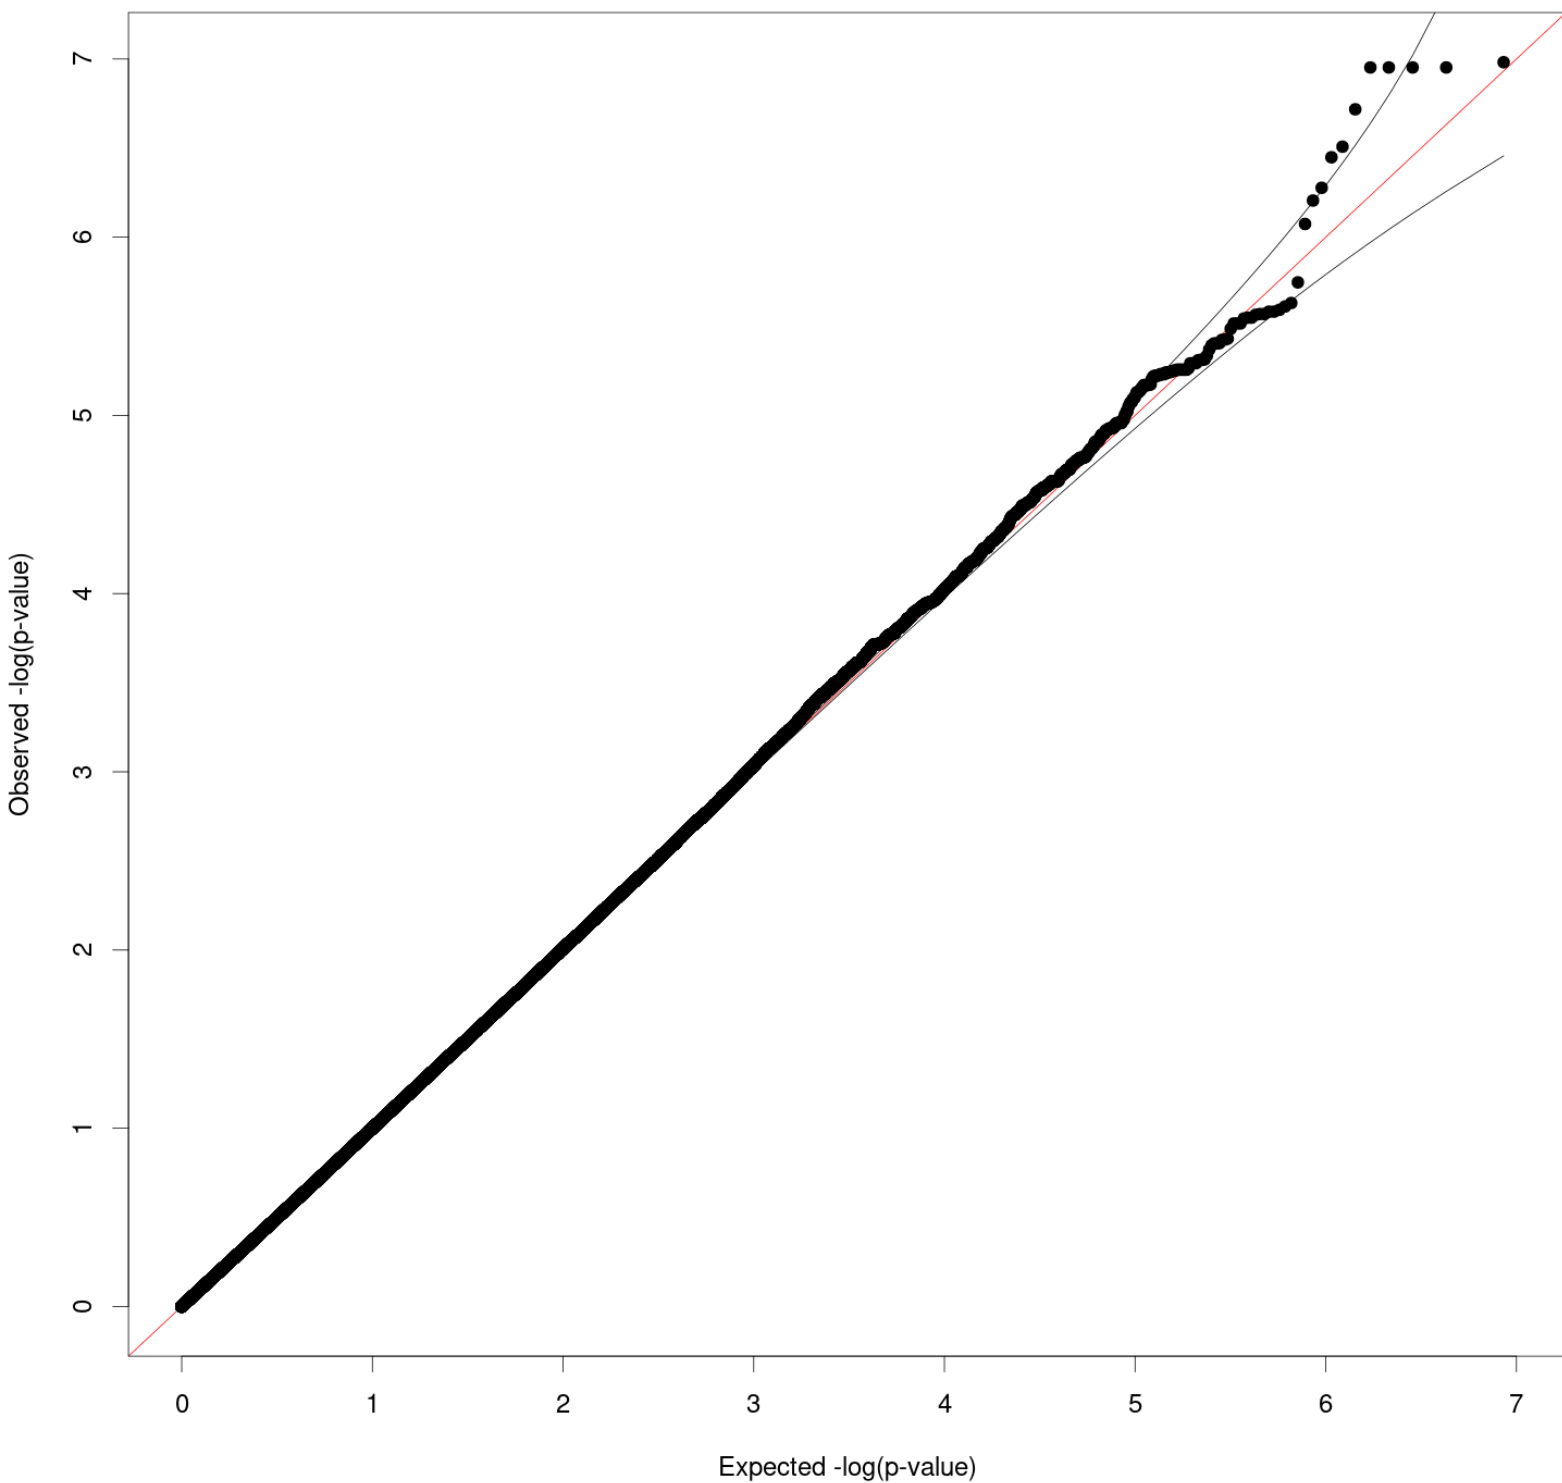

QQ plot for mz337.0532\_t26.4, 5-aminoimidazole-4-carboxamide-1-beta-d-ribofuranosyl 5'-monophosphate  
inflation factor = 0.9991

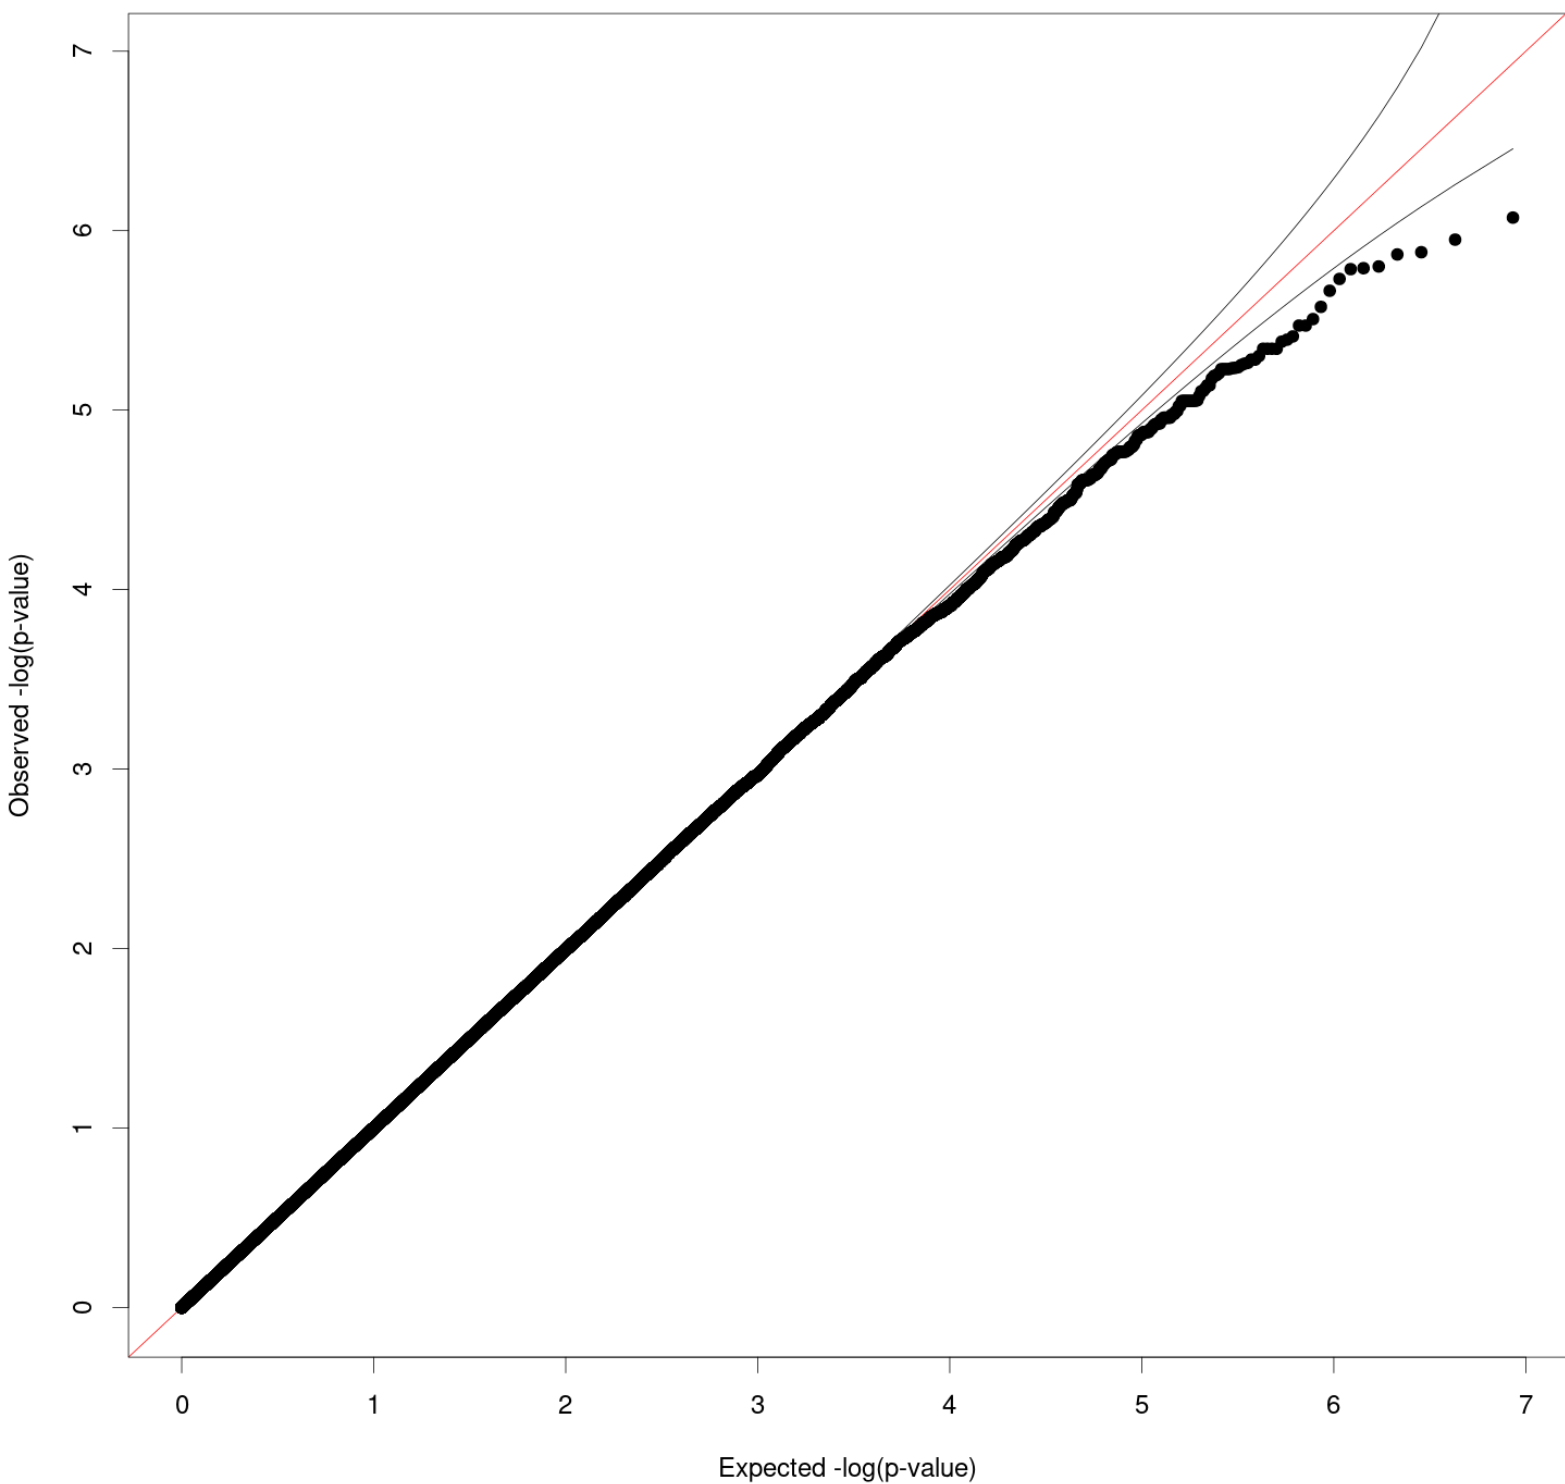



QQ plot for mz344.2795\_t32.4, lauroylcarnitine  
inflation factor = 1.003

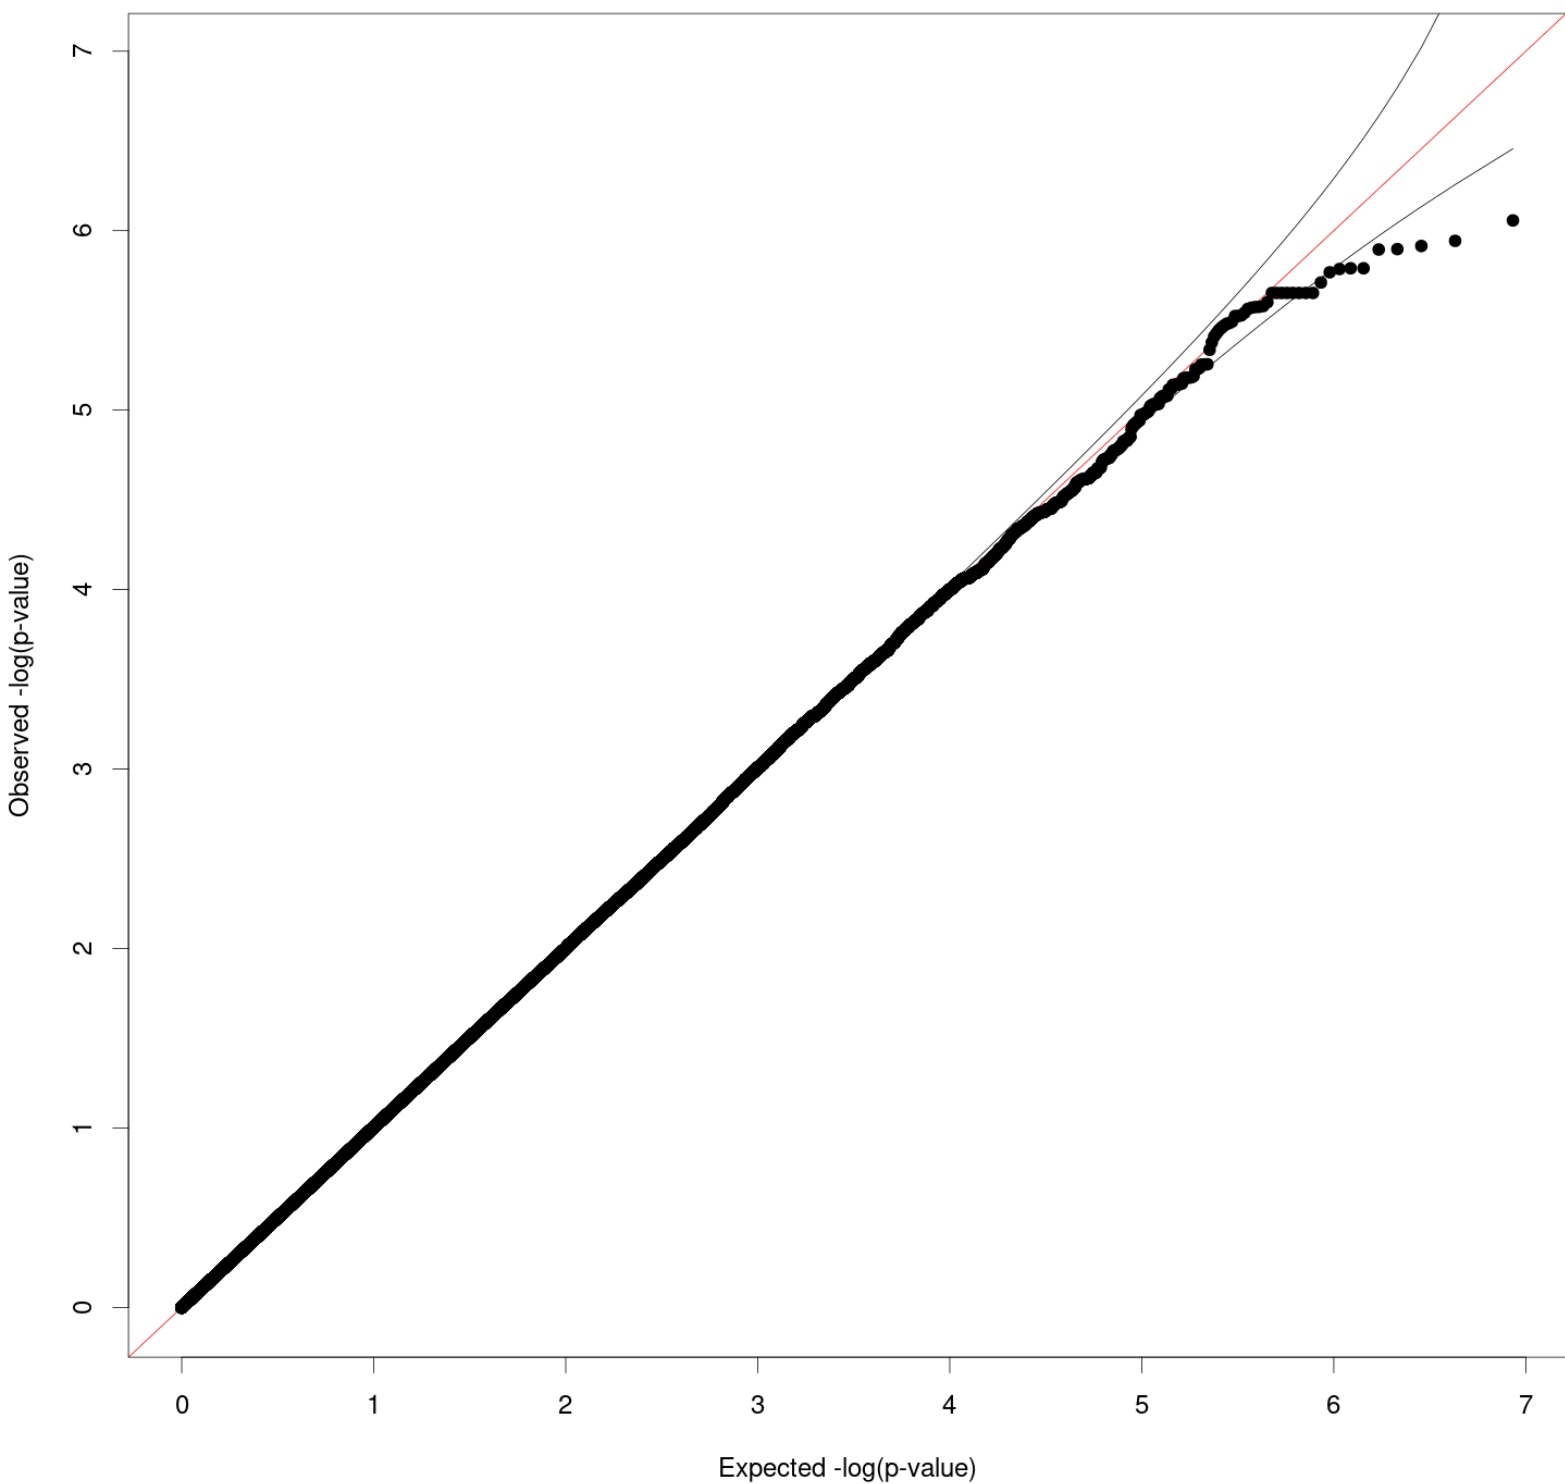

QQ plot for mz347.0405\_t30.1, inosine 5'-monophosphate  
inflation factor = 0.9998

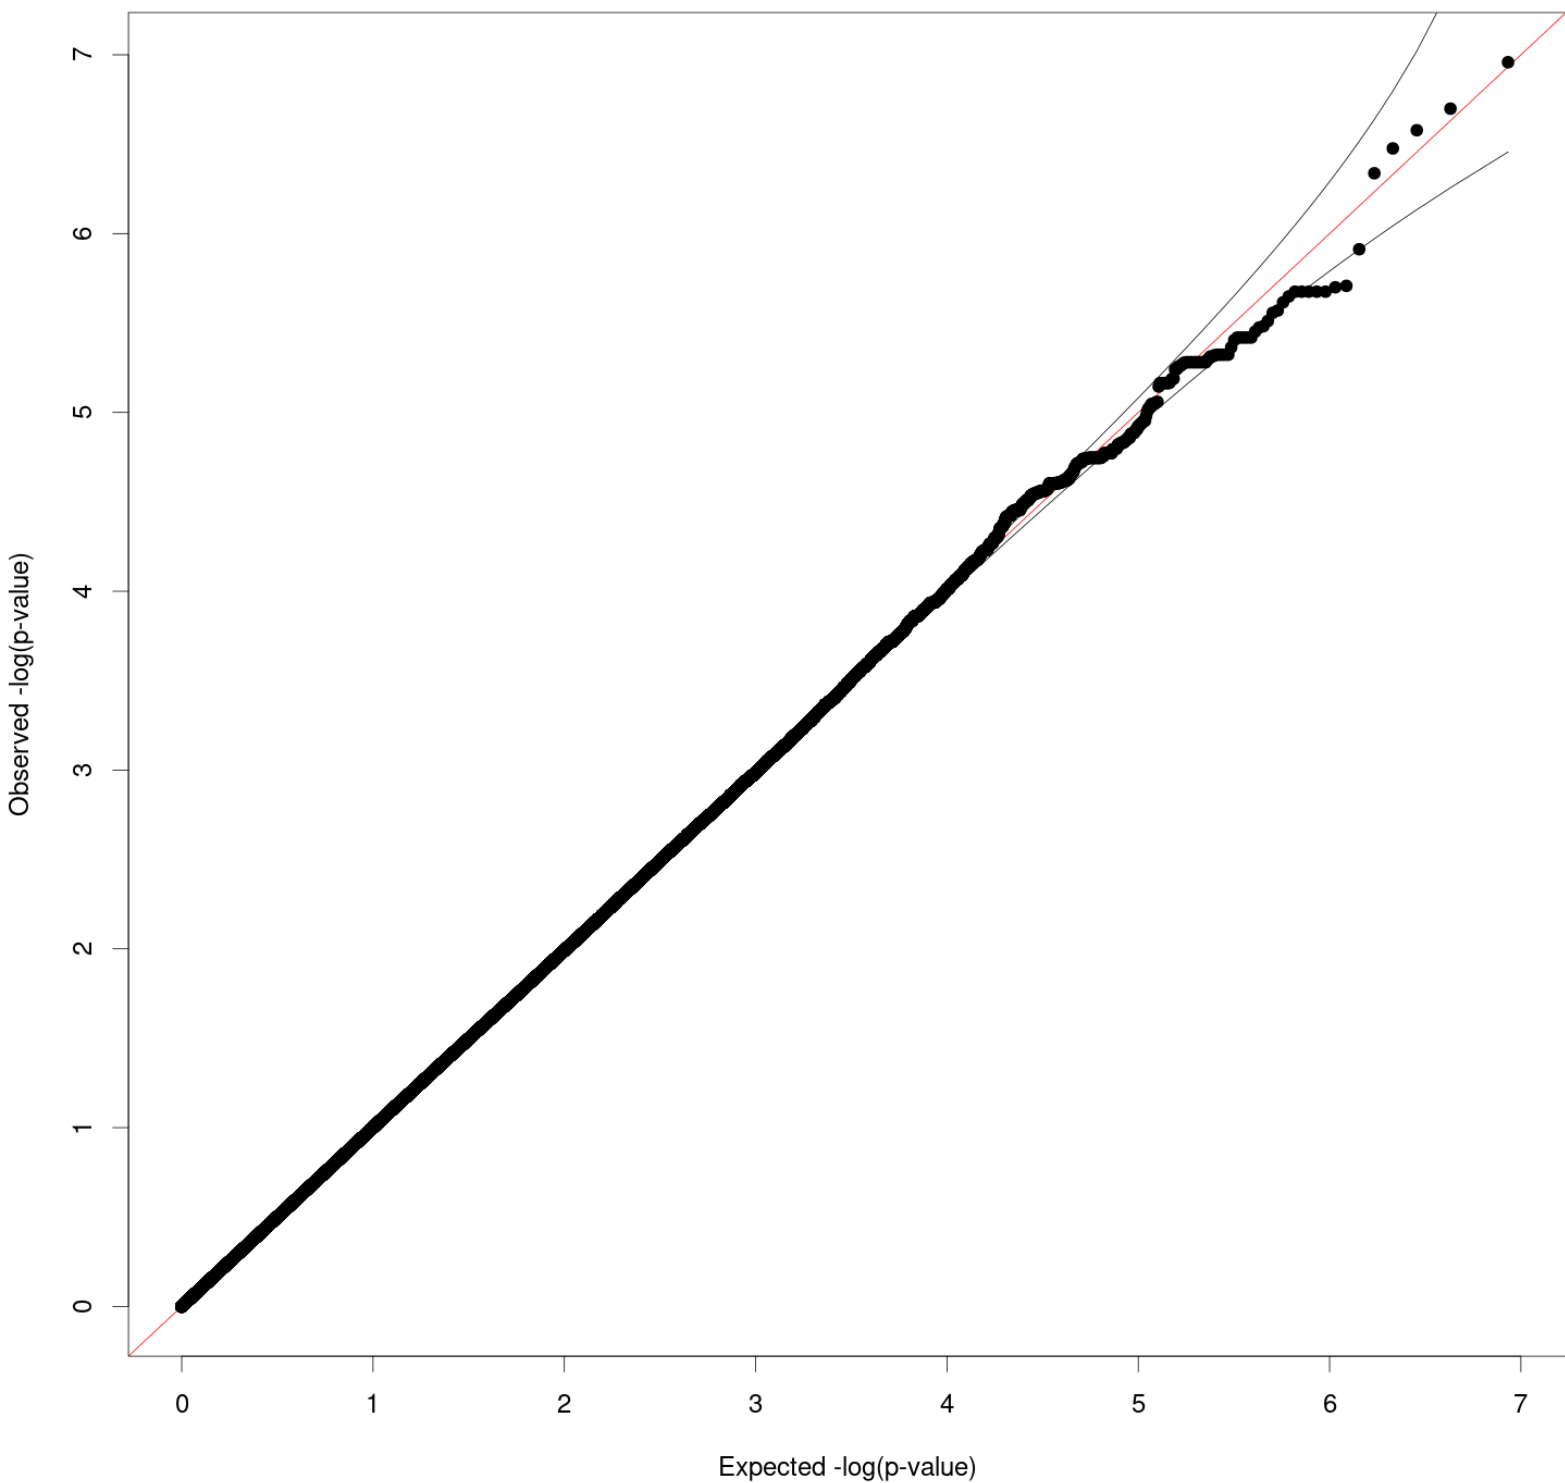

QQ plot for mz347.2221\_t21.9, reichstein?s substance s  
inflation factor = 1.001

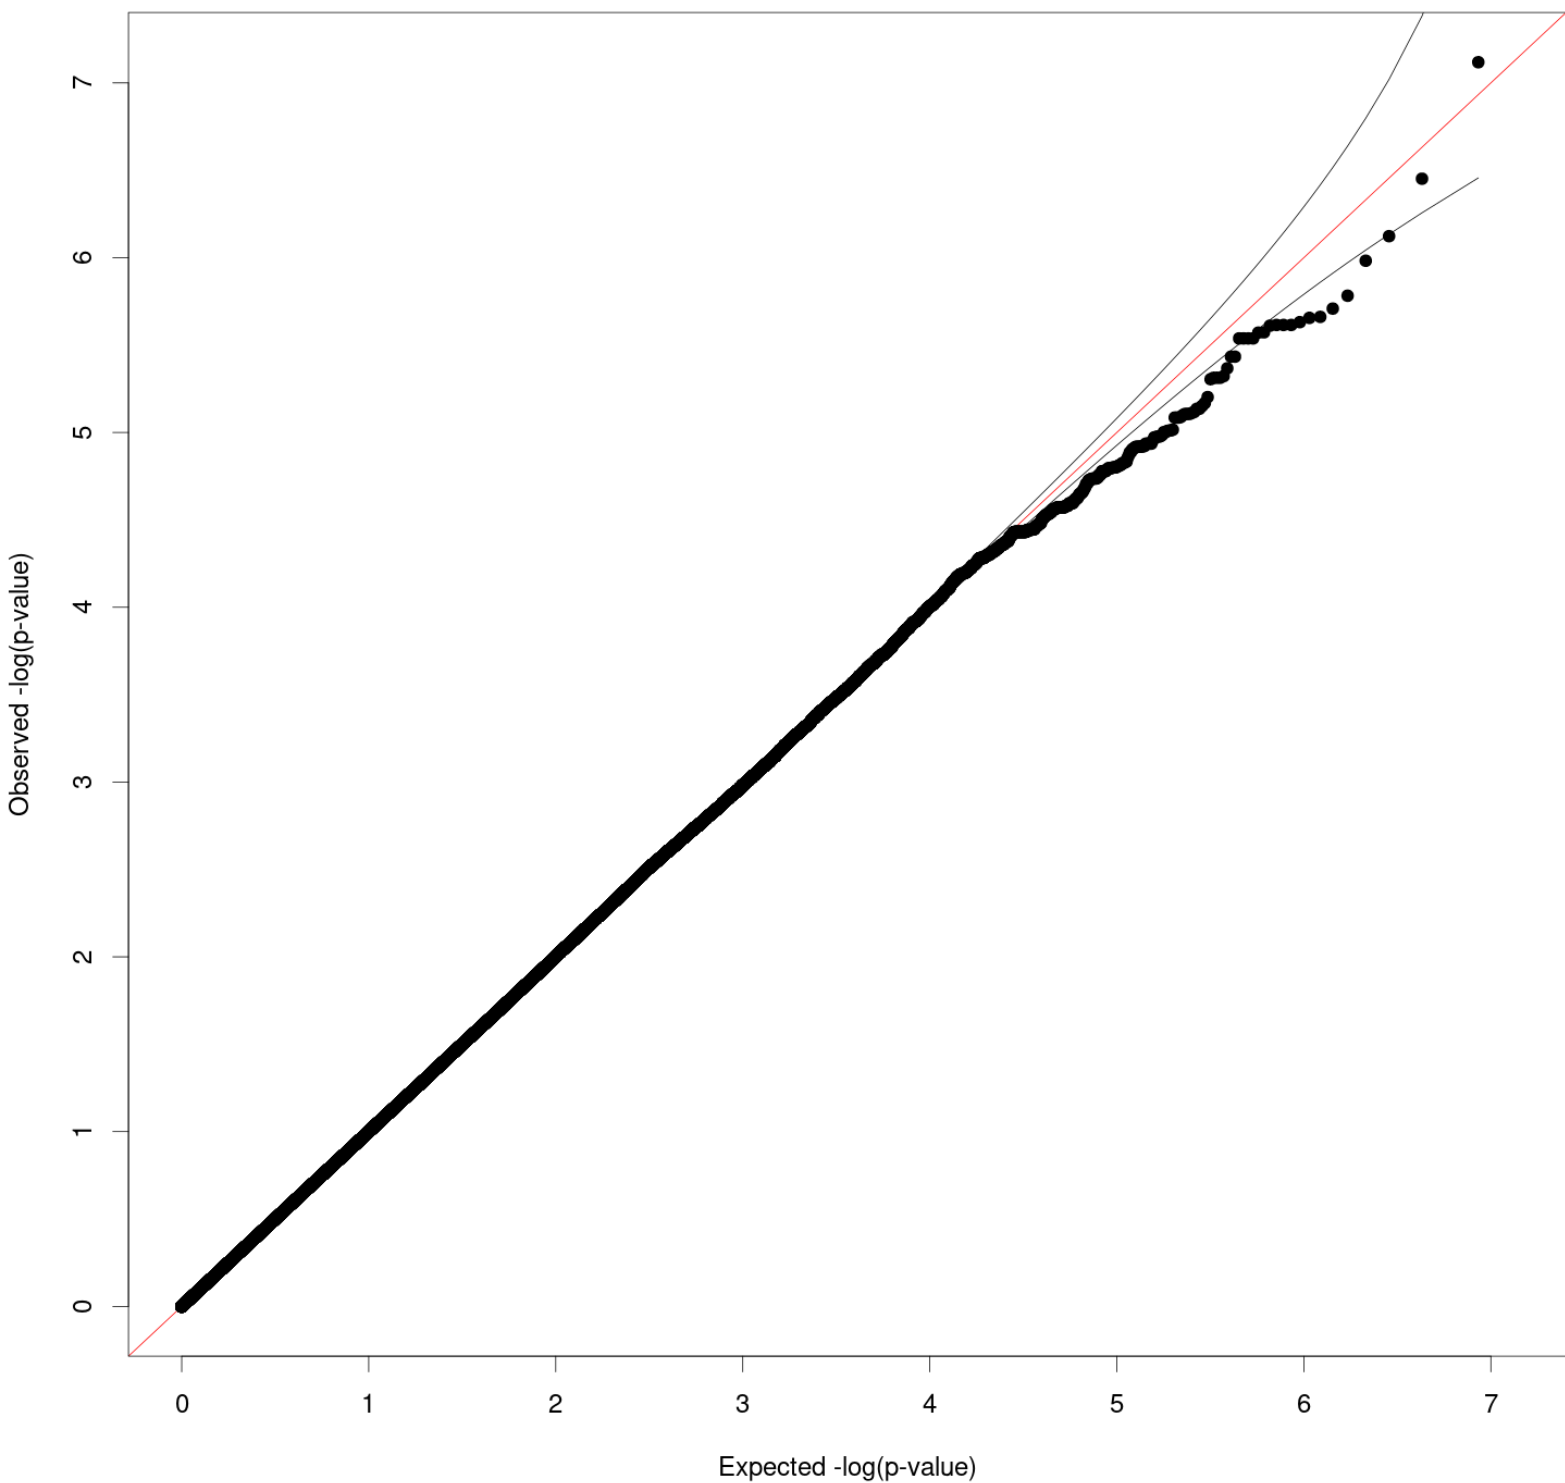

QQ plot for mz357.2999\_t24, 1-oleoyl-rac-glycerol  
inflation factor = 0.9917

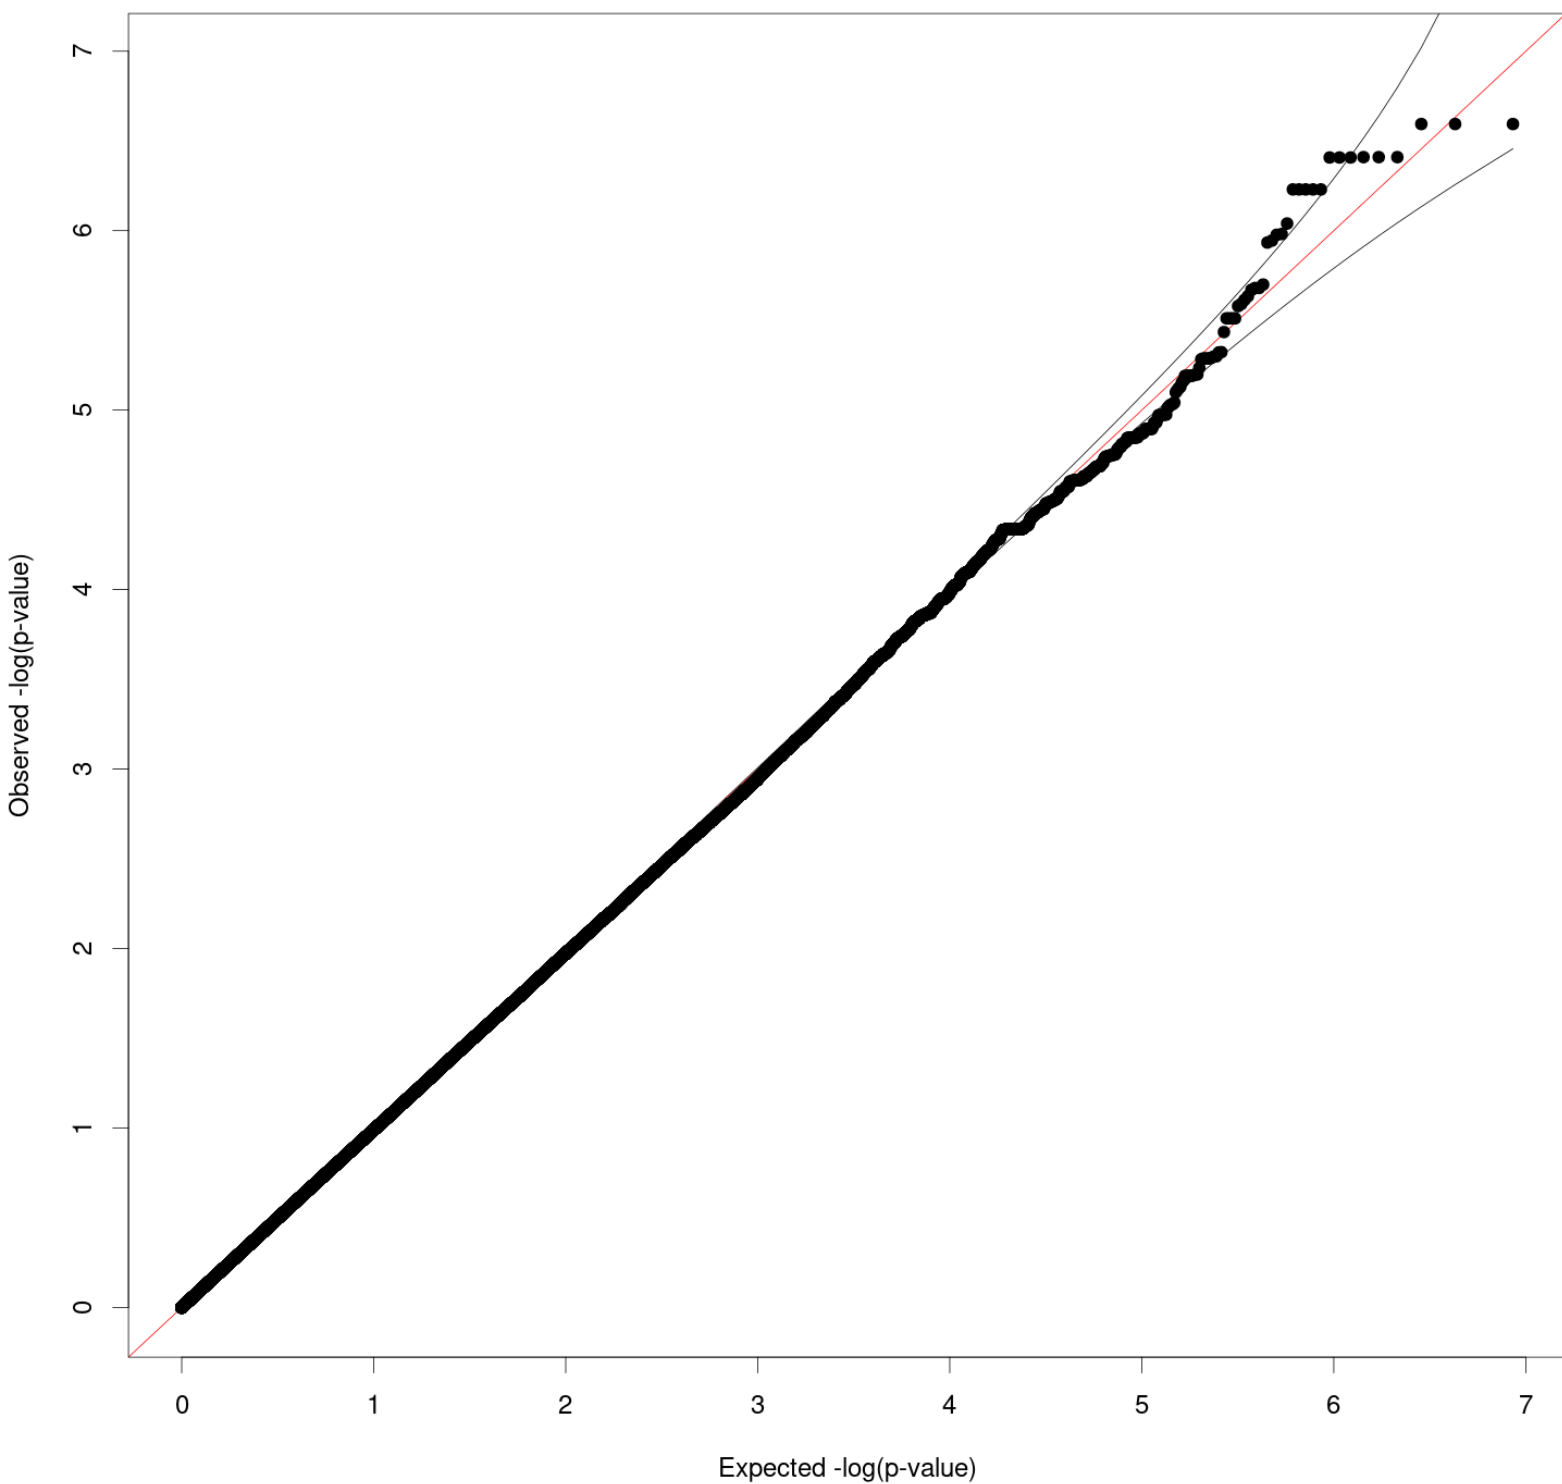

QQ plot for mz362.052\_t33, guanosine 5'-monophosphate  
inflation factor = 0.9973

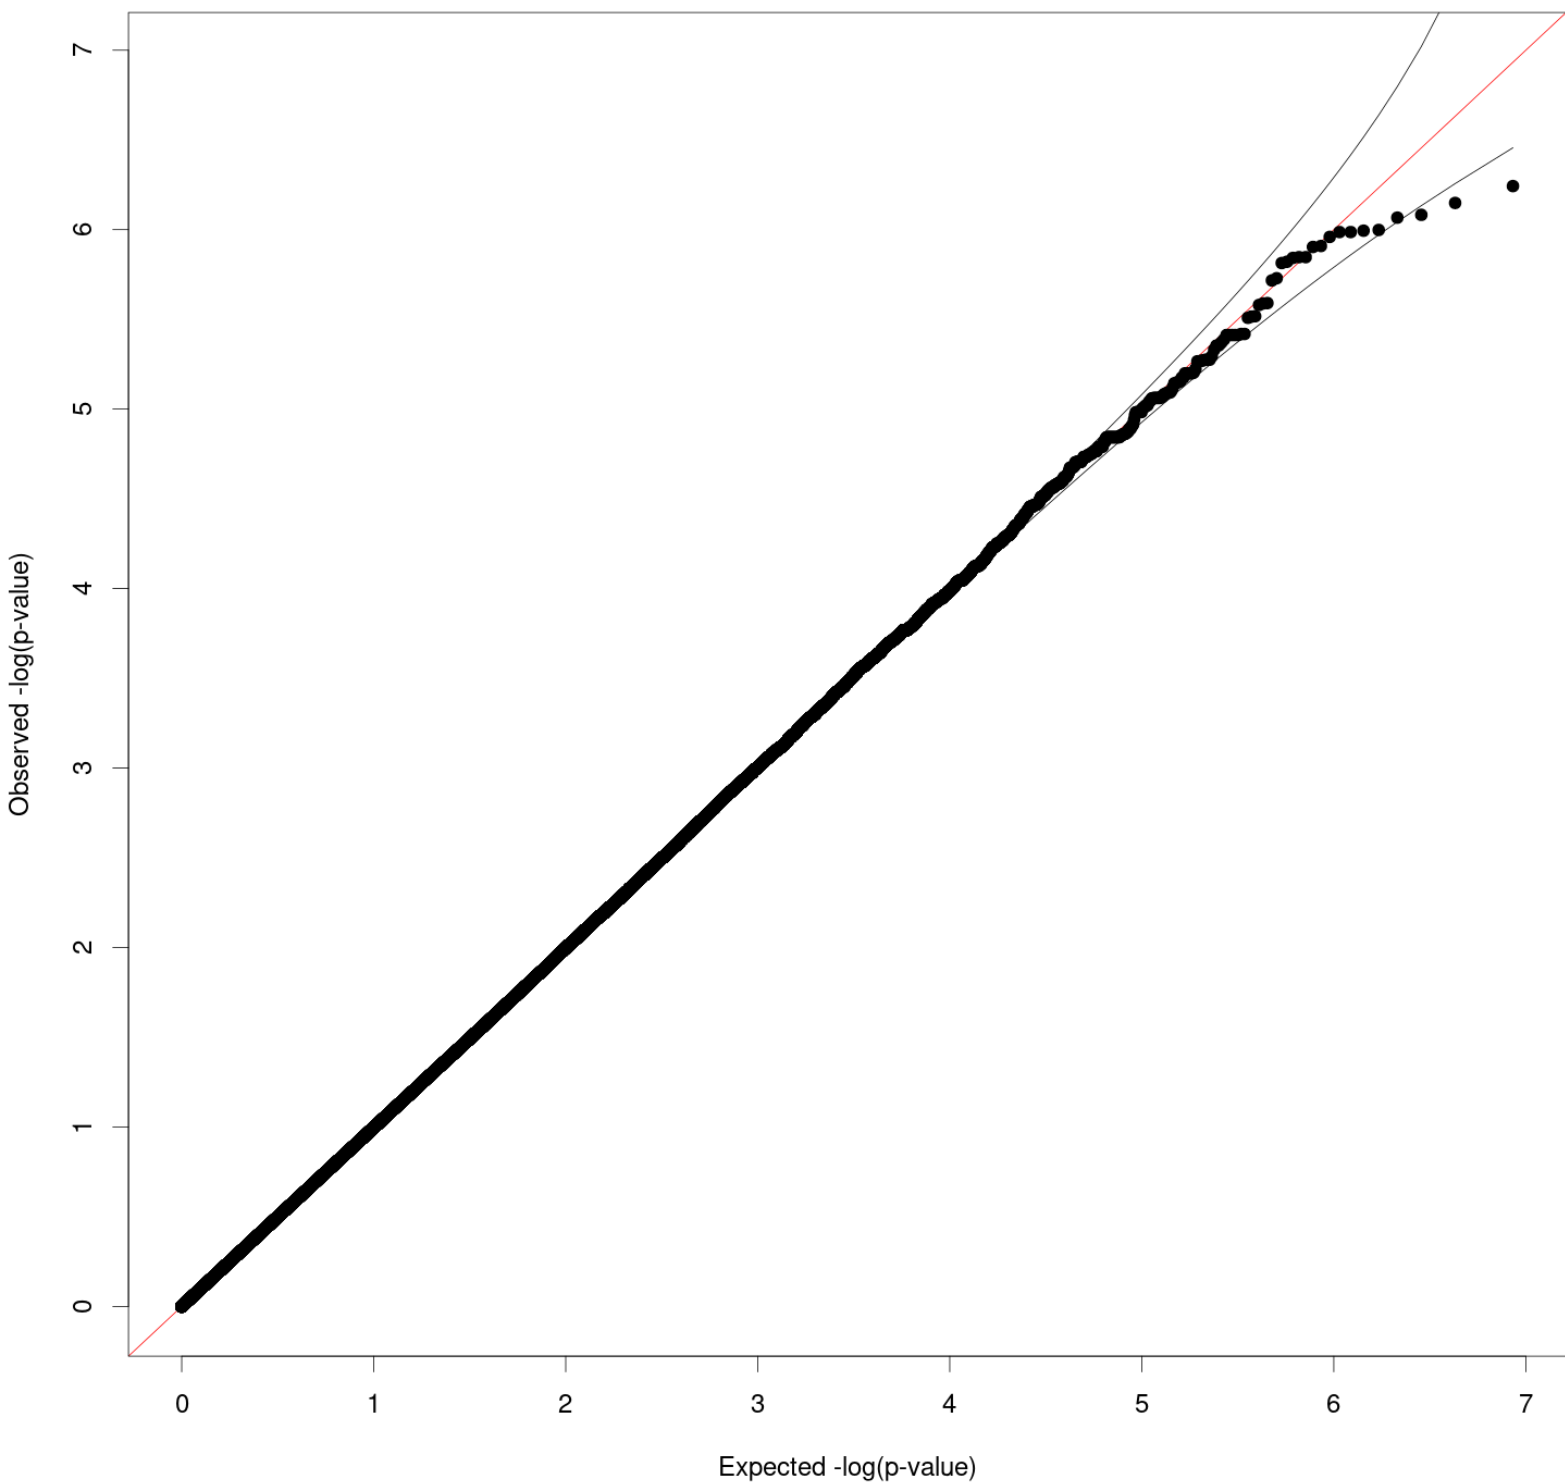

QQ plot for mz363.2163\_t27.2, cortisol  
inflation factor = 1.014

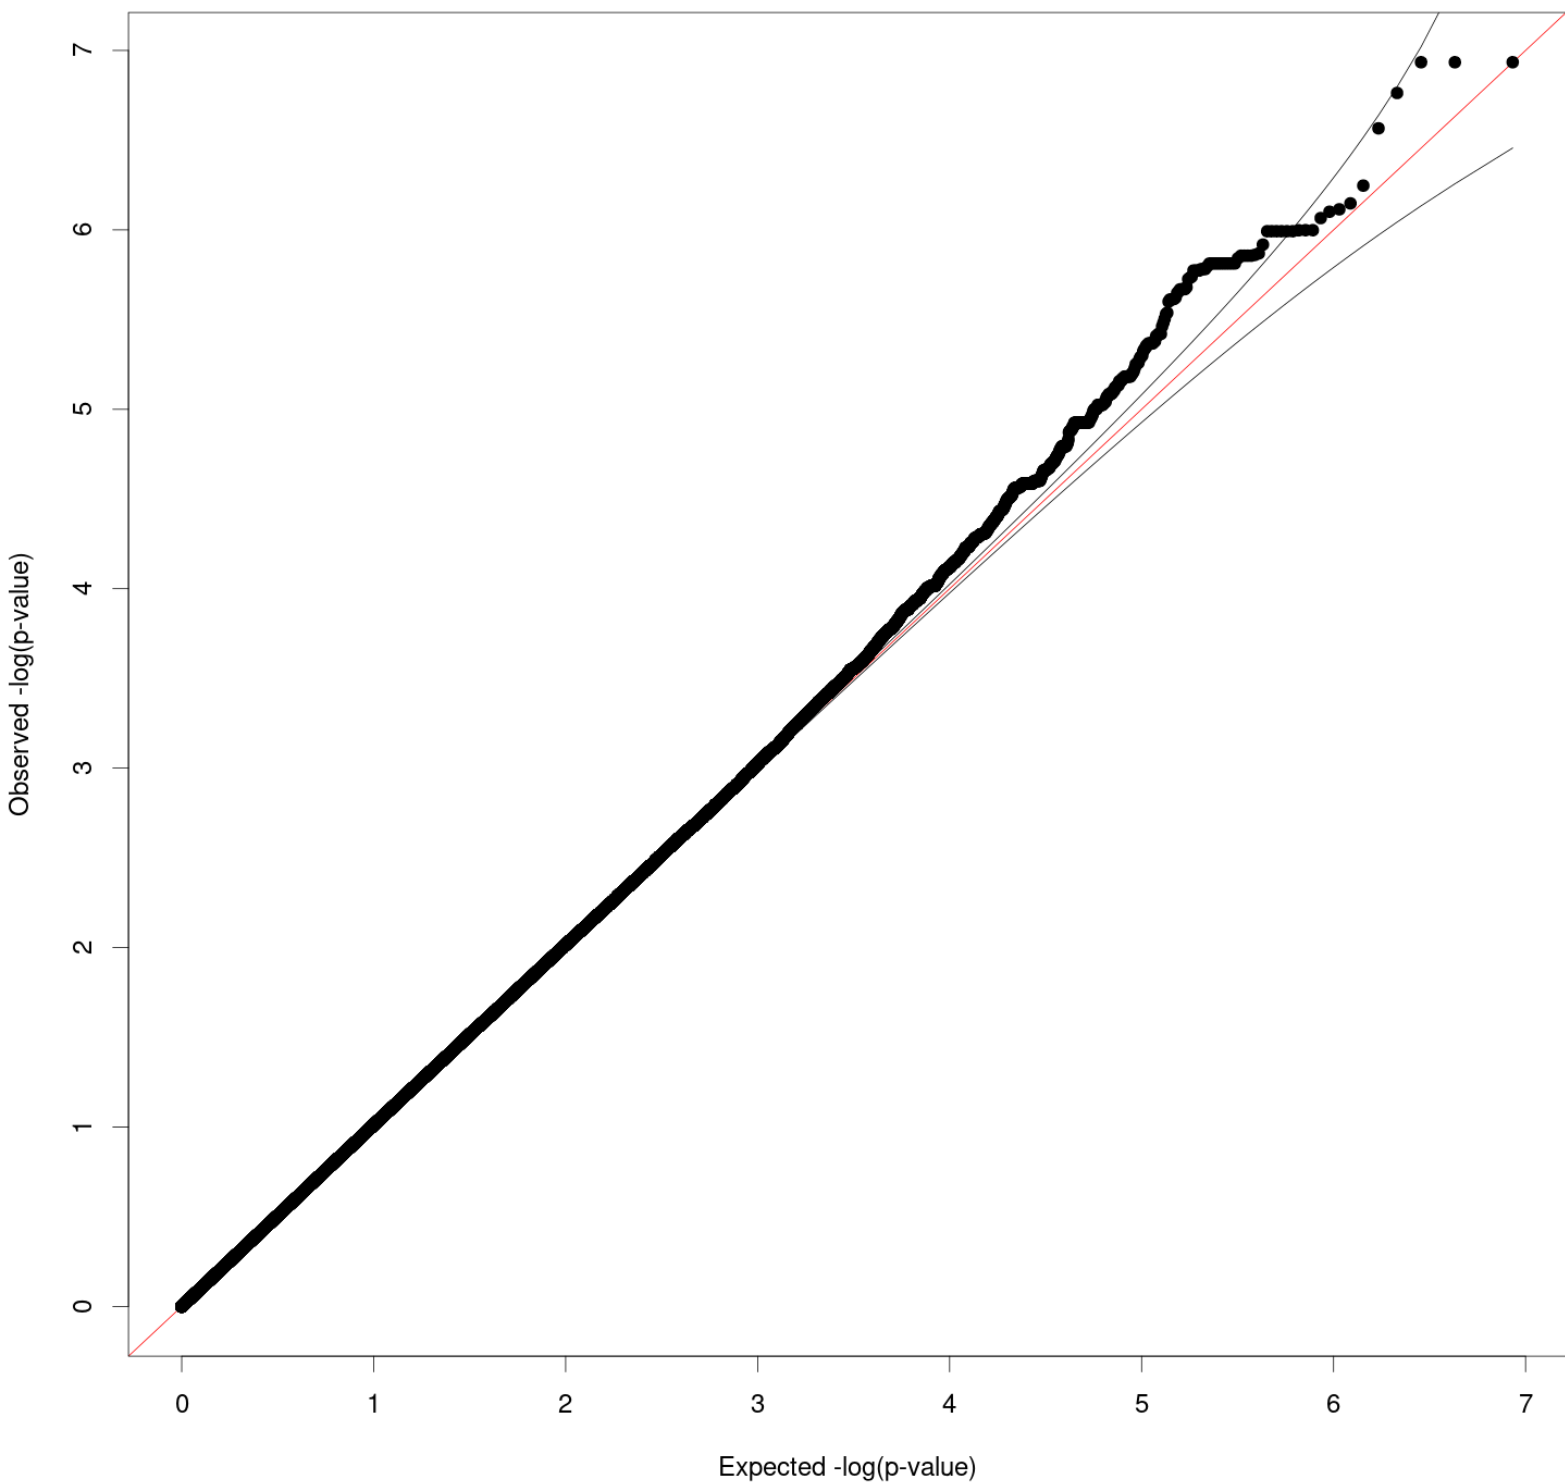

QQ plot for mz373.2371\_t19.8, deoxycorticosterone acetate  
inflation factor = 1.001

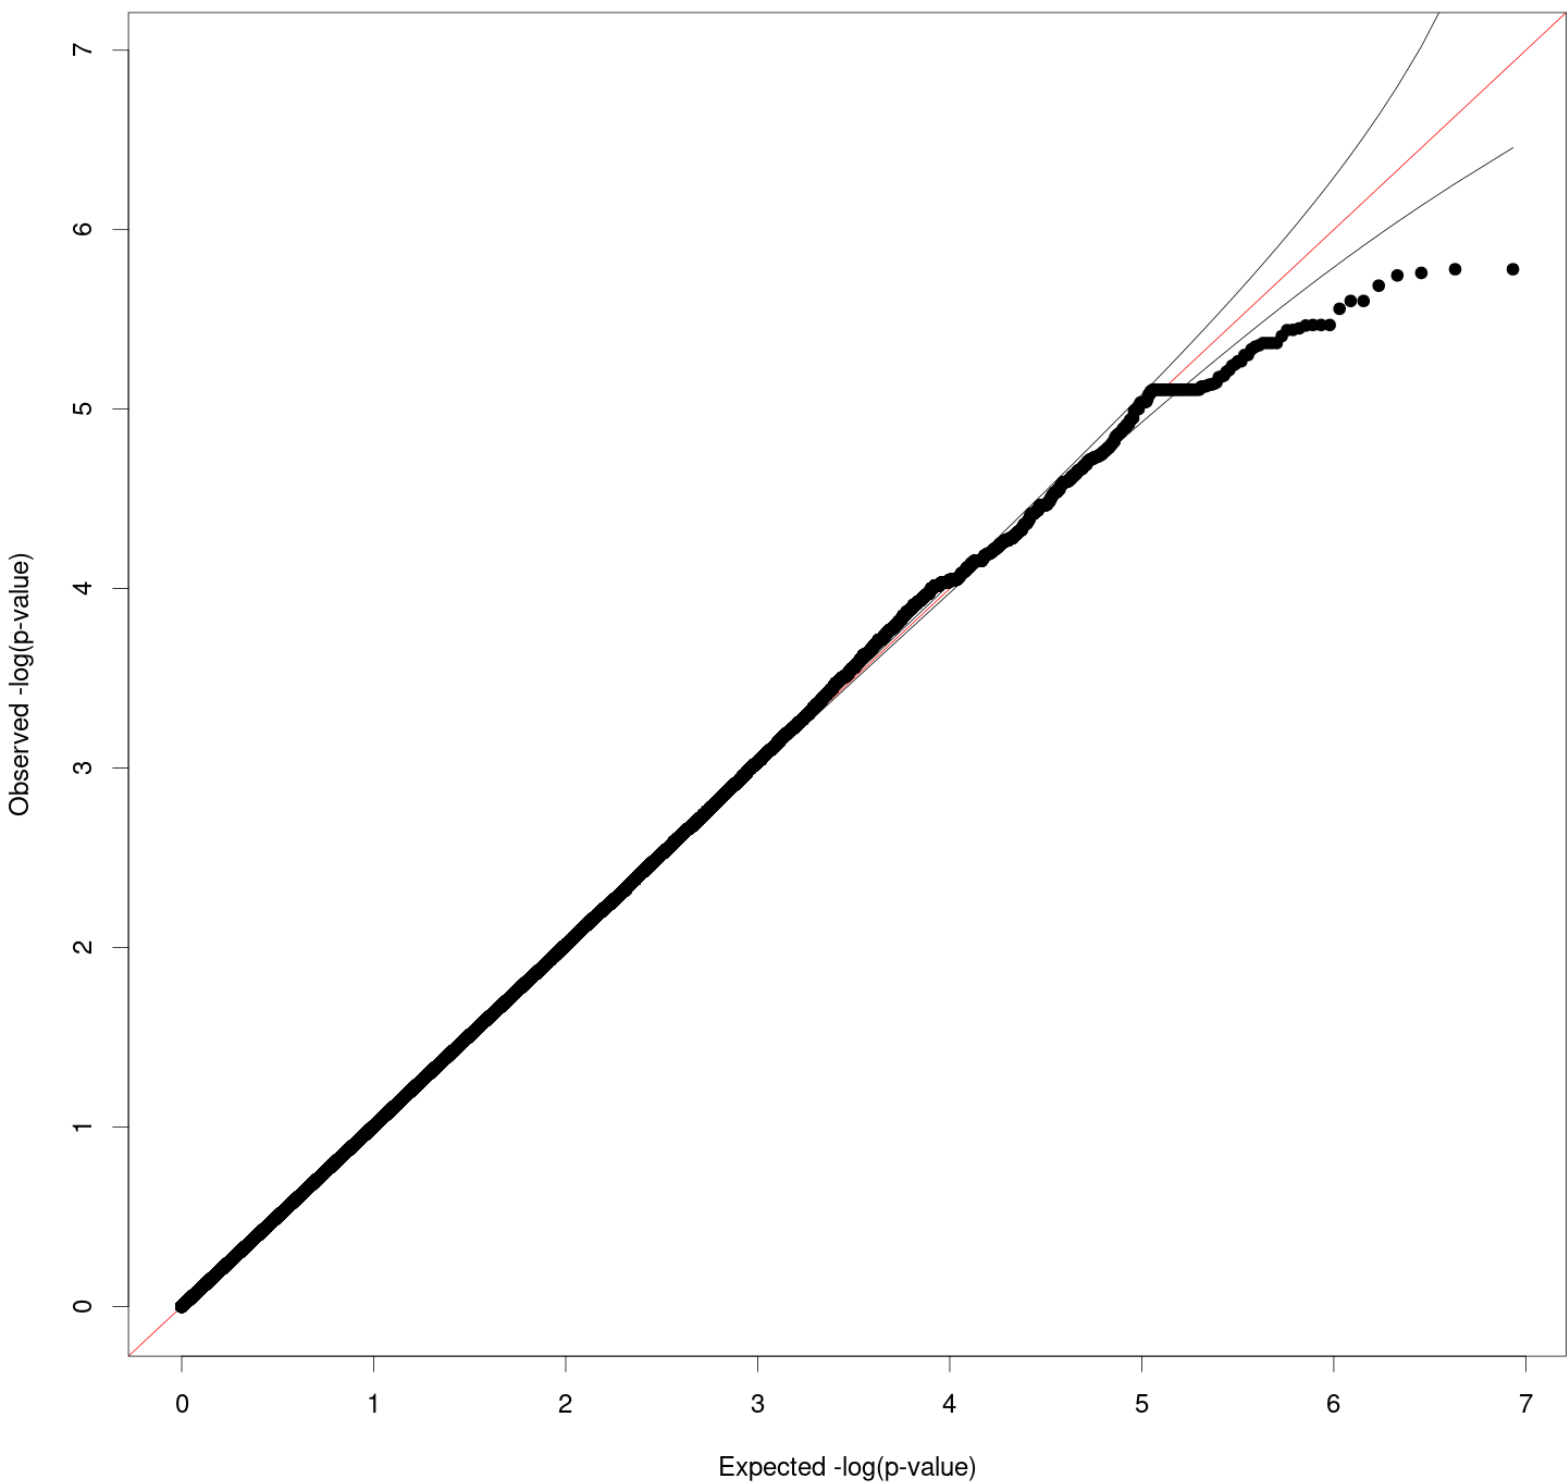

QQ plot for mz375.2926\_t209.2, 3alpha-hydroxy-5beta-cholanate  
inflation factor = 0.9984

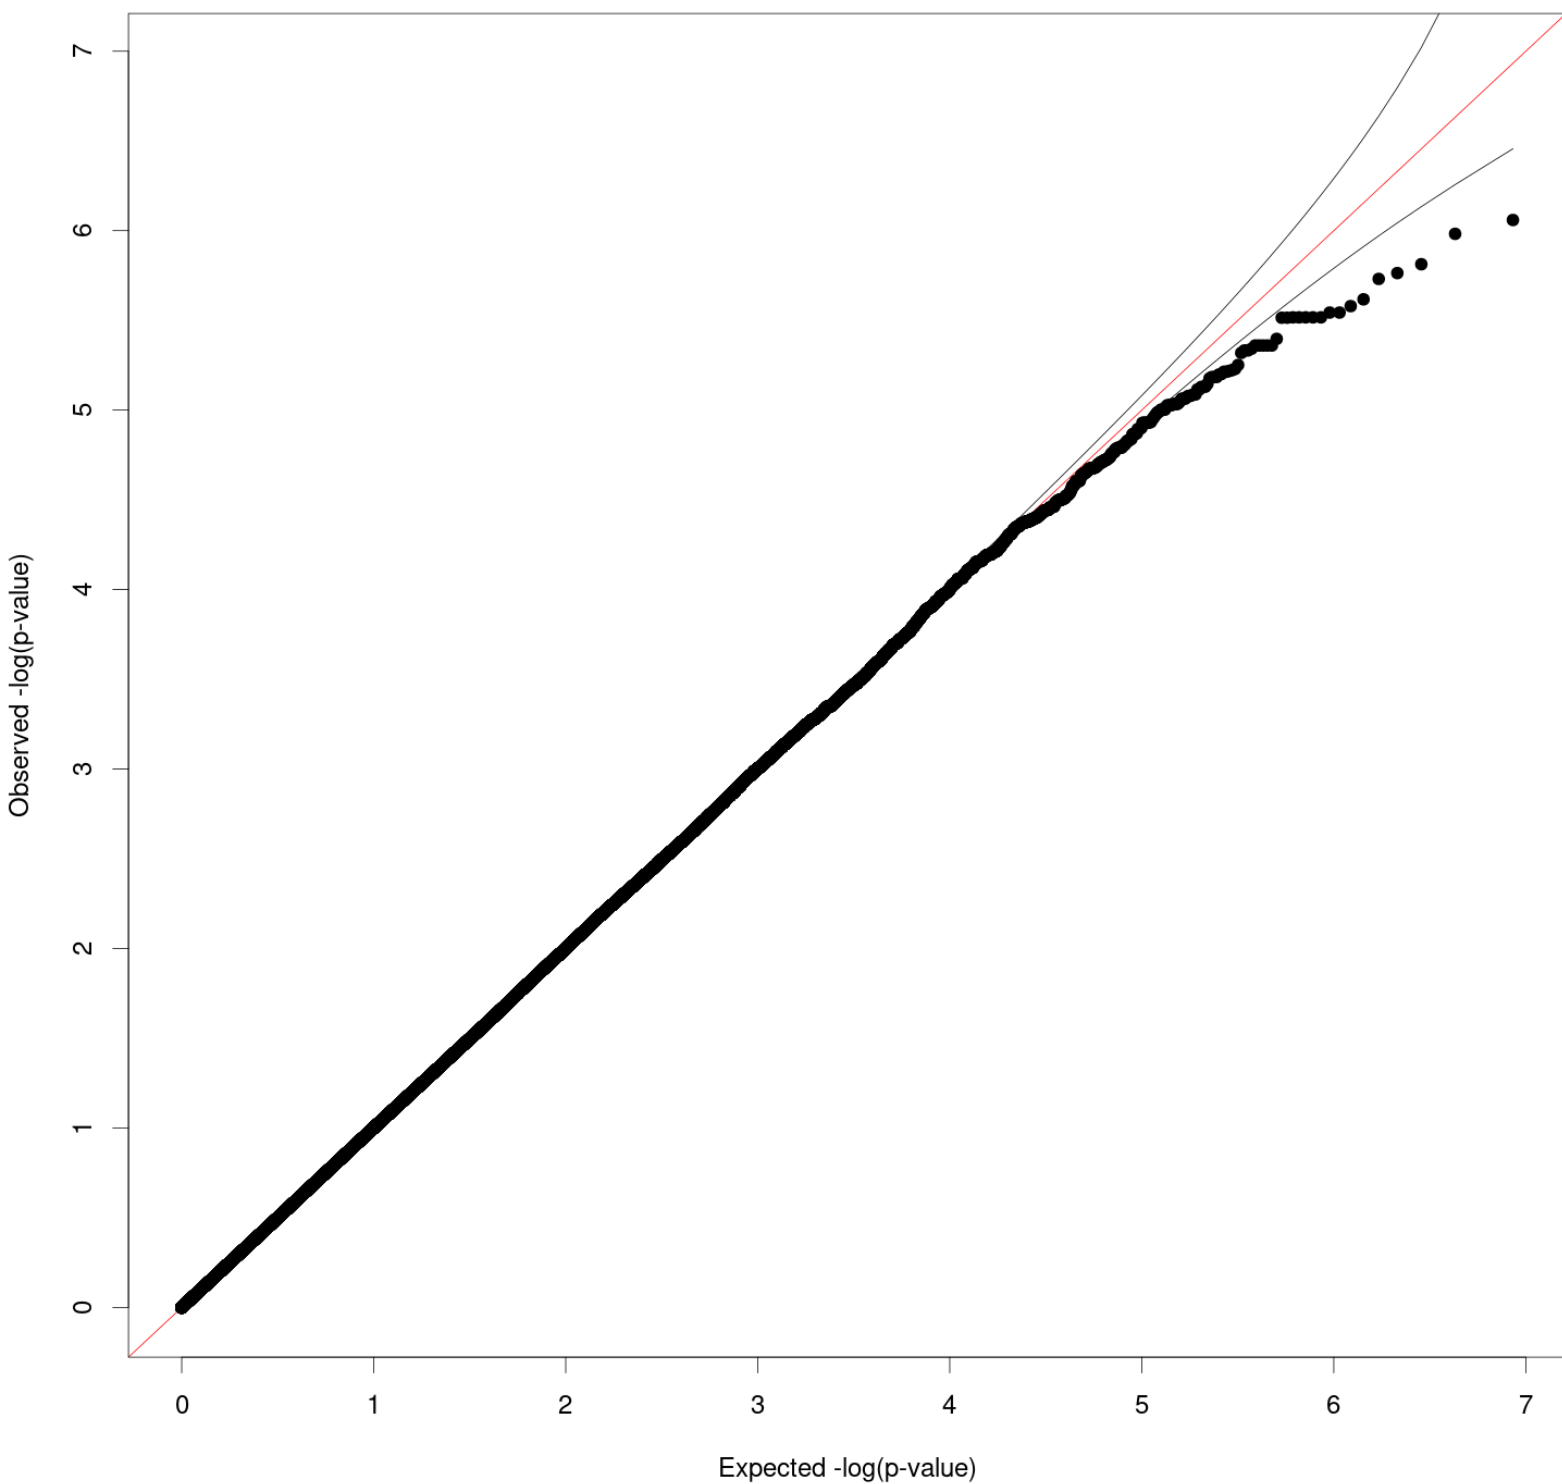



QQ plot for mz377.1455\_t37.9, riboflavin  
inflation factor = 0.9924

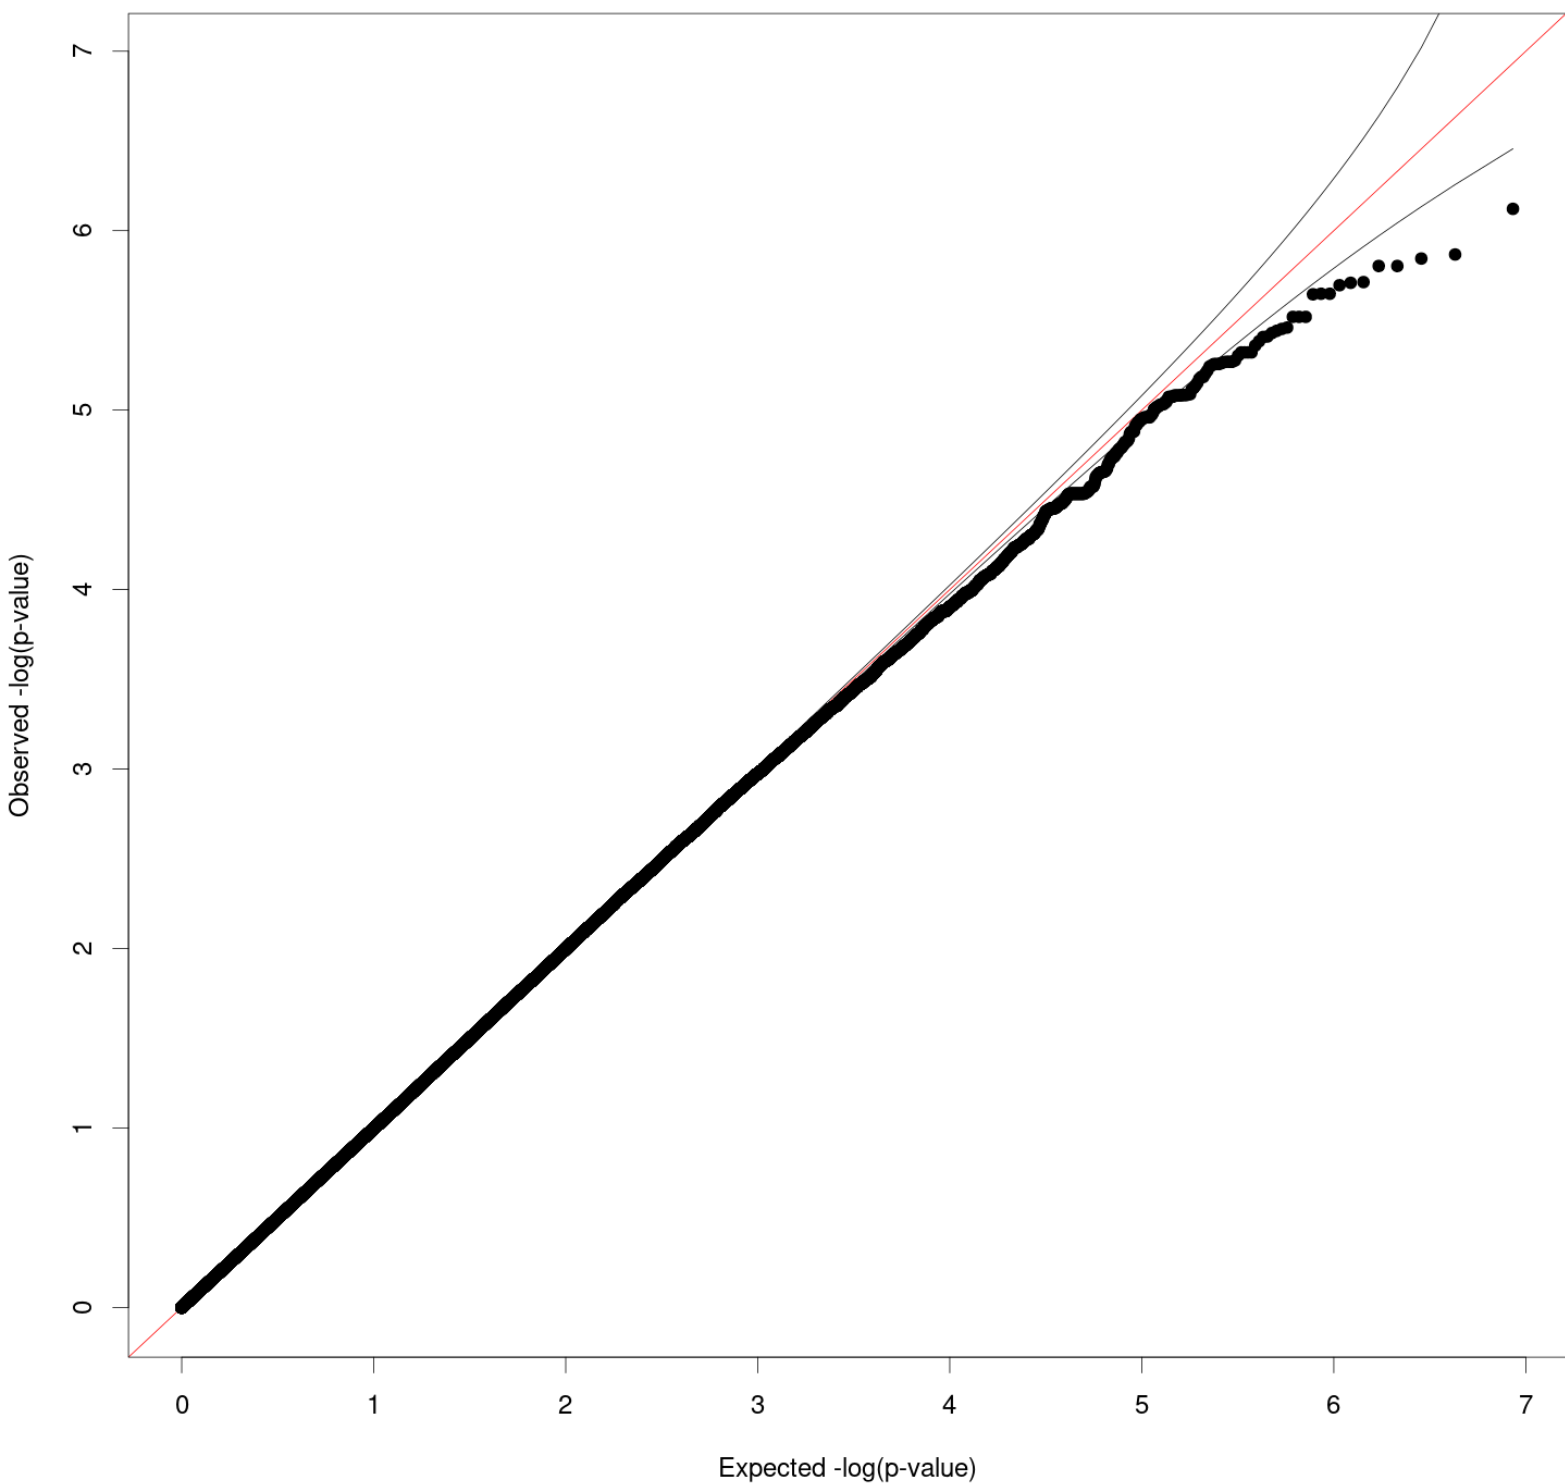

QQ plot for mz403.3574\_t23.7, 25-hydroxycholesterol  
inflation factor = 0.9872

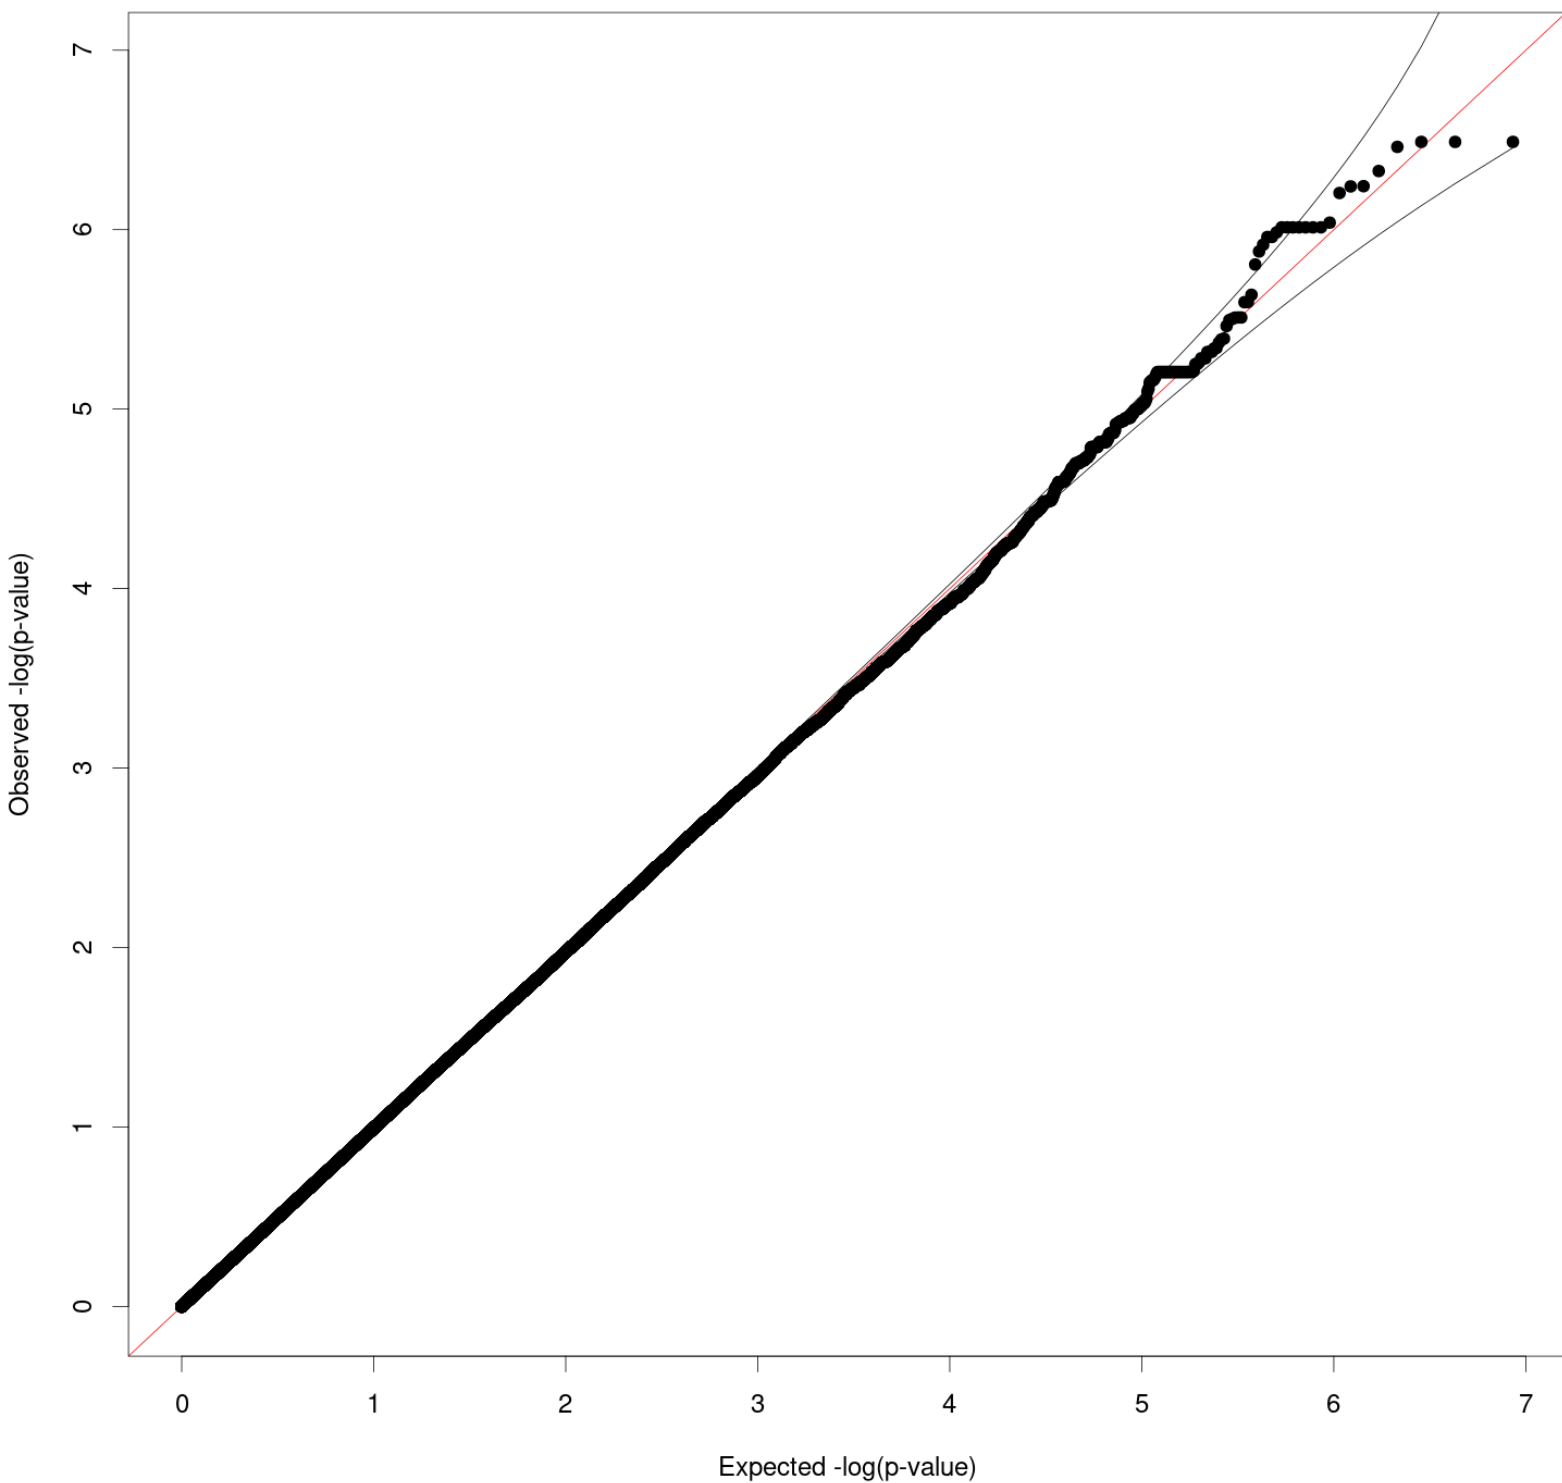

QQ plot for mz409.2936\_t20.8, cholate  
inflation factor = 0.9944

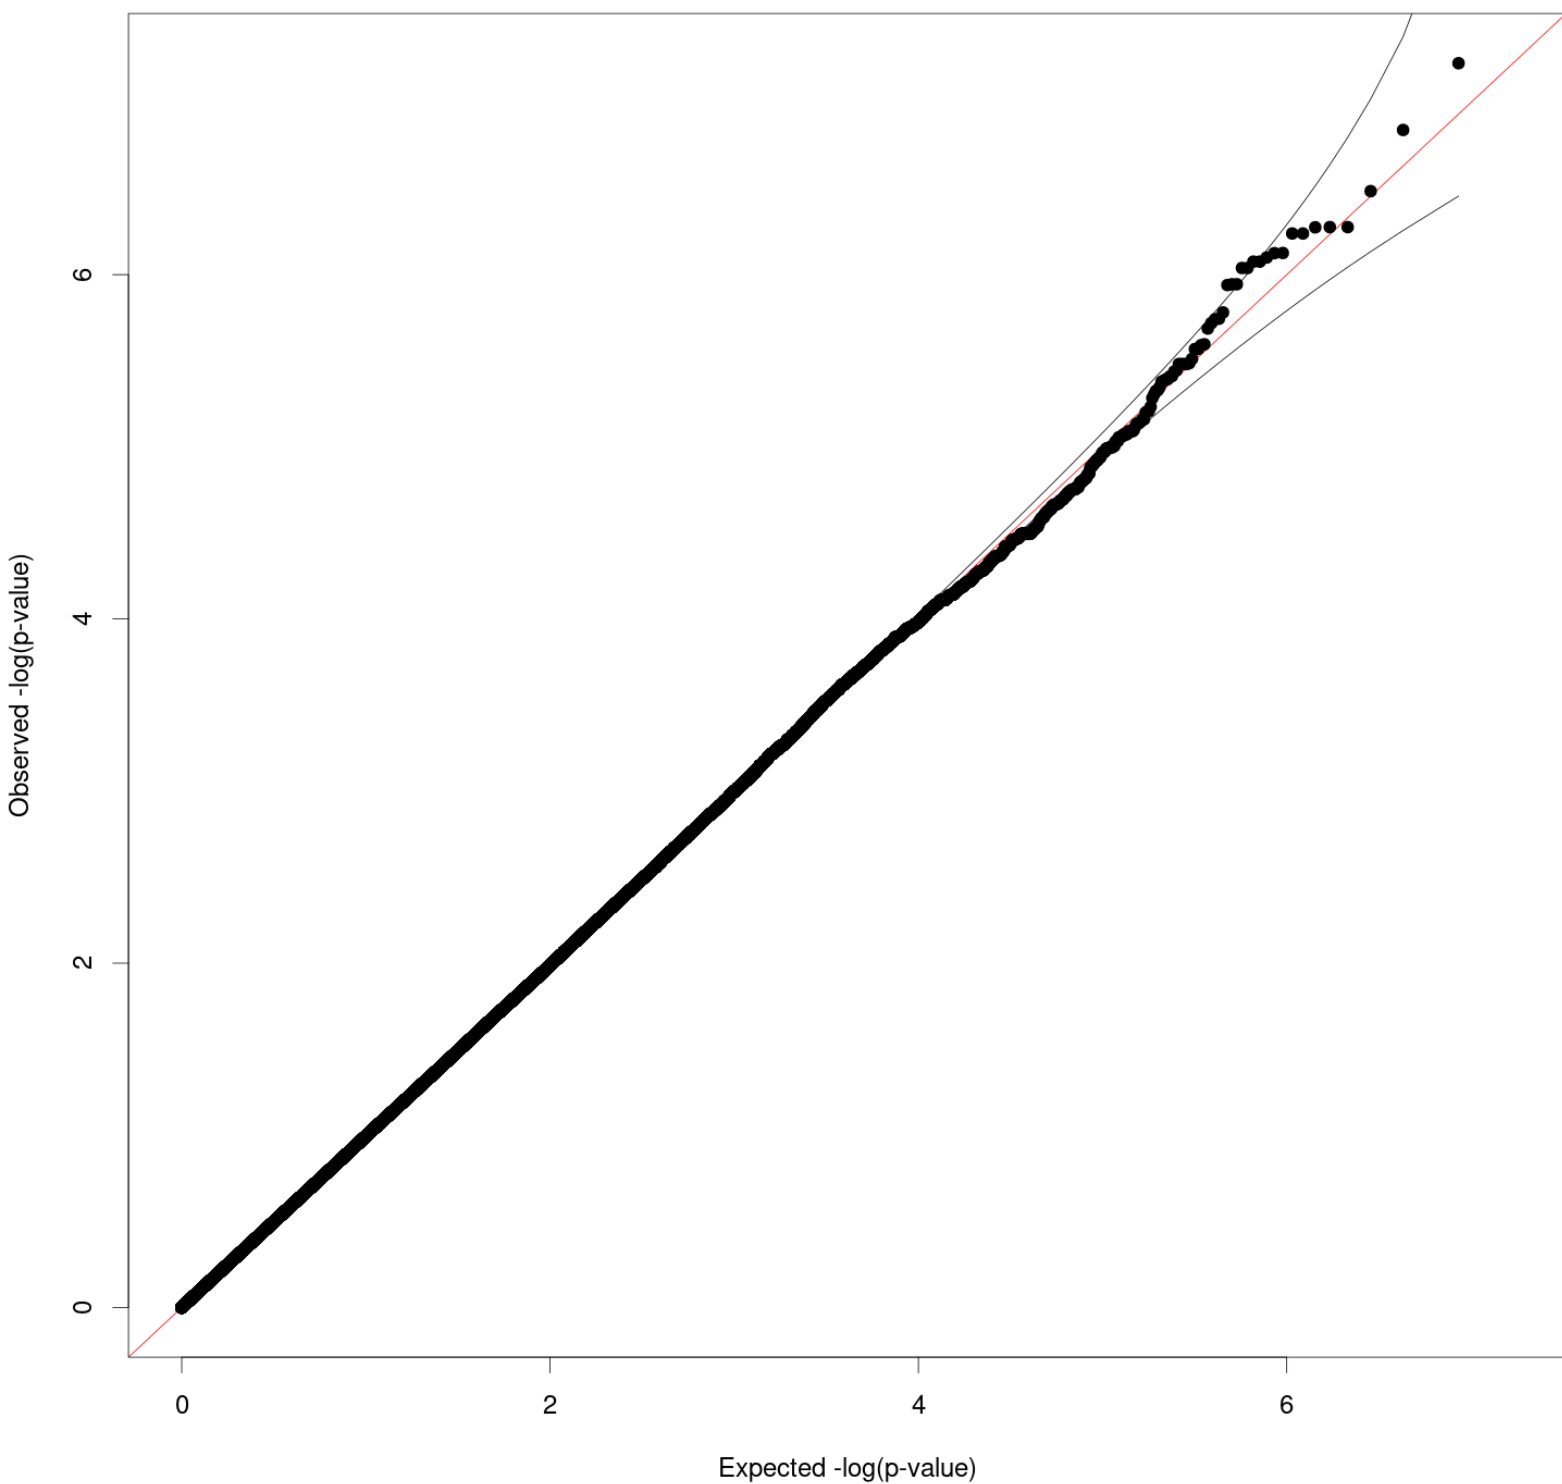

QQ plot for mz583.2537\_t25.4, biliverdin  
inflation factor = 0.9938

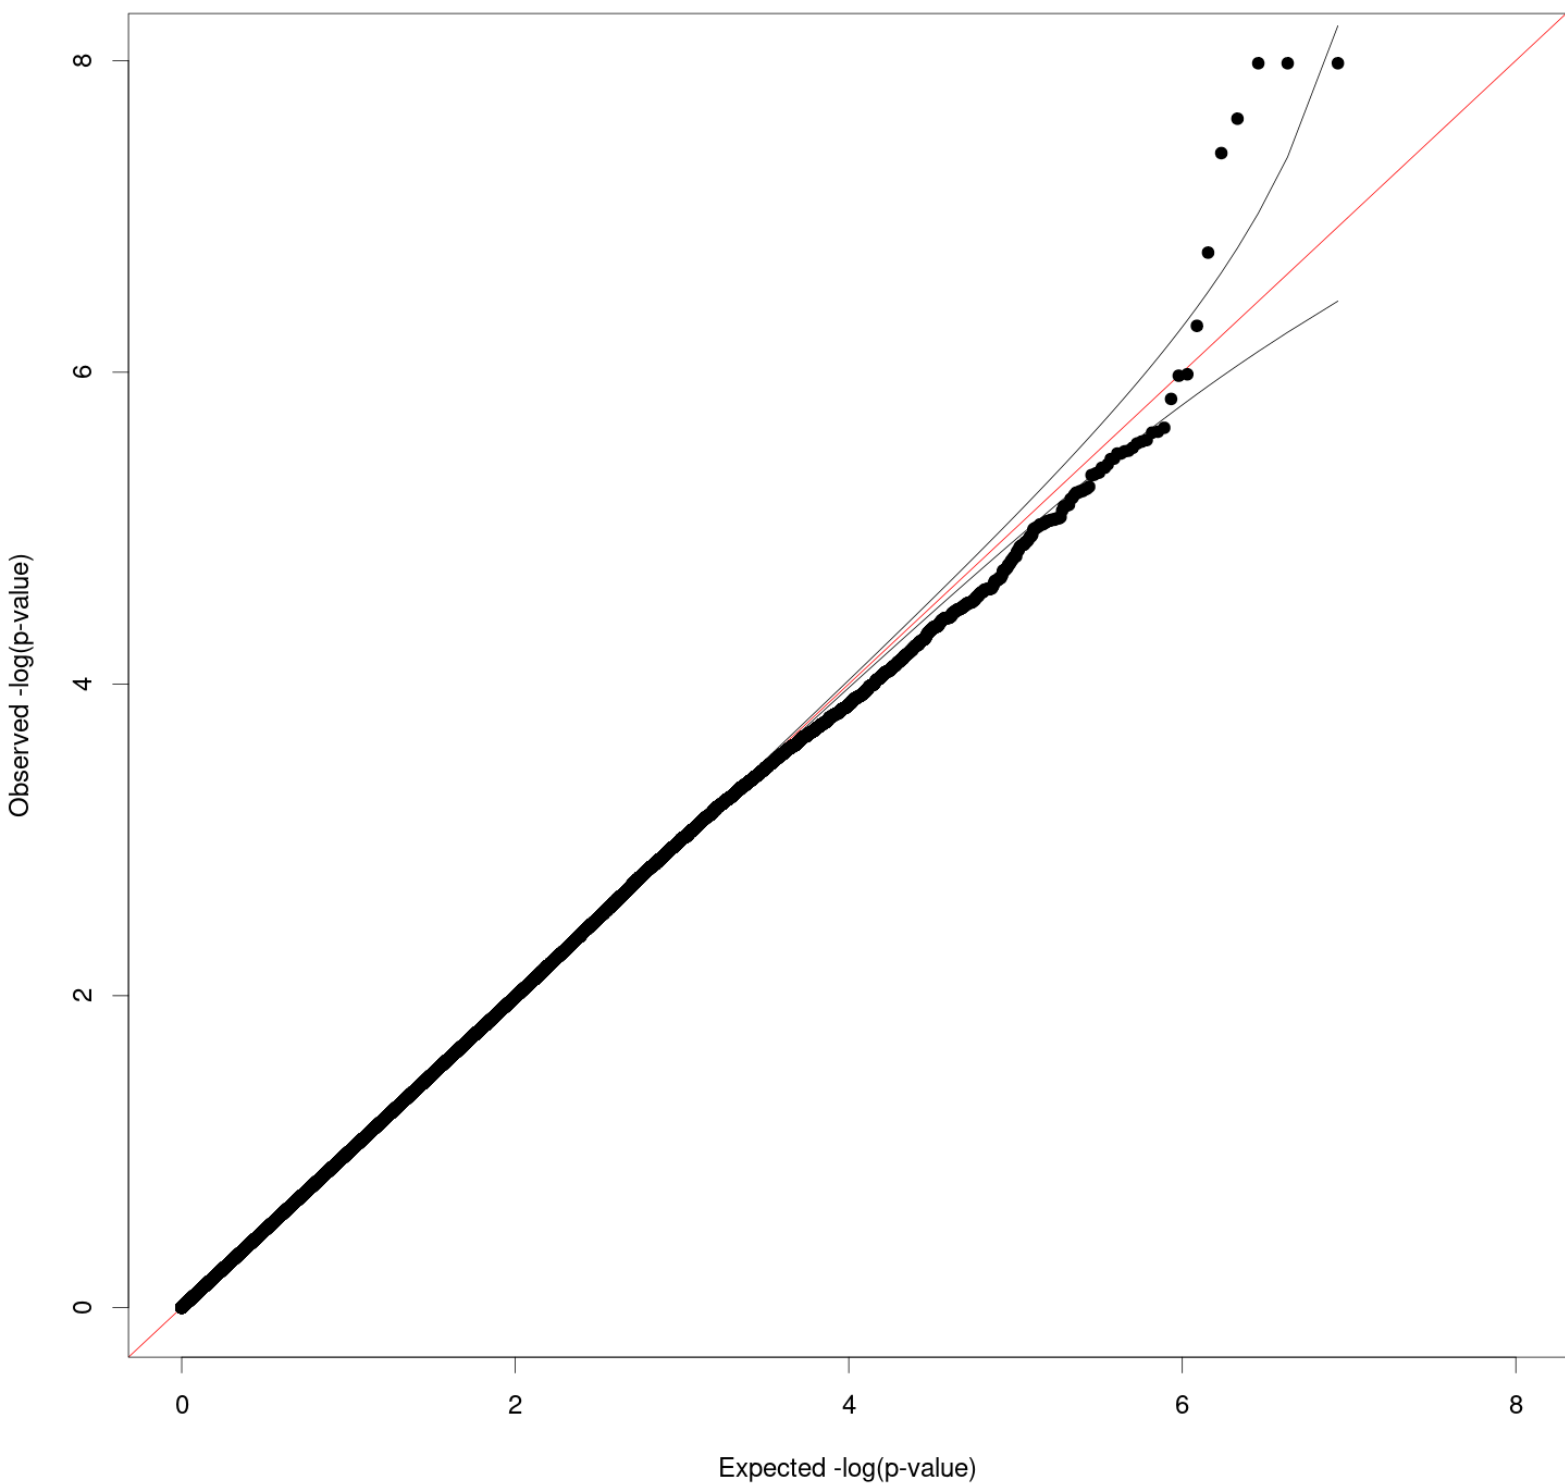

QQ plot for mz585.2707\_t23.2, bilirubin  
inflation factor = 0.9945

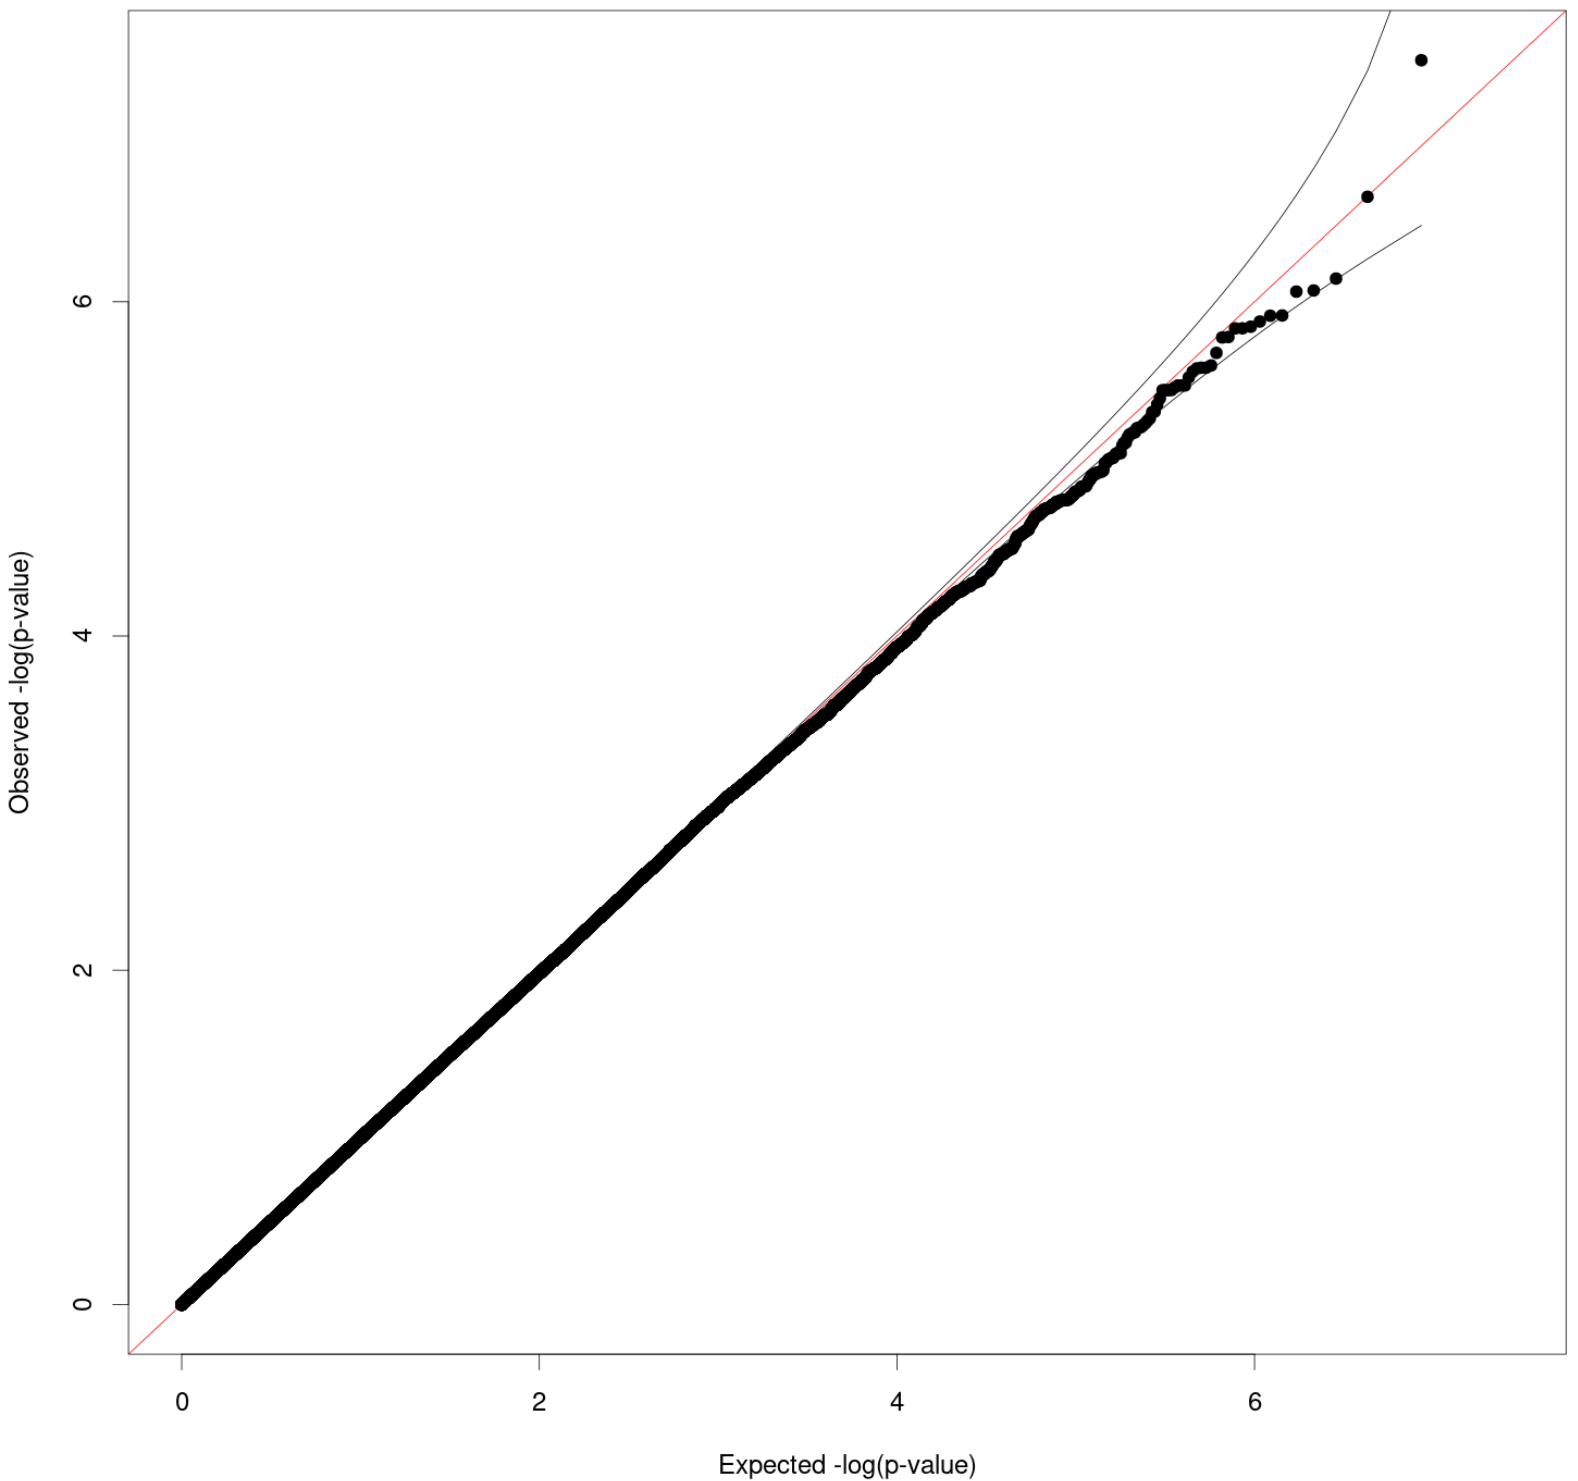

QQ plot for mz777.6935\_t33.9, thyroxine  
inflation factor = 0.996

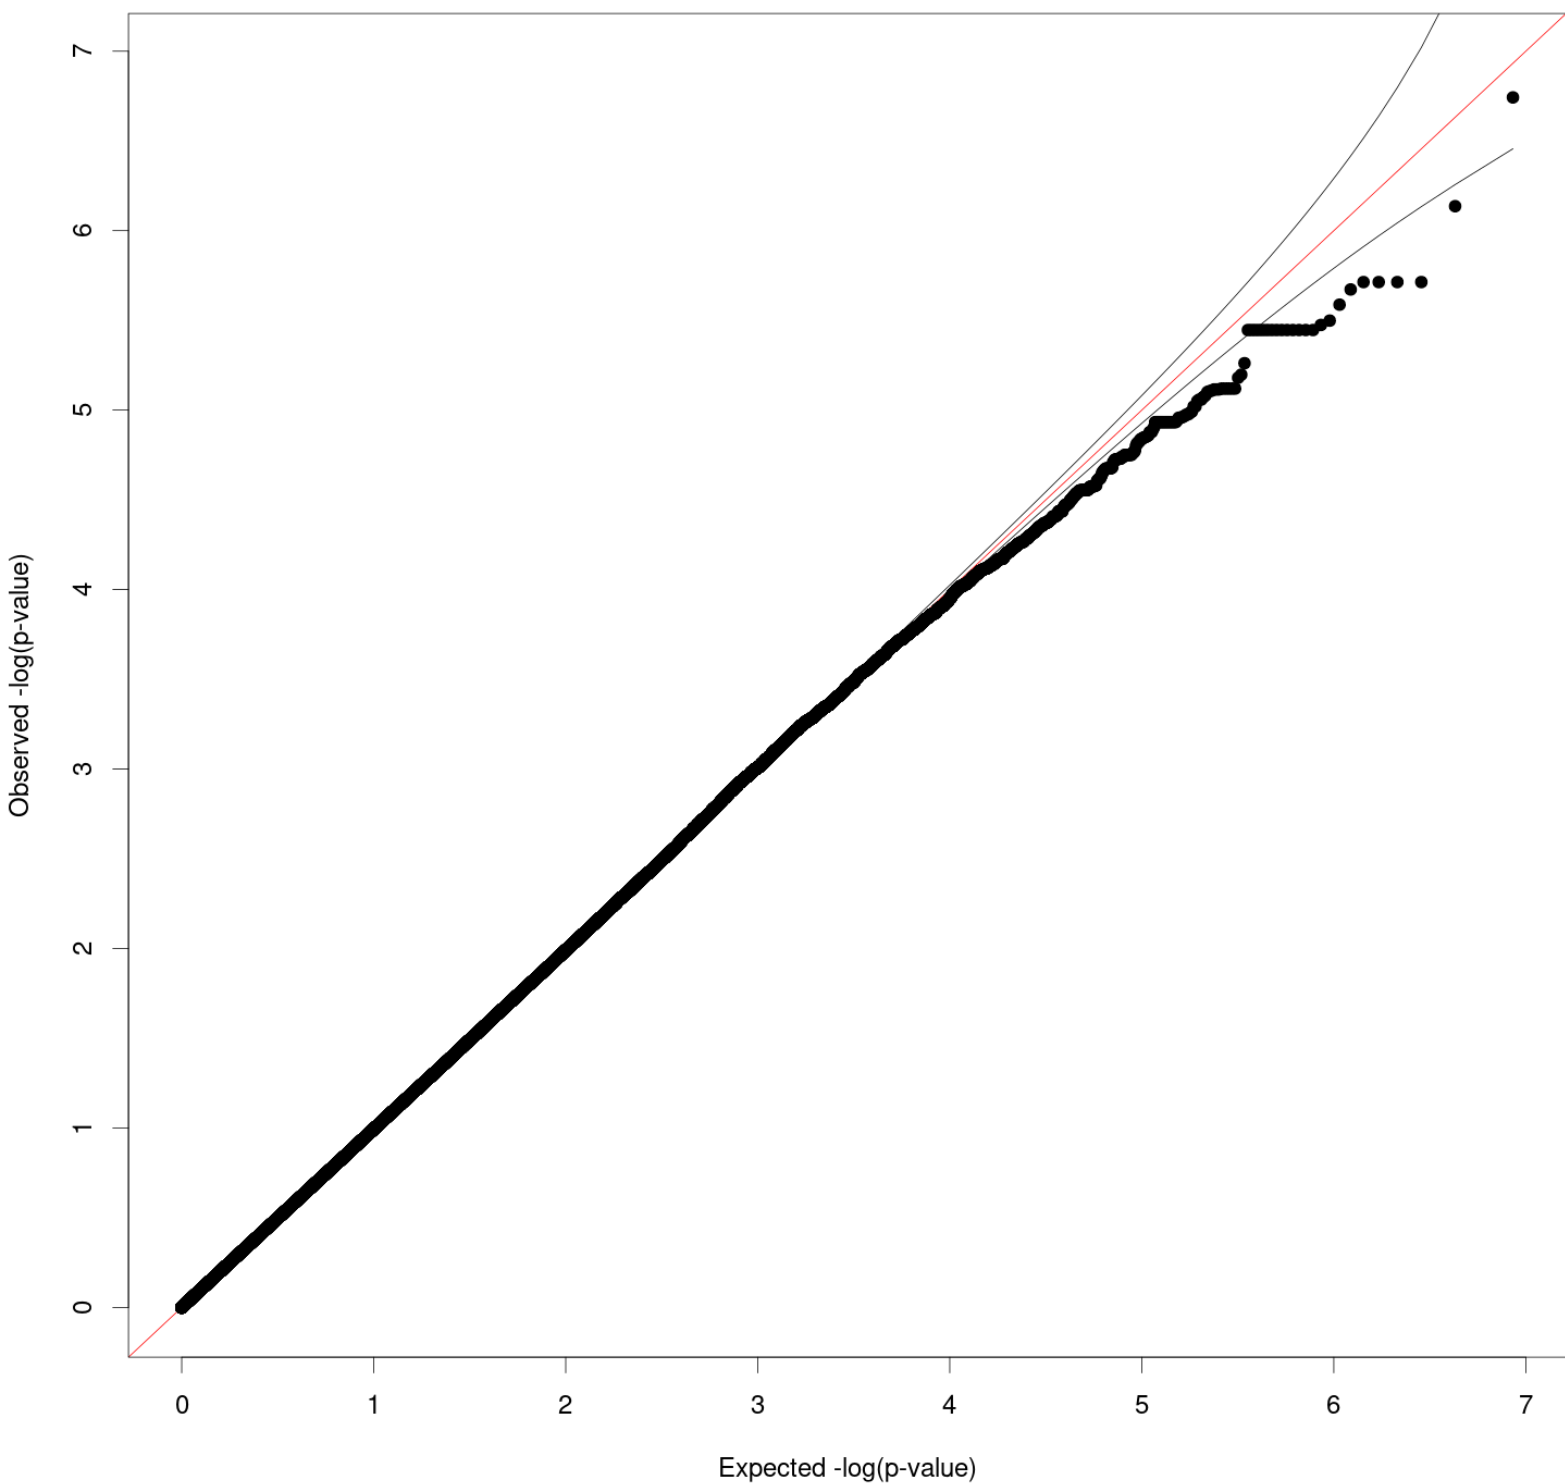

Supplement: s1 [file s1]
