# Supplementary material for: Crosstalk between Host Genome and Metabolome among People with HIV in South Africa
Source: MDPI journal article supplement (doi:10.3390/metabo12070624), 2022-07-06
Supplement: s1 [file s1]

**Supplementary Table S1. The 154 metabolites analyzed in GWAS.**

| <b>Metabolic Feature<br/>(m/z_Time[s])</b> | <b>Name</b>                          | <b>KEGG*<br/>ID</b> | <b>Liquid<br/>Chromatography</b> | <b>GWAS<br/>Inflation Factor</b> |
|--------------------------------------------|--------------------------------------|---------------------|----------------------------------|----------------------------------|
| mz87.0087_t22.3                            | pyruvate                             | C00022              | C18 negative                     | 1.00                             |
| mz89.0244_t22.1                            | (s)-lactate                          | C01432              | C18 negative                     | 0.99                             |
| mz103.0035_t94                             | malonate                             | C00383              | C18 negative                     | 1.00                             |
| mz104.0351_t26.8                           | serine                               | C00716              | C18 negative                     | 0.99                             |
| mz105.0193_t22.9                           | glycerate                            | C00258              | C18 negative                     | 1.00                             |
| mz112.0516_t24.7                           | creatinine                           | C00791              | C18 negative                     | 1.01                             |
| mz116.0716_t21.8                           | 5-aminopentanoate                    | C00431              | C18 negative                     | 1.00                             |
| mz123.045_t27.4                            | 3-hydroxybenzyl alcohol              | C03351              | C18 negative                     | 1.01                             |
| mz130.0873_t23                             | norleucine                           | C01933              | C18 negative                     | 0.99                             |
| mz131.0459_t20.7                           | 3-ureidopropionate                   | C02642              | C18 negative                     | 1.00                             |
| mz135.0306_t23.2                           | hypoxanthine                         | C00262              | C18 negative                     | 1.00                             |
| mz140.0118_t36.8                           | ethanolamine phosphate               | C00346              | C18 negative                     | 0.99                             |
| mz143.1077_t59.1                           | caprylic acid                        | C06423              | C18 negative                     | 1.00                             |
| mz145.0142_t24.5                           | alpha-ketoglutaric acid              | C00026              | C18 negative                     | 1.00                             |
| mz145.0618_t22.9                           | glutamine                            | C00064              | C18 negative                     | 1.00                             |
| mz145.0982_t37                             | lysine                               | C16440              | C18 negative                     | 1.00                             |
| mz147.0298_t23.1                           | citramalate                          | C00815              | C18 negative                     | 0.99                             |
| mz147.045_t46.9                            | trans-cinnamate                      | C10438              | C18 negative                     | 0.99                             |
| mz147.0661_t24.1                           | (rs)-mevalonic acid lithium salt     | C00418              | C18 negative                     | 1.01                             |
| mz148.0437_t35.7                           | methionine                           | C00073              | C18 negative                     | 0.99                             |
| mz149.0278_t28.8                           | 2-hydroxy-4-(methylthio)butyric acid | CA1484              | C18 negative                     | 1.02                             |
| mz151.026_t22.8                            | xanthine                             | C00385              | C18 negative                     | 0.99                             |
| mz154.0621_t21.1                           | histidine                            | C00135              | C18 negative                     | 1.01                             |
| mz162.056_t60.4                            | 3-methyl-2-oxindole                  | CA1325              | C18 negative                     | 1.00                             |
| mz164.0717_t22.7                           | phenylalanine                        | C00079              | C18 negative                     | 1.00                             |
| mz165.0557_t49.5                           | 3-(2-hydroxyphenyl)propanoate        | C01198              | C18 negative                     | 1.00                             |
| mz167.0211_t23.9                           | urate                                | C00366              | C18 negative                     | 1.00                             |
| mz173.0091_t25.6                           | trans-aconitate                      | C02341              | C18 negative                     | 1.00                             |
| mz173.0456_t23.2                           | shikimate                            | C00493              | C18 negative                     | 0.99                             |
| mz173.1044_t19.5                           | arginine                             | C00062              | C18 negative                     | 0.99                             |
| mz174.056_t47.1                            | indole-3-acetate                     | C00954              | C18 negative                     | 1.00                             |
| mz174.0884_t21.1                           | citrulline                           | C00327              | C18 negative                     | 1.01                             |
| mz176.0388_t26.6                           | formyl-l-methionyl peptide           | C03145              | C18 negative                     | 1.00                             |
| mz177.0405_t19.7                           | d-gulonic acid gama-lactone          | C01040              | C18 negative                     | 1.00                             |
| mz178.051_t30.3                            | hippurate                            | C01586              | C18 negative                     | 1.00                             |
| mz179.035_t25.5                            | caffeate                             | C01481              | C18 negative                     | 0.99                             |
| mz189.088_t31.9                            | ll-2,6-diaminoheptanedioate          | C00666              | C18 negative                     | 0.99                             |
| mz190.0544_t27.4                           | n-acetyl-dl-methionine               | CA1210              | C18 negative                     | 1.00                             |
| mz195.0511_t23.4                           | gluconic acid                        | C00257              | C18 negative                     | 1.00                             |

|                   |                                                                        |        |                |      |
|-------------------|------------------------------------------------------------------------|--------|----------------|------|
| mz197.0433_t40.7  | 3-methoxy-4-hydroxymandelate                                           | C05584 | C18 negative   | 1.00 |
| mz199.1704_t152.3 | lauric acid                                                            | C02679 | C18 negative   | 1.00 |
| mz202.1087_t40.9  | n6-(delta2-isopentenyl)-adenine                                        | C04083 | C18 negative   | 1.00 |
| mz206.0825_t46.2  | n-acetyl-l-phenylalanine                                               | C03519 | C18 negative   | 1.01 |
| mz209.0308_t34.2  | d-saccharic acid                                                       | C00818 | C18 negative   | 1.01 |
| mz218.1037_t23.6  | d-pantothenic acid                                                     | C00864 | C18 negative   | 1.00 |
| mz239.017_t24.2   | cystine                                                                | C01420 | C18 negative   | 1.00 |
| mz243.0627_t22.4  | uridine                                                                | C00299 | C18 negative   | 1.01 |
| mz245.0935_t49    | n-acetyl-d-tryptophan                                                  | C03137 | C18 negative   | 1.01 |
| mz253.2177_t230.4 | palmitoleic acid                                                       | C08362 | C18 negative   | 1.00 |
| mz266.0893_t18.4  | adenosine                                                              | C00212 | C18 negative   | 1.01 |
| mz279.2335_t237.1 | linoleate                                                              | C01595 | C18 negative   | 1.01 |
| mz281.2493_t256.8 | elaidic acid                                                           | C01712 | C18 negative   | 1.01 |
| mz283.265_t282.7  | stearate                                                               | C01530 | C18 negative   | 1.00 |
| mz301.239_t252    | rac-glycerol 1-myristate                                               | CA1370 | C18 negative   | 1.01 |
| mz307.0316_t28.5  | 2'-deoxyuridine 5'-mono-phosphate                                      | C00365 | C18 negative   | 1.00 |
| mz308.1_t22.3     | n-acetylneuraminate                                                    | C00270 | C18 negative   | 0.99 |
| mz311.296_t295.2  | arachidic acid                                                         | C06425 | C18 negative   | 1.01 |
| mz337.0532_t26.4  | 5-aminoimidazole-4-carboxamide-1-beta-d-ribofuranosyl 5'-monophosphate | C04677 | C18 negative   | 1.00 |
| mz347.0405_t30.1  | inosine 5'-monophosphate                                               | C00130 | C18 negative   | 1.00 |
| mz362.052_t33     | guanosine 5'-monophosphate                                             | C00144 | C18 negative   | 1.00 |
| mz375.2926_t209.2 | 3alpha-hydroxy-5beta-cholanate                                         | C03990 | C18 negative   | 1.00 |
| mz90.0551_t71.3   | beta-alanine                                                           | C00099 | HILIC positive | 1.00 |
| mz94.0653_t45.9   | aniline                                                                | C00292 | HILIC positive | 1.00 |
| mz96.0445_t35.3   | 2-hydroxypyridine                                                      | C02502 | HILIC positive | 0.99 |
| mz101.06_t20      | 5-valerolactone                                                        | C02240 | HILIC positive | 1.00 |
| mz102.055_t78.3   | 1-aminocyclopropane-1-carboxylate                                      | C01234 | HILIC positive | 1.00 |
| mz103.0391_t80.3  | 2-oxobutanoate                                                         | C00109 | HILIC positive | 1.01 |
| mz106.05_t115     | serine                                                                 | C00716 | HILIC positive | 0.99 |
| mz110.0272_t66.7  | hypotaurine                                                            | C00519 | HILIC positive | 1.00 |
| mz113.0347_t39.3  | uracil                                                                 | C00106 | HILIC positive | 1.00 |
| mz113.0597_t29.2  | sorbate                                                                | CA1411 | HILIC positive | 1.00 |
| mz114.0661_t40.7  | creatinine                                                             | C00791 | HILIC positive | 1.00 |
| mz116.0343_t85.6  | maleamate                                                              | C01596 | HILIC positive | 1.00 |
| mz116.0707_t58    | proline                                                                | C16435 | HILIC positive | 0.99 |
| mz118.0612_t73.1  | guanidinoacetate                                                       | C00581 | HILIC positive | 1.00 |
| mz123.0441_t56.2  | 3-hydroxybenzaldehyde                                                  | C03067 | HILIC positive | 0.99 |
| mz123.0552_t32.2  | nicotinamide                                                           | C00153 | HILIC positive | 1.00 |
| mz126.022_t55.6   | taurine                                                                | C00245 | HILIC positive | 0.99 |
| mz127.0503_t70.4  | 4-imidazoleacetic acid                                                 | C02835 | HILIC positive | 0.98 |

|                  |                                                       |        |                |      |
|------------------|-------------------------------------------------------|--------|----------------|------|
| mz130.0863_t52.9 | pipecolate                                            | C00408 | HILIC positive | 0.99 |
| mz132.0765_t72.5 | creatine                                              | C00300 | HILIC positive | 1.00 |
| mz133.0647_t24.9 | trans-cinnamaldehyde                                  | C00903 | HILIC positive | 1.00 |
| mz134.06_t21.2   | indoxyl sulfate                                       | C08481 | HILIC positive | 1.00 |
| mz136.0428_t56.3 | homocysteine                                          | C05330 | HILIC positive | 0.99 |
| mz137.0457_t39.7 | hypoxanthine                                          | C00262 | HILIC positive | 1.00 |
| mz138.055_t53.8  | trigonelline                                          | C01004 | HILIC positive | 0.99 |
| mz138.0795_t55.7 | 1-methylnicotinamide                                  | C02918 | HILIC positive | 1.00 |
| mz139.0502_t64.4 | urocanate                                             | C00785 | HILIC positive | 1.00 |
| mz144.0807_t46.2 | 1-naphthylamine                                       | C14790 | HILIC positive | 1.00 |
| mz147.0764_t81.7 | glutamine                                             | C00064 | HILIC positive | 1.00 |
| mz148.0757_t44.7 | 3-methyl-2-oxindole                                   | CA1325 | HILIC positive | 1.00 |
| mz150.0583_t52.3 | methionine                                            | C00073 | HILIC positive | 1.00 |
| mz153.0407_t42   | xanthine                                              | C00385 | HILIC positive | 1.00 |
| mz153.0772_t51.3 | arabitol                                              | CA1387 | HILIC positive | 1.00 |
| mz156.0767_t105  | histidine                                             | C00135 | HILIC positive | 1.00 |
| mz159.0515_t42.1 | allantoin                                             | C01551 | HILIC positive | 1.00 |
| mz162.1124_t80.7 | carnitine                                             | C00318 | HILIC positive | 1.00 |
| mz163.1229_t40.3 | (s)-nicotine                                          | C16150 | HILIC positive | 1.01 |
| mz164.0377_t43.9 | n-acetyl-l-cysteine                                   | C06809 | HILIC positive | 1.00 |
| mz166.0862_t46.5 | phenylalanine                                         | C00079 | HILIC positive | 1.00 |
| mz168.1019_t36   | 3-methoxytyramine                                     | C05587 | HILIC positive | 1.00 |
| mz169.0357_t49   | urate                                                 | C00366 | HILIC positive | 1.00 |
| mz169.0971_t67.2 | pyridoxamine                                          | C00534 | HILIC positive | 1.00 |
| mz175.0866_t42.7 | indole-3-acetamide                                    | C02693 | HILIC positive | 1.01 |
| mz176.0663_t49   | n-amidino-l-aspartate                                 | C03139 | HILIC positive | 1.00 |
| mz176.1029_t90.6 | citrulline                                            | C00327 | HILIC positive | 1.00 |
| mz178.0533_t51.9 | formyl-l-methionyl peptide                            | C03145 | HILIC positive | 1.00 |
| mz180.0329_t57.5 | s-carboxymethyl-l-cysteine                            | C03727 | HILIC positive | 1.00 |
| mz180.1019_t47.4 | 1-methyl-6,7-dihydroxy-1,2,3,4-tetrahydroisoquinoline | C09642 | HILIC positive | 1.00 |
| mz182.0811_t55.8 | tyrosine                                              | C00082 | HILIC positive | 0.99 |
| mz184.0603_t21   | 4-pyridoxate                                          | C00847 | HILIC positive | 1.00 |
| mz189.1233_t69.3 | alpha-acetyl-l-lysine                                 | C12989 | HILIC positive | 0.99 |
| mz190.0496_t20   | 4-hydroxy-2-quinolinecarboxylic acid                  | C01717 | HILIC positive | 1.01 |
| mz192.0655_t46.6 | 5-hydroxyindoleacetate                                | C05635 | HILIC positive | 1.00 |
| mz195.0505_t48.3 | d-glucuronic acid                                     | C00191 | HILIC positive | 1.01 |
| mz195.0651_t53.4 | ferulate                                              | C01494 | HILIC positive | 1.00 |
| mz198.076_t50.3  | 3,4-dihydroxy-l-phenylalanine (l-dopa)                | C00355 | HILIC positive | 0.99 |
| mz204.123_t63.1  | o-acetyl-l-carnitine                                  | C02571 | HILIC positive | 1.00 |
| mz205.0972_t45.9 | tryptophan                                            | C00078 | HILIC positive | 1.00 |
| mz209.0921_t47.2 | kynurenine                                            | C00328 | HILIC positive | 1.00 |

|                   |                                    |        |                |      |
|-------------------|------------------------------------|--------|----------------|------|
| mz212.0433_t126.8 | phosphocreatine                    | C02305 | HILIC positive | 1.00 |
| mz220.1182_t64.5  | d-pantothenic acid                 | C00864 | HILIC positive | 1.00 |
| mz221.092_t44.8   | 5-hydroxy-l-tryptophan             | C01017 | HILIC positive | 1.01 |
| mz222.0962_t43.6  | n-acetyl-d-glucosamine             | C00140 | HILIC positive | 1.00 |
| mz225.1484_t26.7  | methyl jasmonate                   | C11512 | HILIC positive | 1.00 |
| mz237.0362_t73.2  | quinat                             | C00296 | HILIC positive | 1.00 |
| mz241.0311_t181.3 | cystine                            | C00491 | HILIC positive | 0.99 |
| mz245.0769_t45.3  | uridine                            | C00299 | HILIC positive | 0.99 |
| mz245.0971_t55    | biotin                             | C00120 | HILIC positive | 1.01 |
| mz247.1076_t34.1  | n-acetyl-d-tryptophan              | C03137 | HILIC positive | 1.00 |
| mz255.2318_t21.7  | palmitoleic acid                   | C08362 | HILIC positive | 1.00 |
| mz258.1102_t114.4 | sn-glycero-3-phosphocholine        | C00670 | HILIC positive | 0.99 |
| mz266.1215_t33.8  | thiamine                           | C00378 | HILIC positive | 1.00 |
| mz269.0881_t43.1  | inosine                            | C00294 | HILIC positive | 1.00 |
| mz279.2319_t23.7  | gamma-linolenic acid               | C06426 | HILIC positive | 1.00 |
| mz281.2476_t28.9  | linoleate                          | C01595 | HILIC positive | 0.99 |
| mz301.2167_t26.6  | retinoate                          | C00777 | HILIC positive | 0.99 |
| mz302.3054_t35.1  | sphinganine                        | C00836 | HILIC positive | 1.00 |
| mz308.0929_t55.3  | glutathione                        | C00051 | HILIC positive | 0.98 |
| mz310.1137_t48.2  | n-acetylneuraminate                | C00270 | HILIC positive | 1.00 |
| mz319.0692_t48.2  | melanin                            | C05606 | HILIC positive | 1.00 |
| mz329.2502_t29.9  | docosahexaenoic acid               | C06429 | HILIC positive | 1.01 |
| mz330.0603_t50    | adenosine 3,5-cyclic monophosphate | C00575 | HILIC positive | 0.99 |
| mz344.2795_t32.4  | lauroylcarnitine                   | CA1406 | HILIC positive | 1.00 |
| mz347.2221_t21.9  | reichstein's substance s           | C05488 | HILIC positive | 1.00 |
| mz357.2999_t24    | 1-oleoyl-rac-glycerol              | CA1373 | HILIC positive | 0.99 |
| mz363.2163_t27.2  | cortisol                           | C00735 | HILIC positive | 1.01 |
| mz373.2371_t19.8  | deoxycorticosterone acetate        | C14554 | HILIC positive | 1.00 |
| mz377.1455_t37.9  | riboflavin                         | C00255 | HILIC positive | 0.99 |
| mz403.3574_t23.7  | 25-hydroxycholesterol              | C15519 | HILIC positive | 0.99 |
| mz409.2936_t20.8  | cholate                            | C00695 | HILIC positive | 0.99 |
| mz583.2537_t25.4  | biliverdin                         | C00500 | HILIC positive | 0.99 |
| mz585.2707_t23.2  | bilirubin                          | C00486 | HILIC positive | 0.99 |
| mz777.6935_t33.9  | thyroxine                          | C01829 | HILIC positive | 1.00 |

\*KEGG: Kyoto Encyclopedia of Genes and Genomes database.
